# Supplementary material for: Reprogramming in Candida albicans Gene Expression Network under Butanol Stress Abrogates Hyphal Development
Source: MDPI journal article supplement (doi:10.3390/ijms242417227), 2023-12-07
Supplement: s1 [file s1]

**Table S2 Differential gene expression when the serum and serum with butanol data were compared**

**S20 vs B20 Upregulated genes**

| <b>Gene I D</b> | <b>Fold change</b> | <b>Standard gene name</b> | <b>Name of <i>S. cerevisiae</i> ortholog(s)</b> |
|-----------------|--------------------|---------------------------|-------------------------------------------------|
| C2_06970W_A     | 57.6               | AAH1                      | AAH1                                            |
| C1_13870W_A     | 55.51              | MET3                      | MET3                                            |
| C5_00430W_A     | 25.47              | MET14                     | MET14                                           |
| C6_03320W_A     | 23.75              |                           | YHI9                                            |
| C2_06520C_A     | 16.09              |                           | TPC1                                            |
| CR_07740W_A     | 14.76              |                           |                                                 |
| C7_01520W_A     | 14.33              | FLU1                      | TPO1                                            |
| C7_03850W_A     | 12.91              |                           | NOC3                                            |
| C2_05620W_A     | 12.16              | KTI11                     | KTI11                                           |
| C3_06220C_A     | 12.04              | OAC1                      | OAC1                                            |
| C1_02450C_A     | 10.31              |                           | BUD20                                           |
| C1_03870C_A     | 10.1               |                           | YNL234W                                         |
| C5_03860W_A     | 9.79               | HAM1                      | HAM1                                            |
| C5_04030W_A     | 9.67               |                           |                                                 |
| C4_02610C_A     | 9.65               | SUL2                      | SUL1                                            |
| C1_05150C_A     | 9.32               |                           |                                                 |
| C2_04700C_A     | 8.75               |                           | UTP30                                           |
| C6_03390W_A     | 8.66               |                           | DIC1                                            |
| C4_04100C_A     | 8.6                | ECM1                      | ECM1                                            |
| C6_03440W_A     | 8.53               |                           | CCM1                                            |
| C2_07960C_A     | 8.49               | NSA1                      | NSA1                                            |
| C6_01770W_A     | 8.41               | RAD18                     | RAD18                                           |
| C1_13820C_A     | 8.35               |                           |                                                 |
| C1_00170W_A     | 8.29               | LEU4                      | LEU4                                            |
| C7_02340C_A     | 8.28               |                           | TRM82                                           |
| C1_07880C_A     | 8.27               | GCS1                      | GSH1                                            |
| C6_01180C_A     | 8.16               | EBP1                      |                                                 |
| CR_04110W_A     | 8.06               |                           | NAF1                                            |
| CR_04710W_A     | 7.99               |                           | CWC27                                           |
| C4_00800W_A     | 7.92               |                           | NSE4                                            |
| C2_06660W_A     | 7.87               |                           | RRP46                                           |
| C1_11410C_A     | 7.83               |                           |                                                 |
| C1_07790C_A     | 7.76               |                           | CMS1                                            |
| C1_00900W_A     | 7.75               | RRS1                      | RRS1                                            |
| C6_04320C_A     | 7.45               |                           |                                                 |
| C1_03060C_A     | 7.44               | TSR2                      | TSR2                                            |
| C7_03310W_A     | 7.43               |                           |                                                 |
| C2_06850W_A     | 7.39               |                           | SLX9                                            |
| C2_08530C_A     | 7.35               |                           | YML096W                                         |

|             |            |           |
|-------------|------------|-----------|
| C4_01200C_A | 7.32 AAT22 |           |
| C2_07410W_A | 7.23       | YMR210W   |
| C3_01560W_A | 7.22       | PRP43     |
| C7_03540C_A | 7.22 ENP2  | ENP2      |
| C2_04080W_A | 7.18       |           |
| C2_02940W_A | 7.14 MET1  | MET1      |
| C2_04570W_A | 7.13       | EBP2      |
| CR_04500C_A | 7.13       |           |
| C2_06530W_A | 7.01       | TAH11     |
| C1_07660W_A | 7          | URB1      |
| C5_02590C_A | 7          | SLS1      |
| C4_00200C_A | 6.86 MET15 | MET17     |
| C2_09160W_A | 6.82       | RRP45     |
| CR_08340W_A | 6.75 CYS3  | CYS3      |
| C2_02030W_A | 6.66 ARO3  | ARO3      |
| C2_05080C_A | 6.66       | BMT2      |
| C4_06710W_A | 6.62       |           |
| C1_02370C_A | 6.59       |           |
| C6_01890C_A | 6.54       | DBP9      |
| C2_06360C_A | 6.53 MAK16 | MAK16     |
| C3_04210W_A | 6.5        |           |
| C2_04190C_A | 6.49 UGA1  | UGA1      |
| C2_04120C_A | 6.46       | NOP12     |
| C2_10270W_A | 6.4 PUS7   | PUS7      |
| C4_05230C_A | 6.4        | RIX1      |
| C1_12310C_A | 6.35 CSI2  | BRX1      |
| C5_00450C_A | 6.35 IFG3  |           |
| C3_01150C_A | 6.34       | APD1      |
| CR_06570C_A | 6.33       |           |
| C1_05060W_A | 6.32 REI1  | REI1      |
| C1_12440W_A | 6.31       | REX4      |
| C4_01360W_A | 6.22 PGA53 |           |
| C6_04330W_A | 6.21 NOP8  | NOP8      |
| C4_02830C_A | 6.19 HCA4  | HCA4      |
| CR_02060W_A | 6.17       |           |
| C3_01200W_A | 6.11 UTP20 | UTP20     |
| C6_02770W_A | 6.11 MRT4  | MRT4      |
| C2_08550C_A | 6.07 MSU1  | DSS1      |
| C4_00510C_A | 6.07 RLP24 | RLP24     |
| CR_04750W_A | 6.06       | YLR363W-A |
| C4_04990C_A | 6.05       |           |
| C1_12790C_A | 6.03 FEN1  | ELO2      |
| C2_01830W_A | 6.03 PRP39 | PRP39     |
| C6_01530C_A | 6          | PMP1      |
| CR_10470C_A | 6          | BFR2      |
| C2_08480W_A | 5.97 RRP8  | RRP8      |
| C3_02130W_A | 5.93 UTP4  | UTP4      |

|             |      |         |
|-------------|------|---------|
| C6_01200W_A | 5.92 |         |
| CR_00900W_A | 5.92 | TRM1    |
| C1_14080W_A | 5.91 | UTP10   |
| C2_09660W_A | 5.89 | NOP16   |
| C1_12670C_A | 5.87 | PRP6    |
| C4_07150W_A | 5.84 | ATC1    |
| C1_09510W_A | 5.8  | YTM1    |
| C4_02220C_A | 5.8  | ZCF25   |
| C2_02580W_A | 5.79 |         |
| C5_01710C_A | 5.79 |         |
| C4_00810C_A | 5.77 | QRI7    |
| CR_10240W_A | 5.77 | UTP5    |
| C3_05170W_A | 5.73 | WOR2    |
| CR_01410C_A | 5.73 | YNL035C |
| CR_07310W_A | 5.63 |         |
| C2_09920W_A | 5.62 | RRG9    |
| CR_07030C_A | 5.61 | RRP36   |
| C1_09040C_A | 5.59 | HPM1    |
| C2_04230W_A | 5.59 | BAT21   |
| C1_04040C_A | 5.58 | NOP9    |
| CR_02420W_A | 5.58 | UTP23   |
| C2_00410C_A | 5.57 | ECM16   |
| C4_07030W_A | 5.56 | MET16   |
| C2_05160C_A | 5.51 | PUF6    |
| C2_10240W_A | 5.5  | GPD1    |
| C3_02020W_A | 5.48 | MRD1    |
| C2_01240C_A | 5.47 | CHL1    |
| C3_01680C_A | 5.47 | YDL183C |
| C1_04160C_A | 5.45 | YMR087W |
| C6_01600W_A | 5.45 |         |
| CR_05520W_A | 5.44 | NOC2    |
| C1_10970W_A | 5.42 | ESF1    |
| C2_02450C_A | 5.42 | UTP22   |
| C4_05010W_A | 5.4  | RSA4    |
| C7_01030C_A | 5.39 | RRP12   |
| CR_05630W_A | 5.39 | DBP8    |
| C1_06740C_A | 5.34 | NOP6    |
| C5_03630C_A | 5.34 |         |
| CR_09800C_A | 5.34 | UTP14   |
| C2_01970C_A | 5.33 | ROD1    |
| C1_05740C_A | 5.31 |         |
| C6_03540W_A | 5.31 |         |
| C2_09060C_A | 5.29 | ASN1    |
| C7_00690W_A | 5.29 | NOP15   |
| C1_04130W_A | 5.28 | ERB1    |
| C4_03830W_A | 5.26 | TRM3    |
| C1_03230C_A | 5.25 | ARX1    |

|             |             |         |
|-------------|-------------|---------|
| C2_05230C_A | 5.25 RPF2   | RPF2    |
| C6_03250W_A | 5.25 BMT4   |         |
| CR_04160C_A | 5.24        | GCD10   |
| C1_00160C_A | 5.22        | NSR1    |
| CR_01600C_A | 5.22        |         |
| CR_08490W_A | 5.22 TSR1   | TSR1    |
| C7_03700C_A | 5.21 ENP1   | ENP1    |
| C2_04860W_A | 5.18 PZF1   | PZF1    |
| C3_01430W_A | 5.18        | RRT14   |
| C4_02080W_A | 5.16        |         |
| C4_06950W_A | 5.14        | PUS5    |
| C6_03640W_A | 5.14 NOG2   | NOG2    |
| C3_02950C_A | 5.12 MET13  | MET13   |
| C4_05540W_A | 5.1 HOM3    | HOM3    |
| C3_04690C_A | 5.09        |         |
| C1_09710C_A | 5.06        | UTP7    |
| CR_03570C_A | 5.06 YVH1   | YVH1    |
| C7_00570W_A | 5.04 RPA135 | RPA135  |
| C2_05090W_A | 5.03 MAK5   | MAK5    |
| CR_02710W_A | 5.03 RRP9   | RRP9    |
| C1_03800W_A | 4.99 RPP1   | RPP1    |
| C5_03250W_A | 4.99 RMS1   | RKM4    |
| C5_04910W_A | 4.99        | EFG1    |
| C1_02620C_A | 4.98 HOM6   | HOM6    |
| C1_05000W_A | 4.98 RHD1   |         |
| C6_03930W_A | 4.98 OPT8   | YGL114W |
| CR_05660W_A | 4.97 SDA1   | SDA1    |
| C4_03840C_A | 4.96 RRP42  | RRP42   |
| C1_04390C_A | 4.95 NOP4   | NOP4    |
| C4_02260C_A | 4.92        | YMR310C |
| C1_05500W_A | 4.91 RSM22  | RSM22   |
| C2_06170C_A | 4.91 ECM17  | MET5    |
| C1_04120C_A | 4.85        | IST3    |
| C5_01090C_A | 4.85        |         |
| C1_11000C_A | 4.83        | CGR1    |
| C7_04190C_A | 4.81 UTP18  | UTP18   |
| C6_02150C_A | 4.8         | MFM1    |
| C1_02590C_A | 4.78 SNZ1   | SNZ1    |
| C1_12910W_A | 4.75        |         |
| C3_01000W_A | 4.75 BMS1   | BMS1    |
| C5_03920C_A | 4.72        | FCF1    |
| C7_01360C_A | 4.72        | ZIM17   |
| C1_09610W_A | 4.71        |         |
| C2_09320C_A | 4.71 PES1   | NOP7    |
| C2_08280W_A | 4.7 EAF3    | EAF3    |
| C3_02750W_A | 4.7         |         |
| CR_07750C_A | 4.69        | DBP6    |

|             |            |         |
|-------------|------------|---------|
| C1_11420W_A | 4.68 KRR1  | KRR1    |
| C1_04510W_A | 4.65       |         |
| CR_04170W_A | 4.64       | NOP2    |
| C3_05770C_A | 4.63 SAM50 | SAM50   |
| C5_01600C_A | 4.63 SPB4  | SPB4    |
| C6_03110C_A | 4.62       | ASA1    |
| C3_05590C_A | 4.61 BAT22 |         |
| C3_04560W_A | 4.59 MAK21 | MAK21   |
| CR_03650W_A | 4.59 SGD1  | SGD1    |
| C2_05750W_A | 4.57       | NOP53   |
| C3_04900W_A | 4.57 NOP14 | NOP14   |
| C6_01860C_A | 4.56 HCH1  | HCH1    |
| C6_02230W_A | 4.53       | LSG1    |
| C2_07910C_A | 4.51       |         |
| C4_05360C_A | 4.5        | PET54   |
| C7_03590C_A | 4.5        | ERC1    |
| C4_06720W_A | 4.48 NOP1  | NOP1    |
| C5_03080C_A | 4.48       | ESBP6   |
| C6_00370C_A | 4.48 NOP5  | NOP58   |
| C6_01170W_A | 4.48 CIC1  | CIC1    |
| C2_00960C_A | 4.46 MXR1  | MXR1    |
| C6_04160C_A | 4.46 SPB1  | SPB1    |
| C1_05050C_A | 4.45 RRP6  | RRP6    |
| C1_06760C_A | 4.41       | IPI3    |
| C3_02350W_A | 4.41       | KRI1    |
| C1_12630C_A | 4.4        | CWC15   |
| C2_04510W_A | 4.4 RIM2   | RIM2    |
| C3_06160C_A | 4.39       |         |
| C5_04750C_A | 4.39 HAS1  | HAS1    |
| CR_01620C_A | 4.39 MET6  | MET6    |
| C1_03830C_A | 4.38       | CSL4    |
| C5_03530C_A | 4.38       | COQ10   |
| C2_08200W_A | 4.37       |         |
| C3_07570C_A | 4.37       | CTO1    |
| C1_08170C_A | 4.36 BUL1  |         |
| C5_02550C_A | 4.36 UTP13 | UTP13   |
| C7_03400C_A | 4.36       | MTR4    |
| C7_02920W_A | 4.35       |         |
| C5_00310C_A | 4.34       |         |
| C2_10090C_A | 4.33       | MRX1    |
| C4_03030C_A | 4.33 NAN1  | NAN1    |
| C4_00540C_A | 4.32 NMD5  | NMD5    |
| C2_04350C_A | 4.31 SUV3  | SUV3    |
| C7_01200C_A | 4.3 DBP7   | DBP7    |
| C1_05990C_A | 4.28       | YDL144C |
| C2_09500W_A | 4.28       | DUS1    |
| CR_06230W_A | 4.28       |         |

|             |             |         |
|-------------|-------------|---------|
| C3_07300W_A | 4.27 NOP13  | NOP13   |
| C1_12030W_A | 4.26 SER33  | SER3    |
| C1_12750C_A | 4.26        | CDC40   |
| C1_11070W_A | 4.25 PET127 | PET127  |
| CR_03380W_A | 4.25 MTG1   | MTG1    |
| CR_06770C_A | 4.25        |         |
| C1_07960W_A | 4.24        | LRP1    |
| C1_02600W_A | 4.23 SNO1   | SNO1    |
| C3_05160C_A | 4.22        | DBP10   |
| C4_06210C_A | 4.22        | NUG1    |
| C1_09490C_A | 4.21 GUA1   | GUA1    |
| C2_09380W_A | 4.2 RRP15   | RRP15   |
| CR_01710W_A | 4.2         | TMA23   |
| C1_07140C_A | 4.19 RIA1   | RIA1    |
| C1_13380W_A | 4.19        | BUD13   |
| C3_03650W_A | 4.18 HBR3   | NOB1    |
| C5_02440C_A | 4.18        | BUD32   |
| C5_01610W_A | 4.17        | DEG1    |
| CR_02980C_A | 4.17 SRP40  | SRP40   |
| C1_01530C_A | 4.15        | YDR341C |
| C1_07930C_A | 4.15 ERD1   | ERD1    |
| C1_08290C_A | 4.15 DIP2   | DIP2    |
| C1_10800C_A | 4.15 ALP1   |         |
| C6_02910W_A | 4.13 POP4   | POP4    |
| C3_06380W_A | 4.12 NSA2   | NSA2    |
| CR_02030C_A | 4.12        | RCM1    |
| C2_08180C_A | 4.11        | RRP14   |
| C7_02660C_A | 4.11        | LSM12   |
| CR_08890C_A | 4.11 ASR2   |         |
| C7_01570C_A | 4.09        |         |
| C4_00650W_A | 4.08 HIS5   | HIS5    |
| C4_02800W_A | 4.06 RPC53  | RPC53   |
| C4_02790C_A | 4.05 SAS10  | SAS10   |
| C5_05190W_A | 4.05 PCL5   | PCL5    |
| C1_01160C_A | 4.04        | RRP40   |
| C1_00280C_A | 4.03 RFC52  |         |
| C6_00940C_A | 4.03        | PRM5    |
| CR_10540C_A | 4.03 MCD1   | MCD1    |
| C1_10250C_A | 4.02        |         |
| C2_02540W_A | 4.02        | RRP5    |
| CR_01780W_A | 4.01        | BMT6    |
| CR_06480C_A | 4.01 RRN11  | RRN11   |
| C1_10670C_A | 3.99 RPA190 | RPA190  |
| C2_07450C_A | 3.99 RCL1   | RCL1    |
| C4_02770C_A | 3.98        | CDC123  |
| CR_06110C_A | 3.98 RFX1   | RFX1    |
| CR_10690W_A | 3.98 POP3   | POP3    |

|             |            |         |
|-------------|------------|---------|
| C2_06480W_A | 3.96       | TRM10   |
| CR_03370C_A | 3.95 KTI12 | KTI12   |
| C6_00680C_A | 3.94       |         |
| CR_09660W_A | 3.94       | YLR287C |
| C2_05070W_A | 3.93 FRE9  |         |
| C2_08000C_A | 3.92 KRE30 | ARB1    |
| C3_05460W_A | 3.92       |         |
| C3_02670W_A | 3.91       | RSA1    |
| C3_04340W_A | 3.89 ATF1  |         |
| C3_06720W_A | 3.89 PRP5  | PRP5    |
| C1_11450C_A | 3.88 SAM2  | SAM2    |
| C5_01430C_A | 3.88       | RBA50   |
| CR_04240C_A | 3.88       | KRE33   |
| CR_06720W_A | 3.88 NMD3  | NMD3    |
| CR_10550W_A | 3.88 DRS1  | DRS1    |
| C1_04710C_A | 3.87       | RSA3    |
| C1_08190C_A | 3.87 CAT8  | CAT8    |
| C1_08870C_A | 3.87 JIP5  | JIP5    |
| C1_06440C_A | 3.86       |         |
| C1_13370W_A | 3.86       | YDR161W |
| C3_00370C_A | 3.86 BUD21 | BUD21   |
| C3_05070W_A | 3.86 CEM1  | CEM1    |
| C5_03310C_A | 3.86 PCL1  | PCL1    |
| C6_01040C_A | 3.86       | DHR2    |
| CR_03550W_A | 3.86 NCS2  | NCS2    |
| C1_01150C_A | 3.85       | PPM2    |
| C1_10030W_A | 3.85 DBP3  | DBP3    |
| C1_02970W_A | 3.84       |         |
| C1_11870W_A | 3.84 MUP1  | MUP1    |
| C4_01450W_A | 3.84 PWP1  | PWP1    |
| C7_01270C_A | 3.84       | CMR1    |
| C2_02630W_A | 3.83       | RRN7    |
| C5_03970W_A | 3.83       |         |
| C5_01480W_A | 3.81 FYV5  | FYV7    |
| C2_05830C_A | 3.79       | SHQ1    |
| C3_02040C_A | 3.79       | LOC1    |
| C4_07140W_A | 3.79       | UPS2    |
| C7_01300C_A | 3.79 PSF1  | PSF1    |
| C7_01950W_A | 3.79       | RBD2    |
| CR_03940W_A | 3.79       | IPI1    |
| C2_07920W_A | 3.78       | RRT2    |
| C1_14160W_A | 3.76       | RKM3    |
| C2_03700W_A | 3.76       | NTA1    |
| C3_06370C_A | 3.76       | LCP5    |
| CR_09730C_A | 3.76 SSF1  | SSF1    |
| C4_06790W_A | 3.75       | GPN3    |
| CR_03980W_A | 3.75       | YJR056C |

|             |             |         |
|-------------|-------------|---------|
| C7_00330C_A | 3.74        | SUA5    |
| CR_05620C_A | 3.74 MTG2   | MTG2    |
| C2_01060C_A | 3.73        | JJJ3    |
| C2_02430W_A | 3.73 UTP21  | UTP21   |
| C3_04380C_A | 3.73        | SNU13   |
| C5_01680C_A | 3.73 CCN1   |         |
| C1_01750W_A | 3.72        | YCR023C |
| C1_07150W_A | 3.72        |         |
| C1_07950C_A | 3.72        | RRP17   |
| C2_00840W_A | 3.72        | TAH18   |
| C1_12760W_A | 3.71        | BCP1    |
| C2_09180W_A | 3.7         | RNH202  |
| C1_14320C_A | 3.69        | FMP41   |
| C4_01370W_A | 3.69 ILV6   | ILV6    |
| C1_12680W_A | 3.68        | RRB1    |
| C3_01300C_A | 3.67 NCE103 | NCE103  |
| C3_05440C_A | 3.67        | AIM23   |
| C3_06030W_A | 3.67 NOG1   | NOG1    |
| C1_05630C_A | 3.66        | KAP123  |
| C1_06250W_A | 3.66        |         |
| C1_12800W_A | 3.66        |         |
| C6_03630W_A | 3.66 PAD1   | PAD1    |
| CR_04210C_A | 3.66 QDR1   | QDR1    |
| C2_03690C_A | 3.65        |         |
| CR_09150W_A | 3.65        |         |
| C2_01740C_A | 3.64        | MRPL31  |
| C2_08800C_A | 3.64 APE3   | APE3    |
| C4_04880W_A | 3.64 FGR10  |         |
| C1_02250W_A | 3.63 CWH8   | CAX4    |
| C1_01870C_A | 3.62 CYS4   | CYS4    |
| C1_04880C_A | 3.62 MRPL37 | MRPL37  |
| C4_02010C_A | 3.62 HSX11  |         |
| C5_03640W_A | 3.62        |         |
| C5_03840W_A | 3.62        | THI80   |
| C2_06210C_A | 3.61 SER1   | SER1    |
| C3_05570W_A | 3.61 QDR2   |         |
| C3_07550C_A | 3.61        | GEP3    |
| CR_02170W_A | 3.6 MET2    | MET2    |
| CR_04560C_A | 3.6         | RAD27   |
| CR_07860C_A | 3.6 ASF1    | ASF1    |
| C1_01030W_A | 3.59 HMT1   | HMT1    |
| C1_02380C_A | 3.58        | CIN4    |
| C2_01070W_A | 3.58        | RPA49   |
| C1_10620W_A | 3.57        | CBF5    |
| C3_07540C_A | 3.57        |         |
| C4_05650W_A | 3.57        | FAF1    |
| C6_02490C_A | 3.56        |         |



|             |      |        |         |
|-------------|------|--------|---------|
| C1_02080W_A | 3.55 | SET6   | SET6    |
| C3_05140C_A | 3.55 |        | TRM11   |
| CR_06330C_A | 3.54 |        | YML108W |
| CR_08500W_A | 3.54 |        | SYO1    |
| C1_04340C_A | 3.53 |        | YMR010W |
| C1_08810C_A | 3.53 | MSS116 | MSS116  |
| C5_04570C_A | 3.53 | URA7   | URA7    |
| C4_03190W_A | 3.52 |        |         |
| C5_05410C_A | 3.52 | ILV3   | ILV3    |
| C7_03930C_A | 3.51 | MAM33  | MAM33   |
| C1_10110W_A | 3.5  |        |         |
| CR_09950C_A | 3.5  | SIK1   | NOP56   |
| CR_10190C_A | 3.5  |        |         |
| C1_00560W_A | 3.49 | CNS1   | CNS1    |
| C4_04840C_A | 3.49 | AGP3   | AGP3    |
| C1_11550W_A | 3.48 | GAR1   | GAR1    |
| C2_05190W_A | 3.47 | CDC21  | CDC21   |
| C4_04470W_A | 3.47 | SAP10  |         |
| C1_05110C_A | 3.46 | ARO4   | ARO4    |
| C2_05860C_A | 3.46 |        | XBP1    |
| C6_00320C_A | 3.45 | DNA2   | DNA2    |
| C7_03570W_A | 3.45 | ARG4   | ARG4    |
| C1_03540C_A | 3.44 |        | ILM1    |
| C1_13400C_A | 3.44 | AGC1   | AGC1    |
| C4_03170W_A | 3.44 |        | NSE3    |
| C3_07660W_A | 3.43 |        | RAD4    |
| C6_01290C_A | 3.43 | QDR3   | QDR3    |
| CR_01950W_A | 3.42 |        | RPA43   |
| C1_12280C_A | 3.41 |        | MRPL13  |
| C3_07580W_A | 3.41 |        |         |
| C5_03470C_A | 3.41 |        |         |
| C6_01420C_A | 3.41 |        |         |
| C1_11380W_A | 3.4  | NEP1   | EMG1    |
| CR_02430C_A | 3.4  |        | FAP1    |
| CR_07600W_A | 3.4  |        | FUN30   |
| C2_03200W_A | 3.39 | PRP3   | PRP3    |
| C3_07750W_A | 3.39 | UTP9   | UTP9    |
| CR_09370W_A | 3.39 | ELF1   | NEW1    |
| C2_04200W_A | 3.38 | TBF1   | TBF1    |
| C2_02420C_A | 3.37 |        | DUS3    |
| C2_05840W_A | 3.37 |        | DPH1    |
| C4_04160W_A | 3.37 |        |         |
| C1_11230W_A | 3.36 | FGR39  |         |
| C7_01370W_A | 3.36 |        |         |
| C2_00390C_A | 3.35 |        | STR3    |
| C4_04520W_A | 3.35 |        | PXR1    |
| C6_00760W_A | 3.34 |        | FES1    |

|             |      |       |         |
|-------------|------|-------|---------|
| CR_09900C_A | 3.34 | DPB2  | DPB2    |
| C2_02950W_A | 3.33 |       | BNA3    |
| C3_05510W_A | 3.33 |       |         |
| C5_00680W_A | 3.33 | RMT2  | RMT2    |
| C5_01060C_A | 3.33 | BUD23 | BUD23   |
| C6_01120C_A | 3.33 |       | STE14   |
| C5_04580C_A | 3.32 |       | VPS25   |
| C1_05020C_A | 3.31 | ARG2  | ARG2    |
| CR_00390W_A | 3.31 |       |         |
| C1_00340W_A | 3.3  | HBR1  | FAP7    |
| C3_00320W_A | 3.28 | RHR2  | GPP1    |
| C3_04370C_A | 3.28 |       | URB2    |
| C5_03410C_A | 3.28 |       | MRPL20  |
| C2_06830C_A | 3.27 | FHL1  | FHL1    |
| C5_03810C_A | 3.27 |       |         |
| CR_00080W_A | 3.27 | MIS12 |         |
| C1_10080W_A | 3.26 |       | CWC21   |
| C4_02750W_A | 3.26 | HIT1  | HIT1    |
| C1_03840W_A | 3.25 |       |         |
| C1_09170W_A | 3.25 | CTA8  | HSF1    |
| C2_05050C_A | 3.25 |       | GNT1    |
| C6_02960W_A | 3.25 |       | YGR012W |
| C1_12570C_A | 3.24 |       | ELP4    |
| C2_06700W_A | 3.24 | AMO2  |         |
| C4_03730C_A | 3.24 |       | TRM5    |
| C4_02850W_A | 3.22 |       | ELP2    |
| C4_03740W_A | 3.22 |       | RRP4    |
| CR_01480W_A | 3.22 | PRS   | AIM10   |
| C7_01170C_A | 3.21 |       |         |
| CR_06840W_A | 3.21 |       | UTP25   |
| CR_09760W_A | 3.2  | MED21 | SRB7    |
| C1_11610C_A | 3.19 |       |         |
| C2_06640C_A | 3.19 | VAS1  | VAS1    |
| C2_07000W_A | 3.18 |       | YCR051W |
| C3_03550C_A | 3.18 | ULP1  |         |
| C4_00750C_A | 3.18 |       |         |
| C5_02120C_A | 3.18 | RIX7  | RIX7    |
| CR_06450W_A | 3.18 |       | GRC3    |
| C2_00070C_A | 3.17 | MPP10 | MPP10   |
| C4_00960W_A | 3.16 | PTC8  |         |
| C6_00950C_A | 3.16 | TOP1  | TOP1    |
| C6_02300C_A | 3.16 |       |         |
| C4_06960W_A | 3.15 |       |         |
| CR_06300C_A | 3.15 | FGR50 |         |
| C3_01770C_A | 3.14 |       | SCM3    |
| C3_07140C_A | 3.14 |       |         |
| C4_00140C_A | 3.14 | HIS4  | HIS4    |

|             |             |         |
|-------------|-------------|---------|
| CR_07710W_A | 3.14 ARO2   | ARO2    |
| C4_00700C_A | 3.13        |         |
| C5_00630C_A | 3.13 EXO1   | EXO1    |
| C5_05340W_A | 3.13        | SQT1    |
| C6_02420W_A | 3.13        | PGC1    |
| C6_02440C_A | 3.13 PRP45  | PRP45   |
| C7_03880C_A | 3.13        |         |
| C3_06390W_A | 3.12        |         |
| C4_00740W_A | 3.12        | POP7    |
| C7_03720C_A | 3.12 HIS7   | HIS7    |
| C3_04860W_A | 3.11        | SFP1    |
| C4_04810C_A | 3.11        | TRM8    |
| C1_05330C_A | 3.1         | YDR306C |
| C2_08670C_A | 3.1 UTP15   | UTP15   |
| C3_03810W_A | 3.1 RAD53   | RAD53   |
| CR_08940W_A | 3.1         | GCD14   |
| CR_10410C_A | 3.1         | PNO1    |
| C2_04820W_A | 3.09        | MRM1    |
| C2_06750C_A | 3.09        |         |
| CR_06970C_A | 3.09        | LIN1    |
| C1_13130C_A | 3.08        |         |
| C1_13200C_A | 3.08 REX3   | REX3    |
| C3_03470W_A | 3.08        | UGA2    |
| C1_05510C_A | 3.07 RPS27A | RPS27A  |
| C1_12210W_A | 3.07 TRP3   | TRP3    |
| C3_02180C_A | 3.07        | DYS1    |
| CR_02890C_A | 3.07        | RPC82   |
| C1_00640C_A | 3.06 RPO41  | RPO41   |
| C1_03400W_A | 3.06        | ART5    |
| C2_10740C_A | 3.06        | EMW1    |
| C7_03170W_A | 3.06 IFA21  |         |
| CR_03340C_A | 3.06        | SLD2    |
| CR_07950W_A | 3.06 IMP4   | IMP4    |
| C2_04530W_A | 3.05 MED8   | MED8    |
| C2_06130W_A | 3.05        | CSM3    |
| C3_05800W_A | 3.05        | SEN54   |
| C3_06540C_A | 3.05        |         |
| CR_00810W_A | 3.05        |         |
| CR_01700C_A | 3.05        | PRP24   |
| C2_07340W_A | 3.04 NOC4   | NOC4    |
| C3_05090C_A | 3.04        |         |
| C3_07400W_A | 3.04        | TRM7    |
| C6_04260C_A | 3.04        | JLP2    |
| C1_02880C_A | 3.03 MIA40  | MIA40   |
| C1_05930C_A | 3.03        | DUG2    |
| C2_01400C_A | 3.03 ESC4   | RTT107  |
| C4_07060W_A | 3.03        | RPO31   |

|             |            |         |
|-------------|------------|---------|
| C7_04090C_A | 3.03       |         |
| C1_03790C_A | 3.02       | FPR3    |
| C1_06540C_A | 3.01       | RRP43   |
| C2_07360W_A | 3.01       | TGS1    |
| C3_02320W_A | 3.01 ILV2  | ILV2    |
| C3_07650C_A | 3.01       |         |
| C5_03360W_A | 3.01 RPO26 | RPO26   |
| C7_01400C_A | 3.01       | RRN5    |
| C3_02370C_A | 3 ALR1     | ALR1    |
| CR_03760W_A | 3          | NNT1    |
| C1_13360C_A | 2.99 RMP1  | RMP1    |
| C5_00920W_A | 2.99       | DIB1    |
| C7_01490W_A | 2.99       |         |
| C1_00840C_A | 2.98 NRM1  |         |
| C1_10640C_A | 2.98 PEA2  | PEA2    |
| C2_05980C_A | 2.98       | TES1    |
| C7_00370W_A | 2.98 DCC1  | DCC1    |
| CR_03200C_A | 2.98       | POP1    |
| C2_03070C_A | 2.97 SMP3  | SMP3    |
| C3_02390W_A | 2.97       |         |
| CR_00800C_A | 2.97 PWP2  | PWP2    |
| CR_01590C_A | 2.97 TRP2  | TRP2    |
| CR_10260W_A | 2.97       | MRM2    |
| C1_09910C_A | 2.96       |         |
| C3_02700W_A | 2.96 SMC3  | SMC3    |
| CR_05570C_A | 2.96 RNR3  |         |
| C3_01450C_A | 2.95 MET18 | MET18   |
| CR_01570W_A | 2.95       | PTH2    |
| C2_02690W_A | 2.94 SER2  | SER2    |
| C2_07130C_A | 2.94 RCK2  | RCK2    |
| C3_00100W_A | 2.94       | YJU2    |
| C3_04270C_A | 2.94 CTP1  | CTP1    |
| C4_06670W_A | 2.94       |         |
| CR_01670W_A | 2.94       |         |
| CR_03110W_A | 2.94       | MSE1    |
| C1_03460C_A | 2.93       |         |
| C1_05210C_A | 2.93       | YNR040W |
| C2_04990W_A | 2.93       | SLD7    |
| C2_06190W_A | 2.93 ILV1  | ILV1    |
| C1_06750W_A | 2.92       |         |
| C2_01870C_A | 2.92       |         |
| C4_03870C_A | 2.92       | NUR1    |
| C5_04290C_A | 2.92       |         |
| C6_01300W_A | 2.92       | CST26   |
| C4_01560C_A | 2.9        | BUL1    |
| C1_01110C_A | 2.89 ZPR1  | ZPR1    |
| C2_08030W_A | 2.89       |         |

|             |             |           |
|-------------|-------------|-----------|
| CR_04300W_A | 2.89        | NCL1      |
| CR_10650W_A | 2.89 LTV1   | LTV1      |
| C3_01480C_A | 2.88 RKI1   | RKI1      |
| C1_10200C_A | 2.87        | HOL1      |
| C3_05280C_A | 2.87        |           |
| C4_06940C_A | 2.87        |           |
| C2_06650C_A | 2.86        | PRP31     |
| C4_00210W_A | 2.86        | YPL034W   |
| C6_02170C_A | 2.86 SWD3   | SWD3      |
| C1_07200W_A | 2.85 YMC1   | YMC1      |
| C5_02410C_A | 2.85        |           |
| C5_03700C_A | 2.85        | DPH5      |
| CR_00680W_A | 2.85 BUD22  | BUD22     |
| CR_01550C_A | 2.85        | YBL055C   |
| CR_06980W_A | 2.85        | LTO1      |
| CR_10750C_A | 2.85        | YCR087C-A |
| C1_07470C_A | 2.84        | IRC3      |
| C1_11880W_A | 2.84        | MRPL51    |
| C2_09600C_A | 2.84        | YCR090C   |
| C4_04110W_A | 2.84        |           |
| C6_00530C_A | 2.84        | SME1      |
| C6_02900C_A | 2.84        | AIM22     |
| C1_00510W_A | 2.83        | ECM31     |
| C1_04350C_A | 2.82        |           |
| C1_05820C_A | 2.82 RAD10  | RAD10     |
| C3_06530W_A | 2.82        |           |
| C5_00820W_A | 2.82        | MRPL17    |
| C1_00990C_A | 2.81 NMA111 | NMA111    |
| C2_10230W_A | 2.81        | MET32     |
| C3_05380W_A | 2.81        | YJL163C   |
| CR_01690C_A | 2.81 CDC60  | CDC60     |
| C1_01450W_A | 2.8 ABC1    | COQ8      |
| C1_13330C_A | 2.8         | SPE4      |
| C5_05010W_A | 2.8         | SNN1      |
| C6_04240W_A | 2.8         |           |
| CR_08100C_A | 2.8 RIO2    | RIO2      |
| C1_12110C_A | 2.79        |           |
| C2_01050W_A | 2.79        |           |
| C2_05890C_A | 2.79 IDP1   | IDP1      |
| C2_10140W_A | 2.79        | UBP8      |
| C4_01130C_A | 2.79        | VPS71     |
| C5_04650C_A | 2.79 MSM1   | MSM1      |
| C6_00670W_A | 2.79 CDC14  | CDC14     |
| C7_03210W_A | 2.79        |           |
| C1_09540W_A | 2.78        |           |
| C2_02490C_A | 2.78        | YPK9      |
| C3_03200C_A | 2.78        | YDR286C   |

|             |      |        |
|-------------|------|--------|
| C6_00380C_A | 2.78 |        |
| CR_08020C_A | 2.78 | NOP10  |
| C1_13470W_A | 2.77 | KNS1   |
| C2_09750W_A | 2.77 | LEU42  |
| C3_00330W_A | 2.77 | UTP8   |
| CR_01030W_A | 2.77 | DAL81  |
| CR_02370W_A | 2.77 | ERG25  |
| CR_08000C_A | 2.77 |        |
| CR_08880C_A | 2.77 |        |
| C1_00910W_A | 2.76 | TRI1   |
| C1_09010W_A | 2.76 | NAR1   |
| C1_10340W_A | 2.76 |        |
| C2_00080C_A | 2.76 | FAV3   |
| C2_09140C_A | 2.76 | MET10  |
| C3_02560W_A | 2.76 | DDC1   |
| C3_04710W_A | 2.76 | ARV1   |
| C4_03350C_A | 2.76 |        |
| C4_05460C_A | 2.76 | OFD1   |
| C5_03460C_A | 2.76 |        |
| C6_03220W_A | 2.76 |        |
| C7_00160C_A | 2.76 | ALB1   |
| CR_06510W_A | 2.76 |        |
| CR_07510W_A | 2.76 | SMB1   |
| CR_08580C_A | 2.76 |        |
| C4_07090C_A | 2.75 | TRP4   |
| C6_00660C_A | 2.75 | AIM7   |
| C7_00220W_A | 2.75 |        |
| C1_03260W_A | 2.74 | MGS1   |
| C1_06510C_A | 2.74 | MCH4   |
| C2_01410C_A | 2.74 | CLB2   |
| C2_02930C_A | 2.74 | ETT1   |
| C2_06460W_A | 2.74 | RTA3   |
| C5_05280C_A | 2.74 | SDH4   |
| C1_02190W_A | 2.73 | ABP140 |
| C1_06350W_A | 2.73 |        |
| C2_01430W_A | 2.73 | APT1   |
| C5_03010W_A | 2.73 | SNU66  |
| C6_02690C_A | 2.73 | MRN1   |
| CR_06120W_A | 2.73 | RPL7   |
| C1_02470W_A | 2.72 |        |
| C4_02870C_A | 2.72 | ZUO1   |
| C5_00700C_A | 2.72 | SPE2   |
| C5_03550W_A | 2.72 | NUP2   |
| C1_11910W_A | 2.71 | THP1   |
| C3_02910W_A | 2.71 |        |
| C4_03900C_A | 2.71 | RAM1   |
| CR_03680C_A | 2.71 | SMC1   |

|             |            |        |
|-------------|------------|--------|
| C1_07710C_A | 2.7 ADE4   | ADE4   |
| C6_01980C_A | 2.7        | MRPS18 |
| C7_03530C_A | 2.7 ISY1   | ISY1   |
| C2_03950W_A | 2.69       | MRPL24 |
| C2_09900C_A | 2.69 TIM23 | TIM23  |
| C3_02850C_A | 2.69       | ATF2   |
| C4_01280C_A | 2.69       | PRP21  |
| C4_02990C_A | 2.69 GST2  |        |
| C5_02540C_A | 2.69 SPR28 |        |
| C6_02350C_A | 2.69       | PUS1   |
| CR_09310W_A | 2.69       | RKM1   |
| C2_05340C_A | 2.68 RPC40 | RPC40  |
| C2_07680W_A | 2.68       | MRPL7  |
| C6_01030W_A | 2.68 HAL22 |        |
| C1_07500C_A | 2.67 LHP1  | LHP1   |
| C2_04300C_A | 2.67       | MRX11  |
| C2_05330C_A | 2.67       |        |
| C3_01310W_A | 2.67       | IRC5   |
| C3_02460C_A | 2.67 PHA2  | PHA2   |
| C4_04730W_A | 2.67 BAS1  | BAS1   |
| CR_05480W_A | 2.67       | ODC1   |
| CR_08960C_A | 2.67 MPS1  | MPS1   |
| C3_07620C_A | 2.66 RIT1  | RIT1   |
| C4_00880W_A | 2.66       | CCA1   |
| C2_05200C_A | 2.65 SGO1  | SGO1   |
| C2_06810C_A | 2.65 RPL11 | RPL11B |
| C4_00690C_A | 2.65       | DPH2   |
| C6_02430W_A | 2.65       | ITC1   |
| C1_09390W_A | 2.64       | MOD5   |
| C2_03920C_A | 2.64 GPI13 | GPI13  |
| C4_04220W_A | 2.64 DUO1  |        |
| C6_03210C_A | 2.64       | RPC34  |
| C7_01020C_A | 2.64       | MRPS16 |
| C4_06410W_A | 2.63       | SYF1   |
| C7_00560C_A | 2.63 THG1  | THG1   |
| C1_02090C_A | 2.62       | DRN1   |
| C2_03830W_A | 2.62       | DPH6   |
| C7_00530C_A | 2.62 PSF3  | PSF3   |
| CR_06910W_A | 2.62 BUD5  | BUD5   |
| C4_06850C_A | 2.61       | MAP1   |
| C5_02290W_A | 2.61 PDE1  | PDE1   |
| C5_05080W_A | 2.61 GRF10 | PHO2   |
| C1_05220C_A | 2.6        |        |
| C1_08630W_A | 2.6        | MTF2   |
| CR_05550C_A | 2.6        | RET1   |
| C2_00810C_A | 2.59       |        |
| C4_05000W_A | 2.59       |        |

|             |            |         |
|-------------|------------|---------|
| C5_02010C_A | 2.59       | BUD27   |
| CR_07640C_A | 2.59       | VFA1    |
| C1_11030W_A | 2.58 RPL82 |         |
| C3_01710C_A | 2.58 PPT1  | PPT1    |
| C6_00690W_A | 2.58       |         |
| CR_02110W_A | 2.58 MCM6  | MCM6    |
| C1_12380C_A | 2.57 WRS1  | WRS1    |
| C4_01500W_A | 2.57       | NCS6    |
| C6_00360C_A | 2.57       | MIX23   |
| C7_01660C_A | 2.57       | NEL1    |
| C2_00820W_A | 2.56       | MSS1    |
| C3_03110W_A | 2.56       | SNG1    |
| C4_03380C_A | 2.56 DAO2  |         |
| CR_02600W_A | 2.56       |         |
| C1_06210W_A | 2.55 BUD16 | BUD16   |
| C1_03240W_A | 2.54       |         |
| C1_12640W_A | 2.54       | SOM1    |
| C2_00870W_A | 2.54       |         |
| C2_07020C_A | 2.54       |         |
| C3_01850W_A | 2.54       | MRP1    |
| C1_10690W_A | 2.53       | IMO32   |
| C1_12350W_A | 2.53       | DIS3    |
| C3_02760C_A | 2.53       |         |
| C7_02460C_A | 2.53       | NPA3    |
| CR_03440W_A | 2.53       |         |
| C4_00940W_A | 2.52       | ELP6    |
| C5_00420C_A | 2.52 MRP17 | MRP17   |
| CR_04740C_A | 2.52 ADE6  | ADE6    |
| C1_02840W_A | 2.51 PDE2  | PDE2    |
| C2_10100W_A | 2.51 CWC22 | CWC22   |
| C3_02840W_A | 2.51       | POP5    |
| C3_06150W_A | 2.51       | YPR022C |
| C4_02880C_A | 2.51       | SDO1    |
| CR_02720C_A | 2.51 RPC31 | RPC31   |
| C3_05900W_A | 2.5        | YPQ1    |
| C4_01080W_A | 2.5 RAT1   | RAT1    |
| C4_02590C_A | 2.5        | SLX4    |
| C6_02290C_A | 2.5        | TYW1    |
| CR_03100W_A | 2.5 SMC5   | SMC5    |
| CR_05100W_A | 2.5        | BIR1    |
| C1_05090W_A | 2.49 TRY2  |         |
| C1_08890C_A | 2.49       | MSL1    |
| C1_10440W_A | 2.49       | YEL043W |
| C2_06000W_A | 2.49 LAS1  | LAS1    |
| C5_00320W_A | 2.49       | YDR115W |
| CR_10120C_A | 2.49       | RRG7    |
| C1_05010C_A | 2.48       | IZH1    |



|             |      |       |         |
|-------------|------|-------|---------|
| C1_07000W_A | 2.48 | MEF2  | MEF2    |
| C2_08560W_A | 2.48 | SMC2  | SMC2    |
| C6_02970C_A | 2.48 |       | PEX25   |
| C7_03790W_A | 2.48 | MRP7  | MRP7    |
| C7_03820C_A | 2.48 |       |         |
| CR_07000C_A | 2.48 | POL2  | POL2    |
| C2_09890W_A | 2.47 | SMM1  | SMM1    |
| C4_03550W_A | 2.47 | RAD2  | RAD2    |
| C5_04340W_A | 2.47 |       | MPD1    |
| C6_02270C_A | 2.47 | ALG11 | ALG11   |
| CR_01960C_A | 2.47 | MRS2  | MRS2    |
| C1_02900C_A | 2.46 |       | SPP382  |
| C1_03630W_A | 2.46 |       | TTI1    |
| C1_09970C_A | 2.46 | PDC2  | PDC2    |
| C2_01370C_A | 2.46 |       |         |
| CR_08450C_A | 2.46 |       |         |
| C1_04970W_A | 2.45 |       | CLU1    |
| C5_03390C_A | 2.45 | FUR1  | FUR1    |
| C7_04230W_A | 2.45 | NRG1  | NRG2    |
| CR_04920W_A | 2.45 |       | YDL119C |
| C1_10650W_A | 2.44 | APN2  | APN2    |
| C3_00840C_A | 2.44 |       | AIM11   |
| C4_00890W_A | 2.44 | ARO1  | ARO1    |
| C7_02930C_A | 2.44 |       | TSR4    |
| CR_01260W_A | 2.44 |       | TMN3    |
| C1_10920W_A | 2.43 |       | TFC6    |
| C2_02270C_A | 2.43 |       | MRPS8   |
| C2_09310C_A | 2.43 |       | GTF1    |
| C3_05860C_A | 2.43 |       | BMT5    |
| C5_02070C_A | 2.43 |       | ESF2    |
| C5_02490C_A | 2.43 | TIF5  | TIF5    |
| C1_00520W_A | 2.42 |       | YOR283W |
| C1_07340W_A | 2.42 |       | ISW1    |
| C1_07510W_A | 2.42 |       | YBL036C |
| C2_01420C_A | 2.42 |       |         |
| C3_06240C_A | 2.42 |       | MRPL39  |
| CR_01560W_A | 2.42 |       |         |
| C1_11790W_A | 2.41 |       | CDC8    |
| C2_05270W_A | 2.41 |       | KAP104  |
| C3_05390C_A | 2.41 | GPI1  | GPI1    |
| C3_05980C_A | 2.41 | FAA2  |         |
| C4_03910W_A | 2.41 | FGR28 |         |
| C5_04310W_A | 2.41 |       |         |
| C5_04740C_A | 2.41 | HYS2  | POL31   |
| C5_05320C_A | 2.41 | HIS1  | HIS1    |
| CR_07010W_A | 2.41 | MIS11 | MIS1    |
| CR_10580W_A | 2.41 | PRO1  | PRO1    |

|             |            |         |
|-------------|------------|---------|
| C1_02390W_A | 2.4        | PSO2    |
| C5_00250C_A | 2.4        | BER1    |
| C6_02280W_A | 2.4        | STB1    |
| CR_08190W_A | 2.4        |         |
| C1_10950C_A | 2.39       | RIO1    |
| C2_02160W_A | 2.39 SAM37 | SAM37   |
| C6_00560W_A | 2.39       | NDC1    |
| C1_04330W_A | 2.38 RPN4  | RPN4    |
| C2_09020W_A | 2.38 CDC47 | MCM7    |
| C3_01350C_A | 2.38 URA3  | URA3    |
| C5_02780W_A | 2.38       | SPT21   |
| CR_03230W_A | 2.38       | SQS1    |
| C1_07850C_A | 2.37       | DOC1    |
| C5_03400C_A | 2.37       | LSM7    |
| C5_05000C_A | 2.37       | ROG1    |
| CR_01440C_A | 2.37       |         |
| C2_04730W_A | 2.36       |         |
| C7_00950W_A | 2.36 YML6  | YML6    |
| CR_03750C_A | 2.36 PRP42 | PRP42   |
| C1_05650W_A | 2.35       | DAS2    |
| C1_08920W_A | 2.35       | RSM25   |
| C2_02680W_A | 2.35 PDR17 |         |
| C3_05930W_A | 2.35 CTA4  | OAF1    |
| C3_07800C_A | 2.35       | FCF2    |
| C4_02140C_A | 2.35 TIM10 | TIM10   |
| C5_02770W_A | 2.35 MSW1  | MSW1    |
| C6_04530C_A | 2.35       | RTT10   |
| C1_08520C_A | 2.34       | MRPL28  |
| C3_00560C_A | 2.34 SOF1  | SOF1    |
| C4_04820C_A | 2.34       | MRPL11  |
| C5_00260W_A | 2.34       | PRS1    |
| C5_01180W_A | 2.34 PUS4  | PUS4    |
| CR_09740W_A | 2.34       | RRP3    |
| C1_07690C_A | 2.33       | CSE1    |
| C1_08410C_A | 2.33 SAM4  | SAM4    |
| C2_09790W_A | 2.33       |         |
| CR_09010C_A | 2.33       | YHR112C |
| C1_07830C_A | 2.32       | ECO1    |
| C1_09880C_A | 2.32 BUD31 | BUD31   |
| C3_03330C_A | 2.32       | CLF1    |
| C3_06570C_A | 2.32 OPI3  | OPI3    |
| C4_07080C_A | 2.32       |         |
| C5_01100C_A | 2.32 CLN3  | CLN3    |
| C1_05270C_A | 2.31       | MHR1    |
| C1_11900C_A | 2.31       | UPF3    |
| C2_10360C_A | 2.31 HEM3  | HEM3    |
| C3_05890W_A | 2.31 TRM12 | TRM12   |

|             |             |         |
|-------------|-------------|---------|
| C3_06830C_A | 2.31        | YLR419W |
| C5_01700W_A | 2.31 MPRL36 | MRPL36  |
| C6_03330C_A | 2.31        | YPR097W |
| C7_01580W_A | 2.31 SMC6   | SMC6    |
| C7_01600W_A | 2.31        | OXA1    |
| C1_08750W_A | 2.3 YMC2    |         |
| C2_10770W_A | 2.3 RPC11   | RPC11   |
| C3_05310W_A | 2.3 USO6    |         |
| C4_03720C_A | 2.3         |         |
| C2_04640C_A | 2.29 SNU114 | SNU114  |
| C6_01630W_A | 2.29 TIF3   | TIF3    |
| CR_02540W_A | 2.29 CHO2   | CHO2    |
| C1_08420W_A | 2.28 GCR3   | STO1    |
| C5_02740W_A | 2.28        | CYC2    |
| C6_03380W_A | 2.28        | HEK2    |
| CR_00460C_A | 2.28        | IMP3    |
| CR_03360W_A | 2.28        | UTP11   |
| CR_06060W_A | 2.28        |         |
| C1_10070C_A | 2.27 MNN23  |         |
| C3_06640W_A | 2.27        |         |
| C5_03290C_A | 2.27        | MRP10   |
| CR_07720C_A | 2.27 CDC45  | CDC45   |
| CR_10570C_A | 2.27 YHB4   |         |
| C2_00200W_A | 2.26        | PRP18   |
| C1_05640C_A | 2.25 FAL1   | FAL1    |
| C1_12820C_A | 2.25        | RPB5    |
| C2_03560C_A | 2.25        | MRPL35  |
| C3_03560W_A | 2.25        | ICP55   |
| C4_00480W_A | 2.25 DUR4   |         |
| C4_04900W_A | 2.25 RPL30  | RPL30   |
| C4_05890W_A | 2.25        |         |
| C1_05360C_A | 2.24        | PAP2    |
| C1_07130C_A | 2.24        |         |
| C1_07910C_A | 2.24 MRPL3  | MRPL3   |
| C1_08210C_A | 2.24 MLT1   |         |
| C3_03000W_A | 2.24        |         |
| C4_06040W_A | 2.24        |         |
| C4_06110C_A | 2.24 TRP5   | TRP5    |
| C7_01250W_A | 2.24 ASC1   | ASC1    |
| CR_02550C_A | 2.24        | MTR3    |
| CR_06950C_A | 2.24 ATX1   | ATX1    |
| CR_07050C_A | 2.24 URA2   | URA2    |
| C1_06380C_A | 2.23        |         |
| C1_10610W_A | 2.23 FCY23  | TPN1    |
| C2_04980C_A | 2.23 CKA2   | CKA2    |
| C2_09300W_A | 2.23 MED18  | SRB5    |
| CR_04050C_A | 2.23 MEX67  | MEX67   |

|             |      |        |        |
|-------------|------|--------|--------|
| CR_08320W_A | 2.23 | ATS1   | ATS1   |
| CR_08520C_A | 2.23 |        |        |
| CR_10180W_A | 2.23 |        |        |
| C1_01380C_A | 2.22 | TRM2   | TRM2   |
| C1_05200C_A | 2.22 |        |        |
| C1_05470W_A | 2.22 | MTM1   | MTM1   |
| C1_09370W_A | 2.22 | CEF1   | CEF1   |
| C1_13520C_A | 2.22 | MCU1   |        |
| C4_00790C_A | 2.22 | MLH1   | MLH1   |
| C5_04720C_A | 2.22 |        | FOL2   |
| C7_02060W_A | 2.22 | LIG1   | TRL1   |
| C1_07890C_A | 2.21 | ADE5,7 | ADE5,7 |
| C1_09840C_A | 2.21 |        | STS1   |
| C1_12340C_A | 2.21 | MRPS9  | MRPS9  |
| C2_00650W_A | 2.21 |        |        |
| C2_08730W_A | 2.21 | MFG1   | MFG1   |
| C3_06200C_A | 2.21 | MMS21  | MMS21  |
| C4_06590W_A | 2.21 |        |        |
| C5_02270W_A | 2.21 | THR4   | THR4   |
| C5_02760W_A | 2.21 | CKB2   | CKB2   |
| CR_00410W_A | 2.21 | RTT109 | RTT109 |
| C3_00660W_A | 2.2  |        | RSE1   |
| C4_01470W_A | 2.2  |        | HRT3   |
| C5_03600W_A | 2.2  | MDJ1   | MDJ1   |
| C2_02400W_A | 2.19 | ECM3   | ECM3   |
| C2_07860W_A | 2.19 |        | CUE3   |
| C4_04700W_A | 2.19 | SSZ1   | SSZ1   |
| C4_05970W_A | 2.19 |        |        |
| C5_03280W_A | 2.19 | CAM1-1 |        |
| C6_00620W_A | 2.19 | FCA1   | FCY1   |
| C6_02240C_A | 2.19 | RPL10A | RPL1A  |
| C1_04530C_A | 2.18 |        | TRM44  |
| C1_10700C_A | 2.18 | NIT3   | NIT3   |
| C3_06300W_A | 2.18 | DOT1   | DOT1   |
| C4_03700W_A | 2.18 |        | VBA1   |
| CR_06490C_A | 2.18 | HSP60  | HSP60  |
| C1_09790C_A | 2.17 |        | AIR2   |
| C1_13050W_A | 2.17 | RPL14  | RPL14B |
| C2_06330C_A | 2.17 | AVT1   |        |
| C5_00030W_A | 2.17 |        | MRPL1  |
| C7_02940C_A | 2.17 | IFM1   | IFM1   |
| CR_02580W_A | 2.17 | PAN6   | PAN6   |
| CR_04010C_A | 2.17 | MRPL40 | MRPL40 |
| C1_04720W_A | 2.16 |        |        |
| C1_13840W_A | 2.16 |        | SMF2   |
| C2_01580W_A | 2.16 | REX2   | REX2   |
| C3_00090W_A | 2.16 | RPS24  | RPS24B |

|             |      |         |
|-------------|------|---------|
| C5_03850W_A | 2.16 |         |
| C6_02370C_A | 2.16 | RSM23   |
| CR_00830W_A | 2.16 | TAH1    |
| C2_04320W_A | 2.15 |         |
| C3_06230W_A | 2.15 | CYM1    |
| C4_03410W_A | 2.15 | MRPL22  |
| C5_00290W_A | 2.15 | DUS4    |
| CR_00430C_A | 2.15 | FRA2    |
| CR_03400W_A | 2.15 | ISM1    |
| CR_06680C_A | 2.15 | ECM32   |
| CR_08410W_A | 2.15 | REH1    |
| CR_09990W_A | 2.15 |         |
| C2_01820C_A | 2.14 | SNU71   |
| C3_04680W_A | 2.14 | RPP2B   |
| C4_02720C_A | 2.14 | SFK1    |
| C6_00640C_A | 2.14 | TFB4    |
| C6_03450C_A | 2.14 | NAM2    |
| CR_01150C_A | 2.14 | CTF18   |
| C2_02190C_A | 2.13 |         |
| C2_07270W_A | 2.13 |         |
| C2_09350W_A | 2.13 | TAZ1    |
| C3_02870C_A | 2.13 |         |
| C4_03140C_A | 2.13 | IKI1    |
| C1_04850C_A | 2.12 |         |
| C1_13960W_A | 2.12 | YBP1    |
| C3_01490W_A | 2.12 | RPS7A   |
| C5_03100C_A | 2.12 |         |
| C7_01210C_A | 2.12 | RPC37   |
| C1_00150C_A | 2.11 | RIM8    |
| C1_01910W_A | 2.11 | YER156C |
| C1_04000C_A | 2.11 | KTR4    |
| C2_06950C_A | 2.11 | ATP23   |
| C3_06630W_A | 2.11 | SLD3    |
| C4_02400C_A | 2.11 | MPS3    |
| C7_01450C_A | 2.11 | PRT1    |
| C1_13560W_A | 2.1  | SAE2    |
| C2_02120W_A | 2.1  | MTF1    |
| C2_08050C_A | 2.1  | ARN1    |
| C2_10810W_A | 2.1  | ECM2    |
| C3_01520C_A | 2.1  | TMA46   |
| C4_03800C_A | 2.1  | NUP84   |
| C4_05570C_A | 2.1  | TUB4    |
| C5_02670W_A | 2.1  | BUR2    |
| C5_02820C_A | 2.1  | MDE1    |
| C5_05250C_A | 2.1  | RSM7    |
| C7_01420W_A | 2.1  | GIR2    |
| C7_01680C_A | 2.1  |         |

|             |            |         |
|-------------|------------|---------|
| CR_07480W_A | 2.1        | YBR287W |
| C1_00740C_A | 2.09 SPE1  | SPE1    |
| C1_06820W_A | 2.09       |         |
| C2_03940C_A | 2.09 SCH9  | SCH9    |
| C3_04520C_A | 2.09 ADE2  | ADE2    |
| C4_05260W_A | 2.09       | IKI3    |
| C5_04120C_A | 2.09       |         |
| C1_01680C_A | 2.08       | FYV4    |
| C1_05380C_A | 2.08       | RIF1    |
| C1_09620C_A | 2.08       | FMC1    |
| C3_04140C_A | 2.08 EGD2  | EGD2    |
| C3_06310C_A | 2.08 ISW2  | ISW2    |
| C5_01140C_A | 2.08       | MSC6    |
| C6_04520W_A | 2.08 ILS1  | ILS1    |
| CR_06740W_A | 2.08       | SPC97   |
| CR_07940W_A | 2.08       |         |
| CR_08330W_A | 2.08       | OPI10   |
| C2_02510W_A | 2.07 PRS1  | PRS3    |
| C2_03130W_A | 2.07       | SFM1    |
| C3_00280C_A | 2.07 ULP3  | ULP2    |
| C4_07130W_A | 2.07       |         |
| C7_04150W_A | 2.07       | RTP1    |
| C1_08600C_A | 2.06 GCD6  | GCD6    |
| C2_01010W_A | 2.06 HGT8  |         |
| C2_04400W_A | 2.06       |         |
| C2_07260C_A | 2.06 DQD1  |         |
| C3_00830C_A | 2.06       | CDC9    |
| CR_08360C_A | 2.06 RPP2A | RPP2A   |
| C1_03370W_A | 2.05       | PAB1    |
| C1_08090C_A | 2.05 FUN12 | FUN12   |
| C1_13060C_A | 2.05       | MEF1    |
| C2_01860C_A | 2.05       | UTR4    |
| C2_05670C_A | 2.05       | SEN34   |
| C2_07160W_A | 2.05 SMF12 | SMF1    |
| C3_03070W_A | 2.05       |         |
| C3_04670C_A | 2.05 RPS15 | RPS15   |
| C3_06620W_A | 2.05 FUN31 | PSK1    |
| C4_02680C_A | 2.05       |         |
| C4_04130W_A | 2.05       | COA1    |
| C6_01070C_A | 2.05 CIP1  |         |
| C1_06530C_A | 2.04       | UBP12   |
| C1_08460C_A | 2.04 UPC2  | UPC2    |
| C1_13410W_A | 2.04 COX19 | COX19   |
| C1_14330W_A | 2.04       | SLM3    |
| C2_04340C_A | 2.04       | YDR248C |
| C2_07890W_A | 2.04 PRS5  | PRS5    |
| C3_06270C_A | 2.04       | RAD33   |

|             |      |       |         |
|-------------|------|-------|---------|
| C3_07150C_A | 2.04 | RPS12 | RPS12   |
| C4_01490W_A | 2.04 | NIP1  | NIP1    |
| C4_04390W_A | 2.04 |       | RPL22B  |
| CR_08370W_A | 2.04 | GSH2  | GSH2    |
| C1_08100W_A | 2.03 | DRG1  | RBG1    |
| C1_08670W_A | 2.03 | SWI6  | SWI6    |
| C2_06960W_A | 2.03 | SPE3  | SPE3    |
| C2_07820C_A | 2.03 | PHO86 | PHO86   |
| C2_08040C_A | 2.03 | RPS10 | RPS10A  |
| C3_03390C_A | 2.03 | YAH1  | YAH1    |
| C3_06600C_A | 2.03 |       | DML1    |
| C5_00280C_A | 2.03 |       | NUC1    |
| C5_04270C_A | 2.03 | SAH1  | SAH1    |
| CR_00480W_A | 2.03 | MRPL6 | MRPL6   |
| C1_02820W_A | 2.02 | LYS2  | LYS2    |
| C3_01030W_A | 2.02 | ARP9  | ARP9    |
| C3_07600W_A | 2.02 |       | YCR016W |
| C5_04840C_A | 2.02 |       | NOP19   |
| CR_03060W_A | 2.02 | ARC1  | ARC1    |
| C2_00620C_A | 2.01 |       | EFM3    |
| C2_09290W_A | 2.01 |       | VMA21   |
| C3_05240C_A | 2.01 | RPL8B | RPL8B   |
| C4_01680W_A | 2.01 | TOA2  | TOA2    |
| C5_01130W_A | 2.01 | CYC3  | CYC3    |
| C6_03350C_A | 2.01 | ARP4  | ARP4    |
| CR_00510C_A | 2.01 | ADE1  | ADE1    |
| CR_04780W_A | 2.01 | RPB8  | RPB8    |
| CR_07360W_A | 2.01 | PIF1  | PIF1    |
| CR_08090W_A | 2.01 | SSB1  | SSB2    |
| C1_13010W_A | 2    |       | PET309  |
| C2_00280C_A | 2    |       | CWC24   |
| C2_01220W_A | 2    |       | NIC96   |
| C4_06450W_A | 2    |       | IES6    |
| C5_01930W_A | 2    |       | PRP9    |
| CR_01320C_A | 2    |       | YGR125W |

#### S45 vs B45 Upregulated genes

| Gene I D    | Fold change | Standard gene nan | Name of <i>S. cerevisiae</i> ortholog(s) |
|-------------|-------------|-------------------|------------------------------------------|
| C5_03440W_A | 45.64       |                   |                                          |
| CR_02920C_A | 33.65       | AQY1              | AQY1                                     |
| C1_04750W_A | 24.32       | IFE1              | BDH2                                     |
| C2_05070W_A | 22.96       | FRE9              |                                          |
| C1_06740C_A | 22.68       | NOP6              | NOP6                                     |
| C4_04100C_A | 21.24       | ECM1              | ECM1                                     |
| C4_05010W_A | 21.10       |                   | RSA4                                     |
| C2_04120C_A | 19.39       |                   | NOP12                                    |
| C3_01430W_A | 19.12       |                   | RRT14                                    |

|             |       |       |         |
|-------------|-------|-------|---------|
| C6_04130C_A | 18.99 | ALS4  |         |
| C2_07960C_A | 18.54 | NSA1  | NSA1    |
| C1_05000W_A | 18.47 | RHD1  |         |
| C1_06760C_A | 18.34 |       | IPI3    |
| CR_03570C_A | 18.31 | YVH1  | YVH1    |
| CR_06300C_A | 17.68 | FGR50 |         |
| C2_05620W_A | 17.64 | KTI11 | KTI11   |
| C7_03540C_A | 17.52 | ENP2  | ENP2    |
| C1_12440W_A | 17.45 |       | REX4    |
| C6_03250W_A | 17.09 | BMT4  |         |
| C2_04570W_A | 16.88 |       | EBP2    |
| C5_03530C_A | 16.70 |       | COQ10   |
| CR_04110W_A | 16.30 |       | NAF1    |
| C4_04840C_A | 16.09 | AGP3  | AGP3    |
| C5_04030W_A | 15.51 |       |         |
| C2_05090W_A | 15.30 | MAK5  | MAK5    |
| C2_06460W_A | 15.11 | RTA3  |         |
| C1_00900W_A | 14.94 | RRS1  | RRS1    |
| C7_00690W_A | 14.94 | NOP15 | NOP15   |
| C3_03650W_A | 14.87 | HBR3  | NOB1    |
| CR_08500W_A | 14.54 |       | SYO1    |
| C2_06850W_A | 14.24 |       | SLX9    |
| C7_02340C_A | 13.98 |       | TRM82   |
| C1_12310C_A | 13.49 | CSI2  | BRX1    |
| C1_02450C_A | 13.45 |       | BUD20   |
| C1_04040C_A | 13.39 |       | NOP9    |
| C1_11420W_A | 13.25 | KRR1  | KRR1    |
| C7_01030C_A | 13.24 |       | RRP12   |
| C3_02040C_A | 13.07 |       | LOC1    |
| CR_05380C_A | 12.83 | YCP4  | YCP4    |
| C3_06760W_A | 12.42 |       | RRP1    |
| CR_02980C_A | 12.31 | SRP40 | SRP40   |
| C2_05160C_A | 12.30 |       | PUF6    |
| CR_09730C_A | 12.07 | SSF1  | SSF1    |
| CR_03370C_A | 11.92 | KTI12 | KTI12   |
| CR_05520W_A | 11.85 | NOC2  | NOC2    |
| CR_08490W_A | 11.80 | TSR1  | TSR1    |
| C7_04190C_A | 11.62 | UTP18 | UTP18   |
| C7_01200C_A | 11.53 | DBP7  | DBP7    |
| C1_10030W_A | 11.46 | DBP3  | DBP3    |
| C3_01560W_A | 11.35 |       | PRP43   |
| CR_10240W_A | 11.31 | UTP5  | UTP5    |
| CR_05660W_A | 11.17 | SDA1  | SDA1    |
| CR_01410C_A | 11.10 |       | YNL035C |
| CR_04170W_A | 11.09 |       | NOP2    |
| C3_04510W_A | 11.00 |       | YBL028C |
| C3_02020W_A | 10.95 |       | MRD1    |



|             |       |       |           |
|-------------|-------|-------|-----------|
| C6_04160C_A | 10.56 | SPB1  | SPB1      |
| C1_03840W_A | 10.54 |       |           |
| C3_05170W_A | 10.45 | WOR2  |           |
| C1_12420C_A | 10.42 |       |           |
| C5_01610W_A | 10.40 |       | DEG1      |
| C6_01170W_A | 10.34 | CIC1  | CIC1      |
| C1_13370W_A | 10.33 |       | YDR161W   |
| C3_00370C_A | 10.23 | BUD21 | BUD21     |
| C2_00860C_A | 10.17 |       |           |
| C1_10970W_A | 10.13 |       | ESF1      |
| C2_07340W_A | 10.09 | NOC4  | NOC4      |
| CR_07030C_A | 10.09 |       | RRP36     |
| C3_07300W_A | 10.03 | NOP13 | NOP13     |
| C3_06160C_A | 9.94  |       |           |
| C4_00510C_A | 9.94  | RLP24 | RLP24     |
| C3_02130W_A | 9.92  | UTP4  | UTP4      |
| C6_01180C_A | 9.88  | EBP1  |           |
| CR_05630W_A | 9.75  | DBP8  | DBP8      |
| C1_09510W_A | 9.69  | YTM1  | YTM1      |
| CR_04240C_A | 9.51  |       | KRE33     |
| C1_04390C_A | 9.46  | NOP4  | NOP4      |
| CR_04750W_A | 9.43  |       | YLR363W-A |
| C1_09330W_A | 9.41  |       | TMA16     |
| C6_02230W_A | 9.36  |       | LSG1      |
| C1_03060C_A | 9.34  | TSR2  | TSR2      |
| C3_05160C_A | 9.33  |       | DBP10     |
| C2_09320C_A | 9.31  | PES1  | NOP7      |
| C5_03250W_A | 9.24  | RMS1  | RKM4      |
| C4_03830W_A | 9.22  |       | TRM3      |
| C1_08070W_A | 9.20  | CDR4  |           |
| C5_01430C_A | 9.19  |       | RBA50     |
| C7_02240W_A | 9.12  | FMP45 | FMP45     |
| C6_02360W_A | 9.10  | NIP7  | NIP7      |
| C1_03230C_A | 8.97  | ARX1  | ARX1      |
| C6_03210C_A | 8.93  |       | RPC34     |
| CR_07060C_A | 8.93  | CRZ2  |           |
| C3_06030W_A | 8.81  | NOG1  | NOG1      |
| C1_03830C_A | 8.79  |       | CSL4      |
| C5_02550C_A | 8.79  | UTP13 | UTP13     |
| CR_06720W_A | 8.75  | NMD3  | NMD3      |
| C2_00410C_A | 8.70  |       | ECM16     |
| C2_09660W_A | 8.66  |       | NOP16     |
| C1_05050C_A | 8.64  | RRP6  | RRP6      |
| C2_04080W_A | 8.59  |       |           |
| CR_02030C_A | 8.55  |       | RCM1      |
| C5_01600C_A | 8.50  | SPB4  | SPB4      |
| C7_04230W_A | 8.44  | NRG1  | NRG2      |

|             |             |         |
|-------------|-------------|---------|
| C7_00570W_A | 8.43 RPA135 | RPA135  |
| C1_06570W_A | 8.38 ANT1   | ANT1    |
| C3_01000W_A | 8.37 BMS1   | BMS1    |
| C3_00800W_A | 8.35 MIH1   | MIH1    |
| C3_06380W_A | 8.31 NSA2   | NSA2    |
| CR_10550W_A | 8.31 DRS1   | DRS1    |
| C5_04750C_A | 8.27 HAS1   | HAS1    |
| C3_04560W_A | 8.26 MAK21  | MAK21   |
| C4_06720W_A | 8.25 NOP1   | NOP1    |
| C1_07880C_A | 8.21 GCS1   | GSH1    |
| C6_01890C_A | 8.14        | DBP9    |
| C1_00160C_A | 8.10        | NSR1    |
| C6_04380W_A | 7.98 ALS2   |         |
| C4_04810C_A | 7.93        | TRM8    |
| C1_11000C_A | 7.88        | CGR1    |
| C2_02540W_A | 7.87        | RRP5    |
| CR_02420W_A | 7.82        | UTP23   |
| C1_05480C_A | 7.75        |         |
| C2_08200W_A | 7.74        |         |
| C4_06210C_A | 7.74        | NUG1    |
| C1_06440C_A | 7.73        |         |
| C1_13480W_A | 7.73 HSP70  | SSA4    |
| C4_00810C_A | 7.73        | QRI7    |
| C6_01440C_A | 7.72 FRP5   |         |
| CR_06550C_A | 7.71        |         |
| C2_10240W_A | 7.70 GPD1   | GPD1    |
| C1_01110C_A | 7.69 ZPR1   | ZPR1    |
| C1_07950C_A | 7.62        | RRP17   |
| C2_06700W_A | 7.61 AMO2   |         |
| C3_02350W_A | 7.58        | KRI1    |
| CR_05620C_A | 7.50 MTG2   | MTG2    |
| C2_08480W_A | 7.46 RRP8   | RRP8    |
| CR_03940W_A | 7.45        | IPI1    |
| C1_08040W_A | 7.42        |         |
| C6_00480C_A | 7.42 FET3   |         |
| CR_10470C_A | 7.41        | BFR2    |
| C2_09500W_A | 7.37        | DUS1    |
| C4_02260C_A | 7.34        | YMR310C |
| C1_09710C_A | 7.26        | UTP7    |
| C7_01520W_A | 7.25 FLU1   | TPO1    |
| CR_03650W_A | 7.24 SGD1   | SGD1    |
| C4_02720C_A | 7.21        | SFK1    |
| CR_03550W_A | 7.21 NCS2   | NCS2    |
| C2_03690C_A | 7.17        |         |
| C2_05080C_A | 7.15        | BMT2    |
| C6_00370C_A | 7.11 NOP5   | NOP58   |
| C1_07990C_A | 7.10        |         |

|             |             |         |
|-------------|-------------|---------|
| C7_00160C_A | 7.01        | ALB1    |
| CR_09370W_A | 6.95 ELF1   | NEW1    |
| C2_05230C_A | 6.88 RPF2   | RPF2    |
| CR_08940W_A | 6.86        | GCD14   |
| C5_03920C_A | 6.83        | FCF1    |
| C1_14080W_A | 6.81        | UTP10   |
| CR_02520W_A | 6.80 RPC19  | RPC19   |
| C2_00070C_A | 6.78 MPP10  | MPP10   |
| C5_01060C_A | 6.78 BUD23  | BUD23   |
| C6_03710W_A | 6.77 ALS9   | FLO1    |
| C2_02420C_A | 6.75        | DUS3    |
| C4_04500C_A | 6.66        | EFM5    |
| C3_05230W_A | 6.45 SAP3   |         |
| C7_04090C_A | 6.42        |         |
| C2_01050W_A | 6.36        |         |
| C2_09990C_A | 6.36 YOR1   | YOR1    |
| CR_00680W_A | 6.33 BUD22  | BUD22   |
| C1_12680W_A | 6.30        | RRB1    |
| C1_14160W_A | 6.30        | RKM3    |
| C1_08810C_A | 6.29 MSS116 | MSS116  |
| C2_09380W_A | 6.27 RRP15  | RRP15   |
| C6_01420C_A | 6.26        |         |
| CR_09800C_A | 6.20        | UTP14   |
| C1_04330W_A | 6.15 RPN4   | RPN4    |
| C4_04320W_A | 6.15 FRE10  |         |
| CR_03760W_A | 6.15        | NNT1    |
| C3_04370C_A | 6.10        | URB2    |
| C1_09550W_A | 6.09        |         |
| C4_05650W_A | 6.09        | FAF1    |
| C1_01150C_A | 6.06        | PPM2    |
| C1_01750W_A | 6.05        | YCR023C |
| C3_05570W_A | 6.00 QDR2   |         |
| C5_00910C_A | 6.00 TRX2   |         |
| C3_06370C_A | 5.95        | LCP5    |
| C4_02850W_A | 5.91        | ELP2    |
| CR_01950W_A | 5.86        | RPA43   |
| C3_06390W_A | 5.85        |         |
| C5_05340W_A | 5.85        | SQT1    |
| CR_05390W_A | 5.83 PST3   | PST2    |
| C1_06810W_A | 5.77 CAT1   | CTA1    |
| C2_10740C_A | 5.75        | EMW1    |
| C5_02120C_A | 5.75 RIX7   | RIX7    |
| CR_10410C_A | 5.72        | PNO1    |
| CR_00900W_A | 5.69 TRM1   | TRM1    |
| C3_01680C_A | 5.68        | YDL183C |
| CR_03360W_A | 5.67        | UTP11   |
| C1_13870W_A | 5.66 MET3   | MET3    |

|             |            |         |
|-------------|------------|---------|
| C2_08000C_A | 5.66 KRE30 | ARB1    |
| C1_03390W_A | 5.63 EHT1  | EHT1    |
| C2_06480W_A | 5.63       | TRM10   |
| C2_10270W_A | 5.63 PUS7  | PUS7    |
| C3_04200W_A | 5.63 AFP99 |         |
| C4_01450W_A | 5.60 PWP1  | PWP1    |
| C3_07070C_A | 5.55       |         |
| C4_06710W_A | 5.54       |         |
| C3_05140C_A | 5.53       | TRM11   |
| C1_01160C_A | 5.49       | RRP40   |
| C2_05660W_A | 5.48 PNG2  |         |
| C4_02050W_A | 5.48 HGH1  | HGH1    |
| C2_10810W_A | 5.45       | ECM2    |
| C3_03470W_A | 5.44       | UGA2    |
| CR_00080W_A | 5.41 MIS12 |         |
| C3_05460W_A | 5.35       |         |
| C1_10360C_A | 5.32       | YCR061W |
| CR_07470W_A | 5.32       | DSS4    |
| CR_07750C_A | 5.32       | DBP6    |
| C2_06890C_A | 5.22       |         |
| C4_03110W_A | 5.21       | DNF3    |
| C5_00920W_A | 5.17       | DIB1    |
| C2_07450C_A | 5.16 RCL1  | RCL1    |
| C6_04530C_A | 5.09       | RTT10   |
| CR_07480W_A | 5.06       | YBR287W |
| C6_01040C_A | 5.04       | DHR2    |
| C4_04470W_A | 5.00 SAP10 |         |
| CR_07950W_A | 4.98 IMP4  | IMP4    |
| C7_04140C_A | 4.97       | YAR1    |
| C2_10100W_A | 4.96 CWC22 | CWC22   |
| C4_02990C_A | 4.96 GST2  |         |
| C5_00680W_A | 4.96 RMT2  | RMT2    |
| C1_01220C_A | 4.95       |         |
| C4_07050W_A | 4.95 YDC1  | YDC1    |
| CR_04160C_A | 4.94       | GCD10   |
| CR_01780W_A | 4.93       | BMT6    |
| CR_08340W_A | 4.93 CYS3  | CYS3    |
| CR_00460C_A | 4.92       | IMP3    |
| CR_06590C_A | 4.92 RGS2  | RGS2    |
| C2_00080C_A | 4.91 FAV3  |         |
| C2_08840W_A | 4.91       | TRM112  |
| C3_02180C_A | 4.90       | DYS1    |
| C6_02350C_A | 4.87       | PUS1    |
| C2_08820C_A | 4.86 SPO11 | SPO11   |
| C4_06620C_A | 4.86       |         |
| C4_03840C_A | 4.85 RRP42 | RRP42   |
| C4_02080W_A | 4.84       |         |

|             |             |           |
|-------------|-------------|-----------|
| C1_05230W_A | 4.82        | RPC25     |
| CR_08890C_A | 4.81 ASR2   |           |
| C2_07020C_A | 4.80        |           |
| C4_00750C_A | 4.78        |           |
| C3_01150C_A | 4.74        | APD1      |
| C4_00690C_A | 4.74        | DPH2      |
| C6_02940C_A | 4.73        |           |
| C1_13940W_A | 4.72 SIM1   | UTH1      |
| C3_04860W_A | 4.72        | SFP1      |
| CR_06120W_A | 4.71 RPL7   | RLP7      |
| C1_10620W_A | 4.67        | CBF5      |
| C2_05340C_A | 4.67 RPC40  | RPC40     |
| CR_03710C_A | 4.67        |           |
| C1_08870C_A | 4.66 JIP5   | JIP5      |
| C2_02980C_A | 4.65 DLD1   |           |
| CR_06680C_A | 4.64        | ECM32     |
| C1_12570C_A | 4.60        | ELP4      |
| C4_03900C_A | 4.60 RAM1   | RAM1      |
| C7_00330C_A | 4.59        | SUA5      |
| C3_00330W_A | 4.57 UTP8   | UTP8      |
| C6_03180C_A | 4.56        | ALY2      |
| CR_10750C_A | 4.55        | YCR087C-A |
| C1_02800W_A | 4.54        |           |
| CR_06330C_A | 4.53        | YML108W   |
| C1_02190W_A | 4.51 ABP140 | ABP140    |
| C2_01070W_A | 4.51        | RPA49     |
| C4_05700W_A | 4.49 ZCF5   |           |
| C3_07340W_A | 4.47 GCY1   | GCY1      |
| CR_05550C_A | 4.46        | RET1      |
| C2_06000W_A | 4.41 LAS1   | LAS1      |
| C3_06830C_A | 4.40        | YLR419W   |
| C6_03390W_A | 4.40        | DIC1      |
| C1_09810W_A | 4.39        | YGR210C   |
| CR_09950C_A | 4.39 SIK1   | NOP56     |
| C4_04140W_A | 4.37        |           |
| C5_00310C_A | 4.36        |           |
| C4_06790W_A | 4.35        | GPN3      |
| CR_02530W_A | 4.35 DBP2   | DBP2      |
| C1_00560W_A | 4.33 CNS1   | CNS1      |
| CR_07820W_A | 4.32        |           |
| C2_07130C_A | 4.31 RCK2   | RCK2      |
| C5_03470C_A | 4.30        |           |
| C6_02420W_A | 4.30        | PGC1      |
| C7_01670W_A | 4.30        |           |
| C7_01360C_A | 4.25        | ZIM17     |
| C2_07920W_A | 4.24        | RRT2      |
| C6_02770W_A | 4.24 MRT4   | MRT4      |

|             |      |        |         |
|-------------|------|--------|---------|
| C3_03450C_A | 4.22 | BMT7   |         |
| C4_03190W_A | 4.21 |        |         |
| C2_09260C_A | 4.20 | GLO2   | GLO2    |
| C1_13130C_A | 4.18 |        |         |
| C2_05960C_A | 4.17 |        |         |
| C3_05800W_A | 4.17 |        | SEN54   |
| C1_12670C_A | 4.15 |        | PRP6    |
| C3_07750W_A | 4.15 | UTP9   | UTP9    |
| C4_03350C_A | 4.15 |        |         |
| C1_05510C_A | 4.13 | RPS27A | RPS27A  |
| C1_05840W_A | 4.13 | PRN1   |         |
| C4_00970C_A | 4.13 | MDN1   | MDN1    |
| C3_01520C_A | 4.12 |        | TMA46   |
| C6_04320C_A | 4.12 |        |         |
| C2_03830W_A | 4.11 |        | DPH6    |
| C1_04130W_A | 4.08 | ERB1   | ERB1    |
| C2_03040W_A | 4.08 | PLC2   |         |
| C4_02300W_A | 4.04 | HOS3   | HOS3    |
| C1_01530C_A | 4.03 |        | YDR341C |
| C1_09490C_A | 4.03 | GUA1   | GUA1    |
| C1_12600C_A | 4.00 | CHR1   | ROK1    |
| C2_05970C_A | 4.00 | TES1   |         |
| C3_07400W_A | 3.99 |        | TRM7    |
| C4_03740W_A | 3.99 |        | RRP4    |
| C5_03010W_A | 3.97 |        | SNU66   |
| CR_09960C_A | 3.97 | UGA3   | UGA3    |
| CR_00740C_A | 3.96 | BMT3   |         |
| C1_05520W_A | 3.95 |        |         |
| C1_07330W_A | 3.94 | RME1   | RME1    |
| C6_04050W_A | 3.94 |        |         |
| C4_01080W_A | 3.93 | RAT1   | RAT1    |
| C1_06770W_A | 3.92 |        | YNL181W |
| C2_06930C_A | 3.90 |        |         |
| C4_06470W_A | 3.90 |        | YMR295C |
| C6_01870C_A | 3.90 |        | YHK8    |
| C1_01910W_A | 3.88 |        | YER156C |
| C1_06540C_A | 3.86 |        | RRP43   |
| C4_06390W_A | 3.86 | SOU1   |         |
| C6_04200C_A | 3.86 |        |         |
| C6_00530C_A | 3.85 |        | SME1    |
| C1_11700C_A | 3.84 | MRF1   |         |
| C5_02010C_A | 3.84 |        | BUD27   |
| C2_06470W_A | 3.83 | RTA2   | RSB1    |
| C1_02090C_A | 3.82 |        | DRN1    |
| C1_13720W_A | 3.82 |        | KEL3    |
| C3_00100W_A | 3.82 |        | YJU2    |
| C5_02280C_A | 3.81 |        | CTR86   |

|             |            |         |
|-------------|------------|---------|
| C1_05360C_A | 3.80       | PAP2    |
| C1_10780C_A | 3.80 HNT1  | HNT1    |
| C2_02510W_A | 3.79 PRS1  | PRS3    |
| C2_07300C_A | 3.79 RPA12 | RPA12   |
| C3_05930W_A | 3.78 CTA4  | OAF1    |
| CR_02890C_A | 3.78       | RPC82   |
| C1_08630W_A | 3.76       | MTF2    |
| C7_02490W_A | 3.76 PEX1  | PEX1    |
| CR_00670C_A | 3.76       | TRM13   |
| C5_04350C_A | 3.74       | FSH3    |
| C2_04820W_A | 3.73       | MRM1    |
| C3_03870C_A | 3.72 SAP9  | YPS1    |
| CR_08100C_A | 3.72 RIO2  | RIO2    |
| CR_09140C_A | 3.71       | MSC1    |
| C6_03610W_A | 3.70 FGR17 |         |
| C5_01480W_A | 3.69 FYV5  | FYV7    |
| C6_02910W_A | 3.69 POP4  | POP4    |
| C1_10110W_A | 3.68       |         |
| CR_07160C_A | 3.68       |         |
| C4_02870C_A | 3.67 ZUO1  | ZUO1    |
| C6_00290W_A | 3.67       |         |
| C1_11910W_A | 3.66       | THP1    |
| C7_02460C_A | 3.66       | NPA3    |
| CR_00800C_A | 3.66 PWP2  | PWP2    |
| C1_05330C_A | 3.63       | YDR306C |
| CR_04920W_A | 3.63       | YDL119C |
| C1_13330C_A | 3.62       | SPE4    |
| C4_00540C_A | 3.59 NMD5  | NMD5    |
| C3_00560C_A | 3.58 SOF1  | SOF1    |
| C2_02740C_A | 3.57 HPT1  | HPT1    |
| C3_06850W_A | 3.56 FCR1  |         |
| C5_04990W_A | 3.56       | RPC17   |
| C6_03630W_A | 3.56 PAD1  | PAD1    |
| C2_00650W_A | 3.52       |         |
| C1_05640C_A | 3.47 FAL1  | FAL1    |
| C2_01010W_A | 3.45 HGT8  |         |
| C4_06410W_A | 3.44       | SYF1    |
| C1_11200W_A | 3.43       |         |
| CR_01700C_A | 3.42       | PRP24   |
| C3_07100C_A | 3.41       | NGR1    |
| C4_00490W_A | 3.41       |         |
| CR_10690W_A | 3.41 POP3  | POP3    |
| C6_04260C_A | 3.38       | JLP2    |
| C2_03940C_A | 3.37 SCH9  | SCH9    |
| C7_03930C_A | 3.37 MAM33 | MAM33   |
| C1_01030W_A | 3.35 HMT1  | HMT1    |
| C1_04350C_A | 3.35       |         |

|             |      |         |
|-------------|------|---------|
| C4_06990W_A | 3.35 |         |
| C1_11550W_A | 3.33 | GAR1    |
| C2_02900W_A | 3.33 |         |
| C4_00940W_A | 3.32 | ELP6    |
| C1_12760W_A | 3.31 | BCP1    |
| C2_06390C_A | 3.31 | IMH3    |
| C2_09000C_A | 3.30 |         |
| C4_07060W_A | 3.30 | RPO31   |
| C6_02560W_A | 3.28 | YMR315W |
| C2_06750C_A | 3.27 |         |
| C3_01230C_A | 3.27 |         |
| C3_02460C_A | 3.27 | PHA2    |
| C4_04550C_A | 3.27 | OMA1    |
| C2_01060C_A | 3.26 | JJJ3    |
| C3_07600W_A | 3.26 | YCR016W |
| C3_07670W_A | 3.26 | YDR090C |
| C4_07140W_A | 3.26 | UPS2    |
| C7_00880C_A | 3.26 |         |
| CR_06770C_A | 3.26 |         |
| CR_06840W_A | 3.26 | UTP25   |
| C2_07410W_A | 3.25 | YMR210W |
| C1_06120C_A | 3.24 |         |
| CR_09150W_A | 3.24 |         |
| C2_07070W_A | 3.23 | ZTA1    |
| C6_03840C_A | 3.23 | SNQ2    |
| C3_04380C_A | 3.21 | SNU13   |
| CR_08020C_A | 3.21 | NOP10   |
| C1_00990C_A | 3.20 | NMA111  |
| C1_05210C_A | 3.19 | YNR040W |
| C2_02600C_A | 3.18 | FGR22   |
| C2_00880W_A | 3.17 |         |
| C7_00380W_A | 3.17 | PET8    |
| C3_05070W_A | 3.16 | CEM1    |
| C1_12140W_A | 3.15 |         |
| C3_06720W_A | 3.15 | PRP5    |
| C1_07500C_A | 3.14 | LHP1    |
| C1_07710C_A | 3.13 | ADE4    |
| C1_04740W_A | 3.12 | LPG20   |
| C1_07140C_A | 3.12 | RIA1    |
| C5_01110W_A | 3.12 | OTU2    |
| CR_02060W_A | 3.12 |         |
| C2_03130W_A | 3.11 | SFM1    |
| C4_06540W_A | 3.11 | MNN4    |
| C5_04580C_A | 3.11 | VPS25   |
| C3_05380W_A | 3.10 | YJL163C |
| C1_00340W_A | 3.08 | HBR1    |
| C3_06230W_A | 3.08 | CYM1    |



|             |      |        |         |
|-------------|------|--------|---------|
| C5_01180W_A | 3.08 | PUS4   | PUS4    |
| C7_00490C_A | 3.08 |        | TAE1    |
| CR_04420C_A | 3.08 | RBR2   | TIP1    |
| C5_03360W_A | 3.07 | RPO26  | RPO26   |
| C7_03230C_A | 3.07 |        |         |
| CR_09670C_A | 3.07 |        | YJL068C |
| C2_01410C_A | 3.05 | CLB2   | CLB2    |
| C2_04230W_A | 3.05 | BAT21  | BAT2    |
| C6_00590W_A | 3.05 | SLY41  | SLY41   |
| C1_09170W_A | 3.04 | CTA8   | HSF1    |
| C6_00760W_A | 3.04 |        | FES1    |
| C7_02100W_A | 3.04 |        |         |
| C1_02840W_A | 3.03 | PDE2   | PDE2    |
| C3_00750W_A | 3.03 | LYS144 |         |
| C3_05860C_A | 3.03 |        | BMT5    |
| C4_06780C_A | 3.03 | OYE32  |         |
| C5_00280C_A | 3.03 |        | NUC1    |
| C4_01010C_A | 3.02 | DAG7   |         |
| C6_04300W_A | 3.02 |        |         |
| CR_08580C_A | 3.02 |        |         |
| C2_00170C_A | 3.01 |        | TCD2    |
| C2_01880C_A | 3.01 | ZCF6   |         |
| C7_03210W_A | 3.01 |        |         |
| C1_12350W_A | 3.00 |        | DIS3    |
| C4_03150W_A | 3.00 |        | HSH155  |
| C5_03390C_A | 3.00 | FUR1   | FUR1    |
| C5_03640W_A | 3.00 |        |         |
| C6_03200W_A | 2.99 |        |         |
| CR_05570C_A | 2.99 | RNR3   |         |
| C1_05650W_A | 2.97 |        | DAS2    |
| C2_09900C_A | 2.97 | TIM23  | TIM23   |
| C3_04520C_A | 2.96 | ADE2   | ADE2    |
| C1_00220W_A | 2.95 | PHR2   | GAS1    |
| C1_09440W_A | 2.95 |        | PPA2    |
| C4_01280C_A | 2.95 |        | PRP21   |
| CR_05990C_A | 2.93 | SFL1   | SFL1    |
| C1_01610C_A | 2.92 |        |         |
| C5_03700C_A | 2.92 |        | DPH5    |
| CR_06980W_A | 2.92 |        | LTO1    |
| CR_08330W_A | 2.89 |        | OPI10   |
| CR_08920W_A | 2.89 |        |         |
| C2_07360W_A | 2.88 |        | TGS1    |
| C4_05770C_A | 2.88 | CFL1   |         |
| C5_03970W_A | 2.88 |        |         |
| C7_00310C_A | 2.88 |        |         |
| C1_07690C_A | 2.87 |        | CSE1    |
| C2_02710C_A | 2.87 |        | RRP7    |

|             |             |         |
|-------------|-------------|---------|
| C1_06560W_A | 2.86        | YGR117C |
| C7_02930C_A | 2.86        | TSR4    |
| C4_00480W_A | 2.84 DUR4   |         |
| C4_01470W_A | 2.84        | HRT3    |
| C3_07760C_A | 2.83        |         |
| C5_02070C_A | 2.83        | ESF2    |
| C2_02960C_A | 2.82        | EFM2    |
| C2_03020C_A | 2.82        | YJL016W |
| C4_03050C_A | 2.82        | CPS1    |
| C6_01300W_A | 2.82        | CST26   |
| CR_03110W_A | 2.82        | MSE1    |
| C2_03030W_A | 2.81 LIG4   | DNL4    |
| CR_06570C_A | 2.81        |         |
| C4_00360C_A | 2.80 RCH1   | YMR034C |
| CR_04300W_A | 2.80        | NCL1    |
| C4_04700W_A | 2.79 SSZ1   | SSZ1    |
| CR_07640C_A | 2.79        | VFA1    |
| C1_13470W_A | 2.78 KNS1   | KNS1    |
| C3_00950C_A | 2.77        | CPR7    |
| C3_07550C_A | 2.77        | GEP3    |
| C4_07030W_A | 2.77 MET16  | MET16   |
| CR_03750C_A | 2.77 PRP42  | PRP42   |
| C1_03200C_A | 2.76 ARO80  | ARO80   |
| C1_13270W_A | 2.75        | POF1    |
| C3_04480C_A | 2.75 RAS2   |         |
| C1_04140W_A | 2.74 IFD6   |         |
| C3_00480C_A | 2.74 DOT5   | DOT5    |
| C1_00500C_A | 2.73 GLO1   | GLO1    |
| C1_01240W_A | 2.73 IFD3   |         |
| C1_04720W_A | 2.73        |         |
| CR_03230W_A | 2.73        | SQS1    |
| C1_09610W_A | 2.72        |         |
| C6_01000C_A | 2.72        | AEP1    |
| C1_06380C_A | 2.71        |         |
| C1_06800W_A | 2.71        | RAI1    |
| C2_07000W_A | 2.71        | YCR051W |
| C3_05980C_A | 2.71 FAA2   |         |
| C5_02430W_A | 2.71 ZCF22  |         |
| CR_10270C_A | 2.71 AHA1   | AHA1    |
| C5_00260W_A | 2.70        | PRS1    |
| C1_03400W_A | 2.69        | ART5    |
| C2_04640C_A | 2.69 SNU114 | SNU114  |
| C3_03680W_A | 2.69        | DPL1    |
| CR_02720C_A | 2.69 RPC31  | RPC31   |
| CR_05750W_A | 2.69        |         |
| CR_06000W_A | 2.69 SOK1   | SOK1    |
| C1_09400C_A | 2.68 FTH1   | FTH1    |

|             |             |         |
|-------------|-------------|---------|
| C2_08620W_A | 2.68        | YPL191C |
| C5_03860W_A | 2.68 HAM1   | HAM1    |
| C1_00150C_A | 2.67 RIM8   | RIM8    |
| C1_01900C_A | 2.67        | TMA64   |
| C1_11220C_A | 2.67 TIM50  | TIM50   |
| C2_03200W_A | 2.66 PRP3   | PRP3    |
| C3_03550C_A | 2.66 ULP1   |         |
| C6_02500C_A | 2.66 GCV1   | GCV1    |
| C6_01690W_A | 2.65 ACF2   | ACF2    |
| C1_02620C_A | 2.64 HOM6   | HOM6    |
| C4_01490W_A | 2.64 NIP1   | NIP1    |
| C1_05220C_A | 2.63        |         |
| C3_07380W_A | 2.63        | YBR062C |
| C5_04570C_A | 2.63 URA7   | URA7    |
| CR_07250C_A | 2.63        |         |
| C1_03790C_A | 2.62        | FPR3    |
| C3_02570W_A | 2.62        | YIL108W |
| CR_08000C_A | 2.62        |         |
| C3_06100C_A | 2.61 DED1   | DED1    |
| C3_06860C_A | 2.61        | YJR096W |
| C4_06850C_A | 2.61        | MAP1    |
| C1_01470W_A | 2.60        | NAB2    |
| C1_08090C_A | 2.60 FUN12  | FUN12   |
| C2_05440W_A | 2.60 PEX6   | PEX6    |
| C4_03720C_A | 2.60        |         |
| C6_03480W_A | 2.60 YMX6   |         |
| C7_00590W_A | 2.58        |         |
| C2_06070W_A | 2.57 FAA2-1 |         |
| CR_08320W_A | 2.57 ATS1   | ATS1    |
| C3_03330C_A | 2.55        | CLF1    |
| C4_03730C_A | 2.55        | TRM5    |
| C6_01980C_A | 2.55        | MRPS18  |
| CR_07780W_A | 2.55        |         |
| C1_03370W_A | 2.54        | PAB1    |
| C2_01920C_A | 2.54        |         |
| C3_03070W_A | 2.54        |         |
| C5_03550W_A | 2.54        | NUP2    |
| CR_09930W_A | 2.54        | YDR124W |
| C2_02690W_A | 2.53 SER2   | SER2    |
| C1_07090C_A | 2.52        | RNH70   |
| C2_10640C_A | 2.52 MTR2   | MTR2    |
| C4_01680W_A | 2.52 TOA2   | TOA2    |
| C5_01930W_A | 2.52        | PRP9    |
| C2_00220C_A | 2.51        | TFG2    |
| C3_05790C_A | 2.51        | SGF11   |
| C4_05260W_A | 2.51        | IKI3    |
| C1_02310C_A | 2.50        | GON7    |

|             |      |         |
|-------------|------|---------|
| C1_11020W_A | 2.50 |         |
| C3_07620C_A | 2.50 | RIT1    |
| C2_03090C_A | 2.49 | ADE8    |
| C2_00810C_A | 2.48 |         |
| C2_09140C_A | 2.48 | MET10   |
| C1_14130W_A | 2.47 | FTR1    |
| C2_01510C_A | 2.47 | TAD2    |
| C5_02490C_A | 2.47 | TIF5    |
| CR_04050C_A | 2.47 | MEX67   |
| C2_06810C_A | 2.46 | RPL11B  |
| C2_08050C_A | 2.46 | SIT1    |
| C6_02730W_A | 2.46 | SAC6    |
| CR_09310W_A | 2.46 | RKM1    |
| C4_02880C_A | 2.45 | SDO1    |
| CR_04740C_A | 2.45 | ADE6    |
| C1_11560C_A | 2.44 | MRX8    |
| C2_05810W_A | 2.44 | BOP3    |
| C4_00160C_A | 2.44 | CAR2    |
| C4_03160C_A | 2.44 |         |
| C1_08600C_A | 2.43 | GCD6    |
| C1_13400C_A | 2.43 | AGC1    |
| C2_00280C_A | 2.43 | CWC24   |
| C2_09930W_A | 2.43 | UBX4    |
| C6_00640C_A | 2.43 | TFB4    |
| C7_01220W_A | 2.43 | GCN3    |
| C1_02910C_A | 2.42 | ATG17   |
| C1_07510W_A | 2.42 | YBL036C |
| C2_03700W_A | 2.42 | NTA1    |
| C1_02440C_A | 2.41 | OTU1    |
| C1_03240W_A | 2.41 |         |
| C4_01130C_A | 2.41 | VPS71   |
| CR_02430C_A | 2.41 | FAP1    |
| C5_00140C_A | 2.39 | YHR140W |
| C2_02880C_A | 2.38 | EBP7    |
| C2_06020W_A | 2.38 | CNT     |
| C2_09750W_A | 2.38 | LEU42   |
| C1_01770W_A | 2.37 | MAK32   |
| C2_00100C_A | 2.37 | YJL171C |
| C5_01910W_A | 2.37 | GIS2    |
| C1_02880C_A | 2.36 | MIA40   |
| C1_09060C_A | 2.36 | FUN14   |
| C7_03220C_A | 2.36 | ZCF29   |
| CR_04360C_A | 2.36 | NHP2    |
| CR_08130W_A | 2.36 | ATP10   |
| C4_05100C_A | 2.35 | MYO5    |
| C6_03750C_A | 2.35 | SBA1    |
| C6_03800C_A | 2.35 | IZH3    |

|             |      |         |
|-------------|------|---------|
| C7_01940C_A | 2.35 | PRM10   |
| C2_08240W_A | 2.34 | ORF298  |
| CR_09990W_A | 2.34 |         |
| C1_11370C_A | 2.33 | LCD1    |
| C4_04090C_A | 2.33 | CNE1    |
| C2_04480W_A | 2.32 |         |
| C2_06960W_A | 2.32 | SPE3    |
| C6_01160W_A | 2.32 | RCN1    |
| CR_03630W_A | 2.32 | IFF3    |
| C2_09950W_A | 2.31 | FCY21   |
| C5_00290W_A | 2.31 | DUS4    |
| C5_02730C_A | 2.31 | CIA1    |
| C6_03330C_A | 2.31 | YPR097W |
| C7_02020W_A | 2.31 | RAD14   |
| C1_00520W_A | 2.30 | YOR283W |
| CR_07080W_A | 2.30 | TIF6    |
| C1_00510W_A | 2.29 | ECM31   |
| C1_10220C_A | 2.29 | TPK1    |
| C2_03990W_A | 2.29 | GCD7    |
| C4_01670C_A | 2.29 | TAP42   |
| C5_01940W_A | 2.29 | RIB2    |
| C7_02290W_A | 2.29 |         |
| C1_08100W_A | 2.28 | DRG1    |
| C3_02030W_A | 2.28 | PCP1    |
| C3_04220C_A | 2.28 | URK1    |
| C3_05310W_A | 2.28 | USO6    |
| C4_04720W_A | 2.28 | MTD1    |
| C6_03690W_A | 2.28 | ALS5    |
| CR_10400W_A | 2.28 | ARD1    |
| C2_05490W_A | 2.27 |         |
| C2_09170W_A | 2.27 | SLP2    |
| C5_05430W_A | 2.27 | PEX4    |
| C1_12410C_A | 2.26 | PKH2    |
| C3_07290W_A | 2.26 | OCA5    |
| C4_05400C_A | 2.26 |         |
| C1_10450W_A | 2.25 | GLY1    |
| C2_00960C_A | 2.25 | MXR1    |
| C2_06170C_A | 2.25 | ECM17   |
| CR_10170C_A | 2.25 | ASP1    |
| C1_06910C_A | 2.24 | CAF130  |
| C1_13260W_A | 2.24 | FPR2    |
| C1_14490C_A | 2.24 | SAM35   |
| C2_07570W_A | 2.24 | RNR22   |
| C2_07890W_A | 2.24 | PRS5    |
| C1_00530C_A | 2.23 |         |
| C1_05930C_A | 2.23 | DUG2    |
| C1_10340W_A | 2.23 |         |

|             |      |        |         |
|-------------|------|--------|---------|
| C1_13160W_A | 2.23 | PSA2   |         |
| C2_08860W_A | 2.23 |        | FPK1    |
| C3_05590C_A | 2.23 | BAT22  |         |
| C3_07430W_A | 2.23 |        | DET1    |
| C4_01840C_A | 2.23 |        | AIM2    |
| C6_02590C_A | 2.23 | MOB1   | MOB1    |
| CR_02460W_A | 2.23 |        |         |
| C3_00890C_A | 2.22 |        |         |
| C4_04510W_A | 2.22 |        | TFC3    |
| C5_03680W_A | 2.22 | FGR27  |         |
| C1_01520C_A | 2.21 | SOD2   | SOD2    |
| C2_05520W_A | 2.21 |        | EFM4    |
| C6_04590C_A | 2.20 | NAG1   |         |
| C1_04990C_A | 2.19 |        |         |
| C1_07390W_A | 2.19 |        | UBX5    |
| C2_00140W_A | 2.19 | NDT80  | NDT80   |
| C2_04520C_A | 2.19 |        |         |
| C2_08090W_A | 2.19 |        |         |
| C5_03740W_A | 2.19 |        |         |
| CR_09240C_A | 2.19 |        | YPL225W |
| C1_04340C_A | 2.18 |        | YMR010W |
| C2_04190C_A | 2.18 | UGA1   | UGA1    |
| C2_10770W_A | 2.18 | RPC11  | RPC11   |
| C4_00700C_A | 2.18 |        |         |
| C4_02620C_A | 2.18 |        | YDR109C |
| CR_04780W_A | 2.18 | RPB8   | RPB8    |
| CR_08370W_A | 2.18 | GSH2   | GSH2    |
| C1_03110W_A | 2.17 | RPL6   | RPL6B   |
| C1_11900C_A | 2.17 |        | UPF3    |
| C2_08460C_A | 2.17 |        |         |
| C4_07100C_A | 2.17 |        | BRR2    |
| C1_00550W_A | 2.16 | CIS2   | ECM38   |
| C1_07890C_A | 2.16 | ADE5,7 | ADE5,7  |
| C1_09000W_A | 2.16 |        | YTP1    |
| C1_10410W_A | 2.16 |        |         |
| C1_01490W_A | 2.15 |        |         |
| C7_03990C_A | 2.15 |        | TAN1    |
| CR_08180C_A | 2.15 | TRM9   | TRM9    |
| C1_03300C_A | 2.14 | MAS1   | MAS1    |
| C1_09390W_A | 2.14 |        | MOD5    |
| C2_00620C_A | 2.14 |        | EFM3    |
| C3_06060W_A | 2.14 | ELP3   | ELP3    |
| C4_05810W_A | 2.14 |        | CAJ1    |
| CR_00590W_A | 2.14 | PHO81  | PHO81   |
| C1_13910C_A | 2.13 | MODF   | YDR061W |
| C2_03910C_A | 2.13 |        | MNL1    |
| C3_06340W_A | 2.13 | HNT2   | HNT2    |

|             |             |         |
|-------------|-------------|---------|
| C3_06680C_A | 2.13        |         |
| C3_07480W_A | 2.13        | PRP19   |
| CR_00980C_A | 2.13        | CAB3    |
| CR_09110C_A | 2.13        | PGA3    |
| C1_01130W_A | 2.12        | MET30   |
| C1_07240W_A | 2.12 YPD1   | YPD1    |
| C2_07610C_A | 2.12        | RQC1    |
| C3_06150W_A | 2.12        | YPR022C |
| C5_00950C_A | 2.12        | SET5    |
| C6_02480W_A | 2.12        | ADH7    |
| C1_05560W_A | 2.11 RIB4   | RIB4    |
| C1_06110C_A | 2.11 NPL4   | NPL4    |
| C2_04930C_A | 2.11 CRK1   | SGV1    |
| C2_05150W_A | 2.11 PEX2   | PEX2    |
| C4_04630C_A | 2.11        |         |
| C7_03360W_A | 2.11 CPY1   | PRC1    |
| CR_08660W_A | 2.11 PRP8   | PRP8    |
| C1_02430C_A | 2.10        | YGR054W |
| C1_03430W_A | 2.10        | TGL2    |
| C1_05540C_A | 2.10        |         |
| C1_07290W_A | 2.10        |         |
| C2_10190C_A | 2.10 OCA1   | OCA1    |
| C3_01140W_A | 2.10        |         |
| C3_02870C_A | 2.10        |         |
| C5_00180W_A | 2.10        | VIP1    |
| CR_07700W_A | 2.10        |         |
| C1_11010C_A | 2.09        | PEX32   |
| C2_09600C_A | 2.09        | YCR090C |
| C3_05510W_A | 2.09        |         |
| C7_02330W_A | 2.09 YCF1   | YCF1    |
| CR_02510W_A | 2.09        | AZF1    |
| CR_03990C_A | 2.09 GCD1   | GCD1    |
| CR_08090W_A | 2.09 SSB1   | SSB2    |
| C4_02740W_A | 2.08        |         |
| C5_03670C_A | 2.08        |         |
| C5_04610W_A | 2.08        | YJR084W |
| C6_02410W_A | 2.08        | NPY1    |
| CR_05890C_A | 2.08        | VPS75   |
| CR_10430C_A | 2.08        | SPP2    |
| C1_05630C_A | 2.07        | KAP123  |
| C3_06940W_A | 2.07        |         |
| C6_00660C_A | 2.07        | AIM7    |
| C1_01100W_A | 2.06 CCH1   | CCH1    |
| C1_06790C_A | 2.06 MRPL19 | MRPL19  |
| C1_11660W_A | 2.06 GAD1   | GAD1    |
| C2_01870C_A | 2.06        |         |
| C2_03360W_A | 2.06        | AMD1    |

|             |      |         |         |
|-------------|------|---------|---------|
| C2_07380W_A | 2.06 | SSC1    | SSC1    |
| C2_09880C_A | 2.06 |         | YOR338W |
| C3_01350C_A | 2.06 | URA3    | URA3    |
| C4_05590W_A | 2.06 |         | YPR117W |
| C6_03760C_A | 2.06 | SHM2    | SHM2    |
| CR_00210W_A | 2.06 | ALK2    |         |
| CR_08250C_A | 2.06 | HSP104  | HSP104  |
| C1_07570C_A | 2.05 |         |         |
| C2_10710W_A | 2.05 | TIF11   | TIF11   |
| C5_01640W_A | 2.05 | MAS2    | MAS2    |
| C5_05190W_A | 2.05 | PCL5    | PCL5    |
| C1_04120C_A | 2.04 |         | IST3    |
| C1_07820W_A | 2.04 |         | YFR045W |
| C1_08710W_A | 2.04 |         | YNL050C |
| C1_12780W_A | 2.04 | RBK1    | RBK1    |
| C2_03550C_A | 2.04 |         | NMD2    |
| C2_04370W_A | 2.04 |         |         |
| C2_05100C_A | 2.04 | ERF1    | SUP45   |
| C3_04680W_A | 2.04 | RPP2B   | RPP2B   |
| C6_04080W_A | 2.04 |         | MAP2    |
| C2_09070C_A | 2.03 |         |         |
| C4_05170C_A | 2.03 | NBP35   | NBP35   |
| C5_00900C_A | 2.03 | URA4    | URA4    |
| C1_06510C_A | 2.02 |         | MCH4    |
| C1_06960W_A | 2.02 | SUI2    | SUI2    |
| C1_07420C_A | 2.02 | PEX3    | PEX3    |
| C4_04880W_A | 2.02 | FGR10   |         |
| C4_06420W_A | 2.02 |         |         |
| C5_01520C_A | 2.02 | GLR1    | GLR1    |
| C1_07130C_A | 2.01 |         |         |
| C1_07200W_A | 2.01 | YMC1    | YMC1    |
| C2_08760C_A | 2.01 | TIF4631 | TIF4631 |
| C3_03890W_A | 2.01 | CSC25   | CDC25   |
| C4_01460C_A | 2.01 |         |         |
| C7_03530C_A | 2.01 | ISY1    | ISY1    |
| C1_12890W_A | 2.00 |         |         |
| C2_05370C_A | 2.00 | RXT3    | RXT3    |
| C2_07140W_A | 2.00 |         | YNL010W |
| C2_08780W_A | 2.00 | RPT6    | RPT6    |
| C4_03040W_A | 2.00 |         | RPB10   |
| C4_04270W_A | 2.00 |         | DAL3    |
| C5_02170C_A | 2.00 | GCD11   | GCD11   |
| C6_00970C_A | 2.00 | HAL21   | MET22   |

#### S120 vs B120 Upregulated genes

| Gene ID     | Fold change | Standard gene name | Name of <i>S. cerevisiae</i> ortholog(s) |
|-------------|-------------|--------------------|------------------------------------------|
| C1_14120C_A | 37.69       | RBE1               | PRY2                                     |



|             |       |       |         |
|-------------|-------|-------|---------|
| C1_00170W_A | 35.29 | LEU4  | LEU4    |
| CR_06300C_A | 30.47 | FGR50 |         |
| C2_08590W_A | 22.16 | YWP1  |         |
| C1_07330W_A | 20.22 | RME1  | RME1    |
| C5_03440W_A | 18.99 |       |         |
| C1_05000W_A | 18.33 | RHD1  |         |
| C1_11990W_A | 17.22 |       |         |
| C6_03250W_A | 15.95 | BMT4  |         |
| CR_05210W_A | 15.7  |       |         |
| C2_06460W_A | 15.06 | RTA3  |         |
| C6_04130C_A | 14.43 | ALS4  |         |
| C4_02220C_A | 13.8  | ZCF25 |         |
| CR_01200W_A | 13.47 | OYE22 |         |
| C2_06970W_A | 13.1  | AAH1  | AAH1    |
| C1_02270C_A | 12.9  |       |         |
| C4_03960W_A | 12.7  |       |         |
| C4_06530C_A | 12.45 | XUT1  |         |
| C1_04750W_A | 12.25 | IFE1  | BDH2    |
| C7_04230W_A | 11.72 | NRG1  | NRG2    |
| C1_06810W_A | 11.65 | CAT1  | CTA1    |
| C6_01180C_A | 11.31 | EBP1  |         |
| CR_01160W_A | 11.23 |       |         |
| C3_05580C_A | 10.48 | GAP2  | GAP1    |
| C1_13870W_A | 10.32 | MET3  | MET3    |
| C3_01460C_A | 9.37  | FOX3  |         |
| C2_03690C_A | 9.25  |       |         |
| C4_01010C_A | 9.05  | DAG7  |         |
| C1_08070W_A | 8.87  | CDR4  |         |
| CR_00150C_A | 8.77  | POT1  | POT1    |
| CR_08890C_A | 8.73  | ASR2  |         |
| C3_06850W_A | 8.41  | FCR1  |         |
| C5_03530C_A | 8.29  |       | COQ10   |
| C4_06390W_A | 8.12  | SOU1  |         |
| C3_04210W_A | 8.05  |       |         |
| C7_02240W_A | 7.78  | FMP45 | FMP45   |
| C6_01420C_A | 7.75  |       |         |
| C2_08170W_A | 7.73  |       | SAY1    |
| C1_02800W_A | 7.28  |       |         |
| C1_01220C_A | 7.16  |       |         |
| C1_01750W_A | 7.12  |       | YCR023C |
| C2_03120W_A | 7.12  | AMO1  |         |
| C1_09610W_A | 7.1   |       |         |
| C5_00430W_A | 7.1   | MET14 | MET14   |
| C2_08400C_A | 6.95  |       |         |
| C6_01010W_A | 6.85  | KAR5  | KAR5    |
| C2_07570W_A | 6.84  | RNR22 |         |
| C1_06570W_A | 6.83  | ANT1  | ANT1    |

|             |      |        |         |
|-------------|------|--------|---------|
| C3_02310W_A | 6.68 | MEP1   | MEP3    |
| C3_04200W_A | 6.67 | AFP99  |         |
| C3_02480C_A | 6.39 | CCP1   | CCP1    |
| C6_04190C_A | 6.37 |        |         |
| CR_01810C_A | 6.1  |        |         |
| CR_09140C_A | 6.04 |        | MSC1    |
| C4_05700W_A | 6.02 | ZCF5   |         |
| C6_00960W_A | 5.98 | CAN1   |         |
| C6_00480C_A | 5.77 | FET3   |         |
| C6_03360C_A | 5.77 |        |         |
| C3_00410C_A | 5.66 |        |         |
| C2_08870C_A | 5.64 | PIR1   | PIR1    |
| CR_05380C_A | 5.6  | YCP4   | YCP4    |
| C1_05480C_A | 5.59 |        |         |
| C2_00180C_A | 5.56 |        |         |
| C3_01960C_A | 5.56 | POX1-3 | POX1    |
| C4_05540W_A | 5.56 | HOM3   | HOM3    |
| C5_02080C_A | 5.54 | HSP12  |         |
| C5_02110W_A | 5.51 |        | HSP12   |
| C1_08240C_A | 5.43 |        |         |
| C1_10110W_A | 5.41 |        |         |
| C1_05060W_A | 5.33 | REI1   | REI1    |
| C1_08840W_A | 5.32 |        |         |
| C1_04660W_A | 5.24 | DUR1,2 | DUR1,2  |
| CR_02880W_A | 5.24 |        |         |
| CR_04220C_A | 5.21 |        |         |
| C6_00870C_A | 5.16 | ILV5   | ILV5    |
| C4_06620C_A | 5.09 |        |         |
| CR_09150W_A | 5.09 |        |         |
| C1_07990C_A | 5.04 |        |         |
| C4_00160C_A | 5.03 | CAR2   | CAR2    |
| C5_04030W_A | 5.03 |        |         |
| C4_04840C_A | 4.99 | AGP3   | AGP3    |
| C4_02200C_A | 4.96 |        |         |
| C6_04610C_A | 4.93 | NAG3   |         |
| C1_13600W_A | 4.92 |        | YBL029W |
| C3_03710W_A | 4.89 | CCC1   | CCC1    |
| C4_02610C_A | 4.89 | SUL2   | SUL1    |
| C3_00810C_A | 4.84 | FOX2   | FOX2    |
| C6_02940C_A | 4.79 |        |         |
| C1_06740C_A | 4.72 | NOP6   | NOP6    |
| C2_04460W_A | 4.72 | LYS22  |         |
| C3_04580C_A | 4.63 | STP1   |         |
| CR_00360C_A | 4.61 | LEU1   | LEU1    |
| C1_02980W_A | 4.58 | GOR1   | GOR1    |
| C1_01150C_A | 4.57 |        | PPM2    |
| C6_04380W_A | 4.56 | ALS2   |         |

|             |             |         |
|-------------|-------------|---------|
| C2_09920W_A | 4.5         | RRG9    |
| CR_06550C_A | 4.48        |         |
| C3_02810C_A | 4.43 FAA21  | FAA2    |
| C4_06380W_A | 4.41 SOU2   |         |
| C5_00140C_A | 4.4         | YHR140W |
| CR_00310C_A | 4.39        |         |
| C6_03630W_A | 4.36 PAD1   | PAD1    |
| C4_03050C_A | 4.3         | CPS1    |
| C5_03470C_A | 4.22        |         |
| C4_04140W_A | 4.18        |         |
| C2_00080C_A | 4.17 FAV3   |         |
| C6_00290W_A | 4.08        |         |
| C1_04460C_A | 4.06        |         |
| C6_03610W_A | 4.06 FGR17  |         |
| C2_04230W_A | 4 BAT21     | BAT2    |
| C1_06720C_A | 3.99        |         |
| C1_08790W_A | 3.94 TPO3   | TPO2    |
| C2_10240W_A | 3.89 GPD1   | GPD1    |
| C2_05890C_A | 3.87 IDP1   | IDP1    |
| CR_05620C_A | 3.87 MTG2   | MTG2    |
| C4_01470W_A | 3.84        | HRT3    |
| C7_00110W_A | 3.82 SOD3   |         |
| C7_03850W_A | 3.82        | NOC3    |
| C3_04860W_A | 3.81        | SFP1    |
| C4_03160C_A | 3.8         |         |
| C1_02620C_A | 3.76 HOM6   | HOM6    |
| C6_02500C_A | 3.74 GCV1   | GCV1    |
| C6_00520W_A | 3.73        |         |
| CR_05390W_A | 3.73 PST3   | PST2    |
| C6_03530C_A | 3.71        |         |
| C2_00130W_A | 3.67        |         |
| C1_11070W_A | 3.65 PET127 | PET127  |
| C4_03110W_A | 3.65        | DNF3    |
| C6_03710W_A | 3.65 ALS9   | FLO1    |
| C4_03190W_A | 3.63        |         |
| C4_07050W_A | 3.63 YDC1   | YDC1    |
| C4_06120W_A | 3.61 GDH3   | GDH3    |
| CR_08490W_A | 3.58 TSR1   | TSR1    |
| C3_00320W_A | 3.56 RHR2   | GPP1    |
| C2_06850W_A | 3.55        | SLX9    |
| C3_03870C_A | 3.49 SAP9   | YPS1    |
| C1_07820W_A | 3.48        | YFR045W |
| C2_09590C_A | 3.48        | PIC2    |
| C3_02670W_A | 3.48        | RSA1    |
| CR_06770C_A | 3.46        |         |
| C2_09750W_A | 3.44 LEU42  |         |
| C7_04090C_A | 3.42        |         |

|             |            |         |
|-------------|------------|---------|
| C3_06760W_A | 3.4        | RRP1    |
| C4_04810C_A | 3.4        | TRM8    |
| C2_04480W_A | 3.37       |         |
| C2_07300C_A | 3.36 RPA12 | RPA12   |
| CR_07480W_A | 3.35       | YBR287W |
| C2_02910W_A | 3.34       |         |
| C2_07130C_A | 3.34 RCK2  | RCK2    |
| C5_05410C_A | 3.27 ILV3  | ILV3    |
| C3_00100W_A | 3.26       | YJU2    |
| C6_03180C_A | 3.26       | ALY2    |
| C1_08890C_A | 3.25       | MSL1    |
| C4_02720C_A | 3.22       | SFK1    |
| C7_03880C_A | 3.22       |         |
| C1_03180W_A | 3.21       | LIP2    |
| C3_02040C_A | 3.21       | LOC1    |
| C6_01890C_A | 3.21       | DBP9    |
| C2_08200W_A | 3.2        |         |
| C1_13670W_A | 3.18 OSM2  | OSM1    |
| CR_04110W_A | 3.16       | NAF1    |
| CR_09960C_A | 3.15 UGA3  | UGA3    |
| C1_10780C_A | 3.14 HNT1  | HNT1    |
| C3_03990C_A | 3.11 AAP1  |         |
| C1_09190C_A | 3.09 DAK2  | DAK2    |
| C2_01570W_A | 3.09       |         |
| C3_03140C_A | 3.08 DAL4  | DAL4    |
| C4_02050W_A | 3.08 HGH1  | HGH1    |
| C3_06860C_A | 3.07       | YJR096W |
| C1_08290C_A | 3.05 DIP2  | DIP2    |
| C1_08530W_A | 3.05       |         |
| C5_01080C_A | 3.05 GDS1  | GDS1    |
| C2_00880W_A | 3.03       |         |
| C5_00100C_A | 3.03       |         |
| C3_07360W_A | 3.02 DLD2  | DLD1    |
| C6_01980C_A | 3          | MRPS18  |
| CR_01470W_A | 3 CSP37    | OM45    |
| C1_06350W_A | 2.99       |         |
| C2_04570W_A | 2.99       | EBP2    |
| C3_05380W_A | 2.99       | YJL163C |
| C1_09600C_A | 2.98 LIP6  |         |
| C4_06710W_A | 2.97       |         |
| C2_09500W_A | 2.96       | DUS1    |
| C4_00510C_A | 2.96 RLP24 | RLP24   |
| CR_03240C_A | 2.96       | JJJ1    |
| C1_13060C_A | 2.95       | MEF1    |
| C2_08130W_A | 2.95 ARA1  | ARA1    |
| C5_01110W_A | 2.95       | OTU2    |
| C1_07000W_A | 2.94 MEF2  | MEF2    |

|             |      |       |         |
|-------------|------|-------|---------|
| C6_04310W_A | 2.94 | PEX11 | PEX11   |
| CR_04210C_A | 2.94 | QDR1  | QDR1    |
| C2_04120C_A | 2.92 |       | NOP12   |
| C6_02230W_A | 2.91 |       | LSG1    |
| C4_02880C_A | 2.9  |       | SDO1    |
| C4_01170C_A | 2.87 | BMT9  |         |
| C1_06550W_A | 2.86 | GLT1  | GLT1    |
| C1_08060W_A | 2.86 | OFR1  |         |
| C4_03350C_A | 2.86 |       |         |
| C5_03800W_A | 2.86 |       | RCF1    |
| CR_01570W_A | 2.86 |       | PTH2    |
| C1_04740W_A | 2.84 | LPG20 | YPL088W |
| C3_04510W_A | 2.84 |       | YBL028C |
| CR_05790C_A | 2.84 | ACO2  | ACO2    |
| CR_05990C_A | 2.84 | SFL1  | SFL1    |
| C2_09000C_A | 2.83 |       |         |
| CR_02420W_A | 2.83 |       | UTP23   |
| CR_03450W_A | 2.83 | HXT5  |         |
| C1_07960W_A | 2.82 |       | LRP1    |
| C1_01520C_A | 2.81 | SOD2  | SOD2    |
| C2_02640C_A | 2.81 |       |         |
| C2_07960C_A | 2.81 | NSA1  | NSA1    |
| C4_01090C_A | 2.81 |       |         |
| C4_04500C_A | 2.81 |       | EFM5    |
| CR_01980C_A | 2.81 | CRC1  | CRC1    |
| C1_01240W_A | 2.8  | IFD3  |         |
| CR_01410C_A | 2.8  |       | YNL035C |
| C4_01840C_A | 2.79 |       | AIM2    |
| C4_03710C_A | 2.79 |       |         |
| C3_05070W_A | 2.78 | CEM1  | CEM1    |
| CR_01400W_A | 2.78 | LYS12 | LYS12   |
| C1_09160W_A | 2.77 | AOX1  |         |
| C7_03540C_A | 2.77 | ENP2  | ENP2    |
| C2_07450C_A | 2.76 | RCL1  | RCL1    |
| C1_01160C_A | 2.75 |       | RRP40   |
| C1_03400W_A | 2.75 |       | ART5    |
| C1_06120C_A | 2.75 |       |         |
| C2_09140C_A | 2.75 | MET10 | MET10   |
| C2_08050C_A | 2.73 | SIT1  | ARN1    |
| C2_00410C_A | 2.72 |       | ECM16   |
| C3_03800W_A | 2.72 | PTR22 | PTR2    |
| C5_04650C_A | 2.72 | MSM1  | MSM1    |
| C7_03530C_A | 2.72 | ISY1  | ISY1    |
| C4_06790W_A | 2.71 |       | GPN3    |
| C7_02340C_A | 2.71 |       | TRM82   |
| C1_01490W_A | 2.7  |       |         |
| C5_05130C_A | 2.7  |       | CAB5    |

|             |            |         |
|-------------|------------|---------|
| C3_05140C_A | 2.69       | TRM11   |
| C4_00210W_A | 2.69       | YPL034W |
| C4_05460C_A | 2.69 OFD1  | TPA1    |
| C3_01560W_A | 2.68       | PRP43   |
| C1_06440C_A | 2.67       |         |
| C1_09910C_A | 2.66       |         |
| C2_07630C_A | 2.66       | RTC3    |
| C3_07300W_A | 2.66 NOP13 | NOP13   |
| C4_04880W_A | 2.66 FGR10 |         |
| CR_02710W_A | 2.66 RRP9  | RRP9    |
| CR_09370W_A | 2.66 ELF1  | NEW1    |
| C1_12190W_A | 2.65 BUL4  |         |
| C6_04530C_A | 2.65       | RTT10   |
| CR_02030C_A | 2.65       | RCM1    |
| C1_03660W_A | 2.64       |         |
| C1_09710C_A | 2.64       | UTP7    |
| C6_00800C_A | 2.64       |         |
| C1_09690W_A | 2.63 MLS1  | MLS1    |
| C2_06470W_A | 2.63 RTA2  | RSB1    |
| C3_00370C_A | 2.63 BUD21 | BUD21   |
| C7_00590W_A | 2.63       |         |
| C2_09160W_A | 2.62       | RRP45   |
| C5_00310C_A | 2.62       |         |
| C7_04190C_A | 2.62 UTP18 | UTP18   |
| CR_08940W_A | 2.62       | GCD14   |
| C1_07880C_A | 2.61 GCS1  | GSH1    |
| C1_13630W_A | 2.61 CYB2  | CYB2    |
| C6_02560W_A | 2.61       | YMR315W |
| CR_00210W_A | 2.61 ALK2  |         |
| CR_07030C_A | 2.61       | RRP36   |
| C3_03200C_A | 2.6        | YDR286C |
| C4_01370W_A | 2.6 ILV6   | ILV6    |
| C6_03930W_A | 2.6 OPT8   | YGL114W |
| CR_10470C_A | 2.6        | BFR2    |
| C7_00690W_A | 2.59 NOP15 | NOP15   |
| C7_02100W_A | 2.59       |         |
| C1_05270C_A | 2.58       | MHR1    |
| C1_10970W_A | 2.58       | ESF1    |
| C2_00840W_A | 2.58       | TAH18   |
| C2_01870C_A | 2.58       |         |
| CR_04810W_A | 2.58 RPS3  | RPS3    |
| CR_09670C_A | 2.58       | YJL068C |
| C1_09810W_A | 2.57       | YGR210C |
| C2_07070W_A | 2.56       | ZTA1    |
| C2_09380W_A | 2.56 RRP15 | RRP15   |
| C5_05280C_A | 2.56 SDH4  | TIM18   |
| C6_01000C_A | 2.56       | AEP1    |

|             |             |        |
|-------------|-------------|--------|
| CR_08000C_A | 2.56        |        |
| C1_06800W_A | 2.55        | RAI1   |
| C4_02300W_A | 2.55 HOS3   | HOS3   |
| C4_03030C_A | 2.55 NAN1   | NAN1   |
| C5_04290C_A | 2.55        |        |
| C1_11700C_A | 2.54 MRF1   |        |
| C2_01740C_A | 2.54        | MRPL31 |
| C4_02790C_A | 2.54 SAS10  | SAS10  |
| C4_00700C_A | 2.53        |        |
| C5_02270W_A | 2.53 THR4   | THR4   |
| CR_06590C_A | 2.53 RGS2   | RGS2   |
| CR_02690W_A | 2.52        | ALF1   |
| CR_07700W_A | 2.52        |        |
| C2_01010W_A | 2.51 HGT8   |        |
| C2_09660W_A | 2.51        | NOP16  |
| C3_03390C_A | 2.51 YAH1   | YAH1   |
| C4_01730C_A | 2.51        | PBY1   |
| C4_03900C_A | 2.51 RAM1   | RAM1   |
| CR_00670C_A | 2.51        | TRM13  |
| CR_03000C_A | 2.51        |        |
| C1_02850W_A | 2.5         | VTs1   |
| C1_02880C_A | 2.5 MIA40   | MIA40  |
| C2_06480W_A | 2.5         | TRM10  |
| C4_05010W_A | 2.5         | RSA4   |
| CR_03010C_A | 2.5 ERV1    | ERV1   |
| C3_07550C_A | 2.49        | GEP3   |
| C1_04040C_A | 2.48        | NOP9   |
| C2_07340W_A | 2.48 NOC4   | NOC4   |
| C3_02140C_A | 2.48        |        |
| C3_04370C_A | 2.48        | URB2   |
| C4_02410C_A | 2.48 AHP1   | AHP1   |
| C5_02280C_A | 2.48        | CTR86  |
| C1_12360C_A | 2.47 RIB3   | RIB3   |
| C3_06380W_A | 2.47 NSA2   | NSA2   |
| C7_01490W_A | 2.47        |        |
| C1_11020W_A | 2.46        |        |
| C4_04470W_A | 2.46 SAP10  |        |
| C4_06820C_A | 2.46 CZF1   |        |
| C6_04200C_A | 2.46        |        |
| C1_11420W_A | 2.45 KRR1   | KRR1   |
| C2_08240W_A | 2.45 ORF298 |        |
| C3_05800W_A | 2.45        | SEN54  |
| C4_04820C_A | 2.45        | MRPL11 |
| C1_11380W_A | 2.44 NEP1   | EMG1   |
| C2_01760C_A | 2.44        |        |
| C2_06000W_A | 2.44 LAS1   | LAS1   |
| C2_08000C_A | 2.44 KRE30  | ARB1   |

|             |      |        |         |
|-------------|------|--------|---------|
| C4_02140C_A | 2.44 | TIM10  | TIM10   |
| C6_00640C_A | 2.44 |        | TFB4    |
| CR_03470W_A | 2.44 |        | YPL014W |
| CR_10240W_A | 2.44 | UTP5   | UTP5    |
| C1_03830C_A | 2.43 |        | CSL4    |
| CR_06720W_A | 2.43 | NMD3   | NMD3    |
| C2_08670C_A | 2.41 | UTP15  | UTP15   |
| C4_04110W_A | 2.41 |        |         |
| CR_08990C_A | 2.41 |        |         |
| C1_10880W_A | 2.4  |        | UTP6    |
| C2_04930C_A | 2.4  | CRK1   | SGV1    |
| C1_11970C_A | 2.39 |        |         |
| C1_13720W_A | 2.39 |        | KEL3    |
| C2_02980C_A | 2.39 | DLD1   |         |
| C4_01080W_A | 2.39 | RAT1   | RAT1    |
| C5_02120C_A | 2.39 | RIX7   | RIX7    |
| C5_02730C_A | 2.39 |        | CIA1    |
| C6_04240W_A | 2.39 |        |         |
| C2_00140W_A | 2.38 | NDT80  | NDT80   |
| C4_02620C_A | 2.38 |        | YDR109C |
| CR_03710C_A | 2.38 |        |         |
| CR_07050C_A | 2.38 | URA2   | URA2    |
| C1_08870C_A | 2.37 | JIP5   | JIP5    |
| C2_02880C_A | 2.37 | EBP7   |         |
| C2_08460C_A | 2.37 |        |         |
| C4_05230C_A | 2.37 |        | RIX1    |
| CR_10550W_A | 2.37 | DRS1   | DRS1    |
| C5_01430C_A | 2.36 |        | RBA50   |
| CR_04760C_A | 2.36 |        | YMR221C |
| C1_11010C_A | 2.35 |        | PEX32   |
| C1_02820W_A | 2.34 | LYS2   | LYS2    |
| C1_03840W_A | 2.34 |        |         |
| C1_14320C_A | 2.34 |        | FMP41   |
| C3_00750W_A | 2.34 | LYS144 |         |
| C3_03650W_A | 2.33 | HBR3   | NOB1    |
| C4_06210C_A | 2.33 |        | NUG1    |
| C4_07030W_A | 2.33 | MET16  | MET16   |
| C5_03710C_A | 2.33 |        |         |
| C6_03470W_A | 2.33 |        | CSR1    |
| C5_03390C_A | 2.32 | FUR1   | FUR1    |
| C6_00360C_A | 2.32 |        | MIX23   |
| C7_01030C_A | 2.32 |        | RRP12   |
| C7_03120W_A | 2.32 | TIM54  | TIM54   |
| C1_02810W_A | 2.31 | RAD16  | RAD16   |
| C1_06820W_A | 2.31 |        |         |
| C1_07950C_A | 2.31 |        | RRP17   |
| C4_01740W_A | 2.31 | TIM12  | TIM12   |



|             |      |         |
|-------------|------|---------|
| CR_02060W_A | 2.31 |         |
| C2_05090W_A | 2.3  | MAK5    |
| C6_00760W_A | 2.3  | FES1    |
| C6_01040C_A | 2.3  | DHR2    |
| CR_10410C_A | 2.3  | PNO1    |
| C1_02090C_A | 2.29 | DRN1    |
| C2_00480C_A | 2.29 | PHHB    |
| C3_01680C_A | 2.29 | YDL183C |
| C3_03500W_A | 2.29 | SKN2    |
| C4_02830C_A | 2.29 | HCA4    |
| C5_00930C_A | 2.29 | TFS1    |
| CR_03750C_A | 2.29 | PRP42   |
| C2_02430W_A | 2.28 | UTP21   |
| C2_04510W_A | 2.28 | RIM2    |
| C3_00960W_A | 2.28 |         |
| C5_03920C_A | 2.28 | FCF1    |
| C7_03400C_A | 2.28 | MTR4    |
| C7_03520W_A | 2.28 | PNC1    |
| CR_03070W_A | 2.28 | DOM34   |
| C2_01970C_A | 2.27 | ROD1    |
| C3_05570W_A | 2.27 | QDR2    |
| C7_03930C_A | 2.27 | MAM33   |
| CR_05630W_A | 2.27 | DBP8    |
| C1_05820C_A | 2.26 | RAD10   |
| C2_06360C_A | 2.26 | MAK16   |
| C3_02950C_A | 2.26 | MET13   |
| CR_03280W_A | 2.26 | IFR2    |
| C2_00820W_A | 2.25 | MSS1    |
| C2_02190C_A | 2.25 |         |
| C2_09170W_A | 2.25 | SLP2    |
| C2_09260C_A | 2.25 | GLO2    |
| C3_06830C_A | 2.25 | YLR419W |
| C5_03030W_A | 2.25 |         |
| CR_08690C_A | 2.25 | ECI1    |
| C5_00550C_A | 2.24 |         |
| C5_01420W_A | 2.24 | SNA2    |
| C5_02010C_A | 2.24 | BUD27   |
| C5_03410C_A | 2.24 | MRPL20  |
| CR_02810W_A | 2.24 | CIRT4B  |
| CR_07950W_A | 2.24 | IMP4    |
| C2_02710C_A | 2.23 | RRP7    |
| C5_01140C_A | 2.23 | MSC6    |
| CR_03370C_A | 2.23 | KTI12   |
| CR_05750W_A | 2.23 |         |
| C1_04320W_A | 2.22 | GPM2    |
| CR_05020W_A | 2.22 | LYP1    |
| C1_04340C_A | 2.21 | YMR010W |

|             |             |        |
|-------------|-------------|--------|
| C2_03130W_A | 2.21        | SFM1   |
| C3_01790C_A | 2.21        |        |
| C3_07290W_A | 2.21        | OCA5   |
| C4_01830C_A | 2.21        |        |
| CR_09310W_A | 2.21        | RKM1   |
| C1_11220C_A | 2.2 TIM50   | TIM50  |
| C1_03150C_A | 2.19        |        |
| C1_13940W_A | 2.19 SIM1   | UTH1   |
| C2_07520C_A | 2.19        | NAM8   |
| C2_10640C_A | 2.19 MTR2   | MTR2   |
| C4_06780C_A | 2.19 OYE32  |        |
| C5_01910W_A | 2.19 GIS2   | GIS2   |
| CR_00570W_A | 2.18        | COQ1   |
| CR_07640C_A | 2.18        | VFA1   |
| C1_00230C_A | 2.17 BFA1   | BFA1   |
| C7_00950W_A | 2.17 YML6   | YML6   |
| C2_06070W_A | 2.16 FAA2-1 |        |
| CR_03760W_A | 2.16        | NNT1   |
| CR_04170W_A | 2.16        | NOP2   |
| CR_10400W_A | 2.16        | ARD1   |
| C1_05030C_A | 2.15 PSF2   | PSF2   |
| C1_08430W_A | 2.15 CAF16  | CAF16  |
| C2_01580W_A | 2.15 REX2   | REX2   |
| C3_01000W_A | 2.15 BMS1   | BMS1   |
| C3_06230W_A | 2.15 CYM1   | CYM1   |
| CR_03650W_A | 2.15 SGD1   | SGD1   |
| C1_09720W_A | 2.14 URA1   | URA1   |
| C2_02540W_A | 2.14        | RRP5   |
| C2_07920W_A | 2.14        | RRT2   |
| C3_02320W_A | 2.14 ILV2   | ILV2   |
| C5_01520C_A | 2.14 GLR1   | GLR1   |
| C1_02890C_A | 2.13        |        |
| C1_08810C_A | 2.12 MSS116 | MSS116 |
| C2_03560C_A | 2.12        | MRPL35 |
| C2_08480W_A | 2.12 RRP8   | RRP8   |
| C3_02130W_A | 2.12 UTP4   | UTP4   |
| C6_02430W_A | 2.12        | ITC1   |
| C7_03030W_A | 2.12        |        |
| CR_09800C_A | 2.12        | UTP14  |
| C3_03820C_A | 2.11        | PNT1   |
| C5_05340W_A | 2.11        | SQT1   |
| C1_01480C_A | 2.1 RPS21   | RPS2   |
| C1_02840W_A | 2.1 PDE2    | PDE2   |
| C1_08260C_A | 2.1 LTP1    | LTP1   |
| C2_04820W_A | 2.1         | MRM1   |
| C3_07100C_A | 2.1         | NGR1   |
| C5_04580C_A | 2.1         | VPS25  |

|             |            |         |
|-------------|------------|---------|
| C7_01970C_A | 2.1 TOM40  | TOM40   |
| CR_02260C_A | 2.1        |         |
| CR_08570W_A | 2.1 SKI2   | SKI2    |
| C1_10950C_A | 2.09       | RIO1    |
| C2_04160W_A | 2.09       | YGR021W |
| C3_00420W_A | 2.09       | TRZ1    |
| C5_05440C_A | 2.09       |         |
| CR_03200C_A | 2.09       | POP1    |
| C1_00530C_A | 2.08       |         |
| C1_03430W_A | 2.08       | TGL2    |
| C1_03900W_A | 2.08 SEN15 | SEN15   |
| C1_06760C_A | 2.08       | IPI3    |
| C1_13260W_A | 2.08       | FPR2    |
| C2_06750C_A | 2.08       |         |
| C7_03130C_A | 2.08 DFR1  | DFR1    |
| CR_04880W_A | 2.08       | GLY1    |
| CR_08410W_A | 2.08       | REH1    |
| C1_00560W_A | 2.07 CNS1  | CNS1    |
| C1_05990C_A | 2.07       | YDL144C |
| C1_07210C_A | 2.07       |         |
| C2_05160C_A | 2.07       | PUF6    |
| C2_10270W_A | 2.07 PUS7  | PUS7    |
| C3_06730W_A | 2.07       |         |
| CR_00680W_A | 2.07 BUD22 | BUD22   |
| C1_05840W_A | 2.06 PRN1  |         |
| C1_12890W_A | 2.06       |         |
| C4_02870C_A | 2.06 ZUO1  | ZUO1    |
| C4_06680C_A | 2.06       | SMY2    |
| C6_02970C_A | 2.06       | PEX25   |
| CR_08500W_A | 2.06       | SYO1    |
| CR_08840C_A | 2.06 NIT2  | NIT2    |
| C1_13820C_A | 2.05       |         |
| C2_05340C_A | 2.05 RPC40 | RPC40   |
| C3_07660W_A | 2.05       | RAD4    |
| C6_02410W_A | 2.05       | NPY1    |
| C7_04210C_A | 2.05       |         |
| C1_05050C_A | 2.04 RRP6  | RRP6    |
| C2_02490C_A | 2.04       | YPK9    |
| C2_03700W_A | 2.04       | NTA1    |
| C2_03830W_A | 2.04       | DPH6    |
| C3_07040C_A | 2.04 YSA1  | YSA1    |
| C4_06850C_A | 2.04       | MAP1    |
| C7_01200C_A | 2.04 DBP7  | DBP7    |
| C7_03630C_A | 2.04 TIM9  | TIM9    |
| C1_06780W_A | 2.03 NPR1  | NPR1    |
| C2_09510C_A | 2.03       | SAL1    |
| C3_06350W_A | 2.03       | MED6    |

|             |            |       |
|-------------|------------|-------|
| C4_00690C_A | 2.03       | DPH2  |
| C5_00030W_A | 2.03       | MRPL1 |
| C2_05060C_A | 2.02       | SRX1  |
| C2_09280C_A | 2.02       |       |
| C3_05930W_A | 2.02 CTA4  | OAF1  |
| C5_00800C_A | 2.02       | BNA2  |
| C5_02690W_A | 2.02       |       |
| C5_04360C_A | 2.02       | SDT1  |
| C1_00590W_A | 2.01 TUF1  | TUF1  |
| C1_01110C_A | 2.01 ZPR1  | ZPR1  |
| C3_04560W_A | 2.01 MAK21 | MAK21 |
| C3_05120C_A | 2.01       | PAC10 |
| CR_01950W_A | 2.01       | RPA43 |
| CR_04240C_A | 2.01       | KRE33 |
| CR_06000W_A | 2.01 SOK1  | SOK1  |
| CR_08330W_A | 2.01       | OPI10 |
| CR_08600C_A | 2.01 PEX19 | PEX19 |
| C1_13330C_A | 2          | SPE4  |
| CR_08860W_A | 2 PDK2     | PKP1  |

#### S20 Vs B20 Downregulated genes

| Gene ID     | Fold change | Standard gene name | Name of <i>S. cerevisiae</i> ortholog(s) |
|-------------|-------------|--------------------|------------------------------------------|
| C4_03570W_A | -1,265.60   | HWP1               |                                          |
| C1_06280C_A | -677.49     | UME6               |                                          |
| C6_02100W_A | -428.43     |                    |                                          |
| C4_04080C_A | -91.97      | PGA31              |                                          |
| C2_02390W_A | -59.95      |                    |                                          |
| C6_03850C_A | -42.14      | IHD1               | YFL067W                                  |
| C5_04250W_A | -38.85      | MRV8               |                                          |
| C4_03520C_A | -27.61      | RBT1               |                                          |
| C5_04370C_A | -25.29      | PGA37              |                                          |
| CR_05430W_A | -21.8       | CSP1               |                                          |
| C2_03220C_A | -19.91      | STP4               | STP3                                     |
| C4_02900C_A | -19.31      | CRH11              | CRH1                                     |
| C5_04190W_A | -18.41      | MRV2               | YDL218W                                  |
| C4_04050C_A | -16.04      | RHD3               |                                          |
| CR_09180W_A | -13.76      | CDG1               |                                          |
| C6_02210W_A | -11.91      |                    |                                          |
| C1_02110C_A | -11.24      | HGT2               |                                          |
| C6_04420W_A | -10.94      |                    |                                          |
| C5_03430W_A | -9.95       |                    |                                          |
| CR_03890W_A | -9.84       | WOR3               |                                          |
| C2_03120W_A | -8.85       | AMO1               |                                          |
| CR_08990C_A | -8.85       |                    |                                          |
| CR_09090C_A | -8.75       |                    |                                          |
| CR_07790C_A | -8.03       | YHB1               | YHB1                                     |
| C5_01250W_A | -7.84       | GPR1               | GPR1                                     |

|             |       |         |
|-------------|-------|---------|
| C3_01640C_A | -7.79 |         |
| CR_02900W_A | -7.65 |         |
| C3_04070C_A | -7.6  | CDR11   |
| CR_09680C_A | -7.6  | RTA4    |
| C2_04010C_A | -7.44 | HSP21   |
| CR_05170C_A | -6.37 | FDH1    |
| C1_06000W_A | -6.21 |         |
| CR_10330W_A | -6.07 | PGA11   |
| CR_02070C_A | -6.02 | ADH5    |
| C3_01440C_A | -5.84 |         |
| C3_02650W_A | -5.84 |         |
| C5_03730W_A | -5.83 |         |
| C4_04850C_A | -5.79 | CSR1    |
| CR_01910C_A | -5.78 | ZAP1    |
| C2_09220W_A | -5.71 | BIO4    |
| C4_06970C_A | -5.69 | DDR48   |
| C3_03990C_A | -5.54 | DDR48   |
| C1_06160W_A | -5.47 |         |
| CR_09020C_A | -5.34 | CHS2    |
| C1_13100W_A | -5.1  | CHS1    |
| C6_00160W_A | -5.01 | PGA48   |
| C6_02330W_A | -4.86 |         |
| C4_04790W_A | -4.83 | FAV1    |
| C1_04010C_A | -4.67 | FUS2    |
| C1_11270W_A | -4.62 |         |
| C3_01360C_A | -4.55 | IRO1    |
| C1_03970W_A | -4.49 |         |
| C1_00270W_A | -4.46 |         |
| C4_05830W_A | -4.46 |         |
| C1_07160C_A | -4.45 |         |
| C2_04430W_A | -4.38 |         |
| C1_07980C_A | -4.37 | SAE3    |
| C4_04860W_A | -4.26 |         |
| C1_10060C_A | -4.2  |         |
| CR_09100C_A | -4.16 | YPR127W |
| CR_10340W_A | -4.01 | PTP3    |
| C1_02130C_A | -3.97 | GAL1    |
| C3_02280C_A | -3.97 | GFA1    |
| C3_00140W_A | -3.92 |         |
| C3_05750C_A | -3.85 |         |
| CR_05340C_A | -3.84 | IFE2    |
| C1_04500W_A | -3.83 | ICL1    |
| C2_10210C_A | -3.77 | RAS1    |
| C3_06000W_A | -3.73 | AHR1    |
| C3_03020W_A | -3.68 |         |
| C3_07830W_A | -3.67 | FBP1    |
| C7_00350C_A | -3.66 |         |

|             |       |       |         |
|-------------|-------|-------|---------|
| C4_00450C_A | -3.64 | PGA10 |         |
| C3_02790W_A | -3.62 |       |         |
| C4_02020W_A | -3.62 | CAT2  | CAT2    |
| C5_04980W_A | -3.62 |       |         |
| C1_14180W_A | -3.6  |       |         |
| C4_02360W_A | -3.58 | AMS1  | AMS1    |
| C7_03420C_A | -3.57 | SNG3  |         |
| C4_01260W_A | -3.49 | RLM1  | RLM1    |
| C1_10180C_A | -3.47 | ECM21 | ECM21   |
| C1_05440C_A | -3.34 |       |         |
| C1_00290W_A | -3.33 | POL93 |         |
| C1_10290W_A | -3.33 | GCA1  |         |
| C2_07900W_A | -3.33 | GDH2  | GDH2    |
| C5_04560C_A | -3.23 | CUP1  |         |
| CR_04960C_A | -3.17 | CRG1  |         |
| C1_01210W_A | -3.15 |       |         |
| C1_09690W_A | -3.15 | MLS1  | MLS1    |
| C1_12850W_A | -3.13 | BLP1  |         |
| C1_02150W_A | -3.12 | GAL10 | GAL10   |
| C1_11850W_A | -3.09 |       |         |
| C3_05710W_A | -3.03 | RCT1  | YNL208W |
| CR_02740W_A | -3.03 | INN1  | INN1    |
| C3_06470W_A | -3.02 | AAF1  |         |
| C4_04380C_A | -3.01 |       |         |
| C3_04530C_A | -2.98 | TEC1  | TEC1    |
| C2_04050C_A | -2.97 | DCK1  | DCK1    |
| C3_02290W_A | -2.94 |       | MRX10   |
| C1_05160C_A | -2.93 |       | YKR070W |
| C1_10300W_A | -2.92 | MNN12 | MNT2    |
| C1_00190C_A | -2.9  |       |         |
| C2_05130W_A | -2.82 |       | YML131W |
| C1_05140W_A | -2.81 | BRG1  |         |
| C2_08330W_A | -2.77 |       |         |
| C3_04640W_A | -2.76 | ZCF31 |         |
| CR_03260W_A | -2.74 |       | YGR127W |
| C2_04440W_A | -2.73 |       |         |
| C2_04450W_A | -2.73 |       |         |
| CR_02360W_A | -2.72 | IDP2  | IDP2    |
| C1_12140W_A | -2.71 |       |         |
| C4_01860C_A | -2.7  |       |         |
| C1_03320C_A | -2.69 | EHD3  | EHD3    |
| C4_06150C_A | -2.68 |       | HOP2    |
| C3_07640C_A | -2.65 | FUM12 |         |
| C5_04470C_A | -2.64 |       |         |
| CR_00090C_A | -2.61 |       | YMR090W |
| C2_09810C_A | -2.6  |       |         |
| C4_00860C_A | -2.59 |       | PIN2    |

|             |       |        |         |
|-------------|-------|--------|---------|
| C5_03050C_A | -2.59 | PGA58  |         |
| CR_04480C_A | -2.58 | LAP3   | LAP3    |
| C3_02810C_A | -2.56 | FAA21  | FAA2    |
| CR_04730W_A | -2.54 |        | YJR085C |
| C3_04630W_A | -2.53 |        |         |
| CR_00780C_A | -2.52 | GSY1   | GSY1    |
| CR_09690C_A | -2.51 | PLB3   | PLB1    |
| C6_01900C_A | -2.47 | DOG1   | DOG2    |
| C3_05550C_A | -2.46 |        |         |
| C5_04830W_A | -2.45 | SFL2   | MGA1    |
| CR_08690C_A | -2.45 | ECI1   | ECI1    |
| C4_03430W_A | -2.44 | MOH1   | MOH1    |
| C1_03720C_A | -2.43 |        |         |
| C5_03240W_A | -2.43 | BUB3   | BUB3    |
| C1_11730W_A | -2.38 |        |         |
| C3_04910C_A | -2.37 | NCE102 | NCE102  |
| C5_04510W_A | -2.37 | GDE1   | GDE1    |
| C2_07730W_A | -2.35 | YVC1   | YVC1    |
| C3_00880W_A | -2.35 | KGD1   | KGD1    |
| CR_02020C_A | -2.34 | OPT1   | OPT1    |
| C4_06510C_A | -2.31 | CSO99  |         |
| CR_07140C_A | -2.31 |        |         |
| C2_06470W_A | -2.29 | RTA2   | RSB1    |
| C7_03480W_A | -2.29 |        | YEL1    |
| CR_06270W_A | -2.29 |        |         |
| C5_02800C_A | -2.28 |        |         |
| C1_01760W_A | -2.26 | FGR38  |         |
| C1_04100C_A | -2.25 | POR1   | POR1    |
| C1_08350C_A | -2.25 |        |         |
| C2_07750W_A | -2.25 | RHO2   | RHO2    |
| C4_02370C_A | -2.25 | PGA59  |         |
| C4_02390W_A | -2.25 | PGA62  |         |
| C2_09650W_A | -2.24 |        | SGN1    |
| C3_02890C_A | -2.24 |        |         |
| C1_01710W_A | -2.23 |        |         |
| C6_00790C_A | -2.23 | CTR1   | CTR1    |
| C4_00150C_A | -2.22 | PEX5   | PEX5    |
| CR_07290W_A | -2.22 | FRE7   |         |
| C2_03210W_A | -2.19 |        |         |
| C6_03700W_A | -2.19 | ALS1   |         |
| CR_03730C_A | -2.15 |        |         |
| CR_05730C_A | -2.15 |        | MDM36   |
| C1_03270W_A | -2.13 |        | YMR114C |
| C1_11950W_A | -2.13 |        |         |
| C1_14440C_A | -2.13 | GDI1   | GDI1    |
| C6_00840W_A | -2.12 | GPX2   |         |
| C7_02040C_A | -2.11 | CUP9   | TOS8    |

|             |       |       |      |
|-------------|-------|-------|------|
| C3_02710W_A | -2.1  |       |      |
| C6_00810C_A | -2.1  |       |      |
| CR_03780C_A | -2.1  |       |      |
| C5_03150W_A | -2.08 |       | PRR1 |
| C1_08030W_A | -2.06 | PFY1  | PFY1 |
| C1_09650W_A | -2.05 |       |      |
| C1_14420W_A | -2.05 | DDI1  | DDI1 |
| C4_04530C_A | -2.05 | PHR1  |      |
| C7_01860W_A | -2.05 |       |      |
| CR_05670C_A | -2.05 | HMO1  | HMO1 |
| CR_07280W_A | -2.05 | FRE30 |      |
| C4_05110C_A | -2.04 | HAP41 |      |
| C3_04920C_A | -2.03 |       | NAS6 |
| C2_09030W_A | -2.02 |       |      |
| C4_03590C_A | -2.02 | OSH3  | OSH3 |
| C5_02520W_A | -2.01 |       |      |

#### S45 vs B45 Downregulated genes

Gene I D      Fold change   Standard gene nan   Name of *S. cerevisiae* ortholog(s)

|             |          |       |         |
|-------------|----------|-------|---------|
| C4_03570W_A | -2361.30 | HWP1  |         |
| C4_03470C_A | -1800.63 | ECE1  |         |
| C6_03030W_A | -511.46  | SAP5  |         |
| CR_06670W_A | -424.18  | CFL11 | TUB2    |
| C6_02710C_A | -418.36  | SAP6  | CLN2    |
| C1_06280C_A | -264.33  | UME6  |         |
| C4_04070C_A | -113.74  | PGA30 |         |
| CR_07070C_A | -105.50  | ALS3  |         |
| C1_05920W_A | -73.11   |       |         |
| C6_03850C_A | -63.83   | IHD1  | DUT1    |
| C4_03520C_A | -57.10   | RBT1  |         |
| C2_00680C_A | -51.19   | SOD5  | GAL1    |
| C1_13450W_A | -38.73   | HYR1  | GAL10   |
| C3_00920W_A | -35.11   | ATO1  | EXG2    |
| C5_04930C_A | -31.35   | MAL31 |         |
| CR_02490W_A | -28.32   | OPT4  | ECM33   |
| CR_03890W_A | -25.94   | WOR3  | CDC12   |
| C6_00840W_A | -21.12   | GPX2  |         |
| C5_03750W_A | -20.73   | FAV2  |         |
| C2_08430C_A | -20.69   | PGA46 |         |
| C5_03430W_A | -19.39   |       |         |
| C4_04380C_A | -19.21   |       | CHL4    |
| C6_02330W_A | -17.36   |       |         |
| C4_02030W_A | -15.85   | RFX2  |         |
| C2_02390W_A | -15.71   |       | LAS21   |
| C2_07720C_A | -13.35   |       | YOR238W |
| C4_03500C_A | -13.32   |       |         |
| C7_00280W_A | -12.69   | HGT12 | POL32   |



|             |        |        |
|-------------|--------|--------|
| C3_05990C_A | -10.58 |        |
| C5_03930C_A | -10.49 |        |
| C1_00780C_A | -10.23 | HGC1   |
| C7_02500C_A | -10.22 | DPP3   |
| C3_06400C_A | -9.77  |        |
| C2_09530W_A | -9.27  | EAP1   |
| C4_04170C_A | -9.14  | AXL2   |
| C4_03690C_A | -9.10  | CTF4   |
| C7_03150W_A | -8.76  | RHO5   |
| C3_01470W_A | -8.74  | ARF3   |
| C3_01360C_A | -8.58  | IRO1   |
| C4_01220C_A | -7.98  | ALG9   |
| C2_07730W_A | -7.79  | YVC1   |
| C1_06250W_A | -7.71  | DOC1   |
| C1_06630W_A | -7.64  | DPM1   |
| C2_04050C_A | -7.62  | DCK1   |
| C5_02460C_A | -7.56  | ECM331 |
| C4_03070W_A | -7.49  | PGA54  |
| CR_10790W_A | -7.35  | MAL2   |
| C1_02630C_A | -7.12  | EXG2   |
| C1_13100W_A | -7.06  |        |
| CR_06510W_A | -7.06  | CLA4   |
| C1_06140C_A | -6.91  | MNT2   |
| C4_01240C_A | -6.89  |        |
| C4_06490C_A | -6.87  | PRI2   |
| C6_01960W_A | -6.79  | ERP5   |
| C1_12550C_A | -6.62  | CDC54  |
| C7_01500W_A | -6.58  | GIN4   |
| C7_01380W_A | -6.56  |        |
| CR_06500C_A | -6.55  | SMY1   |
| C3_06670C_A | -6.50  |        |
| C6_04420W_A | -6.44  | MCD4   |
| C1_10210C_A | -6.32  | CLA4   |
| C2_04440W_A | -6.16  | RAX2   |
| CR_07790C_A | -6.12  | YHB1   |
| C2_06250C_A | -6.11  | CDC46  |
| CR_01530C_A | -6.08  |        |
| C2_02850W_A | -6.04  | UGA6   |
| C7_03480W_A | -6.01  |        |
| C1_06340W_A | -5.90  |        |
| C4_01250W_A | -5.83  | NAT4   |
| C1_07370C_A | -5.80  | CPH1   |
| C2_01330C_A | -5.76  | SIR2   |
| C1_01980W_A | -5.74  | HGT1   |
| C5_01460W_A | -5.66  | YBL053 |
| C7_00770W_A | -5.61  |        |
| CR_01910C_A | -5.57  |        |

|             |             |         |
|-------------|-------------|---------|
| C4_04790W_A | -5.55 FAV1  | MYO2    |
| C2_01250W_A | -5.48       | LCB2    |
| CR_03680C_A | -5.43 SMC1  | IRR1    |
| C2_03160C_A | -5.34 RNR1  | RFA1    |
| C2_01400C_A | -5.22 ESC4  | SAS2    |
| C2_07350W_A | -5.19 MCM3  |         |
| C2_01980C_A | -5.15 SRD1  |         |
| C3_06000W_A | -5.14 AHR1  |         |
| C2_03010C_A | -5.09 RNR21 |         |
| C1_13170C_A | -5.04 MSH6  |         |
| C3_04300C_A | -5.04 POL1  | PTM1    |
| C4_01770W_A | -5.00 POL30 | RTT107  |
| C2_06260W_A | -4.93       | MPO1    |
| C4_02600C_A | -4.92       | MSB2    |
| C2_10210C_A | -4.87 RAS1  | YOL019W |
| C4_05250W_A | -4.87       | FAB1    |
| C5_00740W_A | -4.87 CTF8  |         |
| C2_04450W_A | -4.81       |         |
| C5_04250W_A | -4.80 MRV8  |         |
| C2_07180W_A | -4.76       |         |
| C1_08230C_A | -4.74 PLB5  | SUR2    |
| C5_02800C_A | -4.72       | RNR2    |
| C3_06880W_A | -4.71       | RNR1    |
| CR_00300W_A | -4.69 CDA2  |         |
| C1_12200W_A | -4.66 MCD4  |         |
| CR_02140W_A | -4.65 RSR1  | DCK1    |
| C3_05350C_A | -4.63 SMI1B | YPR011C |
| C2_07660W_A | -4.61 PDS5  |         |
| C3_02880W_A | -4.61       |         |
| C1_07160C_A | -4.58       |         |
| C2_00440W_A | -4.58 SAS2  | HIS3    |
| C4_05900C_A | -4.56       | ITR2    |
| C1_01330C_A | -4.55 DUT1  |         |
| C1_04590W_A | -4.55       | RHO3    |
| C4_00720W_A | -4.53 CSP2  | CDC21   |
| C6_00820W_A | -4.49 SUN41 | ERP3    |
| CR_01060W_A | -4.46 LAG1  | MCM5    |
| C6_03100W_A | -4.40 SHE3  | YLR281C |
| C6_02210W_A | -4.35       | PIL1    |
| C3_01550C_A | -4.32 TOS1  | LTE1    |
| C3_02330C_A | -4.29       |         |
| C3_00170C_A | -4.27       | RFA2    |
| C5_04830W_A | -4.19 SFL2  |         |
| C7_01550W_A | -4.14 BEM2  | MCM3    |
| C6_00830C_A | -4.11 CAN3  |         |
| C1_00580W_A | -4.07       | PDS5    |
| C2_05190W_A | -4.06 CDC21 |         |

|             |       |       |       |
|-------------|-------|-------|-------|
| CR_02360W_A | -4.06 | IDP2  | YVC1  |
| CR_00920W_A | -4.04 | CCE1  | RHO2  |
| C5_05350W_A | -3.95 |       |       |
| C2_06870C_A | -3.93 | PST1  | AIF1  |
| C4_01320C_A | -3.92 | OPT6  |       |
| CR_09070C_A | -3.89 |       | DPB11 |
| CR_09530C_A | -3.88 |       |       |
| C6_02990W_A | -3.86 |       |       |
| C3_04610W_A | -3.82 | MEA1  |       |
| C5_02780W_A | -3.81 |       |       |
| CR_09050C_A | -3.81 |       |       |
| C1_06270W_A | -3.78 |       | SGN1  |
| C1_07030C_A | -3.76 | RBT4  |       |
| CR_01920W_A | -3.73 |       | RAS1  |
| C3_04740C_A | -3.71 |       |       |
| C2_07750W_A | -3.68 | RHO2  | SGS1  |
| C3_04530C_A | -3.62 | TEC1  |       |
| CR_04650W_A | -3.57 |       | RDH54 |
| CR_09440C_A | -3.55 |       | VTC1  |
| C7_01100C_A | -3.53 |       |       |
| C2_09490W_A | -3.50 | PHO13 |       |
| C6_01940W_A | -3.45 |       |       |
| C4_01860C_A | -3.44 |       |       |
| CR_07810W_A | -3.44 | YHB5  | TAO3  |
| C2_04970W_A | -3.43 | ABP2  | TOS1  |
| C6_00180C_A | -3.43 |       | DIG2  |
| CR_04680C_A | -3.43 |       | ERG6  |
| C7_03080W_A | -3.40 | LMO1  |       |
| C6_00440C_A | -3.39 | FET34 |       |
| C1_14230C_A | -3.37 | IRR1  |       |
| C7_03440W_A | -3.37 | SNG4  |       |
| C4_04250W_A | -3.35 |       | ALT1  |
| C6_03670C_A | -3.34 |       |       |
| C4_01260W_A | -3.33 | RLM1  |       |
| C4_04590W_A | -3.29 | SCS7  |       |
| C6_03310W_A | -3.29 |       | POL1  |
| C1_00710C_A | -3.28 | TUB2  | VAM3  |
| C6_02090C_A | -3.28 |       | TEC1  |
| C3_00650W_A | -3.24 | NGT1  | AFI1  |
| C5_01250W_A | -3.23 | GPR1  | TOP3  |
| C7_01580W_A | -3.23 | SMC6  | RDI1  |
| CR_02910W_A | -3.19 |       |       |
| CR_04660C_A | -3.16 | UGP1  |       |
| C1_00850W_A | -3.14 | IHD2  |       |
| C1_10940C_A | -3.14 | ERP5  | ERV25 |
| C2_01780W_A | -3.14 | MSB2  | UNG1  |
| C6_03990C_A | -3.07 |       | OST6  |

|             |               |         |
|-------------|---------------|---------|
| C2_10840W_A | -3.06 RDH54   | BNI5    |
| C6_00400C_A | -3.05         |         |
| C2_10420W_A | -3.04 FGR6-4  |         |
| C1_08140W_A | -3.02         | SEC61   |
| C4_07120C_A | -3.02 MSH2    |         |
| C2_04810W_A | -3.01 HIS3    | SPC2    |
| C4_02900C_A | -3.01 CRH11   |         |
| C4_03990C_A | -3.01         |         |
| C4_05530W_A | -3.01 FGR6-10 |         |
| CR_09600C_A | -3.01 YKE2    |         |
| C2_07120W_A | -3.00 RFA2    | NAT4    |
| CR_00390W_A | -2.98         | RLM1    |
| CR_05690W_A | -2.97 MCT1    |         |
| C1_10630C_A | -2.96         |         |
| CR_01150C_A | -2.96 CTF18   | POL30   |
| CR_02100C_A | -2.96         |         |
| CR_09810W_A | -2.92         |         |
| C4_01420W_A | -2.91         |         |
| C5_03580C_A | -2.91 CAC2    | PHO89   |
| C1_09080C_A | -2.88 PGA6    |         |
| C2_02570W_A | -2.88         | ERV29   |
| C5_03900W_A | -2.88 PGA56   |         |
| C7_02540W_A | -2.88         | RLF2    |
| CR_09560C_A | -2.86         | CRH1    |
| CR_07220C_A | -2.84         |         |
| CR_09120C_A | -2.84 TUB1    |         |
| C2_10830W_A | -2.83         | HTD2    |
| C1_10300W_A | -2.79 MNN12   |         |
| C4_02930W_A | -2.79         |         |
| C1_07850C_A | -2.78         |         |
| C1_02130C_A | -2.77 GAL1    |         |
| C1_01210W_A | -2.76         |         |
| C1_04570C_A | -2.76 CHL4    |         |
| CR_10700W_A | -2.76 RFC4    |         |
| C2_05290C_A | -2.75         |         |
| C3_03490W_A | -2.75 RSN1    | AXL2    |
| C5_00630C_A | -2.75 EXO1    | YMR155W |
| CR_02070C_A | -2.75 ADH5    |         |
| C7_02750W_A | -2.71 FGR6-1  | MRP8    |
| C1_00830W_A | -2.70         |         |
| C2_03790C_A | -2.70 ASR3    | SCS7    |
| C4_01230C_A | -2.69         | FUS2    |
| C5_01590W_A | -2.68         |         |
| C1_05070C_A | -2.66 GPI7    |         |
| CR_06270W_A | -2.66         | TRS130  |
| C1_07250C_A | -2.65 ALG9    |         |
| C4_07080C_A | -2.65         |         |

|             |       |            |
|-------------|-------|------------|
| C7_04320W_A | -2.65 |            |
| C2_06860W_A | -2.63 | LTE1       |
| C3_02150C_A | -2.63 | ERG6 PRI2  |
| C7_04120W_A | -2.63 | MSC2       |
| C5_00070W_A | -2.62 | CDC11      |
| CR_09180W_A | -2.62 | CDG1 MSH2  |
| C1_13780W_A | -2.60 | MYO2 CDC1  |
| C3_02890C_A | -2.59 | SAS4       |
| C1_12700W_A | -2.58 | APC4       |
| C3_01800C_A | -2.58 | CDC11      |
| C1_11140W_A | -2.56 | EXO1       |
| C3_06410C_A | -2.55 | CTF8       |
| C1_05850W_A | -2.54 | POL32      |
| C1_12110C_A | -2.54 | GPR1       |
| C3_02910W_A | -2.54 | TOF1       |
| CR_05730C_A | -2.54 | ULA1       |
| C1_03210C_A | -2.52 | CDC12      |
| C1_06730W_A | -2.51 | RAC1 ACH1  |
| C1_11400C_A | -2.51 | GIN4       |
| C2_08740W_A | -2.51 | SPT21      |
| C4_01940W_A | -2.51 | PHO89      |
| C5_00060C_A | -2.51 | YNK1       |
| C5_03950W_A | -2.50 | SUT1       |
| CR_02350C_A | -2.50 | GEF2       |
| CR_04570C_A | -2.50 | CDC10 MLC2 |
| C2_08450W_A | -2.49 |            |
| C3_01530C_A | -2.49 | CAS4 CAC2  |
| C6_01880W_A | -2.49 |            |
| C1_12790C_A | -2.48 | FEN1       |
| C2_10570W_A | -2.48 | SGS1 SIA1  |
| C3_04070C_A | -2.48 | CDR11      |
| C2_04180C_A | -2.47 | RFC3       |
| C4_04430W_A | -2.47 | MRP8       |
| C4_04530C_A | -2.46 | PHR1 MGA1  |
| C1_13190W_A | -2.45 | MAL31      |
| C2_00690W_A | -2.45 |            |
| C2_04720C_A | -2.45 | FGR51 PRI1 |
| C6_02130C_A | -2.45 | CTF5 GAS5  |
| C1_04490W_A | -2.44 |            |
| C4_01850C_A | -2.44 | PDC12      |
| CR_09210W_A | -2.44 | SUC1       |
| C1_00290W_A | -2.43 | POL93      |
| C2_02860W_A | -2.43 | SUR2 FET3  |
| C1_13020C_A | -2.42 | SPC3 MMS4  |
| C2_00380C_A | -2.42 | RFA1 SUN4  |
| CR_10530W_A | -2.42 |            |
| C4_07200C_A | -2.41 |            |

|             |             |         |
|-------------|-------------|---------|
| C5_05210W_A | -2.41       | SCJ1    |
| C6_03160C_A | -2.41 BMT6  |         |
| CR_09270C_A | -2.41 CBP1  | DOG2    |
| C2_08100W_A | -2.40       |         |
| C5_05390C_A | -2.40 PGA4  |         |
| C7_03160W_A | -2.40       |         |
| CR_10570C_A | -2.40 YHB4  | PXL1    |
| C1_05950C_A | -2.39       | MCM21   |
| C5_03260C_A | -2.39       |         |
| C6_00770C_A | -2.39       |         |
| C7_03800W_A | -2.38       |         |
| C1_03190C_A | -2.37 ECM33 | CRT10   |
| C1_03720C_A | -2.37       |         |
| C2_09650W_A | -2.37       |         |
| C1_02870W_A | -2.34 YPT7  | SHE3    |
| C1_12880C_A | -2.34       |         |
| CR_07590W_A | -2.34 EMP24 |         |
| C1_04620W_A | -2.33       |         |
| C5_02890W_A | -2.33 YNK1  | YFL067W |
| C7_00820W_A | -2.32 RFC2  |         |
| C1_12010C_A | -2.31 KIP4  |         |
| C3_06250W_A | -2.30 ERV25 |         |
| C3_07810C_A | -2.30 SEC61 |         |
| C4_03200C_A | -2.30       |         |
| C1_12870C_A | -2.29       |         |
| C6_02790C_A | -2.29       |         |
| C1_05740C_A | -2.28       | RFC2    |
| C2_03480C_A | -2.28       |         |
| C3_04190W_A | -2.28       |         |
| C5_03130W_A | -2.28 SUT1  |         |
| C4_03860C_A | -2.27       |         |
| C1_12220W_A | -2.26 CDC6  | BEM2    |
| C4_07210W_A | -2.25       | SMC6    |
| C1_04060W_A | -2.24 IFI3  | TOM7    |
| C4_06080W_A | -2.24       | DPP1    |
| CR_02790C_A | -2.24 ALG5  |         |
| C4_02370C_A | -2.23 PGA59 |         |
| C5_02000C_A | -2.23 ACH1  | LMO1    |
| C5_04000W_A | -2.23 RCF3  |         |
| C6_02000W_A | -2.23 PLB2  |         |
| C7_00100W_A | -2.23 FRP2  |         |
| CR_00180C_A | -2.23 CHT1  | YEL1    |
| CR_06740W_A | -2.23       | YNL217W |
| C3_04320W_A | -2.22 VAM3  | RER1    |
| CR_02860W_A | -2.22 RHO1  |         |
| C4_02120W_A | -2.21 ERV29 |         |
| C7_01890C_A | -2.21 TOM7  |         |

|             |       |       |       |
|-------------|-------|-------|-------|
| CR_08460W_A | -2.21 | TPM2  | PCK1  |
| CR_09570W_A | -2.21 |       | CDA2  |
| C1_12530C_A | -2.20 |       |       |
| C1_13900C_A | -2.20 | LCB2  | GSY1  |
| C2_06730W_A | -2.20 | LSP1  |       |
| C4_06340W_A | -2.20 | AGO1  | CCE1  |
| C7_01510W_A | -2.20 |       |       |
| C7_03500W_A | -2.20 |       | LAG1  |
| C2_05030C_A | -2.19 | RHO3  | CTF18 |
| C2_07770C_A | -2.19 |       |       |
| C3_06610W_A | -2.19 |       | MDM1  |
| CR_00200W_A | -2.19 | PCK1  | BIO4  |
| CR_00910W_A | -2.19 |       | BIO3  |
| C1_08350C_A | -2.18 |       |       |
| CR_00780C_A | -2.18 | GSY1  |       |
| C2_01340W_A | -2.17 |       | RSR1  |
| C2_08340C_A | -2.17 |       | RAD51 |
| C2_08380C_A | -2.17 |       |       |
| C5_05480W_A | -2.17 | DES1  | IDP2  |
| C6_01900C_A | -2.17 | DOG1  |       |
| C1_08990C_A | -2.16 | KEX2  | ALG5  |
| C1_13510C_A | -2.16 | TGL99 | RHO1  |
| CR_05340C_A | -2.16 | IFE2  | ATG13 |
| C1_12510W_A | -2.15 | RAX2  | SMC1  |
| C2_00640W_A | -2.15 |       |       |
| C7_00360W_A | -2.15 | DFI1  | CDC10 |
| CR_00930W_A | -2.15 | ATO10 | RBL2  |
| CR_10610C_A | -2.15 |       | UGP1  |
| C2_01660C_A | -2.14 |       |       |
| C5_01790C_A | -2.14 |       |       |
| C5_03370C_A | -2.14 |       | MCT1  |
| C6_00270W_A | -2.14 |       | MDM36 |
| C1_00360W_A | -2.13 | CDC13 | CDC28 |
| C1_03950C_A | -2.13 |       |       |
| C1_00790W_A | -2.12 |       |       |
| C3_03480C_A | -2.12 | ALT1  |       |
| C4_06770W_A | -2.12 |       |       |
| C4_00620C_A | -2.11 | SPC2  | SPC97 |
| C4_01920W_A | -2.11 |       |       |
| C2_01990C_A | -2.10 | FAB1  | NDL1  |
| C4_05790W_A | -2.10 |       | EMP24 |
| C4_00120W_A | -2.09 | PGA7  | YHB1  |
| CR_02200C_A | -2.09 | RAD51 |       |
| C1_02150W_A | -2.07 | GAL10 | TPM1  |
| C1_08010W_A | -2.07 | DPM1  |       |
| C2_04940C_A | -2.07 | ITR1  |       |
| C4_06050W_A | -2.07 | MED3  | TUB1  |

|             |       |       |         |
|-------------|-------|-------|---------|
| CR_06050W_A | -2.06 | CDC28 |         |
| C1_13660W_A | -2.05 | RAD54 | MAL13   |
| C3_05000W_A | -2.05 | RDI1  |         |
| C6_04410C_A | -2.05 |       |         |
| C1_05100W_A | -2.04 |       |         |
| C1_11940C_A | -2.04 |       |         |
| CR_01720W_A | -2.04 |       | YOR292C |
| C2_07650C_A | -2.03 |       | YKE2    |
| C2_09910C_A | -2.03 |       |         |
| C6_01460C_A | -2.03 |       |         |
| C1_09130W_A | -2.02 |       |         |
| C2_02660W_A | -2.02 |       |         |
| C1_10510W_A | -2.01 |       | APC11   |
| CR_10000C_A | -2.01 |       | RFC4    |
| C5_00890C_A | -2.00 | GIT2  | IMA1    |

#### S120 vs B120 Downregulated genes

| Gene I D | Fold change | Standard gene name (locus name) |
|----------|-------------|---------------------------------|
|----------|-------------|---------------------------------|

|             |           |        |
|-------------|-----------|--------|
| C4_03470C_A | -1,732.65 | ECE1   |
| C4_03570W_A | -528.71   | HWP1   |
| C6_03030W_A | -425.61   | SAP5   |
| C6_02710C_A | -222.69   | SAP6   |
| C1_07040C_A | -153.08   |        |
| C6_03850C_A | -145.49   | IHD1   |
| CR_07070C_A | -96.27    | ALS3   |
| C1_06280C_A | -75.17    | UME6   |
| C2_00680C_A | -52.42    | SOD5   |
| C5_04930C_A | -48.54    | MAL31  |
| C6_03090W_A | -45.97    |        |
| C2_08890W_A | -37.55    |        |
| C1_05920W_A | -34.62    |        |
| C6_02330W_A | -31.74    |        |
| C3_06660C_A | -31.35    |        |
| C4_02030W_A | -26.78    | RFX2   |
| C4_04080C_A | -24.43    | PGA31  |
| C3_00920W_A | -23.01    | ATO1   |
| C1_13450W_A | -22.14    | HYR1   |
| CR_08510W_A | -20.14    | PGA13  |
| C6_00840W_A | -18.61    | GPX2   |
| C5_03750W_A | -18.53    | FAV2   |
| C4_04070C_A | -15.85    | PGA30  |
| C4_03460C_A | -14.54    |        |
| C7_00630C_A | -14.29    |        |
| C5_03930C_A | -14.11    |        |
| C2_00670C_A | -13.51    |        |
| C1_00680W_A | -13.5     | ASM3   |
| C5_02460C_A | -13.31    | ECM331 |



|             |                 |
|-------------|-----------------|
| C1_06140C_A | -13.13          |
| C3_03460C_A | -12.7           |
| C1_13100W_A | -12.61          |
| C2_07720C_A | -12.59          |
| C3_07470W_A | -12.29          |
| C3_02330C_A | -11.91          |
| C4_00720W_A | -11.8 CSP2      |
| C4_04380C_A | -11.42          |
| C2_02390W_A | -10.94          |
| CR_03890W_A | -10.63 WOR3     |
| CR_08730W_A | -10.48 tE(UUC)7 |
| C4_03520C_A | -10.31 RBT1     |
| C3_05990C_A | -10.01          |
| C1_00780C_A | -10 HGC1        |
| C1_10300W_A | -9.97 MNN12     |
| C1_02730W_A | -9.87           |
| C7_02500C_A | -9.43 DPP3      |
| C1_02630C_A | -8.55 EXG2      |
| C3_05750C_A | -8.49           |
| CR_02210W_A | -8.46           |
| C7_03110W_A | -8.45 PGA28     |
| C6_04420W_A | -8.26           |
| CR_06510W_A | -8.17           |
| C5_04220W_A | -8.09 MRV5      |
| CR_06500C_A | -7.97           |
| C4_04170C_A | -7.88 AXL2      |
| CR_10100C_A | -7.81 INO1      |
| C6_02100W_A | -7.66           |
| C5_00010W_A | -7.44 TLO11     |
| C4_05560C_A | -7.37 ARO9      |
| CR_04680C_A | -7.31           |
| C7_03150W_A | -7.24           |
| C7_03480W_A | -7.15           |
| C2_09490W_A | -7.07 PHO13     |
| C5_03430W_A | -7.01           |
| CR_09440C_A | -6.85           |
| C2_01330C_A | -6.72 SIR2      |
| C2_00690W_A | -6.54           |
| C7_00090C_A | -6.5 CSA1       |
| C1_10210C_A | -6.43 CLA4      |
| C3_01360C_A | -6.38 IRO1      |
| C3_01020W_A | -6.22           |
| C6_00440C_A | -6.2 FET34      |
| CR_09530C_A | -6.2            |
| C2_06680W_A | -6.14 FRP3      |
| CR_02140W_A | -6.12 RSR1      |
| C1_08230C_A | -6.03 PLB5      |

|             |             |
|-------------|-------------|
| C1_12790C_A | -5.88 FEN1  |
| C1_14130W_A | -5.79 FTR1  |
| C4_05250W_A | -5.76       |
| C4_01320C_A | -5.75 OPT6  |
| C3_06130W_A | -5.71       |
| C3_06000W_A | -5.68 AHR1  |
| C1_12010C_A | -5.52 KIP4  |
| C3_02280C_A | -5.48 GFA1  |
| CR_07220C_A | -5.45       |
| C7_00770W_A | -5.3        |
| CR_01530C_A | -5.23       |
| CR_06660W_A | -5.05 SEO1  |
| C3_05330C_A | -4.97       |
| C1_05950C_A | -4.96       |
| C2_07180W_A | -4.92       |
| CR_07680C_A | -4.91       |
| C2_09530W_A | -4.88 EAP1  |
| C6_01070C_A | -4.87 CIP1  |
| C5_01260W_A | -4.85       |
| C3_00650W_A | -4.83 NGT1  |
| C6_02210W_A | -4.81       |
| C1_07030C_A | -4.77 RBT4  |
| C5_02600W_A | -4.64 PUT1  |
| C1_07370C_A | -4.54 CPH1  |
| C4_01220C_A | -4.54       |
| C2_06860W_A | -4.53 LTE1  |
| C1_01210W_A | -4.49       |
| C5_01990W_A | -4.41       |
| C7_01680C_A | -4.41       |
| CR_02910W_A | -4.35       |
| C4_01260W_A | -4.27 RLM1  |
| C4_03070W_A | -4.25 PGA54 |
| C5_01240W_A | -4.16 AUR1  |
| C4_04790W_A | -4.13 FAV1  |
| C3_01550C_A | -4.1 TOS1   |
| CR_09070C_A | -4.07       |
| C3_01470W_A | -4.06 ARF3  |
| CR_04440C_A | -4.04 RBR1  |
| C6_03100W_A | -4.03 SHE3  |
| C2_04050C_A | -4.02 DCK1  |
| C5_01590W_A | -3.99       |
| C1_08900W_A | -3.98       |
| CR_01060W_A | -3.98 LAG1  |
| C2_08750W_A | -3.97       |
| C1_00710C_A | -3.92 TUB2  |
| C7_01500W_A | -3.87       |
| C4_04860W_A | -3.86       |

|             |       |       |
|-------------|-------|-------|
| C6_00830C_A | -3.83 | CAN3  |
| C5_01250W_A | -3.78 | GPR1  |
| C1_07220W_A | -3.76 |       |
| C5_03900W_A | -3.73 | PGA56 |
| C1_06270W_A | -3.67 |       |
| C5_01070C_A | -3.65 |       |
| C1_00850W_A | -3.6  | IHD2  |
| C6_03500C_A | -3.59 | SAP4  |
| C2_07750W_A | -3.57 | RHO2  |
| C6_00820W_A | -3.57 | SUN41 |
| CR_07240C_A | -3.57 | CLG1  |
| C1_10270C_A | -3.56 | SFH5  |
| C3_04070C_A | -3.54 | CDR11 |
| CR_06920W_A | -3.53 |       |
| CR_07810W_A | -3.52 | YHB5  |
| C4_04980W_A | -3.51 |       |
| CR_10340W_A | -3.5  | PTP3  |
| C4_06490C_A | -3.49 | PRI2  |
| C1_06340W_A | -3.45 |       |
| C7_00100W_A | -3.45 | FRP2  |
| C3_01730C_A | -3.43 | UTR2  |
| C6_02090C_A | -3.43 |       |
| CR_09120C_A | -3.43 | TUB1  |
| C6_01710C_A | -3.41 | PTK2  |
| C1_00400W_A | -3.4  | SVF1  |
| C2_04970W_A | -3.4  | ABP2  |
| C2_10210C_A | -3.4  | RAS1  |
| C5_03260C_A | -3.4  |       |
| C1_03190C_A | -3.38 | ECM33 |
| CR_09060W_A | -3.38 |       |
| C2_09810C_A | -3.36 |       |
| C1_09320C_A | -3.34 |       |
| C1_01980W_A | -3.33 | HGT1  |
| C3_06670C_A | -3.27 |       |
| C1_10580C_A | -3.24 |       |
| C7_00360W_A | -3.24 | DFI1  |
| C5_01220W_A | -3.23 |       |
| CR_09600C_A | -3.22 | YKE2  |
| C2_07730W_A | -3.2  | YVC1  |
| C2_08450W_A | -3.2  |       |
| C2_06930C_A | -3.19 |       |
| C3_02720W_A | -3.19 |       |
| C5_00620W_A | -3.18 |       |
| C1_09870W_A | -3.16 | HCM1  |
| C6_01530C_A | -3.16 |       |
| C4_04530C_A | -3.12 | PHR1  |
| CR_09270C_A | -3.12 | CBP1  |

|             |             |
|-------------|-------------|
| C2_00640W_A | -3.11       |
| C3_04350C_A | -3.09       |
| C3_04610W_A | -3.09 MEA1  |
| C5_03020W_A | -3.09 CCC2  |
| CR_03790C_A | -3.09 KRE1  |
| C7_03500W_A | -3.08       |
| CR_09570W_A | -3.08       |
| C1_06250W_A | -3.07       |
| CR_09880W_A | -3.06 DEF1  |
| C1_12510W_A | -3.04 RAX2  |
| C7_01550W_A | -3.04 BEM2  |
| CR_02370W_A | -2.97 ERG25 |
| C5_01440C_A | -2.96       |
| C4_01240C_A | -2.94       |
| C2_09480W_A | -2.93       |
| C3_06400C_A | -2.92       |
| C3_01800C_A | -2.9        |
| C4_01420W_A | -2.89       |
| C4_01860C_A | -2.87       |
| CR_09560C_A | -2.87       |
| C2_04430W_A | -2.86       |
| C4_02320C_A | -2.86 SOD1  |
| C5_00070W_A | -2.83 CDC11 |
| C5_02530W_A | -2.83 UAP1  |
| CR_00910W_A | -2.83       |
| C2_05740W_A | -2.82 SPO7  |
| CR_02860W_A | -2.81 RHO1  |
| C1_13110C_A | -2.79 CHS3  |
| C2_00790C_A | -2.79       |
| C2_04450W_A | -2.78       |
| C2_10310C_A | -2.78 KIP2  |
| C2_01980C_A | -2.77 SRD1  |
| CR_09580C_A | -2.77       |
| CR_07790C_A | -2.76 YHB1  |
| C3_02290W_A | -2.75       |
| C4_02930W_A | -2.75       |
| CR_00620C_A | -2.74 ARG1  |
| C1_01780C_A | -2.73 HOL4  |
| C3_05220W_A | -2.71 CDR1  |
| C5_03950W_A | -2.71       |
| C2_01890W_A | -2.7 CTF1   |
| C5_02470W_A | -2.7 INT1   |
| C5_03170C_A | -2.7        |
| C6_03070C_A | -2.7        |
| C2_01780W_A | -2.69 MSB2  |
| C1_00830W_A | -2.68       |
| C1_02470W_A | -2.68       |

|             |               |
|-------------|---------------|
| C5_01100C_A | -2.68 CLN3    |
| C1_00800C_A | -2.67 ERG2    |
| C2_06740W_A | -2.65         |
| C3_02820C_A | -2.65         |
| CR_08460W_A | -2.65 TPM2    |
| C7_03080W_A | -2.62 LMO1    |
| CR_01280C_A | -2.61         |
| C1_12200W_A | -2.6 MCD4     |
| C7_01230C_A | -2.6          |
| CR_09210W_A | -2.59 SUC1    |
| C1_14180W_A | -2.58         |
| C6_02160W_A | -2.58         |
| CR_04830C_A | -2.58         |
| C6_01960W_A | -2.57         |
| CR_06790C_A | -2.57         |
| C1_05980W_A | -2.56         |
| C2_08100W_A | -2.56         |
| C5_00890C_A | -2.56 GIT2    |
| C4_01250W_A | -2.55 NAT4    |
| C2_09420W_A | -2.54         |
| C5_00230C_A | -2.54         |
| CR_02350C_A | -2.54 GEF2    |
| C4_00120W_A | -2.53 PGA7    |
| C4_01380W_A | -2.53 ZCF27   |
| C7_02540W_A | -2.53         |
| C2_09740W_A | -2.52 SSO2    |
| C4_04850C_A | -2.52 CSR1    |
| CR_09520C_A | -2.51         |
| C3_05600W_A | -2.5 ATO6     |
| C6_00400C_A | -2.5          |
| C1_06320W_A | -2.49         |
| C1_07770W_A | -2.49 FGR6-3  |
| C5_01500C_A | -2.49 ZCF20   |
| C7_03440W_A | -2.49 SNG4    |
| C1_09430W_A | -2.47         |
| C3_02150C_A | -2.47 ERG6    |
| C6_01620W_A | -2.47         |
| C2_09700W_A | -2.46 YEA4    |
| C5_02370C_A | -2.46         |
| C6_03260W_A | -2.45         |
| C7_01840W_A | -2.44 IQG1    |
| C2_08340C_A | -2.43         |
| CR_04630C_A | -2.43 DIT2    |
| C1_04620W_A | -2.42         |
| C4_04250W_A | -2.42         |
| C4_05530W_A | -2.42 FGR6-10 |
| C1_08620W_A | -2.41 CTR2    |

|             |             |
|-------------|-------------|
| C7_03410C_A | -2.41       |
| C2_05030C_A | -2.4 RHO3   |
| C1_13780W_A | -2.39 MYO2  |
| C5_03650C_A | -2.39       |
| C2_09760W_A | -2.38       |
| C4_05900C_A | -2.38       |
| C1_10060C_A | -2.36       |
| C2_06870C_A | -2.36 PST1  |
| C1_11730W_A | -2.34       |
| C2_07220W_A | -2.34       |
| C5_01650C_A | -2.34 MYO1  |
| C1_09120W_A | -2.33 IPT1  |
| C1_11400C_A | -2.33 GIN4  |
| C2_05260W_A | -2.33 BUD14 |
| C7_03420C_A | -2.32 SNG3  |
| CR_04660C_A | -2.32 UGP1  |
| C2_03790C_A | -2.31 ASR3  |
| C2_03320W_A | -2.3 CHK1   |
| C2_09220W_A | -2.3 DDR48  |
| C4_04760C_A | -2.3        |
| C5_02780W_A | -2.3        |
| CR_05690W_A | -2.3 MCT1   |
| C2_08140C_A | -2.29 PHM7  |
| C5_01680C_A | -2.29 CCN1  |
| C6_03310W_A | -2.29       |
| C1_11250W_A | -2.28       |
| CR_04570C_A | -2.28 CDC10 |
| C1_05960W_A | -2.27 PGA45 |
| C3_01940C_A | -2.27       |
| C4_00130W_A | -2.27 RBT5  |
| C1_00350C_A | -2.26 HMX1  |
| C1_03710C_A | -2.26 MSB1  |
| C3_02930W_A | -2.26       |
| CR_06740W_A | -2.26       |
| C1_00580W_A | -2.25       |
| C1_03210C_A | -2.25 CDC12 |
| C4_05980C_A | -2.25       |
| C4_06770W_A | -2.25       |
| CR_09020C_A | -2.25 CHS2  |
| C1_01260C_A | -2.24 TRS20 |
| C2_04310W_A | -2.23 ERG10 |
| C3_05650W_A | -2.23 YCK2  |
| CR_04770C_A | -2.22       |
| C3_05350C_A | -2.21 SMI1B |
| CR_09050C_A | -2.21       |
| C1_13900C_A | -2.2 LCB2   |
| C1_01620C_A | -2.19       |

|             |            |
|-------------|------------|
| C1_12220W_A | -2.19 CDC6 |
| C4_01920W_A | -2.18      |
| CR_06440C_A | -2.18 BCR1 |
| C1_00840C_A | -2.17 NRM1 |
| C3_07200C_A | -2.17 ZFU2 |
| C1_13740W_A | -2.16 KAR9 |
| C3_00760W_A | -2.16 ERG4 |
| C3_04490W_A | -2.16 RAX1 |
| C1_02870W_A | -2.14 YPT7 |
| C2_01340W_A | -2.14      |
| C3_01530C_A | -2.14 CAS4 |
| C3_04320W_A | -2.14 VAM3 |
| C4_00110C_A | -2.14 FRP1 |
| C2_05580W_A | -2.13      |
| C2_06730W_A | -2.13 LSP1 |
| C1_04210C_A | -2.12 CDC3 |
| C4_04430W_A | -2.12 MRP8 |
| C4_04590W_A | -2.12 SCS7 |
| CR_09690C_A | -2.12 PLB3 |
| C3_05880C_A | -2.11      |
| C5_04840C_A | -2.1       |
| C6_02860W_A | -2.1 STE23 |
| C6_02200C_A | -2.09      |
| C1_12470W_A | -2.07      |
| C4_01230C_A | -2.07      |
| C5_04260W_A | -2.07      |
| C7_00230W_A | -2.07      |
| CR_02360W_A | -2.07 IDP2 |
| C1_03080C_A | -2.06 TEM1 |
| CR_03780C_A | -2.05      |
| CR_10610C_A | -2.05      |
| C2_03610W_A | -2.04 FMO2 |
| C3_02270W_A | -2.04      |
| C3_05000W_A | -2.04 RDI1 |
| C4_05440C_A | -2.04      |
| C6_02130C_A | -2.04 CTF5 |
| C7_02770W_A | -2.04 CHS1 |
| CR_05540C_A | -2.04      |
| C3_06420C_A | -2.02      |
| C7_00760C_A | -2.02      |
| CR_02650C_A | -2.01 DRE2 |
| C1_12740W_A | -2         |
| C4_00620C_A | -2 SPC2    |
| C4_05080C_A | -2         |
| C6_03230W_A | -2 ARG3    |
