# Supplementary material for: Reprogramming in Candida albicans Gene Expression Network under Butanol Stress Abrogates Hyphal Development
Source: MDPI journal article supplement (doi:10.3390/ijms242417227), 2023-12-07
Supplement: s1 [file s1]

Table S1: Differential gene expression when the serum and serum with butanol data were compared to 0 min gene expression data.

| <b>S20 vs Control</b> |             |          |          |
|-----------------------|-------------|----------|----------|
| Name                  | Fold change | P-value  | GeneID   |
| ECE1                  | 7958.741    | 3.01E-07 | 3646814  |
| HWP1                  | 3569.387    | 3.48E-18 | 3645372  |
| C1_13100W_A           | 1651.271    | 1.6E-05  | 30515073 |
| HGT12                 | 1149.695    | 5.4E-05  | 3638048  |
| CDC11                 | 904.3553    | 6.89E-05 | 3647888  |
| CRH11                 | 522.4321    | 2.49E-11 | 3637905  |
| MLC1                  | 377.32      | 0.000548 | 30515387 |
| DPM2                  | 317.9686    | 0.000723 | 30515325 |
| DPM1                  | 297.1951    | 5.36E-10 | 3640700  |
| C3_06670C_A           | 285.6126    | 0.000904 | 3642254  |
| C6_02210W_A           | 278.3368    | 0.000963 | 3645864  |
| RBT1                  | 270.0715    | 6.43E-18 | 3645377  |
| CDC10                 | 255.1713    | 1.42E-09 | 3640947  |
| C7_02280W_A           | 247.4458    | 0.001363 | 3636999  |
| VMA10                 | 243.1235    | 0.001297 | 3645215  |
| HYR1                  | 242.5002    | 1.33E-08 | 3636226  |
| C4_05390W_A           | 237.0342    | 0.001371 | 3646951  |
| C3_06750W_A           | 219.3537    | 0.001816 | 30515219 |
| PXP2                  | 219.3371    | 0.002496 | 3636558  |
| UME6                  | 217.4576    | 3.52E-09 | 3647522  |
| PGA31                 | 216.6754    | 0.001657 | 3641226  |
| COG4                  | 204.6403    | 0.001884 | 3645571  |
| MCD4                  | 202.9417    | 0.00191  | 3642036  |
| C3_02530W_A           | 194.096     | 0.002059 | 30515189 |
| C1_04180W_A           | 190.5388    | 0.00213  | 3644716  |
| C5_03730W_A           | 185.6719    | 0.002261 | 3647238  |
| CR_05310W_A           | 176.3992    | 0.002548 | 3648125  |
| C6_02140W_A           | 153.7904    | 0.003248 | 3645886  |
| ALI1                  | 142.764     | 0.003987 | 3636635  |
| FAD1                  | 139.3284    | 0.003856 | 3634930  |
| SAM51                 | 134.2017    | 0.004167 | 3641582  |
| PDI1                  | 130.785     | 1.37E-26 | 3641367  |
| MAL31                 | 128.3534    | 2.28E-06 | 3636420  |
| ECM331                | 125.8235    | 0.004567 | 3637731  |
| SHE3                  | 125.6725    | 7.01E-08 | 3639277  |
| C4_02460W_A           | 125.5132    | 0.004676 | 3637844  |
| ALS3                  | 123.0369    | 1.58E-34 | 3647965  |
| PMI1                  | 121.8039    | 3.7E-11  | 3643795  |
| DDR48                 | 117.7729    | 2.68E-23 | 3644061  |
| OST1                  | 110.6985    | 1.89E-07 | 3643657  |

|             |          |          |          |
|-------------|----------|----------|----------|
| LDG3        | 108.009  | 0.006972 | 3637001  |
| PMT2        | 105.905  | 3.21E-23 | 3638538  |
| LYS22       | 104.883  | 2.03E-16 | 3645466  |
| CR_06380C_A | 101.6123 | 0.006929 | 3648139  |
| DPP1        | 101.2769 | 0.00708  | 3644537  |
| C1_03600W_A | 100.4187 | 4.29E-07 | 3636880  |
| FGR6-10     | 100.1884 | 0.007132 | 3641770  |
| MRV8        | 98.45328 | 0.00739  | 3636450  |
| LYS9        | 95.92124 | 4.18E-18 | 3642279  |
| ERV46       | 95.47855 | 1.48E-10 | 3644129  |
| C6_00400C_A | 89.27913 | 0.008923 | 3646087  |
| C4_04380C_A | 88.59897 | 6.24E-07 | 30515266 |
| C3_02620C_A | 86.29842 | 0.00965  | 3638326  |
| DOG1        | 83.70895 | 8.52E-07 | 3641597  |
| C4_00250W_A | 82.379   | 0.016774 | 3645035  |
| C7_00240W_A | 81.16817 | 0.010739 | 3637980  |
| C6_02100W_A | 81.13577 | 4.82E-18 | 3647554  |
| C2_10010C_A | 78.93747 | 0.010855 | 3643962  |
| C3_07840C_A | 77.6665  | 0.010909 | 3647465  |
| PHR1        | 76.81544 | 1.36E-27 | 3641108  |
| ERV29       | 76.43994 | 2.11E-16 | 3635672  |
| SEC21       | 74.8635  | 8.45E-20 | 3644786  |
| C1_10560C_A | 74.64634 | 0.011727 | 3647196  |
| THR1        | 74.28048 | 1.59E-06 | 3641572  |
| PMM1        | 71.07043 | 2.47E-13 | 3636852  |
| FRP2        | 70.09336 | 8.55E-13 | 3638008  |
| AGM1        | 68.3892  | 2.9E-06  | 3636138  |
| YNK1        | 67.09687 | 3.96E-17 | 3637746  |
| SEC23       | 66.66096 | 1.39E-21 | 3641818  |
| SOD5        | 65.97764 | 3.25E-11 | 3638886  |
| ERV25       | 65.48139 | 2.76E-13 | 3642243  |
| CR_01490C_A | 65.40035 | 1.36E-11 | 30515376 |
| CR_09330C_A | 65.31349 | 7.66E-20 | 3641899  |
| PMT4        | 64.11715 | 1.01E-19 | 3644096  |
| CDC28       | 63.1867  | 5.36E-06 | 3644838  |
| TUB2        | 60.88163 | 8.3E-11  | 3639329  |
| HHT21       | 59.96082 | 6.24E-06 | 3644707  |
| CWH43       | 59.89497 | 4.66E-11 | 3640389  |
| CAR1        | 59.84384 | 7.8E-19  | 3636503  |
| C6_02180W_A | 59.81555 | 0.017052 | 3645861  |
| HOM6        | 59.42902 | 6.09E-06 | 3636815  |
| LSC1        | 58.7424  | 1.27E-17 | 3640199  |
| ERG28       | 58.70052 | 0.017532 | 3638833  |
| C6_01880W_A | 58.6654  | 0.017604 | 3641599  |
| C1_02760W_A | 57.81004 | 1.33E-12 | 3636870  |
| EMP24       | 56.48249 | 2.69E-08 | 3647247  |
| C2_05720C_A | 55.85911 | 8.22E-11 | 3645574  |

|             |          |          |          |
|-------------|----------|----------|----------|
| DUR3        | 55.44931 | 0.021498 | 3644760  |
| CR_04650W_A | 54.35216 | 0.021776 | 30515396 |
| CR_00280C_A | 52.45718 | 0.021276 | 3639719  |
| CR_04490C_A | 52.17075 | 0.02127  | 3641013  |
| C6_00710W_A | 52.16029 | 0.021305 | 3647073  |
| TEM1        | 51.64514 | 0.021629 | 3636923  |
| SEC22       | 51.61951 | 1.58E-05 | 30515391 |
| C1_02100W_A | 51.61404 | 0.021683 | 3644578  |
| ARF3        | 51.28244 | 1.33E-05 | 3636628  |
| C3_06730W_A | 50.45784 | 0.022713 | 3638504  |
| RET2        | 50.15279 | 6.92E-16 | 3637714  |
| C7_02310C_A | 48.71631 | 0.024178 | 3636936  |
| C4_02600C_A | 48.27653 | 0.024882 | 3637912  |
| PTP3        | 48.22755 | 2.52E-23 | 3638940  |
| HRT2        | 48.20499 | 1.66E-05 | 3635709  |
| FGR6-3      | 48.01583 | 0.024434 | 3647954  |
| C1_11950W_A | 47.98688 | 0.024488 | 3642045  |
| C5_03000C_A | 47.4661  | 0.02485  | 3637818  |
| C7_01100C_A | 47.44126 | 0.025406 | 3637948  |
| TUB1        | 47.32587 | 1.99E-15 | 3641930  |
| ACP12       | 46.53032 | 2.06E-05 | 3637361  |
| C2_05510C_A | 46.28917 | 0.025874 | 3643420  |
| ACO2        | 45.8809  | 1.14E-09 | 3646708  |
| C1_07490C_A | 45.85821 | 0.027986 | 3646666  |
| HET1        | 45.18248 | 4.57E-19 | 3647897  |
| GFA1        | 45.15758 | 1.55E-22 | 3636557  |
| ERP5        | 44.86431 | 1.76E-11 | 30515046 |
| TOS1        | 43.86055 | 3.45E-21 | 3636566  |
| SNZ1        | 43.5031  | 8E-10    | 3636803  |
| KAR3        | 42.69521 | 0.029395 | 3644078  |
| C1_07920W_A | 42.68658 | 0.029124 | 30515026 |
| SSR1        | 42.4979  | 1.96E-15 | 3638055  |
| TNA1        | 42.34661 | 0.032751 | 3637827  |
| LYS12       | 41.92106 | 6.35E-18 | 3640134  |
| DPM3        | 41.85542 | 1.07E-07 | 30515245 |
| CEK1        | 41.68451 | 2.19E-09 | 3642789  |
| CR_00990W_A | 41.47561 | 3.8E-05  | 3640425  |
| CR_05130C_A | 41.42032 | 3.47E-05 | 3646401  |
| CSR1        | 41.07076 | 2.59E-09 | 3641162  |
| CR_09230C_A | 41.02465 | 3.2E-09  | 3641918  |
| PMT1        | 40.90119 | 4.79E-20 | 3641393  |
| ATP18       | 40.4522  | 4.7E-05  | 30515084 |
| C7_00680W_A | 40.13458 | 0.032274 | 3637967  |
| SEC13       | 39.95099 | 1.09E-15 | 3638425  |
| SEF2        | 39.32218 | 1.44E-06 | 3647052  |
| ATP19       | 38.92754 | 5.3E-05  | 30515061 |
| C2_05290C_A | 38.73497 | 9.05E-09 | 3643472  |

|             |          |          |          |
|-------------|----------|----------|----------|
| ATP1        | 38.52763 | 1.97E-21 | 3646134  |
| SAR1        | 38.50827 | 1.45E-14 | 3645865  |
| C7_03650W_A | 37.97763 | 0.033919 | 3646224  |
| PGA63       | 36.90428 | 2.67E-19 | 3639524  |
| C5_05020C_A | 36.65607 | 5E-11    | 3636486  |
| DAG7        | 36.61615 | 5.21E-10 | 3635607  |
| C5_01230C_A | 36.54719 | 7.6E-13  | 3642618  |
| C2_09590C_A | 36.27805 | 0.036843 | 3643800  |
| SRB1        | 36.09237 | 6.27E-20 | 3647454  |
| C6_02190C_A | 35.86242 | 4.03E-07 | 3645862  |
| GDE1        | 35.71588 | 3.5E-20  | 3636505  |
| C1_07260C_A | 35.71094 | 7.89E-05 | 3644456  |
| MNT1        | 35.29577 | 6.54E-20 | 3636585  |
| LYS1        | 35.2358  | 1.02E-14 | 6335429  |
| GUP1        | 34.88437 | 0.0399   | 3636171  |
| SEC12       | 34.82935 | 1.43E-15 | 3641639  |
| ARC18       | 34.42805 | 0.039704 | 3644056  |
| CFL11       | 34.37996 | 1E-05    | 3646622  |
| C3_07130W_A | 34.35286 | 0.04006  | 3638440  |
| ENA21       | 34.15509 | 1.03E-21 | 3641392  |
| ACT1        | 33.98124 | 6.39E-21 | 3636195  |
| CR_05800C_A | 33.63931 | 8.91E-05 | 3646706  |
| C1_06700W_A | 33.52773 | 9.21E-05 | 3639511  |
| C1_05100W_A | 33.25602 | 0.041623 | 3647669  |
| CR_10130W_A | 33.22728 | 0.04214  | 3638970  |
| C4_06140C_A | 33.04314 | 9.62E-05 | 3642821  |
| MTS1        | 32.54563 | 1.08E-18 | 3634873  |
| RFA2        | 32.29695 | 0.000265 | 3643506  |
| C5_03930C_A | 32.24598 | 2.91E-08 | 3647447  |
| C4_01140C_A | 32.05701 | 0.043832 | 3635657  |
| HIS1        | 31.84594 | 6.51E-12 | 3636501  |
| ILV5        | 31.70479 | 7.1E-19  | 3644012  |
| C1_06340W_A | 31.60927 | 2.55E-08 | 3639499  |
| C6_01460C_A | 31.55086 | 9.58E-12 | 3641623  |
| C7_00670C_A | 31.45914 | 6.29E-12 | 3638024  |
| CYT1        | 31.39317 | 3.4E-13  | 3643441  |
| LYS4        | 31.08726 | 4.26E-11 | 3641180  |
| AAP1        | 31.05959 | 1.57E-08 | 3647397  |
| COF1        | 30.72591 | 1.99E-16 | 30515293 |
| CDC12       | 30.66979 | 1.83E-15 | 3636809  |
| C1_03150C_A | 30.65878 | 0.049867 | 30514976 |
| CR_04730W_A | 30.4504  | 2.11E-08 | 3647305  |
| OSH3        | 30.41898 | 6.05E-13 | 3645368  |
| C1_03940W_A | 30.31639 | 5.23E-06 | 3646415  |
| CEX1        | 30.2589  | 1.27E-08 | 3644913  |
| CR_09090C_A | 30.05499 | 8.33E-11 | 3641927  |
| GIG1        | 29.84201 | 0.049114 | 3644712  |

|             |          |          |          |
|-------------|----------|----------|----------|
| AMO2        | 29.25874 | 7.02E-08 | 3648021  |
| C1_06050C_A | 28.98462 | 0.000197 | 30515003 |
| C5_00080C_A | 28.77964 | 9.72E-14 | 3647886  |
| CMP1        | 28.66111 | 4.72E-11 | 3639328  |
| DOA1        | 28.59486 | 1.15E-14 | 3634871  |
| CR_06170W_A | 28.13533 | 0.00023  | 3644865  |
| QCR2        | 28.01145 | 7.26E-14 | 3646352  |
| C4_04980W_A | 27.84593 | 3.7E-08  | 3641167  |
| C1_01210W_A | 27.83976 | 1.72E-09 | 3640209  |
| BGL2        | 27.02286 | 1.64E-17 | 3635691  |
| CR_03470W_A | 27.00187 | 0.000251 | 3643198  |
| C1_04780C_A | 26.64033 | 1.3E-09  | 3644774  |
| ERG6        | 26.63832 | 1.35E-09 | 3636655  |
| POL30       | 26.52104 | 0.000791 | 3635583  |
| MYO2        | 26.45777 | 5.76E-16 | 3636140  |
| KAR2        | 26.33983 | 7.89E-18 | 3638830  |
| BFR1        | 26.29979 | 1.84E-17 | 3635579  |
| EXG2        | 26.24369 | 4.46E-07 | 3636816  |
| CR_03000C_A | 26.12117 | 0.000367 | 3642597  |
| CHS2        | 25.96326 | 8.6E-19  | 3641893  |
| SAC1        | 25.8608  | 1.55E-09 | 3634864  |
| JEM1        | 25.7822  | 5.28E-06 | 3643876  |
| ERG11       | 25.34444 | 1.21E-09 | 3641571  |
| C2_10200W_A | 25.31222 | 0.000416 | 3643928  |
| MAL2        | 25.02093 | 4.81E-06 | 3638946  |
| ERG26       | 24.84065 | 2.14E-07 | 3642803  |
| C1_04430C_A | 24.52721 | 0.000459 | 30514986 |
| TSA1        | 24.20472 | 3.17E-16 | 3642269  |
| C4_00710W_A | 24.15143 | 6.47E-06 | 3645750  |
| CLC1        | 24.03938 | 2.22E-13 | 3635662  |
| C1_11860W_A | 23.93868 | 5.81E-18 | 3642009  |
| C5_02920W_A | 23.93345 | 0.000597 | 3637751  |
| SEC20       | 23.89999 | 7.52E-06 | 3639206  |
| C2_05130W_A | 23.68147 | 5.68E-09 | 3643458  |
| STT3        | 23.55962 | 2.86E-14 | 3635743  |
| ATO1        | 23.38155 | 1.09E-05 | 3647761  |
| ATP3        | 22.85708 | 2.58E-18 | 3640387  |
| MSB1        | 22.74738 | 1E-08    | 3648218  |
| C2_07540W_A | 22.63995 | 0.00082  | 3645222  |
| LSC2        | 22.61663 | 1.08E-16 | 3646618  |
| GDH3        | 22.48015 | 3.06E-13 | 3648086  |
| LHS1        | 22.41795 | 2.69E-15 | 3643032  |
| CBR1        | 22.31518 | 5.42E-10 | 3646961  |
| SEC18       | 22.18444 | 3.19E-15 | 3636208  |
| COX5        | 22.12744 | 4.73E-12 | 3634768  |
| CR_03520C_A | 21.90162 | 4.38E-10 | 3643203  |
| CR_03330W_A | 21.87483 | 0.000721 | 3645095  |

|             |          |          |          |
|-------------|----------|----------|----------|
| C1_04010C_A | 21.87483 | 0.000723 | 3646426  |
| TSA1B       | 21.77444 | 6.04E-15 | 30515214 |
| QCR8        | 21.62783 | 5.7E-10  | 30515112 |
| LAP41       | 21.56629 | 5.95E-12 | 3636653  |
| CWH41       | 21.12078 | 9.11E-10 | 3646533  |
| C1_06920C_A | 20.99517 | 0.00083  | 3639525  |
| CR_10530W_A | 20.95872 | 0.000945 | 3639042  |
| TVP18       | 20.94709 | 1.33E-06 | 3634844  |
| ECM33       | 20.90905 | 3.32E-16 | 30514977 |
| RBT4        | 20.63077 | 1.38E-09 | 3639534  |
| TRP4        | 20.62597 | 2.19E-05 | 3642904  |
| SPC3        | 20.57005 | 1.49E-07 | 3636121  |
| MNS1        | 20.39878 | 4.11E-12 | 3644692  |
| MDH1-1      | 20.3256  | 2.55E-15 | 3635636  |
| C7_01710W_A | 20.3115  | 3.91E-12 | 3637012  |
| C6_04100W_A | 20.03595 | 2.36E-12 | 3647836  |
| C1_02500W_A | 20.00657 | 0.001101 | 3636795  |
| SEP7        | 19.98619 | 5.6E-08  | 3644596  |
| HAT1        | 19.97685 | 2.38E-05 | 3644770  |
| C2_07140W_A | 19.9247  | 8.11E-10 | 3643508  |
| POL1        | 19.78593 | 3.47E-08 | 3635144  |
| SPC2        | 19.7489  | 2.93E-05 | 3645769  |
| C3_00520W_A | 19.72695 | 2.87E-05 | 3640513  |
| CR_00130C_A | 19.72235 | 1.11E-09 | 3639709  |
| RGD1        | 19.68014 | 8.13E-07 | 3639868  |
| ADK1        | 19.64284 | 7.69E-14 | 3644533  |
| C2_03970W_A | 19.41043 | 0.001318 | 3637419  |
| C4_04440W_A | 19.30303 | 1.6E-11  | 3641177  |
| PGA10       | 19.28266 | 3.68E-05 | 3645009  |
| FAV2        | 19.24943 | 0.001464 | 3647236  |
| PYC2        | 19.13338 | 9.39E-09 | 3637323  |
| SEC62       | 19.1106  | 9.34E-12 | 3636860  |
| APL4        | 18.98066 | 1.91E-11 | 3642565  |
| VMA2        | 18.97098 | 4.76E-16 | 3646710  |
| C2_07650C_A | 18.94856 | 3.34E-05 | 3642342  |
| CYP1        | 18.87452 | 2.34E-17 | 3636978  |
| ATP2        | 18.63229 | 4.52E-15 | 3645039  |
| SSA2        | 18.60789 | 4.15E-14 | 3644711  |
| APL2        | 18.50979 | 2.8E-11  | 3638343  |
| C1_07590C_A | 18.2851  | 1.82E-07 | 3646673  |
| FRE7        | 18.06608 | 2.7E-15  | 3646024  |
| C2_07010W_A | 18.04905 | 1.73E-09 | 3643535  |
| ASH2        | 18.04604 | 0.001603 | 3636445  |
| MCM2        | 18.03735 | 0.00152  | 3643197  |
| HTA2        | 18.03022 | 5.09E-07 | 3644715  |
| PGA6        | 17.82562 | 0.001884 | 3634774  |
| CR_05500C_A | 17.73072 | 0.001557 | 3647598  |

|             |          |          |          |
|-------------|----------|----------|----------|
| DUR1,2      | 17.67577 | 9.88E-10 | 3644771  |
| C7_04000W_A | 17.65607 | 7.73E-09 | 3643114  |
| PGA54       | 17.655   | 3.76E-10 | 3637929  |
| C1_06480C_A | 17.61812 | 1.14E-10 | 30515008 |
| SEC61       | 17.57487 | 6.02E-15 | 3647462  |
| C5_02210W_A | 17.55785 | 1.42E-08 | 3637759  |
| C1_14320C_A | 17.52059 | 0.001704 | 3643316  |
| C1_01190C_A | 17.39343 | 7.37E-05 | 3640207  |
| FRE30       | 17.15163 | 1.22E-15 | 3646025  |
| C6_03130W_A | 17.05031 | 6.27E-06 | 30515341 |
| CR_03950W_A | 17.00788 | 0.001798 | 3640960  |
| C2_07420W_A | 16.97778 | 8.72E-09 | 3645202  |
| C3_02140C_A | 16.95698 | 1.28E-05 | 3636656  |
| PLB5        | 16.86549 | 5.63E-10 | 3640750  |
| C2_09040W_A | 16.59808 | 4.17E-08 | 3645792  |
| SWI6        | 16.50497 | 0.001969 | 3634932  |
| HGT1        | 16.40609 | 1.98E-13 | 3645420  |
| C5_02380W_A | 16.39438 | 3.02E-13 | 3637794  |
| C3_07230W_A | 16.35838 | 4.22E-11 | 3638531  |
| ACB1        | 16.34404 | 4.97E-09 | 30515350 |
| HIS5        | 16.25675 | 8.24E-05 | 3645756  |
| CHO1        | 16.23072 | 1.36E-06 | 3644557  |
| FMA1        | 16.21731 | 0.00413  | 3647986  |
| TAL1        | 16.12997 | 8.4E-15  | 3643225  |
| ASK1        | 16.06027 | 0.00229  | 3635656  |
| CR_04080C_A | 16.04207 | 4.65E-15 | 3641023  |
| ACO1        | 15.9938  | 4.53E-11 | 3642090  |
| GND1        | 15.88623 | 2.05E-13 | 3636131  |
| DPP3        | 15.87757 | 2.05E-06 | 3636942  |
| SGA1        | 15.86014 | 7.61E-06 | 3636652  |
| TPM2        | 15.72683 | 9.01E-14 | 30515441 |
| C1_09980C_A | 15.71929 | 8.98E-05 | 3634863  |
| CAR2        | 15.64847 | 7.34E-09 | 3645027  |
| CUP5        | 15.61149 | 2.18E-12 | 3635174  |
| C4_01510W_A | 15.55003 | 1.04E-07 | 3635616  |
| C4_00390W_A | 15.4811  | 0.000142 | 3645016  |
| ALD5        | 15.39468 | 8.26E-11 | 3643026  |
| LAT1        | 15.38238 | 4.9E-15  | 3636986  |
| GLO3        | 15.35756 | 1.58E-15 | 3640556  |
| LMO1        | 15.33249 | 1.87E-13 | 3641403  |
| CIT1        | 15.30049 | 2.08E-12 | 3643201  |
| C4_05080C_A | 15.20142 | 1.04E-07 | 3641129  |
| C4_04860W_A | 15.14513 | 5.11E-07 | 3641161  |
| C2_00590W_A | 15.14413 | 0.000179 | 3638851  |
| C1_09020W_A | 15.05182 | 9.45E-07 | 3634917  |
| GRP1        | 15.01655 | 0.00016  | 3634899  |
| CYB5        | 14.99762 | 0.000176 | 3637965  |

|             |          |          |          |
|-------------|----------|----------|----------|
| C4_00020W_A | 14.95452 | 1.79E-11 | 3648053  |
| C5_03120W_A | 14.93044 | 0.003771 | 3637705  |
| SKN1        | 14.82069 | 2.9E-13  | 3641755  |
| MEP1        | 14.80247 | 3.22E-07 | 3636553  |
| AMO1        | 14.79282 | 1.4E-07  | 3642994  |
| POR1        | 14.79171 | 1.39E-13 | 3644698  |
| SEC24       | 14.75237 | 9.58E-14 | 3634939  |
| AAT1        | 14.68204 | 4.34E-11 | 3643468  |
| HIS7        | 14.66037 | 2E-08    | 3647868  |
| C2_02020W_A | 14.5807  | 2.16E-09 | 3635769  |
| C2_07550W_A | 14.49301 | 4.23E-09 | 3645221  |
| RFC5        | 14.49207 | 0.005284 | 3638890  |
| RHO3        | 14.20279 | 5.68E-09 | 3643448  |
| ACS2        | 14.19287 | 1.52E-12 | 3644710  |
| CDC3        | 14.06181 | 4.3E-13  | 3644719  |
| C1_00700W_A | 13.9201  | 0.004592 | 3639330  |
| INO1        | 13.905   | 1.04E-12 | 3638966  |
| C4_05790W_A | 13.80816 | 4.32E-08 | 3641784  |
| C2_02410W_A | 13.8035  | 6.24E-10 | 3635755  |
| SAP6        | 13.77133 | 0.008125 | 3639229  |
| C4_03290W_A | 13.76819 | 9.32E-10 | 3637887  |
| C1_05180C_A | 13.73247 | 0.004534 | 30514990 |
| BIO2        | 13.6076  | 0.0137   | 3640106  |
| STE24       | 13.55659 | 2.7E-12  | 3645040  |
| CAT2        | 13.50325 | 8.46E-13 | 3635659  |
| ABG1        | 13.49835 | 5.77E-08 | 3647715  |
| C2_06610C_A | 13.45618 | 0.004838 | 30515140 |
| ARC40       | 13.42288 | 6.57E-12 | 3644866  |
| TEF2        | 13.40452 | 1.06E-13 | 3646502  |
| MEU1        | 13.39284 | 5.08E-08 | 3645635  |
| C2_09780C_A | 13.38389 | 1.52E-09 | 3643805  |
| SEC8        | 13.36916 | 1.35E-09 | 3647078  |
| C4_05250W_A | 13.2927  | 8.29E-05 | 3646158  |
| C2_09050C_A | 13.25232 | 3.97E-06 | 3645791  |
| RIC1        | 13.23605 | 2.44E-05 | 3639331  |
| SOU1        | 13.16254 | 0.00127  | 3642799  |
| KEX2        | 13.13275 | 7.21E-13 | 3634914  |
| C1_04200C_A | 13.05469 | 3.2E-05  | 3644718  |
| CR_01080W_A | 13.02592 | 5.58E-12 | 3640381  |
| SEC72       | 13.00199 | 5.97E-09 | 3645768  |
| NUO1        | 12.99216 | 1.82E-07 | 3647100  |
| CSA1        | 12.98604 | 5.48E-09 | 3638009  |
| STV1        | 12.9296  | 4.77E-12 | 3646070  |
| PBR1        | 12.85228 | 0.006774 | 3639560  |
| SOL3        | 12.80496 | 4.33E-05 | 3646625  |
| RFC2        | 12.75777 | 3.72E-05 | 3637939  |
| RPS17B      | 12.71772 | 2.9E-10  | 30515044 |



|             |          |          |          |
|-------------|----------|----------|----------|
| CDC42       | 12.67011 | 1.71E-08 | 3646488  |
| YPT31       | 12.66146 | 3.09E-11 | 3647999  |
| PLC2        | 12.60502 | 4.78E-05 | 3642985  |
| ALG8        | 12.58623 | 0.000461 | 3636562  |
| CRD2        | 12.56596 | 0.009141 | 30515234 |
| RNR1        | 12.56213 | 1.44E-07 | 3642989  |
| MRP8        | 12.49068 | 2.18E-06 | 3641178  |
| ALS1        | 12.47132 | 1.36E-13 | 3640280  |
| PRD1        | 12.41334 | 1.58E-13 | 3642471  |
| C1_03720C_A | 12.40199 | 6.21E-09 | 3648216  |
| HHO1        | 12.39312 | 4.22E-05 | 30515358 |
| PSF2        | 12.37321 | 0.008791 | 3647534  |
| SUB2        | 12.3585  | 3.21E-12 | 3645033  |
| ASN1        | 12.33523 | 2.54E-12 | 3645790  |
| C4_04970C_A | 12.25647 | 6.23E-05 | 30515274 |
| INP51       | 12.25504 | 8.67E-06 | 3643806  |
| C2_03020C_A | 12.24664 | 6.87E-10 | 3643019  |
| ARP3        | 12.19585 | 2.33E-11 | 3643479  |
| IDH1        | 12.12122 | 1.48E-12 | 3634893  |
| C4_04600C_A | 12.10018 | 0.000561 | 3641156  |
| CR_00880W_A | 12.06119 | 0.000526 | 3640397  |
| HGT3        | 12.0585  | 0.01136  | 3643185  |
| ARC35       | 12.0102  | 4.14E-07 | 3639823  |
| CR_04860C_A | 11.95563 | 0.008948 | 3647294  |
| C4_06810C_A | 11.9397  | 1.89E-11 | 3642916  |
| ATP5        | 11.93821 | 1.41E-12 | 3640521  |
| SMC1        | 11.93284 | 0.000894 | 3643221  |
| YHB5        | 11.88682 | 3.21E-13 | 3647343  |
| THS1        | 11.84494 | 1.1E-11  | 3647882  |
| KGD2        | 11.81161 | 9.15E-14 | 3646036  |
| C5_00060C_A | 11.70026 | 1.3E-06  | 3647889  |
| LEU2        | 11.69279 | 8.14E-05 | 3638034  |
| CDC24       | 11.67287 | 1.78E-11 | 3643737  |
| PHO15       | 11.63713 | 1.19E-06 | 3644459  |
| C1_05320C_A | 11.62825 | 1.79E-06 | 3642470  |
| C3_04780C_A | 11.53891 | 9.39E-09 | 3635214  |
| SEC27       | 11.4205  | 2.53E-13 | 3645870  |
| C2_03210W_A | 11.41652 | 0.000801 | 30515098 |
| TRX1        | 11.36682 | 8.72E-10 | 3638950  |
| BMH1        | 11.36525 | 1.16E-11 | 3636810  |
| C1_09670C_A | 11.33281 | 0.012568 | 3634872  |
| C6_02480W_A | 11.31131 | 7.05E-05 | 3639170  |
| CR_00870C_A | 11.30916 | 0.009636 | 3640398  |
| IDP1        | 11.30665 | 3.02E-07 | 3647474  |
| SPE3        | 11.26307 | 3.94E-07 | 3643528  |
| RDI1        | 11.24964 | 3.89E-11 | 3635167  |
| MCM6        | 11.22829 | 0.000111 | 3640142  |

|             |          |          |          |
|-------------|----------|----------|----------|
| PFY1        | 11.17447 | 6.78E-11 | 3640703  |
| CRN1        | 11.17353 | 5.21E-11 | 3637034  |
| NUC2        | 11.14525 | 5.25E-09 | 3637030  |
| C5_04950C_A | 11.13336 | 1.05E-05 | 3636422  |
| VPS1        | 11.12113 | 4.67E-12 | 3642656  |
| CR_05360C_A | 11.12038 | 0.009644 | 3648033  |
| SGT2        | 11.11959 | 4.67E-12 | 3642978  |
| C4_04800W_A | 11.04392 | 1.63E-10 | 3641113  |
| RHB1        | 11.0236  | 0.000832 | 3635232  |
| C5_02520W_A | 11.00126 | 1.69E-05 | 3637768  |
| PRO3        | 11.00062 | 2.33E-08 | 3645036  |
| TPO3        | 10.99874 | 6.68E-06 | 3634790  |
| ERG10       | 10.9674  | 1.45E-10 | 3648275  |
| UGA32       | 10.96668 | 0.00015  | 3639333  |
| VRG4        | 10.9269  | 1.63E-09 | 3641768  |
| C1_05490C_A | 10.92572 | 4.75E-08 | 3642507  |
| C3_01070C_A | 10.81609 | 0.010648 | 3639832  |
| SEC26       | 10.79646 | 2.53E-11 | 3641005  |
| APM1        | 10.78206 | 3.71E-09 | 3636424  |
| VMA8        | 10.77252 | 7.48E-08 | 3642798  |
| EGD1        | 10.73046 | 6.15E-10 | 3645340  |
| PST3        | 10.72074 | 2.98E-10 | 3648031  |
| CDC46       | 10.71213 | 0.000384 | 3646912  |
| SSH1        | 10.69614 | 1.07E-06 | 3642504  |
| ERG2        | 10.65192 | 0.011067 | 3639347  |
| RIP1        | 10.58452 | 1.71E-10 | 3635204  |
| HHT2        | 10.57716 | 3.04E-05 | 3647326  |
| MES1        | 10.5524  | 6.27E-11 | 3636516  |
| PDB1        | 10.55141 | 1.06E-11 | 3641186  |
| MSH6        | 10.54495 | 6.69E-05 | 3636161  |
| C3_04630W_A | 10.5276  | 1E-06    | 3635189  |
| FGR34       | 10.51367 | 2.82E-09 | 3639033  |
| ERG13       | 10.47535 | 1.32E-08 | 3641881  |
| ATP4        | 10.40245 | 7.45E-12 | 3643418  |
| IHD1        | 10.37733 | 1.75E-11 | 3640291  |
| WBP1        | 10.33444 | 3.99E-11 | 3644398  |
| NHP6A       | 10.30444 | 1.43E-09 | 30515244 |
| GIN4        | 10.29277 | 7.09E-06 | 3644543  |
| C3_01020W_A | 10.26586 | 0.001196 | 3639828  |
| MIS11       | 10.26187 | 2.97E-10 | 3645732  |
| GIT2        | 10.26052 | 4.59E-09 | 3642633  |
| C1_04030W_A | 10.2562  | 0.000224 | 3646428  |
| KRE5        | 10.24166 | 5.84E-10 | 3638384  |
| FAS2        | 10.22601 | 6.27E-11 | 3635222  |
| SPF1        | 10.20648 | 1.3E-11  | 3646573  |
| CR_10440W_A | 10.19634 | 0.012019 | 3638976  |
| C1_02270C_A | 10.15691 | 1.29E-05 | 3644566  |

|             |          |          |          |
|-------------|----------|----------|----------|
| CRC1        | 10.15395 | 1.06E-08 | 3640112  |
| CR_10140W_A | 10.15164 | 6.95E-09 | 3638972  |
| CAS1        | 10.09778 | 0.000238 | 3645324  |
| FAA21       | 10.09491 | 7.77E-09 | 3638418  |
| FOX3        | 10.09341 | 3.5E-05  | 3636629  |
| VMA5        | 10.04394 | 2.51E-07 | 3642316  |
| C2_04450W_A | 10.04096 | 0.012021 | 3645467  |
| C4_06160W_A | 10.03913 | 0.001245 | 3642819  |
| FGR38       | 10.01864 | 3.24E-07 | 3645412  |
| ATP17       | 10.01064 | 1.46E-10 | 30515364 |
| ZWF1        | 9.991992 | 8.98E-10 | 3634913  |
| C3_05880C_A | 9.960498 | 7.16E-10 | 3641737  |
| NDH51       | 9.960419 | 5.06E-09 | 3645444  |
| HUT1        | 9.949748 | 0.001288 | 3638505  |
| CR_04770C_A | 9.948766 | 0.013767 | 3647302  |
| CAC2        | 9.94329  | 0.001242 | 3646978  |
| C3_06400C_A | 9.941318 | 0.001229 | 3642260  |
| C5_05230C_A | 9.920051 | 1.6E-11  | 3636470  |
| C6_02880W_A | 9.915503 | 0.013226 | 3639238  |
| MCR1        | 9.873577 | 6.28E-11 | 3647561  |
| CPH1        | 9.862307 | 1.74E-05 | 3644468  |
| C3_07820W_A | 9.81133  | 1.03E-05 | 3647463  |
| C3_01940C_A | 9.753469 | 5.58E-07 | 3636600  |
| C5_04550W_A | 9.749609 | 0.000341 | 3636508  |
| C1_11960C_A | 9.746125 | 0.013417 | 30515060 |
| C3_02820C_A | 9.730132 | 1.15E-07 | 3638419  |
| PET9        | 9.70834  | 2E-10    | 3641587  |
| C2_06770W_A | 9.696068 | 0.013731 | 3643515  |
| C2_02260W_A | 9.685127 | 2.07E-06 | 3635778  |
| HXK2        | 9.640497 | 3.08E-10 | 3641015  |
| DAP1        | 9.633401 | 0.000471 | 3641021  |
| HGT2        | 9.627447 | 3.36E-11 | 3644579  |
| PUP2        | 9.617688 | 5.32E-10 | 3646617  |
| C1_00630W_A | 9.609066 | 1.08E-05 | 3639380  |
| APL5        | 9.58311  | 6.58E-09 | 3638377  |
| ALS4        | 9.580137 | 5.21E-10 | 3647972  |
| ALG6        | 9.577169 | 1.62E-05 | 3647316  |
| C5_00840W_A | 9.575042 | 0.001479 | 3644130  |
| RPL24A      | 9.559655 | 7.1E-10  | 3641174  |
| CR_08610W_A | 9.526834 | 2.25E-05 | 3642109  |
| FUM12       | 9.521428 | 1.04E-10 | 3638489  |
| C3_06920W_A | 9.501887 | 2.12E-06 | 3638511  |
| CR_00910W_A | 9.483033 | 1.27E-09 | 30515371 |
| AGE3        | 9.46991  | 1.17E-08 | 3644565  |
| C3_01720C_A | 9.462328 | 7.76E-10 | 3636601  |
| GEA2        | 9.449598 | 1.82E-09 | 3636646  |
| AXL2        | 9.435373 | 1.19E-07 | 3641184  |

|             |          |          |         |
|-------------|----------|----------|---------|
| C1_12650C_A | 9.431305 | 0.01453  | 3646836 |
| QCR7        | 9.419272 | 3.12E-07 | 3639233 |
| ASM3        | 9.400796 | 0.001758 | 3639332 |
| C3_00470W_A | 9.390268 | 1.58E-08 | 3640520 |
| GLT1        | 9.377367 | 3.7E-05  | 3639519 |
| C7_01740C_A | 9.360896 | 8.82E-05 | 3637010 |
| IPP1        | 9.342677 | 4.11E-11 | 3643874 |
| CR_05760C_A | 9.290329 | 0.002042 | 3646695 |
| EAF6        | 9.27216  | 0.015644 | 3646494 |
| C1_09060C_A | 9.268396 | 0.015848 | 3634772 |
| C2_05850C_A | 9.259069 | 1.66E-06 | 3647472 |
| C2_05800C_A | 9.195934 | 8.26E-09 | 3645584 |
| C2_10860C_A | 9.176777 | 3E-10    | 3641233 |
| SEC34       | 9.167711 | 2.83E-09 | 3644455 |
| DSL1        | 9.165772 | 0.000428 | 3645718 |
| NPL4        | 9.156918 | 1.63E-06 | 3639820 |
| CR_00290W_A | 9.12847  | 3.55E-11 | 3639717 |
| HEM13       | 9.126206 | 1.07E-09 | 3647390 |
| YVC1        | 9.114375 | 3.13E-10 | 3642303 |
| DED81       | 9.060183 | 7.85E-11 | 3646227 |
| C3_04970C_A | 9.011876 | 5.48E-10 | 3635164 |
| SNG3        | 9.002755 | 2.06E-06 | 3646715 |
| STE23       | 8.998554 | 9.48E-11 | 3639236 |
| C3_06630W_A | 8.968933 | 0.017191 | 3642250 |
| ARE2        | 8.965871 | 6.05E-09 | 3643526 |
| KTR4        | 8.964802 | 0.017842 | 3646425 |
| C4_02420C_A | 8.959338 | 0.018478 | 3637849 |
| TRS20       | 8.880191 | 0.002606 | 3640214 |
| C7_02080W_A | 8.84059  | 0.000163 | 3637025 |
| NPT1        | 8.824424 | 1.49E-08 | 3643109 |
| VMA11       | 8.809865 | 8.84E-05 | 3637054 |
| C6_00910C_A | 8.808543 | 4.36E-10 | 3644030 |
| STE13       | 8.797481 | 7.06E-06 | 3647597 |
| SUN41       | 8.79043  | 5.49E-10 | 3647067 |
| SDH12       | 8.784664 | 1.2E-07  | 3642775 |
| C3_05550C_A | 8.778133 | 5.76E-07 | 3643659 |
| CR_05010W_A | 8.699483 | 0.002826 | 3646389 |
| C2_02310W_A | 8.687299 | 2.2E-06  | 3635809 |
| HSL1        | 8.678862 | 2.63E-06 | 3637810 |
| ZCF24       | 8.654991 | 0.00023  | 3645417 |
| C7_01500W_A | 8.64151  | 0.000642 | 3637050 |
| ROB1        | 8.639477 | 1.66E-09 | 3636212 |
| FRS2        | 8.637385 | 1.11E-10 | 3636824 |
| C5_05040W_A | 8.629831 | 9.43E-05 | 3636488 |
| ARO8        | 8.623154 | 8.51E-11 | 3638828 |
| C1_00210C_A | 8.591643 | 4.61E-11 | 3639335 |
| PPT2        | 8.591505 | 0.022926 | 3634762 |

|             |          |          |          |
|-------------|----------|----------|----------|
| ATP7        | 8.575508 | 7.7E-09  | 3646672  |
| C5_01590W_A | 8.569591 | 0.000302 | 3647041  |
| BNR1        | 8.551751 | 1.34E-05 | 3639672  |
| C1_10750C_A | 8.547663 | 0.003332 | 30515043 |
| DPB4        | 8.54757  | 0.000676 | 3638818  |
| TFP1        | 8.547363 | 7.2E-10  | 3636662  |
| CDC19       | 8.533853 | 2.27E-09 | 3643438  |
| CR_08480C_A | 8.521764 | 3.79E-05 | 30515442 |
| C1_06270W_A | 8.515179 | 2.98E-05 | 3647523  |
| CAK1        | 8.510694 | 1.29E-05 | 3637352  |
| HOM2        | 8.494869 | 8.41E-10 | 3635826  |
| IDP2        | 8.471076 | 4.69E-09 | 3644934  |
| PEX8        | 8.467099 | 0.000332 | 3647393  |
| C1_04470C_A | 8.465273 | 3.55E-05 | 3646142  |
| HGC1        | 8.435457 | 1.79E-06 | 3639349  |
| C1_12140W_A | 8.43359  | 3.2E-05  | 3642050  |
| C1_01290C_A | 8.429466 | 0.003677 | 3640184  |
| GLC3        | 8.420783 | 6.78E-10 | 3639200  |
| RHO1        | 8.405783 | 4.47E-09 | 3642564  |
| RAS1        | 8.390282 | 7.21E-11 | 3643927  |
| MUM2        | 8.389647 | 1.67E-09 | 3636432  |
| LEU1        | 8.383136 | 2.75E-06 | 3639685  |
| SHP1        | 8.358712 | 3.75E-09 | 3640083  |
| C2_09030W_A | 8.355906 | 0.022302 | 3645793  |
| C3_01610W_A | 8.339814 | 9.63E-09 | 3636664  |
| C7_01320W_A | 8.325003 | 6.31E-07 | 3645896  |
| C1_03170C_A | 8.268318 | 0.026108 | 3636805  |
| C6_00920W_A | 8.266765 | 5.61E-08 | 3644031  |
| TSC11       | 8.261844 | 0.003907 | 3645267  |
| PDX1        | 8.244515 | 1.14E-08 | 3636128  |
| C5_04410C_A | 8.230299 | 0.0014   | 3636410  |
| C6_04280W_A | 8.20978  | 1.82E-06 | 3646279  |
| CR_04850C_A | 8.209415 | 0.025259 | 3647295  |
| MET6        | 8.207207 | 1.49E-09 | 3640084  |
| ATP14       | 8.203656 | 7.38E-09 | 30515134 |
| C1_11760C_A | 8.201156 | 0.000158 | 3645328  |
| C2_01910W_A | 8.197238 | 0.023287 | 3635790  |
| C6_00770C_A | 8.190559 | 0.023922 | 3647079  |
| ARO3        | 8.188037 | 1.05E-07 | 3635770  |
| HMG1        | 8.179404 | 3.56E-07 | 3644687  |
| CR_09560C_A | 8.165431 | 0.026365 | 3647099  |
| C4_04280C_A | 8.151744 | 0.000743 | 3646846  |
| PEX11       | 8.149276 | 0.000993 | 3646288  |
| CLA4        | 8.095031 | 1.23E-08 | 3634878  |
| EGD2        | 8.049893 | 9.03E-09 | 3635284  |
| ARO4        | 8.045915 | 1.52E-09 | 3647668  |
| DCK1        | 8.02913  | 4.47E-09 | 3637383  |

|             |          |          |         |
|-------------|----------|----------|---------|
| HBR2        | 8.024514 | 1.45E-09 | 3646273 |
| MON2        | 8.022149 | 5.71E-10 | 3636201 |
| ARP1        | 8.014407 | 0.005852 | 3646349 |
| GVP36       | 7.995841 | 4.63E-05 | 3641772 |
| APM4        | 7.967126 | 0.000883 | 3642297 |
| BEM2        | 7.941723 | 1.08E-08 | 3637044 |
| FTR2        | 7.93441  | 1.9E-06  | 3643303 |
| C2_09970C_A | 7.872653 | 7.82E-10 | 3643820 |
| C6_03960W_A | 7.860531 | 1.9E-09  | 3640269 |
| UBA2        | 7.84999  | 8.16E-06 | 3640701 |
| TPD3        | 7.835594 | 7.75E-09 | 3638512 |
| C2_09100C_A | 7.833991 | 6.55E-05 | 3644113 |
| CR_07350W_A | 7.804532 | 7.22E-09 | 3646055 |
| MNN12       | 7.799779 | 1.64E-09 | 3634904 |
| C2_03340W_A | 7.789965 | 8.18E-06 | 3637392 |
| C4_01840C_A | 7.776357 | 1.34E-05 | 3635592 |
| C7_00150W_A | 7.756562 | 1.52E-08 | 3637973 |
| C3_02290W_A | 7.728547 | 5.87E-07 | 3636556 |
| RAD52       | 7.720498 | 0.000378 | 3647148 |
| C3_02210C_A | 7.702235 | 1.03E-05 | 3636641 |
| OPT6        | 7.695194 | 4.76E-06 | 3635603 |
| TOM20       | 7.6912   | 2.41E-06 | 3636817 |
| C5_02050W_A | 7.682001 | 3.78E-09 | 3643768 |
| IFA4        | 7.659863 | 0.005965 | 3645454 |
| C1_10540C_A | 7.658558 | 0.000557 | 3647193 |
| C5_05200C_A | 7.657644 | 8.29E-05 | 3636467 |
| PDA1        | 7.656961 | 3.39E-08 | 3642902 |
| MRV2        | 7.636262 | 1.33E-05 | 3636545 |
| NGT1        | 7.62659  | 0.039355 | 3640573 |
| C6_03950C_A | 7.619357 | 0.000394 | 3640268 |
| C1_14530W_A | 7.556085 | 7.38E-08 | 3643333 |
| KSR1        | 7.535887 | 0.000453 | 3646052 |
| SDH2        | 7.526129 | 4.75E-06 | 3646397 |
| CDC21       | 7.486637 | 0.038748 | 3643463 |
| GNA1        | 7.475239 | 3.48E-05 | 3637397 |
| SFL2        | 7.467464 | 1.21E-07 | 3636434 |
| MPT5        | 7.465693 | 2.83E-06 | 3636205 |
| OPI3        | 7.424515 | 0.030975 | 3642277 |
| SNL1        | 7.421496 | 5.6E-06  | 3647192 |
| C5_04150C_A | 7.421134 | 0.001784 | 3636525 |
| C7_03800W_A | 7.416783 | 0.001398 | 3643150 |
| TYR1        | 7.328819 | 2.59E-05 | 3635639 |
| RFA1        | 7.308874 | 7.25E-05 | 3638823 |
| HHF1        | 7.28578  | 5.18E-06 | 3644705 |
| C4_07080C_A | 7.261085 | 0.008909 | 3642905 |
| NIF3        | 7.256648 | 0.000117 | 3646527 |
| SER33       | 7.238783 | 4.92E-09 | 3642030 |

|             |          |          |          |
|-------------|----------|----------|----------|
| APE3        | 7.229659 | 0.001654 | 3643875  |
| TMA19       | 7.21013  | 3.53E-08 | 3640399  |
| C1_01800W_A | 7.199881 | 0.007338 | 3645407  |
| FESUR1      | 7.186711 | 3.16E-07 | 3638514  |
| RPP2A       | 7.177218 | 1.34E-07 | 30515439 |
| HOM3        | 7.175343 | 0.000229 | 3641771  |
| VMA7        | 7.172469 | 0.001831 | 3637332  |
| THR4        | 7.172189 | 5.91E-09 | 3637711  |
| C7_01460C_A | 7.163717 | 0.001413 | 3636958  |
| C4_00770C_A | 7.15653  | 2.27E-05 | 3645760  |
| RPS15       | 7.141312 | 2.61E-08 | 3635194  |
| PMR1        | 7.126377 | 2.2E-08  | 3638043  |
| C3_04080W_A | 7.125874 | 6.02E-08 | 30515200 |
| CR_02630C_A | 7.123663 | 0.038627 | 3642568  |
| SCP1        | 7.11328  | 0.037355 | 3646554  |
| C2_07110C_A | 7.097394 | 0.000174 | 3643505  |
| C3_01590W_A | 7.095726 | 0.000681 | 3636666  |
| YBN5        | 7.085915 | 1.06E-08 | 3644781  |
| AIP2        | 7.054604 | 2.49E-09 | 3638393  |
| RTS1        | 7.034261 | 1.54E-09 | 3646557  |
| C1_02970W_A | 7.033437 | 1.32E-07 | 3636835  |
| C4_03050C_A | 7.032876 | 2.17E-05 | 3637930  |
| C1_06630W_A | 7.030902 | 0.001512 | 3639544  |
| SNF5        | 7.026929 | 5.26E-05 | 3648297  |
| C1_02290C_A | 7.026187 | 0.000548 | 3644568  |
| SOD1        | 6.990539 | 0.000347 | 30515248 |
| BIO32       | 6.978721 | 0.001634 | 3643430  |
| C1_02650W_A | 6.972347 | 1.98E-06 | 3636818  |
| C2_08930W_A | 6.966829 | 1.3E-07  | 3645795  |
| C1_10310W_A | 6.957902 | 0.040324 | 3634906  |
| MVB12       | 6.946159 | 0.000746 | 30515400 |
| C2_04330C_A | 6.934901 | 2.05E-06 | 3645453  |
| C3_01510W_A | 6.920664 | 8.3E-05  | 3636571  |
| C1_00420W_A | 6.8769   | 2.32E-06 | 3639286  |
| C3_02570W_A | 6.839876 | 1.13E-05 | 3638375  |
| HEM15       | 6.815579 | 2.36E-08 | 3645211  |
| C4_04920W_A | 6.814817 | 0.000808 | 3641172  |
| C7_03350C_A | 6.804703 | 0.041586 | 3646722  |
| C1_03490W_A | 6.780699 | 8.37E-06 | 3636914  |
| CR_00060C_A | 6.766078 | 6.37E-07 | 3639673  |
| CR_05200C_A | 6.710771 | 0.000844 | 3648080  |
| MP65        | 6.709756 | 1.73E-07 | 3643951  |
| C1_00450C_A | 6.694454 | 5.32E-05 | 30514955 |
| C2_00730C_A | 6.682478 | 1.91E-05 | 3638913  |
| C2_09650W_A | 6.673424 | 1.28E-08 | 3643794  |
| C1_12180C_A | 6.668903 | 0.002328 | 3642038  |
| C7_03660C_A | 6.665825 | 9.72E-09 | 3646226  |

|             |          |          |          |
|-------------|----------|----------|----------|
| C3_03160C_A | 6.664993 | 0.010281 | 3638424  |
| CDC50       | 6.658991 | 5.82E-06 | 3640302  |
| DPP2        | 6.65729  | 0.010497 | 3645341  |
| CR_01100C_A | 6.656556 | 0.043722 | 3640378  |
| CR_05860W_A | 6.655793 | 3.95E-06 | 3646703  |
| MNN24       | 6.647387 | 7.8E-08  | 3638789  |
| PXA2        | 6.643611 | 1.19E-06 | 3642055  |
| DUN1        | 6.63952  | 0.002404 | 3636494  |
| LYS2        | 6.638822 | 2.38E-08 | 3636875  |
| ACC1        | 6.632364 | 1.09E-07 | 3639688  |
| RPL8B       | 6.630815 | 6.2E-08  | 3635198  |
| C4_02930W_A | 6.630559 | 0.011304 | 3637876  |
| C1_13270W_A | 6.624755 | 0.000299 | 3636144  |
| C1_12400C_A | 6.619204 | 0.000931 | 3642059  |
| C2_10830W_A | 6.612823 | 0.015088 | 30515170 |
| RAD53       | 6.592654 | 0.012228 | 3645633  |
| C1_10510W_A | 6.590793 | 0.046773 | 3647189  |
| ZRT2        | 6.588192 | 1.5E-05  | 3635861  |
| C5_01410C_A | 6.56759  | 6.47E-06 | 3647054  |
| C1_11740W_A | 6.549349 | 0.002301 | 3645317  |
| FAT1        | 6.548952 | 1.06E-07 | 3647083  |
| C6_00930C_A | 6.522591 | 6.23E-05 | 3644032  |
| CAM1-1      | 6.490954 | 1.16E-07 | 3646358  |
| CLB4        | 6.488649 | 0.01117  | 3643102  |
| C1_08730W_A | 6.482059 | 0.002338 | 3634938  |
| PMT5        | 6.444262 | 0.0005   | 3639011  |
| C1_11280W_A | 6.441377 | 1.45E-05 | 3644554  |
| ARP2        | 6.416802 | 3.72E-08 | 3641915  |
| CR_03600C_A | 6.409498 | 2.21E-06 | 3643207  |
| YBL053      | 6.392742 | 0.000944 | 3647045  |
| END3        | 6.38121  | 4.32E-05 | 3636644  |
| C4_02040W_A | 6.374456 | 0.000276 | 3635649  |
| C1_04280C_A | 6.361466 | 0.003046 | 3644709  |
| HEM2        | 6.358928 | 5.8E-08  | 3637428  |
| C4_00380W_A | 6.329201 | 0.000658 | 3645015  |
| RCT1        | 6.309773 | 3.58E-07 | 3641727  |
| MDH1        | 6.276794 | 3.73E-08 | 3639667  |
| C2_05560W_A | 6.251865 | 0.003526 | 3645561  |
| C2_09910C_A | 6.250591 | 0.015798 | 30515162 |
| UAP1        | 6.247257 | 2.19E-08 | 3637769  |
| C5_01960C_A | 6.236381 | 6.63E-05 | 3643738  |
| C7_04120W_A | 6.227169 | 0.001565 | 3643132  |
| C7_03640C_A | 6.22652  | 0.014058 | 3646223  |
| CDC7        | 6.221631 | 0.000283 | 3643424  |
| C1_05670W_A | 6.202349 | 1.99E-06 | 3639899  |
| C1_12240C_A | 6.200708 | 0.000377 | 3642023  |
| EAP1        | 6.19157  | 6.21E-07 | 3643814  |



|             |          |          |          |
|-------------|----------|----------|----------|
| C7_00600C_A | 6.189329 | 0.001103 | 3638031  |
| C4_03400W_A | 6.18544  | 0.020816 | 30515256 |
| C6_01960W_A | 6.181032 | 0.006659 | 3644559  |
| C2_03450W_A | 6.178047 | 0.001339 | 3637349  |
| ARC19       | 6.17121  | 0.005128 | 3640418  |
| ABP1        | 6.171145 | 1.49E-08 | 3637875  |
| HTA1        | 6.144053 | 2.41E-05 | 3645658  |
| PHO89       | 6.141092 | 1.84E-07 | 3635633  |
| C2_01260W_A | 6.137039 | 0.014463 | 3638792  |
| HFL1        | 6.133442 | 0.016362 | 3636883  |
| SAS2        | 6.130831 | 0.014099 | 3638817  |
| SAM4        | 6.129074 | 1.3E-08  | 3646506  |
| CR_09670C_A | 6.127159 | 4.15E-05 | 3647091  |
| PLD1        | 6.097278 | 5.91E-09 | 3645329  |
| ERG12       | 6.086796 | 3.43E-05 | 3634859  |
| C3_06610W_A | 6.081559 | 7.24E-05 | 3642248  |
| LSP1        | 6.063994 | 1.62E-07 | 3648025  |
| GRS1        | 6.062999 | 4.4E-08  | 3642474  |
| BUD7        | 6.059015 | 1.17E-07 | 3647228  |
| RFX2        | 6.04692  | 0.002958 | 3635658  |
| C3_00210C_A | 6.041429 | 0.015039 | 3640560  |
| CPY1        | 6.01905  | 8.02E-08 | 3646721  |
| CTA2        | 6.012993 | 1.11E-05 | 3639372  |
| CR_04880W_A | 6.005429 | 0.001646 | 3647309  |
| MYO1        | 5.967666 | 2.26E-05 | 3647248  |
| C1_02910C_A | 5.948469 | 0.018746 | 3636829  |
| C1_07780W_A | 5.938438 | 1.54E-06 | 3647955  |
| C1_01250W_A | 5.935509 | 1.29E-05 | 3640212  |
| CAM1        | 5.924961 | 1.97E-08 | 3641734  |
| DQD1        | 5.915274 | 0.000122 | 3643488  |
| ADO1        | 5.911867 | 4.34E-07 | 3639274  |
| PGA33       | 5.908886 | 8.23E-05 | 3637350  |
| C1_08080C_A | 5.905358 | 7.33E-05 | 30515029 |
| HEM14       | 5.900407 | 0.000364 | 3634923  |
| KGD1        | 5.895119 | 5.2E-07  | 3647752  |
| C7_02670W_A | 5.886337 | 0.000244 | 3647651  |
| CTA7        | 5.87097  | 7.5E-07  | 3637776  |
| C4_06460C_A | 5.866254 | 0.016    | 3642791  |
| RPL43A      | 5.862761 | 4.58E-07 | 30515319 |
| C4_04090C_A | 5.857652 | 0.000135 | 3641225  |
| FGR51       | 5.857221 | 0.000165 | 3647796  |
| PIL1        | 5.84721  | 6.47E-07 | 3644769  |
| CHS8        | 5.826818 | 4.76E-06 | 3640532  |
| POT1        | 5.810206 | 5.41E-05 | 3639707  |
| C3_03510C_A | 5.797564 | 0.000149 | 3638310  |
| MNN10       | 5.783226 | 5.49E-05 | 3644997  |
| C4_01460C_A | 5.77187  | 0.016684 | 3635622  |

|             |          |          |          |
|-------------|----------|----------|----------|
| AYR1        | 5.770057 | 0.000802 | 3647754  |
| C2_06320W_A | 5.730532 | 8.03E-08 | 3646927  |
| SRO77       | 5.71523  | 3.28E-08 | 3646088  |
| C2_02870W_A | 5.70995  | 0.000108 | 3642972  |
| VMA13       | 5.704577 | 3.84E-07 | 30515402 |
| C2_02220C_A | 5.692921 | 0.047299 | 3635774  |
| C2_09250W_A | 5.683189 | 0.01704  | 3644065  |
| C1_03240W_A | 5.670858 | 0.006092 | 3636895  |
| AHP2        | 5.658486 | 0.000175 | 3636977  |
| CMK2        | 5.65581  | 3.21E-06 | 3643961  |
| CDG1        | 5.647131 | 1.92E-06 | 3641883  |
| CDC54       | 5.639042 | 0.006515 | 3647606  |
| ERG8        | 5.637382 | 6.44E-06 | 3635640  |
| CR_07110C_A | 5.628829 | 0.018933 | 3648224  |
| C3_04590W_A | 5.615918 | 2.15E-07 | 30515204 |
| C4_00910C_A | 5.606538 | 0.00663  | 3635679  |
| FMO2        | 5.602758 | 0.02435  | 3637440  |
| IDH2        | 5.591224 | 6.18E-08 | 3642979  |
| LAG1        | 5.590822 | 0.001433 | 3640383  |
| CR_06070W_A | 5.581562 | 8.39E-05 | 3644840  |
| PRO2        | 5.573196 | 4.21E-06 | 3638532  |
| FOX2        | 5.568507 | 0.000127 | 3648327  |
| C5_05350W_A | 5.558487 | 0.005569 | 3636401  |
| RFC3        | 5.552059 | 0.006981 | 3647440  |
| C1_10730W_A | 5.539204 | 2.95E-05 | 3644404  |
| CHT4        | 5.536635 | 0.00789  | 3635768  |
| C1_12070C_A | 5.5277   | 0.000878 | 3642025  |
| C4_02470C_A | 5.523827 | 1.77E-06 | 3637869  |
| FLC2        | 5.515942 | 1.61E-07 | 3647962  |
| CHC1        | 5.511545 | 7.76E-07 | 3647552  |
| C1_11120C_A | 5.504122 | 6.08E-07 | 3644412  |
| PIKA        | 5.502814 | 8.46E-07 | 3643765  |
| C3_00310C_A | 5.450714 | 4.8E-05  | 3640523  |
| MMS21       | 5.439869 | 0.024721 | 3642265  |
| SMC5        | 5.424758 | 0.002748 | 3645103  |
| RBD1        | 5.423033 | 2.69E-07 | 3642018  |
| C1_02330C_A | 5.420957 | 1.32E-05 | 30514969 |
| CR_01070W_A | 5.420097 | 0.023876 | 3640382  |
| C3_04420W_A | 5.409301 | 7.9E-06  | 3635180  |
| CR_08670C_A | 5.404523 | 0.007031 | 3642126  |
| ADE1        | 5.38496  | 1.38E-05 | 3639722  |
| CR_01280C_A | 5.367358 | 0.00271  | 3640400  |
| GYP1        | 5.361963 | 6.24E-07 | 3641138  |
| MNN26       | 5.359427 | 4.15E-05 | 3646240  |
| IRO1        | 5.345225 | 2.2E-07  | 3636648  |
| C7_01480W_A | 5.342689 | 0.000958 | 3636956  |
| C1_12060C_A | 5.337814 | 0.021485 | 3642026  |

|             |          |          |          |
|-------------|----------|----------|----------|
| CR_06270W_A | 5.333475 | 0.021785 | 3644854  |
| C4_06860C_A | 5.332392 | 0.021566 | 30515286 |
| C6_01750C_A | 5.332104 | 0.022134 | 3641640  |
| EFB1        | 5.329831 | 3.2E-07  | 3641125  |
| C4_00330C_A | 5.326494 | 5.92E-06 | 30515227 |
| CMD1        | 5.324582 | 2.36E-06 | 3646520  |
| SER1        | 5.319138 | 1.76E-05 | 3646909  |
| C2_01320W_A | 5.314683 | 0.000135 | 3638846  |
| RBT5        | 5.308137 | 8.84E-05 | 3645007  |
| CR_01320C_A | 5.284511 | 0.000846 | 3640386  |
| C4_04180C_A | 5.279597 | 0.002933 | 3641183  |
| C3_04460W_A | 5.276477 | 1.35E-05 | 3635208  |
| C2_03290W_A | 5.276405 | 0.000299 | 3637429  |
| C4_03860C_A | 5.246291 | 0.023553 | 3647854  |
| PDR17       | 5.246008 | 0.02402  | 3643007  |
| C4_03530W_A | 5.240982 | 0.025068 | 3645376  |
| C2_08160C_A | 5.240836 | 8.95E-07 | 30515152 |
| IFR2        | 5.231447 | 7.79E-07 | 3645100  |
| C2_01160W_A | 5.230462 | 0.00164  | 3638861  |
| BUB1        | 5.223309 | 0.000164 | 3637922  |
| TOP2        | 5.221698 | 0.000509 | 3642777  |
| CYK3        | 5.197671 | 0.011663 | 3639539  |
| CAT1        | 5.196823 | 5.57E-05 | 3639495  |
| C1_00920W_A | 5.185805 | 6.36E-05 | 3639283  |
| CR_01180W_A | 5.183388 | 0.000156 | 3640427  |
| IFK2        | 5.182736 | 0.00108  | 3637439  |
| CR_06520C_A | 5.152356 | 0.00108  | 3645263  |
| C6_03470W_A | 5.144351 | 6.37E-06 | 3640253  |
| CDC13       | 5.143262 | 0.000301 | 3639293  |
| C6_04560W_A | 5.139907 | 2.76E-06 | 3645977  |
| GAL4        | 5.137987 | 1.07E-06 | 3641244  |
| PRN4        | 5.132655 | 0.003262 | 3639877  |
| C2_07980W_A | 5.120097 | 0.001965 | 3642312  |
| TIP1        | 5.113228 | 0.001818 | 3636512  |
| OCH1        | 5.106377 | 1.42E-06 | 3641751  |
| SEC4        | 5.106139 | 7.85E-07 | 3640119  |
| C2_09560C_A | 5.104174 | 6.06E-05 | 3643813  |
| CHS7        | 5.102603 | 7.3E-06  | 3639869  |
| DUT1        | 5.07202  | 0.028242 | 3640188  |
| C5_03950W_A | 5.07037  | 0.001637 | 3647445  |
| C2_09810C_A | 5.068799 | 0.000177 | 3643802  |
| ARF2        | 5.067558 | 2.47E-07 | 3635271  |
| ANB1        | 5.063088 | 4.46E-07 | 3641648  |
| CR_05450C_A | 5.063032 | 0.001182 | 3648236  |
| SMF3        | 5.059933 | 0.000104 | 3638852  |
| GSP1        | 5.05313  | 6.4E-07  | 3646925  |
| SMC2        | 5.053002 | 0.003966 | 3643918  |

|             |          |          |         |
|-------------|----------|----------|---------|
| RPS12       | 5.051544 | 7.31E-06 | 3638438 |
| RNH1        | 5.047888 | 0.000163 | 3639237 |
| CCC1        | 5.044599 | 0.003893 | 3645645 |
| MNN9        | 5.042605 | 2.11E-06 | 3641735 |
| C4_00190W_A | 5.039678 | 0.032224 | 3645030 |
| C3_07770C_A | 5.033574 | 7.47E-05 | 3647457 |
| C7_02100W_A | 5.028475 | 5.57E-07 | 3637023 |
| APG7        | 5.028206 | 0.002167 | 3646615 |
| C2_02090W_A | 5.0212   | 0.001124 | 3635854 |
| CR_03530W_A | 5.018348 | 6.68E-07 | 3643204 |
| GPX2        | 5.017698 | 3.64E-07 | 3644009 |
| MDL1        | 5.014136 | 1.72E-06 | 3640146 |
| C1_07510W_A | 5.010103 | 0.030482 | 3646664 |
| ACS1        | 5.008528 | 9.45E-05 | 3643941 |
| PMT6        | 5.002545 | 2.81E-06 | 3641116 |
| ERG9        | 4.999515 | 6.9E-06  | 3643913 |
| C5_03140C_A | 4.998905 | 9.07E-07 | 3637798 |
| C1_02430C_A | 4.995544 | 2.66E-06 | 3636846 |
| C1_06200W_A | 4.995318 | 0.000111 | 3648300 |
| CR_02620C_A | 4.994553 | 0.000178 | 3642567 |
| CR_05680C_A | 4.990849 | 0.003798 | 3646684 |
| CTP1        | 4.986583 | 0.014916 | 3635141 |
| C3_03080W_A | 4.982532 | 0.001985 | 3638397 |
| C7_00120W_A | 4.979193 | 0.000456 | 3637976 |
| C4_04160W_A | 4.964606 | 9.48E-06 | 3641185 |
| C7_03160W_A | 4.956961 | 6.66E-07 | 3641345 |
| C6_03050C_A | 4.952022 | 0.037097 | 3639270 |
| CHT2        | 4.939901 | 3.37E-05 | 3636523 |
| C4_00410W_A | 4.925038 | 0.000342 | 3645019 |
| PLC1        | 4.891512 | 0.000475 | 3647860 |
| CR_09520C_A | 4.891087 | 0.031024 | 3647103 |
| C6_00270W_A | 4.872954 | 0.000412 | 3646066 |
| C5_04420W_A | 4.867012 | 0.002032 | 3636411 |
| TIP20       | 4.866093 | 8.31E-06 | 3636457 |
| LAP3        | 4.863248 | 8.25E-05 | 3641012 |
| TEF1        | 4.862724 | 2.55E-06 | 3648254 |
| C4_05340W_A | 4.839855 | 0.000218 | 3646947 |
| HYU1        | 4.839775 | 6.19E-05 | 3643024 |
| C1_08800W_A | 4.837081 | 0.000581 | 3634791 |
| MAE1        | 4.833762 | 9.82E-07 | 3641615 |
| SPE1        | 4.812509 | 1.3E-06  | 3639327 |
| C3_06410C_A | 4.804233 | 0.01558  | 3642261 |
| C1_00820W_A | 4.803044 | 0.033147 | 3639345 |
| C4_03770W_A | 4.797895 | 0.03318  | 3645354 |
| C6_03580W_A | 4.795897 | 0.006037 | 3640250 |
| C5_01440C_A | 4.793985 | 0.006445 | 3647043 |
| VMA4        | 4.781401 | 2.27E-06 | 3640111 |

|             |          |          |          |
|-------------|----------|----------|----------|
| C1_05900W_A | 4.765009 | 3.49E-07 | 3639866  |
| UGP1        | 4.759202 | 9.71E-06 | 3648144  |
| C1_02890C_A | 4.758756 | 0.040296 | 3636867  |
| ADE6        | 4.758255 | 3.3E-05  | 3647304  |
| FAS1        | 4.757399 | 1.36E-05 | 3641593  |
| MET13       | 4.749108 | 0.000243 | 3638382  |
| C1_01010W_A | 4.747363 | 0.000213 | 3640181  |
| ILV2        | 4.747117 | 5.83E-07 | 3636552  |
| SRV2        | 4.738655 | 1.46E-06 | 3640938  |
| C6_01370W_A | 4.73421  | 0.00023  | 3641607  |
| ORC3        | 4.723849 | 0.000244 | 3645639  |
| CR_02210W_A | 4.713933 | 5.95E-06 | 3644943  |
| C7_00140C_A | 4.685289 | 0.000136 | 3637974  |
| C1_07440W_A | 4.681546 | 2.95E-06 | 3644482  |
| COX4        | 4.654408 | 1.54E-06 | 3635737  |
| RHO2        | 4.650796 | 0.008031 | 30515143 |
| C3_06690C_A | 4.641896 | 0.003623 | 3642256  |
| C7_03780C_A | 4.620232 | 0.040584 | 3643119  |
| KIP3        | 4.607211 | 0.008749 | 3641716  |
| C2_05170W_A | 4.604194 | 0.00229  | 3643462  |
| C4_05380C_A | 4.599028 | 0.019559 | 30515276 |
| PAN3        | 4.563835 | 0.000138 | 3636464  |
| SAH1        | 4.563812 | 1.41E-05 | 3636452  |
| C6_02530C_A | 4.555931 | 0.020054 | 3639175  |
| CR_05900W_A | 4.55461  | 0.00854  | 3646681  |
| APN1        | 4.553958 | 0.00071  | 3642263  |
| C2_09620W_A | 4.54856  | 0.000358 | 3643797  |
| C7_00520W_A | 4.54809  | 1.31E-06 | 3638001  |
| NDE1        | 4.547453 | 7.58E-07 | 3638354  |
| C1_14170W_A | 4.546765 | 2.43E-06 | 3643323  |
| C2_08650W_A | 4.545553 | 2.74E-05 | 3643908  |
| REV3        | 4.536442 | 0.000841 | 3641749  |
| MNN2        | 4.529074 | 0.000425 | 3644405  |
| C6_02470W_A | 4.521126 | 0.000154 | 3639169  |
| RPS1        | 4.516565 | 2.5E-05  | 3636924  |
| C1_04930C_A | 4.511236 | 0.004777 | 3644792  |
| ATP20       | 4.507289 | 0.000327 | 3647602  |
| C6_02330W_A | 4.502678 | 7.44E-07 | 3645877  |
| PMS1        | 4.500903 | 0.02329  | 3647714  |
| ERG4        | 4.500671 | 2.18E-06 | 3640511  |
| C7_03050W_A | 4.495374 | 0.001789 | 3641378  |
| C1_14240W_A | 4.484747 | 0.000107 | 3643306  |
| SSO2        | 4.478966 | 2.81E-06 | 3643809  |
| YPT72       | 4.473119 | 0.000666 | 3643523  |
| C1_10630C_A | 4.472668 | 0.009594 | 3647683  |
| BNi4        | 4.469513 | 6.62E-05 | 3646406  |
| C1_12740W_A | 4.4691   | 4.23E-05 | 3646819  |

|             |          |          |          |
|-------------|----------|----------|----------|
| USO1        | 4.468454 | 1.77E-06 | 3648280  |
| EIF4E       | 4.446408 | 2E-05    | 3638981  |
| RPP1B       | 4.443729 | 7.56E-05 | 3643104  |
| CR_09070C_A | 4.440979 | 0.000243 | 3641926  |
| CR_02570C_A | 4.438214 | 0.006647 | 3647685  |
| RPL19A      | 4.434934 | 2.9E-05  | 3635257  |
| C3_05280C_A | 4.426884 | 0.011227 | 3635202  |
| C1_01950C_A | 4.423125 | 0.021815 | 3645421  |
| CBP1        | 4.419083 | 6.46E-05 | 3641920  |
| C6_00200C_A | 4.416972 | 0.000164 | 3646082  |
| CYP5        | 4.413257 | 3.21E-06 | 3642257  |
| C1_02510W_A | 4.406937 | 0.003141 | 3636796  |
| ADH2        | 4.402566 | 7.19E-07 | 3640751  |
| C6_00110C_A | 4.402356 | 0.004484 | 3647896  |
| ARO2        | 4.391233 | 8.01E-06 | 3648190  |
| HOG1        | 4.389342 | 7.96E-06 | 3637393  |
| APS3        | 4.371817 | 0.004787 | 3646491  |
| DNM1        | 4.365143 | 5.27E-05 | 3643673  |
| RPS7A       | 4.360379 | 1E-05    | 3636573  |
| MDH1-3      | 4.359076 | 9.09E-05 | 3641197  |
| CR_08440W_A | 4.359072 | 0.024287 | 3642132  |
| C4_04330C_A | 4.357524 | 8.61E-06 | 3646840  |
| ZCF26       | 4.354832 | 0.048205 | 3635666  |
| PEX6        | 4.345437 | 0.000279 | 3643436  |
| MMD1        | 4.344995 | 5.84E-06 | 30515015 |
| CR_08350W_A | 4.334134 | 1.57E-05 | 3642082  |
| MNN21       | 4.325369 | 8.59E-05 | 3648124  |
| C3_01180C_A | 4.323613 | 2.01E-05 | 3647960  |
| C1_02780W_A | 4.320088 | 0.000419 | 3636871  |
| CDC73       | 4.319965 | 0.000239 | 3636830  |
| NHX1        | 4.317297 | 4.56E-06 | 3647141  |
| SHM1        | 4.304162 | 1.56E-05 | 3646724  |
| YKT6        | 4.302491 | 9.41E-06 | 3636863  |
| C2_07270W_A | 4.294738 | 0.002459 | 3643474  |
| TLO9        | 4.294055 | 0.000789 | 3648051  |
| C7_04310C_A | 4.291712 | 7.64E-05 | 3643141  |
| C1_10090C_A | 4.291117 | 1.2E-05  | 3634817  |
| TLO1        | 4.289848 | 0.001446 | 3639677  |
| C3_07450C_A | 4.286121 | 0.016185 | 3638481  |
| MSC7        | 4.282537 | 0.000299 | 3645214  |
| PTC7        | 4.276904 | 4.59E-06 | 3645000  |
| C3_04130W_A | 4.275276 | 3.35E-05 | 3635283  |
| TRP99       | 4.272305 | 0.000326 | 3642494  |
| ATP16       | 4.269726 | 6E-06    | 3638963  |
| LYS21       | 4.263147 | 4.28E-06 | 3644763  |
| UBC15       | 4.248402 | 0.000874 | 3641260  |
| C3_07630C_A | 4.246181 | 1.34E-05 | 3638491  |

|             |          |          |          |
|-------------|----------|----------|----------|
| ENT3        | 4.246172 | 2.51E-06 | 3635813  |
| YHM1        | 4.235623 | 0.000286 | 3644535  |
| CR_08980C_A | 4.227858 | 0.000491 | 3641890  |
| IML2        | 4.227143 | 3.33E-06 | 3643302  |
| GWT1        | 4.226826 | 0.002129 | 3645575  |
| RPS8A       | 4.22088  | 6.09E-06 | 3645565  |
| MSI3        | 4.214665 | 1.7E-05  | 3639821  |
| PNP1        | 4.210877 | 7.43E-05 | 3638426  |
| SCL1        | 4.208555 | 1.69E-05 | 3640510  |
| PPH21       | 4.205571 | 1.91E-05 | 3636665  |
| C3_02190C_A | 4.204058 | 0.000412 | 3636642  |
| PXA1        | 4.200036 | 1.56E-05 | 3639713  |
| RPB11       | 4.181735 | 0.022952 | 30514957 |
| C1_13280C_A | 4.177465 | 0.001529 | 3636145  |
| VPS51       | 4.17663  | 0.027806 | 3639242  |
| ZCF32       | 4.175263 | 0.006824 | 3635213  |
| NIT3        | 4.172969 | 0.000911 | 3644408  |
| C3_01140W_A | 4.166966 | 0.004326 | 3639902  |
| TRP3        | 4.155172 | 0.001317 | 3642035  |
| C1_02680C_A | 4.151313 | 0.002566 | 3636822  |
| CCT5        | 4.14806  | 6.91E-06 | 3643478  |
| CPR3        | 4.139963 | 0.000244 | 3635812  |
| KEL1        | 4.139093 | 4.8E-06  | 3639318  |
| RPN7        | 4.139033 | 1.28E-06 | 3641909  |
| C2_01170C_A | 4.137076 | 1.42E-05 | 3638860  |
| C2_06950C_A | 4.118096 | 0.028705 | 3643527  |
| VCX1        | 4.100945 | 0.003644 | 3646508  |
| UBA1        | 4.100064 | 2.07E-06 | 3642286  |
| CR_09590W_A | 4.096411 | 0.00423  | 3647095  |
| CR_09570W_A | 4.092861 | 0.03733  | 3647098  |
| CHT3        | 4.087898 | 0.024286 | 3638967  |
| RPL20B      | 4.086463 | 2.46E-05 | 3635615  |
| C1_00330C_A | 4.078621 | 0.004594 | 3639296  |
| HTA3        | 4.077191 | 0.018898 | 3638322  |
| CHS5        | 4.076529 | 5.62E-06 | 3637333  |
| C3_01210C_A | 4.072588 | 8.79E-05 | 3636612  |
| RFC4        | 4.057295 | 0.013769 | 3638994  |
| ARO9        | 4.055468 | 0.007539 | 3641773  |
| ARC15       | 4.05516  | 0.001319 | 3646043  |
| HFL2        | 4.050918 | 0.006183 | 3637833  |
| ERG251      | 4.021857 | 1.92E-05 | 3635716  |
| RPS26A      | 4.020876 | 0.000123 | 3635787  |
| C6_03990C_A | 4.012999 | 0.008697 | 3640271  |
| RPP1A       | 4.007548 | 0.000123 | 3636839  |
| C1_08780W_A | 4.00676  | 9.4E-05  | 3634789  |
| C1_09430W_A | 4.005924 | 3.44E-05 | 3634855  |
| C1_04460C_A | 4.005611 | 0.024041 | 3646140  |

|             |          |          |          |
|-------------|----------|----------|----------|
| YSA1        | 4.004955 | 0.004925 | 3638516  |
| YHM2        | 4.004864 | 0.000109 | 3647137  |
| HAC1        | 3.999477 | 4.61E-05 | 3639849  |
| PGA38       | 3.995974 | 0.040161 | 3637846  |
| MCA1        | 3.99438  | 9.8E-06  | 3635233  |
| CR_07570W_A | 3.97479  | 0.002638 | 3648004  |
| COX6        | 3.968101 | 1.02E-05 | 30515099 |
| TOM40       | 3.964615 | 1.06E-05 | 3636968  |
| ERG27       | 3.959248 | 0.000698 | 3640432  |
| GLO2        | 3.958029 | 0.006693 | 3644067  |
| C6_02580W_A | 3.949989 | 0.000279 | 3639207  |
| C3_07740W_A | 3.946588 | 5.37E-06 | 3638453  |
| C3_01310W_A | 3.939431 | 0.010136 | 3636620  |
| CR_07170W_A | 3.934186 | 0.000781 | 3645271  |
| MKK2        | 3.932895 | 1.99E-05 | 3645580  |
| MED1        | 3.932297 | 0.001252 | 3637418  |
| C2_03910C_A | 3.929919 | 0.001437 | 3637426  |
| CSP1        | 3.918971 | 0.005894 | 3648242  |
| C3_01420C_A | 3.917771 | 0.010675 | 3636634  |
| C2_10470C_A | 3.917255 | 0.001168 | 3641196  |
| CR_08900C_A | 3.916721 | 0.00054  | 3641908  |
| C3_03840C_A | 3.91211  | 0.001382 | 3645628  |
| C3_04810C_A | 3.909933 | 4.79E-06 | 30515205 |
| C2_07720C_A | 3.909067 | 0.000991 | 3642304  |
| DDI1        | 3.879424 | 2.07E-05 | 3643295  |
| C2_01690W_A | 3.873824 | 0.000137 | 3635728  |
| RPL18       | 3.869799 | 6.61E-05 | 3635156  |
| EMP70       | 3.852388 | 9.9E-06  | 3637919  |
| C1_00830W_A | 3.849186 | 0.028817 | 3639344  |
| CDC68       | 3.849058 | 6.18E-06 | 3642787  |
| ILV6        | 3.847807 | 0.000903 | 3635598  |
| C3_00910W_A | 3.847204 | 0.041876 | 3647755  |
| CR_10020C_A | 3.837983 | 0.005294 | 3639032  |
| CCT2        | 3.837818 | 1.05E-05 | 3643815  |
| C3_00170C_A | 3.830113 | 0.000805 | 3640589  |
| LIP8        | 3.829812 | 0.005473 | 3646727  |
| SYS1        | 3.828367 | 0.002338 | 3643138  |
| C4_06940C_A | 3.824544 | 0.013519 | 3642928  |
| EXO1        | 3.824469 | 0.047552 | 3641583  |
| KAR9        | 3.820378 | 0.012541 | 3636136  |
| ZCF7        | 3.816531 | 0.036992 | 3636667  |
| SUC1        | 3.812734 | 0.002637 | 3641916  |
| C7_04280C_A | 3.806238 | 0.000315 | 3643173  |
| GDB1        | 3.797586 | 2.02E-05 | 3647409  |
| TOM22       | 3.790525 | 0.005079 | 3647650  |
| SEC3        | 3.789551 | 0.000181 | 3642806  |
| CR_07370W_A | 3.779737 | 0.003348 | 3646053  |



|             |          |          |          |
|-------------|----------|----------|----------|
| RAD7        | 3.776123 | 0.003301 | 3635833  |
| LEU4        | 3.772035 | 0.038523 | 3639339  |
| UBC4        | 3.767128 | 3.26E-05 | 3638927  |
| CR_05140W_A | 3.762688 | 0.009213 | 3646400  |
| TOM70       | 3.759882 | 5.35E-05 | 3647645  |
| FRP3        | 3.756627 | 0.000816 | 3648102  |
| C2_05220C_A | 3.75624  | 0.000109 | 3643466  |
| RPL28       | 3.747916 | 1.22E-05 | 30515386 |
| C2_06920C_A | 3.746453 | 0.014044 | 3643524  |
| C7_03260C_A | 3.745562 | 0.014463 | 3641366  |
| C2_00180C_A | 3.743811 | 0.015926 | 3638905  |
| C1_04190C_A | 3.718987 | 0.00805  | 3644717  |
| RPL10A      | 3.718767 | 9.94E-05 | 3645868  |
| C1_01050C_A | 3.71751  | 0.001525 | 3640170  |
| VPS52       | 3.717021 | 0.001204 | 3638996  |
| CR_02260C_A | 3.707917 | 0.03236  | 3644912  |
| PCK1        | 3.705119 | 0.000265 | 3639701  |
| DOT1        | 3.704418 | 0.003536 | 3642236  |
| GAT1        | 3.702616 | 0.005218 | 3641794  |
| CSH1        | 3.702384 | 0.000525 | 3646427  |
| GPI7        | 3.701056 | 0.01265  | 3647672  |
| RPN2        | 3.699942 | 9.27E-06 | 3642027  |
| C1_07340W_A | 3.691404 | 0.000475 | 3644472  |
| CR_00380W_A | 3.676387 | 0.031047 | 3639682  |
| C5_01980C_A | 3.67327  | 0.001585 | 3643775  |
| C4_01020C_A | 3.666797 | 5.4E-05  | 3635606  |
| ABP2        | 3.653198 | 0.046791 | 3643443  |
| C5_03490C_A | 3.652206 | 6.86E-05 | 3646967  |
| C1_13190W_A | 3.650994 | 5.6E-05  | 3636163  |
| C7_00230W_A | 3.648588 | 0.027589 | 3637982  |
| C4_01730C_A | 3.644255 | 0.001161 | 3635588  |
| PEX3        | 3.639587 | 0.00322  | 3644484  |
| C6_02560W_A | 3.638922 | 0.012735 | 3639205  |
| C4_03130W_A | 3.627604 | 2.26E-05 | 3637921  |
| C3_05010C_A | 3.624619 | 0.005536 | 3635169  |
| C1_07820W_A | 3.615764 | 0.0429   | 3640735  |
| CR_09010C_A | 3.610807 | 0.000309 | 3641892  |
| CR_05880W_A | 3.600767 | 0.028246 | 3646702  |
| CDC48       | 3.598504 | 0.000358 | 3644440  |
| CNB1        | 3.59516  | 0.006195 | 3636463  |
| FAA2-1      | 3.590622 | 0.001892 | 3644100  |
| HOC1        | 3.589869 | 0.002034 | 3641605  |
| CR_02410W_A | 3.581474 | 0.005914 | 3644928  |
| MIR1        | 3.577297 | 0.000225 | 3634782  |
| HGT7        | 3.571017 | 0.00039  | 3638876  |
| RTA2        | 3.57001  | 7.24E-05 | 3646567  |
| ZCF39       | 3.56962  | 5.46E-05 | 3639037  |

|             |          |          |          |
|-------------|----------|----------|----------|
| CYC1        | 3.56024  | 0.000789 | 3643937  |
| COQ3        | 3.551798 | 0.006053 | 3641630  |
| C1_11100W_A | 3.55021  | 0.009537 | 3644414  |
| MEA1        | 3.54812  | 0.033535 | 3635154  |
| DAO1        | 3.545193 | 0.001306 | 3636885  |
| ZCF5        | 3.543083 | 0.040147 | 3641819  |
| C5_02400W_A | 3.541218 | 0.000294 | 3637724  |
| SYS3        | 3.537813 | 2.19E-05 | 3645119  |
| YPT1        | 3.53434  | 8.95E-05 | 3636915  |
| C2_01900C_A | 3.530223 | 0.000183 | 3635789  |
| POL3        | 3.52156  | 0.001745 | 3641359  |
| C1_03440C_A | 3.521544 | 0.000803 | 3636908  |
| VPS35       | 3.520519 | 4.95E-05 | 3645567  |
| C6_01050W_A | 3.51517  | 0.00528  | 3644015  |
| C1_12700W_A | 3.514355 | 0.009678 | 3646831  |
| RPS16A      | 3.511864 | 4.99E-05 | 30514974 |
| C4_06020C_A | 3.511864 | 0.000195 | 3646519  |
| GTT11       | 3.503801 | 0.003401 | 3645644  |
| C1_13030C_A | 3.492924 | 1.62E-05 | 3636122  |
| C7_01930C_A | 3.491217 | 0.008134 | 3637027  |
| NAM2        | 3.4893   | 0.010202 | 3640275  |
| C4_07240W_A | 3.487261 | 0.002158 | 3642945  |
| C1_07840W_A | 3.486648 | 0.000717 | 3640737  |
| RPL17B      | 3.484666 | 0.00033  | 3645439  |
| CR_07080W_A | 3.472962 | 0.000173 | 3647964  |
| C5_00340W_A | 3.467975 | 0.012369 | 3641555  |
| C1_09750W_A | 3.466902 | 0.002219 | 3634822  |
| C5_01550C_A | 3.466429 | 0.000161 | 3647063  |
| PKH3        | 3.458827 | 0.000425 | 3646075  |
| MCI4        | 3.454564 | 0.002442 | 3640118  |
| C1_14060W_A | 3.448728 | 0.000572 | 3643344  |
| VPS8        | 3.444698 | 0.011367 | 3640534  |
| C1_04620W_A | 3.442335 | 6.2E-05  | 3646135  |
| C1_00320W_A | 3.441664 | 0.009167 | 3639297  |
| LRG1        | 3.438669 | 8.28E-05 | 3639727  |
| RSR1        | 3.437553 | 0.000192 | 3640145  |
| BTS1        | 3.43434  | 0.020717 | 3646982  |
| CR_03460W_A | 3.430462 | 0.00251  | 3643213  |
| COQ5        | 3.42716  | 0.001145 | 3643416  |
| ECI1        | 3.426011 | 0.001677 | 3642128  |
| SEC10       | 3.419897 | 0.000313 | 3642961  |
| SES1        | 3.419709 | 0.000112 | 3638415  |
| ALG9        | 3.413484 | 0.001777 | 3644457  |
| C1_04090C_A | 3.411574 | 0.039734 | 3644697  |
| URA6        | 3.403657 | 4.3E-05  | 3647988  |
| PRE2        | 3.398572 | 5.87E-05 | 3643490  |
| LRO1        | 3.398005 | 0.000973 | 3639356  |

|             |          |          |          |
|-------------|----------|----------|----------|
| ALA1        | 3.389175 | 8.58E-05 | 3640285  |
| C5_01350W_A | 3.38494  | 0.000907 | 3642640  |
| C1_10460W_A | 3.3726   | 0.00176  | 3647183  |
| ANP1        | 3.368125 | 0.002939 | 3643917  |
| C3_03760W_A | 3.368012 | 0.001525 | 3645638  |
| RNA1        | 3.357223 | 0.00041  | 3636595  |
| GLR1        | 3.342682 | 6.3E-05  | 3647061  |
| C6_04250W_A | 3.336202 | 0.000106 | 30515345 |
| PGA59       | 3.332264 | 0.000811 | 3637881  |
| ECM39       | 3.330477 | 0.013278 | 3641386  |
| RIB5        | 3.32941  | 0.001129 | 3636499  |
| EXO84       | 3.320346 | 6.02E-05 | 3644022  |
| ERV1        | 3.310173 | 0.042756 | 30515385 |
| C4_00590C_A | 3.308915 | 0.000176 | 3645772  |
| C3_01950C_A | 3.30878  | 0.000572 | 3636599  |
| MUQ1        | 3.307829 | 0.000932 | 3638898  |
| C4_00780C_A | 3.307399 | 0.000114 | 3645759  |
| C5_04900C_A | 3.301183 | 0.003201 | 3636416  |
| VPS33       | 3.300772 | 0.0014   | 3647477  |
| MCM3        | 3.297824 | 0.002531 | 3645223  |
| PHO88       | 3.291517 | 0.001456 | 3641898  |
| C2_04490W_A | 3.284771 | 0.000852 | 3645463  |
| OBPA        | 3.269104 | 0.000262 | 3643764  |
| PTC6        | 3.268295 | 0.008032 | 3647351  |
| CR_04330W_A | 3.264814 | 0.013796 | 3640997  |
| BET2        | 3.245244 | 0.008246 | 3639025  |
| RPS30       | 3.241223 | 0.000776 | 30515390 |
| C1_04580C_A | 3.239455 | 0.014415 | 3646132  |
| C7_00210C_A | 3.239076 | 0.001527 | 3637983  |
| C1_05920W_A | 3.23826  | 0.033224 | 3639864  |
| C2_03530W_A | 3.237403 | 0.000225 | 3637341  |
| YPD1        | 3.234746 | 0.001532 | 3644458  |
| C1_05390C_A | 3.228363 | 0.001453 | 3642479  |
| C5_02310C_A | 3.227603 | 0.002335 | 3637787  |
| C6_02030C_A | 3.226426 | 0.007092 | 3647562  |
| RPN8        | 3.22526  | 0.000136 | 3643770  |
| SFH5        | 3.224225 | 0.016194 | 3634884  |
| C5_04770W_A | 3.219041 | 0.021948 | 3636444  |
| PPE1        | 3.215594 | 0.049045 | 3635802  |
| CR_06260W_A | 3.21392  | 0.00331  | 3644853  |
| SEC1        | 3.212323 | 0.000253 | 3636935  |
| C2_01390W_A | 3.212183 | 0.000211 | 3635726  |
| C5_02500C_A | 3.204558 | 0.000656 | 3637766  |
| CFL5        | 3.203075 | 0.038153 | 3642612  |
| PHB2        | 3.196235 | 0.000843 | 3635238  |
| LCB2        | 3.193209 | 0.001209 | 3636181  |
| C2_01930C_A | 3.190275 | 0.003656 | 3635793  |

|             |          |          |          |
|-------------|----------|----------|----------|
| C7_02470C_A | 3.190074 | 0.010622 | 3636945  |
| C3_01900C_A | 3.189436 | 0.031564 | 3636559  |
| C5_01890W_A | 3.188043 | 0.003721 | 3643750  |
| C3_00790W_A | 3.187887 | 0.024141 | 3648186  |
| SHM2        | 3.180966 | 0.000501 | 3640306  |
| AAT21       | 3.171396 | 0.000168 | 3647241  |
| APR1        | 3.169739 | 0.000219 | 3645204  |
| C7_03480W_A | 3.168961 | 0.000155 | 3646230  |
| CR_01050C_A | 3.164468 | 0.001808 | 3640384  |
| RPL35       | 3.163878 | 0.00252  | 30515207 |
| CR_01300W_A | 3.159535 | 0.014145 | 30515373 |
| RPP0        | 3.157231 | 0.001283 | 3638023  |
| NUO2        | 3.15524  | 0.000167 | 3638381  |
| C1_08050W_A | 3.153911 | 0.000822 | 3640709  |
| CR_07230W_A | 3.153193 | 0.012535 | 3646031  |
| C7_00420C_A | 3.152968 | 0.010372 | 3638032  |
| CR_08050C_A | 3.151544 | 0.001799 | 3644133  |
| C1_11890W_A | 3.149874 | 0.003068 | 3642006  |
| C7_03200C_A | 3.147333 | 0.015023 | 3641342  |
| ILV1        | 3.145649 | 0.002879 | 3646918  |
| C3_00050C_A | 3.141758 | 0.019385 | 3640570  |
| C4_05850C_A | 3.139253 | 0.029473 | 3641791  |
| PGA52       | 3.138234 | 0.000108 | 3647908  |
| CAS4        | 3.136364 | 0.000479 | 3636568  |
| RAD51       | 3.1344   | 0.005833 | 3644944  |
| SSB1        | 3.130387 | 0.001167 | 3642095  |
| C3_06970W_A | 3.126409 | 0.00543  | 3638506  |
| PHO85       | 3.126243 | 0.000679 | 3646148  |
| ERG24       | 3.119446 | 0.038918 | 3647716  |
| FEN12       | 3.118283 | 0.001712 | 3637404  |
| RPS14B      | 3.115388 | 0.00056  | 30515006 |
| ALS2        | 3.108051 | 0.000883 | 3645724  |
| C2_07100W_A | 3.097429 | 0.001161 | 3643504  |
| C3_03340C_A | 3.097071 | 0.012581 | 30515195 |
| EFT2        | 3.090014 | 0.001543 | 3642998  |
| FBA1        | 3.086315 | 0.001796 | 3635585  |
| C1_14500C_A | 3.081537 | 0.000547 | 3643331  |
| C1_07100C_A | 3.081267 | 0.04458  | 3639487  |
| C1_01000C_A | 3.080769 | 0.046675 | 3640180  |
| CR_10600C_A | 3.070685 | 0.000162 | 3639004  |
| C1_06670W_A | 3.070225 | 0.002542 | 3639541  |
| HXT5        | 3.060491 | 0.033838 | 3643209  |
| RAD16       | 3.057254 | 0.00021  | 3636874  |
| CR_00090C_A | 3.053579 | 0.000406 | 3639734  |
| C1_02320C_A | 3.052493 | 0.000237 | 3644572  |
| C1_14030W_A | 3.0486   | 0.002144 | 3643340  |
| C1_07630W_A | 3.046552 | 0.011966 | 3646660  |

|             |          |          |          |
|-------------|----------|----------|----------|
| C2_05590C_A | 3.045937 | 0.007807 | 3645564  |
| BIG1        | 3.043247 | 0.005373 | 3644434  |
| HAT2        | 3.040821 | 0.001555 | 3645973  |
| C6_00340C_A | 3.03275  | 0.003284 | 3646074  |
| C7_02560W_A | 3.027451 | 0.002407 | 3637016  |
| C2_10720C_A | 3.0249   | 0.001026 | 3641209  |
| CR_09510C_A | 3.013919 | 0.002382 | 3647105  |
| ERG5        | 3.012704 | 0.000155 | 3641400  |
| PST1        | 3.004113 | 0.004671 | 3643520  |
| C5_02750C_A | 3.001568 | 0.002882 | 3637740  |
| C2_10670W_A | 2.998515 | 0.000318 | 3641251  |
| CFL2        | 2.998077 | 0.040201 | 3641811  |
| RPN1        | 2.993909 | 0.000542 | 3636147  |
| CR_10590W_A | 2.993536 | 0.003318 | 3639003  |
| FRS1        | 2.990909 | 0.000688 | 3640121  |
| ECM15       | 2.985888 | 0.011058 | 30515218 |
| C5_04470C_A | 2.985562 | 0.00048  | 3636414  |
| C1_13490C_A | 2.982605 | 0.020008 | 3636230  |
| C7_03370C_A | 2.979713 | 0.000207 | 3646720  |
| C6_00080C_A | 2.9792   | 0.018092 | 3647899  |
| C1_09070W_A | 2.978826 | 0.00211  | 3634773  |
| POB3        | 2.978031 | 0.000445 | 3635827  |
| C1_02160W_A | 2.977932 | 0.02033  | 3644584  |
| C4_03320W_A | 2.976292 | 0.009262 | 3648092  |
| GCN4        | 2.975472 | 0.000387 | 3643823  |
| STP1        | 2.973826 | 0.023283 | 3635152  |
| BEM3        | 2.972139 | 0.000211 | 3637885  |
| C3_06680C_A | 2.969209 | 0.047967 | 3642255  |
| C7_00250C_A | 2.968337 | 0.002763 | 3637979  |
| CR_10290C_A | 2.966737 | 0.000357 | 3638935  |
| C6_03330C_A | 2.965182 | 0.026171 | 3639199  |
| C5_04710W_A | 2.959707 | 0.031406 | 3636517  |
| ERG7        | 2.958764 | 0.000279 | 3635761  |
| CR_08000C_A | 2.954169 | 0.000265 | 3644150  |
| RIB4        | 2.951151 | 0.001181 | 30514995 |
| TFC4        | 2.950086 | 0.011524 | 3638420  |
| FUM11       | 2.948993 | 0.00245  | 3641016  |
| C2_07610C_A | 2.946371 | 0.000218 | 3645195  |
| RIM1        | 2.942539 | 0.011662 | 3639898  |
| PDS5        | 2.939677 | 0.010579 | 3642341  |
| C1_08110W_A | 2.936458 | 0.000492 | 3640716  |
| C5_05440C_A | 2.92545  | 0.000845 | 3636431  |
| RFC1        | 2.923625 | 0.001715 | 3645582  |
| C3_03210W_A | 2.923005 | 0.035717 | 3638315  |
| CHS6        | 2.914105 | 0.021667 | 3641377  |
| C6_03820C_A | 2.910948 | 0.006815 | 3640288  |
| LPD1        | 2.910244 | 0.001082 | 3646037  |

|             |          |          |          |
|-------------|----------|----------|----------|
| C5_00040C_A | 2.90745  | 0.000642 | 3647874  |
| KRS1        | 2.902415 | 0.000844 | 3638486  |
| SWC4        | 2.901764 | 0.005537 | 3639679  |
| C2_04170C_A | 2.895563 | 0.000444 | 30515111 |
| CR_00470W_A | 2.885032 | 0.000485 | 3639725  |
| C1_08680C_A | 2.883559 | 0.007721 | 3634933  |
| CTA24       | 2.878725 | 0.002748 | 3636475  |
| C7_00410C_A | 2.871329 | 0.030295 | 3638033  |
| GYP2        | 2.869192 | 0.001511 | 3641780  |
| C6_04060W_A | 2.866542 | 0.003825 | 3647828  |
| C1_06190C_A | 2.864881 | 0.006711 | 3648391  |
| C1_02490C_A | 2.856406 | 0.032734 | 3636853  |
| PRC3        | 2.853337 | 0.002892 | 3639889  |
| POL2        | 2.851164 | 0.010539 | 3645733  |
| CR_02770C_A | 2.851109 | 0.024039 | 3642581  |
| C5_01420W_A | 2.84678  | 0.017499 | 3647055  |
| GPR1        | 2.842382 | 0.001048 | 3642616  |
| SIM1        | 2.835401 | 0.009317 | 3636185  |
| CR_03690W_A | 2.83469  | 0.011572 | 3643222  |
| PPZ1        | 2.831172 | 0.00469  | 3645265  |
| ARP8        | 2.829629 | 0.000274 | 3640200  |
| ARL3        | 2.825537 | 0.023834 | 3644397  |
| APT1        | 2.823035 | 0.027171 | 3635842  |
| TPI1        | 2.819501 | 0.001    | 3638482  |
| TFS1        | 2.81871  | 0.001057 | 3642655  |
| C2_04410W_A | 2.811249 | 0.033017 | 3645455  |
| TLG2        | 2.804966 | 0.024478 | 3635773  |
| YCS4        | 2.802457 | 0.002712 | 3645196  |
| RAD6        | 2.800565 | 0.016537 | 3643143  |
| HHF22       | 2.800539 | 0.011789 | 3647327  |
| PEP3        | 2.795462 | 0.02109  | 3639267  |
| C2_02840C_A | 2.790663 | 0.014798 | 3642976  |
| SGT1        | 2.785465 | 0.000485 | 3644068  |
| ALT1        | 2.784704 | 0.012629 | 3638307  |
| VAN1        | 2.784665 | 0.000802 | 3638527  |
| C6_02410W_A | 2.778859 | 0.002798 | 3645884  |
| CR_08560C_A | 2.777187 | 0.00369  | 3642142  |
| C1_08490W_A | 2.775663 | 0.003658 | 3646492  |
| ETR1        | 2.775257 | 0.000412 | 3640561  |
| C7_01160C_A | 2.775065 | 0.027346 | 30515351 |
| C6_02810C_A | 2.769963 | 0.003076 | 3639248  |
| CDC55       | 2.768113 | 0.000436 | 3635785  |
| ADP1        | 2.762542 | 0.000591 | 3642458  |
| C2_07440C_A | 2.762063 | 0.025517 | 3645200  |
| CSH3        | 2.761052 | 0.000452 | 3646798  |
| SYN8        | 2.753412 | 0.026446 | 3645120  |
| RPL13       | 2.748658 | 0.001233 | 3636841  |

|             |          |          |          |
|-------------|----------|----------|----------|
| PGA49       | 2.747585 | 0.03008  | 3646525  |
| C6_02680W_A | 2.745854 | 0.017412 | 3639226  |
| C2_10700C_A | 2.745548 | 0.011722 | 3641207  |
| PDC11       | 2.74543  | 0.004294 | 3642780  |
| FGR24       | 2.743752 | 0.006392 | 3643288  |
| C3_00610W_A | 2.741268 | 0.041887 | 3640578  |
| CR_01350C_A | 2.737721 | 0.001217 | 3640166  |
| C2_10630W_A | 2.734481 | 0.009934 | 3641248  |
| YST1        | 2.730951 | 0.001024 | 3643678  |
| CR_04460C_A | 2.728157 | 0.038899 | 3640988  |
| C3_00850C_A | 2.720648 | 0.003642 | 3647748  |
| C1_14040W_A | 2.708295 | 0.003532 | 3643342  |
| SAL6        | 2.707242 | 0.000942 | 3640289  |
| RPL37B      | 2.696582 | 0.003414 | 30515053 |
| C2_06110W_A | 2.689056 | 0.010358 | 3644094  |
| C1_11250W_A | 2.685831 | 0.020544 | 3644556  |
| RPN6        | 2.684824 | 0.008281 | 3645352  |
| VTC3        | 2.682125 | 0.000573 | 3643206  |
| VAS1        | 2.680359 | 0.001979 | 3648340  |
| C4_00170W_A | 2.675472 | 0.0024   | 3645028  |
| ZDS1        | 2.668906 | 0.002369 | 3641103  |
| C5_00050W_A | 2.664519 | 0.02453  | 3647875  |
| PEX1        | 2.664446 | 0.006188 | 3636943  |
| RPL5        | 2.663063 | 0.004708 | 3637057  |
| AKR1        | 2.658719 | 0.000912 | 3636166  |
| C1_09470C_A | 2.65657  | 0.006451 | 3634761  |
| AGO1        | 2.650296 | 0.00347  | 3642828  |
| DPS1-1      | 2.649204 | 0.00245  | 3645134  |
| GCF1        | 2.646993 | 0.003502 | 3646498  |
| ADE5,7      | 2.646912 | 0.005433 | 3640719  |
| MSK1        | 2.646783 | 0.030873 | 3637032  |
| CR_08130W_A | 2.645768 | 0.025447 | 3642070  |
| C2_00400C_A | 2.637896 | 0.006193 | 3638821  |
| SUR7        | 2.637455 | 0.001984 | 3641610  |
| C3_06490W_A | 2.637018 | 0.009531 | 3642285  |
| C1_14180W_A | 2.632919 | 0.022925 | 3643324  |
| POX1-3      | 2.627403 | 0.021021 | 3636598  |
| C6_00190W_A | 2.627343 | 0.020071 | 3646080  |
| RPL6        | 2.626444 | 0.002115 | 30514975 |
| C5_00750C_A | 2.622795 | 0.005791 | 3644121  |
| ACP1        | 2.621476 | 0.008855 | 3639825  |
| URA4        | 2.615413 | 0.012625 | 3642632  |
| MAC1        | 2.611606 | 0.032286 | 3637985  |
| C4_02780W_A | 2.607419 | 0.003238 | 3637902  |
| ILV3        | 2.599883 | 0.005369 | 3636428  |
| C1_13060C_A | 2.598583 | 0.004164 | 3636123  |
| C1_04980C_A | 2.597589 | 0.006866 | 3647529  |

|             |          |          |          |
|-------------|----------|----------|----------|
| C5_00580W_A | 2.595371 | 0.008415 | 3641588  |
| RNR21       | 2.594976 | 0.008114 | 3643021  |
| C3_01820W_A | 2.593932 | 0.015303 | 3636584  |
| MRP2        | 2.593906 | 0.02456  | 3636498  |
| DAP2        | 2.587679 | 0.010822 | 3637815  |
| RPD31       | 2.58137  | 0.007112 | 3638520  |
| CST20       | 2.580029 | 0.018185 | 3637790  |
| ARC1        | 2.579689 | 0.00125  | 3645108  |
| C1_00660C_A | 2.576965 | 0.001323 | 3639376  |
| ARP9        | 2.575517 | 0.031686 | 3639829  |
| RPL3        | 2.573651 | 0.006478 | 3647719  |
| CDC47       | 2.565239 | 0.013768 | 3645780  |
| RAC1        | 2.560721 | 0.001545 | 3639508  |
| NUP159      | 2.557997 | 0.004657 | 3647458  |
| MED16       | 2.557144 | 0.007772 | 3646725  |
| SRD1        | 2.557004 | 0.029122 | 3635764  |
| SLC1        | 2.552063 | 0.033172 | 3638324  |
| C2_05580W_A | 2.5496   | 0.003617 | 3645563  |
| C1_14090W_A | 2.547684 | 0.011685 | 30515079 |
| C2_00060C_A | 2.547452 | 0.000644 | 3647914  |
| C7_00790W_A | 2.545386 | 0.009811 | 3637943  |
| C3_04360W_A | 2.539839 | 0.012354 | 3635276  |
| C1_12920C_A | 2.539525 | 0.031273 | 3636155  |
| C2_09930W_A | 2.535502 | 0.024276 | 3643824  |
| ALG7        | 2.533538 | 0.031237 | 3642291  |
| C2_01340W_A | 2.531677 | 0.002106 | 3638844  |
| C1_11600W_A | 2.526713 | 0.036845 | 3645346  |
| GLO1        | 2.5266   | 0.012857 | 3639312  |
| C1_02240W_A | 2.522099 | 0.001326 | 3644597  |
| CR_08620C_A | 2.5192   | 0.039809 | 3642110  |
| TIM44       | 2.518772 | 0.001413 | 3640529  |
| ASR3        | 2.516094 | 0.002341 | 3637402  |
| TUF1        | 2.515857 | 0.002456 | 3639360  |
| TAF14       | 2.511776 | 0.009037 | 3637357  |
| RPT4        | 2.511226 | 0.002027 | 3640966  |
| C2_03900C_A | 2.51117  | 0.002325 | 3637395  |
| TRP5        | 2.510456 | 0.001549 | 3648087  |
| C3_01910C_A | 2.509564 | 0.016434 | 30515182 |
| GBP2        | 2.508828 | 0.001745 | 3637992  |
| ZCF31       | 2.506743 | 0.003085 | 3635191  |
| C1_12430W_A | 2.503684 | 0.012375 | 3642013  |
| MSH2        | 2.496618 | 0.037832 | 3642939  |
| PR26        | 2.495842 | 0.001891 | 3642981  |
| C5_00790C_A | 2.493876 | 0.006156 | 3644125  |
| AVT4        | 2.493262 | 0.010725 | 3645316  |
| C1_02700C_A | 2.493246 | 0.008607 | 30514972 |
| CR_01820W_A | 2.486681 | 0.005165 | 3640164  |



|             |          |          |          |
|-------------|----------|----------|----------|
| PKH2        | 2.486447 | 0.006137 | 3642058  |
| CR_00350W_A | 2.486252 | 0.002839 | 3639686  |
| C2_00570W_A | 2.485359 | 0.004514 | 3638853  |
| C1_12170C_A | 2.484182 | 0.032664 | 3642039  |
| C1_09360C_A | 2.483945 | 0.001885 | 3634807  |
| C1_05720W_A | 2.481875 | 0.007863 | 30515000 |
| SMT3        | 2.481254 | 0.003913 | 3644550  |
| INT1        | 2.47867  | 0.004335 | 3637761  |
| CR_09190C_A | 2.476473 | 0.041326 | 3641885  |
| C4_06770W_A | 2.472649 | 0.01103  | 3642920  |
| C1_12830C_A | 2.471621 | 0.009871 | 3636176  |
| C2_08270C_A | 2.470841 | 0.019301 | 3642347  |
| CR_03860C_A | 2.466454 | 0.011641 | 3643186  |
| RPN3        | 2.465335 | 0.002217 | 3636917  |
| C2_00320W_A | 2.463224 | 0.03058  | 3638798  |
| UBI3        | 2.458014 | 0.010471 | 3642934  |
| EBP7        | 2.457885 | 0.036105 | 3642971  |
| CR_00490W_A | 2.457503 | 0.010039 | 3639723  |
| CR_09100C_A | 2.454357 | 0.0156   | 3641928  |
| C1_04860W_A | 2.450997 | 0.003806 | 3644784  |
| C3_05150W_A | 2.450223 | 0.004831 | 3635162  |
| SAC6        | 2.448943 | 0.008342 | 3639213  |
| C1_07050C_A | 2.444034 | 0.017096 | 3639532  |
| C1_12660W_A | 2.443348 | 0.044369 | 3646835  |
| GDI1        | 2.44323  | 0.002406 | 3643298  |
| LTE1        | 2.436734 | 0.016687 | 3643495  |
| PEP1        | 2.432599 | 0.002108 | 3647612  |
| NTH1        | 2.431692 | 0.004366 | 3639665  |
| COQ6        | 2.430954 | 0.008512 | 3636878  |
| TCP1        | 2.430817 | 0.007103 | 3646499  |
| FDH3        | 2.425506 | 0.006981 | 3638923  |
| C1_02040C_A | 2.424704 | 0.009048 | 3644586  |
| NMT1        | 2.424194 | 0.008929 | 3635624  |
| ALG2        | 2.41914  | 0.03045  | 3647832  |
| MKC1        | 2.419032 | 0.002569 | 3639710  |
| RLM1        | 2.412727 | 0.004515 | 3635703  |
| C5_02230W_A | 2.408661 | 0.001979 | 3637708  |
| C2_10460C_A | 2.401298 | 0.016443 | 3641195  |
| UBP13       | 2.40124  | 0.003194 | 3638879  |
| CR_06560C_A | 2.400257 | 0.018848 | 3648367  |
| C1_11850W_A | 2.400051 | 0.00986  | 3642010  |
| GCV3        | 2.393073 | 0.003768 | 3636194  |
| MID1        | 2.392555 | 0.03482  | 3647441  |
| VPH1        | 2.386094 | 0.004831 | 3646157  |
| C2_02000W_A | 2.38584  | 0.002237 | 3635767  |
| UBP6        | 2.383399 | 0.004237 | 3639317  |
| C4_04720W_A | 2.380394 | 0.026887 | 3641137  |

|             |          |          |          |
|-------------|----------|----------|----------|
| C1_08690W_A | 2.380315 | 0.034208 | 3634934  |
| RPS13       | 2.378904 | 0.005715 | 30515328 |
| ECM4        | 2.378816 | 0.007525 | 3640144  |
| FDH1        | 2.377671 | 0.029389 | 3646398  |
| RPS5        | 2.375371 | 0.007896 | 3637700  |
| HPC2        | 2.374576 | 0.032738 | 3636188  |
| PSD2        | 2.373384 | 0.008722 | 3636515  |
| C1_11140W_A | 2.371379 | 0.021936 | 3644410  |
| COX8        | 2.369149 | 0.004316 | 30515130 |
| C2_07190C_A | 2.368284 | 0.022191 | 3643513  |
| SRP101      | 2.363755 | 0.006433 | 3636513  |
| GDA1        | 2.360271 | 0.003074 | 3641762  |
| CR_06930W_A | 2.35925  | 0.048223 | 3648382  |
| C3_02970C_A | 2.358902 | 0.036756 | 3638385  |
| C7_03010W_A | 2.351981 | 0.002354 | 3641382  |
| RPS6A       | 2.345161 | 0.008151 | 3635701  |
| C3_02160C_A | 2.342326 | 0.004675 | 3636654  |
| C1_05780W_A | 2.342054 | 0.00715  | 3639888  |
| RPL2        | 2.33582  | 0.015428 | 30515049 |
| TEC1        | 2.332873 | 0.015211 | 3635261  |
| VAC8        | 2.328072 | 0.005166 | 3647410  |
| RIM13       | 2.327598 | 0.015151 | 3636487  |
| KEM1        | 2.324786 | 0.00532  | 3636222  |
| YRB1        | 2.321083 | 0.003292 | 3639663  |
| BCY1        | 2.320904 | 0.004146 | 3638832  |
| SEC9        | 2.315414 | 0.006128 | 3644052  |
| C4_04390W_A | 2.314898 | 0.010557 | 30515267 |
| C2_00830C_A | 2.313391 | 0.018907 | 3638808  |
| VPS17       | 2.308007 | 0.004111 | 3640218  |
| CR_09530C_A | 2.304961 | 0.00248  | 3647101  |
| C7_02780W_A | 2.300867 | 0.007046 | 3641361  |
| FAD3        | 2.291838 | 0.014276 | 3636124  |
| CR_08640C_A | 2.286219 | 0.018401 | 3642112  |
| PRE10       | 2.283328 | 0.005193 | 3636957  |
| COX7        | 2.283093 | 0.021029 | 3638339  |
| DBP5        | 2.280254 | 0.008376 | 3636564  |
| RPS4A       | 2.280147 | 0.010738 | 3641247  |
| C1_01300W_A | 2.277731 | 0.01847  | 3640185  |
| PUP3        | 2.275124 | 0.009735 | 3646718  |
| C1_04640W_A | 2.267745 | 0.025138 | 3644761  |
| C3_02120W_A | 2.258719 | 0.022929 | 3636658  |
| HPA2        | 2.25868  | 0.021647 | 3647907  |
| MRE11       | 2.258602 | 0.038593 | 3645898  |
| KIN2        | 2.256507 | 0.009758 | 3639697  |
| YBP1        | 2.25359  | 0.024229 | 3636187  |
| RPL4B       | 2.252607 | 0.021008 | 3643347  |
| SWI4        | 2.24906  | 0.031943 | 3645408  |

|             |          |          |          |
|-------------|----------|----------|----------|
| C5_04330W_A | 2.248367 | 0.034588 | 30515314 |
| RIM20       | 2.244668 | 0.013886 | 3634809  |
| C6_00430C_A | 2.242575 | 0.026102 | 3646089  |
| RPS3        | 2.241197 | 0.013664 | 3647299  |
| MGM101      | 2.239454 | 0.044646 | 3636820  |
| C1_10820C_A | 2.2361   | 0.010681 | 3644435  |
| C3_00640W_A | 2.228847 | 0.005676 | 3640574  |
| C1_01400C_A | 2.224377 | 0.02567  | 3640237  |
| C1_04630C_A | 2.223486 | 0.006377 | 3644762  |
| GPD2        | 2.223253 | 0.02713  | 3644563  |
| CR_02300C_A | 2.219137 | 0.006627 | 3644938  |
| C4_06690C_A | 2.219114 | 0.024181 | 30515285 |
| PEX7        | 2.213893 | 0.04455  | 3644027  |
| PKC1        | 2.213257 | 0.012681 | 3635210  |
| DTD2        | 2.192355 | 0.026001 | 3638390  |
| ERF1        | 2.190653 | 0.014138 | 3643455  |
| C3_07850W_A | 2.188425 | 0.02016  | 3647466  |
| C2_04370W_A | 2.186244 | 0.026897 | 3645460  |
| ISN1        | 2.186041 | 0.012845 | 3640196  |
| ECM29       | 2.18266  | 0.012409 | 3638433  |
| C5_04960W_A | 2.18176  | 0.017513 | 3636423  |
| SLA1        | 2.181373 | 0.010844 | 3635739  |
| RPL25       | 2.181262 | 0.023229 | 30515338 |
| MET15       | 2.178993 | 0.036881 | 3645031  |
| C3_06350W_A | 2.176358 | 0.044402 | 30515215 |
| C5_02390C_A | 2.170699 | 0.01366  | 3637795  |
| MAM33       | 2.170545 | 0.035209 | 3643103  |
| VTI1        | 2.161236 | 0.016731 | 3638352  |
| C6_04110W_A | 2.159243 | 0.011662 | 3647834  |
| IRS4        | 2.153176 | 0.030593 | 3645650  |
| SEC15       | 2.148918 | 0.010274 | 3646845  |
| C3_06710W_A | 2.146131 | 0.027401 | 3638448  |
| NPL3        | 2.139368 | 0.018058 | 3643310  |
| C1_03690W_A | 2.132369 | 0.030038 | 3648426  |
| C2_07220W_A | 2.131508 | 0.021893 | 3643483  |
| C4_00500W_A | 2.121184 | 0.037106 | 3648379  |
| PIN3        | 2.119033 | 0.015464 | 3635228  |
| RPL32       | 2.119006 | 0.029863 | 30515335 |
| STB5        | 2.116046 | 0.044705 | 3640208  |
| C3_01800C_A | 2.101643 | 0.039041 | 3636586  |
| C3_05410W_A | 2.0926   | 0.02111  | 3643665  |
| PGA56       | 2.091706 | 0.032416 | 30515313 |
| C1_10680C_A | 2.09026  | 0.01899  | 3647678  |
| YPT52       | 2.086862 | 0.02348  | 3643346  |
| C4_01950W_A | 2.077355 | 0.01997  | 3635665  |
| C5_03980W_A | 2.077315 | 0.027784 | 3647442  |
| CDC53       | 2.075387 | 0.009402 | 3636603  |

|             |          |          |          |
|-------------|----------|----------|----------|
| RPS21B      | 2.075063 | 0.037494 | 30514961 |
| SIT4        | 2.073284 | 0.02656  | 3647993  |
| SRB9        | 2.073225 | 0.037668 | 3635845  |
| SBP1        | 2.071011 | 0.016109 | 3635280  |
| NCP1        | 2.067851 | 0.014001 | 3637839  |
| MNT2        | 2.066764 | 0.040741 | 3636583  |
| C2_02390W_A | 2.064409 | 0.017968 | 3635829  |
| PRE9        | 2.061414 | 0.021737 | 3638311  |
| RPT5        | 2.055811 | 0.016123 | 3642911  |
| CR_04720C_A | 2.05559  | 0.008056 | 3648140  |
| C5_02110W_A | 2.054778 | 0.009876 | 3637732  |
| SNF4        | 2.048692 | 0.010367 | 3640264  |
| C5_02450W_A | 2.048249 | 0.039284 | 3637729  |
| C4_04750W_A | 2.047662 | 0.028634 | 3641133  |
| C2_05040C_A | 2.045811 | 0.012691 | 3643449  |
| ADE17       | 2.043642 | 0.019752 | 3641024  |
| PUP1        | 2.039829 | 0.016712 | 3638936  |
| RPL15A      | 2.037821 | 0.035568 | 3641025  |
| CR_05480W_A | 2.035631 | 0.040118 | 3648238  |
| VRP1        | 2.035001 | 0.034131 | 3642293  |
| C5_03170C_A | 2.034493 | 0.0395   | 3637801  |
| ATC1        | 2.032576 | 0.035082 | 3639570  |
| RPS18       | 2.027343 | 0.041247 | 3637953  |
| NRG1        | -2.0018  | 0.013845 | 3643166  |
| C2_06600W_A | -2.0023  | 0.021268 | 3646563  |
| RIA1        | -2.00571 | 0.021722 | 3644478  |
| C4_02110W_A | -2.00675 | 0.039144 | 3635673  |
| C3_04380C_A | -2.00871 | 0.044612 | 3635173  |
| C2_02490C_A | -2.01263 | 0.010971 | 3635815  |
| MBP1        | -2.01315 | 0.009364 | 3635281  |
| C5_00260W_A | -2.0141  | 0.00978  | 3641561  |
| CR_08400C_A | -2.01583 | 0.045994 | 3642115  |
| PSA2        | -2.01674 | 0.005998 | 3636159  |
| CR_07320C_A | -2.01886 | 0.018868 | 3646057  |
| C1_04370C_A | -2.02286 | 0.026596 | 3647994  |
| CDC37       | -2.02965 | 0.022649 | 3639210  |
| C2_10680W_A | -2.03064 | 0.0189   | 3641252  |
| C1_06910C_A | -2.03454 | 0.022798 | 3639526  |
| C6_03380W_A | -2.03476 | 0.01333  | 3639231  |
| PAM16       | -2.0405  | 0.029587 | 3643321  |
| CR_00820C_A | -2.04081 | 0.029707 | 3640413  |
| C3_05360C_A | -2.04093 | 0.031751 | 3643676  |
| C4_02920W_A | -2.04132 | 0.02585  | 3637878  |
| C4_07130W_A | -2.0447  | 0.022499 | 3642938  |
| SFT2        | -2.05564 | 0.028015 | 3644442  |
| SET2        | -2.05579 | 0.010782 | 3643923  |
| C1_01710W_A | -2.05796 | 0.01231  | 3640201  |

|             |          |          |         |
|-------------|----------|----------|---------|
| TAF145      | -2.06944 | 0.011005 | 3639486 |
| CR_10730C_A | -2.06989 | 0.02251  | 3638998 |
| C2_08240W_A | -2.07185 | 0.004012 | 3642344 |
| C4_06420W_A | -2.07281 | 0.01419  | 3642795 |
| C4_00880W_A | -2.07567 | 0.029069 | 3635681 |
| C2_00740C_A | -2.07611 | 0.005079 | 3638912 |
| C2_00230W_A | -2.07623 | 0.028667 | 3638901 |
| PFK1        | -2.08026 | 0.030307 | 3636448 |
| DUG3        | -2.08157 | 0.008565 | 3641381 |
| ARO10       | -2.08379 | 0.028291 | 3647320 |
| PRS1        | -2.08545 | 0.015758 | 3635817 |
| FTR1        | -2.08631 | 0.039249 | 3643318 |
| WAL1        | -2.09095 | 0.010492 | 3647093 |
| C7_03270W_A | -2.0951  | 0.014857 | 3641365 |
| C5_01090C_A | -2.09513 | 0.045761 | 3642625 |
| C1_10910C_A | -2.0986  | 0.029368 | 3644445 |
| OPY2        | -2.1022  | 0.007803 | 3640765 |
| ADE8        | -2.10476 | 0.044447 | 3642999 |
| PEX5        | -2.10886 | 0.009146 | 3645026 |
| ERB1        | -2.10923 | 0.02442  | 3644702 |
| C6_04290W_A | -2.11456 | 0.003762 | 3646280 |
| ERG3        | -2.12154 | 0.036528 | 3644776 |
| VPS24       | -2.12543 | 0.009285 | 3638892 |
| GRX3        | -2.12631 | 0.008256 | 3637858 |
| C6_03370W_A | -2.12738 | 0.037423 | 3639230 |
| MNL1        | -2.12969 | 0.00794  | 3646050 |
| C3_02630C_A | -2.13058 | 0.043358 | 3638328 |
| C2_00490W_A | -2.13067 | 0.002543 | 3638870 |
| VPS27       | -2.1307  | 0.003039 | 3639326 |
| C5_04180W_A | -2.13876 | 0.0449   | 3636544 |
| SLR1        | -2.13987 | 0.00683  | 3643957 |
| C1_06070W_A | -2.1462  | 0.01612  | 3639824 |
| URK1        | -2.14785 | 0.005156 | 3635186 |
| SEH1        | -2.15224 | 0.01433  | 3642290 |
| BMT5        | -2.15268 | 0.002359 | 3635781 |
| STI1        | -2.15551 | 0.002474 | 3643758 |
| C7_03280C_A | -2.15636 | 0.025764 | 3641353 |
| MXR1        | -2.15817 | 0.042579 | 3638881 |
| IFF9        | -2.15882 | 0.006252 | 3641008 |
| C1_05120W_A | -2.16227 | 0.018887 | 3647667 |
| XYL2        | -2.16953 | 0.009664 | 3638961 |
| SUI3        | -2.17134 | 0.003738 | 3643130 |
| MEF2        | -2.17376 | 0.019698 | 3639564 |
| C1_09540W_A | -2.17422 | 0.020103 | 3634885 |
| NHP2        | -2.1749  | 0.022135 | 3641003 |
| PHO4        | -2.17575 | 0.024248 | 3641817 |
| CR_07250C_A | -2.18569 | 0.033876 | 3646028 |

|             |          |          |          |
|-------------|----------|----------|----------|
| C3_07070C_A | -2.18637 | 0.016746 | 3638446  |
| C1_02900C_A | -2.1867  | 0.04555  | 3636869  |
| C3_04790W_A | -2.18927 | 0.043629 | 3635215  |
| SLU7        | -2.18975 | 0.042475 | 3638501  |
| DOT6        | -2.19029 | 0.009251 | 3640078  |
| C3_06440W_A | -2.19287 | 0.00337  | 3642281  |
| HEM1        | -2.19768 | 0.001781 | 3640149  |
| SMC6        | -2.19928 | 0.009043 | 3637039  |
| BLP1        | -2.20371 | 0.007076 | 30515065 |
| C1_10140C_A | -2.20673 | 0.009261 | 3634780  |
| RHD3        | -2.20735 | 0.003244 | 3641212  |
| C2_03760C_A | -2.21493 | 0.007912 | 3637371  |
| C5_00390C_A | -2.21618 | 0.007393 | 3641552  |
| CR_09480W_A | -2.21823 | 0.019748 | 3641939  |
| C2_05770W_A | -2.22138 | 0.004993 | 3645579  |
| C1_03400W_A | -2.2226  | 0.005097 | 3636904  |
| C2_00770W_A | -2.22428 | 0.017891 | 3638909  |
| C3_03330C_A | -2.2268  | 0.013261 | 3638364  |
| LPG20       | -2.22786 | 0.04991  | 3644780  |
| SEF1        | -2.22788 | 0.006172 | 3644945  |
| CR_02460W_A | -2.22802 | 0.00993  | 3644922  |
| C1_05540C_A | -2.23275 | 0.01934  | 3642503  |
| C5_00820W_A | -2.23536 | 0.017124 | 3644128  |
| KCS1        | -2.24549 | 0.026172 | 3648120  |
| BNA4        | -2.24671 | 0.007279 | 3640528  |
| C2_00170C_A | -2.24708 | 0.009062 | 3638906  |
| C1_06470W_A | -2.26377 | 0.018817 | 30515007 |
| HGT8        | -2.26422 | 0.02121  | 3638875  |
| CKA1        | -2.26474 | 0.006037 | 3639018  |
| SCT1        | -2.2661  | 0.005167 | 3648346  |
| ESA1        | -2.26612 | 0.011141 | 3640518  |
| IFF3        | -2.26652 | 0.006262 | 3643189  |
| C7_04140C_A | -2.26675 | 0.025266 | 3643129  |
| ASR2        | -2.26717 | 0.00238  | 3641907  |
| USO6        | -2.28013 | 0.003912 | 3643647  |
| LIG1        | -2.28379 | 0.001432 | 3636947  |
| C3_04700W_A | -2.29371 | 0.045386 | 3635247  |
| C2_08860W_A | -2.29374 | 0.002746 | 3645776  |
| BUD14       | -2.29562 | 0.005507 | 3643469  |
| WOR4        | -2.29993 | 0.002428 | 3638454  |
| CWT1        | -2.30421 | 0.004501 | 3647595  |
| C3_07490W_A | -2.30434 | 0.001072 | 3638528  |
| GLN3        | -2.30486 | 0.004465 | 3636453  |
| TPS1        | -2.30578 | 0.000815 | 3646699  |
| MTR2        | -2.30678 | 0.021091 | 30515167 |
| DES1        | -2.31046 | 0.003605 | 3636529  |
| CR_03110W_A | -2.31288 | 0.044998 | 3645124  |

|             |          |          |          |
|-------------|----------|----------|----------|
| C5_05140W_A | -2.31357 | 0.023541 | 3636460  |
| C7_00260C_A | -2.31516 | 0.001476 | 3637978  |
| C4_02090C_A | -2.31532 | 0.015604 | 3635642  |
| C5_03150W_A | -2.31715 | 0.004168 | 3637799  |
| C6_03910C_A | -2.32077 | 0.03581  | 3640263  |
| SPL1        | -2.32092 | 0.003789 | 3638035  |
| CR_01370C_A | -2.32223 | 0.003294 | 3640168  |
| SIS1        | -2.32448 | 0.003876 | 3644841  |
| C3_07940W_A | -2.32513 | 0.006611 | 3647453  |
| C1_03120W_A | -2.32878 | 0.000697 | 3636926  |
| STD1        | -2.32966 | 0.005465 | 3647459  |
| PHHB        | -2.3305  | 0.010034 | 3638871  |
| C4_00080C_A | -2.33537 | 0.016156 | 3648065  |
| C2_07370W_A | -2.34011 | 0.024598 | 3645233  |
| C2_07680W_A | -2.34322 | 0.009799 | 3642339  |
| BRO1        | -2.3435  | 0.006208 | 3636590  |
| SAP10       | -2.34569 | 0.007809 | 3641126  |
| SHA3        | -2.34616 | 0.017005 | 3644580  |
| LPI9        | -2.3524  | 0.005425 | 3637060  |
| FTH2        | -2.35334 | 0.0179   | 3640401  |
| C1_14190C_A | -2.35406 | 0.013845 | 3643300  |
| C2_01310W_A | -2.35825 | 0.01314  | 3638788  |
| C1_10230C_A | -2.36481 | 0.004679 | 3634880  |
| CR_01440C_A | -2.36679 | 0.046155 | 30515374 |
| C2_01190C_A | -2.37319 | 0.036316 | 3638859  |
| RTG3        | -2.37325 | 0.003179 | 3644423  |
| CR_04350C_A | -2.37412 | 0.003662 | 3641001  |
| GAP4        | -2.37805 | 0.003272 | 3644463  |
| C6_01340C_A | -2.37839 | 0.026664 | 30515331 |
| C2_10600W_A | -2.38024 | 0.012397 | 3641245  |
| C1_03310W_A | -2.38498 | 0.002896 | 3636856  |
| C3_03370C_A | -2.38727 | 0.001482 | 3638366  |
| C1_01220C_A | -2.38737 | 0.033408 | 3640210  |
| SVF1        | -2.38969 | 0.00225  | 3639289  |
| C5_03440W_A | -2.39013 | 0.041916 | 30515310 |
| C1_09130W_A | -2.39313 | 0.001121 | 3634943  |
| MLS1        | -2.40402 | 0.007537 | 3634875  |
| C2_03500W_A | -2.41337 | 0.001008 | 3637345  |
| CNT         | -2.42223 | 0.002722 | 3644071  |
| IRE1        | -2.42241 | 0.000624 | 3640726  |
| PRB1        | -2.43497 | 0.001819 | 3643521  |
| ZCF9        | -2.43667 | 0.006838 | 3638869  |
| CR_08420W_A | -2.43763 | 0.001255 | 3642117  |
| CR_05910W_A | -2.43968 | 0.016661 | 3646680  |
| C3_00570C_A | -2.44146 | 0.004011 | 3640584  |
| TOP1        | -2.44779 | 0.002889 | 3644034  |
| C3_04720C_A | -2.44834 | 0.009985 | 3635249  |

|             |          |          |         |
|-------------|----------|----------|---------|
| CDR11       | -2.45367 | 0.001964 | 3647389 |
| UTP15       | -2.45422 | 0.013124 | 3643906 |
| C1_01140C_A | -2.45497 | 0.002584 | 3640202 |
| C3_07660W_A | -2.45703 | 0.016651 | 3638462 |
| POP2        | -2.45831 | 0.003713 | 3640301 |
| CR_09920W_A | -2.46226 | 0.028491 | 3639028 |
| C2_02960C_A | -2.47165 | 0.004318 | 3643011 |
| C5_05000C_A | -2.47279 | 0.004906 | 3636539 |
| C3_04920C_A | -2.47449 | 0.000272 | 3635268 |
| BPH1        | -2.47541 | 0.006918 | 3639547 |
| PSP1        | -2.4777  | 0.000884 | 3644551 |
| FAB1        | -2.47854 | 0.000338 | 3635766 |
| CR_09610C_A | -2.484   | 0.004888 | 3647094 |
| MSN4        | -2.48455 | 0.000971 | 3634911 |
| C1_06660W_A | -2.48474 | 0.001594 | 3639542 |
| CAG1        | -2.48569 | 0.042553 | 3636469 |
| DAC1        | -2.48602 | 0.0025   | 3645967 |
| C4_04010W_A | -2.48845 | 0.047982 | 3641218 |
| C1_04220C_A | -2.49046 | 0.017891 | 3644721 |
| C7_00200W_A | -2.49525 | 0.004    | 3637968 |
| HMT1        | -2.49662 | 0.018565 | 3640182 |
| CEK2        | -2.50038 | 0.037994 | 3642459 |
| C2_01820C_A | -2.50528 | 0.019462 | 3635831 |
| MSS51       | -2.51083 | 0.002053 | 3639031 |
| C4_03850W_A | -2.5116  | 0.00169  | 3647853 |
| CKS1        | -2.51193 | 0.005777 | 3647732 |
| CR_03910C_A | -2.51219 | 0.002959 | 3640954 |
| DOT4        | -2.51267 | 0.000273 | 3646810 |
| C2_07640W_A | -2.51405 | 0.000356 | 3645192 |
| C3_03300C_A | -2.51461 | 0.001793 | 3638361 |
| C4_04350W_A | -2.51782 | 0.008565 | 3646852 |
| NMA111      | -2.51889 | 0.000726 | 3640179 |
| NOP1        | -2.51949 | 0.004487 | 3642947 |
| C5_03960W_A | -2.52177 | 0.001594 | 3647444 |
| C2_04850C_A | -2.52195 | 0.002136 | 3648114 |
| C1_10120C_A | -2.52233 | 0.000182 | 3634779 |
| CR_09740W_A | -2.53231 | 0.002569 | 3639008 |
| CR_05640C_A | -2.53512 | 0.036741 | 3646690 |
| GAP5        | -2.53649 | 0.000716 | 3646954 |
| MNN4-4      | -2.53656 | 0.016129 | 3639250 |
| PLB3        | -2.5373  | 0.002017 | 3647089 |
| C6_01450C_A | -2.53834 | 0.027904 | 3641624 |
| TCC1        | -2.54075 | 0.00094  | 3638524 |
| C1_09650W_A | -2.54449 | 0.000841 | 3634870 |
| SST2        | -2.55103 | 0.030604 | 3637754 |
| PNC1        | -2.55209 | 0.004113 | 3646232 |
| C4_01960C_A | -2.55413 | 0.001178 | 3635664 |



|             |          |          |         |
|-------------|----------|----------|---------|
| C3_00500C_A | -2.55533 | 0.008654 | 3640515 |
| NBP2        | -2.5555  | 0.003948 | 3636963 |
| C2_02770W_A | -2.55943 | 0.000162 | 3643031 |
| CR_08040W_A | -2.56299 | 0.000774 | 3644135 |
| SHY1        | -2.5635  | 0.000976 | 3634824 |
| NMD5        | -2.56836 | 0.001344 | 3645745 |
| C1_00520W_A | -2.56923 | 0.007263 | 3639310 |
| CDC34       | -2.57316 | 0.002226 | 3637028 |
| C1_11290W_A | -2.5779  | 0.01042  | 3644553 |
| C2_06090W_A | -2.5804  | 0.007777 | 3644097 |
| C3_07680W_A | -2.58099 | 0.001884 | 3638459 |
| CCC2        | -2.58158 | 0.000849 | 3637821 |
| CR_10400W_A | -2.58159 | 0.00292  | 3638956 |
| PAM18       | -2.58431 | 0.003841 | 3645747 |
| RAT1        | -2.5855  | 0.001482 | 3635686 |
| BRG1        | -2.58765 | 0.005781 | 3647664 |
| C6_00290W_A | -2.59301 | 0.008222 | 3646069 |
| C5_03510C_A | -2.59601 | 0.002889 | 3646969 |
| MNN14       | -2.60094 | 0.001603 | 3643651 |
| UBC8        | -2.60651 | 0.002058 | 3645433 |
| C4_02700W_A | -2.60686 | 0.0155   | 3637859 |
| C6_03540W_A | -2.60781 | 0.024992 | 3640244 |
| SPT5        | -2.60792 | 0.001108 | 3635847 |
| SOK1        | -2.6109  | 0.002547 | 3642495 |
| C4_02570C_A | -2.61354 | 0.014322 | 3637916 |
| NCR1        | -2.61545 | 0.000393 | 3643314 |
| CR_06450W_A | -2.61568 | 0.019482 | 3645279 |
| C4_06990W_A | -2.61784 | 0.010613 | 3642968 |
| PRP45       | -2.61786 | 0.038815 | 3639166 |
| C3_06820C_A | -2.62188 | 0.00015  | 3638544 |
| C6_01620W_A | -2.62842 | 0.004179 | 3641647 |
| C5_01560C_A | -2.63106 | 0.017767 | 3647064 |
| C1_05360C_A | -2.64751 | 0.000501 | 3642482 |
| C5_03640W_A | -2.65064 | 0.002565 | 3646984 |
| FET34       | -2.65196 | 0.002208 | 3647131 |
| NUP49       | -2.65462 | 0.000666 | 3636173 |
| C2_03000C_A | -2.65617 | 0.006965 | 3643022 |
| CR_07480W_A | -2.65927 | 0.000702 | 3646047 |
| CR_05540C_A | -2.66017 | 0.000433 | 3647594 |
| C1_02850W_A | -2.66285 | 0.000357 | 3636862 |
| C1_14580C_A | -2.66295 | 0.000511 | 3643290 |
| C2_02120W_A | -2.66603 | 0.001757 | 3635746 |
| CR_06010W_A | -2.67153 | 0.029191 | 3644870 |
| YTH1        | -2.67288 | 0.003988 | 3645572 |
| ISU1        | -2.67434 | 0.001131 | 3637007 |
| C6_01980C_A | -2.67633 | 0.003592 | 3644560 |
| CR_08330W_A | -2.67827 | 0.009692 | 3642080 |

|             |          |          |         |
|-------------|----------|----------|---------|
| C3_07290W_A | -2.68372 | 0.000311 | 3638430 |
| CR_02890C_A | -2.68647 | 0.002955 | 3642585 |
| C7_01280C_A | -2.68823 | 0.014763 | 3645909 |
| C1_01070C_A | -2.68925 | 0.03524  | 3640172 |
| SSY5        | -2.68968 | 0.000176 | 3642140 |
| C4_03000C_A | -2.70181 | 0.001966 | 3637935 |
| ARG81       | -2.70289 | 0.001013 | 3634775 |
| C6_02930W_A | -2.70688 | 0.000396 | 3639243 |
| MSN5        | -2.7074  | 0.002665 | 3637889 |
| C6_00700C_A | -2.70946 | 0.001741 | 3647074 |
| MRPL27      | -2.70952 | 0.004912 | 3636884 |
| C1_13430C_A | -2.70981 | 0.046233 | 3636223 |
| SPT14       | -2.7129  | 0.000466 | 3641019 |
| CET1        | -2.71607 | 6.64E-05 | 3640140 |
| GPM2        | -2.71749 | 0.003548 | 3644713 |
| C3_05140C_A | -2.72358 | 0.010724 | 3635161 |
| VPS28       | -2.72405 | 0.003128 | 3645794 |
| OFD1        | -2.7294  | 0.000318 | 3646962 |
| NAG1        | -2.7306  | 0.002794 | 3645966 |
| HNM1        | -2.7333  | 0.002526 | 3638857 |
| OYE2        | -2.73679 | 0.002434 | 3641603 |
| C2_01070W_A | -2.73751 | 0.002767 | 3638834 |
| C2_07020C_A | -2.73758 | 0.014698 | 3643497 |
| C1_06540C_A | -2.73981 | 0.00134  | 3639520 |
| C2_05980C_A | -2.74053 | 0.018104 | 3644075 |
| C1_13560W_A | -2.74082 | 0.012612 | 3636174 |
| DRE2        | -2.74729 | 0.000482 | 3642571 |
| DYN1        | -2.75185 | 4.3E-05  | 3635236 |
| HST2        | -2.75368 | 0.008375 | 3640162 |
| C1_09850C_A | -2.7541  | 0.000227 | 3634849 |
| TOR1        | -2.75526 | 0.000426 | 3643480 |
| CR_10420W_A | -2.75592 | 0.001062 | 3638974 |
| C2_07920W_A | -2.76079 | 0.025776 | 3642294 |
| C3_05430W_A | -2.76419 | 0.008281 | 3643667 |
| AUR1        | -2.76493 | 0.00067  | 3642617 |
| RIT1        | -2.76716 | 0.01737  | 3638492 |
| C6_02350C_A | -2.76858 | 0.002905 | 3645881 |
| C6_00640C_A | -2.7738  | 0.011139 | 3647134 |
| C2_10050W_A | -2.78306 | 0.000452 | 3643949 |
| CR_05550C_A | -2.78567 | 0.000741 | 3647593 |
| PDE1        | -2.79259 | 0.005452 | 3637713 |
| C1_14480W_A | -2.79695 | 0.006326 | 3643328 |
| CR_02960W_A | -2.80152 | 0.041053 | 3642591 |
| CR_10800C_A | -2.80169 | 0.000115 | 3638948 |
| NOT5        | -2.80271 | 0.000167 | 3640763 |
| C1_07810C_A | -2.80366 | 0.016038 | 3640708 |
| C4_04660C_A | -2.81234 | 0.000204 | 3641150 |

|             |          |          |          |
|-------------|----------|----------|----------|
| MSU1        | -2.81676 | 0.019955 | 3643919  |
| C5_00570W_A | -2.81954 | 0.000168 | 3641589  |
| C7_03500W_A | -2.8198  | 0.00147  | 3646246  |
| C7_03970C_A | -2.82397 | 0.001157 | 3643117  |
| C6_03220W_A | -2.82732 | 0.022875 | 3639179  |
| C1_03750W_A | -2.82734 | 0.004699 | 3644690  |
| CR_07830C_A | -2.83569 | 0.00022  | 3647345  |
| C3_00940W_A | -2.83685 | 4.85E-05 | 3639851  |
| C2_02540W_A | -2.83778 | 0.000771 | 3635820  |
| C1_07960W_A | -2.84744 | 0.040458 | 3640725  |
| CR_09460C_A | -2.85322 | 0.000132 | 30515453 |
| C1_05650W_A | -2.85894 | 0.008537 | 3639838  |
| C2_00810C_A | -2.85935 | 0.02012  | 3638810  |
| FET3        | -2.86001 | 0.00675  | 3647153  |
| C1_06970C_A | -2.86153 | 0.002072 | 3639567  |
| IFM1        | -2.86212 | 0.000789 | 3641389  |
| CR_06650C_A | -2.86551 | 0.030294 | 3646620  |
| MRPL40      | -2.87014 | 0.000107 | 3640968  |
| PTP1        | -2.87254 | 0.001292 | 3642093  |
| C6_02980C_A | -2.87928 | 1.67E-05 | 3639192  |
| ZCF27       | -2.88703 | 0.001255 | 3635631  |
| DBP2        | -2.89321 | 0.004391 | 3647692  |
| C1_05250W_A | -2.89798 | 0.042817 | 3642462  |
| C2_01370C_A | -2.90139 | 0.000284 | 3635723  |
| CR_06230W_A | -2.90208 | 0.005029 | 3644867  |
| C7_01940C_A | -2.90584 | 0.000229 | 3636971  |
| C7_02550C_A | -2.91475 | 0.003137 | 3637018  |
| PWP2        | -2.91571 | 0.000637 | 3640416  |
| C2_02110C_A | -2.91681 | 0.021209 | 3635745  |
| CCS1        | -2.91993 | 2.81E-05 | 3644476  |
| MAS1        | -2.91999 | 0.001315 | 3636855  |
| EFG1        | -2.9207  | 2.05E-05 | 3644145  |
| CR_02270C_A | -2.92521 | 0.019137 | 3644911  |
| MRPL37      | -2.92748 | 0.015852 | 3644782  |
| C1_04820C_A | -2.93409 | 0.008252 | 3644787  |
| C2_07250C_A | -2.9385  | 0.039552 | 3643487  |
| C3_02030W_A | -2.93939 | 0.0016   | 3636580  |
| VPS13       | -2.94097 | 0.000146 | 3646528  |
| NEP1        | -2.94577 | 0.00447  | 3644545  |
| PES1        | -2.94666 | 0.00056  | 3644105  |
| C4_01500W_A | -2.94723 | 0.004151 | 3635617  |
| BOI2        | -2.94835 | 0.000175 | 3640404  |
| HAL22       | -2.94878 | 0.019885 | 3644051  |
| C2_02420C_A | -2.9502  | 0.002797 | 3635756  |
| ARG4        | -2.95494 | 0.007965 | 3646237  |
| MRPL36      | -2.95864 | 0.001707 | 3643733  |
| VPS21       | -2.95899 | 7.17E-05 | 3642092  |

|             |          |          |          |
|-------------|----------|----------|----------|
| MET4        | -2.96354 | 0.000947 | 3641219  |
| CR_10280W_A | -2.96524 | 0.01031  | 3638934  |
| C1_11900C_A | -2.96812 | 0.004342 | 3642005  |
| C3_02420C_A | -2.9688  | 0.005437 | 3638342  |
| C7_02110W_A | -2.97001 | 3.31E-05 | 3637022  |
| C1_14250C_A | -2.97533 | 0.000578 | 3643307  |
| C5_02280C_A | -2.97634 | 0.000803 | 3637712  |
| ZPR1        | -2.98046 | 0.000289 | 3640177  |
| C1_02210W_A | -2.9861  | 0.000316 | 3644594  |
| EXM2        | -2.98802 | 0.002918 | 3642929  |
| C2_07000W_A | -2.9885  | 0.003447 | 3643534  |
| C2_05270W_A | -2.99257 | 0.000106 | 3643470  |
| PTC5        | -2.99341 | 0.00041  | 3642072  |
| C3_07370W_A | -2.99834 | 0.000174 | 3638474  |
| YCF1        | -3.00733 | 0.00015  | 3636934  |
| C2_00190C_A | -3.01684 | 0.000508 | 3638904  |
| REG1        | -3.01765 | 0.000135 | 3638858  |
| FMT1        | -3.02907 | 0.000908 | 3646530  |
| C3_07430W_A | -3.03116 | 0.000295 | 3638484  |
| CR_05440W_A | -3.03134 | 0.001075 | 3648245  |
| GCA1        | -3.0326  | 0.000724 | 3634903  |
| C3_05790C_A | -3.03536 | 0.012843 | 3641753  |
| CR_03120W_A | -3.03763 | 3.38E-05 | 3645123  |
| C2_02920W_A | -3.04288 | 0.000276 | 3643016  |
| NOP15       | -3.04371 | 0.004366 | 3637966  |
| C2_10170C_A | -3.04851 | 0.000146 | 3643931  |
| CR_00430C_A | -3.04909 | 0.018762 | 30515366 |
| C4_05650W_A | -3.05262 | 0.007611 | 3641814  |
| UTP21       | -3.05587 | 0.000706 | 3635757  |
| RCA1        | -3.06314 | 7.49E-05 | 3639303  |
| C4_01280C_A | -3.06761 | 0.00296  | 3635700  |
| MLH3        | -3.07042 | 0.000521 | 3643294  |
| REP1        | -3.07202 | 0.025849 | 3639708  |
| C3_02890C_A | -3.07526 | 0.032428 | 3638336  |
| C2_06510W_A | -3.07639 | 0.000989 | 3646570  |
| C2_07060W_A | -3.08233 | 0.001346 | 3643500  |
| NOP5        | -3.08587 | 0.001135 | 3646084  |
| ATG15       | -3.08649 | 1.38E-05 | 3641641  |
| C4_01420W_A | -3.08716 | 0.000432 | 3635626  |
| PGA55       | -3.09433 | 0.000316 | 3645784  |
| C5_03700C_A | -3.10371 | 0.004568 | 3646990  |
| C2_06800C_A | -3.1052  | 0.002066 | 3643518  |
| TRY2        | -3.10671 | 0.001554 | 3647670  |
| ULP2        | -3.11037 | 0.006734 | 3643196  |
| FCA1        | -3.11593 | 0.000482 | 30515327 |
| PSO2        | -3.11632 | 0.012344 | 3641241  |
| ALR1        | -3.12237 | 0.000103 | 3636616  |

|             |          |          |          |
|-------------|----------|----------|----------|
| C7_02460C_A | -3.12542 | 0.000162 | 3636946  |
| RTG1        | -3.12825 | 0.000415 | 3634929  |
| RMT2        | -3.13422 | 0.002417 | 3641569  |
| C7_01210C_A | -3.13558 | 0.000683 | 3645904  |
| PHO86       | -3.13755 | 0.002032 | 3642323  |
| TCO89       | -3.13879 | 0.000122 | 3644788  |
| C2_10790C_A | -3.14976 | 0.000392 | 3641242  |
| TUS1        | -3.15282 | 3.83E-05 | 3646144  |
| SLM2        | -3.15457 | 0.000162 | 3647559  |
| C7_01170C_A | -3.155   | 0.004992 | 3645914  |
| CDR1        | -3.15508 | 0.000797 | 3635237  |
| STF2        | -3.15649 | 0.00148  | 30515083 |
| SDS24       | -3.15689 | 0.000654 | 3640756  |
| ZCF28       | -3.15804 | 0.00305  | 3634776  |
| CR_03410W_A | -3.16041 | 0.002352 | 3645136  |
| C1_02380C_A | -3.16229 | 0.046799 | 3636790  |
| MHP1        | -3.16311 | 0.000143 | 3642460  |
| RIM21       | -3.17508 | 8.67E-05 | 3643739  |
| RAD1        | -3.17598 | 7.65E-05 | 3641192  |
| CR_08190W_A | -3.17803 | 0.04488  | 3642084  |
| C6_01550C_A | -3.18627 | 0.004479 | 3641653  |
| C4_07100C_A | -3.18653 | 3.2E-05  | 3642903  |
| C4_00490W_A | -3.19221 | 0.000315 | 3645013  |
| C4_03190W_A | -3.19271 | 0.000921 | 3637838  |
| CR_02970C_A | -3.19866 | 2.01E-06 | 3642603  |
| CR_04170W_A | -3.20698 | 0.000921 | 3640977  |
| SSU72       | -3.20728 | 0.000368 | 3645129  |
| C2_04820W_A | -3.2096  | 0.002729 | 3647776  |
| DFG16       | -3.21613 | 5.75E-05 | 3637413  |
| DAL81       | -3.22294 | 0.001559 | 3640419  |
| STP2        | -3.22489 | 9.59E-05 | 3636214  |
| C1_01580W_A | -3.226   | 0.000321 | 3640222  |
| CR_03260W_A | -3.23109 | 0.000134 | 30515389 |
| C5_02010C_A | -3.2358  | 0.000158 | 3643772  |
| CKA2        | -3.24036 | 0.000248 | 3643444  |
| NBN1        | -3.24372 | 0.00027  | 3637410  |
| TRM12       | -3.2475  | 0.005736 | 3641738  |
| C4_04460C_A | -3.25102 | 1.51E-05 | 3641127  |
| C3_03110W_A | -3.2519  | 0.014905 | 3638400  |
| MIT1        | -3.25397 | 2.02E-06 | 3644089  |
| CHT1        | -3.25446 | 0.015512 | 3639704  |
| CR_07670W_A | -3.25823 | 0.000989 | 3647255  |
| C7_03380W_A | -3.25931 | 0.00332  | 30515359 |
| C3_04620C_A | -3.26686 | 0.002488 | 3635155  |
| C4_05010W_A | -3.26889 | 0.019141 | 3641148  |
| BUL4        | -3.26916 | 9.85E-05 | 3642037  |
| C2_05080C_A | -3.2763  | 0.028824 | 3643453  |

|             |          |          |          |
|-------------|----------|----------|----------|
| C2_05400W_A | -3.27919 | 0.038295 | 3643435  |
| MED3        | -3.2813  | 0.007609 | 3646522  |
| FGR13       | -3.28196 | 0.004796 | 3648078  |
| PCL5        | -3.28527 | 1.69E-05 | 3636466  |
| C4_07060W_A | -3.28624 | 1.33E-06 | 3642908  |
| SPO7        | -3.29722 | 0.000181 | 3645576  |
| RRP6        | -3.2977  | 0.000363 | 3647535  |
| C2_02280W_A | -3.29784 | 5.12E-05 | 3635806  |
| C3_05380W_A | -3.30398 | 0.014952 | 3643679  |
| C6_00170C_A | -3.30769 | 5.52E-05 | 3647903  |
| DUS4        | -3.31066 | 0.000214 | 3641580  |
| DCK2        | -3.3149  | 0.00081  | 3637384  |
| C4_06080W_A | -3.31572 | 0.049228 | 30515280 |
| CR_01780W_A | -3.31706 | 0.01736  | 3640157  |
| C2_03110W_A | -3.32821 | 0.04527  | 3642995  |
| HOS3        | -3.32909 | 2.8E-05  | 3637886  |
| C6_03290W_A | -3.32964 | 6.17E-05 | 3639195  |
| CR_06570C_A | -3.33395 | 0.002279 | 3648366  |
| C4_06210C_A | -3.33559 | 0.00016  | 3642815  |
| C2_10540W_A | -3.33772 | 4.65E-05 | 3641200  |
| PWP1        | -3.33915 | 0.00039  | 3635623  |
| C7_01370W_A | -3.34192 | 0.021971 | 3645901  |
| HN3         | -3.34779 | 0.012038 | 3640093  |
| CR_03940W_A | -3.35787 | 0.001935 | 3648378  |
| PRS5        | -3.36263 | 1.83E-05 | 3642296  |
| FZO1        | -3.36829 | 8.89E-07 | 3646848  |
| C1_11080W_A | -3.36842 | 2.66E-05 | 3644416  |
| NPR2        | -3.36887 | 0.000784 | 3638360  |
| C1_13880C_A | -3.36946 | 9.9E-05  | 3636133  |
| C2_10740C_A | -3.37397 | 1.5E-05  | 3641236  |
| HRR25       | -3.37423 | 1.21E-05 | 3645878  |
| C5_04530W_A | -3.3754  | 0.000236 | 3636507  |
| NAB3        | -3.37794 | 4.18E-05 | 3639209  |
| C7_02120C_A | -3.37902 | 0.013669 | 3637019  |
| AQY1        | -3.38151 | 0.004218 | 3642587  |
| C3_03670W_A | -3.38337 | 3.28E-05 | 3645649  |
| C4_01970W_A | -3.38604 | 0.000106 | 3635663  |
| C4_06620C_A | -3.39862 | 0.006104 | 3642813  |
| C3_06560W_A | -3.39903 | 1.77E-05 | 3642276  |
| C4_04560C_A | -3.40062 | 6.57E-07 | 3641105  |
| C1_11670W_A | -3.40576 | 2.54E-05 | 3645338  |
| YAH1        | -3.40818 | 0.001125 | 3638368  |
| C5_00780C_A | -3.40937 | 0.000365 | 3644124  |
| DUO1        | -3.40958 | 0.031785 | 3646858  |
| C1_09840C_A | -3.41001 | 8.32E-06 | 3634848  |
| C7_01660C_A | -3.41472 | 0.000171 | 3636983  |
| C2_07800W_A | -3.41662 | 0.015515 | 3642325  |

|             |          |          |          |
|-------------|----------|----------|----------|
| RIX7        | -3.42439 | 3.98E-05 | 3637735  |
| HRQ2        | -3.43177 | 0.001865 | 3647850  |
| C3_01130C_A | -3.43836 | 8.63E-05 | 3639901  |
| C3_02180C_A | -3.4436  | 0.000127 | 3636643  |
| PDX3        | -3.44545 | 6.22E-05 | 3640949  |
| C1_02960C_A | -3.45074 | 2.13E-05 | 3636834  |
| SSK1        | -3.45103 | 2.96E-05 | 3636184  |
| AUT7        | -3.45106 | 0.000124 | 30514999 |
| PNG2        | -3.45229 | 2.9E-05  | 3645568  |
| C3_07800C_A | -3.46104 | 0.005819 | 3647461  |
| C1_14380C_A | -3.46599 | 0.000307 | 3643285  |
| C2_02820C_A | -3.4673  | 0.000173 | 3643027  |
| C4_02520C_A | -3.46863 | 4.61E-05 | 3637863  |
| UGT51C1     | -3.47187 | 1.56E-05 | 3640147  |
| C3_05250C_A | -3.47284 | 0.000137 | 3635199  |
| C3_05460W_A | -3.47396 | 0.001406 | 3643670  |
| C5_04290C_A | -3.48567 | 2.79E-05 | 3636455  |
| CR_04240C_A | -3.48647 | 0.000204 | 3640989  |
| C3_06760W_A | -3.48673 | 0.002773 | 3638502  |
| C6_04300W_A | -3.48707 | 0.000309 | 3646286  |
| C7_03210W_A | -3.48981 | 0.004799 | 3641371  |
| CR_07940W_A | -3.49144 | 0.002304 | 3644139  |
| C3_06420C_A | -3.49533 | 7.34E-05 | 3642262  |
| C1_06820W_A | -3.50298 | 2.99E-05 | 3639493  |
| C5_00800C_A | -3.51708 | 7.46E-07 | 3644126  |
| CUP2        | -3.52377 | 4.06E-05 | 3636189  |
| CR_10750C_A | -3.531   | 0.003416 | 3638942  |
| C1_01890C_A | -3.53343 | 1.87E-05 | 3645427  |
| C1_08700W_A | -3.53492 | 1.94E-05 | 3634936  |
| C1_11580W_A | -3.5356  | 1.48E-05 | 3645330  |
| C5_03740W_A | -3.53676 | 0.001485 | 3647237  |
| CR_08940W_A | -3.5383  | 0.000255 | 3641914  |
| YME1        | -3.5395  | 1.21E-05 | 3641816  |
| RPA135      | -3.54165 | 8.4E-05  | 3637996  |
| CR_10060W_A | -3.54383 | 2.49E-05 | 3639035  |
| IMP4        | -3.54486 | 0.000762 | 3644138  |
| TOK1        | -3.54596 | 2.63E-05 | 3645754  |
| C1_07950C_A | -3.54788 | 0.008408 | 3640724  |
| C1_03140W_A | -3.54882 | 5.16E-05 | 3636929  |
| CR_06060W_A | -3.55158 | 0.001528 | 6335358  |
| C2_03570C_A | -3.5532  | 0.007372 | 3637336  |
| C2_09000C_A | -3.56061 | 0.031765 | 3645782  |
| MNN4        | -3.56235 | 1.21E-05 | 3642784  |
| SBA1        | -3.57479 | 7.09E-06 | 3640305  |
| C3_05900W_A | -3.57723 | 0.000119 | 3641739  |
| C3_02900W_A | -3.57779 | 0.001373 | 3638337  |
| ECM17       | -3.57821 | 0.006882 | 3644077  |

|             |          |          |         |
|-------------|----------|----------|---------|
| C1_09390W_A | -3.59193 | 0.002219 | 3634851 |
| C3_03000W_A | -3.59288 | 0.026697 | 3638389 |
| ARG5,6      | -3.59312 | 0.000288 | 3634830 |
| RRP42       | -3.59326 | 0.005025 | 3647852 |
| C7_01150W_A | -3.59511 | 0.001625 | 3645913 |
| C1_07130C_A | -3.59985 | 5.8E-05  | 3644462 |
| C4_06850C_A | -3.59989 | 1.54E-05 | 3642912 |
| C5_03410C_A | -3.59993 | 0.000969 | 3646347 |
| C1_01630W_A | -3.60235 | 2.05E-05 | 3640194 |
| GPD1        | -3.60423 | 0.000597 | 3643924 |
| PET127      | -3.61239 | 7.89E-05 | 3644417 |
| SNT1        | -3.62102 | 1.92E-05 | 3642033 |
| ADA2        | -3.63829 | 6.3E-05  | 3644450 |
| C7_01070C_A | -3.64275 | 1.46E-05 | 3637949 |
| C2_04280W_A | -3.64335 | 0.001809 | 3637326 |
| HSK3        | -3.64351 | 0.003529 | 3635730 |
| EHT1        | -3.64426 | 0.000182 | 3636894 |
| DAL5        | -3.65005 | 0.006604 | 3638401 |
| CR_03660C_A | -3.65445 | 0.000611 | 3643219 |
| KNS1        | -3.66471 | 8.55E-05 | 3636228 |
| C6_00980C_A | -3.66703 | 0.000123 | 3644046 |
| C7_00160C_A | -3.67141 | 5.95E-05 | 3637972 |
| ATO10       | -3.67708 | 0.03437  | 3640394 |
| PFK26       | -3.68104 | 5.26E-05 | 3634912 |
| C1_00270W_A | -3.68301 | 1.93E-07 | 3639300 |
| C1_00860W_A | -3.68601 | 0.000847 | 3639358 |
| C6_04050W_A | -3.69094 | 0.000608 | 3647830 |
| IFM3        | -3.69723 | 0.003997 | 3642335 |
| CR_08500W_A | -3.69773 | 0.000891 | 3642136 |
| CR_06290C_A | -3.69874 | 3.39E-05 | 3644856 |
| TPO4        | -3.70296 | 3.52E-05 | 3640956 |
| C1_10880W_A | -3.70388 | 0.000338 | 3644449 |
| SOD6        | -3.71412 | 0.000813 | 3638899 |
| TRY4        | -3.71588 | 0.035907 | 3635240 |
| C7_01490W_A | -3.72369 | 0.000423 | 3637051 |
| C7_03400C_A | -3.73171 | 8.17E-07 | 3646717 |
| C6_02650C_A | -3.73409 | 0.000687 | 3639223 |
| CRP1        | -3.73728 | 3.22E-05 | 3634826 |
| ZCF29       | -3.73786 | 6.32E-06 | 3641370 |
| MET10       | -3.74192 | 1.17E-05 | 3644088 |
| UTP13       | -3.74298 | 0.000338 | 3637718 |
| C2_01660C_A | -3.74508 | 3.2E-05  | 3635742 |
| CEM1        | -3.74571 | 0.008119 | 3635242 |
| C6_03390W_A | -3.74845 | 0.000655 | 3639232 |
| YTM1        | -3.75106 | 9.65E-05 | 3634765 |
| C2_04770W_A | -3.75207 | 0.003836 | 3647783 |
| YPT53       | -3.75654 | 5.5E-05  | 3642483 |



|             |          |          |         |
|-------------|----------|----------|---------|
| LEU3        | -3.75708 | 9.53E-06 | 3637757 |
| RPA190      | -3.76538 | 2.26E-06 | 3647677 |
| TYE7        | -3.77144 | 0.002068 | 3636203 |
| C4_03020W_A | -3.77999 | 8.74E-07 | 3637934 |
| C3_05860C_A | -3.78135 | 0.000506 | 3641759 |
| C7_02930C_A | -3.78411 | 3.17E-05 | 3641390 |
| RLP24       | -3.79086 | 0.000211 | 3645748 |
| UTP8        | -3.79891 | 1.91E-05 | 3640547 |
| C1_13330C_A | -3.80102 | 3.59E-05 | 3636150 |
| CTR2        | -3.80688 | 1.63E-05 | 3648427 |
| C2_00540W_A | -3.81089 | 1.79E-06 | 3638865 |
| MLP1        | -3.82043 | 2.76E-07 | 3635688 |
| C2_08850C_A | -3.82526 | 6.12E-06 | 3643890 |
| ZCF35       | -3.83601 | 0.000786 | 3641740 |
| C7_01030C_A | -3.83767 | 1.36E-05 | 3638019 |
| GNP3        | -3.84033 | 0.002646 | 3639027 |
| C2_03550C_A | -3.84758 | 1.88E-06 | 3637338 |
| C1_05270C_A | -3.84796 | 4.04E-05 | 3642476 |
| C7_01360C_A | -3.85345 | 0.021148 | 3645900 |
| NOC4        | -3.85767 | 0.000327 | 3645224 |
| RXT3        | -3.8588  | 3.74E-06 | 3643431 |
| C5_01610W_A | -3.85902 | 0.008159 | 3647251 |
| C1_14080W_A | -3.86317 | 3.11E-05 | 3643345 |
| PUS7        | -3.86574 | 8.04E-05 | 3643960 |
| PDE2        | -3.87345 | 2.77E-08 | 3636877 |
| C1_00160C_A | -3.87621 | 5.2E-05  | 3639341 |
| CR_10040W_A | -3.87834 | 0.001044 | 3639034 |
| C4_02850W_A | -3.88395 | 1.88E-07 | 3637910 |
| ELP3        | -3.88519 | 3.36E-06 | 3641747 |
| C5_03460C_A | -3.88551 | 0.00496  | 3646345 |
| RPF1        | -3.88638 | 0.000424 | 3637890 |
| OYE32       | -3.89384 | 3.61E-06 | 3642919 |
| CAN1        | -3.89413 | 0.00042  | 3644035 |
| CR_06330C_A | -3.89685 | 0.003691 | 3644846 |
| C3_01680C_A | -3.90175 | 0.003205 | 3636605 |
| C2_00090W_A | -3.90564 | 0.003667 | 3647910 |
| RAD3        | -3.9158  | 3.9E-06  | 3638014 |
| C4_00460C_A | -3.9181  | 1.3E-06  | 3645010 |
| CR_00460C_A | -3.91901 | 0.000897 | 3639726 |
| TAZ1        | -3.92032 | 0.00047  | 3644108 |
| C1_01750W_A | -3.92051 | 0.01581  | 3645413 |
| C6_04510C_A | -3.9213  | 2.35E-05 | 3645955 |
| C7_00590W_A | -3.9225  | 2.93E-05 | 3637994 |
| RCL1        | -3.92606 | 3.15E-05 | 3645199 |
| UGA3        | -3.93135 | 2.31E-06 | 3638926 |
| C4_00750C_A | -3.9334  | 0.005377 | 3645763 |
| HCH1        | -3.94591 | 0.004425 | 3641626 |

|             |          |          |          |
|-------------|----------|----------|----------|
| C2_04520C_A | -3.94749 | 0.014759 | 3645447  |
| C6_03000C_A | -3.94887 | 0.022899 | 3639194  |
| C1_04720W_A | -3.96917 | 0.000392 | 30514988 |
| SPB1        | -3.97736 | 2.95E-05 | 3648179  |
| RPA34       | -3.99767 | 5.23E-05 | 3634883  |
| DBP3        | -3.99903 | 0.000124 | 3634868  |
| C4_00260W_A | -4.00349 | 1.23E-07 | 3645037  |
| COX17       | -4.00358 | 0.004604 | 30515088 |
| UPC2        | -4.00778 | 9.95E-06 | 3646489  |
| KRR1        | -4.0133  | 3.5E-05  | 3644542  |
| ELF1        | -4.01655 | 2.08E-07 | 3641903  |
| CR_02100C_A | -4.02125 | 0.00016  | 3640141  |
| C1_10440W_A | -4.02218 | 1.27E-05 | 3647180  |
| CR_05150W_A | -4.02252 | 0.012403 | 30515403 |
| CR_04160C_A | -4.03465 | 9.52E-05 | 3640976  |
| PDR6        | -4.03555 | 2.41E-06 | 3638824  |
| C2_09790W_A | -4.04252 | 0.000208 | 3643804  |
| C5_02680W_A | -4.06016 | 6.59E-07 | 3637774  |
| NOC2        | -4.06118 | 2.16E-05 | 3647596  |
| ZCF30       | -4.0709  | 2.6E-06  | 3642051  |
| PUF3        | -4.0724  | 0.000133 | 3646950  |
| C6_04180W_A | -4.07543 | 3.62E-07 | 3648176  |
| MSS116      | -4.0791  | 3.92E-05 | 3634792  |
| BUD5        | -4.08287 | 6.77E-06 | 3647315  |
| SPO11       | -4.08484 | 0.01304  | 3643873  |
| CR_03710C_A | -4.08718 | 1.34E-06 | 3643224  |
| C2_03690C_A | -4.10225 | 0.000298 | 3637376  |
| IML1        | -4.10641 | 6.15E-07 | 3636813  |
| C1_05790W_A | -4.10836 | 0.00255  | 30515002 |
| BMT9        | -4.1388  | 4.84E-06 | 3635654  |
| C5_04910W_A | -4.146   | 0.005108 | 3636417  |
| C6_03590C_A | -4.16086 | 0.002355 | 3640251  |
| CR_03250C_A | -4.16779 | 8.21E-07 | 3645102  |
| MTLA2       | -4.17481 | 0.04499  | 3643766  |
| C4_04510W_A | -4.20407 | 2.44E-06 | 3641120  |
| C5_04170W_A | -4.20533 | 4.64E-07 | 3636543  |
| URA7        | -4.20824 | 7.11E-08 | 3636510  |
| C6_00360C_A | -4.20878 | 0.000699 | 3646083  |
| C1_06840C_A | -4.21718 | 1.76E-07 | 30515012 |
| NOG1        | -4.23265 | 4.16E-05 | 3641736  |
| RAS2        | -4.24752 | 2.88E-06 | 3635211  |
| C7_03590C_A | -4.25322 | 7.96E-06 | 3646239  |
| C4_02690W_A | -4.25856 | 8.06E-07 | 3637861  |
| C1_08610C_A | -4.25879 | 0.001099 | 3646512  |
| C3_06240C_A | -4.26229 | 0.026397 | 30515213 |
| C1_11880W_A | -4.27516 | 0.001148 | 3642007  |
| RPO41       | -4.27759 | 1.59E-07 | 3639378  |

|             |          |          |         |
|-------------|----------|----------|---------|
| FAL1        | -4.27811 | 1.39E-05 | 3639839 |
| CR_03160W_A | -4.28018 | 0.000356 | 3645117 |
| C2_02570W_A | -4.2815  | 0.001371 | 3635858 |
| C4_02260C_A | -4.28158 | 0.002168 | 3635690 |
| RPF2        | -4.28816 | 0.000836 | 3643467 |
| CR_02510W_A | -4.29192 | 6.6E-08  | 3647694 |
| C2_02630W_A | -4.29504 | 0.000353 | 3635839 |
| C1_13390W_A | -4.30636 | 0.000179 | 3636218 |
| C7_02160W_A | -4.32351 | 0.000254 | 3636994 |
| C1_08890C_A | -4.32738 | 0.011443 | 3634924 |
| C3_00030C_A | -4.32787 | 3.8E-05  | 3640571 |
| DEF1        | -4.32938 | 1.8E-05  | 3639023 |
| CR_08680C_A | -4.33019 | 7.47E-08 | 3642127 |
| C3_05450C_A | -4.33468 | 5.94E-06 | 3643669 |
| HPT1        | -4.34149 | 1.01E-06 | 3643034 |
| CIP1        | -4.3474  | 0.002127 | 3644018 |
| C1_11510C_A | -4.36975 | 2.32E-05 | 3645336 |
| C3_06270C_A | -4.37063 | 8.97E-05 | 3642239 |
| CEF1        | -4.3803  | 1.76E-06 | 3634808 |
| C7_01020C_A | -4.38828 | 3.29E-05 | 3638020 |
| SUR2        | -4.39857 | 1.55E-05 | 3642973 |
| ROA1        | -4.40303 | 7.27E-07 | 3645424 |
| C1_10080W_A | -4.40337 | 0.000817 | 3634814 |
| SUV3        | -4.41035 | 0.000122 | 3645451 |
| C7_01400C_A | -4.41259 | 0.000129 | 3645893 |
| RIM101      | -4.41554 | 1.8E-05  | 3643280 |
| CR_10430C_A | -4.41808 | 0.010896 | 3638975 |
| C1_07560W_A | -4.42422 | 0.000136 | 3646676 |
| C1_06440C_A | -4.4295  | 2.83E-05 | 3639552 |
| CSI2        | -4.43918 | 0.005121 | 3642016 |
| TRY3        | -4.45181 | 3.27E-05 | 3642652 |
| GZF3        | -4.45206 | 5.88E-07 | 3642563 |
| C2_01540W_A | -4.46245 | 6.26E-05 | 3635804 |
| C2_09880C_A | -4.48003 | 2.2E-06  | 3643779 |
| UTP20       | -4.48153 | 6.47E-05 | 3647956 |
| ZCF3        | -4.48344 | 0.000122 | 3645335 |
| C6_03460W_A | -4.49694 | 2.88E-09 | 3640252 |
| C3_05850W_A | -4.49858 | 0.000105 | 3641758 |
| C1_10250C_A | -4.50392 | 0.005427 | 3634882 |
| C3_06700C_A | -4.50615 | 1.68E-06 | 3642247 |
| MTG1        | -4.51593 | 0.000626 | 3645139 |
| C5_00100C_A | -4.52018 | 1.91E-07 | 3647883 |
| DRS1        | -4.52256 | 3.24E-05 | 3639045 |
| C1_08770W_A | -4.52609 | 8.58E-05 | 3634788 |
| HGT19       | -4.5277  | 4.1E-08  | 3640558 |
| C3_03740W_A | -4.53602 | 0.014506 | 3645640 |
| IFH1        | -4.53979 | 7.45E-09 | 3637770 |

|             |          |          |          |
|-------------|----------|----------|----------|
| CIC1        | -4.54511 | 5.05E-05 | 3644059  |
| BUB3        | -4.55221 | 3.32E-08 | 3646362  |
| PUT2        | -4.55655 | 2.01E-05 | 3636439  |
| C1_11680C_A | -4.56191 | 0.002364 | 30515056 |
| CR_06840W_A | -4.56754 | 2.35E-06 | 3647322  |
| PRP39       | -4.57121 | 0.002777 | 3635832  |
| C2_05810W_A | -4.57632 | 2.34E-07 | 3647481  |
| CR_03200C_A | -4.57877 | 1.17E-06 | 3645131  |
| NDT80       | -4.58601 | 9.32E-08 | 3638840  |
| HAP2        | -4.60069 | 5.28E-07 | 3641800  |
| LAS1        | -4.61154 | 1.14E-06 | 3644073  |
| PDR16       | -4.61508 | 0.00038  | 3644679  |
| SSF1        | -4.62479 | 8.89E-07 | 3647085  |
| C3_05160C_A | -4.63253 | 1.9E-06  | 3635229  |
| YVH1        | -4.63926 | 0.001084 | 3643218  |
| RSN1        | -4.64145 | 3.69E-06 | 3638308  |
| C4_03830W_A | -4.65145 | 1.61E-05 | 3647851  |
| C3_00620C_A | -4.67078 | 1.13E-06 | 30515171 |
| OPT7        | -4.67608 | 0.002747 | 3645008  |
| C2_00280C_A | -4.6833  | 0.000119 | 3638802  |
| C2_05820W_A | -4.68408 | 1.76E-06 | 3647482  |
| C1_12570C_A | -4.68657 | 1.16E-06 | 3647604  |
| MTG2        | -4.70203 | 3.73E-05 | 3646693  |
| SUA71       | -4.70251 | 7.6E-08  | 3636879  |
| C1_11620W_A | -4.71062 | 0.008458 | 3645344  |
| C2_02270C_A | -4.71499 | 2.59E-05 | 3635805  |
| C2_05640W_A | -4.71541 | 7.4E-08  | 3645566  |
| C4_05230C_A | -4.74678 | 2.7E-05  | 3646156  |
| C4_03740W_A | -4.76711 | 1.73E-05 | 3645357  |
| C6_02290C_A | -4.76731 | 1.52E-06 | 3645873  |
| CR_08410W_A | -4.77097 | 4.77E-08 | 3642116  |
| HAS1        | -4.80055 | 7.6E-07  | 3636443  |
| C2_09980W_A | -4.80576 | 1.3E-07  | 3643965  |
| STB3        | -4.80722 | 8.6E-09  | 3645781  |
| C4_04810C_A | -4.80752 | 6.01E-06 | 3641112  |
| C2_08180C_A | -4.80845 | 2.31E-05 | 3642317  |
| C1_14350W_A | -4.80904 | 2.42E-08 | 3643281  |
| CPA2        | -4.81353 | 7.3E-06  | 3640385  |
| C2_02300W_A | -4.82513 | 4.97E-05 | 3635808  |
| NMD3        | -4.82678 | 1.81E-06 | 3646614  |
| C4_00100C_A | -4.8336  | 1.09E-07 | 3645004  |
| TRK1        | -4.83565 | 4.2E-09  | 3644153  |
| UGA1        | -4.83581 | 0.00076  | 3637329  |
| GYP7        | -4.83697 | 1.22E-08 | 3646245  |
| SEN15       | -4.83914 | 0.000618 | 3646411  |
| C1_13380W_A | -4.84395 | 0.000778 | 3636217  |
| CR_02930W_A | -4.84423 | 2.44E-09 | 3642588  |

|             |          |          |          |
|-------------|----------|----------|----------|
| LIP1        | -4.85864 | 0.001507 | 3634888  |
| RGA2        | -4.86453 | 6.82E-08 | 3635661  |
| C1_06750W_A | -4.86747 | 0.002823 | 3639506  |
| MPP10       | -4.86772 | 6.64E-08 | 3647912  |
| RRP9        | -4.87029 | 1.27E-05 | 3642576  |
| C5_04860C_A | -4.87402 | 0.004953 | 3636437  |
| C4_02330C_A | -4.88452 | 0.00462  | 3637884  |
| C5_04120C_A | -4.89099 | 8.46E-05 | 3636522  |
| C1_05200C_A | -4.905   | 2.41E-06 | 3642466  |
| IFF6        | -4.90968 | 2.3E-08  | 3644087  |
| C2_00650W_A | -4.9098  | 1E-06    | 3638889  |
| ATS1        | -4.9165  | 2.93E-05 | 3642079  |
| C3_01150C_A | -4.92001 | 0.000103 | 3648401  |
| CR_10410C_A | -4.92275 | 4.44E-06 | 3638957  |
| C3_00100W_A | -4.92433 | 4.88E-05 | 3640567  |
| SMM1        | -4.92492 | 5.47E-07 | 3643778  |
| SOF1        | -4.92529 | 3.41E-08 | 3640585  |
| NAR1        | -4.92841 | 1.53E-07 | 3634916  |
| C6_02020C_A | -4.93179 | 5.47E-05 | 3647563  |
| C4_04990C_A | -4.93289 | 0.016644 | 3641166  |
| BRE1        | -4.95033 | 2.76E-09 | 3641568  |
| C5_01020C_A | -4.95366 | 0.025725 | 30515297 |
| RIO2        | -4.95619 | 1.65E-06 | 3642066  |
| RIM2        | -4.96924 | 3.83E-05 | 3645448  |
| C5_04080C_A | -4.97397 | 4.07E-07 | 3647731  |
| OLE2        | -4.97701 | 1.45E-08 | 3643503  |
| C5_05240C_A | -4.98721 | 0.022755 | 3636471  |
| FLO8        | -4.99995 | 2.25E-10 | 3646292  |
| NIP7        | -5.008   | 0.000208 | 3645880  |
| BMS1        | -5.01604 | 4.16E-06 | 3639857  |
| SIP5        | -5.01685 | 5.06E-09 | 3639865  |
| C4_06040W_A | -5.02064 | 0.00046  | 3646521  |
| C1_03840W_A | -5.03051 | 0.043271 | 30514984 |
| C3_01780C_A | -5.03078 | 0.048882 | 30515179 |
| C4_06790W_A | -5.04663 | 7.77E-07 | 3642918  |
| LEU42       | -5.04686 | 1.44E-06 | 3643808  |
| SRP40       | -5.07181 | 7.88E-07 | 3642605  |
| C3_02670W_A | -5.08471 | 0.000766 | 3638405  |
| C5_02020C_A | -5.08612 | 5.19E-10 | 3643771  |
| C4_01240C_A | -5.08764 | 1.03E-05 | 3635705  |
| HGT18       | -5.09597 | 0.000216 | 3645111  |
| C5_01430C_A | -5.09778 | 1.25E-05 | 3647056  |
| C2_08950W_A | -5.12889 | 2.17E-07 | 3645788  |
| C7_04160W_A | -5.17147 | 0.000151 | 3643127  |
| C3_02910W_A | -5.17738 | 0.000584 | 3638378  |
| PUT1        | -5.17828 | 4.06E-07 | 3637779  |
| SDA1        | -5.19089 | 1.98E-05 | 3646688  |

|             |          |          |          |
|-------------|----------|----------|----------|
| CR_07910C_A | -5.1972  | 1.59E-08 | 3644142  |
| RPD3        | -5.19825 | 9.78E-08 | 3642580  |
| SPO72       | -5.21268 | 1.12E-06 | 3644072  |
| FRE10       | -5.21907 | 1.04E-06 | 3646841  |
| C3_02750W_A | -5.2316  | 0.002516 | 3638411  |
| C1_07220W_A | -5.23582 | 1.23E-09 | 3644460  |
| C7_04090C_A | -5.23918 | 1.16E-07 | 3643135  |
| C1_08630W_A | -5.24194 | 6.65E-07 | 3634928  |
| CR_10760C_A | -5.25395 | 0.000168 | 3638943  |
| CR_03870W_A | -5.25479 | 0.000266 | 3643187  |
| C1_12680W_A | -5.26112 | 3.58E-06 | 3646833  |
| C1_07150W_A | -5.26738 | 0.003804 | 30515019 |
| EA3         | -5.26827 | 0.000269 | 3648318  |
| CR_04600W_A | -5.27024 | 3.15E-07 | 3640950  |
| RPN4        | -5.27178 | 8.26E-07 | 3644684  |
| C6_04400W_A | -5.27257 | 0.002865 | 3645949  |
| C1_09320C_A | -5.27267 | 2.81E-09 | 3634834  |
| IFR1        | -5.27339 | 0.004786 | 3643930  |
| MDN1        | -5.29219 | 1.78E-09 | 3635614  |
| C6_03210C_A | -5.30077 | 5.23E-05 | 3639178  |
| C6_02970C_A | -5.30299 | 5.25E-05 | 3639190  |
| PGA37       | -5.30598 | 1.98E-05 | 3636484  |
| C3_07670W_A | -5.31483 | 9.16E-10 | 3638460  |
| ITR1        | -5.32064 | 1.76E-07 | 3643440  |
| C2_08920W_A | -5.32961 | 8.82E-10 | 3645797  |
| POP4        | -5.33969 | 4.57E-05 | 3639241  |
| HBR1        | -5.34142 | 4.99E-06 | 3639295  |
| JIP5        | -5.34309 | 1.57E-07 | 3634922  |
| C1_11610C_A | -5.35095 | 5.13E-07 | 3645345  |
| C1_05440C_A | -5.35127 | 2.04E-10 | 3642489  |
| C1_04510W_A | -5.35261 | 0.000914 | 3646147  |
| NAG3        | -5.35959 | 5.43E-05 | 3645969  |
| C1_01160C_A | -5.38443 | 3.82E-06 | 3640204  |
| CHR1        | -5.3947  | 7.6E-07  | 3647601  |
| PGA48       | -5.39873 | 8.43E-08 | 3647905  |
| CBF1        | -5.41551 | 1.65E-06 | 3642779  |
| C2_06740W_A | -5.41685 | 5.46E-08 | 3648024  |
| CR_07750C_A | -5.43553 | 7.4E-07  | 3647350  |
| CR_03360W_A | -5.44474 | 2.15E-05 | 3645141  |
| PAN6        | -5.44623 | 6.35E-07 | 3647684  |
| ARX1        | -5.45199 | 4.34E-06 | 3636811  |
| C2_06570C_A | -5.46534 | 6.83E-09 | 3646561  |
| C3_02920W_A | -5.48698 | 9.74E-09 | 3638379  |
| DAL8        | -5.48878 | 0.000127 | 3635181  |
| C6_01040C_A | -5.49669 | 2.7E-07  | 3644014  |
| C2_01240C_A | -5.50044 | 0.000825 | 3638794  |
| C7_02660C_A | -5.50425 | 0.002503 | 3647652  |

|             |          |          |          |
|-------------|----------|----------|----------|
| C1_08840W_A | -5.50543 | 0.004486 | 3634919  |
| CR_02550C_A | -5.51144 | 2.89E-07 | 3647689  |
| NOP14       | -5.51458 | 3.23E-07 | 3635266  |
| C5_05340W_A | -5.53991 | 3.5E-08  | 3636400  |
| C4_03350C_A | -5.5429  | 2.72E-06 | 3646794  |
| C3_00410C_A | -5.54572 | 0.008949 | 3640552  |
| BUD22       | -5.5495  | 3.58E-06 | 3640391  |
| C1_13010W_A | -5.55347 | 8.55E-09 | 3636120  |
| RTA3        | -5.57303 | 7.24E-06 | 3646566  |
| OPT4        | -5.57647 | 0.000451 | 3647697  |
| C1_04040C_A | -5.5785  | 1.25E-05 | 3646429  |
| MIF2        | -5.58065 | 9.16E-12 | 3639220  |
| C3_00150W_A | -5.59198 | 7.8E-06  | 3640595  |
| MTM1        | -5.60066 | 4.96E-07 | 3642487  |
| SPB4        | -5.61175 | 0.000422 | 3647252  |
| EPL1        | -5.61716 | 5.33E-09 | 3639732  |
| C3_01110C_A | -5.66031 | 0.025078 | 3639835  |
| CR_06970C_A | -5.66755 | 1.99E-06 | 3645736  |
| C6_01890C_A | -5.66952 | 1.47E-07 | 3641598  |
| ARO80       | -5.67977 | 6.96E-06 | 3636808  |
| C7_02340C_A | -5.69505 | 0.000226 | 3636933  |
| ENP1        | -5.70006 | 1.74E-05 | 3647861  |
| C3_07650C_A | -5.71104 | 0.000169 | 3638488  |
| C1_09040C_A | -5.72031 | 3.68E-06 | 3634769  |
| MUP1        | -5.74086 | 8.92E-11 | 3642008  |
| C4_05590W_A | -5.74128 | 2.46E-09 | 3641776  |
| C3_04690C_A | -5.74719 | 0.002292 | 3635196  |
| RNR3        | -5.74883 | 3.12E-07 | 3647591  |
| MRT4        | -5.7513  | 1.03E-05 | 3639219  |
| C1_10950C_A | -5.76279 | 1.42E-07 | 3644428  |
| C1_09780C_A | -5.7773  | 4.99E-10 | 3634842  |
| LIP4        | -5.7807  | 7.36E-06 | 3645987  |
| C3_02350W_A | -5.78557 | 3.05E-09 | 3636618  |
| C1_11320C_A | -5.78858 | 8.72E-08 | 30515052 |
| LTV1        | -5.79827 | 1.4E-05  | 3639016  |
| C1_00090W_A | -5.80884 | 0.000487 | 3639304  |
| C2_07580W_A | -5.81066 | 0.000562 | 3645216  |
| C6_04240W_A | -5.81245 | 0.000677 | 3646276  |
| CR_04220C_A | -5.82696 | 1.98E-06 | 3640943  |
| C6_03800C_A | -5.84147 | 5.29E-09 | 3640310  |
| C5_01730W_A | -5.86121 | 0.000806 | 3643730  |
| CR_00310C_A | -5.88413 | 9.22E-06 | 3639715  |
| C2_04110W_A | -5.89589 | 0.000696 | 3637378  |
| STE11       | -5.90135 | 8.4E-14  | 3637369  |
| UTP5        | -5.90261 | 1.2E-06  | 3638922  |
| UTP4        | -5.91799 | 8.84E-07 | 3636657  |
| RRN3        | -5.92601 | 3.84E-09 | 3647925  |

|             |          |          |          |
|-------------|----------|----------|----------|
| FAR1        | -5.92929 | 1.94E-06 | 3637970  |
| C1_03830C_A | -5.94456 | 1.26E-05 | 3644678  |
| MDM34       | -5.95436 | 1.71E-09 | 3647517  |
| C4_01090C_A | -5.9549  | 0.002301 | 3635685  |
| NAN1        | -5.95687 | 1.51E-07 | 3637932  |
| OYE23       | -5.97384 | 0.000933 | 3641618  |
| C3_05440C_A | -5.97502 | 0.000167 | 3643668  |
| SFP1        | -5.99508 | 2.91E-10 | 3635225  |
| DBP8        | -6.00226 | 3.3E-06  | 3646692  |
| FHL1        | -6.00796 | 2.04E-07 | 3643493  |
| SSU81       | -6.02013 | 2.51E-07 | 3634944  |
| VTC4        | -6.02273 | 1.37E-08 | 3646795  |
| C6_04530C_A | -6.02795 | 2.81E-11 | 3645970  |
| C3_06370C_A | -6.03667 | 5.74E-09 | 3642258  |
| C4_03580W_A | -6.06655 | 0.001911 | 3645369  |
| MDJ1        | -6.07872 | 3.66E-10 | 3646980  |
| ATG9        | -6.08032 | 1.18E-05 | 3635239  |
| C3_07550C_A | -6.08481 | 2.76E-09 | 3638525  |
| C1_09330W_A | -6.10027 | 0.001317 | 3634802  |
| C2_05830C_A | -6.11966 | 8.88E-07 | 3647483  |
| FGR23       | -6.12346 | 3.54E-08 | 3636555  |
| C3_02840W_A | -6.12618 | 0.000295 | 3638331  |
| SLY41       | -6.12907 | 7.89E-09 | 3647139  |
| C5_00310C_A | -6.14198 | 3.86E-06 | 3641576  |
| CNS1        | -6.14608 | 1.3E-07  | 3639365  |
| WSC1        | -6.15319 | 1.15E-09 | 3635138  |
| COX19       | -6.18619 | 3.61E-07 | 3636220  |
| MRP17       | -6.18731 | 1E-08    | 3641548  |
| CR_08650C_A | -6.20852 | 1E-12    | 3642124  |
| RNR22       | -6.20954 | 2.38E-05 | 3645217  |
| ISA2        | -6.21081 | 6.38E-09 | 3638513  |
| CYC3        | -6.22675 | 1.61E-09 | 3642621  |
| C5_02440C_A | -6.24611 | 7.34E-06 | 3637728  |
| C5_01990W_A | -6.27409 | 0.004263 | 3643774  |
| C6_02790C_A | -6.2776  | 8.85E-10 | 3639245  |
| MAK21       | -6.30487 | 1.69E-10 | 3635147  |
| NCS2        | -6.3225  | 2.72E-07 | 3643216  |
| ATX1        | -6.33018 | 0.000187 | 30515426 |
| CPA1        | -6.34297 | 1.93E-08 | 3635715  |
| SWE1        | -6.36502 | 6.12E-13 | 3634866  |
| HAP42       | -6.37554 | 1.86E-11 | 3635729  |
| HNT1        | -6.39602 | 2.99E-11 | 3644441  |
| MET16       | -6.42483 | 4.23E-06 | 3642964  |
| CR_01630C_A | -6.47694 | 0.001036 | 3640085  |
| RMP1        | -6.47901 | 0.001566 | 3636215  |
| TPS2        | -6.49238 | 5.59E-08 | 3636892  |
| TBF1        | -6.49305 | 5.48E-11 | 3637327  |



|             |          |          |          |
|-------------|----------|----------|----------|
| NOP13       | -6.49953 | 6.7E-08  | 3638469  |
| C4_00690C_A | -6.51313 | 1.31E-07 | 3645752  |
| ALS5        | -6.53915 | 2.21E-10 | 3640277  |
| DAL1        | -6.55188 | 8.82E-06 | 3640564  |
| SUL2        | -6.55569 | 0.000669 | 3637835  |
| NSA2        | -6.56206 | 9.64E-08 | 3642259  |
| C5_02070C_A | -6.5664  | 6.71E-11 | 3643746  |
| ARR3        | -6.57467 | 2.13E-06 | 3642910  |
| BAS1        | -6.59476 | 4.55E-08 | 3641136  |
| C4_04020C_A | -6.60161 | 0.00797  | 3641215  |
| C2_06480W_A | -6.61071 | 2.89E-06 | 3646568  |
| C6_04200C_A | -6.62873 | 2.09E-05 | 30515344 |
| C2_07280W_A | -6.63055 | 0.0021   | 3643475  |
| C1_07530W_A | -6.63628 | 0.001734 | 30515025 |
| HSP104      | -6.66281 | 1.11E-07 | 3642097  |
| ABC1        | -6.66634 | 1.88E-14 | 3640239  |
| C1_09790C_A | -6.66916 | 1.23E-10 | 3634843  |
| C5_04850W_A | -6.69347 | 0.000111 | 3636436  |
| C1_13130C_A | -6.69603 | 3.62E-07 | 3636202  |
| C7_00340C_A | -6.72411 | 1.18E-10 | 3638040  |
| C2_00200W_A | -6.73251 | 1.77E-10 | 3638903  |
| C2_04080W_A | -6.73337 | 2.48E-07 | 3637381  |
| PRP8        | -6.7476  | 6.45E-14 | 3642125  |
| C2_04570W_A | -6.75141 | 1.56E-06 | 3645441  |
| ISY1        | -6.75416 | 3.35E-05 | 3646233  |
| NOG2        | -6.7736  | 7.42E-08 | 3640299  |
| CR_06980W_A | -6.78139 | 0.000686 | 3645735  |
| C1_05370C_A | -6.79067 | 1.29E-09 | 3642481  |
| DIP2        | -6.81216 | 9.91E-11 | 3640762  |
| C2_10810W_A | -6.82238 | 5.3E-09  | 3641243  |
| HIP1        | -6.82708 | 1.71E-10 | 3643761  |
| C3_02980C_A | -6.84719 | 1.1E-05  | 3638386  |
| C4_03230C_A | -6.84976 | 0.006842 | 3637836  |
| DED1        | -6.86886 | 2.94E-10 | 3641752  |
| C3_07400W_A | -6.88034 | 9.24E-07 | 3638471  |
| C6_02230W_A | -6.89768 | 1.05E-10 | 3645866  |
| C6_00530C_A | -6.89915 | 0.000106 | 30515326 |
| UTP18       | -6.90076 | 1.01E-08 | 3643123  |
| C4_02740W_A | -6.91502 | 4.85E-10 | 3637855  |
| CR_08080W_A | -6.9452  | 0.000431 | 3642094  |
| RPA12       | -6.97388 | 7.9E-05  | 3643477  |
| GAC1        | -6.98813 | 9.32E-09 | 3638025  |
| RPC10       | -6.99221 | 8.92E-08 | 3643292  |
| C3_02020W_A | -6.99421 | 1.86E-08 | 3636592  |
| RRP8        | -6.99431 | 6.27E-06 | 3643900  |
| KAR4        | -6.99871 | 2.59E-05 | 3644937  |
| C4_07040W_A | -6.99966 | 0.000567 | 3642963  |

|             |          |          |          |
|-------------|----------|----------|----------|
| C1_06090C_A | -7.00681 | 7E-12    | 3639822  |
| ICL1        | -7.00721 | 8.16E-12 | 3646146  |
| C5_03630C_A | -7.03356 | 0.000154 | 3646983  |
| ECM22       | -7.10015 | 7.92E-11 | 3648000  |
| MRF1        | -7.10034 | 4.96E-11 | 3645321  |
| CR_04920W_A | -7.11106 | 4.42E-10 | 3648207  |
| C2_10130W_A | -7.12272 | 0.003127 | 3643935  |
| RRP15       | -7.14049 | 1.04E-07 | 3648397  |
| RRN11       | -7.14683 | 1.59E-07 | 3645276  |
| TSR1        | -7.16341 | 4.38E-08 | 3642135  |
| C2_05160C_A | -7.19927 | 1.18E-09 | 3643461  |
| C1_01620C_A | -7.21248 | 3.75E-12 | 3640193  |
| C1_13250W_A | -7.23586 | 1.91E-14 | 3636143  |
| CR_08470W_A | -7.23886 | 1.26E-09 | 3642134  |
| NOP8        | -7.24282 | 1.83E-07 | 3646290  |
| HSX11       | -7.26821 | 0.000346 | 3635660  |
| RSM22       | -7.32644 | 3E-11    | 3642506  |
| UTP9        | -7.38702 | 5.02E-12 | 3638451  |
| MET2        | -7.41692 | 5.73E-13 | 3640070  |
| ARG1        | -7.44265 | 1.94E-10 | 3639691  |
| C6_01590W_A | -7.47163 | 9.5E-13  | 3641650  |
| DHH1        | -7.4789  | 3.68E-07 | 3639490  |
| C3_07470W_A | -7.48452 | 0.02648  | 3638479  |
| DBP7        | -7.50389 | 2.83E-10 | 3645903  |
| GRF10       | -7.55158 | 5.63E-14 | 3636492  |
| FUN31       | -7.55201 | 4.37E-12 | 3642249  |
| CR_00810W_A | -7.57144 | 1.48E-05 | 3640415  |
| C2_05060C_A | -7.59772 | 0.00065  | 3643451  |
| C4_07170C_A | -7.59973 | 9.76E-05 | 30515289 |
| C2_09610W_A | -7.62331 | 2.83E-09 | 3643798  |
| CR_01410C_A | -7.63714 | 4.48E-06 | 3640136  |
| WHI3        | -7.65149 | 3.14E-11 | 3636991  |
| MET3        | -7.66063 | 9.42E-06 | 3636132  |
| MAK5        | -7.67015 | 1.64E-08 | 3643454  |
| RFX1        | -7.7108  | 5.83E-07 | 3644844  |
| C1_10970W_A | -7.71941 | 4.08E-09 | 3644427  |
| SAS10       | -7.72373 | 4.35E-12 | 3637899  |
| CR_02030C_A | -7.76872 | 1.09E-08 | 3640152  |
| C4_05970W_A | -7.83818 | 1.72E-12 | 3646514  |
| C2_02580W_A | -7.84469 | 2.49E-08 | 3635860  |
| CR_07030C_A | -7.84653 | 9.73E-06 | 3645730  |
| C2_09500W_A | -7.85019 | 6.07E-09 | 3643817  |
| SLD1        | -7.85149 | 1.61E-12 | 3638406  |
| FTH1        | -7.85767 | 4.35E-09 | 3634852  |
| RAD18       | -7.85969 | 0.000397 | 3641637  |
| C6_03200W_A | -7.88488 | 4.63E-14 | 3639177  |
| C7_00330C_A | -7.90078 | 6.4E-09  | 3638042  |

|             |          |          |          |
|-------------|----------|----------|----------|
| CTA8        | -7.90116 | 1.19E-12 | 3634947  |
| C2_04120C_A | -7.90423 | 1.59E-06 | 3637377  |
| RGS2        | -7.93419 | 7.88E-08 | 3646629  |
| C2_05840W_A | -7.94775 | 1.01E-08 | 3647484  |
| CUP9        | -7.99484 | 2.93E-09 | 3636950  |
| C2_09160W_A | -8.01512 | 2.22E-06 | 3644090  |
| ARG8        | -8.02797 | 1.37E-05 | 3641131  |
| PHR3        | -8.05879 | 2.74E-17 | 3645003  |
| C1_11000C_A | -8.15786 | 1.11E-05 | 3644422  |
| ATG1        | -8.16109 | 8.06E-15 | 3641175  |
| C1_14330W_A | -8.18882 | 3.68E-08 | 3643278  |
| FEN1        | -8.21829 | 1.15E-08 | 3646829  |
| NBP35       | -8.24348 | 1.07E-11 | 3647412  |
| COX11       | -8.25985 | 1.14E-13 | 3646842  |
| CR_03980W_A | -8.27039 | 5.03E-08 | 3640964  |
| C3_01560W_A | -8.27182 | 2.62E-08 | 3636669  |
| JEN2        | -8.33948 | 3.44E-05 | 3641214  |
| C1_09520C_A | -8.36705 | 2.25E-16 | 3634766  |
| ALS6        | -8.37104 | 3.96E-09 | 3642266  |
| C3_06160C_A | -8.43561 | 1.01E-08 | 3641766  |
| C4_05160C_A | -8.46675 | 5.37E-14 | 3647411  |
| C5_03920C_A | -8.4865  | 5.47E-08 | 3647448  |
| SNQ2        | -8.55478 | 2.29E-17 | 3640290  |
| C2_07410W_A | -8.55535 | 6.02E-06 | 3645203  |
| C1_09710C_A | -8.57645 | 6.02E-10 | 3634818  |
| C3_07580W_A | -8.60595 | 3.1E-07  | 30515225 |
| C1_11020W_A | -8.61352 | 2.86E-07 | 3644420  |
| ENP2        | -8.64923 | 1.15E-09 | 3646234  |
| CR_08580C_A | -8.65853 | 2.4E-06  | 3642105  |
| C2_04700C_A | -8.67013 | 8.72E-05 | 3647794  |
| C3_01770C_A | -8.6894  | 2.36E-08 | 3636588  |
| CR_06550C_A | -8.71063 | 2.79E-11 | 3645260  |
| BUD21       | -8.71952 | 3.34E-10 | 3640541  |
| C5_03800W_A | -8.72835 | 1.14E-11 | 3647230  |
| SSY1        | -8.72861 | 4.45E-10 | 3637382  |
| ALS9        | -8.76378 | 1.26E-10 | 3640281  |
| RMS1        | -8.77622 | 3.63E-07 | 3646361  |
| C1_01510W_A | -8.8363  | 3.49E-14 | 3640229  |
| SCH9        | -8.83899 | 4.26E-13 | 3637421  |
| NSA1        | -8.8439  | 3.66E-06 | 3642313  |
| HGT17       | -8.85672 | 0.000272 | 3635687  |
| PRP5        | -8.87469 | 3.57E-12 | 3638447  |
| C2_08700C_A | -8.93455 | 1.68E-14 | 3643887  |
| MFG1        | -8.96621 | 7.2E-13  | 3643884  |
| C1_06760C_A | -9.0209  | 2.47E-08 | 3639505  |
| C3_05800W_A | -9.0724  | 1.01E-10 | 3641754  |
| C6_02150C_A | -9.07534 | 0.000187 | 3645888  |

|             |          |          |          |
|-------------|----------|----------|----------|
| C4_02770C_A | -9.10428 | 4.09E-07 | 3637903  |
| C6_01780C_A | -9.13343 | 1.97E-08 | 3641636  |
| CR_00750C_A | -9.15881 | 4.74E-09 | 3640438  |
| C1_06510C_A | -9.22105 | 5.07E-12 | 3639549  |
| ECM1        | -9.23715 | 3.9E-06  | 3641224  |
| C6_00380C_A | -9.24347 | 2.4E-09  | 3646085  |
| HEM3        | -9.24701 | 1.18E-11 | 3643940  |
| C3_02040C_A | -9.27884 | 7.98E-09 | 3636579  |
| KTI12       | -9.29603 | 6.24E-07 | 3645140  |
| HSP78       | -9.34757 | 8.36E-14 | 3637414  |
| C4_00810C_A | -9.36184 | 1.05E-06 | 3645742  |
| NOP4        | -9.40279 | 6.55E-11 | 3647991  |
| ELA1        | -9.4188  | 2.62E-09 | 3644680  |
| QDR3        | -9.43295 | 8.11E-09 | 3644023  |
| C2_05750W_A | -9.49453 | 6.87E-08 | 3645577  |
| C7_01690W_A | -9.59781 | 1.52E-08 | 3636980  |
| OPT8        | -9.60615 | 5.96E-09 | 3640266  |
| HIT1        | -9.62211 | 2.02E-05 | 3637854  |
| PGA57       | -9.62257 | 4.04E-05 | 3635608  |
| C1_12440W_A | -9.65442 | 0.001993 | 3642012  |
| HCA4        | -9.69214 | 5.08E-10 | 3637911  |
| CR_03670W_A | -9.71746 | 0.009427 | 3643220  |
| C6_03280W_A | -9.71746 | 0.009436 | 3639185  |
| ZCF2        | -9.73021 | 3.43E-20 | 3642484  |
| WAR1        | -9.75776 | 2.19E-09 | 3644691  |
| C4_02230C_A | -9.82717 | 0.045006 | 3635693  |
| C1_06870C_A | -9.82869 | 0.045008 | 30515013 |
| NAG4        | -9.82922 | 0.045001 | 3645978  |
| ALK6        | -9.82922 | 0.045001 | 3637045  |
| CR_04610C_A | -9.82922 | 0.045001 | 3640951  |
| C1_05150C_A | -9.82922 | 0.045001 | 3642469  |
| C1_09300C_A | -9.82922 | 0.045001 | 3634831  |
| C4_07020C_A | -9.82922 | 0.045001 | 3642965  |
| CR_09140C_A | -9.88022 | 4.05E-20 | 3641879  |
| C2_04090W_A | -9.90417 | 0.02205  | 3637380  |
| C2_01060C_A | -9.92345 | 3.44E-07 | 3638835  |
| C2_08030W_A | -9.92686 | 4.82E-08 | 3642309  |
| GCA2        | -9.95286 | 5.85E-12 | 3647194  |
| IFE2        | -10.044  | 3.44E-12 | 3648027  |
| C5_04840C_A | -10.196  | 1.03E-11 | 3636435  |
| C1_05160C_A | -10.2174 | 2.24E-14 | 3642468  |
| C1_04710C_A | -10.2212 | 4.1E-09  | 3644764  |
| CR_02420W_A | -10.2724 | 3.8E-09  | 3644926  |
| C1_12750C_A | -10.2778 | 1.2E-09  | 3646818  |
| PTC8        | -10.3207 | 1.67E-13 | 3635674  |
| PRN1        | -10.3397 | 1.42E-06 | 3639882  |
| SEN2        | -10.4031 | 3.56E-11 | 3637832  |

|             |          |          |          |
|-------------|----------|----------|----------|
| MIH1        | -10.444  | 1.96E-15 | 3648188  |
| C3_06940W_A | -10.448  | 1.09E-16 | 3638509  |
| FET31       | -10.4727 | 2.15E-09 | 3647151  |
| C1_05330C_A | -10.5328 | 9.39E-12 | 3642485  |
| C2_09820W_A | -10.6522 | 1.45E-09 | 3643801  |
| C5_02980C_A | -10.6605 | 7.17E-08 | 3637816  |
| C2_10090C_A | -10.7222 | 6.39E-11 | 3643939  |
| SGD1        | -10.7521 | 3.18E-13 | 3643191  |
| CR_01710W_A | -10.7931 | 2.34E-07 | 3640130  |
| ARF1        | -10.8256 | 5.95E-18 | 3642130  |
| C5_02640W_A | -10.9062 | 1.15E-08 | 3637785  |
| C2_09660W_A | -11.0011 | 2.61E-13 | 3643793  |
| CR_10470C_A | -11.154  | 2.21E-12 | 3638979  |
| GST2        | -11.1961 | 2.43E-14 | 3637937  |
| GCV2        | -11.2643 | 4.01E-11 | 3646505  |
| C1_04120C_A | -11.3081 | 2.64E-05 | 3644701  |
| C2_06660W_A | -11.41   | 3.6E-06  | 3648418  |
| CR_02800C_A | -11.4213 | 3.07E-11 | 3642559  |
| CR_08830W_A | -11.4516 | 4.41E-14 | 30515450 |
| HBR3        | -11.5197 | 2.21E-12 | 3645652  |
| MAK16       | -11.5998 | 1.73E-11 | 3646920  |
| RRS1        | -11.6173 | 3.83E-08 | 3639352  |
| REI1        | -11.6273 | 1.64E-10 | 3647536  |
| TPS3        | -11.6341 | 3.25E-17 | 3641205  |
| C6_00810C_A | -11.7135 | 2.12E-17 | 3647068  |
| ALD6        | -11.7834 | 1.25E-09 | 3647407  |
| C5_02590C_A | -11.817  | 2.41E-10 | 3637723  |
| C6_02950C_A | -11.8331 | 3.29E-07 | 3639188  |
| C2_00410C_A | -11.9145 | 4.01E-17 | 3638820  |
| C1_01150C_A | -11.932  | 1.53E-14 | 3640203  |
| CR_09800C_A | -11.9519 | 2.84E-16 | 3638984  |
| FGR46       | -11.9524 | 0.005539 | 3638989  |
| WOR2        | -12.0815 | 2.47E-07 | 3635230  |
| C1_09210C_A | -12.2688 | 1.07E-17 | 3634897  |
| RCH1        | -12.3116 | 1.24E-11 | 3645002  |
| C7_02610C_A | -12.3493 | 1.21E-11 | 3648285  |
| C3_03250W_A | -12.4092 | 4.22E-13 | 3638318  |
| C1_05930C_A | -12.4534 | 9.87E-15 | 3639862  |
| ALP1        | -12.528  | 2.94E-10 | 3644437  |
| C3_06950W_A | -12.6831 | 1.11E-11 | 3638507  |
| C6_03360C_A | -12.7654 | 4.33E-07 | 3639203  |
| SRR1        | -12.8339 | 5.55E-12 | 3647589  |
| CR_01600C_A | -13.099  | 3.81E-08 | 3640080  |
| C2_00760C_A | -13.1147 | 1.35E-17 | 3638910  |
| C2_04670W_A | -13.1297 | 2.21E-10 | 3647789  |
| C4_05350W_A | -13.2501 | 2.83E-20 | 3646948  |
| NOP6        | -13.4434 | 3.1E-07  | 3639507  |

|             |          |          |         |
|-------------|----------|----------|---------|
| C1_09820C_A | -13.5429 | 3.8E-05  | 3634846 |
| C1_07650W_A | -13.5964 | 5.74E-10 | 3646657 |
| POP3        | -13.6367 | 7.78E-07 | 3638993 |
| HSP21       | -13.6432 | 8.16E-13 | 3637364 |
| C5_04380C_A | -13.8246 | 1.17E-05 | 3636485 |
| FGR47       | -13.8578 | 2.77E-16 | 3641651 |
| C1_07660W_A | -13.9137 | 8.75E-08 | 3646656 |
| C1_01610C_A | -13.9882 | 4.62E-09 | 3640225 |
| C3_05840W_A | -14.0053 | 0.017099 | 3641757 |
| C4_07000W_A | -14.0075 | 0.016343 | 3642967 |
| CR_06870C_A | -14.0082 | 0.016645 | 3647318 |
| C2_08580W_A | -14.2979 | 1.28E-05 | 3643916 |
| TRY6        | -14.3001 | 1.48E-05 | 3638499 |
| C5_01710C_A | -14.3653 | 2.07E-10 | 3643732 |
| RIM8        | -14.5532 | 1.64E-21 | 3639342 |
| C4_04300C_A | -14.6724 | 4.35E-08 | 3646843 |
| CLG1        | -14.7784 | 5.02E-21 | 3646030 |
| IFA14       | -14.8115 | 4.01E-08 | 3639012 |
| C6_03180C_A | -14.8627 | 2.54E-22 | 3639261 |
| QDR2        | -15.3511 | 1.06E-23 | 3643661 |
| C7_01910C_A | -15.7878 | 5.21E-14 | 3637029 |
| C1_11200W_A | -15.8066 | 4.54E-11 | 3644396 |
| C6_01870C_A | -15.8291 | 1.46E-12 | 3641625 |
| C3_01540W_A | -15.8698 | 5.46E-06 | 3636567 |
| C1_06980C_A | -16.0912 | 5.3E-12  | 3639565 |
| C2_08530C_A | -16.1988 | 6.19E-08 | 3643921 |
| SUT1        | -16.3318 | 2.86E-13 | 3637706 |
| C3_04730C_A | -16.4144 | 0.001295 | 3635250 |
| ALS7        | -16.4177 | 7.46E-23 | 3642234 |
| C3_06660C_A | -16.4196 | 0.001207 | 3642253 |
| C1_10360C_A | -16.6332 | 5.81E-21 | 3634836 |
| C1_02450C_A | -16.7018 | 7.11E-08 | 3636849 |
| GCS1        | -16.8061 | 1.67E-22 | 3640742 |
| PZF1        | -16.8434 | 7.07E-10 | 3648113 |
| C7_03850W_A | -16.9359 | 1.25E-10 | 3643145 |
| CYS3        | -16.9492 | 4.67E-21 | 3642081 |
| UTP22       | -16.9777 | 1.75E-22 | 3635760 |
| TSR2        | -17.0869 | 5.82E-12 | 3636845 |
| C1_09770W_A | -17.5023 | 2.07E-16 | 3634825 |
| C2_02190C_A | -17.5448 | 1.32E-12 | 3635753 |
| CIRT4B      | -17.8335 | 1.42E-28 | 3642560 |
| CR_04110W_A | -17.9139 | 1.06E-14 | 3641026 |
| C1_01130W_A | -18.0925 | 8.12E-23 | 3640178 |
| C3_04870W_A | -18.1827 | 0.007122 | 3635226 |
| FGR42       | -18.1827 | 0.007187 | 3647438 |
| C5_00810C_A | -18.1865 | 0.006808 | 3644127 |
| C1_07040C_A | -18.1875 | 0.008427 | 3639533 |

|             |          |          |          |
|-------------|----------|----------|----------|
| C7_02600C_A | -18.4893 | 2.84E-18 | 3648286  |
| CR_01510C_A | -18.6495 | 0.000489 | 3640104  |
| C4_04520W_A | -18.9329 | 2.69E-17 | 3641110  |
| FLU1        | -19.0948 | 7.26E-12 | 3637048  |
| CR_06140W_A | -19.1156 | 3.93E-24 | 3644862  |
| C3_01430W_A | -19.4882 | 3.29E-08 | 3636633  |
| ZCF1        | -20.4925 | 4.58E-23 | 3638329  |
| FYV5        | -20.9015 | 6.19E-08 | 3647057  |
| C4_07140W_A | -20.954  | 7.99E-22 | 3642936  |
| C3_07570C_A | -21.6621 | 3.14E-12 | 3638522  |
| FMP45       | -21.7141 | 1.04E-20 | 3637004  |
| CTA4        | -22.2396 | 1.09E-27 | 3641743  |
| PIR1        | -22.4731 | 6.17E-37 | 3645801  |
| C1_07790C_A | -22.4804 | 8.34E-10 | 3640706  |
| C1_12630C_A | -23.4626 | 1.59E-08 | 3646838  |
| C4_03340C_A | -23.7237 | 5.23E-09 | 3648090  |
| C1_06350W_A | -23.7774 | 6.14E-25 | 3639562  |
| HSP70       | -24.0175 | 1.09E-26 | 3636229  |
| CDA2        | -24.6951 | 1.31E-06 | 3639716  |
| SSU1        | -25.2395 | 1.5E-22  | 3641882  |
| CR_04710W_A | -25.3395 | 0.000192 | 3648141  |
| C7_01430C_A | -26.4732 | 1.96E-26 | 3636961  |
| C6_02660C_A | -26.9956 | 3.19E-07 | 3639224  |
| C4_06200W_A | -27.5739 | 5.98E-05 | 30515282 |
| C6_03440W_A | -27.7338 | 5.51E-15 | 3640274  |
| FRE9        | -28.5652 | 3.76E-16 | 3643452  |
| EBP1        | -28.9544 | 1.52E-15 | 3644060  |
| C3_03460C_A | -29.0745 | 1.77E-10 | 3638359  |
| CR_07680C_A | -29.4791 | 1.99E-06 | 3648193  |
| KTI11       | -29.8022 | 5.55E-05 | 30515125 |
| C3_04510W_A | -30.674  | 7.59E-09 | 3635258  |
| C6_01400W_A | -30.7185 | 0.001737 | 3641604  |
| CDR4        | -31.22   | 8.9E-29  | 3640711  |
| BMT1        | -31.449  | 2.36E-30 | 3638535  |
| C1_13820C_A | -31.7359 | 6.29E-19 | 3636127  |
| UGA6        | -32.0386 | 1.59E-05 | 3642975  |
| MET1        | -33.8376 | 2.59E-29 | 3643014  |
| CR_04940W_A | -34.7971 | 5.19E-10 | 3648209  |
| C1_02690C_A | -34.8789 | 0.001183 | 3636823  |
| C6_03810W_A | -34.975  | 1.13E-16 | 3640286  |
| C2_05330C_A | -35.0731 | 2.25E-19 | 3643426  |
| C2_06520C_A | -35.1019 | 1.02E-08 | 3646571  |
| KSP1        | -35.2907 | 1.68E-36 | 3644467  |
| C1_11410C_A | -36.5033 | 5.92E-06 | 30515054 |
| C7_00880C_A | -36.6241 | 2.45E-21 | 3638052  |
| C7_01680C_A | -36.6511 | 1.89E-27 | 3636981  |
| C2_08260W_A | -38.5441 | 2.05E-08 | 3642345  |

| CR_09930W_A           | -39.0202    | 1.63E-26 | 3639029  |
|-----------------------|-------------|----------|----------|
| HSP31                 | -39.4583    | 2.28E-10 | 3644589  |
| C2_07070W_A           | -46.5243    | 4.75E-25 | 3643501  |
| MRV4                  | -47.436     | 0.000205 | 3636547  |
| C2_06530W_A           | -49.6829    | 1.6E-11  | 3646572  |
| HWP2                  | -51.4561    | 0.000402 | 3646803  |
| GIT3                  | -54.541     | 1.84E-31 | 3642634  |
| CR_01530C_A           | -54.9045    | 1.06E-13 | 3640072  |
| AAH1                  | -61.0514    | 3.16E-07 | 3643529  |
| MNN1                  | -66.1914    | 2.93E-18 | 3637784  |
| C5_04030W_A           | -66.319     | 1.66E-34 | 3647737  |
| C1_00190C_A           | -72.2399    | 3.06E-30 | 3639337  |
| ARG11                 | -72.5079    | 1.68E-05 | 3635193  |
| C5_03080C_A           | -74.7483    | 7.85E-27 | 3637701  |
| C7_03560W_A           | -94.0681    | 6.42E-59 | 3646236  |
| C7_00770W_A           | -95.485     | 2.6E-21  | 3637959  |
| CR_08880C_A           | -105.999    | 1.28E-21 | 3641878  |
| YWP1                  | -116.625    | 7.01E-64 | 3643915  |
| RME1                  | -128.461    | 6.53E-38 | 3644453  |
| C2_02130C_A           | -141.486    | 2.08E-10 | 3635747  |
| PHO87                 | -143.656    | 1.83E-10 | 3639861  |
| C4_06910W_A           | -155.421    | 9.66E-17 | 3642933  |
| GPI1                  | -190.254    | 1.44E-24 | 3643680  |
| C3_07930C_A           | -214.938    | 0.047674 | 3647452  |
| PRX1                  | -216.818    | 5.06E-36 | 3641357  |
| CR_00840C_A           | -238.693    | 0.039689 | 3640411  |
| C1_06430C_A           | -271.108    | 0.03515  | 3639553  |
| CRZ2                  | -365.892    | 4.02E-64 | 3645725  |
| HAK1                  | -498.421    | 0.018606 | 3639546  |
| C3_06170C_A           | -660.771    | 0.013838 | 3642272  |
| HSP30                 | -700.86     | 5.58E-67 | 3645419  |
| C3_00230C_A           | -725.629    | 0.012196 | 3640557  |
| CFL4                  | -1179.89    | 0.00714  | 3642639  |
| C4_07260W_A           | -1602.41    | 0.004992 | 3642942  |
| C1_14630C_A           | -23569.9    | 0.000133 | 3643291  |
| TAR1                  | -152062     | 6.1E-241 | 30515449 |
| <b>S45 vs Control</b> |             |          |          |
| Name                  | Fold change | P-value  | GeneID   |
| ECE1                  | 29315.18    | 1.5E-09  | 3646814  |
| HWP1                  | 7729.863    | 8.39E-23 | 3645372  |
| C1_04180W_A           | 4137.347    | 1.02E-06 | 3644716  |
| HGT12                 | 2603.884    | 3.99E-06 | 3638048  |
| C1_13100W_A           | 1904.235    | 1.03E-05 | 30515073 |
| HHT21                 | 1507.709    | 7.39E-16 | 3644707  |
| ECM331                | 1163.648    | 3.47E-05 | 3637731  |
| SAP5                  | 793.1459    | 8.23E-05 | 3639268  |



|             |          |          |          |
|-------------|----------|----------|----------|
| CDC11       | 777.0125 | 8.43E-05 | 3647888  |
| MAL31       | 538.1231 | 1.03E-11 | 3636420  |
| HYR1        | 502.9258 | 1.62E-11 | 3636226  |
| CRH11       | 426.1513 | 6.49E-11 | 3637905  |
| HHT2        | 346.5971 | 1.91E-24 | 3647326  |
| HTA2        | 322.3881 | 6.12E-24 | 3644715  |
| CDC10       | 285.3759 | 5.24E-10 | 3640947  |
| ALS3        | 255.8446 | 9.16E-71 | 3647965  |
| MLC1        | 250.4467 | 0.001065 | 30515387 |
| TUB2        | 243.9226 | 1.16E-17 | 3639329  |
| ALI1        | 243.5633 | 0.00117  | 3636635  |
| CR_06380C_A | 240.8575 | 0.001218 | 3648139  |
| RBT1        | 216.6491 | 3.27E-17 | 3645377  |
| PGA6        | 208.5507 | 3.75E-09 | 3634774  |
| FGR6-10     | 206.518  | 0.001623 | 3641770  |
| C5_02780W_A | 200.0764 | 0.001795 | 3637803  |
| COG4        | 197.8325 | 0.001804 | 3645571  |
| C4_05390W_A | 196.4817 | 0.001831 | 3646951  |
| SAM51       | 192.3798 | 0.001917 | 3641582  |
| C6_02140W_A | 191.7853 | 0.001924 | 3645886  |
| C6_00400C_A | 191.1845 | 0.001937 | 3646087  |
| C1_06250W_A | 190.3626 | 0.002052 | 3647525  |
| C4_02600C_A | 184.8314 | 0.002163 | 3637912  |
| HHO1        | 175.9418 | 8.37E-16 | 30515358 |
| C5_03000C_A | 175.8943 | 0.002254 | 3637818  |
| C1_07490C_A | 171.5018 | 0.002605 | 3646666  |
| SHE3        | 170.2838 | 7.79E-09 | 3639277  |
| VMA10       | 163.7544 | 0.002562 | 3645215  |
| SOD5        | 156.4144 | 8.59E-38 | 3638886  |
| TUB4        | 155.7778 | 0.002767 | 3641774  |
| UME6        | 146.1291 | 2.77E-08 | 3647522  |
| DPM2        | 144.044  | 0.003329 | 30515325 |
| KAR3        | 138.6747 | 0.003613 | 3644078  |
| TUB1        | 136.4792 | 2.89E-24 | 3641930  |
| CCN1        | 136.4378 | 0.003917 | 3643735  |
| MCD1        | 134.1259 | 0.004238 | 3639044  |
| TNA1        | 133.8215 | 0.005584 | 3637827  |
| C3_02620C_A | 126.4466 | 0.004323 | 3638326  |
| C3_06670C_A | 122.1558 | 0.00447  | 3642254  |
| C7_01100C_A | 121.0943 | 0.004605 | 3637948  |
| CR_05310W_A | 120.358  | 0.004579 | 3648125  |
| HHF1        | 117.3514 | 1.46E-27 | 3644705  |
| SAP6        | 113.172  | 1.44E-07 | 3639229  |
| C2_05510C_A | 108.999  | 0.00588  | 3643420  |
| DPM1        | 104.3424 | 1.45E-07 | 3640700  |
| MCD4        | 103.2656 | 0.006164 | 3642036  |
| POL30       | 102.9885 | 3.33E-07 | 3635583  |

|             |          |          |          |
|-------------|----------|----------|----------|
| PRI2        | 100.9091 | 0.006508 | 3642788  |
| CDC28       | 97.24045 | 2.41E-07 | 3644838  |
| C3_07840C_A | 94.05979 | 0.007357 | 3647465  |
| C1_03150C_A | 93.04448 | 0.0078   | 30514976 |
| C6_00710W_A | 92.88784 | 0.007556 | 3647073  |
| C1_02100W_A | 92.83823 | 0.007541 | 3644578  |
| C5_03430W_A | 90.66547 | 0.008296 | 3646346  |
| FGR6-3      | 89.83755 | 0.007868 | 3647954  |
| DUR3        | 89.68482 | 0.01174  | 3644760  |
| ERG28       | 88.00192 | 0.008161 | 3638833  |
| HRT2        | 86.31746 | 6.61E-07 | 3635709  |
| C4_02460W_A | 84.09652 | 0.009719 | 3637844  |
| PHR1        | 82.91186 | 3.16E-39 | 3641108  |
| CR_00280C_A | 82.62809 | 0.00914  | 3639719  |
| TEM1        | 81.90066 | 0.009056 | 3636923  |
| PGA31       | 79.07791 | 0.010577 | 3641226  |
| C2_01420C_A | 79.00154 | 0.010098 | 3635841  |
| TOS1        | 78.26475 | 3.49E-36 | 3636566  |
| CR_10130W_A | 78.23551 | 0.009803 | 3638970  |
| C7_00240W_A | 77.69146 | 0.010083 | 3637980  |
| ERG11       | 77.112   | 2.73E-15 | 3641571  |
| GUP1        | 77.01222 | 0.010111 | 3636171  |
| C6_02180W_A | 75.18013 | 0.010565 | 3645861  |
| CR_06500C_A | 75.1384  | 0.010682 | 3645274  |
| HTA1        | 74.68119 | 1.35E-21 | 3645658  |
| OGG1        | 72.30463 | 0.01196  | 3643106  |
| C3_06750W_A | 70.90707 | 0.011655 | 30515219 |
| RFA2        | 70.87946 | 1.88E-06 | 3643506  |
| C1_11940C_A | 70.33293 | 0.011926 | 3642046  |
| C1_03940W_A | 69.67496 | 1.42E-09 | 3646415  |
| LSC1        | 67.57347 | 2.08E-17 | 3640199  |
| HHF22       | 67.06224 | 2.8E-22  | 3647327  |
| ASK1        | 66.79357 | 2.11E-06 | 3635656  |
| CFL11       | 65.01147 | 3.4E-09  | 3646622  |
| C3_07540C_A | 64.8939  | 0.014002 | 3638526  |
| DDR48       | 64.14773 | 2.58E-18 | 3644061  |
| ILV5        | 63.22592 | 2.01E-15 | 3644012  |
| C1_11950W_A | 62.97176 | 0.014543 | 3642045  |
| CR_04490C_A | 62.97145 | 0.0146   | 3641013  |
| C1_05100W_A | 61.14181 | 0.01545  | 3647669  |
| ARF3        | 60.85342 | 4.26E-06 | 3636628  |
| CDC21       | 58.98914 | 6.67E-06 | 3643463  |
| C1_07920W_A | 58.73351 | 0.016342 | 30515026 |
| RBT4        | 58.07789 | 6.71E-17 | 3639534  |
| C1_10560C_A | 58.02794 | 0.016869 | 3647196  |
| YNK1        | 57.52674 | 5.27E-17 | 3637746  |
| C2_10010C_A | 57.43769 | 0.017066 | 3643962  |

|             |          |          |          |
|-------------|----------|----------|----------|
| ERG6        | 55.68096 | 1.31E-14 | 3636655  |
| C6_00660C_A | 55.65729 | 0.017444 | 3647133  |
| C4_03170W_A | 55.14304 | 0.018251 | 3637840  |
| CR_04650W_A | 55.03585 | 0.017507 | 30515396 |
| FAD1        | 55.03342 | 0.0176   | 3634930  |
| C6_01880W_A | 54.43699 | 0.01798  | 3641599  |
| C4_04380C_A | 54.0059  | 9.6E-06  | 30515266 |
| C1_03600W_A | 53.36001 | 1.01E-05 | 3636880  |
| CR_09810W_A | 53.24581 | 0.018957 | 3638985  |
| HOM6        | 52.95858 | 1.54E-05 | 3636815  |
| OST1        | 52.8184  | 1.11E-05 | 3643657  |
| CWH43       | 52.81063 | 9.47E-11 | 3640389  |
| LEU2        | 52.44588 | 1.48E-07 | 3638034  |
| ASF1        | 52.08034 | 0.020309 | 3647348  |
| SMC1        | 51.5213  | 2.03E-08 | 3643221  |
| C1_06050C_A | 51.22037 | 1.04E-05 | 30515003 |
| C4_07080C_A | 50.79141 | 1.77E-08 | 3642905  |
| C2_09590C_A | 50.23069 | 0.021433 | 3643800  |
| C1_05190C_A | 48.96972 | 0.022059 | 30514991 |
| MLH1        | 48.41831 | 0.023132 | 3645758  |
| IHD1        | 48.19392 | 8.53E-32 | 3640291  |
| ASH2        | 47.87579 | 1.65E-05 | 3636445  |
| EXG2        | 47.87218 | 2.71E-10 | 3636816  |
| RAD54       | 47.85351 | 1.63E-05 | 3636192  |
| ATP18       | 47.72265 | 1.7E-05  | 30515084 |
| ACP12       | 46.72758 | 1.83E-05 | 3637361  |
| DUR1,2      | 46.56742 | 1.66E-09 | 3644771  |
| C1_05740C_A | 46.53731 | 0.023795 | 3639893  |
| CYT1        | 46.53147 | 1.35E-16 | 3643441  |
| C4_00920C_A | 46.46964 | 0.023617 | 3635678  |
| DOG1        | 46.08286 | 1.86E-05 | 3641597  |
| ATP19       | 44.96282 | 2.07E-05 | 30515061 |
| C3_06640W_A | 44.77795 | 0.026436 | 3642251  |
| AGM1        | 44.63777 | 2.21E-05 | 3636138  |
| SNZ1        | 43.78853 | 1.48E-10 | 3636803  |
| ATO1        | 43.74432 | 1.11E-14 | 3647761  |
| MAL2        | 43.42038 | 8.23E-17 | 3638946  |
| C6_02190C_A | 43.34777 | 3.24E-08 | 3645862  |
| RNR1        | 43.06115 | 1.44E-16 | 3642989  |
| SWI6        | 42.96484 | 2.76E-05 | 3634932  |
| C5_04310W_A | 42.95053 | 0.02868  | 3636477  |
| CR_03340C_A | 42.90692 | 0.027681 | 3645144  |
| C2_06280C_A | 42.82447 | 0.026702 | 3646923  |
| PMI1        | 42.49608 | 5.13E-08 | 3643795  |
| CR_09520C_A | 42.05568 | 4.87E-08 | 3647103  |
| POL1        | 42.05406 | 1.28E-13 | 3635144  |
| CR_06170W_A | 41.90815 | 2.66E-05 | 3644865  |

|             |          |          |          |
|-------------|----------|----------|----------|
| MCM2        | 41.83226 | 4.62E-05 | 3643197  |
| PLB5        | 41.69451 | 1.97E-16 | 3640750  |
| YOX1        | 41.66333 | 0.028556 | 3637952  |
| DAD3        | 40.99258 | 0.028403 | 3644864  |
| EMP24       | 40.57777 | 6.84E-08 | 3647247  |
| PCL2        | 40.51641 | 0.031915 | 3646501  |
| CR_03470W_A | 40.02793 | 5.85E-05 | 3643198  |
| C5_03930C_A | 39.96669 | 2.31E-10 | 3647447  |
| CLB4        | 39.8542  | 1.03E-07 | 3643102  |
| C1_13770C_A | 39.77311 | 0.029887 | 3636139  |
| C3_06730W_A | 39.77252 | 0.029707 | 3638504  |
| PGA34       | 39.77114 | 0.029788 | 3642579  |
| QCR2        | 39.11118 | 1.79E-16 | 3646352  |
| BIO2        | 38.86179 | 3.61E-05 | 3640106  |
| ERV46       | 38.43999 | 2.51E-07 | 3644129  |
| ATP1        | 37.93715 | 1.64E-31 | 3646134  |
| C6_00120W_A | 37.38754 | 0.033436 | 30515323 |
| C2_09960W_A | 36.71955 | 0.033426 | 3643821  |
| COX5        | 36.23156 | 3.97E-18 | 3634768  |
| ARC18       | 36.09836 | 0.034639 | 3644056  |
| C7_01750W_A | 36.04727 | 0.03564  | 3637009  |
| THR1        | 35.79982 | 7.47E-05 | 3641572  |
| ERV25       | 35.3911  | 7.68E-11 | 3642243  |
| C2_09100C_A | 34.87668 | 1.54E-12 | 3644113  |
| C3_02530W_A | 34.84068 | 0.037115 | 30515189 |
| C2_07540W_A | 34.0487  | 8.8E-05  | 3645222  |
| CTF8        | 33.71813 | 0.038945 | 3644120  |
| ERP5        | 33.69495 | 2.63E-11 | 30515046 |
| C7_01830W_A | 33.6673  | 0.038005 | 3637053  |
| C4_01140C_A | 33.64424 | 0.038511 | 3635657  |
| ECM33       | 33.63331 | 3.84E-26 | 30514977 |
| GIN4        | 33.51628 | 9.01E-12 | 3644543  |
| MSH6        | 33.27159 | 2.86E-11 | 3636161  |
| CYB5        | 32.88056 | 4E-07    | 3637965  |
| MPS1        | 32.76532 | 9.73E-05 | 3641888  |
| CR_01920W_A | 32.47204 | 0.040932 | 3640096  |
| C3_02330C_A | 32.44509 | 0.040394 | 3636550  |
| PGA54       | 32.22657 | 1.42E-17 | 3637929  |
| SSR1        | 31.9413  | 5.87E-16 | 3638055  |
| DDC1        | 31.83592 | 0.041719 | 3638374  |
| C3_07130W_A | 31.83465 | 0.041467 | 3638440  |
| PGA30       | 31.80823 | 9.79E-05 | 3641227  |
| C7_03650W_A | 31.22095 | 0.042922 | 3646224  |
| SEC21       | 31.05252 | 7.96E-17 | 3644786  |
| C2_05720C_A | 30.9505  | 3.98E-09 | 3645574  |
| PMM1        | 30.62489 | 6.35E-11 | 3636852  |
| C2_02330W_A | 30.01136 | 0.045694 | 3635811  |

|             |          |          |          |
|-------------|----------|----------|----------|
| C2_06270W_A | 30.00331 | 0.045235 | 3646921  |
| C3_07050W_A | 30.00331 | 0.04524  | 3638515  |
| C3_06400C_A | 29.9838  | 1.83E-06 | 3642260  |
| CR_05360C_A | 29.95392 | 0.000147 | 3648033  |
| BGL2        | 29.91075 | 4.91E-19 | 3635691  |
| DPP3        | 29.87257 | 3.27E-10 | 3636942  |
| CDC12       | 29.47292 | 1.75E-17 | 3636809  |
| LYS9        | 29.45917 | 3.6E-10  | 3642279  |
| CR_01910C_A | 29.40683 | 0.046779 | 3640095  |
| MET15       | 29.25746 | 2.2E-11  | 3645031  |
| GDH3        | 29.25284 | 3.17E-15 | 3648086  |
| PDI1        | 29.20049 | 6.42E-16 | 3641367  |
| C3_02140C_A | 28.8754  | 3.06E-08 | 3636656  |
| KIP1        | 28.85637 | 1.86E-06 | 3645261  |
| ERG26       | 28.76954 | 1.12E-08 | 3642803  |
| QCR8        | 28.73812 | 3.08E-12 | 30515112 |
| RGD1        | 28.67865 | 9.8E-09  | 3639868  |
| EXO1        | 28.42577 | 2.35E-08 | 3641583  |
| NHP6A       | 28.21404 | 8.65E-17 | 30515244 |
| MSB1        | 27.84982 | 1.44E-11 | 3648218  |
| HGT1        | 27.65126 | 1.32E-28 | 3645420  |
| SEP7        | 27.54051 | 2E-10    | 3644596  |
| CHO1        | 27.31946 | 8.3E-10  | 3644557  |
| RFX2        | 27.19143 | 3.43E-10 | 3635658  |
| C1_07260C_A | 26.66639 | 0.000242 | 3644456  |
| CDC46       | 26.62083 | 3.72E-08 | 3646912  |
| CR_10440W_A | 26.58146 | 0.000395 | 3638976  |
| CSM3        | 26.47636 | 0.000469 | 3644083  |
| CHT2        | 26.4269  | 3.9E-16  | 3636523  |
| C1_04430C_A | 26.3435  | 0.000259 | 30514986 |
| LYS4        | 26.33979 | 2.2E-09  | 3641180  |
| C4_00390W_A | 26.18624 | 3.5E-06  | 3645016  |
| SEC22       | 26.02242 | 0.000282 | 30515391 |
| CR_05500C_A | 25.86382 | 0.000302 | 3647598  |
| PMT2        | 25.70476 | 2.42E-17 | 3638538  |
| HSL1        | 25.46807 | 4.04E-14 | 3637810  |
| RFC5        | 25.23116 | 0.000339 | 3638890  |
| FAV2        | 24.89808 | 0.000347 | 3647236  |
| C2_07650C_A | 24.86526 | 3.14E-06 | 3642342  |
| C7_00230W_A | 24.85017 | 8.59E-10 | 3637982  |
| SEF2        | 24.70415 | 9.46E-06 | 3647052  |
| C2_05290C_A | 24.5908  | 9.27E-08 | 3643472  |
| SOL3        | 24.46463 | 9.1E-08  | 3646625  |
| LEU4        | 24.39207 | 5.98E-05 | 3639339  |
| C1_06700W_A | 24.35459 | 0.000393 | 3639511  |
| CR_10530W_A | 24.25361 | 0.000414 | 3639042  |
| ATP3        | 24.2293  | 1.5E-16  | 3640387  |

|             |          |          |          |
|-------------|----------|----------|----------|
| NUO1        | 24.08627 | 3.05E-11 | 3647100  |
| RAD53       | 23.88633 | 8.99E-06 | 3645633  |
| DUT1        | 23.88524 | 2.51E-07 | 3640188  |
| C1_06920C_A | 23.88409 | 0.0005   | 3639525  |
| FRP2        | 23.75479 | 1.28E-09 | 3638008  |
| C7_01500W_A | 23.72935 | 1.72E-07 | 3637050  |
| CR_03000C_A | 23.70327 | 0.000535 | 3642597  |
| PTP3        | 23.58286 | 1.78E-17 | 3638940  |
| TSA1        | 23.55373 | 4E-17    | 3642269  |
| C1_01080W_A | 23.45624 | 0.000417 | 3640173  |
| C6_00770C_A | 23.45467 | 0.000417 | 3647079  |
| SEC23       | 23.40097 | 2.51E-14 | 3641818  |
| RFA1        | 23.3715  | 1.98E-16 | 3638823  |
| ERV29       | 23.292   | 1.05E-10 | 3635672  |
| SUN41       | 23.23796 | 1.89E-22 | 3647067  |
| HGT3        | 23.13468 | 0.000434 | 3643185  |
| C1_00700W_A | 23.13306 | 0.000446 | 3639330  |
| GIN1        | 23.11585 | 2.06E-08 | 3644539  |
| SMC2        | 23.00026 | 2.82E-09 | 3643918  |
| ACO2        | 22.98607 | 2.74E-07 | 3646708  |
| CR_01490C_A | 22.84207 | 1.76E-07 | 30515376 |
| NRM1        | 22.72196 | 8.82E-06 | 3639343  |
| LSP1        | 22.49008 | 1.49E-21 | 3648025  |
| LYS12       | 22.26815 | 1.01E-14 | 3640134  |
| IDP1        | 22.11493 | 1.2E-07  | 3647474  |
| LAG1        | 22.1057  | 2.86E-10 | 3640383  |
| C5_02380W_A | 21.9994  | 1.41E-21 | 3637794  |
| SRB1        | 21.8286  | 6.36E-21 | 3647454  |
| C1_06630W_A | 21.82077 | 3.56E-08 | 3639544  |
| C5_02920W_A | 21.68818 | 0.000486 | 3637751  |
| ACO1        | 21.43046 | 1.18E-24 | 3642090  |
| CR_09560C_A | 21.36781 | 0.000563 | 3647099  |
| ERG2        | 21.21327 | 0.000628 | 3639347  |
| C1_09020W_A | 21.08988 | 2.78E-10 | 3634917  |
| C1_04200C_A | 21.08976 | 2.76E-07 | 3644718  |
| CBR1        | 20.9676  | 2.95E-10 | 3646961  |
| C1_02760W_A | 20.96218 | 1.22E-08 | 3636870  |
| C1_05180C_A | 20.88631 | 0.000604 | 30514990 |
| CR_00990W_A | 20.73603 | 0.000695 | 3640425  |
| TSA1B       | 20.72221 | 1.07E-15 | 30515214 |
| C6_04100W_A | 20.62248 | 7.36E-12 | 3647836  |
| CMP1        | 20.40285 | 3.3E-10  | 3639328  |
| C2_09050C_A | 20.34753 | 7.44E-09 | 3645791  |
| HTA3        | 20.29826 | 7.07E-09 | 3638322  |
| YVC1        | 20.21166 | 4.58E-16 | 3642303  |
| HTB1        | 20.16557 | 5.89E-18 | 3645659  |
| SEC13       | 20.0919  | 2.42E-12 | 3638425  |

|             |          |          |          |
|-------------|----------|----------|----------|
| C5_03120W_A | 20.08397 | 0.00073  | 3637705  |
| MCM6        | 19.99885 | 1.08E-06 | 3640142  |
| C5_01230C_A | 19.97232 | 1.94E-11 | 3642618  |
| C2_02050C_A | 19.854   | 3.18E-05 | 3635851  |
| KTR4        | 19.76343 | 0.000816 | 3646425  |
| SAC1        | 19.71142 | 3.64E-08 | 3634864  |
| SOU1        | 19.70479 | 6.45E-05 | 3642799  |
| CR_09330C_A | 19.68565 | 1.89E-11 | 3641899  |
| C2_07550W_A | 19.6692  | 4.49E-12 | 3645221  |
| ACT1        | 19.65227 | 2.04E-23 | 3636195  |
| HAT1        | 19.58462 | 3.3E-05  | 3644770  |
| LSC2        | 19.53577 | 7.53E-15 | 3646618  |
| C6_03130W_A | 19.31865 | 1.43E-06 | 30515341 |
| OSH3        | 19.23652 | 6.96E-12 | 3645368  |
| ERG13       | 18.98615 | 2.22E-11 | 3641881  |
| EAF6        | 18.96175 | 0.000935 | 3646494  |
| COF1        | 18.95099 | 2.49E-16 | 30515293 |
| C1_04010C_A | 18.759   | 0.001243 | 3646426  |
| CR_00910W_A | 18.73063 | 2.66E-16 | 30515371 |
| CPH1        | 18.66348 | 2.33E-09 | 3644468  |
| C5_05350W_A | 18.61166 | 3.39E-07 | 3636401  |
| C4_00710W_A | 18.6026  | 3.03E-05 | 3645750  |
| CR_03520C_A | 18.569   | 8.85E-11 | 3643203  |
| CAR1        | 18.55656 | 1.27E-14 | 3636503  |
| DPB4        | 18.42687 | 1.89E-06 | 3638818  |
| C1_12650C_A | 18.3201  | 0.001098 | 3646836  |
| GPX2        | 18.30155 | 5.87E-15 | 3644009  |
| C1_09670C_A | 18.29312 | 0.001512 | 3634872  |
| ATP2        | 18.19427 | 6.51E-23 | 3645039  |
| SMC3        | 17.96606 | 6.37E-05 | 3638408  |
| RET2        | 17.93477 | 6.68E-12 | 3637714  |
| CR_05800C_A | 17.83971 | 0.001343 | 3646706  |
| C3_01020W_A | 17.82629 | 3.54E-05 | 3639828  |
| SGA1        | 17.79842 | 5.21E-08 | 3636652  |
| CEX1        | 17.7175  | 1.28E-06 | 3644913  |
| SAS2        | 17.58753 | 4.29E-05 | 3638817  |
| C2_06610C_A | 17.51604 | 0.001372 | 30515140 |
| RIP1        | 17.50453 | 7.91E-15 | 3635204  |
| C2_02410W_A | 17.46369 | 9.73E-12 | 3635755  |
| C5_00080C_A | 17.45908 | 2.59E-12 | 3647886  |
| C7_01710W_A | 17.35782 | 2.72E-12 | 3637012  |
| C3_06630W_A | 17.30756 | 0.001832 | 3642250  |
| TOP2        | 17.29819 | 6.24E-11 | 3642777  |
| C5_05020C_A | 17.02455 | 2E-07    | 3636486  |
| PHO15       | 17.02231 | 6.28E-09 | 3644459  |
| C2_00590W_A | 17.01329 | 3.87E-05 | 3638851  |
| VMA2        | 17.00417 | 1.17E-14 | 3646710  |

|             |          |          |          |
|-------------|----------|----------|----------|
| SAR1        | 16.90377 | 2.17E-11 | 3645865  |
| C1_02500W_A | 16.87482 | 0.001544 | 3636795  |
| PGA63       | 16.87136 | 5.63E-14 | 3639524  |
| INO1        | 16.86929 | 1.54E-20 | 3638966  |
| BUB1        | 16.80916 | 2.25E-12 | 3637922  |
| C4_00910C_A | 16.80728 | 1.85E-06 | 3635679  |
| MYO2        | 16.74508 | 4.49E-17 | 3636140  |
| PST1        | 16.67969 | 2.83E-15 | 3643520  |
| C1_09980C_A | 16.55306 | 4.66E-05 | 3634863  |
| CAC2        | 16.27422 | 5.56E-05 | 3646978  |
| C2_10200W_A | 16.24407 | 0.002254 | 3643928  |
| TAL1        | 16.23944 | 6.65E-14 | 3643225  |
| SDH12       | 16.20524 | 1.66E-14 | 3642775  |
| AXL2        | 16.0768  | 8.26E-16 | 3641184  |
| ASM3        | 15.94185 | 0.00015  | 3639332  |
| QCR7        | 15.92142 | 5.88E-12 | 3639233  |
| C1_01190C_A | 15.90397 | 6.46E-05 | 3640207  |
| MDH1-1      | 15.85153 | 5.65E-14 | 3635636  |
| C5_00340W_A | 15.83516 | 1.17E-09 | 3641555  |
| C1_04780C_A | 15.78576 | 3.65E-07 | 3644774  |
| APL4        | 15.64495 | 2.45E-11 | 3642565  |
| HET1        | 15.61459 | 1.31E-10 | 3647897  |
| LAT1        | 15.56992 | 1.27E-13 | 3636986  |
| C2_00180C_A | 15.55261 | 1.17E-05 | 3638905  |
| RIC1        | 15.51106 | 3.6E-06  | 3639331  |
| DOA1        | 15.42951 | 2.9E-12  | 3634871  |
| C4_06140C_A | 15.42945 | 0.002264 | 3642821  |
| DOT1        | 15.39927 | 6.91E-12 | 3642236  |
| CR_04760C_A | 15.38878 | 0.000112 | 3647303  |
| CRD2        | 15.32773 | 0.002829 | 30515234 |
| PMS1        | 15.1481  | 1.6E-05  | 3647714  |
| C1_07590C_A | 15.04893 | 7.64E-07 | 3646673  |
| CHS1        | 15.02031 | 1.25E-07 | 3641364  |
| ACS2        | 14.99519 | 2.08E-14 | 3644710  |
| NDH51       | 14.96621 | 1.93E-15 | 3645444  |
| HGT2        | 14.95727 | 1.71E-13 | 3644579  |
| CHL4        | 14.94789 | 0.002587 | 3646131  |
| C1_14320C_A | 14.92351 | 0.002981 | 3643316  |
| LYS22       | 14.87223 | 1.11E-05 | 3645466  |
| TOS4        | 14.82658 | 5E-13    | 3644548  |
| DPM3        | 14.79525 | 0.000129 | 30515245 |
| MNT1        | 14.79206 | 1.16E-13 | 3636585  |
| C1_06340W_A | 14.77245 | 1.86E-06 | 3639499  |
| NUC2        | 14.69274 | 5.48E-17 | 3637030  |
| UGA32       | 14.66614 | 1.05E-05 | 3639333  |
| C1_09060C_A | 14.62798 | 0.00253  | 3634772  |
| CR_05130C_A | 14.62763 | 0.002601 | 3646401  |



|             |          |          |          |
|-------------|----------|----------|----------|
| C4_02420C_A | 14.62707 | 0.002532 | 3637849  |
| SOD1        | 14.55625 | 1.29E-07 | 30515248 |
| C4_05250W_A | 14.54057 | 1.35E-05 | 3646158  |
| C4_00020W_A | 14.50586 | 1.64E-11 | 3648053  |
| CLC1        | 14.4229  | 7.22E-12 | 3635662  |
| C1_03720C_A | 14.40715 | 3.02E-11 | 3648216  |
| C3_01070C_A | 14.40665 | 0.002858 | 3639832  |
| PMT4        | 14.39752 | 1.89E-10 | 3644096  |
| SPC34       | 14.30582 | 0.002608 | 3641173  |
| C6_02990W_A | 14.28393 | 2.13E-05 | 3639193  |
| ESC4        | 14.21021 | 0.000261 | 3635727  |
| FRE30       | 14.19834 | 2.19E-08 | 3646025  |
| C2_01260W_A | 14.1489  | 0.000149 | 3638792  |
| YBL053      | 14.13379 | 2.07E-07 | 3647045  |
| CR_09050C_A | 14.0954  | 1.76E-05 | 3648197  |
| CR_09230C_A | 14.08335 | 1.98E-05 | 3641918  |
| C1_06270W_A | 14.06967 | 6.92E-08 | 3647523  |
| SEC12       | 14.06958 | 1.6E-11  | 3641639  |
| FRE7        | 14.05198 | 1.17E-09 | 3646024  |
| RAS1        | 14.03411 | 1.27E-13 | 3643927  |
| C1_12880C_A | 14.00144 | 4.71E-10 | 3636151  |
| C2_07140W_A | 13.97905 | 3.88E-09 | 3643508  |
| CDC54       | 13.92481 | 3.57E-05 | 3647606  |
| HGC1        | 13.87153 | 1.46E-11 | 3639349  |
| DUN1        | 13.86544 | 3.38E-05 | 3636494  |
| LEU1        | 13.8517  | 2.14E-11 | 3639685  |
| C2_07010W_A | 13.83162 | 1.21E-09 | 3643535  |
| CDC3        | 13.82946 | 6.17E-15 | 3644719  |
| PSF1        | 13.7552  | 0.004352 | 3645894  |
| C1_01210W_A | 13.75126 | 9.15E-07 | 3640209  |
| C2_03970W_A | 13.64569 | 0.003554 | 3637419  |
| C4_04980W_A | 13.64291 | 3.43E-05 | 3641167  |
| GND1        | 13.63795 | 5.98E-13 | 3636131  |
| CR_10140W_A | 13.56918 | 1.06E-13 | 3638972  |
| C5_02220C_A | 13.50501 | 0.003667 | 3637760  |
| C4_03290W_A | 13.5013  | 4.49E-12 | 3637887  |
| C3_05990C_A | 13.49578 | 1E-06    | 3641732  |
| SEC20       | 13.4085  | 0.000207 | 3639206  |
| ERG10       | 13.39054 | 2.65E-14 | 3648275  |
| ATP5        | 13.39016 | 4.02E-13 | 3640521  |
| C2_09040W_A | 13.33803 | 1.33E-07 | 3645792  |
| CR_00060C_A | 13.31415 | 3.79E-11 | 3639673  |
| GLT1        | 13.26749 | 2.77E-14 | 3639519  |
| C3_00520W_A | 13.13283 | 0.000236 | 3640513  |
| CR_03270W_A | 13.11363 | 2.08E-05 | 3645101  |
| ABG1        | 13.05452 | 2.86E-08 | 3647715  |
| MYO1        | 13.02629 | 3.47E-11 | 3647248  |

|             |          |          |          |
|-------------|----------|----------|----------|
| MMS21       | 12.99704 | 0.000376 | 3642265  |
| MIS11       | 12.98466 | 1.08E-16 | 3645732  |
| C1_08140W_A | 12.9784  | 0.000252 | 3640730  |
| C4_04800W_A | 12.97625 | 2.14E-13 | 3641113  |
| APL2        | 12.95386 | 2.27E-10 | 3638343  |
| C5_01590W_A | 12.93754 | 1.71E-06 | 3647041  |
| CUP5        | 12.92387 | 1.59E-12 | 3635174  |
| AAP1        | 12.92253 | 6.62E-05 | 3647397  |
| C5_05230C_A | 12.91024 | 1.86E-12 | 3636470  |
| C3_07230W_A | 12.89329 | 3.16E-11 | 3638531  |
| CR_09070C_A | 12.86376 | 1.74E-10 | 3641926  |
| AMO1        | 12.86027 | 0.000377 | 3642994  |
| DAP1        | 12.85555 | 2.15E-05 | 3641021  |
| C7_01460C_A | 12.85226 | 1.51E-05 | 3636958  |
| C7_00670C_A | 12.85183 | 5.66E-07 | 3638024  |
| C6_02100W_A | 12.8517  | 1.64E-06 | 3647554  |
| C4_04970C_A | 12.8517  | 1.46E-05 | 30515274 |
| TPM2        | 12.82853 | 1E-12    | 30515441 |
| PSF3        | 12.81792 | 0.006306 | 3637999  |
| SDH2        | 12.79819 | 1.53E-14 | 3646397  |
| C3_02820C_A | 12.7977  | 7.08E-11 | 3638419  |
| SNF5        | 12.78079 | 4.1E-08  | 3648297  |
| SMC5        | 12.76365 | 4.21E-06 | 3645103  |
| RAD52       | 12.75306 | 1.63E-06 | 3647148  |
| OPI3        | 12.70169 | 0.004826 | 3642277  |
| C5_03780C_A | 12.6352  | 0.000439 | 3647232  |
| USO5        | 12.59975 | 1.19E-06 | 3638398  |
| C4_01510W_A | 12.58796 | 6.69E-07 | 3635616  |
| PDR17       | 12.5771  | 0.000203 | 3643007  |
| CDC42       | 12.52475 | 3.45E-09 | 3646488  |
| C4_05790W_A | 12.52419 | 8.56E-08 | 3641784  |
| C3_00210C_A | 12.49539 | 0.00025  | 3640560  |
| C4_03400W_A | 12.48684 | 0.000213 | 30515256 |
| CTF5        | 12.39034 | 0.005366 | 3647550  |
| CR_08610W_A | 12.27604 | 9.79E-07 | 3642109  |
| C2_02310W_A | 12.25849 | 4.88E-09 | 3635809  |
| NUF2        | 12.2524  | 1.66E-06 | 3642613  |
| ERG24       | 12.18175 | 6.86E-07 | 3647716  |
| RHO1        | 12.17107 | 2.26E-14 | 3642564  |
| GVP36       | 12.15978 | 4.93E-07 | 3641772  |
| C5_01960C_A | 12.14389 | 8.22E-11 | 3643738  |
| C5_02210W_A | 12.11721 | 5.25E-07 | 3637759  |
| C4_04600C_A | 12.11592 | 0.000293 | 3641156  |
| C3_01610W_A | 12.10196 | 3.15E-14 | 3636664  |
| ACB1        | 12.06275 | 5.38E-08 | 30515350 |
| PPH3        | 11.99565 | 0.007026 | 3643193  |
| C1_14060W_A | 11.92407 | 1.38E-11 | 3643344  |

|             |          |          |          |
|-------------|----------|----------|----------|
| IPP1        | 11.9123  | 1.94E-12 | 3643874  |
| C3_06410C_A | 11.87904 | 2.75E-05 | 3642261  |
| ARP3        | 11.85045 | 1.61E-10 | 3643479  |
| APE3        | 11.84251 | 3.71E-05 | 3643875  |
| MEP1        | 11.82906 | 3.76E-08 | 3636553  |
| INP51       | 11.80147 | 3.57E-06 | 3643806  |
| FGR41       | 11.74337 | 0.00604  | 3634839  |
| CR_03330W_A | 11.7392  | 0.005776 | 3645095  |
| PDX1        | 11.69623 | 1.86E-12 | 3636128  |
| DPP2        | 11.66602 | 0.000374 | 3645341  |
| PMT1        | 11.62497 | 7.25E-15 | 3641393  |
| CDC19       | 11.58974 | 8.53E-13 | 3643438  |
| SKN1        | 11.55545 | 3.78E-14 | 3641755  |
| ATP17       | 11.54937 | 2.71E-11 | 30515364 |
| C2_09180W_A | 11.52186 | 0.008806 | 3644092  |
| CIT1        | 11.48824 | 2.61E-11 | 3643201  |
| PDS5        | 11.47594 | 3.52E-10 | 3642341  |
| CR_09570W_A | 11.47445 | 5.13E-05 | 3647098  |
| SPC3        | 11.44871 | 5.36E-06 | 3636121  |
| LYS1        | 11.44244 | 1.9E-09  | 6335429  |
| MRP8        | 11.42881 | 6.08E-07 | 3641178  |
| C2_06770W_A | 11.40082 | 0.007064 | 3643515  |
| BMH1        | 11.39212 | 5.04E-14 | 3636810  |
| C4_03860C_A | 11.37845 | 0.000456 | 3647854  |
| ALD5        | 11.36115 | 3.02E-17 | 3643026  |
| SSH1        | 11.29456 | 2.14E-07 | 3642504  |
| C1_02370C_A | 11.21687 | 1.08E-06 | 3644576  |
| GFA1        | 11.1958  | 4.15E-10 | 3636557  |
| CR_05760C_A | 11.19183 | 0.000457 | 3646695  |
| RFC2        | 11.16558 | 4.58E-05 | 3637939  |
| IDP2        | 11.13737 | 2.02E-15 | 3644934  |
| VMA11       | 11.12178 | 1.6E-05  | 3637054  |
| C2_02260W_A | 11.10367 | 2.07E-07 | 3635778  |
| ZWF1        | 11.09911 | 2.65E-12 | 3634913  |
| ADK1        | 11.0705  | 1.05E-10 | 3644533  |
| ESP1        | 11.06861 | 2.24E-06 | 3640197  |
| C5_05200C_A | 11.06258 | 2.92E-06 | 3636467  |
| C4_02930W_A | 10.91601 | 0.000501 | 3637876  |
| ALG8        | 10.91491 | 0.000484 | 3636562  |
| C3_05880C_A | 10.91274 | 2E-11    | 3641737  |
| CR_01070W_A | 10.8225  | 0.000514 | 3640382  |
| VMA8        | 10.81622 | 5.59E-09 | 3642798  |
| IFA4        | 10.80731 | 0.000591 | 3645454  |
| C5_03950W_A | 10.78285 | 1.31E-06 | 3647445  |
| OPT6        | 10.7027  | 8.46E-09 | 3635603  |
| TVP18       | 10.64689 | 8.61E-05 | 3634844  |
| CR_03950W_A | 10.63929 | 0.009191 | 3640960  |

|             |          |          |          |
|-------------|----------|----------|----------|
| CR_04770C_A | 10.62686 | 0.009498 | 3647302  |
| CR_04860C_A | 10.61554 | 0.008629 | 3647294  |
| MNS1        | 10.60795 | 4.41E-09 | 3644692  |
| C6_04120C_A | 10.60531 | 5.41E-09 | 3647974  |
| GRP1        | 10.57122 | 0.000719 | 3634899  |
| CDC7        | 10.5611  | 1.08E-06 | 3643424  |
| C1_01800W_A | 10.54643 | 0.000643 | 3645407  |
| CBP1        | 10.46229 | 4.51E-16 | 3641920  |
| C2_08890W_A | 10.4572  | 0.017705 | 3645799  |
| RAD51       | 10.45518 | 2.53E-10 | 3644944  |
| C5_04950C_A | 10.45192 | 1.38E-06 | 3636422  |
| KGD2        | 10.43834 | 3.64E-11 | 3646036  |
| CR_06070W_A | 10.39917 | 2.57E-08 | 3644840  |
| DPB2        | 10.36874 | 0.000235 | 3639026  |
| C3_04080W_A | 10.36754 | 1.13E-14 | 30515200 |
| PDB1        | 10.32824 | 1.96E-10 | 3641186  |
| VMA5        | 10.29484 | 2.88E-08 | 3642316  |
| C3_07880C_A | 10.29407 | 0.009288 | 3647470  |
| SUC1        | 10.28629 | 4.47E-10 | 3641916  |
| C6_02330W_A | 10.28081 | 4.94E-14 | 3645877  |
| C5_04260W_A | 10.26554 | 0.000225 | 3636451  |
| MTS1        | 10.25987 | 4.6E-12  | 3634873  |
| ASE1        | 10.25771 | 0.00013  | 3641729  |
| HXK2        | 10.25247 | 5.14E-10 | 3641015  |
| CEK1        | 10.23848 | 0.000155 | 3642789  |
| YCG1        | 10.23533 | 6.06E-10 | 3636639  |
| LMO1        | 10.1636  | 3.96E-11 | 3641403  |
| C1_11760C_A | 10.15285 | 1.83E-05 | 3645328  |
| TPD3        | 10.13759 | 2E-10    | 3638512  |
| C1_11960C_A | 10.13439 | 0.009532 | 30515060 |
| C1_10310W_A | 10.13351 | 0.009522 | 3634906  |
| MCR1        | 10.12668 | 1.71E-12 | 3647561  |
| CAT2        | 10.06675 | 6.69E-14 | 3635659  |
| PIL1        | 10.06168 | 2.38E-13 | 3644769  |
| PGA38       | 10.05275 | 0.000151 | 3637846  |
| CWH41       | 10.04355 | 1.71E-06 | 3646533  |
| ATP4        | 10.02631 | 4.69E-13 | 3643418  |
| C1_02650W_A | 9.971656 | 1.89E-10 | 3636818  |
| PST2        | 9.963044 | 0.000206 | 3643909  |
| MSH2        | 9.957326 | 7.14E-10 | 3642939  |
| CHS2        | 9.926038 | 2E-10    | 3641893  |
| POR1        | 9.902535 | 6.79E-14 | 3644698  |
| C2_03210W_A | 9.898869 | 0.00099  | 30515098 |
| ARO9        | 9.888109 | 2.39E-06 | 3641773  |
| CRN1        | 9.87458  | 1.59E-10 | 3637034  |
| CR_00130C_A | 9.860341 | 1.78E-07 | 3639709  |
| VCX1        | 9.860028 | 1.7E-07  | 3646508  |

|             |          |          |          |
|-------------|----------|----------|----------|
| C6_01960W_A | 9.840911 | 0.000271 | 3644559  |
| C1_07830C_A | 9.805499 | 0.011525 | 3640736  |
| C5_04550W_A | 9.803266 | 0.000149 | 3636508  |
| CR_07170W_A | 9.792285 | 6.96E-10 | 3645271  |
| C3_04740C_A | 9.701758 | 0.000263 | 3635251  |
| C1_05320C_A | 9.692795 | 2.97E-06 | 3642470  |
| RSR1        | 9.666845 | 4.45E-15 | 3640145  |
| C6_03090W_A | 9.662474 | 0.012542 | 3639275  |
| NGT1        | 9.652271 | 0.011294 | 3640573  |
| C5_00060C_A | 9.638743 | 2.25E-06 | 3647889  |
| IRO1        | 9.603299 | 9.76E-11 | 3636648  |
| FUM12       | 9.584904 | 4.8E-13  | 3638489  |
| HMG1        | 9.513454 | 1.44E-08 | 3644687  |
| FESUR1      | 9.510095 | 1.41E-10 | 3638514  |
| ARC35       | 9.493468 | 1.34E-06 | 3639823  |
| RPS17B      | 9.484877 | 3.55E-13 | 30515044 |
| C2_07720C_A | 9.482126 | 2.63E-15 | 3642304  |
| C7_03800W_A | 9.47853  | 0.000176 | 3643150  |
| POL2        | 9.467993 | 1.23E-09 | 3645733  |
| SEC18       | 9.446678 | 2.94E-11 | 3636208  |
| C1_10750C_A | 9.437349 | 0.001479 | 30515043 |
| C1_08080C_A | 9.436323 | 1.76E-07 | 30515029 |
| C6_04280W_A | 9.386194 | 6.57E-09 | 3646279  |
| MET13       | 9.373946 | 1.4E-07  | 3638382  |
| GLC3        | 9.359631 | 4.57E-15 | 3639200  |
| ERG5        | 9.344448 | 2.18E-12 | 3641400  |
| TRS20       | 9.343908 | 0.001625 | 3640214  |
| C6_02250W_A | 9.331064 | 0.012777 | 3645869  |
| C1_08440C_A | 9.310999 | 0.014665 | 3646487  |
| VMA7        | 9.300675 | 0.000221 | 3637332  |
| C6_00930C_A | 9.244839 | 1.98E-08 | 3644032  |
| FTR2        | 9.242276 | 4.56E-08 | 3643303  |
| APM4        | 9.21976  | 0.000206 | 3642297  |
| SPE3        | 9.181269 | 1.29E-06 | 3643528  |
| CR_02620C_A | 9.168958 | 3.84E-09 | 3642567  |
| BRN1        | 9.156548 | 1.11E-06 | 3641815  |
| KIP3        | 9.153625 | 2.87E-05 | 3641716  |
| C1_00830W_A | 9.151916 | 2.73E-05 | 3639344  |
| C1_03170C_A | 9.147193 | 0.014686 | 3636805  |
| C3_04630W_A | 9.120324 | 1.93E-06 | 3635189  |
| ALS1        | 9.081059 | 3.26E-12 | 3640280  |
| RNH35       | 9.065156 | 0.017378 | 3636987  |
| DED81       | 9.044533 | 1.33E-14 | 3646227  |
| CLA4        | 9.033886 | 1.05E-09 | 3634878  |
| C1_08730W_A | 9.025195 | 0.000209 | 3634938  |
| STV1        | 9.01022  | 9.06E-10 | 3646070  |
| SER33       | 8.999515 | 7.24E-11 | 3642030  |

|             |          |          |          |
|-------------|----------|----------|----------|
| IDH1        | 8.995368 | 1.51E-10 | 3634893  |
| ARP1        | 8.983969 | 0.002188 | 3646349  |
| ATP14       | 8.976509 | 3.84E-10 | 30515134 |
| CR_00880W_A | 8.97536  | 0.001755 | 3640397  |
| CR_07110C_A | 8.974158 | 0.001773 | 3648224  |
| TRX1        | 8.968119 | 1.02E-10 | 3638950  |
| PDA1        | 8.963139 | 2.22E-11 | 3642902  |
| FMA1        | 8.93735  | 0.021285 | 3647986  |
| C1_05490C_A | 8.913931 | 1.76E-07 | 3642507  |
| SPC2        | 8.882567 | 0.001778 | 3645769  |
| C4_03770W_A | 8.882307 | 0.001815 | 3645354  |
| PET9        | 8.833088 | 3.07E-13 | 3641587  |
| CAS1        | 8.830459 | 0.000228 | 3645324  |
| VAM3        | 8.82991  | 0.000236 | 3635146  |
| RKI1        | 8.788087 | 0.001978 | 3636574  |
| CR_02500W_A | 8.78643  | 2.54E-05 | 3647696  |
| EAP1        | 8.77866  | 2.98E-10 | 3643814  |
| ALG6        | 8.751692 | 5.05E-05 | 3647316  |
| CR_04730W_A | 8.73818  | 0.000227 | 3647305  |
| ERG9        | 8.721946 | 1.01E-08 | 3643913  |
| ILV6        | 8.72176  | 3.4E-07  | 3635598  |
| C6_02880W_A | 8.689884 | 0.015953 | 3639238  |
| C3_04780C_A | 8.688687 | 2.92E-07 | 3635214  |
| RHO3        | 8.674353 | 1.72E-06 | 3643448  |
| HIS1        | 8.602651 | 1.24E-06 | 3636501  |
| GDE1        | 8.59845  | 9.7E-11  | 3636505  |
| HEM14       | 8.56304  | 1.94E-06 | 3634923  |
| C4_00190W_A | 8.559777 | 0.002737 | 3645030  |
| ABP2        | 8.552977 | 0.000316 | 3643443  |
| ALG9        | 8.537892 | 1.15E-09 | 3644457  |
| C1_12240C_A | 8.534248 | 1.62E-06 | 3642023  |
| FGR51       | 8.522608 | 1.73E-06 | 3647796  |
| CR_05010W_A | 8.513179 | 0.002295 | 3646389  |
| SUB2        | 8.5077   | 3.57E-13 | 3645033  |
| C4_04440W_A | 8.498841 | 2.5E-07  | 3641177  |
| BFR1        | 8.477533 | 2.51E-10 | 3635579  |
| PGA33       | 8.472641 | 3.24E-07 | 3637350  |
| SMI1B       | 8.436931 | 0.000343 | 3643675  |
| C3_01940C_A | 8.408506 | 9.82E-07 | 3636600  |
| CR_09010C_A | 8.387913 | 5.08E-07 | 3641892  |
| MEP2        | 8.385093 | 0.000628 | 3645022  |
| C1_10520W_A | 8.36868  | 0.018254 | 3647191  |
| RTT109      | 8.36868  | 0.018291 | 3639678  |
| LIP6        | 8.368597 | 0.018675 | 3634890  |
| MEU1        | 8.329214 | 2.61E-06 | 3645635  |
| C6_01460C_A | 8.319925 | 3.81E-05 | 3641623  |
| SNG3        | 8.315827 | 4.95E-07 | 3646715  |

|             |          |          |          |
|-------------|----------|----------|----------|
| RFC4        | 8.307821 | 4.63E-06 | 3638994  |
| C2_05870W_A | 8.292107 | 0.025255 | 30515128 |
| CR_03020C_A | 8.284512 | 6.31E-07 | 3642598  |
| MET6        | 8.25508  | 1.76E-09 | 3640084  |
| C1_02700C_A | 8.248635 | 4.08E-08 | 30514972 |
| SEC8        | 8.181637 | 1.34E-07 | 3647078  |
| LAP41       | 8.181328 | 2.04E-07 | 3636653  |
| C6_00110C_A | 8.17525  | 2.68E-05 | 3647896  |
| HFL1        | 8.15811  | 0.002399 | 3636883  |
| C6_02490C_A | 8.15237  | 3.86E-06 | 3639171  |
| C1_05920W_A | 8.143221 | 2.02E-06 | 3639864  |
| HBR2        | 8.140497 | 6.04E-14 | 3646273  |
| C2_06920C_A | 8.134043 | 2.26E-05 | 3643524  |
| C6_03990C_A | 8.131798 | 2.57E-05 | 3640271  |
| RFC3        | 8.117662 | 0.000361 | 3647440  |
| C1_11280W_A | 8.103258 | 5.49E-07 | 3644554  |
| C7_04000W_A | 8.093082 | 2.21E-05 | 3643114  |
| IRR1        | 8.06563  | 1.67E-09 | 3643305  |
| CR_08480C_A | 8.060055 | 7.98E-06 | 30515442 |
| CAP4        | 8.050351 | 0.002352 | 3637335  |
| CR_04850C_A | 8.047113 | 0.021227 | 3647295  |
| POL3        | 8.032295 | 2.8E-08  | 3641359  |
| CR_03560W_A | 8.025752 | 0.002799 | 3643217  |
| CR_01280C_A | 8.002071 | 0.000182 | 3640400  |
| BNR1        | 7.966068 | 1.89E-06 | 3639672  |
| PHO113      | 7.93674  | 0.030548 | 3644946  |
| RPL24A      | 7.923298 | 1.27E-12 | 3641174  |
| C2_10470C_A | 7.907269 | 1.87E-07 | 3641196  |
| C3_01590W_A | 7.903444 | 0.000179 | 3636666  |
| C1_03490W_A | 7.891552 | 3.24E-07 | 3636914  |
| C6_03050C_A | 7.866425 | 0.002962 | 3639270  |
| MNN2        | 7.849802 | 4.78E-07 | 3644405  |
| SSA2        | 7.846883 | 8.02E-09 | 3644711  |
| EGD2        | 7.843061 | 4.33E-09 | 3635284  |
| RNH1        | 7.827031 | 4.94E-06 | 3639237  |
| C1_01010W_A | 7.821975 | 3.3E-07  | 3640181  |
| C3_00790W_A | 7.81903  | 1.37E-05 | 3648186  |
| C6_02530C_A | 7.815812 | 0.000626 | 3639175  |
| STE24       | 7.767165 | 5.13E-09 | 3645040  |
| ACS1        | 7.763806 | 5.32E-09 | 3643941  |
| CYP1        | 7.75619  | 3.73E-12 | 3636978  |
| SUR7        | 7.706893 | 1.19E-09 | 3641610  |
| PRD1        | 7.693694 | 1.31E-12 | 3642471  |
| C7_00410C_A | 7.663677 | 2.3E-06  | 3638033  |
| C5_05040W_A | 7.654646 | 0.000217 | 3636488  |
| CDC5        | 7.650964 | 7.24E-08 | 3639281  |
| AAT1        | 7.650044 | 2.2E-07  | 3643468  |

|             |          |          |          |
|-------------|----------|----------|----------|
| C1_00450C_A | 7.635932 | 4.58E-06 | 30514955 |
| GLO3        | 7.624594 | 9.37E-14 | 3640556  |
| C3_04420W_A | 7.6243   | 8.98E-09 | 3635180  |
| AGE3        | 7.606761 | 5.12E-07 | 3644565  |
| RNR21       | 7.594973 | 3.35E-08 | 3643021  |
| CR_09530C_A | 7.58459  | 2.65E-09 | 3647101  |
| RIM1        | 7.579211 | 1.39E-08 | 3639898  |
| SCP1        | 7.571755 | 0.026798 | 3646554  |
| C7_03350C_A | 7.566382 | 0.024814 | 3646722  |
| C5_04540C_A | 7.566193 | 0.025142 | 3636509  |
| C7_03160W_A | 7.558537 | 5.55E-10 | 3641345  |
| C2_09650W_A | 7.546439 | 6.46E-11 | 3643794  |
| FAS2        | 7.544842 | 7.02E-11 | 3635222  |
| PMT5        | 7.521355 | 4.08E-05 | 3639011  |
| IHD2        | 7.496636 | 6.35E-06 | 3639359  |
| MSC7        | 7.48625  | 5.4E-08  | 3645214  |
| MDH1        | 7.468483 | 1.51E-11 | 3639667  |
| CR_06510W_A | 7.452733 | 0.001013 | 3645264  |
| C1_14240W_A | 7.451793 | 8.67E-09 | 3643306  |
| CDC24       | 7.44946  | 1.75E-10 | 3643737  |
| CR_00690C_A | 7.443414 | 4.07E-05 | 3640390  |
| ALG5        | 7.407605 | 0.026878 | 3642558  |
| C4_03990C_A | 7.403923 | 0.004399 | 3648295  |
| FGR38       | 7.40221  | 2.14E-06 | 3645412  |
| CR_04560C_A | 7.386867 | 0.000127 | 3640946  |
| C1_06480C_A | 7.378509 | 2.92E-06 | 30515008 |
| SFH5        | 7.372171 | 2.35E-06 | 3634884  |
| STT3        | 7.369814 | 1E-07    | 3635743  |
| CR_09590W_A | 7.340683 | 2.59E-05 | 3647095  |
| INT1        | 7.335866 | 1.96E-11 | 3637761  |
| LHS1        | 7.335113 | 1.98E-08 | 3643032  |
| CR_07220C_A | 7.32733  | 3.74E-07 | 3646040  |
| C1_12180C_A | 7.32362  | 0.000892 | 3642038  |
| CR_01430W_A | 7.290933 | 0.001063 | 3640138  |
| MMS22       | 7.287089 | 0.000371 | 3639681  |
| ERG251      | 7.282761 | 7.99E-08 | 3635716  |
| PGA10       | 7.276242 | 0.005489 | 3645009  |
| KSR1        | 7.254735 | 0.000247 | 3646052  |
| C2_02670C_A | 7.243369 | 0.029305 | 3643008  |
| YPT72       | 7.221286 | 3.41E-06 | 3643523  |
| C1_11740W_A | 7.216234 | 0.001101 | 3645317  |
| RDI1        | 7.213295 | 9.27E-12 | 3635167  |
| VPS1        | 7.209433 | 6.1E-12  | 3642656  |
| YHB5        | 7.202401 | 1.27E-10 | 3647343  |
| CMK2        | 7.176987 | 5.79E-09 | 3643961  |
| C2_10830W_A | 7.170045 | 0.006415 | 30515170 |
| C1_03240W_A | 7.143187 | 0.001156 | 3636895  |



|             |          |          |          |
|-------------|----------|----------|----------|
| LTE1        | 7.141208 | 3.77E-10 | 3643495  |
| C4_04230W_A | 7.14074  | 0.001296 | 3646857  |
| HIS5        | 7.12778  | 0.005571 | 3645756  |
| PFY1        | 7.12612  | 2.88E-10 | 3640703  |
| CR_05680C_A | 7.108553 | 0.000366 | 3646684  |
| C3_02190C_A | 7.096758 | 3.56E-07 | 3636642  |
| C1_00420W_A | 7.074879 | 4.24E-07 | 3639286  |
| SMP3        | 7.056837 | 0.032737 | 3642980  |
| CR_01320C_A | 7.026968 | 4.31E-05 | 3640386  |
| PYC2        | 7.022745 | 1.38E-10 | 3637323  |
| CRC1        | 7.014389 | 4.88E-06 | 3640112  |
| C7_02080W_A | 7.004266 | 0.000296 | 3637025  |
| ERG4        | 6.994406 | 1.7E-12  | 3640511  |
| GIT2        | 6.980066 | 1.73E-07 | 3642633  |
| C3_03510C_A | 6.959991 | 7.7E-06  | 3638310  |
| C6_00270W_A | 6.95989  | 2.39E-06 | 3646066  |
| MNN24       | 6.955644 | 2.4E-09  | 3638789  |
| EGD1        | 6.919573 | 1.88E-10 | 3645340  |
| C1_01290C_A | 6.912635 | 0.006429 | 3640184  |
| CSH1        | 6.903981 | 3.49E-05 | 3646427  |
| YPT31       | 6.887905 | 1.88E-08 | 3647999  |
| C7_00600C_A | 6.862371 | 0.000341 | 3638031  |
| C3_01310W_A | 6.858862 | 0.000245 | 3636620  |
| RPP2A       | 6.847927 | 4.73E-09 | 30515439 |
| BEM2        | 6.841657 | 4.18E-08 | 3637044  |
| C5_04410C_A | 6.803548 | 0.00158  | 3636410  |
| AMO2        | 6.802478 | 0.002105 | 3648021  |
| C1_11860W_A | 6.798501 | 7.47E-08 | 3642009  |
| ADH2        | 6.79738  | 8.16E-08 | 3640751  |
| CR_01100C_A | 6.766071 | 0.034912 | 3640378  |
| C7_02520W_A | 6.76398  | 0.034105 | 3636941  |
| BET4        | 6.758127 | 0.006008 | 3644695  |
| CR_01080W_A | 6.736187 | 3.67E-08 | 3640381  |
| DBF4        | 6.734481 | 3.83E-06 | 3641388  |
| C6_02160W_A | 6.721016 | 0.000177 | 3645889  |
| C4_04920W_A | 6.704455 | 0.000246 | 3641172  |
| HOF1        | 6.676456 | 0.001769 | 3645014  |
| CHT3        | 6.653313 | 0.000252 | 3638967  |
| ENA21       | 6.651553 | 2.65E-07 | 3641392  |
| PSF2        | 6.611154 | 0.03745  | 3647534  |
| C5_02110W_A | 6.605619 | 3.35E-06 | 3637732  |
| C6_01560W_A | 6.603673 | 0.000322 | 3641652  |
| ILV2        | 6.593671 | 5.58E-07 | 3636552  |
| C2_03020C_A | 6.583469 | 2.22E-08 | 3643019  |
| C5_01070C_A | 6.569333 | 6.09E-06 | 3642627  |
| COX4        | 6.564612 | 1.94E-10 | 3635737  |
| ARC40       | 6.563982 | 3.73E-09 | 3644866  |

|             |          |          |          |
|-------------|----------|----------|----------|
| C2_05560W_A | 6.560855 | 0.001965 | 3645561  |
| VPS51       | 6.560824 | 0.001913 | 3639242  |
| C5_01440C_A | 6.553683 | 0.000384 | 3647043  |
| APG7        | 6.549614 | 0.000174 | 3646615  |
| C2_08650W_A | 6.538214 | 6.64E-08 | 3643908  |
| C2_01690W_A | 6.537535 | 2.31E-08 | 3635728  |
| MCM3        | 6.501489 | 1.56E-07 | 3645223  |
| C4_02400C_A | 6.496218 | 0.002345 | 3637851  |
| PCK1        | 6.49435  | 2.66E-10 | 3639701  |
| C7_01320W_A | 6.493986 | 3.39E-06 | 3645896  |
| SNL1        | 6.492948 | 3.31E-06 | 3647192  |
| PHM7        | 6.488169 | 6.1E-10  | 3642329  |
| TSC11       | 6.48033  | 0.007843 | 3645267  |
| GPI7        | 6.478684 | 3.97E-05 | 3647672  |
| RTS1        | 6.467708 | 1.6E-12  | 3646557  |
| C6_02200C_A | 6.455239 | 0.040015 | 3645863  |
| MCT1        | 6.452952 | 1.92E-06 | 3646683  |
| C2_01730W_A | 6.449082 | 0.040744 | 3635732  |
| HNT2        | 6.442981 | 0.038625 | 3642271  |
| VRG4        | 6.43318  | 3.66E-06 | 3641768  |
| CCC1        | 6.418649 | 1.41E-05 | 3645645  |
| C3_05280C_A | 6.409969 | 0.000805 | 3635202  |
| COX6        | 6.40711  | 2.41E-10 | 30515099 |
| PEX11       | 6.403901 | 0.000414 | 3646288  |
| CR_02210W_A | 6.401627 | 2.25E-10 | 3644943  |
| DCK1        | 6.387307 | 9.11E-10 | 3637383  |
| HOM3        | 6.378204 | 0.000497 | 3641771  |
| STE13       | 6.319996 | 7.42E-05 | 3647597  |
| GCF1        | 6.313843 | 3.24E-08 | 3646498  |
| CR_05200C_A | 6.304374 | 0.000452 | 3648080  |
| C7_03640C_A | 6.295587 | 0.008905 | 3646223  |
| C2_09970C_A | 6.292126 | 2.71E-09 | 3643820  |
| CDC47       | 6.287148 | 3.23E-07 | 3645780  |
| HGT13       | 6.282214 | 0.041733 | 3638047  |
| PHO114      | 6.282045 | 0.04104  | 3635644  |
| HSP12       | 6.271877 | 4.15E-06 | 3643745  |
| C3_02210C_A | 6.249299 | 0.000102 | 3636641  |
| C4_01840C_A | 6.247645 | 0.00018  | 3635592  |
| RPS15       | 6.208103 | 2.17E-10 | 3635194  |
| FRS2        | 6.199135 | 2.11E-09 | 3636824  |
| C4_05080C_A | 6.194019 | 0.000366 | 3641129  |
| PLD1        | 6.193018 | 4.62E-08 | 3645329  |
| C4_06460C_A | 6.189042 | 0.012448 | 3642791  |
| C6_02480W_A | 6.18893  | 0.003269 | 3639170  |
| CR_04880W_A | 6.180917 | 0.000795 | 3647309  |
| PUP2        | 6.178426 | 2.33E-08 | 3646617  |
| C1_08800W_A | 6.137277 | 9.81E-05 | 3634791  |

|             |          |          |          |
|-------------|----------|----------|----------|
| CDC50       | 6.123485 | 5.57E-06 | 3640302  |
| C2_04450W_A | 6.121891 | 0.044838 | 3645467  |
| C5_03370C_A | 6.121829 | 0.045151 | 3646350  |
| CR_04870C_A | 6.118776 | 0.012789 | 3647310  |
| C5_00840W_A | 6.113652 | 0.010533 | 3644130  |
| C1_10540C_A | 6.113129 | 0.000807 | 3647193  |
| RHO2        | 6.110082 | 0.000763 | 30515143 |
| MVB12       | 6.107445 | 0.00075  | 30515400 |
| VMA13       | 6.045543 | 1.61E-08 | 30515402 |
| NDE1        | 6.03486  | 9.76E-07 | 3638354  |
| C1_13280C_A | 6.021194 | 1.94E-05 | 3636145  |
| MNN10       | 6.017072 | 1.4E-05  | 3644997  |
| C4_06940C_A | 6.012313 | 0.000495 | 3642928  |
| TEF2        | 6.008055 | 1.81E-09 | 3646502  |
| SEC62       | 5.999961 | 1.65E-05 | 3636860  |
| C7_03410C_A | 5.997671 | 0.000101 | 3646716  |
| MDH1-3      | 5.984089 | 2.79E-07 | 3641197  |
| SPC98       | 5.979155 | 2.48E-05 | 3640113  |
| C6_00180C_A | 5.961379 | 0.04732  | 3646081  |
| C2_05860C_A | 5.961069 | 0.048514 | 3647473  |
| C2_01910W_A | 5.961069 | 0.048696 | 3635790  |
| C1_04030W_A | 5.911789 | 0.003368 | 3646428  |
| C2_10860C_A | 5.910053 | 1.44E-09 | 3641233  |
| C1_10460W_A | 5.901853 | 8.04E-07 | 3647183  |
| KAR9        | 5.898675 | 0.000457 | 3636136  |
| CR_07230W_A | 5.893197 | 5.06E-05 | 3646031  |
| C6_03310W_A | 5.864271 | 3.26E-05 | 3639197  |
| CR_02260C_A | 5.857713 | 0.000971 | 3644912  |
| C2_09780C_A | 5.840243 | 1.99E-05 | 3643805  |
| GNA1        | 5.827846 | 0.000132 | 3637397  |
| CR_04020C_A | 5.827621 | 0.000121 | 3640969  |
| C5_01410C_A | 5.826341 | 8.83E-06 | 3647054  |
| C3_07140C_A | 5.818399 | 0.000396 | 3638439  |
| CDC20       | 5.808094 | 8.19E-06 | 3644057  |
| AHP2        | 5.807548 | 5.05E-05 | 3636977  |
| C6_00200C_A | 5.804897 | 3.42E-06 | 3646082  |
| PRN4        | 5.804875 | 0.000867 | 3639877  |
| PXA2        | 5.800421 | 7.61E-09 | 3642055  |
| PLC2        | 5.782585 | 0.002859 | 3642985  |
| CHS8        | 5.779322 | 5.7E-09  | 3640532  |
| C1_05670W_A | 5.773193 | 3.37E-06 | 3639899  |
| CR_08560C_A | 5.759844 | 2.65E-08 | 3642142  |
| C2_03450W_A | 5.754134 | 0.000876 | 3637349  |
| C2_02020W_A | 5.750284 | 5.48E-06 | 3635769  |
| TFP1        | 5.746505 | 9.17E-09 | 3636662  |
| FGR6-1      | 5.741761 | 0.012594 | 3647947  |
| SMC4        | 5.734552 | 5.57E-09 | 3641578  |

|             |          |          |          |
|-------------|----------|----------|----------|
| C6_04250W_A | 5.732911 | 2.63E-11 | 30515345 |
| FCY2        | 5.729148 | 9.66E-05 | 3638365  |
| C3_06610W_A | 5.716756 | 5.08E-05 | 3642248  |
| CR_08670C_A | 5.705934 | 0.001052 | 3642126  |
| C3_00850C_A | 5.705703 | 4.92E-08 | 3647748  |
| C4_06810C_A | 5.694718 | 1.63E-08 | 3642916  |
| PGA59       | 5.69294  | 4.6E-09  | 3637881  |
| C2_02660W_A | 5.686738 | 4.78E-05 | 3643009  |
| KEX2        | 5.681236 | 6.11E-08 | 3634914  |
| C2_05850C_A | 5.671845 | 6.82E-05 | 3647472  |
| HIS7        | 5.657027 | 0.000223 | 3647868  |
| CR_07120C_A | 5.653014 | 0.003063 | 3648225  |
| TOM20       | 5.649452 | 0.000164 | 3636817  |
| C3_03160C_A | 5.648973 | 0.013054 | 3638424  |
| RAD7        | 5.647853 | 3.18E-05 | 3635833  |
| ACC1        | 5.639822 | 1.29E-08 | 3639688  |
| TIP1        | 5.620211 | 0.000504 | 3636512  |
| ATP7        | 5.616927 | 1.2E-07  | 3646672  |
| RHB1        | 5.605438 | 0.017558 | 3635232  |
| APM1        | 5.601195 | 1.16E-05 | 3636424  |
| ZCF24       | 5.599659 | 0.001462 | 3645417  |
| MMD1        | 5.591155 | 6.13E-09 | 30515015 |
| C3_05550C_A | 5.588403 | 1.18E-05 | 3643659  |
| C2_02840C_A | 5.588069 | 3.48E-06 | 3642976  |
| C2_09760W_A | 5.587354 | 0.003323 | 3643807  |
| C1_02890C_A | 5.55646  | 0.013674 | 3636867  |
| BUB2        | 5.556226 | 0.013719 | 3643030  |
| C1_05950C_A | 5.548632 | 3.03E-06 | 3639859  |
| MP65        | 5.546416 | 2.42E-09 | 3643951  |
| SEC61       | 5.537931 | 5.06E-07 | 3647462  |
| C1_01950C_A | 5.522795 | 0.004086 | 3645421  |
| TRP4        | 5.465725 | 0.016072 | 3642904  |
| C2_08540C_A | 5.464168 | 0.014757 | 3643920  |
| C2_05170W_A | 5.462861 | 0.000548 | 3643462  |
| C2_03340W_A | 5.441992 | 0.000213 | 3637392  |
| C1_13320C_A | 5.441274 | 1.6E-07  | 3636149  |
| HXT5        | 5.427664 | 0.000585 | 3643209  |
| C3_00170C_A | 5.41567  | 4.17E-06 | 3640589  |
| C6_02560W_A | 5.408678 | 0.001142 | 3639205  |
| MNN26       | 5.406483 | 1.45E-05 | 3646240  |
| RDH54       | 5.39593  | 2.09E-05 | 3641231  |
| KAR2        | 5.395789 | 5.81E-06 | 3638830  |
| CR_01300W_A | 5.391028 | 3.93E-05 | 30515373 |
| MPT5        | 5.384591 | 1.44E-05 | 3636205  |
| C4_00330C_A | 5.380297 | 1.93E-07 | 30515227 |
| SNG4        | 5.374003 | 1.56E-07 | 3646714  |
| C4_01460C_A | 5.3713   | 0.017159 | 3635622  |

|             |          |          |          |
|-------------|----------|----------|----------|
| CHS6        | 5.370905 | 0.000119 | 3641377  |
| SPC19       | 5.367303 | 0.018332 | 3646423  |
| ARE2        | 5.364474 | 3.25E-06 | 3643526  |
| RIB5        | 5.357946 | 1.17E-08 | 3636499  |
| TPI1        | 5.345601 | 1.69E-07 | 3638482  |
| C1_10090C_A | 5.345236 | 1.45E-07 | 3634817  |
| C3_07460W_A | 5.333868 | 2.27E-06 | 3638480  |
| MCI4        | 5.332539 | 6.42E-06 | 3640118  |
| RAD10       | 5.326851 | 0.008373 | 3639884  |
| SRD1        | 5.321821 | 1.37E-05 | 3635764  |
| ADE1        | 5.306125 | 6.74E-06 | 3639722  |
| APN1        | 5.285297 | 0.000183 | 3642263  |
| C1_01250W_A | 5.279983 | 1.46E-05 | 3640212  |
| C3_03270W_A | 5.279496 | 0.018042 | 3638321  |
| CDC6        | 5.279037 | 0.01754  | 3642034  |
| ROB1        | 5.269637 | 8.43E-07 | 3636212  |
| C6_03320W_A | 5.265234 | 0.00647  | 3639198  |
| C6_04340W_A | 5.259641 | 1.17E-05 | 3646291  |
| KIP2        | 5.254549 | 0.002012 | 3643954  |
| CTA2        | 5.240884 | 1.48E-05 | 3639372  |
| IQG1        | 5.233774 | 5.32E-06 | 3637052  |
| C3_01900C_A | 5.215383 | 0.001387 | 3636559  |
| ORC3        | 5.206739 | 0.00012  | 3645639  |
| CR_04080C_A | 5.205575 | 2.92E-07 | 3641023  |
| C3_01910C_A | 5.204505 | 1.67E-06 | 30515182 |
| C6_03960W_A | 5.202717 | 2.23E-06 | 3640269  |
| AYR1        | 5.202557 | 0.00077  | 3647754  |
| C1_04580C_A | 5.200727 | 0.000427 | 3646132  |
| CR_07350W_A | 5.19665  | 8.03E-09 | 3646055  |
| C4_06160W_A | 5.186989 | 0.018647 | 3642819  |
| C1_02780W_A | 5.181901 | 5.17E-05 | 3636871  |
| APL5        | 5.179182 | 1.42E-05 | 3638377  |
| CR_02680W_A | 5.167768 | 0.000743 | 3642573  |
| CLB2        | 5.165038 | 1.16E-07 | 3635840  |
| CTF18       | 5.165003 | 5.09E-05 | 3640431  |
| ARP9        | 5.162479 | 9.67E-05 | 3639829  |
| C1_07340W_A | 5.161156 | 1.62E-07 | 3644472  |
| YSA1        | 5.153465 | 0.000198 | 3638516  |
| C1_06200W_A | 5.153035 | 1.07E-05 | 3648300  |
| C2_05130W_A | 5.14359  | 0.003476 | 3643458  |
| CAK1        | 5.14038  | 0.000552 | 3637352  |
| NCE4        | 5.132869 | 0.007503 | 3641194  |
| TFC4        | 5.121373 | 8.17E-06 | 3638420  |
| CAT1        | 5.119732 | 6.74E-06 | 3639495  |
| C1_12700W_A | 5.108551 | 0.000727 | 3646831  |
| C4_03050C_A | 5.101145 | 0.000227 | 3637930  |
| C1_02680C_A | 5.095175 | 0.000169 | 3636822  |

|             |          |          |         |
|-------------|----------|----------|---------|
| PHO89       | 5.090412 | 4.4E-09  | 3635633 |
| MON2        | 5.08548  | 2.56E-07 | 3636201 |
| C3_01510W_A | 5.073075 | 0.000887 | 3636571 |
| CAT8        | 5.063664 | 0.003915 | 3640745 |
| SEC24       | 5.061266 | 4.29E-06 | 3634939 |
| C1_03410W_A | 5.058775 | 0.003513 | 3636905 |
| C1_02970W_A | 5.04345  | 4.74E-07 | 3636835 |
| HYU1        | 5.042297 | 3.87E-07 | 3643024 |
| CR_05840W_A | 5.034992 | 0.000206 | 3646704 |
| ADO1        | 5.030799 | 5.43E-07 | 3639274 |
| C3_02290W_A | 5.025611 | 0.0002   | 3636556 |
| C3_07110W_A | 5.022486 | 1.82E-05 | 3638442 |
| CR_09670C_A | 5.005694 | 7.92E-05 | 3647091 |
| C2_07110C_A | 5.005165 | 0.000902 | 3643505 |
| C7_03200C_A | 5.004187 | 0.000393 | 3641342 |
| C5_04790C_A | 5.001977 | 0.022624 | 3636446 |
| C1_07850C_A | 5.001928 | 0.022317 | 3640739 |
| C1_00790W_A | 5.001079 | 0.009034 | 3639348 |
| LRO1        | 4.996568 | 1.35E-07 | 3639356 |
| SEC34       | 4.993431 | 3.41E-06 | 3644455 |
| C1_00210C_A | 4.993343 | 3.2E-06  | 3639335 |
| C3_00470W_A | 4.97212  | 1.9E-05  | 3640520 |
| C6_00910C_A | 4.95972  | 3.35E-08 | 3644030 |
| MES1        | 4.958134 | 6.71E-08 | 3636516 |
| C6_00540W_A | 4.955127 | 0.004117 | 3647146 |
| PEX8        | 4.954602 | 0.003663 | 3647393 |
| MAE1        | 4.946239 | 2.97E-10 | 3641615 |
| HYS2        | 4.945402 | 0.000277 | 3636441 |
| C1_07840W_A | 4.931672 | 7.97E-08 | 3640737 |
| C1_07440W_A | 4.924076 | 8.9E-08  | 3644482 |
| C1_01000C_A | 4.92338  | 0.001127 | 3640180 |
| YCS4        | 4.920929 | 6.78E-07 | 3645196 |
| C7_00420C_A | 4.908745 | 0.00026  | 3638032 |
| WBP1        | 4.908324 | 6.53E-08 | 3644398 |
| C1_07010W_A | 4.905207 | 0.004479 | 3639537 |
| C7_01740C_A | 4.905016 | 0.004235 | 3637010 |
| SWI4        | 4.902355 | 2.64E-05 | 3645408 |
| SEC27       | 4.895247 | 1.21E-08 | 3645870 |
| MUM2        | 4.878373 | 2.35E-07 | 3636432 |
| C3_00910W_A | 4.874062 | 0.008782 | 3647755 |
| SSO2        | 4.866723 | 1.1E-08  | 3643809 |
| C1_07780W_A | 4.86401  | 1.11E-05 | 3647955 |
| GPX3        | 4.854582 | 0.004111 | 3644471 |
| TLO1        | 4.852362 | 2.28E-05 | 3639677 |
| C1_12400C_A | 4.846333 | 0.004738 | 3642059 |
| IFA21       | 4.842473 | 0.006799 | 3641344 |
| UBA2        | 4.840912 | 0.000944 | 3640701 |

|             |          |          |          |
|-------------|----------|----------|----------|
| DAM1        | 4.838004 | 4.97E-05 | 3634820  |
| CPR3        | 4.831672 | 7.88E-06 | 3635812  |
| CR_03530W_A | 4.825962 | 2E-10    | 3643204  |
| HOC1        | 4.823689 | 9.34E-05 | 3641605  |
| C4_00800W_A | 4.823254 | 0.032054 | 3645757  |
| DCC1        | 4.820872 | 0.029231 | 3638037  |
| C4_04280C_A | 4.80902  | 0.009181 | 3646846  |
| C6_03950C_A | 4.80402  | 0.004233 | 3640268  |
| ASN1        | 4.80265  | 1.96E-07 | 3645790  |
| DSL1        | 4.801433 | 0.010247 | 3645718  |
| C6_01360W_A | 4.800771 | 0.004606 | 3641608  |
| CSR1        | 4.798353 | 0.010579 | 3641162  |
| FRP3        | 4.763627 | 5.59E-06 | 3648102  |
| ATP16       | 4.762991 | 6.68E-07 | 3638963  |
| C4_01910W_A | 4.740172 | 0.000554 | 3635635  |
| PLC1        | 4.718913 | 0.000174 | 3647860  |
| C6_03040C_A | 4.716147 | 0.000194 | 3639269  |
| GSP1        | 4.711264 | 3.13E-10 | 3646925  |
| C1_02290C_A | 4.704742 | 0.004348 | 3644568  |
| C7_01950W_A | 4.703549 | 0.0002   | 3636970  |
| ARO3        | 4.697084 | 2.07E-05 | 3635770  |
| C2_07420W_A | 4.696644 | 0.000828 | 3645202  |
| UAP1        | 4.696102 | 9.52E-07 | 3637769  |
| MNN12       | 4.688459 | 2.34E-08 | 3634904  |
| IST2        | 4.688455 | 3.18E-07 | 3646662  |
| CMD1        | 4.679079 | 9.54E-08 | 3646520  |
| C4_04160W_A | 4.670443 | 6.15E-07 | 3641185  |
| RPL43A      | 4.655837 | 1.35E-06 | 30515319 |
| C1_05900W_A | 4.650568 | 4.57E-07 | 3639866  |
| SFL2        | 4.649303 | 1.4E-05  | 3636434  |
| DNM1        | 4.647173 | 5.82E-08 | 3643673  |
| C3_04970C_A | 4.641867 | 6.04E-07 | 3635164  |
| C2_04170C_A | 4.64148  | 2.28E-06 | 30515111 |
| ERG27       | 4.640639 | 2.46E-05 | 3640432  |
| C4_05340W_A | 4.639429 | 0.000286 | 3646947  |
| C1_03440C_A | 4.637796 | 1.07E-05 | 3636908  |
| C6_02280W_A | 4.634447 | 0.000136 | 3645872  |
| END3        | 4.633541 | 0.000292 | 3636644  |
| C7_03780C_A | 4.632326 | 0.03077  | 3643119  |
| IPL1        | 4.629876 | 0.000979 | 3645876  |
| C5_04420W_A | 4.628748 | 0.000817 | 3636411  |
| COX7        | 4.628554 | 9.01E-07 | 3638339  |
| C7_00150W_A | 4.61857  | 6.47E-08 | 3637973  |
| GAL4        | 4.611891 | 3.04E-07 | 3641244  |
| FGR34       | 4.604941 | 3.16E-05 | 3639033  |
| IDH2        | 4.603447 | 5.09E-10 | 3642979  |
| C2_05800C_A | 4.603286 | 2.64E-05 | 3645584  |

|             |          |          |          |
|-------------|----------|----------|----------|
| C3_04650W_A | 4.60256  | 0.00187  | 3635192  |
| PDC11       | 4.584154 | 1.04E-05 | 3642780  |
| SEC26       | 4.574293 | 1.5E-07  | 3641005  |
| HUT1        | 4.566915 | 0.040181 | 3638505  |
| ERG12       | 4.564335 | 0.000131 | 3634859  |
| C4_00770C_A | 4.562294 | 0.000847 | 3645760  |
| ECM39       | 4.562207 | 0.000885 | 3641386  |
| C2_07980W_A | 4.558492 | 0.001855 | 3642312  |
| C1_10630C_A | 4.555031 | 0.005541 | 3647683  |
| MEA1        | 4.554808 | 0.005453 | 3635154  |
| ARP2        | 4.553145 | 4.88E-07 | 3641915  |
| MNN21       | 4.551438 | 1.91E-05 | 3648124  |
| NUO2        | 4.550327 | 1E-06    | 3638381  |
| ILV3        | 4.549849 | 9.2E-06  | 3636428  |
| SMF3        | 4.548387 | 5.67E-05 | 3638852  |
| C2_00400C_A | 4.542667 | 4.93E-08 | 3638821  |
| AOX1        | 4.542652 | 0.015243 | 3634946  |
| HEM4        | 4.542085 | 0.002693 | 3643942  |
| C3_03340C_A | 4.538204 | 0.000362 | 30515195 |
| C4_00410W_A | 4.536999 | 0.000263 | 3645019  |
| C1_08050W_A | 4.525187 | 1.53E-06 | 3640709  |
| C6_01750C_A | 4.520798 | 0.037083 | 3641640  |
| CYC1        | 4.516209 | 7.71E-06 | 3643937  |
| DNA2        | 4.504826 | 0.000102 | 3646072  |
| ABP1        | 4.501505 | 2.34E-07 | 3637875  |
| MTW1        | 4.484703 | 0.013482 | 3643783  |
| PXA1        | 4.48181  | 1.17E-07 | 3639713  |
| GEA2        | 4.480275 | 2.12E-05 | 3636646  |
| STE23       | 4.473363 | 1.42E-05 | 3639236  |
| UGP1        | 4.471173 | 7.54E-06 | 3648144  |
| C5_04770W_A | 4.459611 | 0.001228 | 3636444  |
| C3_06920W_A | 4.456419 | 0.001112 | 3638511  |
| C3_04590W_A | 4.451449 | 1.48E-06 | 30515204 |
| C3_01420C_A | 4.449413 | 0.004192 | 3636634  |
| GAT1        | 4.449152 | 0.001426 | 3641794  |
| FUM11       | 4.437804 | 7.03E-06 | 3641016  |
| C4_06240W_A | 4.435984 | 0.002727 | 3642807  |
| PGA53       | 4.435099 | 0.000944 | 3635599  |
| KGD1        | 4.415629 | 9.26E-06 | 3647752  |
| C4_04250W_A | 4.415405 | 0.000243 | 3646855  |
| C7_01930C_A | 4.414357 | 0.000906 | 3637027  |
| PSD2        | 4.411249 | 8.33E-07 | 3636515  |
| YHM2        | 4.40138  | 1.8E-06  | 3647137  |
| CR_01180W_A | 4.401343 | 0.000154 | 3640427  |
| C2_08930W_A | 4.396121 | 3.3E-05  | 3645795  |
| ATP20       | 4.386884 | 4.41E-05 | 3647602  |
| TFS1        | 4.381979 | 2.64E-06 | 3642655  |



|             |          |          |          |
|-------------|----------|----------|----------|
| RPL8B       | 4.381    | 5.48E-08 | 3635198  |
| C3_07450C_A | 4.370762 | 0.005891 | 3638481  |
| SEC4        | 4.36042  | 2.27E-07 | 3640119  |
| C1_00630W_A | 4.354676 | 0.003211 | 3639380  |
| GWT1        | 4.354455 | 0.001233 | 3645575  |
| GYP1        | 4.34222  | 1.36E-05 | 3641138  |
| SPF1        | 4.338655 | 4.59E-07 | 3646573  |
| CR_00270C_A | 4.327339 | 0.047599 | 3639720  |
| KRE5        | 4.323129 | 0.000263 | 3638384  |
| C1_01050C_A | 4.317439 | 0.00024  | 3640170  |
| LCB2        | 4.314051 | 1.7E-06  | 3636181  |
| NIF3        | 4.302141 | 0.003929 | 3646527  |
| CR_07600W_A | 4.291347 | 0.000826 | 3644849  |
| C2_08380C_A | 4.286406 | 0.001243 | 3648253  |
| NPT1        | 4.275597 | 0.00024  | 3643109  |
| CR_02570C_A | 4.273882 | 0.005042 | 3647685  |
| C1_14170W_A | 4.265276 | 1.46E-07 | 3643323  |
| SEC10       | 4.249524 | 1.15E-05 | 3642961  |
| C1_08780W_A | 4.249179 | 2.98E-05 | 3634789  |
| C1_14530W_A | 4.247813 | 6.52E-05 | 3643333  |
| GDB1        | 4.246562 | 1.43E-05 | 3647409  |
| C1_13190W_A | 4.240028 | 3.52E-08 | 3636163  |
| C6_01050W_A | 4.238121 | 0.000277 | 3644015  |
| FMO2        | 4.237041 | 0.04674  | 3637440  |
| ARC19       | 4.225909 | 0.017203 | 3640418  |
| CPY1        | 4.225845 | 2.05E-05 | 3646721  |
| SEC3        | 4.222032 | 2.88E-06 | 3642806  |
| SGT2        | 4.220747 | 3.48E-07 | 3642978  |
| FBA1        | 4.217607 | 8.19E-06 | 3635585  |
| HEM13       | 4.20794  | 7.98E-05 | 3647390  |
| ANB1        | 4.179347 | 9.1E-07  | 3641648  |
| FEN12       | 4.176478 | 4.36E-05 | 3637404  |
| ZCF7        | 4.160471 | 0.018418 | 3636667  |
| CR_05880W_A | 4.155096 | 0.007611 | 3646702  |
| C4_01760W_A | 4.149698 | 0.000175 | 3635584  |
| CR_07460C_A | 4.14082  | 0.000727 | 3646049  |
| CAM1-1      | 4.1365   | 4.08E-05 | 3646358  |
| C2_02950W_A | 4.127724 | 0.00693  | 3643012  |
| ERG7        | 4.124818 | 2.63E-07 | 3635761  |
| C2_09560C_A | 4.124289 | 0.000517 | 3643813  |
| C4_07240W_A | 4.123152 | 0.000247 | 3642945  |
| C3_01800C_A | 4.109931 | 4.3E-06  | 3636586  |
| C3_04460W_A | 4.107725 | 6.09E-05 | 3635208  |
| C5_02900W_A | 4.107609 | 7.14E-05 | 3637747  |
| C5_02050W_A | 4.10191  | 6.23E-07 | 3643768  |
| DAD4        | 4.095913 | 0.019511 | 30515433 |
| RPS12       | 4.094761 | 7.06E-06 | 3638438  |

|             |          |          |          |
|-------------|----------|----------|----------|
| BUD7        | 4.087938 | 6.81E-07 | 3647228  |
| TLO9        | 4.083234 | 0.000925 | 3648051  |
| C2_09910C_A | 4.078411 | 0.045847 | 30515162 |
| C7_03150W_A | 4.076665 | 0.048928 | 3641346  |
| SGO1        | 4.070276 | 0.000117 | 3643464  |
| ADE6        | 4.047355 | 1.98E-05 | 3647304  |
| C4_04860W_A | 4.046734 | 0.012334 | 3641161  |
| C1_00330C_A | 4.046574 | 0.001846 | 3639296  |
| THR4        | 4.038758 | 2.99E-06 | 3637711  |
| APS3        | 4.034107 | 0.007543 | 3646491  |
| ARO8        | 4.033546 | 8.58E-06 | 3638828  |
| C1_11250W_A | 4.030469 | 0.000862 | 3644556  |
| CDC73       | 4.019971 | 0.000141 | 3636830  |
| C3_05010C_A | 4.015491 | 0.001611 | 3635169  |
| C6_02090C_A | 3.99192  | 4.26E-07 | 6335445  |
| C2_07100W_A | 3.989987 | 2.31E-05 | 3643504  |
| C5_00610C_A | 3.98634  | 0.00265  | 3641585  |
| C7_01480W_A | 3.978337 | 0.002105 | 3636956  |
| MKK2        | 3.977241 | 3.4E-07  | 3645580  |
| OBPA        | 3.975314 | 3.05E-06 | 3643764  |
| PAN3        | 3.971254 | 9.46E-05 | 3636464  |
| VPS23       | 3.969035 | 0.025143 | 3644401  |
| C2_00730C_A | 3.964431 | 0.001603 | 3638913  |
| C1_02320C_A | 3.964268 | 2.55E-07 | 3644572  |
| C4_00380W_A | 3.959156 | 0.008211 | 3645015  |
| C1_00920W_A | 3.959081 | 7.2E-05  | 3639283  |
| SHP1        | 3.947311 | 8.97E-06 | 3640083  |
| MET14       | 3.942548 | 0.02389  | 3641547  |
| C4_04330C_A | 3.94015  | 7.52E-07 | 3646840  |
| TYR1        | 3.939658 | 0.001208 | 3635639  |
| C4_06020C_A | 3.939296 | 2.69E-05 | 3646519  |
| C2_04180C_A | 3.930381 | 0.000416 | 3637330  |
| C2_06110W_A | 3.93013  | 8.04E-05 | 3644094  |
| C1_03540C_A | 3.926257 | 0.027821 | 3636920  |
| C1_02270C_A | 3.916815 | 0.016149 | 3644566  |
| C1_12740W_A | 3.914867 | 9.13E-05 | 3646819  |
| MAD2        | 3.901525 | 0.023913 | 3644696  |
| C1_07820W_A | 3.901361 | 0.025003 | 3640735  |
| MED20       | 3.9011   | 0.025028 | 30515250 |
| SAS3        | 3.899297 | 8.05E-05 | 3640073  |
| FGR6-4      | 3.896272 | 0.000224 | 30515164 |
| TOM22       | 3.889274 | 0.000967 | 3647650  |
| ARC15       | 3.889237 | 0.000947 | 3646043  |
| CAM1        | 3.872942 | 6.2E-06  | 3641734  |
| RPP1B       | 3.867547 | 0.000112 | 3643104  |
| C1_10680C_A | 3.853066 | 3.4E-05  | 3647678  |
| GAP2        | 3.844876 | 0.02963  | 3643662  |

|             |          |          |          |
|-------------|----------|----------|----------|
| RBD1        | 3.844434 | 4.48E-05 | 3642018  |
| PMT6        | 3.844429 | 4.81E-05 | 3641116  |
| C2_08340C_A | 3.841341 | 0.002947 | 3648165  |
| IFI3        | 3.836654 | 0.027568 | 3644694  |
| OCA6        | 3.836293 | 0.026123 | 3643336  |
| C1_02330C_A | 3.83489  | 4.65E-05 | 30514969 |
| NHX1        | 3.83099  | 4.19E-07 | 3647141  |
| PKH3        | 3.829527 | 3.5E-06  | 3646075  |
| CTA24       | 3.825295 | 4.38E-06 | 3636475  |
| GRS1        | 3.822235 | 6.5E-06  | 3642474  |
| CR_04330W_A | 3.821829 | 0.001852 | 3640997  |
| C2_04410W_A | 3.820994 | 0.002527 | 3645455  |
| SOD2        | 3.817728 | 0.0003   | 3640231  |
| TLO34       | 3.811486 | 0.00067  | 3648392  |
| ECM4        | 3.810959 | 0.000136 | 3640144  |
| COQ3        | 3.80776  | 0.002051 | 3641630  |
| ZCF32       | 3.806897 | 0.003626 | 3635213  |
| C3_07820W_A | 3.806005 | 0.003865 | 3647463  |
| BET2        | 3.805733 | 0.002452 | 3639025  |
| C2_03890W_A | 3.805478 | 0.014939 | 3637396  |
| C1_11120C_A | 3.802738 | 0.000122 | 3644412  |
| C3_00050C_A | 3.795505 | 0.000835 | 3640570  |
| PGA14       | 3.793265 | 6.56E-08 | 3641560  |
| C1_13270W_A | 3.783587 | 0.008488 | 3636144  |
| C6_00920W_A | 3.783026 | 0.000241 | 3644031  |
| NIP100      | 3.779941 | 2.56E-05 | 3640970  |
| TRP99       | 3.771601 | 0.000678 | 3642494  |
| HGT10       | 3.770918 | 0.008434 | 3640309  |
| C6_02030C_A | 3.762159 | 0.000549 | 3647562  |
| CR_05900W_A | 3.755184 | 0.016682 | 3646681  |
| C2_01320W_A | 3.74303  | 0.001677 | 3638846  |
| CR_07570W_A | 3.742312 | 0.003801 | 3648004  |
| BNI4        | 3.737514 | 7.21E-05 | 3646406  |
| CR_08050C_A | 3.730794 | 6.1E-05  | 3644133  |
| C1_12660W_A | 3.726345 | 0.001475 | 3646835  |
| C3_01210C_A | 3.711165 | 7E-05    | 3636612  |
| PRS         | 3.706252 | 0.032332 | 3640100  |
| C4_03810W_A | 3.704038 | 0.002071 | 3645350  |
| CNB1        | 3.703475 | 0.001526 | 3636463  |
| VAC8        | 3.689247 | 5.92E-05 | 3647410  |
| UBC15       | 3.676932 | 0.002271 | 3641260  |
| YKU80       | 3.674114 | 0.002243 | 3645138  |
| KIP4        | 3.672999 | 0.000155 | 3642032  |
| C7_04310C_A | 3.669927 | 0.000248 | 3643141  |
| GPR1        | 3.659723 | 9.27E-05 | 3642616  |
| FAA21       | 3.656748 | 0.003898 | 3638418  |
| SWC4        | 3.655896 | 0.000181 | 3639679  |

|             |          |          |          |
|-------------|----------|----------|----------|
| C4_04180C_A | 3.655798 | 0.015976 | 3641183  |
| C2_01170C_A | 3.652625 | 9.16E-05 | 3638860  |
| C2_03290W_A | 3.644806 | 0.002473 | 3637429  |
| CSP37       | 3.637734 | 0.000367 | 3640098  |
| RPS7A       | 3.637685 | 2.06E-05 | 3636573  |
| OSM2        | 3.626695 | 0.000578 | 3636193  |
| C7_03480W_A | 3.624646 | 0.000102 | 3646230  |
| C3_01180C_A | 3.620771 | 0.00011  | 3647960  |
| SER1        | 3.617534 | 0.003014 | 3646909  |
| CDC68       | 3.611194 | 2.47E-05 | 3642787  |
| CR_08620C_A | 3.598679 | 0.001203 | 3642110  |
| LAP3        | 3.592404 | 0.000208 | 3641012  |
| C5_02750C_A | 3.589237 | 0.000249 | 3637740  |
| RAP1        | 3.585575 | 0.002912 | 3643945  |
| C2_01160W_A | 3.582423 | 0.008763 | 3638861  |
| DAO1        | 3.579042 | 0.000205 | 3636885  |
| GPA2        | 3.576969 | 2.01E-05 | 3636638  |
| SRV2        | 3.575147 | 3.49E-06 | 3640938  |
| C1_05390C_A | 3.569554 | 0.000153 | 3642479  |
| C7_02670W_A | 3.569375 | 0.01157  | 3647651  |
| C1_04190C_A | 3.56702  | 0.006182 | 3644717  |
| VMA4        | 3.56666  | 5.87E-06 | 3640111  |
| CR_08640C_A | 3.564494 | 6.33E-06 | 3642112  |
| ERG1        | 3.556978 | 0.000568 | 3646509  |
| PGA56       | 3.555664 | 6.2E-06  | 30515313 |
| COX8        | 3.547955 | 3.61E-05 | 30515130 |
| PSY2        | 3.545886 | 0.002589 | 3644567  |
| C2_01340W_A | 3.543209 | 3.41E-07 | 3638844  |
| C3_05410W_A | 3.534885 | 7.16E-06 | 3643665  |
| ECI1        | 3.526825 | 0.001004 | 3642128  |
| CR_08900C_A | 3.523948 | 0.001427 | 3641908  |
| CR_07370W_A | 3.521063 | 0.00248  | 3646053  |
| C5_03870C_A | 3.520609 | 0.000745 | 3647223  |
| C7_03660C_A | 3.518391 | 8.4E-06  | 3646226  |
| REV3        | 3.510597 | 0.000753 | 3641749  |
| C3_01720C_A | 3.504002 | 1.37E-05 | 3636601  |
| VPS8        | 3.496641 | 0.003503 | 3640534  |
| C1_08680C_A | 3.490749 | 0.001024 | 3634933  |
| CDC14       | 3.479508 | 5.72E-06 | 3647132  |
| C6_00190W_A | 3.477053 | 0.000923 | 3646080  |
| CYB2        | 3.476422 | 0.00127  | 3636213  |
| THS1        | 3.473689 | 3.9E-07  | 3647882  |
| C6_02470W_A | 3.472994 | 0.000865 | 3639169  |
| SEC72       | 3.466085 | 0.004001 | 3645768  |
| C7_04280C_A | 3.463417 | 0.000228 | 3643173  |
| C1_11140W_A | 3.46061  | 0.000197 | 3644410  |
| C1_04620W_A | 3.456499 | 1.41E-05 | 3646135  |

|             |          |          |          |
|-------------|----------|----------|----------|
| C3_06990W_A | 3.455128 | 0.024316 | 3638521  |
| PIKA        | 3.452542 | 0.000284 | 3643765  |
| MSO1        | 3.450547 | 0.000352 | 3642040  |
| CR_02410W_A | 3.447761 | 0.002903 | 3644928  |
| CR_06790C_A | 3.444206 | 0.003277 | 3647311  |
| RFC1        | 3.44162  | 6.88E-06 | 3645582  |
| C1_02490C_A | 3.437756 | 0.002697 | 3636853  |
| C6_03820C_A | 3.425723 | 0.001708 | 3640288  |
| CR_03460W_A | 3.409383 | 0.002633 | 3643213  |
| DQD1        | 3.408087 | 0.004106 | 3643488  |
| C5_02060W_A | 3.405756 | 0.026258 | 3643748  |
| NUP159      | 3.405065 | 6.33E-05 | 3647458  |
| HAT2        | 3.403269 | 0.000308 | 3645973  |
| C3_03080W_A | 3.396016 | 0.010938 | 3638397  |
| ECM25       | 3.395673 | 0.011327 | 3636148  |
| MUQ1        | 3.392705 | 0.000136 | 3638898  |
| ASR1        | 3.389962 | 0.001935 | 3644402  |
| NPL4        | 3.389607 | 0.006538 | 3639820  |
| ASR3        | 3.389479 | 1.47E-05 | 3637402  |
| GLG2        | 3.388198 | 0.000313 | 3642282  |
| C3_07740W_A | 3.386619 | 7.86E-06 | 3638453  |
| YBN5        | 3.386117 | 4.52E-05 | 3644781  |
| FAS1        | 3.378811 | 4.21E-05 | 3641593  |
| GYP2        | 3.375667 | 5.88E-06 | 3641780  |
| CSA1        | 3.371579 | 2.8E-05  | 3638009  |
| DBF2        | 3.367836 | 0.002789 | 3648101  |
| PPH21       | 3.362792 | 2.29E-05 | 3636665  |
| ALT1        | 3.360109 | 2.34E-05 | 3638307  |
| C1_08930C_A | 3.355802 | 0.028058 | 30515031 |
| C6_03580W_A | 3.355461 | 0.026934 | 3640250  |
| C1_04090C_A | 3.355445 | 0.027102 | 3644697  |
| GLX3        | 3.350211 | 3.97E-05 | 3638325  |
| C1_14180W_A | 3.346338 | 0.001417 | 3643324  |
| MAC1        | 3.34549  | 0.002424 | 3637985  |
| C6_02740W_A | 3.344401 | 0.000819 | 3639216  |
| PHB1        | 3.338354 | 0.001227 | 3645641  |
| ARA1        | 3.33517  | 0.00755  | 3642331  |
| C1_10960W_A | 3.327541 | 0.014001 | 30515047 |
| MRV2        | 3.318585 | 0.005275 | 3636545  |
| C2_02530W_A | 3.316342 | 0.019367 | 3635819  |
| SCS7        | 3.316141 | 0.000336 | 3641157  |
| C3_01820W_A | 3.314686 | 0.00018  | 3636584  |
| CR_10600C_A | 3.314028 | 5.47E-06 | 3639004  |
| C7_04120W_A | 3.305511 | 0.028458 | 3643132  |
| C2_01930C_A | 3.295104 | 0.001587 | 3635793  |
| IFK2        | 3.29271  | 0.013289 | 3637439  |
| TOM70       | 3.282168 | 1.15E-05 | 3647645  |

|             |          |          |          |
|-------------|----------|----------|----------|
| YRB1        | 3.278314 | 4.89E-05 | 3639663  |
| RAD16       | 3.277083 | 7.27E-05 | 3636874  |
| C7_02540W_A | 3.276698 | 0.000829 | 3636939  |
| HOG1        | 3.27095  | 1.02E-05 | 3637393  |
| PTC6        | 3.255584 | 0.004775 | 3647351  |
| SEC1        | 3.252543 | 6.47E-06 | 3636935  |
| ETR1        | 3.24874  | 0.000111 | 3640561  |
| C6_01370W_A | 3.240681 | 0.003771 | 3641607  |
| LRG1        | 3.240428 | 1.43E-05 | 3639727  |
| C7_00520W_A | 3.236716 | 4.53E-06 | 3638001  |
| C7_03840W_A | 3.234379 | 0.00719  | 3643146  |
| CR_10290C_A | 3.229077 | 1.65E-05 | 3638935  |
| PRO3        | 3.221189 | 0.000228 | 3645036  |
| C7_03260C_A | 3.217917 | 0.021215 | 3641366  |
| C1_02510W_A | 3.21344  | 0.016314 | 3636796  |
| OPT4        | 3.212168 | 0.000643 | 3647697  |
| HGT7        | 3.211676 | 0.000247 | 3638876  |
| MPH1        | 3.210283 | 0.001602 | 3642817  |
| ALG2        | 3.20921  | 0.001217 | 3647832  |
| ISC1        | 3.205315 | 0.033562 | 3646705  |
| EIF4E       | 3.204172 | 1.36E-05 | 3638981  |
| C1_10730W_A | 3.198298 | 0.004517 | 3644404  |
| PHB2        | 3.196052 | 0.000199 | 3635238  |
| C7_02100W_A | 3.188891 | 0.00016  | 3637023  |
| OCH1        | 3.187584 | 0.001167 | 3641751  |
| C4_02160C_A | 3.185818 | 0.000764 | 3635668  |
| SRO77       | 3.185674 | 2.31E-05 | 3646088  |
| C4_02470C_A | 3.184394 | 0.000754 | 3637869  |
| TAF14       | 3.176963 | 4.25E-05 | 3637357  |
| C1_11430W_A | 3.17104  | 0.009218 | 3644541  |
| C1_07630W_A | 3.168623 | 0.004146 | 3646660  |
| SHM1        | 3.163064 | 2.12E-05 | 3646724  |
| C7_01160C_A | 3.162505 | 0.0106   | 30515351 |
| C1_11920W_A | 3.156991 | 0.001502 | 3642003  |
| C3_05300C_A | 3.15665  | 0.039651 | 3643646  |
| C2_08270C_A | 3.152112 | 0.00417  | 3642347  |
| C2_00510W_A | 3.150123 | 0.000774 | 3638868  |
| C6_03330C_A | 3.141227 | 0.010957 | 3639199  |
| FAT1        | 3.139492 | 0.000566 | 3647083  |
| C3_00610W_A | 3.137142 | 0.011549 | 3640578  |
| C1_02060W_A | 3.134742 | 0.015022 | 30514968 |
| GDA1        | 3.13403  | 0.000186 | 3641762  |
| SAH1        | 3.133728 | 6.02E-05 | 3636452  |
| MED18       | 3.130284 | 0.005572 | 3644103  |
| ALG7        | 3.127835 | 0.003357 | 3642291  |
| C5_01420W_A | 3.127588 | 0.007638 | 3647055  |
| C3_06860C_A | 3.126708 | 0.0012   | 3638541  |

|             |          |          |          |
|-------------|----------|----------|----------|
| EMP70       | 3.125082 | 0.00011  | 3637919  |
| C2_07440C_A | 3.121402 | 0.004627 | 3645200  |
| C1_11100W_A | 3.120975 | 0.017952 | 3644414  |
| CR_05450C_A | 3.11854  | 0.018808 | 3648236  |
| CYP5        | 3.116939 | 0.000231 | 3642257  |
| C3_04810C_A | 3.116392 | 0.000259 | 30515205 |
| IFR2        | 3.114855 | 2.18E-05 | 3645100  |
| C4_00590C_A | 3.114125 | 4.84E-05 | 3645772  |
| CDC27       | 3.113826 | 0.004657 | 3640405  |
| MSK1        | 3.111616 | 0.007894 | 3637032  |
| C1_07360W_A | 3.110925 | 0.000148 | 3644470  |
| C1_14050C_A | 3.105766 | 0.001337 | 3643343  |
| PPE1        | 3.105704 | 0.0397   | 3635802  |
| C1_05990C_A | 3.105596 | 0.037263 | 3639871  |
| RNA1        | 3.099599 | 0.000374 | 3636595  |
| C6_04560W_A | 3.073811 | 0.000225 | 3645977  |
| C4_05220C_A | 3.063535 | 0.013823 | 3646155  |
| C7_00790W_A | 3.062971 | 0.000702 | 3637943  |
| RPS8A       | 3.059458 | 0.000617 | 3645565  |
| C4_02100C_A | 3.058593 | 0.020556 | 3635641  |
| ARG2        | 3.055629 | 0.037674 | 3647533  |
| POL32       | 3.054684 | 0.001352 | 3639881  |
| RPS1        | 3.054059 | 0.000631 | 3636924  |
| CDC13       | 3.05213  | 0.006299 | 3639293  |
| VPS52       | 3.050577 | 0.004963 | 3638996  |
| C1_09070W_A | 3.050328 | 0.000683 | 3634773  |
| LPD1        | 3.045824 | 0.000993 | 3646037  |
| RPL19A      | 3.043524 | 0.000615 | 3635257  |
| SAM4        | 3.041541 | 0.000353 | 3646506  |
| PNP1        | 3.038759 | 0.000791 | 3638426  |
| ERG8        | 3.035579 | 0.002625 | 3635640  |
| TMA19       | 3.032546 | 5.71E-05 | 3640399  |
| C2_04330C_A | 3.03211  | 0.004386 | 3645453  |
| C2_00830C_A | 3.027173 | 0.001163 | 3638808  |
| RPD31       | 3.017315 | 0.000424 | 3638520  |
| C2_09830C_A | 3.009902 | 0.008287 | 30515161 |
| C3_03840C_A | 3.009684 | 0.006936 | 3645628  |
| C3_04130W_A | 3.007481 | 0.000782 | 3635283  |
| C4_03320W_A | 3.002001 | 0.001909 | 3648092  |
| ARF2        | 3.001889 | 2.49E-05 | 3635271  |
| C1_10320W_A | 3.000163 | 0.00665  | 3634907  |
| ANP1        | 2.993478 | 0.006079 | 3643917  |
| C4_01730C_A | 2.988608 | 0.002325 | 3635588  |
| C4_01020C_A | 2.983102 | 0.000465 | 3635606  |
| NIT3        | 2.981871 | 0.005561 | 3644408  |
| VAN1        | 2.980793 | 2.64E-05 | 3638527  |
| MNN9        | 2.977404 | 0.001409 | 3641735  |

|             |          |          |          |
|-------------|----------|----------|----------|
| SFI1        | 2.975184 | 0.000825 | 3641385  |
| C1_11600W_A | 2.973703 | 0.007572 | 3645346  |
| C2_07270W_A | 2.96383  | 0.017094 | 3643474  |
| GLR1        | 2.963775 | 6.39E-05 | 3647061  |
| C6_00240C_A | 2.956753 | 0.002669 | 3646062  |
| RPP1A       | 2.95519  | 9.37E-05 | 3636839  |
| RAV2        | 2.950486 | 0.015219 | 3639252  |
| C5_03170C_A | 2.945769 | 0.00045  | 3637801  |
| C3_03760W_A | 2.943335 | 0.001088 | 3645638  |
| C5_03490C_A | 2.94151  | 0.000871 | 3646967  |
| C2_02870W_A | 2.935136 | 0.005729 | 3642972  |
| MDM10       | 2.932898 | 0.019151 | 3647778  |
| XKS1        | 2.932845 | 0.00011  | 3648306  |
| BMT6        | 2.931786 | 5.21E-05 | 3639258  |
| ALG11       | 2.929368 | 0.032107 | 3645871  |
| CR_05860W_A | 2.927665 | 0.003989 | 3646703  |
| MIR1        | 2.921335 | 0.001369 | 3634782  |
| C5_04710W_A | 2.916394 | 0.017538 | 3636517  |
| CR_06740W_A | 2.911768 | 0.000749 | 3646616  |
| FDH1        | 2.907433 | 0.038993 | 3646398  |
| PTC7        | 2.898112 | 0.00066  | 3645000  |
| C3_01890C_A | 2.894953 | 8.26E-06 | 3636561  |
| CR_09090C_A | 2.891538 | 0.030765 | 3641927  |
| IPK1        | 2.889815 | 0.013454 | 3648091  |
| SLC1        | 2.888578 | 0.003613 | 3638324  |
| C1_01360C_A | 2.880568 | 0.000532 | 3640191  |
| C1_00320W_A | 2.875021 | 0.02267  | 3639297  |
| LYS21       | 2.873363 | 0.001101 | 3644763  |
| HPC2        | 2.868078 | 0.002298 | 3636188  |
| PMR1        | 2.865336 | 0.00082  | 3638043  |
| TRP3        | 2.865257 | 0.007742 | 3642035  |
| CR_06260W_A | 2.859176 | 0.007243 | 3644853  |
| CR_03600C_A | 2.85686  | 0.001209 | 3643207  |
| SET3        | 2.851267 | 6.83E-05 | 3643320  |
| C2_07390C_A | 2.84806  | 0.000384 | 3645229  |
| LIP8        | 2.847004 | 0.025937 | 3646727  |
| CR_00350W_A | 2.846955 | 0.00011  | 3639686  |
| VPS35       | 2.845576 | 0.000787 | 3645567  |
| C1_01930W_A | 2.844596 | 8.06E-06 | 30514966 |
| SEN1        | 2.844089 | 6.66E-05 | 3635255  |
| AIP2        | 2.842651 | 0.000138 | 3638393  |
| RPL20B      | 2.841189 | 5.57E-05 | 3635615  |
| C2_00320W_A | 2.838597 | 0.002851 | 3638798  |
| C2_01250W_A | 2.837343 | 0.00617  | 3638793  |
| CHS7        | 2.823268 | 0.006491 | 3639869  |
| MED1        | 2.818774 | 0.00811  | 3637418  |
| POB3        | 2.818537 | 0.000402 | 3635827  |



|             |          |          |          |
|-------------|----------|----------|----------|
| ARP8        | 2.816985 | 0.000365 | 3640200  |
| C6_00080C_A | 2.816018 | 0.022344 | 3647899  |
| GRE3        | 2.810223 | 0.000346 | 3637811  |
| CR_06560C_A | 2.80088  | 0.002517 | 3648367  |
| RLM1        | 2.797925 | 9.01E-05 | 3635703  |
| ACP1        | 2.795304 | 0.001361 | 3639825  |
| RPL18       | 2.789875 | 3.12E-05 | 3635156  |
| GOR1        | 2.785252 | 0.029977 | 3636836  |
| GLO2        | 2.780477 | 0.035916 | 3644067  |
| CR_00290W_A | 2.779666 | 0.001376 | 3639717  |
| C1_07060C_A | 2.77888  | 0.028908 | 30515018 |
| YHM1        | 2.778117 | 0.007537 | 3644535  |
| CSE4        | 2.777437 | 0.033621 | 3647750  |
| EFB1        | 2.776631 | 0.000172 | 3641125  |
| C7_00250C_A | 2.776086 | 0.001816 | 3637979  |
| CR_10020C_A | 2.776017 | 0.030194 | 3639032  |
| C1_14040W_A | 2.771837 | 0.001257 | 3643342  |
| CR_02770C_A | 2.771461 | 0.028498 | 3642581  |
| C4_02040W_A | 2.767539 | 0.036405 | 3635649  |
| C2_02170W_A | 2.767183 | 0.004146 | 3635751  |
| PGA49       | 2.765506 | 0.01772  | 3646525  |
| C2_02390W_A | 2.764556 | 0.00364  | 3635829  |
| C4_05860W_A | 2.764508 | 0.034135 | 3641792  |
| C3_07770C_A | 2.76304  | 0.010728 | 3647457  |
| C1_01400C_A | 2.758703 | 0.000511 | 3640237  |
| C3_06710W_A | 2.757685 | 0.000186 | 3638448  |
| C5_01550C_A | 2.753141 | 0.000359 | 3647063  |
| ILV1        | 2.750938 | 0.001296 | 3646918  |
| YPT7        | 2.745953 | 0.012884 | 3636864  |
| ENO1        | 2.7389   | 0.001762 | 3646493  |
| ARH2        | 2.736375 | 0.017271 | 3643411  |
| C2_00570W_A | 2.73319  | 0.000978 | 3638853  |
| HDA1        | 2.728646 | 0.001605 | 3640154  |
| VPH1        | 2.720264 | 1.26E-05 | 3646157  |
| STP1        | 2.710687 | 0.013798 | 3635152  |
| C4_06770W_A | 2.707862 | 0.00175  | 3642920  |
| RPS26A      | 2.703211 | 0.000239 | 3635787  |
| INO4        | 2.702646 | 0.011082 | 30515105 |
| C7_02470C_A | 2.701248 | 0.015197 | 3636945  |
| C5_01890W_A | 2.701106 | 0.00473  | 3643750  |
| C6_04110W_A | 2.697102 | 0.000114 | 3647834  |
| C1_09750W_A | 2.693804 | 0.008844 | 3634822  |
| GTT11       | 2.692615 | 0.012228 | 3645644  |
| RPL28       | 2.690607 | 0.000145 | 30515386 |
| MRP2        | 2.687466 | 0.011082 | 3636498  |
| C1_08490W_A | 2.684106 | 0.002119 | 3646492  |
| C6_03420W_A | 2.67556  | 0.040132 | 3639235  |

|             |          |          |          |
|-------------|----------|----------|----------|
| C1_09430W_A | 2.675219 | 0.000523 | 3634855  |
| C3_04360W_A | 2.672436 | 0.008336 | 3635276  |
| CR_05480W_A | 2.672037 | 0.000376 | 3648238  |
| RAC1        | 2.66753  | 0.000578 | 3639508  |
| TIP20       | 2.666597 | 0.001195 | 3636457  |
| TPO3        | 2.665503 | 0.005621 | 3634790  |
| C4_01780C_A | 2.663468 | 0.015466 | 3635582  |
| RPL10A      | 2.662723 | 0.000363 | 3645868  |
| C5_02400W_A | 2.659309 | 0.002213 | 3637724  |
| SCL1        | 2.657186 | 0.001301 | 3640510  |
| CR_09510C_A | 2.656307 | 0.004156 | 3647105  |
| C6_02630C_A | 2.655737 | 0.001523 | 3639221  |
| C3_03210W_A | 2.642794 | 0.042956 | 3638315  |
| CR_06520C_A | 2.642057 | 0.040663 | 3645263  |
| C7_00140C_A | 2.639314 | 0.016987 | 3637974  |
| ZDS1        | 2.639141 | 3.41E-05 | 3641103  |
| GCN4        | 2.63781  | 0.002916 | 3643823  |
| ZCF39       | 2.624747 | 0.001211 | 3639037  |
| C6_03880W_A | 2.620336 | 0.002656 | 3640293  |
| AGE1        | 2.617854 | 0.000299 | 3636913  |
| RPS16A      | 2.617707 | 0.0003   | 30514974 |
| CHC1        | 2.61434  | 0.003308 | 3647552  |
| SGT1        | 2.612834 | 0.000852 | 3644068  |
| MCM1        | 2.61152  | 0.001368 | 3638050  |
| C3_06810W_A | 2.610386 | 0.004109 | 3638545  |
| C2_05590C_A | 2.609704 | 0.011717 | 3645564  |
| C4_00780C_A | 2.609686 | 0.001601 | 3645759  |
| ARL3        | 2.609616 | 0.026704 | 3644397  |
| C7_03050W_A | 2.608942 | 0.029783 | 3641378  |
| HEM15       | 2.602201 | 0.000207 | 3645211  |
| MDL1        | 2.601667 | 0.003027 | 3640146  |
| LPT1        | 2.599277 | 0.00031  | 3645212  |
| CTN1        | 2.596601 | 0.024395 | 3645414  |
| TEF1        | 2.590409 | 0.001375 | 3648254  |
| GLO1        | 2.58475  | 0.005181 | 3639312  |
| C3_01950C_A | 2.576847 | 0.003952 | 3636599  |
| CR_02390W_A | 2.571096 | 0.000196 | 3644930  |
| USO1        | 2.570118 | 0.000613 | 3648280  |
| URA6        | 2.568727 | 0.001592 | 3647988  |
| CR_09750C_A | 2.564662 | 0.008203 | 3639009  |
| UGA33       | 2.56314  | 0.003128 | 3641886  |
| RPN7        | 2.560509 | 0.000316 | 3641909  |
| SIR2        | 2.553348 | 0.001191 | 3638845  |
| C4_04240C_A | 2.548489 | 0.001083 | 3646856  |
| C5_01350W_A | 2.548448 | 0.008893 | 3642640  |
| C2_06320W_A | 2.5479   | 0.000401 | 3646927  |
| APR1        | 2.544562 | 0.003015 | 3645204  |

|             |          |          |          |
|-------------|----------|----------|----------|
| C6_00850W_A | 2.543991 | 0.000566 | 3644010  |
| C2_05220C_A | 2.540928 | 0.002983 | 3643466  |
| MRE11       | 2.540369 | 0.00669  | 3645898  |
| C2_07220W_A | 2.540043 | 0.000328 | 3643483  |
| C7_02480W_A | 2.539572 | 0.02148  | 3636944  |
| VTC3        | 2.53787  | 0.000424 | 3643206  |
| ADP1        | 2.533328 | 0.000313 | 3642458  |
| C1_02240W_A | 2.532014 | 0.000566 | 3644597  |
| CDC55       | 2.529177 | 0.000214 | 3635785  |
| C1_05780W_A | 2.52678  | 0.001555 | 3639888  |
| AGO1        | 2.526707 | 0.003875 | 3642828  |
| YPT1        | 2.526398 | 9.22E-05 | 3636915  |
| C4_03080W_A | 2.524463 | 0.000244 | 3637928  |
| MEC1        | 2.523564 | 0.002436 | 3647733  |
| ZCF10       | 2.523338 | 0.010704 | 3643485  |
| C5_00580W_A | 2.523084 | 0.009421 | 3641588  |
| CST20       | 2.521127 | 0.003033 | 3637790  |
| C4_04090C_A | 2.519598 | 0.029205 | 3641225  |
| RPL17B      | 2.519334 | 8.38E-05 | 3645439  |
| C1_06360W_A | 2.516487 | 0.021402 | 3639561  |
| C5_00790C_A | 2.514568 | 0.001962 | 3644125  |
| SEO1        | 2.512646 | 0.040092 | 3646621  |
| RIM20       | 2.50932  | 0.001039 | 3634809  |
| SPE1        | 2.508967 | 0.003934 | 3639327  |
| C5_05440C_A | 2.505557 | 0.001713 | 3636431  |
| C1_14500C_A | 2.503911 | 0.0003   | 3643331  |
| C2_00350W_A | 2.49883  | 0.023412 | 3638827  |
| C2_10700C_A | 2.492655 | 0.019095 | 3641207  |
| RPP0        | 2.486215 | 0.006322 | 3638023  |
| CR_10590W_A | 2.485278 | 0.010055 | 3639003  |
| C3_00360W_A | 2.482034 | 0.007247 | 3640542  |
| CAS4        | 2.480486 | 0.000242 | 3636568  |
| C2_02700C_A | 2.47907  | 0.038438 | 3643005  |
| C1_12170C_A | 2.475751 | 0.011469 | 3642039  |
| CR_04120C_A | 2.475669 | 0.013184 | 3640972  |
| C4_03920W_A | 2.475538 | 0.011454 | 3648314  |
| C3_06350W_A | 2.474028 | 0.011927 | 30515215 |
| TKL1        | 2.47053  | 0.005769 | 3640767  |
| COQ6        | 2.469916 | 0.007053 | 3636878  |
| C2_08160C_A | 2.467435 | 0.002861 | 30515152 |
| GUK1        | 2.466457 | 0.020429 | 3647231  |
| CDC23       | 2.463993 | 0.012375 | 3642111  |
| CYS4        | 2.461851 | 0.0009   | 3645429  |
| CR_07840C_A | 2.456165 | 0.044581 | 3647346  |
| ATC1        | 2.454447 | 0.000495 | 3639570  |
| C7_00920C_A | 2.452069 | 0.018271 | 3637957  |
| CR_09190C_A | 2.4506   | 0.017763 | 3641885  |

|             |          |          |          |
|-------------|----------|----------|----------|
| C1_04980C_A | 2.445246 | 0.004482 | 3647529  |
| RBF1        | 2.444667 | 0.028696 | 3639251  |
| QCR9        | 2.442735 | 0.005215 | 30515251 |
| LCB4        | 2.441711 | 0.044836 | 3642057  |
| C3_00830C_A | 2.436145 | 0.019699 | 3647757  |
| C7_02170C_A | 2.434501 | 0.019598 | 3636993  |
| C1_02000W_A | 2.433334 | 0.016891 | 3645418  |
| FAA2-1      | 2.428813 | 0.016021 | 3644100  |
| C1_14200W_A | 2.420613 | 0.005372 | 3643301  |
| INO2        | 2.420341 | 0.018899 | 3639674  |
| CTA7        | 2.416892 | 0.019319 | 3637776  |
| APT1        | 2.416474 | 0.023556 | 3635842  |
| RPS30       | 2.416347 | 0.002721 | 30515390 |
| TUF1        | 2.409385 | 0.000292 | 3639360  |
| C3_03930W_A | 2.408028 | 0.006818 | 3645657  |
| C5_03140C_A | 2.404365 | 0.002596 | 3637798  |
| UGA11       | 2.401317 | 0.047352 | 3637437  |
| C7_03370C_A | 2.400707 | 0.003387 | 3646720  |
| C1_12920C_A | 2.399331 | 0.017002 | 3636155  |
| C4_04760C_A | 2.38734  | 0.004699 | 3641118  |
| CCP1        | 2.385928 | 0.000696 | 3638350  |
| RPS13       | 2.383632 | 0.002125 | 30515328 |
| CR_10500C_A | 2.383085 | 0.016195 | 3638982  |
| CDC45       | 2.381867 | 0.025392 | 3648293  |
| C1_00310W_A | 2.3777   | 0.003291 | 3639298  |
| PKC1        | 2.373145 | 0.000309 | 3635210  |
| C2_05570C_A | 2.370839 | 0.035156 | 3645562  |
| C1_03960C_A | 2.369526 | 0.011845 | 3646418  |
| C4_06740C_A | 2.369238 | 0.000322 | 3642923  |
| SCW11       | 2.358001 | 0.014244 | 3636521  |
| TOM40       | 2.357534 | 0.000588 | 3636968  |
| DBP5        | 2.355492 | 0.000609 | 3636564  |
| C1_04560W_A | 2.353783 | 0.034613 | 3646130  |
| HMO1        | 2.353708 | 0.00796  | 3646685  |
| HEM2        | 2.350412 | 0.015005 | 3637428  |
| C7_02780W_A | 2.350248 | 0.001466 | 3641361  |
| UBP13       | 2.348769 | 0.001152 | 3638879  |
| C6_03620C_A | 2.345931 | 0.019219 | 3640297  |
| ERG20       | 2.344676 | 0.003932 | 3645440  |
| FLC2        | 2.344403 | 0.001379 | 3647962  |
| C3_04800C_A | 2.339118 | 0.023177 | 3635216  |
| C5_03980W_A | 2.331196 | 0.001709 | 3647442  |
| C1_11850W_A | 2.329674 | 0.010082 | 3642010  |
| RPS14B      | 2.329142 | 0.001646 | 30515006 |
| PRO2        | 2.327344 | 0.017166 | 3638532  |
| C7_02370W_A | 2.326603 | 0.001882 | 3636930  |
| HXK1        | 2.325529 | 0.001039 | 3645964  |

|             |          |          |          |
|-------------|----------|----------|----------|
| YPD1        | 2.321842 | 0.010419 | 3644458  |
| YKT6        | 2.319631 | 0.007306 | 3636863  |
| SWD2        | 2.315203 | 0.028392 | 3646677  |
| C3_07850W_A | 2.306429 | 0.006101 | 3647466  |
| FLC3        | 2.305409 | 0.009387 | 3642322  |
| C3_02090C_A | 2.298909 | 0.017435 | 3636661  |
| SHM2        | 2.298457 | 0.001523 | 3640306  |
| CHK1        | 2.295782 | 0.008516 | 3637394  |
| C1_03690W_A | 2.294966 | 0.003529 | 3648426  |
| PST3        | 2.281281 | 0.011541 | 3648031  |
| C4_05810W_A | 2.277296 | 0.005829 | 3641786  |
| PGI1        | 2.275136 | 0.009455 | 3644847  |
| DPS1-1      | 2.272918 | 0.008963 | 3645134  |
| CR_03860C_A | 2.272164 | 0.020464 | 3643186  |
| GPM1        | 2.270917 | 0.01376  | 3637431  |
| C2_08900W_A | 2.264392 | 0.030447 | 30515156 |
| GCV3        | 2.263309 | 0.002283 | 3636194  |
| OPT2        | 2.263187 | 0.037285 | 3644915  |
| PEX7        | 2.259959 | 0.034911 | 3644027  |
| C2_03900C_A | 2.258591 | 0.00291  | 3637395  |
| LYS2        | 2.251576 | 0.004463 | 3636875  |
| AVT7        | 2.250765 | 0.005792 | 3637433  |
| C3_02970C_A | 2.247117 | 0.03274  | 3638385  |
| C4_06660W_A | 2.240882 | 0.004911 | 3642809  |
| C5_01880C_A | 2.240426 | 0.025166 | 3643751  |
| RPL35       | 2.237334 | 0.001231 | 30515207 |
| C1_07050C_A | 2.236752 | 0.034734 | 3639532  |
| GRP2        | 2.235692 | 0.002823 | 3637744  |
| DCW1        | 2.234867 | 0.001443 | 3638842  |
| FGR24       | 2.22795  | 0.02398  | 3643288  |
| RPN8        | 2.226971 | 0.00144  | 3643770  |
| CR_04390C_A | 2.223576 | 0.007479 | 3640980  |
| KEL1        | 2.2211   | 0.001107 | 3639318  |
| PCT1        | 2.216248 | 0.003062 | 3645743  |
| GRE2        | 2.215652 | 0.034344 | 3648026  |
| MDG1        | 2.200112 | 0.007195 | 3643311  |
| C6_02410W_A | 2.199358 | 0.008704 | 3645884  |
| C4_02620C_A | 2.199076 | 0.019753 | 3637834  |
| C6_03470W_A | 2.197888 | 0.020227 | 3640253  |
| GAL10       | 2.196692 | 0.01558  | 3644583  |
| C4_07200C_A | 2.192723 | 0.006883 | 3642958  |
| NAT2        | 2.189976 | 0.01411  | 3638837  |
| SRT1        | 2.189426 | 0.049719 | 3642020  |
| RCE1        | 2.189322 | 0.048666 | 3641104  |
| C2_10460C_A | 2.188761 | 0.008852 | 3641195  |
| CR_06620W_A | 2.187579 | 0.030436 | 3646631  |
| PRC3        | 2.184552 | 0.013244 | 3639889  |

|             |          |          |         |
|-------------|----------|----------|---------|
| AVT4        | 2.179325 | 0.012497 | 3645316 |
| PRE2        | 2.174669 | 0.006722 | 3643490 |
| CMK1        | 2.171886 | 0.00068  | 3635263 |
| CR_10510W_A | 2.171393 | 0.035328 | 3639039 |
| C4_06130W_A | 2.168932 | 0.013346 | 3648085 |
| CR_08980C_A | 2.168482 | 0.049369 | 3641890 |
| SAC6        | 2.162703 | 0.004892 | 3639213 |
| C2_07190C_A | 2.156871 | 0.03729  | 3643513 |
| HAC1        | 2.156093 | 0.010573 | 3639849 |
| VPS33       | 2.154607 | 0.04936  | 3647477 |
| STB5        | 2.153888 | 0.011247 | 3640208 |
| C6_02810C_A | 2.153658 | 0.014249 | 3639248 |
| C1_06190C_A | 2.15135  | 0.013761 | 3648391 |
| C1_02410C_A | 2.150278 | 0.042061 | 3636793 |
| C3_01280W_A | 2.149906 | 0.037689 | 3636623 |
| COX13       | 2.148684 | 0.00664  | 3635784 |
| C2_05580W_A | 2.145941 | 0.015802 | 3645563 |
| PTC4        | 2.143342 | 0.016277 | 3646697 |
| POM152      | 2.141636 | 0.002147 | 3638812 |
| RAD32       | 2.140719 | 0.039117 | 3637340 |
| HST1        | 2.140163 | 0.030452 | 3634770 |
| CHS5        | 2.138387 | 0.005667 | 3637333 |
| SMT3        | 2.136031 | 0.00257  | 3644550 |
| TERT        | 2.13229  | 0.021962 | 3640729 |
| C5_02500C_A | 2.130572 | 0.010427 | 3637766 |
| C2_07810W_A | 2.125294 | 0.035282 | 3642324 |
| C2_10630W_A | 2.125243 | 0.035    | 3641248 |
| C1_04860W_A | 2.124219 | 0.002983 | 3644784 |
| GBP2        | 2.123221 | 0.00762  | 3637992 |
| C3_06970W_A | 2.119457 | 0.042015 | 3638506 |
| SLA1        | 2.117103 | 0.001682 | 3635739 |
| CTA26       | 2.113977 | 0.017468 | 3638965 |
| MNN15       | 2.112243 | 0.045482 | 3644794 |
| SBP1        | 2.111041 | 0.019906 | 3635280 |
| C1_04490W_A | 2.110735 | 0.007176 | 3646145 |
| PHO88       | 2.108527 | 0.027883 | 3641898 |
| C1_14310W_A | 2.107769 | 0.029245 | 3643315 |
| C2_08100W_A | 2.103176 | 0.005166 | 3642334 |
| SAC7        | 2.101809 | 0.00541  | 3638010 |
| ADE5,7      | 2.100093 | 0.010549 | 3640719 |
| AAT21       | 2.099277 | 0.002222 | 3647241 |
| C1_05980W_A | 2.099231 | 0.021391 | 3639872 |
| GDI1        | 2.09872  | 0.023288 | 3643298 |
| VPS11       | 2.098386 | 0.017826 | 3646524 |
| C6_02680W_A | 2.092319 | 0.046449 | 3639226 |
| C1_13810W_A | 2.087072 | 0.013265 | 3636126 |
| ADH5        | 2.084467 | 0.012731 | 3640156 |

|             |          |          |          |
|-------------|----------|----------|----------|
| C1_14090W_A | 2.076965 | 0.031644 | 30515079 |
| C2_01390W_A | 2.072349 | 0.018279 | 3635726  |
| HYM1        | 2.072104 | 0.043669 | 3637355  |
| CDC53       | 2.071981 | 0.004602 | 3636603  |
| KIN2        | 2.071864 | 0.003682 | 3639697  |
| ARO2        | 2.067094 | 0.017788 | 3648190  |
| FRS1        | 2.062781 | 0.003191 | 3640121  |
| MSI3        | 2.058934 | 0.018533 | 3639821  |
| C1_12530C_A | 2.056179 | 0.044018 | 3647608  |
| C6_02310W_A | 2.055208 | 0.025459 | 3645875  |
| CR_06640C_A | 2.052849 | 0.003938 | 3646619  |
| CAN3        | 2.052116 | 0.001179 | 3647066  |
| RPL37B      | 2.05114  | 0.009589 | 30515053 |
| C1_10920W_A | 2.049346 | 0.049163 | 3644433  |
| VPS16       | 2.048449 | 0.013905 | 3646150  |
| CR_01820W_A | 2.04508  | 0.012927 | 3640164  |
| SMP2        | 2.044214 | 0.002777 | 3635779  |
| CCT5        | 2.043739 | 0.011864 | 3643478  |
| AHP1        | 2.042735 | 0.023109 | 3637850  |
| C4_00170W_A | 2.036743 | 0.013523 | 3645028  |
| RBP1        | 2.036234 | 0.014852 | 3647647  |
| C7_00910C_A | 2.027274 | 0.032239 | 3637958  |
| CR_01420W_A | 2.025221 | 0.005838 | 3640137  |
| C1_08690W_A | 2.023705 | 0.042687 | 3634934  |
| TIP41       | 2.023705 | 0.042756 | 3636506  |
| C7_02560W_A | 2.016769 | 0.041522 | 3637016  |
| C5_01220W_A | 2.012453 | 0.024323 | 3642620  |
| CR_07340C_A | 2.012425 | 0.024369 | 3646056  |
| NAT4        | 2.010573 | 0.01544  | 3635704  |
| CDC15       | 2.008938 | 0.01656  | 3643459  |
| C2_05760C_A | 2.008867 | 0.023652 | 3645578  |
| NGG1        | 2.005563 | 0.02095  | 3636902  |
| C1_02430C_A | 2.004108 | 0.025739 | 3636846  |
| CHS3        | 2.000365 | 0.02159  | 3636199  |
| C2_00360C_A | -2.00127 | 0.004811 | 3638825  |
| ATO2        | -2.00165 | 0.036644 | 3639845  |
| CWT1        | -2.00751 | 0.003204 | 3647595  |
| ADA2        | -2.01256 | 0.005489 | 3644450  |
| MSN5        | -2.01585 | 0.023015 | 3637889  |
| STD1        | -2.01864 | 0.006034 | 3647459  |
| TIM50       | -2.03224 | 0.004778 | 3644530  |
| FGR15       | -2.03397 | 0.01016  | 3638882  |
| IFM3        | -2.03502 | 0.041371 | 3642335  |
| GUT1        | -2.03652 | 0.004365 | 3648082  |
| ESA1        | -2.03774 | 0.004689 | 3640518  |
| C1_14250C_A | -2.03935 | 0.00122  | 3643307  |
| SUI2        | -2.04384 | 0.006423 | 3639569  |

|             |          |          |          |
|-------------|----------|----------|----------|
| C4_03110W_A | -2.04512 | 0.011536 | 3637924  |
| C6_03910C_A | -2.04767 | 0.032886 | 3640263  |
| C4_00060W_A | -2.04889 | 0.005866 | 3648061  |
| HNM3        | -2.04899 | 0.049315 | 3640093  |
| ADAEC       | -2.05011 | 0.006705 | 3637342  |
| CRL1        | -2.05249 | 0.009313 | 3640238  |
| HSE1        | -2.05871 | 0.004313 | 3640407  |
| ARG4        | -2.05996 | 0.030189 | 3646237  |
| GPM2        | -2.07314 | 0.023902 | 3644713  |
| ZCF27       | -2.07327 | 0.036046 | 3635631  |
| CR_04140W_A | -2.0737  | 0.016617 | 3640974  |
| TIF4631     | -2.07521 | 0.000351 | 3643880  |
| ASH1        | -2.07842 | 0.019653 | 3641249  |
| C1_12820C_A | -2.08078 | 0.024945 | 3646826  |
| C3_02900W_A | -2.08363 | 0.023488 | 3638337  |
| AFT2        | -2.08435 | 0.008838 | 3643511  |
| SKN2        | -2.08901 | 0.021673 | 3638309  |
| ECM3        | -2.08933 | 0.007006 | 3635754  |
| PGA25       | -2.09409 | 0.013203 | 3647890  |
| CPH2        | -2.09659 | 0.027393 | 3646067  |
| C1_13720W_A | -2.09764 | 0.030779 | 3636134  |
| C1_04960C_A | -2.09971 | 0.028421 | 3647527  |
| GRR1        | -2.10066 | 0.001197 | 3636392  |
| MRPL8       | -2.10779 | 0.018303 | 3646039  |
| CR_00370W_A | -2.11157 | 0.012565 | 3639684  |
| C2_03560C_A | -2.11161 | 0.005421 | 3637337  |
| C1_12350W_A | -2.11166 | 0.003728 | 3642063  |
| BRG1        | -2.11508 | 0.04739  | 3647664  |
| IFE2        | -2.11638 | 0.013329 | 3648027  |
| C5_05140W_A | -2.12416 | 0.008804 | 3636460  |
| CR_02590C_A | -2.12472 | 0.016639 | 3642595  |
| C3_05950W_A | -2.12495 | 0.043656 | 3641728  |
| SMX4        | -2.12821 | 0.043985 | 30515427 |
| PRP45       | -2.12824 | 0.040722 | 3639166  |
| C2_06780C_A | -2.12847 | 0.020839 | 3643516  |
| C1_01820C_A | -2.12856 | 0.01583  | 3645435  |
| C1_00270W_A | -2.13587 | 0.007201 | 3639300  |
| C1_01710W_A | -2.13815 | 0.003514 | 3640201  |
| SLU7        | -2.1391  | 0.023042 | 3638501  |
| C4_01220C_A | -2.13911 | 0.024223 | 3635650  |
| C2_00770W_A | -2.14451 | 0.008882 | 3638909  |
| FAA2        | -2.1449  | 0.01021  | 3641731  |
| SSN6        | -2.14875 | 0.003896 | 3638518  |
| CR_07320C_A | -2.15544 | 0.005246 | 3646057  |
| C5_01050C_A | -2.15598 | 0.019428 | 3642648  |
| MRPL3       | -2.15747 | 0.009292 | 3640722  |
| C4_07130W_A | -2.15996 | 0.001847 | 3642938  |



|             |          |          |          |
|-------------|----------|----------|----------|
| DSE1        | -2.16101 | 0.031188 | 3643899  |
| C2_08240W_A | -2.16394 | 0.000243 | 3642344  |
| TBP1        | -2.16764 | 0.005106 | 3647675  |
| RPO26       | -2.16787 | 0.012345 | 3646351  |
| C6_04290W_A | -2.17145 | 0.003027 | 3646280  |
| MIF2        | -2.17263 | 0.000207 | 3639220  |
| MBP1        | -2.17738 | 0.003005 | 3635281  |
| C4_02880C_A | -2.17761 | 0.021369 | 3637907  |
| CR_06060W_A | -2.18039 | 0.010904 | 6335358  |
| C2_00490W_A | -2.18329 | 0.000417 | 3638870  |
| C1_09440W_A | -2.18709 | 0.022724 | 3634857  |
| MUP1        | -2.18794 | 0.009515 | 3642008  |
| PPT1        | -2.18886 | 0.015818 | 3636602  |
| C3_01770C_A | -2.20205 | 0.009967 | 3636588  |
| FGR27       | -2.20799 | 0.001805 | 3646988  |
| VPS27       | -2.20862 | 0.000432 | 3639326  |
| DCP2        | -2.21122 | 0.00177  | 3642069  |
| CR_07830C_A | -2.21334 | 0.00045  | 3647345  |
| C3_04330C_A | -2.21484 | 0.003741 | 3635272  |
| RTG1        | -2.21592 | 0.006613 | 3634929  |
| C3_01680C_A | -2.21845 | 0.023136 | 3636605  |
| C1_07390W_A | -2.22259 | 0.001052 | 3644466  |
| CR_07200W_A | -2.2248  | 0.020965 | 3646044  |
| MAS2        | -2.22564 | 0.015463 | 3647249  |
| C2_02730W_A | -2.22565 | 0.00302  | 3643035  |
| C6_02650C_A | -2.22683 | 0.008424 | 3639223  |
| C1_01470W_A | -2.23313 | 0.001748 | 3640241  |
| C7_01040C_A | -2.23441 | 0.010268 | 3638018  |
| CR_02910W_A | -2.23771 | 0.004446 | 3642586  |
| C2_00190C_A | -2.2389  | 0.000741 | 3638904  |
| GAP5        | -2.24581 | 0.000265 | 3646954  |
| RIB1        | -2.25165 | 0.005966 | 3642607  |
| C7_01590C_A | -2.26023 | 0.042476 | 3637037  |
| C4_02920W_A | -2.26043 | 0.000766 | 3637878  |
| DOT5        | -2.26048 | 0.000646 | 3640519  |
| CKS1        | -2.26504 | 0.001496 | 3647732  |
| C5_00140C_A | -2.26738 | 0.038809 | 3647873  |
| C3_01090W_A | -2.27529 | 0.01094  | 30515176 |
| TIM17       | -2.27613 | 0.010049 | 3647790  |
| C3_04790W_A | -2.27968 | 0.009572 | 3635215  |
| HCH1        | -2.28158 | 0.028139 | 3641626  |
| HAP43       | -2.28195 | 0.000142 | 3644531  |
| C5_00100C_A | -2.28729 | 0.009155 | 3647883  |
| C4_06420W_A | -2.28852 | 0.001004 | 3642795  |
| VPS13       | -2.28852 | 0.000229 | 3646528  |
| C1_09850C_A | -2.29178 | 0.001809 | 3634849  |
| C4_04510W_A | -2.30344 | 0.001289 | 3641120  |

|             |          |          |         |
|-------------|----------|----------|---------|
| GCN1        | -2.30698 | 0.000351 | 3641256 |
| C3_07940W_A | -2.31034 | 0.000551 | 3647453 |
| C5_00820W_A | -2.31463 | 0.002017 | 3644128 |
| CR_09310W_A | -2.31609 | 0.003553 | 3641923 |
| C3_04920C_A | -2.3171  | 8.75E-05 | 3635268 |
| NBN1        | -2.31858 | 0.000628 | 3637410 |
| C1_03400W_A | -2.31875 | 0.00019  | 3636904 |
| SOD6        | -2.32047 | 0.012553 | 3638899 |
| FET3        | -2.3205  | 0.014358 | 3647153 |
| C7_04150W_A | -2.32126 | 0.014204 | 3643128 |
| C2_06090W_A | -2.3227  | 0.001366 | 3644097 |
| SPL1        | -2.32553 | 0.000766 | 3638035 |
| CDC37       | -2.3311  | 0.000981 | 3639210 |
| C5_00030W_A | -2.33475 | 0.001495 | 3647879 |
| CAP1        | -2.33519 | 4.51E-05 | 3636640 |
| TRM12       | -2.33686 | 0.014122 | 3641738 |
| C2_02520W_A | -2.33752 | 0.002211 | 3635818 |
| PHO86       | -2.34288 | 0.005015 | 3642323 |
| C6_04400W_A | -2.34639 | 0.036607 | 3645949 |
| SSU72       | -2.3476  | 0.004143 | 3645129 |
| CSC25       | -2.35155 | 0.000295 | 3645660 |
| C7_02110W_A | -2.35321 | 5.95E-05 | 3637022 |
| C1_11610C_A | -2.3534  | 0.037387 | 3645345 |
| CR_10420W_A | -2.35362 | 0.000166 | 3638974 |
| C1_00530C_A | -2.35487 | 0.001002 | 3639368 |
| C5_02730C_A | -2.35558 | 0.010861 | 3637738 |
| C1_01850C_A | -2.35623 | 0.00099  | 3645431 |
| CR_10040W_A | -2.35697 | 0.00643  | 3639034 |
| TFB3        | -2.35761 | 0.007053 | 3644115 |
| C2_00940W_A | -2.36001 | 0.000648 | 3638891 |
| C6_00360C_A | -2.36136 | 0.013501 | 3646083 |
| DCK2        | -2.36222 | 0.001297 | 3637384 |
| CR_08200C_A | -2.36408 | 0.000657 | 3642087 |
| C1_11770C_A | -2.36597 | 4.44E-05 | 3645327 |
| CR_02460W_A | -2.36656 | 0.000494 | 3644922 |
| C2_10850C_A | -2.36711 | 0.000848 | 3641232 |
| ATG15       | -2.37058 | 0.000502 | 3641641 |
| C2_04770W_A | -2.37255 | 0.011059 | 3647783 |
| GCA1        | -2.37395 | 0.002168 | 3634903 |
| PUS4        | -2.38002 | 0.001388 | 3642661 |
| CNH1        | -2.38147 | 0.001149 | 3648056 |
| C6_02720C_A | -2.38305 | 8.75E-05 | 3639212 |
| PGA7        | -2.3867  | 0.00028  | 3645006 |
| C4_05740C_A | -2.38795 | 0.000813 | 3641806 |
| C7_00350C_A | -2.39224 | 0.000236 | 3638039 |
| RSN1        | -2.3933  | 8.38E-05 | 3638308 |
| CKA1        | -2.39872 | 0.000103 | 3639018 |

|             |          |          |          |
|-------------|----------|----------|----------|
| C3_03110W_A | -2.39883 | 0.014774 | 3638400  |
| NAB3        | -2.40882 | 0.000537 | 3639209  |
| CR_05440W_A | -2.41179 | 0.000503 | 3648245  |
| C1_10230C_A | -2.4158  | 4.04E-05 | 3634880  |
| MHP1        | -2.41592 | 0.005738 | 3642460  |
| HEM1        | -2.41782 | 0.000146 | 3640149  |
| VPS24       | -2.41799 | 0.000286 | 3638892  |
| PAM16       | -2.41811 | 0.000483 | 3643321  |
| C1_11290W_A | -2.41911 | 0.005422 | 3644553  |
| GRX3        | -2.42013 | 0.000513 | 3637858  |
| C1_10200C_A | -2.42087 | 0.006034 | 3634877  |
| MRPL37      | -2.42255 | 0.030509 | 3644782  |
| C7_03970C_A | -2.42785 | 0.000619 | 3643117  |
| CR_05640C_A | -2.42938 | 0.026355 | 3646690  |
| CEF1        | -2.43063 | 0.000396 | 3634808  |
| LIG1        | -2.43093 | 0.000425 | 3636947  |
| FHL1        | -2.43277 | 0.000702 | 3643493  |
| GAR1        | -2.43408 | 0.000853 | 3645332  |
| C3_03330C_A | -2.43681 | 0.000563 | 3638364  |
| C1_01530C_A | -2.43742 | 0.000279 | 3640232  |
| HAP41       | -2.44162 | 0.003058 | 3647405  |
| C1_07980C_A | -2.44512 | 0.000772 | 3640696  |
| C7_00630C_A | -2.44804 | 0.024387 | 3638028  |
| C2_07060W_A | -2.45006 | 0.02037  | 3643500  |
| C4_04660C_A | -2.45173 | 0.000334 | 3641150  |
| SHA3        | -2.45521 | 0.002326 | 3644580  |
| ARG81       | -2.45541 | 0.001592 | 3634775  |
| HTS1        | -2.45721 | 4.91E-05 | 3636532  |
| MLS1        | -2.46076 | 0.004912 | 3634875  |
| CCH1        | -2.46386 | 0.000733 | 3640175  |
| C1_14580C_A | -2.46437 | 0.000331 | 3643290  |
| C6_03380W_A | -2.46634 | 0.000795 | 3639231  |
| C3_04260W_A | -2.4669  | 0.00144  | 3635140  |
| TOK1        | -2.46701 | 0.000703 | 3645754  |
| CR_00820C_A | -2.47572 | 0.001963 | 3640413  |
| EAF3        | -2.47754 | 0.007418 | 3648318  |
| C3_07920W_A | -2.47958 | 0.000216 | 30515226 |
| C4_06410W_A | -2.48027 | 0.012718 | 3642796  |
| KRE6        | -2.48093 | 0.000219 | 3641756  |
| SGE1        | -2.48377 | 0.003077 | 3642614  |
| ELC1        | -2.48452 | 0.036765 | 3646151  |
| C6_03290W_A | -2.48645 | 0.000137 | 3639195  |
| SFT1        | -2.48682 | 0.009478 | 30515372 |
| PHHB        | -2.48775 | 0.000172 | 3638871  |
| CR_02800C_A | -2.48895 | 0.000156 | 3642559  |
| PRB1        | -2.48998 | 8.9E-05  | 3643521  |
| PEL1        | -2.49044 | 0.005989 | 3637989  |

|             |          |          |         |
|-------------|----------|----------|---------|
| HMX1        | -2.49112 | 0.000178 | 3639294 |
| SLM2        | -2.49224 | 4.45E-05 | 3647559 |
| C1_12610W_A | -2.49266 | 0.000292 | 3646825 |
| C3_05380W_A | -2.49281 | 0.020284 | 3643679 |
| POP2        | -2.49518 | 0.000305 | 3640301 |
| C2_08950W_A | -2.4956  | 0.000135 | 3645788 |
| FET34       | -2.49604 | 0.003409 | 3647131 |
| GCD6        | -2.49644 | 0.00073  | 3646510 |
| CR_00040C_A | -2.49981 | 0.000214 | 3639675 |
| HGT4        | -2.50122 | 4.9E-05  | 3635269 |
| ARG1        | -2.50303 | 0.0097   | 3639691 |
| C1_03050W_A | -2.50515 | 0.002546 | 3636843 |
| ROD1        | -2.50521 | 0.000346 | 3635763 |
| C6_00980C_A | -2.51033 | 0.000552 | 3644046 |
| LPI9        | -2.51044 | 0.000567 | 3637060 |
| C5_05000C_A | -2.51123 | 0.001453 | 3636539 |
| C1_14190C_A | -2.51737 | 0.000204 | 3643300 |
| C5_00260W_A | -2.52761 | 0.000156 | 3641561 |
| C7_03000C_A | -2.53129 | 0.002518 | 3641383 |
| DAL1        | -2.53344 | 0.021462 | 3640564 |
| SFT2        | -2.53384 | 0.001694 | 3644442 |
| C2_03500W_A | -2.53697 | 4.98E-05 | 3637345 |
| C1_01220C_A | -2.53751 | 0.005623 | 3640210 |
| C1_06660W_A | -2.53782 | 4.4E-05  | 3639542 |
| C7_01370W_A | -2.54058 | 0.027143 | 3645901 |
| PTP2        | -2.54446 | 0.000264 | 3647858 |
| C5_04170W_A | -2.54525 | 1.23E-05 | 3636543 |
| PMC1        | -2.54749 | 0.000386 | 3636627 |
| C1_14480W_A | -2.54753 | 0.004493 | 3643328 |
| C5_00390C_A | -2.54832 | 0.002686 | 3641552 |
| C2_09980W_A | -2.55098 | 0.000303 | 3643965 |
| BLM3        | -2.55234 | 1.04E-05 | 3642310 |
| HGT8        | -2.55295 | 0.004531 | 3638875 |
| ZSF1        | -2.55945 | 0.000305 | 3641257 |
| SPT5        | -2.561   | 0.000211 | 3635847 |
| ANT1        | -2.56357 | 0.034352 | 3639516 |
| YCP4        | -2.56445 | 0.002148 | 3648032 |
| CR_00750C_A | -2.56665 | 0.000322 | 3640438 |
| CR_10060W_A | -2.56665 | 0.00051  | 3639035 |
| C1_00510W_A | -2.56721 | 0.005183 | 3639311 |
| C7_04290W_A | -2.57162 | 0.00754  | 3643172 |
| C2_10050W_A | -2.57252 | 5.2E-06  | 3643949 |
| C7_01280C_A | -2.57451 | 0.003251 | 3645909 |
| C5_01930W_A | -2.57536 | 0.00261  | 3643741 |
| HAL9        | -2.57738 | 0.001104 | 3643757 |
| ZCF35       | -2.57784 | 0.001018 | 3641740 |
| C3_02420C_A | -2.58205 | 0.005497 | 3638342 |

|             |          |          |          |
|-------------|----------|----------|----------|
| LPG20       | -2.58489 | 0.00585  | 3644780  |
| CR_08400C_A | -2.58549 | 0.000925 | 3642115  |
| STI1        | -2.59345 | 3.86E-05 | 3643758  |
| CDR11       | -2.5968  | 0.002445 | 3647389  |
| EFG1        | -2.59995 | 0.00039  | 3644145  |
| C4_06680C_A | -2.60031 | 0.000187 | 3642950  |
| C3_07380W_A | -2.60547 | 0.001524 | 3638473  |
| C5_03150W_A | -2.60578 | 0.001358 | 3637799  |
| PTC5        | -2.61013 | 6.1E-06  | 3642072  |
| C5_00160W_A | -2.61236 | 0.001601 | 3647871  |
| RIM21       | -2.62041 | 0.00149  | 3643739  |
| GPT1        | -2.62161 | 0.031926 | 3647671  |
| PUT1        | -2.62237 | 0.003281 | 3637779  |
| C6_01620W_A | -2.62279 | 0.000559 | 3641647  |
| C1_10620W_A | -2.62288 | 0.000234 | 3647682  |
| CR_04370W_A | -2.62305 | 0.00597  | 3641004  |
| C4_05260W_A | -2.62348 | 0.003066 | 3648282  |
| STF2        | -2.62702 | 0.000918 | 30515083 |
| C7_01150W_A | -2.62769 | 0.007143 | 3645913  |
| SLR1        | -2.63273 | 0.000256 | 3643957  |
| MLP1        | -2.63314 | 0.000246 | 3635688  |
| NAG6        | -2.63367 | 0.000412 | 3645961  |
| NUP49       | -2.63652 | 6.31E-05 | 3636173  |
| PDX3        | -2.63897 | 0.00108  | 3640949  |
| C2_02770W_A | -2.63987 | 6.15E-06 | 3643031  |
| C3_06830C_A | -2.64175 | 0.000771 | 3638543  |
| C2_10600W_A | -2.64328 | 0.001645 | 3641245  |
| CR_07250C_A | -2.64537 | 0.003605 | 3646028  |
| DAO2        | -2.65003 | 0.00259  | 3646797  |
| IFR1        | -2.65038 | 0.023938 | 3643930  |
| CR_08040W_A | -2.65203 | 0.000607 | 3644135  |
| CR_03230W_A | -2.65403 | 0.004023 | 3645127  |
| C7_01490W_A | -2.65719 | 0.005179 | 3637051  |
| C1_10080W_A | -2.66022 | 0.008374 | 3634814  |
| CR_07160C_A | -2.6615  | 0.005    | 3648347  |
| C4_02110W_A | -2.67399 | 0.001134 | 3635673  |
| C5_00780C_A | -2.67527 | 0.000622 | 3644124  |
| CR_00980C_A | -2.67898 | 5.67E-06 | 3640426  |
| C5_00800C_A | -2.68439 | 0.000455 | 3644126  |
| C3_06600C_A | -2.6894  | 0.002447 | 3642280  |
| C3_03070W_A | -2.69874 | 0.003736 | 3638396  |
| CR_10760C_A | -2.69918 | 0.003362 | 3638943  |
| PRP22       | -2.70071 | 0.000173 | 3636404  |
| LYS144      | -2.70402 | 0.000473 | 3640512  |
| HNH1        | -2.70478 | 0.000701 | 3638857  |
| C4_03140C_A | -2.70698 | 0.006142 | 3637843  |
| YAH1        | -2.70963 | 0.00212  | 3638368  |

|             |          |          |          |
|-------------|----------|----------|----------|
| C3_07490W_A | -2.71894 | 4.26E-05 | 3638528  |
| GCN3        | -2.72422 | 0.001021 | 3645905  |
| C2_10140W_A | -2.72453 | 0.020718 | 3643934  |
| STP2        | -2.72474 | 0.001275 | 3636214  |
| PTR3        | -2.72569 | 0.002445 | 3645428  |
| C2_03950W_A | -2.72634 | 0.001981 | 3637420  |
| CR_08420W_A | -2.72714 | 0.000355 | 3642117  |
| CR_10640W_A | -2.73141 | 0.015705 | 3639014  |
| ATX1        | -2.73523 | 0.004834 | 30515426 |
| DUR32       | -2.73554 | 0.005395 | 3636142  |
| C3_00840C_A | -2.73596 | 0.007131 | 3647758  |
| C2_09790W_A | -2.73701 | 0.00199  | 3643804  |
| MNN4-4      | -2.73877 | 0.006316 | 3639250  |
| C2_07800W_A | -2.73896 | 0.025054 | 3642325  |
| C3_06420C_A | -2.74248 | 0.000342 | 3642262  |
| NMA111      | -2.74364 | 3.32E-05 | 3640179  |
| BMT5        | -2.74573 | 3.26E-06 | 3635781  |
| MET16       | -2.75009 | 0.012622 | 3642964  |
| C4_03000C_A | -2.77233 | 4.94E-05 | 3637935  |
| FCY24       | -2.77369 | 0.021022 | 3641902  |
| C1_07560W_A | -2.77784 | 0.000668 | 3646676  |
| C6_01350W_A | -2.78178 | 0.000474 | 3641642  |
| C6_03220W_A | -2.79693 | 0.003645 | 3639179  |
| C2_07580W_A | -2.79748 | 0.004684 | 3645216  |
| C1_04120C_A | -2.79938 | 0.009459 | 3644701  |
| CR_08330W_A | -2.80846 | 0.005324 | 3642080  |
| C1_05540C_A | -2.81667 | 0.002985 | 3642503  |
| RPP1        | -2.81759 | 0.013673 | 3644681  |
| C2_10540W_A | -2.82085 | 0.000127 | 3641200  |
| OYE2        | -2.82098 | 0.000225 | 3641603  |
| PDR6        | -2.82161 | 1.6E-05  | 3638824  |
| HSK3        | -2.82286 | 0.001562 | 3635730  |
| C3_03670W_A | -2.82529 | 9.15E-06 | 3645649  |
| C6_02690C_A | -2.82539 | 5.41E-05 | 3639228  |
| C2_07640W_A | -2.82725 | 6.27E-05 | 3645192  |
| MIT1        | -2.83051 | 2.87E-05 | 3644089  |
| C3_04940W_A | -2.83355 | 5.42E-05 | 3635270  |
| C3_06820C_A | -2.83906 | 1.26E-06 | 3638544  |
| CR_01370C_A | -2.84015 | 6.35E-05 | 3640168  |
| C5_03010W_A | -2.84059 | 0.003724 | 3637819  |
| C1_09840C_A | -2.84687 | 2.52E-06 | 3634848  |
| C3_03310C_A | -2.84925 | 0.009934 | 3638363  |
| CR_04820W_A | -2.85225 | 5.34E-05 | 3647298  |
| SDS24       | -2.8621  | 0.000776 | 3640756  |
| AAF1        | -2.8654  | 7.32E-07 | 3642284  |
| C6_04420W_A | -2.86576 | 1.66E-05 | 3645951  |
| OPT8        | -2.86841 | 0.013982 | 3640266  |

|             |          |          |          |
|-------------|----------|----------|----------|
| C4_04500C_A | -2.87168 | 0.016731 | 3641123  |
| C2_09240C_A | -2.8726  | 0.003796 | 3644064  |
| CR_07510W_A | -2.87486 | 0.013059 | 3647998  |
| C1_08700W_A | -2.87685 | 3.78E-05 | 3634936  |
| MNL1        | -2.87936 | 4.4E-06  | 3646050  |
| C4_02690W_A | -2.8825  | 7.39E-07 | 3637861  |
| CR_09610C_A | -2.88558 | 0.0002   | 3647094  |
| TRY2        | -2.88787 | 0.000422 | 3647670  |
| C2_09360W_A | -2.8882  | 0.002168 | 3644109  |
| HMT1        | -2.8884  | 0.000245 | 3640182  |
| CDR1        | -2.89022 | 0.000249 | 3635237  |
| MOH1        | -2.89095 | 0.000393 | 3646809  |
| C2_06620W_A | -2.89132 | 0.011184 | 3646564  |
| YTH1        | -2.89239 | 1.68E-06 | 3645572  |
| SRR1        | -2.89241 | 0.014524 | 3647589  |
| C4_04550C_A | -2.90115 | 0.000161 | 3641106  |
| C6_00700C_A | -2.90185 | 0.000193 | 3647074  |
| BMT9        | -2.90293 | 6.3E-06  | 3635654  |
| PEX5        | -2.90346 | 4.55E-06 | 3645026  |
| C1_11110C_A | -2.90381 | 0.017472 | 3644413  |
| TBF1        | -2.91108 | 4.38E-05 | 3637327  |
| CR_03260W_A | -2.91272 | 4.05E-06 | 30515389 |
| C3_02030W_A | -2.91783 | 0.001166 | 3636580  |
| ZCF21       | -2.91881 | 1.32E-05 | 3645762  |
| CR_01570W_A | -2.91992 | 0.049404 | 3640077  |
| CHA1        | -2.92025 | 0.037262 | 3638791  |
| C2_04850C_A | -2.92064 | 9.91E-05 | 3648114  |
| BUB3        | -2.9214  | 7.75E-07 | 3646362  |
| C4_03930C_A | -2.92144 | 0.009355 | 30515262 |
| C2_07680W_A | -2.92332 | 0.00021  | 3642339  |
| C1_11580W_A | -2.92401 | 1.07E-05 | 3645330  |
| SSY5        | -2.92716 | 4.06E-07 | 3642140  |
| CKA2        | -2.92932 | 9.28E-05 | 3643444  |
| RCA1        | -2.9334  | 8.75E-05 | 3639303  |
| C3_07700W_A | -2.93357 | 0.000522 | 3638457  |
| OFD1        | -2.93458 | 0.000286 | 3646962  |
| C2_07040W_A | -2.93633 | 0.000197 | 3643499  |
| C3_00950C_A | -2.93736 | 0.004791 | 3639852  |
| YCF1        | -2.93812 | 1.91E-05 | 3636934  |
| CDC34       | -2.93904 | 3.01E-05 | 3637028  |
| LIG4        | -2.94896 | 0.000137 | 3642986  |
| EST1        | -2.95081 | 1.87E-05 | 3636526  |
| PGA41       | -2.95308 | 0.027761 | 3642800  |
| C1_04820C_A | -2.96152 | 0.004284 | 3644787  |
| C3_04380C_A | -2.96703 | 0.000187 | 3635173  |
| PNC1        | -2.97095 | 0.000302 | 3646232  |
| C2_06650C_A | -2.97199 | 0.015096 | 3648419  |

|             |          |          |         |
|-------------|----------|----------|---------|
| CYM1        | -2.97658 | 0.000282 | 3642244 |
| C3_02750W_A | -2.97711 | 0.012543 | 3638411 |
| UGA1        | -2.98112 | 0.000824 | 3637329 |
| C3_07600W_A | -2.98393 | 0.004833 | 3638495 |
| C3_02980C_A | -2.98616 | 0.002533 | 3638386 |
| C3_01850W_A | -2.99076 | 0.000735 | 3636565 |
| GNP3        | -2.99303 | 0.001093 | 3639027 |
| CR_03870W_A | -2.99366 | 0.005946 | 3643187 |
| C3_00300W_A | -2.99384 | 0.000111 | 3640524 |
| MEF2        | -2.99404 | 0.000375 | 3639564 |
| C2_05670C_A | -2.99466 | 0.0048   | 3645570 |
| CR_10810C_A | -2.99533 | 0.000125 | 3638949 |
| MNN14       | -3.00023 | 1.66E-05 | 3643651 |
| CR_09920W_A | -3.01287 | 0.001399 | 3639028 |
| FZO1        | -3.01537 | 4.93E-05 | 3646848 |
| C7_02550C_A | -3.01865 | 0.000148 | 3637018 |
| C2_01820C_A | -3.02189 | 0.000931 | 3635831 |
| MRPL40      | -3.02199 | 2.94E-05 | 3640968 |
| C2_06200C_A | -3.02561 | 0.00114  | 3646908 |
| C5_04050W_A | -3.02567 | 1.67E-07 | 3647735 |
| C1_05210C_A | -3.02593 | 0.000369 | 3642465 |
| MAS1        | -3.02705 | 9.72E-06 | 3636855 |
| CPP1        | -3.03313 | 0.000119 | 3634865 |
| C1_00540C_A | -3.03398 | 0.000128 | 3639367 |
| GIR2        | -3.03515 | 0.000115 | 3636962 |
| C7_03880C_A | -3.03866 | 0.024219 | 3643142 |
| C4_02330C_A | -3.04236 | 0.011394 | 3637884 |
| DUR4        | -3.04723 | 0.007007 | 3645012 |
| C4_03750C_A | -3.04926 | 0.010428 | 3645356 |
| C1_03040W_A | -3.05027 | 0.003357 | 3636842 |
| DAL5        | -3.05167 | 0.001654 | 3638401 |
| RPL7        | -3.06837 | 0.000703 | 6335362 |
| C3_05850W_A | -3.07796 | 8.85E-05 | 3641758 |
| C5_00130C_A | -3.08309 | 1.1E-05  | 3647881 |
| IML1        | -3.09068 | 4.02E-06 | 3636813 |
| C1_02090C_A | -3.09796 | 0.002234 | 3644577 |
| RPC53       | -3.10171 | 0.001554 | 3637898 |
| C2_07000W_A | -3.10984 | 0.000377 | 3643534 |
| C2_03830W_A | -3.11521 | 0.001834 | 3637399 |
| UGA6        | -3.11878 | 0.005162 | 3642975 |
| TIF3        | -3.12157 | 8.11E-06 | 3641646 |
| C6_00640C_A | -3.12159 | 0.000617 | 3647134 |
| HRR25       | -3.12484 | 1.01E-05 | 3645878 |
| DFG16       | -3.13562 | 1.4E-05  | 3637413 |
| C1_06910C_A | -3.14023 | 6.61E-05 | 3639526 |
| C1_05160C_A | -3.15345 | 0.000518 | 3642468 |
| ISU1        | -3.15652 | 3.29E-06 | 3637007 |



|             |          |          |          |
|-------------|----------|----------|----------|
| C1_02960C_A | -3.15843 | 2.51E-06 | 3636834  |
| TRM1        | -3.15852 | 0.002036 | 3640396  |
| ATO10       | -3.16076 | 0.024811 | 3640394  |
| C6_03000C_A | -3.16094 | 0.033035 | 3639194  |
| NMD5        | -3.16806 | 5.98E-05 | 3645745  |
| C2_07920W_A | -3.17078 | 0.002805 | 3642294  |
| TRY3        | -3.17872 | 1.69E-05 | 3642652  |
| MSU1        | -3.1817  | 0.009272 | 3643919  |
| LEU3        | -3.18304 | 1.05E-05 | 3637757  |
| SFL1        | -3.18333 | 6.9E-06  | 3642498  |
| C2_01540W_A | -3.18548 | 0.000373 | 3635804  |
| C2_02280W_A | -3.18824 | 3.03E-06 | 3635806  |
| C5_04350C_A | -3.18994 | 0.000282 | 3636482  |
| ITR1        | -3.19034 | 1.76E-07 | 3643440  |
| C2_01370C_A | -3.19347 | 7.26E-06 | 3635723  |
| C1_01890C_A | -3.20839 | 2.02E-07 | 3645427  |
| GCD7        | -3.21855 | 3.58E-06 | 3637367  |
| C4_04460C_A | -3.22241 | 3.92E-08 | 3641127  |
| C7_01660C_A | -3.22968 | 7.66E-06 | 3636983  |
| ROT1        | -3.23694 | 0.001759 | 3639350  |
| CR_07680C_A | -3.23718 | 0.01217  | 3648193  |
| C6_02420W_A | -3.23832 | 0.000239 | 3645885  |
| DOT6        | -3.23928 | 5.68E-06 | 3640078  |
| NHP2        | -3.2393  | 5.86E-05 | 3641003  |
| CR_01440C_A | -3.24507 | 2.3E-06  | 30515374 |
| CR_08410W_A | -3.2493  | 6.31E-05 | 3642116  |
| C6_01980C_A | -3.25045 | 6.31E-05 | 3644560  |
| RAT1        | -3.25097 | 1.01E-06 | 3635686  |
| CPA2        | -3.25207 | 4.71E-05 | 3640385  |
| PDR16       | -3.25555 | 0.004117 | 3644679  |
| CR_07670W_A | -3.26751 | 2.02E-05 | 3647255  |
| HOS3        | -3.281   | 6.71E-07 | 3637886  |
| DRE2        | -3.28172 | 2.54E-06 | 3642571  |
| OLE2        | -3.28568 | 1.01E-06 | 3643503  |
| CNT         | -3.28831 | 1.11E-05 | 3644071  |
| CR_07940W_A | -3.28835 | 0.001903 | 3644139  |
| C3_07580W_A | -3.29919 | 0.000124 | 30515225 |
| CRP1        | -3.29992 | 0.000311 | 3634826  |
| CWC22       | -3.29993 | 0.004438 | 3643938  |
| C1_06840C_A | -3.31082 | 2.4E-05  | 30515012 |
| C3_07280C_A | -3.31185 | 1.81E-05 | 3638431  |
| HIP1        | -3.31533 | 3.3E-06  | 3643761  |
| MRPL36      | -3.31906 | 3.11E-06 | 3643733  |
| C4_00100C_A | -3.32618 | 1.05E-08 | 3645004  |
| BGL22       | -3.32756 | 0.000368 | 3641935  |
| C1_06470W_A | -3.33027 | 9.55E-09 | 30515007 |
| C5_01310W_A | -3.33079 | 0.036167 | 3642645  |

|             |          |          |         |
|-------------|----------|----------|---------|
| PRS1        | -3.33354 | 6.88E-06 | 3635817 |
| C1_05650W_A | -3.33734 | 0.001174 | 3639838 |
| C6_03780C_A | -3.34161 | 8.13E-06 | 3640308 |
| C3_07100C_A | -3.34886 | 1.02E-06 | 3638443 |
| C3_00940W_A | -3.35051 | 1.12E-08 | 3639851 |
| SET2        | -3.35211 | 2.12E-06 | 3643923 |
| CR_03910C_A | -3.35966 | 8.72E-07 | 3640954 |
| CR_05910W_A | -3.36001 | 0.000395 | 3646680 |
| MRPL27      | -3.36014 | 0.000117 | 3636884 |
| CR_08190W_A | -3.3635  | 0.013493 | 3642084 |
| RPC40       | -3.36789 | 5.74E-05 | 3643427 |
| C1_06800W_A | -3.37515 | 0.000427 | 3639496 |
| NOT5        | -3.38248 | 2.45E-06 | 3640763 |
| C3_05250C_A | -3.38738 | 3.42E-06 | 3635199 |
| CR_03660C_A | -3.38959 | 1.52E-05 | 3643219 |
| C2_00200W_A | -3.39962 | 5.48E-05 | 3638903 |
| CEM1        | -3.40094 | 0.005616 | 3635242 |
| C1_08240C_A | -3.40105 | 0.001649 | 3640759 |
| C1_10120C_A | -3.40423 | 1.14E-06 | 3634779 |
| C1_05200C_A | -3.40696 | 4.49E-06 | 3642466 |
| C2_05980C_A | -3.40735 | 0.000616 | 3644075 |
| C6_04180W_A | -3.41082 | 4.15E-07 | 3648176 |
| C4_03020W_A | -3.41315 | 2.13E-06 | 3637934 |
| C4_00460C_A | -3.41808 | 3.95E-08 | 3645010 |
| C5_03700C_A | -3.42176 | 0.001598 | 3646990 |
| C3_00500C_A | -3.4219  | 0.000112 | 3640515 |
| C6_01550C_A | -3.42425 | 0.00011  | 3641653 |
| C2_00540W_A | -3.4343  | 2.57E-07 | 3638865 |
| CUP2        | -3.43738 | 4.07E-07 | 3636189 |
| C4_07100C_A | -3.43936 | 8.15E-07 | 3642903 |
| SAP9        | -3.44196 | 9.03E-05 | 3645625 |
| MRV4        | -3.44444 | 0.006046 | 3636547 |
| GAP4        | -3.44534 | 0.000183 | 3644463 |
| MSS51       | -3.45399 | 2.63E-07 | 3639031 |
| C1_01140C_A | -3.45738 | 1.05E-06 | 3640202 |
| ISW2        | -3.4664  | 1.81E-05 | 3642235 |
| CR_07910C_A | -3.4679  | 2.58E-07 | 3644142 |
| C1_07640C_A | -3.47208 | 0.000605 | 3646659 |
| C1_10140C_A | -3.48105 | 0.000393 | 3634780 |
| SUI3        | -3.48361 | 3.29E-07 | 3643130 |
| C6_02980C_A | -3.48399 | 1.63E-06 | 3639192 |
| C3_00160C_A | -3.4852  | 1.62E-05 | 3640591 |
| TPT1        | -3.48764 | 4.42E-05 | 3640543 |
| OPY2        | -3.48773 | 2.32E-06 | 3640765 |
| TIM23       | -3.4955  | 6.54E-05 | 3643777 |
| C3_07900C_A | -3.50073 | 8.66E-05 | 3647450 |
| CR_01780W_A | -3.50173 | 0.001923 | 3640157 |

|             |          |          |          |
|-------------|----------|----------|----------|
| MUC1        | -3.50738 | 6.57E-09 | 3645771  |
| HAP2        | -3.51174 | 8.21E-07 | 3641800  |
| RPC19       | -3.51764 | 0.027518 | 3647693  |
| C2_00220C_A | -3.52134 | 8.56E-06 | 3638902  |
| C2_08850C_A | -3.52145 | 1.45E-07 | 3643890  |
| RTG3        | -3.5247  | 2.3E-07  | 3644423  |
| C4_07170C_A | -3.53499 | 0.001061 | 30515289 |
| C2_08920W_A | -3.53992 | 5.81E-07 | 3645797  |
| ABC1        | -3.55363 | 7.53E-05 | 3640239  |
| C2_10170C_A | -3.55552 | 7.81E-07 | 3643931  |
| PRP39       | -3.55986 | 0.004176 | 3635832  |
| FRP1        | -3.56298 | 7.02E-10 | 3645005  |
| C4_07010C_A | -3.57861 | 0.002668 | 3642966  |
| CFL1        | -3.5789  | 0.002482 | 3641810  |
| C1_09540W_A | -3.58036 | 5.67E-05 | 3634885  |
| C5_04120C_A | -3.58359 | 1.43E-05 | 3636522  |
| IMH3        | -3.5862  | 2.08E-06 | 3646556  |
| RNR22       | -3.58645 | 1.86E-07 | 3645217  |
| YME1        | -3.59605 | 4.77E-05 | 3641816  |
| PGA55       | -3.60323 | 1.31E-06 | 3645784  |
| KRE30       | -3.60328 | 1.74E-06 | 3642311  |
| SEF1        | -3.61071 | 6.16E-09 | 3644945  |
| C7_02120C_A | -3.62326 | 0.0003   | 3637019  |
| CCS1        | -3.62945 | 5.01E-07 | 3644476  |
| CR_09140C_A | -3.63197 | 5.75E-05 | 3641879  |
| C3_00620C_A | -3.641   | 4.65E-06 | 30515171 |
| TPK1        | -3.64112 | 2.98E-07 | 3634879  |
| SAM35       | -3.64331 | 1.62E-05 | 3643329  |
| C1_09390W_A | -3.65192 | 0.000283 | 3634851  |
| C3_07430W_A | -3.66136 | 2.03E-07 | 3638484  |
| C4_04010W_A | -3.66584 | 0.000282 | 3641218  |
| CR_02970C_A | -3.66887 | 2.84E-07 | 3642603  |
| C1_05250W_A | -3.67777 | 0.001305 | 3642462  |
| CR_02700W_A | -3.69512 | 0.022669 | 3642575  |
| SIK1        | -3.69514 | 2.09E-07 | 3638925  |
| CSP1        | -3.69584 | 0.024946 | 3648242  |
| C3_07290W_A | -3.6967  | 2.58E-07 | 3638430  |
| CR_06970C_A | -3.70464 | 6.38E-06 | 3645736  |
| TOR1        | -3.70648 | 1.55E-07 | 3643480  |
| URA7        | -3.71008 | 8.02E-09 | 3636510  |
| C5_03470C_A | -3.71287 | 0.000499 | 3646963  |
| C2_03550C_A | -3.725   | 4.17E-07 | 3637338  |
| TRK1        | -3.7288  | 3.68E-10 | 3644153  |
| PSO2        | -3.72966 | 0.000866 | 3641241  |
| C1_01580W_A | -3.73058 | 1.51E-05 | 3640222  |
| C5_00570W_A | -3.73378 | 8.71E-07 | 3641589  |
| C7_03380W_A | -3.74366 | 3.24E-05 | 30515359 |

|             |          |          |          |
|-------------|----------|----------|----------|
| C3_01520C_A | -3.74543 | 9.99E-07 | 3636570  |
| CR_08680C_A | -3.75501 | 1.7E-09  | 3642127  |
| C1_11900C_A | -3.75511 | 0.000103 | 3642005  |
| SPO72       | -3.77011 | 7.03E-10 | 3644072  |
| C6_02900C_A | -3.77064 | 0.000817 | 3639240  |
| COX19       | -3.77782 | 7.93E-06 | 3636220  |
| CR_03840C_A | -3.7835  | 0.029449 | 3643184  |
| C1_00520W_A | -3.7903  | 1.17E-05 | 3639310  |
| ARG8        | -3.80444 | 3.18E-07 | 3641131  |
| AUT7        | -3.8101  | 2.51E-07 | 30514999 |
| SNT1        | -3.8407  | 6.66E-11 | 3642033  |
| CR_03110W_A | -3.84157 | 0.000876 | 3645124  |
| C3_02920W_A | -3.85093 | 1.25E-10 | 3638379  |
| C7_02660C_A | -3.85623 | 0.010271 | 3647652  |
| PRS5        | -3.85968 | 2.3E-09  | 3642296  |
| NBP2        | -3.86267 | 6.92E-07 | 3636963  |
| HST2        | -3.86384 | 0.000221 | 3640162  |
| TCO89       | -3.87277 | 3.83E-08 | 3644788  |
| CR_03250C_A | -3.87713 | 9.34E-08 | 3645102  |
| MSN4        | -3.89281 | 6.39E-07 | 3634911  |
| VPS21       | -3.89616 | 2.61E-11 | 3642092  |
| C2_07410W_A | -3.89667 | 2.05E-05 | 3645203  |
| TRY4        | -3.8993  | 1.54E-05 | 3635240  |
| DOT4        | -3.90149 | 3.32E-07 | 3646810  |
| C5_03640W_A | -3.90765 | 1.51E-05 | 3646984  |
| RPD3        | -3.9088  | 2.97E-08 | 3642580  |
| BAS1        | -3.91153 | 1.31E-08 | 3641136  |
| C2_05400W_A | -3.91696 | 0.00667  | 3643435  |
| C1_05230W_A | -3.91696 | 0.006758 | 3642463  |
| C3_01130C_A | -3.92303 | 1.76E-08 | 3639901  |
| C1_13880C_A | -3.92448 | 5.71E-07 | 3636133  |
| C1_08710W_A | -3.94841 | 6.58E-05 | 3634937  |
| PCL5        | -3.951   | 7.75E-08 | 3636466  |
| C1_14350W_A | -3.95302 | 3.54E-08 | 3643281  |
| NAR1        | -3.9628  | 1.24E-07 | 3634916  |
| IFM1        | -3.96872 | 1.05E-07 | 3641389  |
| C3_05750C_A | -3.96904 | 0.004803 | 3641719  |
| CR_02930W_A | -3.9759  | 2.46E-11 | 3642588  |
| C3_03300C_A | -3.98178 | 4.17E-09 | 3638361  |
| C2_02110C_A | -3.98768 | 0.000889 | 3635745  |
| ICL1        | -3.99447 | 0.004022 | 3646146  |
| REG1        | -3.99561 | 8.72E-06 | 3638858  |
| C6_00170C_A | -3.99784 | 1.32E-11 | 3647903  |
| C1_09650W_A | -4.007   | 1.56E-06 | 3634870  |
| C4_01280C_A | -4.01732 | 1.05E-05 | 3635700  |
| C2_00170C_A | -4.02133 | 4.19E-07 | 3638906  |
| NPR2        | -4.02898 | 1.08E-05 | 3638360  |

|             |          |          |          |
|-------------|----------|----------|----------|
| CR_06290C_A | -4.03169 | 1.15E-08 | 3644856  |
| C3_07370W_A | -4.03553 | 8.37E-07 | 3638474  |
| C1_10580C_A | -4.05392 | 0.006082 | 3647679  |
| C5_03030W_A | -4.05946 | 0.000265 | 3637822  |
| C2_06800C_A | -4.06198 | 1.9E-05  | 3643518  |
| C3_05440C_A | -4.06718 | 0.000466 | 3643668  |
| RFG1        | -4.06892 | 2.29E-11 | 3642570  |
| C2_02120W_A | -4.08166 | 2.28E-05 | 3635746  |
| BUD23       | -4.08413 | 0.00128  | 3642629  |
| C5_01470C_A | -4.08532 | 0.001278 | 3647050  |
| PGA13       | -4.08739 | 0.032004 | 3642138  |
| DUS4        | -4.09689 | 3.93E-07 | 3641580  |
| C6_03460W_A | -4.10028 | 6.84E-12 | 3640252  |
| C1_05370C_A | -4.10637 | 6.2E-07  | 3642481  |
| C6_04510C_A | -4.10723 | 1.73E-06 | 3645955  |
| UGT51C1     | -4.11477 | 2.38E-09 | 3640147  |
| C2_00840W_A | -4.12193 | 6.4E-05  | 3638807  |
| C2_08030W_A | -4.13144 | 2.01E-05 | 3642309  |
| AGP3        | -4.13147 | 0.001281 | 3641163  |
| CR_04160C_A | -4.13631 | 3.27E-08 | 3640976  |
| DAL8        | -4.13906 | 4.89E-05 | 3635181  |
| C1_05790W_A | -4.13931 | 8.27E-05 | 30515002 |
| C5_04980W_A | -4.13984 | 2.68E-11 | 3636536  |
| C4_03580W_A | -4.14468 | 0.001525 | 3645369  |
| C1_08890C_A | -4.14914 | 0.013932 | 3634924  |
| MTR2        | -4.1502  | 1.59E-08 | 30515167 |
| C1_05360C_A | -4.15552 | 9.83E-07 | 3642482  |
| NDT80       | -4.16856 | 3.4E-08  | 3638840  |
| C5_02680W_A | -4.17024 | 2.6E-09  | 3637774  |
| RIT1        | -4.17354 | 0.000221 | 3638492  |
| C3_03370C_A | -4.18369 | 2.19E-06 | 3638366  |
| SET6        | -4.18542 | 0.000338 | 3644590  |
| C2_00810C_A | -4.22204 | 0.000242 | 3638810  |
| C2_08860W_A | -4.22476 | 2.06E-10 | 3645776  |
| C4_04560C_A | -4.23201 | 1.67E-08 | 3641105  |
| C1_03140W_A | -4.23451 | 1.09E-06 | 3636929  |
| RPF1        | -4.24543 | 6.99E-07 | 3637890  |
| C3_02630C_A | -4.24573 | 1.11E-06 | 3638328  |
| C6_02660C_A | -4.24797 | 0.000452 | 3639224  |
| C1_11200W_A | -4.24896 | 5.09E-05 | 3644396  |
| C2_00090W_A | -4.25326 | 3.73E-05 | 3647910  |
| LIP4        | -4.26016 | 1.47E-06 | 3645987  |
| C2_06570C_A | -4.27938 | 1.43E-09 | 3646561  |
| CR_07480W_A | -4.27939 | 2.28E-07 | 3646047  |
| C1_06770W_A | -4.29354 | 9.39E-09 | 3639504  |
| C2_09000C_A | -4.29482 | 0.005197 | 3645782  |
| C4_01090C_A | -4.29594 | 0.003777 | 3635685  |

|             |          |          |         |
|-------------|----------|----------|---------|
| HSX11       | -4.31758 | 0.001684 | 3635660 |
| ADE8        | -4.32019 | 1.6E-06  | 3642999 |
| C7_03590C_A | -4.32359 | 1.17E-05 | 3646239 |
| C2_02270C_A | -4.3386  | 2.24E-06 | 3635805 |
| DEF1        | -4.34301 | 1.91E-06 | 3639023 |
| C7_04160W_A | -4.3534  | 1.53E-05 | 3643127 |
| RHD1        | -4.35511 | 0.001015 | 3647531 |
| EHT1        | -4.36429 | 1.55E-07 | 3636894 |
| C2_02300W_A | -4.36645 | 7.5E-06  | 3635808 |
| CR_02510W_A | -4.38048 | 1.12E-12 | 3647694 |
| C1_07130C_A | -4.41262 | 1.57E-08 | 3644462 |
| PUF3        | -4.4131  | 4.46E-08 | 3646950 |
| SDH4        | -4.42113 | 0.000313 | 3636497 |
| CR_03760W_A | -4.43035 | 0.000183 | 3643178 |
| C6_02380W_A | -4.44135 | 2.05E-12 | 3645883 |
| C2_02820C_A | -4.444   | 7.69E-07 | 3643027 |
| SBA1        | -4.44477 | 5.07E-09 | 3640305 |
| C1_13330C_A | -4.45536 | 8.88E-09 | 3636150 |
| C4_05970W_A | -4.45728 | 2.78E-10 | 3646514 |
| CTR2        | -4.45804 | 2.32E-09 | 3648427 |
| C7_00340C_A | -4.47901 | 1.41E-12 | 3638040 |
| TCC1        | -4.48275 | 9.17E-12 | 3638524 |
| C7_03400C_A | -4.48732 | 2.05E-10 | 3646717 |
| C7_02460C_A | -4.50047 | 1.77E-10 | 3636946 |
| C5_04080C_A | -4.52145 | 3.75E-08 | 3647731 |
| C5_04290C_A | -4.52578 | 1.14E-07 | 3636455 |
| C4_01960C_A | -4.52708 | 2.24E-10 | 3635664 |
| C3_05450C_A | -4.53678 | 4.25E-10 | 3643669 |
| ZCF29       | -4.56571 | 1.66E-09 | 3641370 |
| BUD5        | -4.57391 | 1.03E-07 | 3647315 |
| C2_09570C_A | -4.59744 | 0.000642 | 3643811 |
| C5_02010C_A | -4.60603 | 2.37E-10 | 3643772 |
| ALR1        | -4.61106 | 4.3E-09  | 3636616 |
| C6_02970C_A | -4.61295 | 5.26E-07 | 3639190 |
| C3_04620C_A | -4.61401 | 0.000111 | 3635155 |
| C5_03410C_A | -4.62102 | 1.6E-06  | 3646347 |
| C6_03390W_A | -4.62141 | 5.5E-06  | 3639232 |
| ATG1        | -4.62266 | 2.79E-08 | 3641175 |
| ATG9        | -4.62335 | 1.43E-07 | 3635239 |
| C2_07280W_A | -4.62551 | 0.00617  | 3643475 |
| ISA2        | -4.64231 | 1.31E-09 | 3638513 |
| URK1        | -4.64293 | 1.76E-08 | 3635186 |
| C1_01630W_A | -4.64651 | 1.45E-10 | 3640194 |
| CR_00670C_A | -4.64977 | 9.15E-05 | 3639655 |
| C5_04990W_A | -4.66295 | 0.000497 | 3636538 |
| C6_02020C_A | -4.67266 | 3.6E-10  | 3647563 |
| EPL1        | -4.67279 | 1.73E-13 | 3639732 |

|             |          |          |         |
|-------------|----------|----------|---------|
| C2_07250C_A | -4.67307 | 0.00198  | 3643487 |
| C4_07060W_A | -4.6767  | 7.73E-11 | 3642908 |
| PFK26       | -4.68109 | 9.62E-12 | 3634912 |
| C2_05080C_A | -4.68904 | 0.004006 | 3643453 |
| PRA1        | -4.68967 | 0.003081 | 3642969 |
| YOR1        | -4.69005 | 1.94E-09 | 3643964 |
| C7_03270W_A | -4.69189 | 9.21E-09 | 3641365 |
| C1_06090C_A | -4.6924  | 4.8E-09  | 3639822 |
| IFF6        | -4.70151 | 1.01E-07 | 3644087 |
| C4_02520C_A | -4.70338 | 2E-09    | 3637863 |
| C1_08840W_A | -4.71688 | 0.007301 | 3634919 |
| STE11       | -4.71883 | 7.02E-13 | 3637369 |
| C4_03230C_A | -4.73062 | 0.012645 | 3637836 |
| CR_01950W_A | -4.73901 | 3.97E-07 | 3640107 |
| C2_01070W_A | -4.75112 | 3.65E-07 | 3638834 |
| SIP5        | -4.75135 | 1.21E-08 | 3639865 |
| C1_11880W_A | -4.76027 | 2.62E-06 | 3642007 |
| TPO4        | -4.76973 | 2.15E-08 | 3640956 |
| HBR1        | -4.77558 | 1.22E-09 | 3639295 |
| CR_03160W_A | -4.77673 | 8.87E-06 | 3645117 |
| MET2        | -4.78065 | 6.64E-08 | 3640070 |
| C7_03230C_A | -4.78392 | 0.033366 | 3641369 |
| CCC2        | -4.8188  | 1.59E-13 | 3637821 |
| CR_07540C_A | -4.82935 | 0.043409 | 3648001 |
| C6_03280W_A | -4.82937 | 0.041643 | 3639185 |
| MDM34       | -4.83306 | 5.33E-09 | 3647517 |
| C4_06850C_A | -4.85115 | 2.32E-09 | 3642912 |
| C4_02090C_A | -4.85586 | 6.72E-10 | 3635642 |
| C3_06700C_A | -4.86346 | 6.6E-12  | 3642247 |
| CR_06450W_A | -4.86944 | 0.000143 | 3645279 |
| NOP1        | -4.87102 | 6.97E-11 | 3642947 |
| C3_07800C_A | -4.87366 | 3.3E-07  | 3647461 |
| C3_04370C_A | -4.87767 | 9.31E-08 | 3635172 |
| SLD1        | -4.89395 | 4.23E-07 | 3638406 |
| C3_00030C_A | -4.89524 | 3.08E-07 | 3640571 |
| CR_06840W_A | -4.90535 | 2.3E-08  | 3647322 |
| YPT53       | -4.92036 | 3.26E-08 | 3642483 |
| RGA2        | -4.92818 | 3.78E-15 | 3635661 |
| CYC3        | -4.95854 | 1.04E-10 | 3642621 |
| GZF3        | -4.98552 | 9.2E-11  | 3642563 |
| C5_02980C_A | -4.99006 | 1.1E-07  | 3637816 |
| LEU42       | -5.0055  | 6.69E-10 | 3643808 |
| C7_01210C_A | -5.03616 | 1.4E-09  | 3645904 |
| FLO8        | -5.04059 | 4.93E-11 | 3646292 |
| CR_08650C_A | -5.06407 | 1.05E-13 | 3642124 |
| FGR23       | -5.07334 | 3.51E-05 | 3636555 |
| C5_02640W_A | -5.07854 | 1.31E-07 | 3637785 |

|             |          |          |          |
|-------------|----------|----------|----------|
| JEN2        | -5.07889 | 0.007398 | 3641214  |
| SSY1        | -5.08057 | 4.92E-12 | 3637382  |
| C1_00860W_A | -5.0815  | 4.86E-06 | 3639358  |
| C2_02960C_A | -5.08737 | 2.59E-07 | 3643011  |
| HSP104      | -5.10592 | 7.06E-07 | 3642097  |
| PAM18       | -5.11181 | 8.32E-08 | 3645747  |
| HGH1        | -5.12811 | 5.61E-08 | 3635647  |
| SHY1        | -5.14018 | 4.24E-12 | 3634824  |
| C5_03740W_A | -5.14708 | 3.36E-08 | 3647237  |
| C6_02150C_A | -5.15378 | 5.38E-05 | 3645888  |
| C2_09820W_A | -5.1727  | 1.67E-08 | 3643801  |
| ZCF30       | -5.18164 | 2.99E-09 | 3642051  |
| C1_13380W_A | -5.18553 | 9.22E-05 | 3636217  |
| PUS7        | -5.1973  | 9.68E-08 | 3643960  |
| C5_01560C_A | -5.20074 | 1.97E-08 | 3647064  |
| SMD2        | -5.20258 | 0.002377 | 30515133 |
| CR_02890C_A | -5.20529 | 2.83E-07 | 3642585  |
| C1_00090W_A | -5.22294 | 4.36E-05 | 3639304  |
| C4_01500W_A | -5.22451 | 1.74E-06 | 3635617  |
| C7_04140C_A | -5.24103 | 1.96E-08 | 3643129  |
| C4_05650W_A | -5.25814 | 2.99E-06 | 3641814  |
| C6_01340C_A | -5.25919 | 3.34E-06 | 30515331 |
| C1_07530W_A | -5.26694 | 0.000897 | 30515025 |
| C7_01020C_A | -5.27163 | 2.3E-07  | 3638020  |
| C3_06560W_A | -5.2717  | 1.5E-14  | 3642276  |
| CR_10430C_A | -5.27646 | 0.004099 | 3638975  |
| C2_01510C_A | -5.27719 | 0.002432 | 3635801  |
| C2_02920W_A | -5.28173 | 3.36E-14 | 3643016  |
| OYE32       | -5.28713 | 3.38E-09 | 3642919  |
| CIRT4B      | -5.3175  | 1.24E-14 | 3642560  |
| VTC4        | -5.32248 | 2.08E-13 | 3646795  |
| DAC1        | -5.32716 | 3.9E-10  | 3645967  |
| C6_02290C_A | -5.33441 | 2.23E-09 | 3645873  |
| C1_06540C_A | -5.34463 | 1.37E-08 | 3639520  |
| C7_02930C_A | -5.36402 | 9.12E-11 | 3641390  |
| C5_04530W_A | -5.37127 | 6.6E-12  | 3636507  |
| C4_06040W_A | -5.38091 | 1.91E-05 | 3646521  |
| PRN1        | -5.39341 | 1.48E-06 | 3639882  |
| CAG1        | -5.40535 | 3.6E-05  | 3636469  |
| C2_05060C_A | -5.40613 | 1.84E-05 | 3643451  |
| BUL4        | -5.4089  | 8.7E-12  | 3642037  |
| C2_05270W_A | -5.43284 | 1.78E-10 | 3643470  |
| NAG1        | -5.43842 | 2.93E-09 | 3645966  |
| UTP20       | -5.44896 | 3.89E-11 | 3647956  |
| NOP5        | -5.46182 | 4.32E-14 | 3646084  |
| MDN1        | -5.46262 | 6.64E-13 | 3635614  |
| PDE2        | -5.46559 | 9.83E-14 | 3636877  |



|             |          |          |          |
|-------------|----------|----------|----------|
| C4_06990W_A | -5.47733 | 2.41E-11 | 3642968  |
| MLH3        | -5.48159 | 1.99E-09 | 3643294  |
| C7_03210W_A | -5.48533 | 1.64E-05 | 3641371  |
| C2_04520C_A | -5.50447 | 0.000613 | 3645447  |
| C7_01360C_A | -5.50949 | 0.013823 | 3645900  |
| IFH1        | -5.50986 | 2.67E-15 | 3637770  |
| C7_02160W_A | -5.51018 | 5.29E-08 | 3636994  |
| PWP1        | -5.51771 | 1.83E-09 | 3635623  |
| C4_05590W_A | -5.53074 | 2.25E-12 | 3641776  |
| C2_02710C_A | -5.54602 | 1.43E-09 | 3643003  |
| CR_10400W_A | -5.5618  | 4.08E-12 | 3638956  |
| C6_00380C_A | -5.57412 | 2.95E-09 | 3646085  |
| C4_06200W_A | -5.59519 | 0.001248 | 30515282 |
| ZCF3        | -5.59545 | 1.69E-11 | 3645335  |
| C1_10250C_A | -5.59559 | 0.000828 | 3634882  |
| C5_03460C_A | -5.60396 | 5.53E-06 | 3646345  |
| BRE1        | -5.61396 | 5.82E-15 | 3641568  |
| C2_04110W_A | -5.62937 | 0.000114 | 3637378  |
| C3_00340W_A | -5.63649 | 2.27E-05 | 3640544  |
| C1_14080W_A | -5.63764 | 1.7E-13  | 3643345  |
| C1_11320C_A | -5.64424 | 3.52E-07 | 30515052 |
| PHR3        | -5.68331 | 2.05E-17 | 3645003  |
| CR_04600W_A | -5.70353 | 7.35E-12 | 3640950  |
| RXT3        | -5.75069 | 1.41E-11 | 3643431  |
| C5_04840C_A | -5.75271 | 9.89E-11 | 3636435  |
| CR_06680C_A | -5.76638 | 7.56E-08 | 3646623  |
| C1_09040C_A | -5.76869 | 2.39E-10 | 3634769  |
| CR_10280W_A | -5.77571 | 4.14E-07 | 3638934  |
| RPA190      | -5.78153 | 1.57E-13 | 3647677  |
| KNS1        | -5.78769 | 6.5E-09  | 3636228  |
| C1_09780C_A | -5.78943 | 3.38E-10 | 3634842  |
| C1_11080W_A | -5.81774 | 1.04E-11 | 3644416  |
| ARO10       | -5.84576 | 9.58E-08 | 3647320  |
| C1_09320C_A | -5.85034 | 1.43E-11 | 3634834  |
| ELP3        | -5.85738 | 1.73E-14 | 3641747  |
| RRP42       | -5.87122 | 6.48E-05 | 3647852  |
| C2_01050W_A | -5.93727 | 0.02549  | 30515086 |
| FGR46       | -5.9377  | 0.018718 | 3638989  |
| CR_02600W_A | -5.9377  | 0.018826 | 3642596  |
| ISY1        | -5.94898 | 2.34E-06 | 3646233  |
| C2_03570C_A | -5.96059 | 1.41E-05 | 3637336  |
| HIT1        | -5.96136 | 1.27E-05 | 3637854  |
| PWP2        | -5.98848 | 2.23E-14 | 3640416  |
| RMT2        | -5.9971  | 2.43E-08 | 3641569  |
| GYP7        | -6.00423 | 2.46E-15 | 3646245  |
| C2_05990C_A | -6.0047  | 0.000726 | 3644074  |
| RIM2        | -6.03518 | 4.45E-07 | 3645448  |

|             |          |          |         |
|-------------|----------|----------|---------|
| C5_02020C_A | -6.03756 | 8.13E-13 | 3643771 |
| TPS2        | -6.04752 | 6.5E-09  | 3636892 |
| CR_05550C_A | -6.05354 | 1.01E-13 | 3647593 |
| WAR1        | -6.05552 | 2.03E-08 | 3644691 |
| STB3        | -6.06455 | 1.9E-15  | 3645781 |
| C1_09520C_A | -6.07041 | 4.73E-17 | 3634766 |
| C3_02670W_A | -6.07555 | 1.54E-05 | 3638405 |
| C1_11160C_A | -6.08382 | 1.41E-06 | 3644399 |
| IMP4        | -6.0877  | 1.15E-12 | 3644138 |
| C1_06510C_A | -6.14296 | 1.35E-09 | 3639549 |
| C2_04820W_A | -6.14923 | 6.61E-08 | 3647776 |
| FUN31       | -6.15188 | 9.77E-13 | 3642249 |
| SUA71       | -6.16349 | 2.41E-13 | 3636879 |
| C5_01730W_A | -6.1741  | 1.09E-05 | 3643730 |
| RAD3        | -6.18343 | 2.9E-17  | 3638014 |
| MDJ1        | -6.18356 | 5.23E-15 | 3646980 |
| MET1        | -6.19167 | 5.98E-07 | 3643014 |
| ERO1        | -6.19486 | 9.29E-09 | 3634810 |
| C1_14380C_A | -6.19672 | 1.1E-08  | 3643285 |
| RIO2        | -6.20419 | 8.11E-13 | 3642066 |
| C1_05270C_A | -6.2196  | 1.5E-09  | 3642476 |
| C2_02630W_A | -6.24371 | 7.21E-06 | 3635839 |
| FGR50       | -6.24768 | 0.005067 | 3644859 |
| WHI3        | -6.27311 | 6.45E-14 | 3636991 |
| C3_01150C_A | -6.27672 | 2.33E-07 | 3648401 |
| C6_01590W_A | -6.28213 | 3.65E-18 | 3641650 |
| NAG3        | -6.2896  | 3.27E-07 | 3645969 |
| C4_00260W_A | -6.29752 | 2.18E-13 | 3645037 |
| RIM101      | -6.32067 | 1.22E-09 | 3643280 |
| C3_05140C_A | -6.32215 | 4.25E-07 | 3635161 |
| C1_13370W_A | -6.32864 | 8.59E-05 | 3636216 |
| C2_09610W_A | -6.33622 | 4.22E-09 | 3643798 |
| C3_05860C_A | -6.36066 | 8.45E-09 | 3641759 |
| C1_13590W_A | -6.36572 | 0.021273 | 3636209 |
| C2_00280C_A | -6.42137 | 6.93E-08 | 3638802 |
| C2_05830C_A | -6.44883 | 3.75E-11 | 3647483 |
| MNN4        | -6.46495 | 4.47E-16 | 3642784 |
| PRP8        | -6.49636 | 1.59E-17 | 3642125 |
| CR_06980W_A | -6.49967 | 0.000256 | 3645735 |
| C1_06750W_A | -6.5009  | 0.000125 | 3639506 |
| C3_00100W_A | -6.54012 | 4.42E-09 | 3640567 |
| C6_04300W_A | -6.56193 | 4.24E-09 | 3646286 |
| C1_12750C_A | -6.56421 | 1.42E-08 | 3646818 |
| C1_06820W_A | -6.57359 | 2.64E-13 | 3639493 |
| ARO80       | -6.62582 | 1.58E-09 | 3636808 |
| DBP2        | -6.63948 | 2.87E-13 | 3647692 |
| C4_05160C_A | -6.64284 | 2.56E-15 | 3647411 |

|             |          |          |          |
|-------------|----------|----------|----------|
| CR_03200C_A | -6.65638 | 1.57E-09 | 3645131  |
| SOK1        | -6.68934 | 7.95E-14 | 3642495  |
| CR_08830W_A | -6.69368 | 6.15E-05 | 30515450 |
| PGA48       | -6.69837 | 7.22E-16 | 3647905  |
| C1_06380C_A | -6.70892 | 0.000159 | 3639559  |
| STP4        | -6.72165 | 6.2E-07  | 3637405  |
| CR_10750C_A | -6.725   | 9.07E-08 | 3638942  |
| C7_00590W_A | -6.73112 | 5.48E-11 | 3637994  |
| C2_03000C_A | -6.73881 | 2.22E-08 | 3643022  |
| RIX7        | -6.77388 | 2.68E-15 | 3637735  |
| ALS6        | -6.78254 | 9.28E-10 | 3642266  |
| COX17       | -6.79264 | 1.26E-06 | 30515088 |
| MTG1        | -6.80343 | 1.29E-07 | 3645139  |
| C3_07550C_A | -6.81359 | 6.27E-13 | 3638525  |
| CR_04220C_A | -6.8394  | 2.63E-08 | 3640943  |
| SAP10       | -6.84143 | 1.84E-09 | 3641126  |
| C1_12570C_A | -6.85962 | 5.08E-10 | 3647604  |
| HAP42       | -6.86409 | 1.51E-14 | 3635729  |
| GCA2        | -6.86975 | 1.24E-14 | 3647194  |
| C1_13390W_A | -6.89328 | 8.44E-07 | 3636218  |
| C4_03740W_A | -6.90647 | 8.91E-11 | 3645357  |
| RAS2        | -6.91535 | 4.45E-15 | 3635211  |
| C2_08700C_A | -6.91684 | 1.62E-16 | 3643887  |
| C6_04240W_A | -6.94318 | 6.09E-06 | 3646276  |
| GCV2        | -6.94972 | 1.1E-11  | 3646505  |
| PAN6        | -6.95534 | 3.23E-12 | 3647684  |
| C2_02420C_A | -6.98212 | 1.32E-10 | 3635756  |
| CPA1        | -6.98637 | 2.22E-10 | 3635715  |
| FAL1        | -6.99442 | 1.25E-10 | 3639839  |
| C3_00410C_A | -7.00176 | 0.001824 | 3640552  |
| CYS3        | -7.0018  | 7.68E-09 | 3642081  |
| C5_01900C_A | -7.04593 | 0.008102 | 30515302 |
| C3_03470W_A | -7.04687 | 0.008778 | 3638306  |
| C5_01020C_A | -7.04694 | 0.008364 | 30515297 |
| C1_00160C_A | -7.05922 | 1.37E-13 | 3639341  |
| C6_03520C_A | -7.07694 | 0.00246  | 3640259  |
| C5_03800W_A | -7.09127 | 1.6E-10  | 3647230  |
| C4_00750C_A | -7.11042 | 4.02E-05 | 3645763  |
| C1_13010W_A | -7.11501 | 3.66E-09 | 3636120  |
| CR_03980W_A | -7.13257 | 4.49E-11 | 3640964  |
| MRP17       | -7.13535 | 1.3E-12  | 3641548  |
| C2_10740C_A | -7.17998 | 2.02E-13 | 3641236  |
| C7_01880C_A | -7.19299 | 0.040184 | 3637031  |
| C3_05840W_A | -7.19303 | 0.033543 | 3641757  |
| C6_01020W_A | -7.19351 | 0.047124 | 3644050  |
| MRF1        | -7.19619 | 4.59E-16 | 3645321  |
| SOF1        | -7.21822 | 5.74E-11 | 3640585  |

|             |          |          |          |
|-------------|----------|----------|----------|
| PES1        | -7.25645 | 3.57E-13 | 3644105  |
| PZF1        | -7.28658 | 7.52E-13 | 3648113  |
| UTP8        | -7.32993 | 8.57E-18 | 3640547  |
| C1_04720W_A | -7.33244 | 1.6E-08  | 30514988 |
| GAC1        | -7.35582 | 1.66E-10 | 3638025  |
| C1_09790C_A | -7.36718 | 6.4E-16  | 3634843  |
| C4_05230C_A | -7.38951 | 4.18E-12 | 3646156  |
| JIP5        | -7.39298 | 3.08E-13 | 3634922  |
| C1_01750W_A | -7.40425 | 0.000598 | 3645413  |
| C2_05640W_A | -7.40724 | 1.09E-16 | 3645566  |
| C1_05930C_A | -7.41092 | 5.85E-14 | 3639862  |
| YTM1        | -7.41385 | 1.53E-10 | 3634765  |
| AOX2        | -7.43158 | 1.68E-06 | 3634945  |
| FCR1        | -7.44273 | 3.63E-15 | 3638542  |
| RPA135      | -7.45699 | 2.37E-15 | 3637996  |
| C3_05900W_A | -7.46144 | 5.64E-14 | 3641739  |
| C1_04510W_A | -7.46324 | 3.45E-07 | 3646147  |
| C2_06850W_A | -7.46348 | 0.002951 | 30515142 |
| C5_02280C_A | -7.47857 | 5.77E-12 | 3637712  |
| C2_02540W_A | -7.48642 | 7.05E-18 | 3635820  |
| OYE23       | -7.50006 | 7.38E-05 | 3641618  |
| MRT4        | -7.51679 | 1.55E-08 | 3639219  |
| CUP9        | -7.52577 | 3.81E-07 | 3636950  |
| KCS1        | -7.5327  | 1.99E-10 | 3648120  |
| C4_07040W_A | -7.53422 | 0.00012  | 3642963  |
| TYE7        | -7.53787 | 3.91E-12 | 3636203  |
| C4_06210C_A | -7.56213 | 1.17E-12 | 3642815  |
| C5_04850W_A | -7.56736 | 5.28E-06 | 3636436  |
| C6_01780C_A | -7.57863 | 4.22E-11 | 3641636  |
| CEK2        | -7.60632 | 1.85E-05 | 3642459  |
| NEP1        | -7.67339 | 2.59E-09 | 3644545  |
| ZCF28       | -7.68476 | 2.56E-08 | 3634776  |
| RPO41       | -7.69348 | 3.67E-14 | 3639378  |
| RCL1        | -7.70752 | 3.02E-11 | 3645199  |
| TRY6        | -7.71299 | 4.91E-05 | 3638499  |
| CR_03940W_A | -7.73899 | 2.58E-09 | 3648378  |
| QDR1        | -7.78526 | 2.65E-07 | 3640941  |
| ZPR1        | -7.80714 | 2.56E-16 | 3640177  |
| SUT1        | -7.81001 | 2.14E-17 | 3637706  |
| C2_07020C_A | -7.81393 | 3.54E-07 | 3643497  |
| RRP6        | -7.81872 | 7.6E-13  | 3647535  |
| MTLA2       | -7.82772 | 0.01338  | 3643766  |
| C1_10440W_A | -7.88437 | 1.61E-12 | 3647180  |
| C1_02850W_A | -7.88979 | 3.74E-17 | 3636862  |
| SUV3        | -7.92113 | 3.33E-09 | 3645451  |
| ATS1        | -8.01264 | 3.37E-10 | 3642079  |
| CR_08940W_A | -8.01441 | 1.01E-10 | 3641914  |

|             |          |          |          |
|-------------|----------|----------|----------|
| MIS12       | -8.04277 | 6.08E-19 | 3639669  |
| ALS5        | -8.07235 | 7.51E-14 | 3640277  |
| CDA2        | -8.07785 | 4.93E-07 | 3639716  |
| RRN11       | -8.10955 | 1.31E-11 | 3645276  |
| MIH1        | -8.12684 | 9.8E-17  | 3648188  |
| C3_00150W_A | -8.12931 | 0.000157 | 3640595  |
| TAZ1        | -8.133   | 6.26E-09 | 3644108  |
| C6_00520W_A | -8.1552  | 0.002933 | 3647147  |
| C1_09210C_A | -8.16473 | 9.18E-24 | 3634897  |
| CR_04750W_A | -8.17874 | 0.004504 | 30515399 |
| CR_09740W_A | -8.18747 | 2.3E-11  | 3639008  |
| C5_03630C_A | -8.21667 | 1.13E-05 | 3646983  |
| C7_01690W_A | -8.22056 | 8.27E-11 | 3636980  |
| RLP24       | -8.22673 | 5.57E-11 | 3645748  |
| WSC1        | -8.23839 | 5.4E-11  | 3635138  |
| ARF1        | -8.24084 | 5.16E-16 | 3642130  |
| C1_11020W_A | -8.24591 | 1.94E-09 | 3644420  |
| HAS1        | -8.34127 | 1.64E-14 | 3636443  |
| CR_07750C_A | -8.358   | 9.94E-13 | 3647350  |
| C6_03800C_A | -8.3858  | 1.39E-19 | 3640310  |
| CR_10410C_A | -8.40114 | 1.81E-14 | 3638957  |
| CR_00810W_A | -8.41612 | 5.27E-06 | 3640415  |
| UTP13       | -8.50437 | 1.5E-17  | 3637718  |
| C2_00760C_A | -8.50923 | 1.56E-17 | 3638910  |
| RPA34       | -8.52131 | 7.03E-13 | 3634883  |
| CR_08470W_A | -8.55183 | 3.16E-16 | 3642134  |
| UTP15       | -8.55705 | 1.54E-12 | 3643906  |
| C3_07650C_A | -8.56075 | 1.75E-07 | 3638488  |
| C1_13250W_A | -8.56189 | 8.58E-24 | 3636143  |
| CR_08720W_A | -8.57626 | 5.84E-09 | 3642122  |
| PRP5        | -8.63387 | 3.56E-19 | 3638447  |
| C5_02070C_A | -8.63723 | 2.76E-15 | 3643746  |
| MTM1        | -8.65853 | 2.89E-13 | 3642487  |
| LIP1        | -8.66242 | 3.61E-05 | 3634888  |
| FET31       | -8.73541 | 1.73E-07 | 3647151  |
| C3_02840W_A | -8.82752 | 8.11E-06 | 3638331  |
| C4_03190W_A | -8.83178 | 9.79E-12 | 3637838  |
| C7_02610C_A | -8.88027 | 1.02E-12 | 3648285  |
| C3_02180C_A | -8.89001 | 7.54E-12 | 3636643  |
| CR_06330C_A | -8.93946 | 2.06E-09 | 3644846  |
| ALS9        | -8.97223 | 1.53E-16 | 3640281  |
| CR_04170W_A | -8.98282 | 1.24E-19 | 3640977  |
| PNG2        | -9.05476 | 3.51E-22 | 3645568  |
| C5_03530C_A | -9.06464 | 0.030282 | 3646971  |
| C7_01940C_A | -9.06917 | 5.15E-26 | 3636971  |
| C4_03830W_A | -9.07357 | 1.67E-10 | 3647851  |
| CR_03710C_A | -9.1044  | 5.46E-16 | 3643224  |

|             |          |          |         |
|-------------|----------|----------|---------|
| SFP1        | -9.10888 | 4.97E-15 | 3635225 |
| ARX1        | -9.12362 | 1.87E-13 | 3636811 |
| C3_03250W_A | -9.15772 | 1.65E-22 | 3638318 |
| C4_04300C_A | -9.18869 | 1.66E-09 | 3646843 |
| RPF2        | -9.19349 | 2.21E-11 | 3643467 |
| C6_01890C_A | -9.30379 | 3.58E-18 | 3641598 |
| AQY1        | -9.31789 | 7.21E-12 | 3642587 |
| C1_06620C_A | -9.33568 | 0.012105 | 3639545 |
| DHH1        | -9.34223 | 1.13E-12 | 3639490 |
| C1_07650W_A | -9.36382 | 2.44E-11 | 3646657 |
| C2_00650W_A | -9.38792 | 7.76E-13 | 3638889 |
| ARR3        | -9.42735 | 4.78E-10 | 3642910 |
| C6_04050W_A | -9.44432 | 2.79E-10 | 3647830 |
| C4_06790W_A | -9.46447 | 1.01E-13 | 3642918 |
| FUS1        | -9.46651 | 0.048855 | 3645342 |
| C4_02190C_A | -9.46651 | 0.048855 | 3635697 |
| C4_02230C_A | -9.46656 | 0.048855 | 3635693 |
| C1_12630C_A | -9.46987 | 8.91E-10 | 3646838 |
| C5_02440C_A | -9.47347 | 7.23E-10 | 3637728 |
| C1_14330W_A | -9.52201 | 2.91E-12 | 3643278 |
| C5_00310C_A | -9.5222  | 8.65E-12 | 3641576 |
| FLU1        | -9.56398 | 2.18E-12 | 3637048 |
| C4_02850W_A | -9.57924 | 1.08E-19 | 3637910 |
| PTC8        | -9.6115  | 1.5E-17  | 3635674 |
| C4_06620C_A | -9.67103 | 2.09E-07 | 3642813 |
| CR_02550C_A | -9.73636 | 3.75E-12 | 3647689 |
| C6_02350C_A | -9.78863 | 4.48E-09 | 3645881 |
| UTP21       | -9.79052 | 7.79E-13 | 3635757 |
| C1_05440C_A | -9.7929  | 2.82E-15 | 3642489 |
| HPT1        | -9.79701 | 1.36E-15 | 3643034 |
| C6_00290W_A | -9.79724 | 1.34E-12 | 3646069 |
| C1_03830C_A | -9.82128 | 9.15E-11 | 3644678 |
| C2_06660W_A | -9.8213  | 3.95E-07 | 3648418 |
| CR_04240C_A | -9.86831 | 1.08E-19 | 3640989 |
| C1_08630W_A | -9.9404  | 1.75E-15 | 3634928 |
| C5_01610W_A | -9.96607 | 1.02E-07 | 3647251 |
| C1_10880W_A | -9.97277 | 4.36E-19 | 3644449 |
| C4_07150W_A | -10.0011 | 0.004305 | 3642935 |
| C6_02950C_A | -10.0096 | 5.6E-11  | 3639188 |
| DIM1        | -10.0389 | 5.73E-09 | 3636135 |
| C4_00490W_A | -10.0787 | 4.85E-09 | 3645013 |
| NRG1        | -10.0792 | 4.39E-21 | 3643166 |
| C7_00160C_A | -10.0803 | 1.22E-12 | 3637972 |
| C1_01160C_A | -10.0845 | 5.38E-14 | 3640204 |
| C1_12680W_A | -10.104  | 2.56E-17 | 3646833 |
| RRP8        | -10.1095 | 3.91E-13 | 3643900 |
| ECM22       | -10.1157 | 2.9E-19  | 3648000 |

|             |          |          |          |
|-------------|----------|----------|----------|
| C5_03510C_A | -10.1382 | 1.55E-10 | 3646969  |
| NBP35       | -10.1633 | 4.29E-18 | 3647412  |
| C3_07670W_A | -10.1647 | 1.14E-16 | 3638460  |
| MFG1        | -10.1776 | 1.05E-15 | 3643884  |
| IFA14       | -10.1817 | 1.16E-08 | 3639012  |
| POP4        | -10.1838 | 3.43E-09 | 3639241  |
| C1_07960W_A | -10.2234 | 9.76E-07 | 3640725  |
| C4_05350W_A | -10.2255 | 1.95E-18 | 3646948  |
| ELF1        | -10.2424 | 3.13E-24 | 3641903  |
| C2_06480W_A | -10.2512 | 3.84E-12 | 3646568  |
| HSP78       | -10.3007 | 2.65E-19 | 3637414  |
| C3_05460W_A | -10.3441 | 5.63E-11 | 3643670  |
| C3_01110C_A | -10.3469 | 0.009364 | 3639835  |
| C2_04700C_A | -10.3552 | 4.7E-06  | 3647794  |
| NOC2        | -10.52   | 1.14E-20 | 3647596  |
| LAS1        | -10.5248 | 3.75E-16 | 3644073  |
| CR_00310C_A | -10.563  | 8.25E-23 | 3639715  |
| SEN15       | -10.582  | 5.86E-06 | 3646411  |
| RTA3        | -10.6295 | 1.11E-10 | 3646566  |
| BMS1        | -10.7336 | 5.48E-20 | 3639857  |
| C3_02350W_A | -10.7391 | 1.62E-16 | 3636618  |
| C2_09880C_A | -10.744  | 1.26E-18 | 3643779  |
| C3_04730C_A | -10.7483 | 0.002572 | 3635250  |
| C6_01400W_A | -10.7504 | 0.002521 | 3641604  |
| C4_05330C_A | -10.7578 | 2.66E-09 | 3646959  |
| CNS1        | -10.7612 | 5.66E-15 | 3639365  |
| C7_01030C_A | -10.8182 | 2.64E-21 | 3638019  |
| C4_02260C_A | -10.8849 | 8.8E-11  | 3635690  |
| DRS1        | -10.8993 | 9.22E-18 | 3639045  |
| CR_00460C_A | -10.911  | 9.37E-11 | 3639726  |
| HNT1        | -10.9424 | 7.99E-20 | 3644441  |
| C1_08610C_A | -10.9478 | 4.61E-13 | 3646512  |
| C6_01040C_A | -10.9953 | 3.2E-14  | 3644014  |
| C2_03690C_A | -11.0203 | 1.54E-09 | 3637376  |
| QDR3        | -11.0694 | 7.14E-12 | 3644023  |
| GRF10       | -11.1697 | 5.49E-23 | 3636492  |
| CR_06230W_A | -11.2751 | 4.96E-09 | 3644867  |
| PET127      | -11.2782 | 9.14E-13 | 3644417  |
| RGS2        | -11.3139 | 7.2E-17  | 3646629  |
| C6_04200C_A | -11.3921 | 2.96E-08 | 30515344 |
| C3_05790C_A | -11.4826 | 2.53E-07 | 3641753  |
| ZCF2        | -11.489  | 5.9E-30  | 3642484  |
| UGA3        | -11.5291 | 9.72E-19 | 3638926  |
| HEM3        | -11.5425 | 6.11E-15 | 3643940  |
| C3_07570C_A | -11.5707 | 5.46E-14 | 3638522  |
| C3_06370C_A | -11.6498 | 1.37E-18 | 3642258  |
| SPB4        | -11.6848 | 6.55E-13 | 3647252  |

|             |          |          |         |
|-------------|----------|----------|---------|
| C1_10360C_A | -11.698  | 2.72E-26 | 3634836 |
| C3_06940W_A | -11.7219 | 3.3E-28  | 3638509 |
| C4_05010W_A | -11.8074 | 7.84E-11 | 3641148 |
| SNQ2        | -11.8449 | 7.32E-23 | 3640290 |
| LTV1        | -11.8516 | 4.56E-16 | 3639016 |
| SPB1        | -11.9103 | 1.11E-19 | 3648179 |
| MAK21       | -11.9223 | 1.88E-25 | 3635147 |
| CSI2        | -11.9359 | 2.2E-09  | 3642016 |
| CR_01410C_A | -12.0535 | 2.19E-11 | 3640136 |
| C7_04090C_A | -12.1213 | 4.28E-18 | 3643135 |
| C1_11510C_A | -12.1283 | 4.8E-12  | 3645336 |
| MPP10       | -12.1635 | 1.48E-25 | 3647912 |
| C4_00690C_A | -12.2191 | 4.53E-06 | 3645752 |
| C1_07660W_A | -12.2367 | 2.83E-09 | 3646656 |
| C5_05340W_A | -12.2583 | 6.32E-17 | 3636400 |
| SSU81       | -12.3022 | 3.82E-16 | 3634944 |
| C1_01620C_A | -12.4339 | 4.57E-17 | 3640193 |
| NOG1        | -12.4592 | 9.45E-24 | 3641736 |
| C5_03080C_A | -12.4742 | 6.29E-25 | 3637701 |
| C2_06520C_A | -12.5145 | 5.3E-09  | 3646571 |
| C2_05810W_A | -12.5208 | 9.87E-17 | 3647481 |
| CR_04710W_A | -12.5878 | 0.000118 | 3648141 |
| C2_08180C_A | -12.6129 | 8.31E-16 | 3642317 |
| C7_01910C_A | -12.6273 | 3.78E-20 | 3637029 |
| UTP4        | -12.6487 | 4.2E-19  | 3636657 |
| C4_02770C_A | -12.7034 | 2.68E-11 | 3637903 |
| RRN3        | -12.7307 | 1.08E-18 | 3647925 |
| CTA8        | -12.7415 | 3.43E-18 | 3634947 |
| C3_05160C_A | -12.7562 | 6.87E-25 | 3635229 |
| DBP8        | -12.7896 | 3.31E-13 | 3646692 |
| C2_06530W_A | -12.8026 | 3.22E-13 | 3646572 |
| C2_10090C_A | -12.9111 | 4.75E-13 | 3643939 |
| NOP8        | -12.9488 | 4.96E-17 | 3646290 |
| DED1        | -13.0438 | 7.34E-27 | 3641752 |
| C5_01430C_A | -13.0531 | 6.09E-11 | 3647056 |
| MTG2        | -13.1058 | 8.82E-13 | 3646693 |
| C1_06440C_A | -13.1815 | 6.73E-11 | 3639552 |
| NOP15       | -13.1886 | 4.46E-13 | 3637966 |
| SDA1        | -13.1985 | 3.42E-20 | 3646688 |
| CHR1        | -13.2366 | 3.98E-26 | 3647601 |
| C5_04380C_A | -13.2395 | 8.42E-10 | 3636485 |
| TPS3        | -13.274  | 2.2E-14  | 3641205 |
| C7_02340C_A | -13.2914 | 1.1E-09  | 3636933 |
| FGR47       | -13.3632 | 3.29E-27 | 3641651 |
| C5_01990W_A | -13.3912 | 0.001308 | 3643774 |
| CR_04250W_A | -13.4831 | 0.021365 | 3640990 |
| C4_07000W_A | -13.4832 | 0.02124  | 3642967 |



|             |          |          |         |
|-------------|----------|----------|---------|
| CR_01250C_A | -13.484  | 0.02163  | 3640403 |
| CR_06870C_A | -13.484  | 0.022475 | 3647318 |
| UTP9        | -13.5044 | 6.13E-19 | 3638451 |
| KRR1        | -13.5425 | 4.11E-14 | 3644542 |
| C2_02190C_A | -13.5904 | 1.01E-17 | 3635753 |
| CR_09930W_A | -13.6449 | 7.18E-27 | 3639029 |
| RNR3        | -13.7154 | 5.12E-15 | 3647591 |
| POP3        | -13.7483 | 5.65E-10 | 3638993 |
| HSP31       | -13.7534 | 1.57E-12 | 3644589 |
| MSS116      | -13.7667 | 1.01E-26 | 3634792 |
| C2_05160C_A | -13.7735 | 6.66E-29 | 3643461 |
| C1_09710C_A | -13.8655 | 4.78E-23 | 3634818 |
| SCH9        | -13.9084 | 2.92E-28 | 3637421 |
| COX11       | -13.9573 | 1.73E-19 | 3646842 |
| C6_04530C_A | -13.9645 | 2.26E-26 | 3645970 |
| RPC10       | -14.0736 | 3.28E-15 | 3643292 |
| CR_04920W_A | -14.1145 | 3.68E-20 | 3648207 |
| C3_02020W_A | -14.1834 | 3.54E-22 | 3636592 |
| CR_07030C_A | -14.1989 | 6.57E-10 | 3645730 |
| GPD1        | -14.226  | 9.76E-19 | 3643924 |
| C3_07400W_A | -14.2405 | 5.82E-15 | 3638471 |
| SLY41       | -14.3208 | 1.13E-32 | 3647139 |
| ALD6        | -14.3249 | 1.22E-17 | 3647407 |
| C2_04080W_A | -14.5136 | 1.51E-19 | 3637381 |
| C2_09160W_A | -14.5728 | 1.53E-10 | 3644090 |
| NOG2        | -14.6034 | 2.65E-19 | 3640299 |
| C5_01710C_A | -14.6149 | 1.18E-11 | 3643732 |
| NAN1        | -14.7517 | 2.61E-18 | 3637932 |
| SGD1        | -14.7596 | 2.32E-23 | 3643191 |
| NOP14       | -14.779  | 1.93E-21 | 3635266 |
| C2_10810W_A | -14.787  | 6.83E-17 | 3641243 |
| BUD22       | -14.9158 | 2.22E-21 | 3640391 |
| C2_04670W_A | -14.9558 | 2.15E-14 | 3647789 |
| NMD3        | -15.0082 | 1.37E-20 | 3646614 |
| UTP5        | -15.0602 | 1.54E-21 | 3638922 |
| CR_08080W_A | -15.1329 | 0.000139 | 3642094 |
| SPO11       | -15.1329 | 0.000141 | 3643873 |
| C3_03460C_A | -15.1529 | 2.59E-13 | 3638359 |
| C3_01560W_A | -15.3256 | 1.02E-20 | 3636669 |
| RRP15       | -15.3413 | 1.49E-16 | 3648397 |
| CIC1        | -15.533  | 1.44E-15 | 3644059 |
| NOC4        | -15.5621 | 5.56E-18 | 3645224 |
| C5_03920C_A | -15.5857 | 5.37E-17 | 3647448 |
| YVH1        | -15.6581 | 1.99E-08 | 3643218 |
| C3_07070C_A | -15.702  | 1.99E-13 | 3638446 |
| TSR1        | -15.7903 | 2.38E-28 | 3642135 |
| NIP7        | -15.8459 | 1.15E-12 | 3645880 |

|             |          |          |          |
|-------------|----------|----------|----------|
| RRP9        | -15.9323 | 5.15E-16 | 3642576  |
| C1_07950C_A | -15.9913 | 2.54E-10 | 3640724  |
| CR_02420W_A | -16.0051 | 2.1E-17  | 3644926  |
| C3_06950W_A | -16.1964 | 3.01E-17 | 3638507  |
| C2_09500W_A | -16.2572 | 1.17E-19 | 3643817  |
| C7_00330C_A | -16.4535 | 1.74E-15 | 3638042  |
| RSM22       | -16.5035 | 6.05E-18 | 3642506  |
| C6_03210C_A | -16.6964 | 1.18E-08 | 3639178  |
| C7_02600C_A | -16.7432 | 2.65E-21 | 3648286  |
| PGA37       | -16.7554 | 1.42E-10 | 3636484  |
| C2_05330C_A | -16.8714 | 6.92E-21 | 3643426  |
| C4_04810C_A | -16.8881 | 5.88E-16 | 3641112  |
| C3_05800W_A | -16.9435 | 2.8E-19  | 3641754  |
| C2_02580W_A | -17.0555 | 7.91E-17 | 3635860  |
| NCS2        | -17.3483 | 3.19E-27 | 3643216  |
| C1_01610C_A | -17.3672 | 1.05E-11 | 3640225  |
| ALS7        | -17.4266 | 6.98E-29 | 3642234  |
| C6_03200W_A | -17.4288 | 7.44E-29 | 3639177  |
| SMM1        | -17.4996 | 1.68E-18 | 3643778  |
| C5_00810C_A | -17.5007 | 0.008647 | 3644127  |
| C3_04870W_A | -17.5007 | 0.008679 | 3635226  |
| C1_03840W_A | -17.5007 | 0.008709 | 30514984 |
| C7_03550C_A | -17.5018 | 0.010469 | 3646235  |
| NSA2        | -17.5178 | 9.32E-22 | 3642259  |
| CR_08500W_A | -17.7038 | 9.37E-20 | 3642136  |
| HWP2        | -17.7558 | 0.000163 | 3646803  |
| GCS1        | -17.8495 | 9.78E-28 | 3640742  |
| CR_09800C_A | -17.9333 | 3.15E-35 | 3638984  |
| C3_06760W_A | -17.9505 | 9.57E-14 | 3638502  |
| CR_07500W_A | -18.143  | 0.015964 | 3647997  |
| C6_00530C_A | -18.1777 | 1.99E-07 | 30515326 |
| CR_10470C_A | -18.2188 | 1.34E-26 | 3638979  |
| RPA12       | -18.2297 | 2.17E-09 | 3643477  |
| CR_08580C_A | -18.2655 | 5.79E-11 | 3642105  |
| CR_01710W_A | -18.2656 | 7.91E-11 | 3640130  |
| RFX1        | -18.2666 | 1.94E-13 | 3644844  |
| RMS1        | -18.3131 | 7.84E-17 | 3646361  |
| C1_10970W_A | -18.3395 | 2.71E-26 | 3644427  |
| CLG1        | -18.4199 | 1.46E-40 | 3646030  |
| C1_01510W_A | -18.5779 | 1.97E-26 | 3640229  |
| C4_03350C_A | -18.6122 | 1.1E-15  | 3646794  |
| C1_04710C_A | -18.6709 | 5.33E-14 | 3644764  |
| C1_05330C_A | -18.7429 | 4.16E-20 | 3642485  |
| ROA1        | -18.8426 | 1.96E-39 | 3645424  |
| C1_09330W_A | -18.959  | 3.28E-09 | 3634802  |
| C1_01150C_A | -19.0501 | 3.77E-29 | 3640203  |
| C1_13130C_A | -19.1446 | 8.94E-21 | 3636202  |

|             |          |          |          |
|-------------|----------|----------|----------|
| C6_02230W_A | -19.169  | 4.3E-28  | 3645866  |
| C2_00410C_A | -19.3411 | 1.3E-31  | 3638820  |
| HCA4        | -19.4615 | 7.82E-29 | 3637911  |
| C1_06350W_A | -19.5393 | 5.75E-29 | 3639562  |
| C1_04040C_A | -19.7298 | 1.38E-25 | 3646429  |
| C3_06160C_A | -19.7801 | 1.62E-20 | 3641766  |
| C4_02740W_A | -19.822  | 1.14E-32 | 3637855  |
| NSA1        | -19.8646 | 2.08E-16 | 3642313  |
| DBP7        | -19.8757 | 4.24E-30 | 3645903  |
| C2_01060C_A | -20.1568 | 2.68E-10 | 3638835  |
| FAR1        | -20.1804 | 5.17E-13 | 3637970  |
| RCH1        | -20.3613 | 1.05E-18 | 3645002  |
| CR_03360W_A | -20.3742 | 2.26E-20 | 3645141  |
| HSP70       | -20.4654 | 1.11E-30 | 3636229  |
| C1_11000C_A | -20.7538 | 2.8E-15  | 3644422  |
| GST2        | -20.9614 | 3.7E-21  | 3637937  |
| RIM8        | -21.1576 | 4.77E-33 | 3639342  |
| UTP18       | -21.4788 | 1.33E-26 | 3643123  |
| PRM9        | -21.5198 | 0.006705 | 30515173 |
| DIP2        | -22.1038 | 1.1E-24  | 3640762  |
| C2_03110W_A | -22.1946 | 0.000203 | 3642995  |
| SSF1        | -22.2345 | 6.48E-19 | 3647085  |
| C6_00810C_A | -22.2948 | 9.82E-19 | 3647068  |
| C2_04570W_A | -22.301  | 6.51E-24 | 3645441  |
| PIR1        | -22.4254 | 1.42E-43 | 3645801  |
| NOP13       | -22.4908 | 2.07E-26 | 3638469  |
| FTH1        | -22.5468 | 1.35E-31 | 3634852  |
| C3_01540W_A | -22.565  | 2.78E-07 | 3636567  |
| NOP4        | -22.7012 | 2.11E-36 | 3647991  |
| BUD21       | -22.8558 | 1.17E-18 | 3640541  |
| TSR2        | -22.9556 | 9.34E-17 | 3636845  |
| SRP40       | -23.1829 | 7.72E-29 | 3642605  |
| C1_01130W_A | -23.5835 | 1.02E-45 | 3640178  |
| DBP3        | -23.7559 | 1.49E-24 | 3634868  |
| ELA1        | -24.1575 | 5.18E-15 | 3644680  |
| SAS10       | -25.351  | 6.94E-34 | 3637899  |
| C6_03810W_A | -25.5906 | 1.92E-29 | 3640286  |
| C2_09660W_A | -25.7975 | 5.27E-24 | 3643793  |
| PRX1        | -26.0549 | 4.94E-26 | 3641357  |
| C2_04120C_A | -26.171  | 3.46E-21 | 3637377  |
| MAK5        | -26.1875 | 8.44E-27 | 3643454  |
| ENP1        | -26.1882 | 5.6E-20  | 3647861  |
| ENP2        | -26.2076 | 9.78E-24 | 3646234  |
| C4_07140W_A | -26.4191 | 2.51E-40 | 3642936  |
| CR_06550C_A | -26.4801 | 5.08E-21 | 3645260  |
| CR_01600C_A | -26.5908 | 1.38E-12 | 3640080  |
| PGA57       | -26.8176 | 9.36E-07 | 3635608  |

|             |          |          |         |
|-------------|----------|----------|---------|
| RMP1        | -26.9615 | 0.00014  | 3636215 |
| CDR4        | -26.9629 | 3.61E-26 | 3640711 |
| CFL4        | -27.1762 | 1.77E-11 | 3642639 |
| KTI12       | -27.3352 | 2.15E-15 | 3645140 |
| CR_02030C_A | -27.3929 | 1.9E-19  | 3640152 |
| C1_10950C_A | -27.6652 | 2.36E-29 | 3644428 |
| UTP22       | -27.6796 | 4.48E-28 | 3635760 |
| FYV5        | -27.9514 | 4.82E-10 | 3647057 |
| CR_04110W_A | -28.4827 | 2E-21    | 3641026 |
| HSP21       | -28.6038 | 5.05E-27 | 3637364 |
| BMT1        | -30.1427 | 4.7E-43  | 3638535 |
| CR_06140W_A | -30.2081 | 1.29E-21 | 3644862 |
| C4_03340C_A | -31.5681 | 4.78E-11 | 3648090 |
| C1_09770W_A | -31.5837 | 4.36E-24 | 3634825 |
| FTR1        | -32.455  | 2.55E-30 | 3643318 |
| C2_08580W_A | -32.9046 | 1.04E-05 | 3643916 |
| C2_07070W_A | -33.1047 | 1.62E-32 | 3643501 |
| EBP1        | -33.2159 | 2.09E-18 | 3644060 |
| C1_06430C_A | -33.5646 | 0.001257 | 3639553 |
| C1_12440W_A | -33.5714 | 0.001142 | 3642012 |
| CR_01510C_A | -33.5714 | 0.001146 | 3640104 |
| C7_00770W_A | -34.1583 | 1.35E-25 | 3637959 |
| C5_02590C_A | -34.8284 | 4.56E-16 | 3637723 |
| C6_03360C_A | -35.5903 | 5.17E-08 | 3639203 |
| C1_07790C_A | -36.3459 | 6.24E-17 | 3640706 |
| RRS1        | -36.3897 | 3.39E-20 | 3639352 |
| C1_13820C_A | -36.4363 | 1.85E-23 | 3636127 |
| RPN4        | -36.5326 | 2.73E-43 | 3644684 |
| CTA4        | -36.5808 | 4.76E-39 | 3641743 |
| FMP45       | -36.7802 | 3.39E-31 | 3637004 |
| SEN2        | -36.8319 | 2.86E-19 | 3637832 |
| C1_02450C_A | -37.8171 | 1.08E-11 | 3636849 |
| C2_05840W_A | -37.8457 | 6.07E-20 | 3647484 |
| C6_01870C_A | -39.0874 | 2.54E-20 | 3641625 |
| QDR2        | -39.4927 | 2.96E-37 | 3643661 |
| KSP1        | -39.662  | 1.06E-40 | 3644467 |
| C6_03180C_A | -40.0169 | 6.41E-61 | 3639261 |
| WOR2        | -40.0503 | 4.19E-14 | 3635230 |
| C2_05750W_A | -40.4916 | 2.01E-26 | 3645577 |
| CR_04940W_A | -41.4118 | 4.3E-11  | 3648209 |
| C5_04910W_A | -41.4733 | 1.09E-06 | 3636417 |
| C4_00810C_A | -41.4926 | 1.42E-10 | 3645742 |
| C6_03440W_A | -42.2797 | 8.3E-21  | 3640274 |
| GIT3        | -43.0088 | 1.77E-35 | 3642634 |
| C1_06760C_A | -45.5875 | 5.64E-26 | 3639505 |
| HGT17       | -45.613  | 0.000304 | 3635687 |
| C3_02040C_A | -45.896  | 2.85E-24 | 3636579 |

|             |          |          |          |
|-------------|----------|----------|----------|
| KAR4        | -47.2785 | 7.84E-10 | 3644937  |
| C3_00230C_A | -47.9096 | 3.92E-07 | 3640557  |
| ZCF1        | -48.0981 | 2.61E-60 | 3638329  |
| C2_08260W_A | -48.7315 | 5.17E-10 | 3642345  |
| C4_04520W_A | -49.049  | 1.37E-32 | 3641110  |
| C1_00190C_A | -49.1348 | 9.05E-30 | 3639337  |
| C7_03850W_A | -52.2812 | 5.9E-20  | 3643145  |
| KTI11       | -53.6461 | 0.000134 | 30515125 |
| C7_00880C_A | -54.2473 | 3.02E-46 | 3638052  |
| FRE10       | -55.4065 | 2.43E-23 | 3646841  |
| ECM1        | -55.8081 | 9.19E-13 | 3641224  |
| HBR3        | -57.8144 | 1.47E-33 | 3645652  |
| REI1        | -59.7964 | 1.63E-25 | 3647536  |
| C7_01680C_A | -60.0243 | 3.31E-45 | 3636981  |
| C3_01430W_A | -66.2648 | 4.94E-11 | 3636633  |
| ARG11       | -69.7215 | 2.26E-05 | 3635193  |
| C2_02130C_A | -70.2381 | 1.83E-14 | 3635747  |
| C2_08530C_A | -73.2969 | 1.13E-08 | 3643921  |
| NOP6        | -74.4329 | 1.1E-17  | 3639507  |
| C5_03440W_A | -75.7525 | 3.46E-09 | 30515310 |
| CR_01530C_A | -78.0126 | 7.5E-15  | 3640072  |
| MAK16       | -80.1246 | 1.51E-26 | 3646920  |
| C3_04510W_A | -84.3182 | 2.05E-09 | 3635258  |
| RME1        | -99.7606 | 9.87E-51 | 3644453  |
| C7_01430C_A | -100.19  | 2.98E-53 | 3636961  |
| AAH1        | -109.879 | 1.94E-06 | 3643529  |
| SSU1        | -120.189 | 1.02E-52 | 3641882  |
| GPI1        | -127.682 | 3.17E-20 | 3643680  |
| YWP1        | -156.447 | 1.57E-72 | 3643915  |
| CR_08880C_A | -231.101 | 3.16E-19 | 3641878  |
| CR_00840C_A | -235.678 | 0.042954 | 3640411  |
| CR_03320C_A | -249.101 | 0.044671 | 3645096  |
| C3_00120W_A | -267.706 | 0.037777 | 3640566  |
| C1_02690C_A | -269.513 | 0.038482 | 3636823  |
| C5_04030W_A | -324.073 | 6.12E-26 | 3647737  |
| FRE9        | -356.356 | 5.44E-16 | 3643452  |
| C2_02640C_A | -459.923 | 0.021892 | 30515095 |
| MNN1        | -507.485 | 1.09E-10 | 3637784  |
| C1_11410C_A | -523.961 | 0.018969 | 30515054 |
| C4_06910W_A | -540.981 | 1.14E-10 | 3642933  |
| C1_09820C_A | -556.015 | 0.017898 | 3634846  |
| C3_06170C_A | -652.188 | 0.015093 | 3642272  |
| HSP30       | -892.042 | 7.19E-59 | 3645419  |
| C7_03560W_A | -943.888 | 4.59E-53 | 3646236  |
| CRZ2        | -1002.48 | 1.51E-56 | 3645725  |
| C4_07260W_A | -1581.44 | 0.00555  | 3642942  |
| PHO87       | -2061.12 | 0.004023 | 3639861  |

|             |          |          |          |
|-------------|----------|----------|----------|
| C1_14630C_A | -23084   | 0.000165 | 3643291  |
| TAR1        | -57898.3 | 9.7E-262 | 30515449 |

### S120 vs Control

| Name        | Fold change | P-value  | GeneID   |
|-------------|-------------|----------|----------|
| ECE1        | 25907.67    | 1.01E-08 | 3646814  |
| HWP1        | 7404.873    | 2.04E-23 | 3645372  |
| C1_04180W_A | 1816.104    | 2.43E-05 | 3644716  |
| C1_13100W_A | 1182.998    | 7.1E-05  | 30515073 |
| SAP5        | 1155.91     | 7.76E-05 | 3639268  |
| ECM331      | 1139.382    | 7.78E-05 | 3637731  |
| HGT12       | 1123.753    | 8.72E-05 | 3638048  |
| CRH11       | 921.141     | 6.3E-14  | 3637905  |
| HHT21       | 649.5999    | 4.33E-13 | 3644707  |
| CDC11       | 624.8933    | 0.000287 | 3647888  |
| MAL31       | 314.4351    | 4.34E-10 | 3636420  |
| HYR1        | 286.334     | 1.01E-09 | 3636226  |
| C4_05390W_A | 280.3652    | 0.001459 | 3646951  |
| SOD5        | 269.1401    | 4.52E-56 | 3638886  |
| SAP6        | 238.1401    | 1.84E-09 | 3639229  |
| ALS3        | 215.2594    | 1.3E-130 | 3647965  |
| MLC1        | 214.0555    | 0.002574 | 30515387 |
| PGA6        | 208.5507    | 3.75E-09 | 3634774  |
| CDC10       | 201.5065    | 3.13E-09 | 3640947  |
| TUB2        | 194.6661    | 6.83E-19 | 3639329  |
| VMA10       | 186.9686    | 0.003166 | 3645215  |
| ALI1        | 172.8347    | 0.003684 | 3636635  |
| C5_03000C_A | 158.7864    | 0.0042   | 3637818  |
| CR_06500C_A | 153.8465    | 0.004467 | 3645274  |
| DPM2        | 150.6277    | 0.004602 | 30515325 |
| COG4        | 139.7331    | 0.005293 | 3645571  |
| CR_06380C_A | 139.0102    | 0.005344 | 3648139  |
| C6_00400C_A | 138.2382    | 0.005409 | 3646087  |
| HHT2        | 136.9696    | 3.47E-20 | 3647326  |
| C6_02140W_A | 132.4267    | 0.005767 | 3645886  |
| C3_02620C_A | 132.1478    | 0.005784 | 3638326  |
| HTA2        | 131.0766    | 2.85E-19 | 3644715  |
| C3_07840C_A | 130.268     | 0.006076 | 3647465  |
| SHE3        | 128.3289    | 6.45E-08 | 3639277  |
| FGR6-10     | 118.1774    | 0.007118 | 3641770  |
| SAM51       | 117.9032    | 0.007174 | 3641582  |
| C3_06670C_A | 115.0742    | 0.007399 | 3642254  |
| C1_03150C_A | 114.9287    | 0.007679 | 30514976 |
| CR_05310W_A | 108.351     | 0.008305 | 3648125  |
| HRT2        | 103.9582    | 2.18E-07 | 3635709  |
| C6_02180W_A | 103.3995    | 0.008951 | 3645861  |
| ERG11       | 102.2612    | 4.15E-21 | 3641571  |

|             |          |          |          |
|-------------|----------|----------|----------|
| CCN1        | 101.4518 | 0.009144 | 3643735  |
| C4_02460W_A | 101.3564 | 0.009187 | 3637844  |
| FGR41       | 100.4444 | 9.5E-07  | 3634839  |
| DPM1        | 97.62307 | 3.42E-07 | 3640700  |
| C6_00710W_A | 96.36837 | 0.009961 | 3647073  |
| TUB1        | 96.11569 | 1.23E-26 | 3641930  |
| C3_06750W_A | 95.17098 | 0.010596 | 30515219 |
| ASM3        | 91.8097  | 1.48E-10 | 3639332  |
| ERG28       | 90.26678 | 0.011351 | 3638833  |
| EXG2        | 88.58708 | 8.96E-14 | 3636816  |
| ERG6        | 87.3051  | 2.67E-16 | 3636655  |
| UME6        | 86.95036 | 6.1E-07  | 3647522  |
| MCD4        | 86.85311 | 0.012043 | 3642036  |
| PHR1        | 86.45929 | 2.06E-62 | 3641108  |
| PGA31       | 82.6682  | 0.012841 | 3641226  |
| PGA45       | 81.41293 | 7.67E-07 | 3639875  |
| PGA23       | 81.22544 | 0.014881 | 3644941  |
| FRP2        | 79.83861 | 1.1E-15  | 3638008  |
| GUP1        | 78.9468  | 0.01394  | 3636171  |
| C5_02780W_A | 74.29708 | 0.015215 | 3637803  |
| RBT4        | 73.36206 | 4.79E-20 | 3639534  |
| HHO1        | 72.85366 | 3.31E-13 | 30515358 |
| TOS1        | 72.37178 | 3.06E-50 | 3636566  |
| CR_04650W_A | 72.20191 | 0.017014 | 30515396 |
| LSC1        | 70.52083 | 1.17E-22 | 3640199  |
| FAD1        | 67.96825 | 0.017774 | 3634930  |
| TUB4        | 65.61016 | 0.018784 | 3641774  |
| C7_01100C_A | 63.88077 | 0.019632 | 3637948  |
| C4_02600C_A | 63.87914 | 0.019579 | 3637912  |
| C1_11950W_A | 63.67502 | 0.019673 | 3642045  |
| YNK1        | 63.06106 | 8.6E-19  | 3637746  |
| C1_10560C_A | 60.08761 | 0.021394 | 3647196  |
| C1_02100W_A | 59.04022 | 0.02199  | 3644578  |
| C2_09590C_A | 58.50324 | 0.022795 | 3643800  |
| PGA34       | 58.43625 | 0.022476 | 3642579  |
| C2_10010C_A | 57.24483 | 0.023033 | 3643962  |
| CR_10130W_A | 56.9033  | 0.023669 | 3638970  |
| C1_06250W_A | 56.80114 | 0.023309 | 3647525  |
| C3_07130W_A | 56.64197 | 0.024334 | 3638440  |
| POL30       | 56.52391 | 6.2E-06  | 3635583  |
| HHF1        | 56.35825 | 8.51E-25 | 3644705  |
| OST1        | 56.1464  | 6.44E-06 | 3643657  |
| C1_07490C_A | 56.08034 | 0.023845 | 3646666  |
| PGA38       | 55.34272 | 1.66E-09 | 3637846  |
| TEM1        | 55.25356 | 0.02436  | 3636923  |
| C2_05510C_A | 55.24473 | 0.024088 | 3643420  |
| C3_01020W_A | 55.18658 | 8.19E-09 | 3639828  |

|             |          |          |          |
|-------------|----------|----------|----------|
| DDR48       | 55.07801 | 2.83E-25 | 3644061  |
| CR_04490C_A | 54.85898 | 0.024242 | 3641013  |
| C1_03600W_A | 54.46304 | 7.46E-06 | 3636880  |
| C3_01100W_A | 54.39344 | 0.024729 | 3639834  |
| AGM1        | 53.0375  | 8.69E-06 | 3636138  |
| FGR6-3      | 50.78609 | 0.027157 | 3647954  |
| C2_02050C_A | 50.38293 | 1.75E-08 | 3635851  |
| MCD1        | 50.05062 | 0.027626 | 3639044  |
| CDC28       | 48.78972 | 1.41E-05 | 3644838  |
| C4_04380C_A | 46.88121 | 1.62E-05 | 30515266 |
| ERG26       | 46.51957 | 5.62E-11 | 3642803  |
| C1_06700W_A | 45.81408 | 1.88E-05 | 3639511  |
| ERV46       | 45.61996 | 2.43E-08 | 3644129  |
| PRI2        | 44.94446 | 0.032106 | 3642788  |
| C2_09960W_A | 44.43002 | 0.032904 | 3643821  |
| CWH43       | 44.17237 | 1.63E-10 | 3640389  |
| C2_05720C_A | 44.16518 | 1.83E-10 | 3645574  |
| SNZ1        | 44.09828 | 2.35E-10 | 3636803  |
| BIO2        | 43.50852 | 2.63E-05 | 3640106  |
| C2_02330W_A | 42.04205 | 0.03553  | 3635811  |
| RBT1        | 41.93871 | 7.87E-10 | 3645377  |
| GIG1        | 41.61863 | 0.03588  | 3644712  |
| C1_07920W_A | 41.57404 | 0.035905 | 30515026 |
| ERG10       | 41.48762 | 6.02E-30 | 3648275  |
| RFA2        | 40.99916 | 3.42E-05 | 3643506  |
| C1_06050C_A | 40.92611 | 3.38E-05 | 30515003 |
| KAR3        | 40.62909 | 0.037203 | 3644078  |
| C5_03930C_A | 40.35438 | 3.3E-10  | 3647447  |
| CHT3        | 40.24288 | 2.63E-10 | 3638967  |
| C3_02330C_A | 40.23604 | 0.037948 | 3636550  |
| C3_02530W_A | 39.71833 | 0.038236 | 30515189 |
| CWH8        | 39.18072 | 0.039976 | 3644598  |
| CFL11       | 38.69454 | 6.88E-08 | 3646622  |
| DAD3        | 38.16401 | 0.041657 | 3644864  |
| ARF3        | 37.93858 | 4.19E-05 | 3636628  |
| PMI1        | 37.87707 | 7.52E-08 | 3643795  |
| DOG1        | 37.72422 | 4.31E-05 | 3641597  |
| CR_01910C_A | 37.41502 | 0.041733 | 3640095  |
| CR_00280C_A | 37.40695 | 0.041702 | 3639719  |
| CHO1        | 37.19543 | 1.03E-11 | 3644557  |
| C6_00120W_A | 36.80473 | 0.042757 | 30515323 |
| ARC18       | 36.73014 | 0.043062 | 3644056  |
| C6_00660C_A | 36.40552 | 0.043704 | 3647133  |
| DPP3        | 36.19875 | 4.55E-12 | 3636942  |
| CR_06170W_A | 35.89784 | 5.47E-05 | 3644865  |
| HTA1        | 35.74504 | 4.36E-20 | 3645658  |
| C6_02210W_A | 35.47551 | 0.044884 | 3645864  |



|             |          |          |          |
|-------------|----------|----------|----------|
| CBR1        | 35.30851 | 3.64E-13 | 3646961  |
| ERG2        | 35.15236 | 7.4E-05  | 3639347  |
| C6_02100W_A | 35.14137 | 2.01E-15 | 3647554  |
| ASF1        | 35.04437 | 0.045708 | 3647348  |
| C1_11940C_A | 35.00655 | 0.045754 | 3642046  |
| APE3        | 34.81753 | 4.88E-09 | 3643875  |
| C1_03940W_A | 34.61904 | 1.6E-07  | 3646415  |
| C7_02310C_A | 34.56738 | 0.046743 | 3636936  |
| ATO1        | 34.33794 | 9.59E-12 | 3647761  |
| ACP12       | 34.07311 | 9.03E-05 | 3637361  |
| IHD1        | 33.85754 | 8.97E-38 | 3640291  |
| ECM33       | 33.55228 | 1.06E-46 | 30514977 |
| PTP3        | 33.16464 | 1.2E-38  | 3638940  |
| C3_07540C_A | 33.12279 | 0.049445 | 3638526  |
| PMM1        | 32.85381 | 9.18E-11 | 3636852  |
| ATP18       | 32.54227 | 8.66E-05 | 30515084 |
| SSR1        | 32.29718 | 2.67E-16 | 3638055  |
| PLB5        | 31.14378 | 5.43E-17 | 3640750  |
| MAL2        | 30.35605 | 6.37E-13 | 3638946  |
| C5_02380W_A | 30.35272 | 3.3E-46  | 3637794  |
| CYB5        | 29.53665 | 9.24E-07 | 3637965  |
| PDI1        | 29.43708 | 1.59E-20 | 3641367  |
| ATP19       | 29.28343 | 0.00017  | 30515061 |
| C3_07470W_A | 29.14874 | 4.16E-08 | 3638479  |
| HHF22       | 29.05323 | 1.45E-17 | 3647327  |
| CHS1        | 28.9221  | 1.59E-12 | 3641364  |
| HOM6        | 28.75685 | 0.000174 | 3636815  |
| C3_02140C_A | 28.74908 | 6.33E-09 | 3636656  |
| ERG13       | 28.74396 | 2.36E-16 | 3641881  |
| BGL2        | 28.56694 | 1.92E-31 | 3635691  |
| HGT1        | 27.8786  | 2.74E-41 | 3645420  |
| CR_00990W_A | 27.50132 | 0.000198 | 3640425  |
| FAV2        | 27.49754 | 0.000213 | 3647236  |
| SGA1        | 27.35965 | 4E-10    | 3636652  |
| C1_02730W_A | 27.0026  | 0.00022  | 3636826  |
| ATP1        | 26.88715 | 2.26E-44 | 3646134  |
| RFX2        | 26.75059 | 2.81E-10 | 3635658  |
| HGT3        | 26.74329 | 0.000227 | 3643185  |
| CSA1        | 26.6084  | 8.16E-30 | 3638009  |
| CR_05500C_A | 26.27493 | 0.000245 | 3647598  |
| EMP24       | 26.21191 | 1.58E-06 | 3647247  |
| GFA1        | 25.70344 | 1.44E-36 | 3636557  |
| ASK1        | 25.63726 | 0.000287 | 3635656  |
| SEC21       | 25.54321 | 1.14E-15 | 3644786  |
| C6_02190C_A | 25.44161 | 2.24E-06 | 3645862  |
| LSC2        | 24.68975 | 1.29E-28 | 3646618  |
| CR_00910W_A | 24.63013 | 3.19E-22 | 30515371 |

|             |          |          |          |
|-------------|----------|----------|----------|
| CYT1        | 24.62745 | 8.31E-17 | 3643441  |
| PGA10       | 24.48807 | 3.66E-06 | 3645009  |
| PMT2        | 24.39702 | 6.78E-18 | 3638538  |
| C1_14060W_A | 24.33172 | 3.06E-21 | 3643344  |
| CR_09330C_A | 24.28902 | 6.56E-17 | 3641899  |
| SOL3        | 24.26504 | 2.84E-08 | 3646625  |
| SOD1        | 24.21585 | 1.53E-10 | 30515248 |
| RAD54       | 24.19249 | 0.000358 | 3636192  |
| C4_00710W_A | 24.04229 | 4.01E-06 | 3645750  |
| SEC22       | 23.88488 | 0.0004   | 30515391 |
| ERV25       | 23.88412 | 1.05E-09 | 3642243  |
| C1_09060C_A | 23.00268 | 0.000517 | 3634772  |
| ARO9        | 22.92479 | 6.56E-11 | 3641773  |
| C2_07650C_A | 22.84799 | 5.39E-06 | 3642342  |
| C5_05200C_A | 22.78496 | 4.86E-11 | 3636467  |
| COX5        | 22.62841 | 5.83E-16 | 3634768  |
| THR1        | 22.47825 | 0.000574 | 3641572  |
| CHT2        | 22.47542 | 1.48E-15 | 3636523  |
| QCR2        | 22.44674 | 2.71E-17 | 3646352  |
| CR_09560C_A | 22.24308 | 0.000589 | 3647099  |
| SEC23       | 22.19735 | 3.11E-17 | 3641818  |
| PGA54       | 22.03231 | 5.58E-17 | 3637929  |
| MSB1        | 21.70079 | 1.16E-10 | 3648218  |
| CDC12       | 21.60917 | 3.66E-17 | 3636809  |
| OSH3        | 21.58983 | 6.34E-13 | 3645368  |
| C5_02920W_A | 21.56556 | 0.000647 | 3637751  |
| ERV29       | 21.53349 | 1.24E-10 | 3635672  |
| SSA2        | 21.30595 | 1.76E-14 | 3644711  |
| C5_01230C_A | 21.2183  | 1.34E-11 | 3642618  |
| C1_02760W_A | 21.21827 | 2.36E-09 | 3636870  |
| C6_04100W_A | 21.19501 | 1.6E-13  | 3647836  |
| C5_05020C_A | 21.05027 | 2.25E-09 | 3636486  |
| C1_07260C_A | 20.82136 | 0.000788 | 3644456  |
| SMC1        | 20.77328 | 8.12E-06 | 3643221  |
| TAL1        | 20.74321 | 8.48E-30 | 3643225  |
| C2_09050C_A | 20.44842 | 2.59E-09 | 3645791  |
| ERG24       | 20.3643  | 4.16E-10 | 3647716  |
| KTR4        | 20.30932 | 0.001177 | 3646425  |
| ERP5        | 20.29853 | 2.77E-09 | 30515046 |
| SUN41       | 20.1149  | 1.93E-36 | 3647067  |
| C2_07010W_A | 20.1088  | 7.38E-12 | 3643535  |
| CSR1        | 19.84429 | 2.61E-07 | 3641162  |
| C2_09100C_A | 19.71139 | 3.78E-10 | 3644113  |
| C1_04430C_A | 19.67792 | 0.000902 | 30514986 |
| C1_12650C_A | 19.65176 | 0.000934 | 3646836  |
| ASH2        | 19.48964 | 0.000919 | 3636445  |
| LSP1        | 19.31179 | 3.67E-33 | 3648025  |

|             |          |          |          |
|-------------|----------|----------|----------|
| C2_07540W_A | 19.24195 | 0.000943 | 3645222  |
| GIN4        | 18.95061 | 7.94E-10 | 3644543  |
| SWI6        | 18.91173 | 0.00103  | 3634932  |
| C2_07140W_A | 18.71057 | 4.49E-11 | 3643508  |
| TSA1        | 18.68621 | 6.67E-24 | 3642269  |
| POL1        | 18.54254 | 2.89E-09 | 3635144  |
| MSH6        | 18.35239 | 2.95E-09 | 3636161  |
| PHO15       | 18.24272 | 1.47E-09 | 3644459  |
| C5_03120W_A | 18.21076 | 0.001255 | 3637705  |
| C1_01210W_A | 18.10377 | 1.83E-08 | 3640209  |
| CR_01490C_A | 18.07979 | 6.03E-07 | 30515376 |
| DOA1        | 18.05185 | 2.3E-13  | 3634871  |
| CDC21       | 17.98319 | 0.001293 | 3643463  |
| GND1        | 17.83615 | 2E-27    | 3636131  |
| HGT2        | 17.81097 | 2.44E-27 | 3644579  |
| LAP41       | 17.60739 | 1.77E-12 | 3636653  |
| C3_02820C_A | 17.55181 | 9.24E-13 | 3638419  |
| MPS1        | 17.53413 | 0.001536 | 3641888  |
| HOF1        | 17.4892  | 1.71E-06 | 3645014  |
| RFC5        | 17.37944 | 0.001533 | 3638890  |
| C3_06400C_A | 17.3375  | 2.86E-05 | 3642260  |
| C5_01070C_A | 17.30014 | 5.18E-12 | 3642627  |
| SCW11       | 17.25478 | 5E-13    | 3636521  |
| DAP1        | 17.24126 | 1.34E-06 | 3641021  |
| CR_09520C_A | 17.21157 | 3.02E-05 | 3647103  |
| HSL1        | 17.11037 | 4.98E-12 | 3637810  |
| NHP6A       | 17.10157 | 1.67E-14 | 30515244 |
| MCM2        | 17.07316 | 0.00165  | 3643197  |
| CR_03520C_A | 17.05097 | 9.41E-11 | 3643203  |
| ACT1        | 17.04361 | 4.37E-36 | 3636195  |
| CMP1        | 16.95596 | 1.29E-09 | 3639328  |
| GPX2        | 16.88944 | 4.01E-23 | 3644009  |
| RGD1        | 16.88671 | 1.31E-06 | 3639868  |
| SAR1        | 16.80886 | 2.37E-11 | 3645865  |
| CR_05130C_A | 16.76696 | 0.001902 | 3646401  |
| VMA2        | 16.76168 | 8.14E-18 | 3646710  |
| TSA1B       | 16.64203 | 1.87E-21 | 30515214 |
| CR_08450C_A | 16.61399 | 3.12E-09 | 3642133  |
| EAF6        | 16.58533 | 0.002062 | 3646494  |
| ACS2        | 16.52656 | 1.5E-29  | 3644710  |
| C4_05250W_A | 16.48865 | 2.96E-06 | 3646158  |
| CR_05800C_A | 16.47041 | 0.001945 | 3646706  |
| QCR8        | 16.46343 | 2.21E-10 | 30515112 |
| ATP3        | 16.41498 | 1.14E-16 | 3640387  |
| RNR1        | 16.33511 | 1.33E-16 | 3642989  |
| C4_00390W_A | 16.30467 | 5.13E-05 | 3645016  |
| ERG9        | 16.30331 | 2.89E-15 | 3643913  |

|             |          |          |          |
|-------------|----------|----------|----------|
| NUO1        | 16.28398 | 2.83E-10 | 3647100  |
| C1_06920C_A | 16.24189 | 0.002128 | 3639525  |
| SEP7        | 16.18678 | 7.27E-08 | 3644596  |
| C1_02500W_A | 16.172   | 0.002288 | 3636795  |
| LAT1        | 16.16685 | 1.51E-21 | 3636986  |
| CR_04770C_A | 16.0222  | 0.002241 | 3647302  |
| C6_02880W_A | 15.98532 | 0.002273 | 3639238  |
| C4_07080C_A | 15.97987 | 5.46E-05 | 3642905  |
| C2_00590W_A | 15.94515 | 5.42E-05 | 3638851  |
| DPM3        | 15.90962 | 6.03E-05 | 30515245 |
| C2_10200W_A | 15.88837 | 0.002278 | 3643928  |
| HMG1        | 15.87954 | 7.76E-13 | 3644687  |
| C2_05290C_A | 15.87477 | 3.65E-06 | 3643472  |
| SEF2        | 15.79999 | 6.9E-05  | 3647052  |
| CR_08610W_A | 15.76689 | 1.93E-09 | 3642109  |
| C7_00230W_A | 15.75493 | 9.13E-08 | 3637982  |
| CLB4        | 15.73573 | 7.41E-05 | 3643102  |
| C2_03020C_A | 15.71582 | 3.77E-16 | 3643019  |
| SEC13       | 15.71438 | 1.28E-11 | 3638425  |
| CR_03330W_A | 15.6741  | 0.002425 | 3645095  |
| RET2        | 15.63177 | 6.85E-11 | 3637714  |
| C1_04200C_A | 15.56799 | 2.25E-06 | 3644718  |
| C1_01080W_A | 15.55701 | 0.002491 | 3640173  |
| SAC1        | 15.54995 | 1.14E-07 | 3634864  |
| HAT1        | 15.54863 | 5.7E-05  | 3644770  |
| C1_03240W_A | 15.35684 | 2.34E-06 | 3636895  |
| FAS2        | 15.31214 | 4.22E-36 | 3635222  |
| ZWF1        | 15.25998 | 1.48E-16 | 3634913  |
| PLC2        | 15.23847 | 2.19E-06 | 3642985  |
| CR_03270W_A | 15.07747 | 2.25E-06 | 3645101  |
| TVP18       | 15.02328 | 2.83E-06 | 3634844  |
| CR_10530W_A | 14.96465 | 0.002774 | 3639042  |
| HTA3        | 14.91615 | 6.08E-07 | 3638322  |
| MSC7        | 14.88001 | 8.65E-14 | 3645214  |
| SRB1        | 14.8783  | 1.55E-23 | 3647454  |
| PMT4        | 14.73193 | 3.05E-13 | 3644096  |
| C2_06610C_A | 14.605   | 0.00349  | 30515140 |
| C7_00670C_A | 14.59621 | 1.47E-08 | 3638024  |
| PGA63       | 14.5946  | 4.82E-16 | 3639524  |
| CR_05360C_A | 14.5677  | 0.003282 | 3648033  |
| C5_04950C_A | 14.55577 | 1.89E-08 | 3636422  |
| ACB1        | 14.52    | 1.09E-08 | 30515350 |
| PDX1        | 14.47718 | 3.16E-16 | 3636128  |
| C1_01190C_A | 14.4517  | 0.000128 | 3640207  |
| C1_09980C_A | 14.44185 | 0.000101 | 3634863  |
| C3_05990C_A | 14.43267 | 2.49E-07 | 3641732  |
| C7_01710W_A | 14.34976 | 6.49E-11 | 3637012  |

|             |          |          |          |
|-------------|----------|----------|----------|
| NGT1        | 14.28793 | 0.0034   | 3640573  |
| VCX1        | 14.02691 | 2.27E-10 | 3646508  |
| C6_03130W_A | 14.01954 | 6.33E-06 | 30515341 |
| SEC12       | 14.01209 | 4.54E-11 | 3641639  |
| CBP1        | 13.99711 | 1.44E-15 | 3641920  |
| C4_04980W_A | 13.99494 | 5.03E-06 | 3641167  |
| C1_00700W_A | 13.98533 | 0.003938 | 3639330  |
| SPE3        | 13.97826 | 4.11E-10 | 3643528  |
| ERG5        | 13.95357 | 9.53E-22 | 3641400  |
| C4_02930W_A | 13.9269  | 0.000123 | 3637876  |
| C5_02220C_A | 13.92059 | 0.003948 | 3637760  |
| HET1        | 13.87745 | 1.07E-12 | 3647897  |
| ATP2        | 13.82176 | 1.76E-33 | 3645039  |
| CUP5        | 13.75874 | 1.73E-13 | 3635174  |
| C2_06770W_A | 13.6893  | 0.003869 | 3643515  |
| PDB1        | 13.59833 | 1.11E-21 | 3641186  |
| CR_09070C_A | 13.57104 | 4.68E-13 | 3641926  |
| MIS11       | 13.5305  | 1.06E-15 | 3645732  |
| CR_09230C_A | 13.52248 | 6.99E-06 | 3641918  |
| SUC1        | 13.41094 | 1.51E-11 | 3641916  |
| LAG1        | 13.31954 | 7.52E-08 | 3640383  |
| LYS1        | 13.30931 | 2.71E-10 | 6335429  |
| C2_03970W_A | 13.26784 | 0.004315 | 3637419  |
| CDC19       | 13.21427 | 3.33E-32 | 3643438  |
| C1_10310W_A | 13.15095 | 0.004357 | 3634906  |
| CR_03470W_A | 13.14537 | 0.004273 | 3643198  |
| CR_03000C_A | 13.14537 | 0.004306 | 3642597  |
| KIP1        | 13.10285 | 0.000199 | 3645261  |
| SOU1        | 13.02748 | 0.000217 | 3642799  |
| C3_01070C_A | 13.01474 | 0.004432 | 3639832  |
| C6_03320W_A | 13.00113 | 1.04E-05 | 3639198  |
| COF1        | 12.99901 | 2.58E-12 | 30515293 |
| CDC5        | 12.98358 | 1.56E-11 | 3639281  |
| C1_03170C_A | 12.91725 | 0.004574 | 3636805  |
| C5_00080C_A | 12.8058  | 1.21E-10 | 3647886  |
| OPI3        | 12.79772 | 0.00467  | 3642277  |
| C6_02200C_A | 12.78229 | 0.00471  | 3645863  |
| LYS9        | 12.71841 | 6.87E-08 | 3642279  |
| C4_04800W_A | 12.59042 | 3.67E-15 | 3641113  |
| C5_04410C_A | 12.53255 | 1.08E-05 | 3636410  |
| SFH5        | 12.48035 | 6.17E-10 | 3634884  |
| C4_06140C_A | 12.45019 | 0.004981 | 3642821  |
| CR_09570W_A | 12.41977 | 1.2E-05  | 3647098  |
| C1_01290C_A | 12.30547 | 0.00034  | 3640184  |
| SSH1        | 12.29968 | 1.98E-08 | 3642504  |
| GVP36       | 12.29794 | 7.59E-08 | 3641772  |
| RKI1        | 12.2262  | 0.000366 | 3636574  |

|             |          |          |          |
|-------------|----------|----------|----------|
| PIL1        | 12.22007 | 7.32E-28 | 3644769  |
| PDR17       | 12.21893 | 0.000367 | 3643007  |
| C6_02330W_A | 12.19171 | 3.4E-29  | 3645877  |
| CR_04860C_A | 12.10616 | 0.005429 | 3647294  |
| MCM6        | 12.10593 | 1.94E-05 | 3640142  |
| IQG1        | 12.03896 | 1.13E-14 | 3637052  |
| HXK2        | 12.0263  | 5.93E-34 | 3641015  |
| C5_02210W_A | 12.02373 | 1.8E-07  | 3637759  |
| C5_01440C_A | 12.01277 | 1.7E-06  | 3647043  |
| C4_04860W_A | 11.98991 | 1.42E-06 | 3641161  |
| IPP1        | 11.9393  | 4.03E-20 | 3643874  |
| C4_02420C_A | 11.89128 | 0.006572 | 3637849  |
| PST1        | 11.86926 | 1.65E-15 | 3643520  |
| RPS17B      | 11.85149 | 2.48E-12 | 30515044 |
| C1_07590C_A | 11.81814 | 1.62E-06 | 3646673  |
| C4_04600C_A | 11.75994 | 0.000429 | 3641156  |
| BTA1        | 11.75316 | 0.001649 | 3645347  |
| CHS2        | 11.73448 | 1.68E-14 | 3641893  |
| MNT1        | 11.71919 | 3.37E-20 | 3636585  |
| RPL24A      | 11.68435 | 8.46E-13 | 3641174  |
| C1_09020W_A | 11.68125 | 2.68E-07 | 3634917  |
| RFA1        | 11.58452 | 1.15E-10 | 3638823  |
| C1_04780C_A | 11.57231 | 1.53E-06 | 3644774  |
| C3_07230W_A | 11.57136 | 8.66E-11 | 3638531  |
| CYP1        | 11.54777 | 6.32E-15 | 3636978  |
| C1_14320C_A | 11.52729 | 0.006399 | 3643316  |
| MYO2        | 11.52467 | 1.25E-12 | 3636140  |
| C2_02410W_A | 11.43123 | 1.53E-09 | 3635755  |
| ABG1        | 11.42344 | 5.64E-08 | 3647715  |
| CR_08480C_A | 11.38185 | 4.96E-07 | 30515442 |
| MYO1        | 11.38105 | 1.06E-10 | 3647248  |
| VMA5        | 11.32406 | 7.05E-10 | 3642316  |
| GDE1        | 11.29875 | 9.15E-13 | 3636505  |
| SER33       | 11.28739 | 3.15E-16 | 3642030  |
| ARP3        | 11.21969 | 7.62E-12 | 3643479  |
| ILV5        | 11.19789 | 4.9E-13  | 3644012  |
| ARC35       | 11.15945 | 5.23E-08 | 3639823  |
| QCR7        | 11.13618 | 8.34E-10 | 3639233  |
| ERG251      | 11.05691 | 1.89E-24 | 3635716  |
| C4_00020W_A | 11.04896 | 3.21E-11 | 3648053  |
| NDE1        | 11.02745 | 4.78E-27 | 3638354  |
| CWH41       | 10.98264 | 4.41E-07 | 3646533  |
| FTR2        | 10.97902 | 3.43E-10 | 3643303  |
| C1_03720C_A | 10.96743 | 2.87E-10 | 3648216  |
| SPC3        | 10.95808 | 3.56E-06 | 3636121  |
| ERG4        | 10.94191 | 4.02E-15 | 3640511  |
| C1_11960C_A | 10.93384 | 0.00809  | 30515060 |

|             |          |          |          |
|-------------|----------|----------|----------|
| SMC2        | 10.91691 | 4.06E-06 | 3643918  |
| C2_09040W_A | 10.88432 | 7.1E-07  | 3645792  |
| TRX1        | 10.85121 | 1.29E-11 | 3638950  |
| MDH1-1      | 10.84761 | 1.32E-15 | 3635636  |
| C7_04000W_A | 10.84761 | 6.71E-07 | 3643114  |
| RHO1        | 10.84749 | 9.43E-16 | 3642564  |
| CLC1        | 10.82782 | 1.31E-10 | 3635662  |
| SEC20       | 10.80002 | 0.00057  | 3639206  |
| MRP8        | 10.79127 | 1.33E-06 | 3641178  |
| C5_01590W_A | 10.76968 | 5.02E-06 | 3647041  |
| C2_07550W_A | 10.727   | 9.09E-10 | 3645221  |
| APL4        | 10.70318 | 9.96E-10 | 3642565  |
| EXO1        | 10.68534 | 4.78E-05 | 3641583  |
| CR_10440W_A | 10.59183 | 0.00899  | 3638976  |
| GLC3        | 10.58265 | 7.13E-15 | 3639200  |
| VMA11       | 10.5496  | 5.53E-06 | 3637054  |
| YVC1        | 10.54932 | 8.19E-15 | 3642303  |
| MNN12       | 10.5447  | 6.06E-15 | 3634904  |
| C3_04420W_A | 10.54163 | 3.4E-15  | 3635180  |
| ADH2        | 10.465   | 5.56E-20 | 3640751  |
| C6_03950C_A | 10.44435 | 5.35E-06 | 3640268  |
| IDH1        | 10.44366 | 9.08E-19 | 3634893  |
| C2_07720C_A | 10.38529 | 2.57E-14 | 3642304  |
| CR_09590W_A | 10.36537 | 2.35E-08 | 3647095  |
| RAS1        | 10.35081 | 1.35E-20 | 3643927  |
| C1_05180C_A | 10.30981 | 0.010304 | 30514990 |
| TRS20       | 10.28241 | 0.000787 | 3640214  |
| C6_00770C_A | 10.25555 | 0.00983  | 3647079  |
| MEU1        | 10.25331 | 9.67E-08 | 3645635  |
| C1_01800W_A | 10.21706 | 0.00084  | 3645407  |
| DPB4        | 10.18944 | 8.44E-05 | 3638818  |
| ALD5        | 10.16838 | 2.25E-25 | 3643026  |
| AXL2        | 10.15946 | 2.06E-11 | 3641184  |
| C7_01500W_A | 10.15372 | 7.95E-05 | 3637050  |
| TPM2        | 10.14063 | 1.1E-18  | 30515441 |
| CDC46       | 10.08845 | 9.16E-05 | 3646912  |
| CR_07220C_A | 10.06463 | 5.22E-10 | 3646040  |
| C4_04970C_A | 10.03118 | 8.07E-05 | 30515274 |
| CR_04760C_A | 10.02604 | 0.000929 | 3647303  |
| C4_01510W_A | 10.01549 | 1.61E-06 | 3635616  |
| C1_06270W_A | 10.01397 | 1.39E-06 | 3647523  |
| MET6        | 10.01045 | 4.98E-20 | 3640084  |
| DUT1        | 10.00712 | 8.47E-05 | 3640188  |
| CDC3        | 9.987704 | 4.26E-16 | 3644719  |
| PDA1        | 9.982906 | 6.29E-25 | 3642902  |
| OPT6        | 9.97926  | 1.35E-09 | 3635603  |
| C6_03090W_A | 9.946713 | 0.010899 | 3639275  |

|             |          |          |          |
|-------------|----------|----------|----------|
| CEK1        | 9.941207 | 8.86E-05 | 3642789  |
| C6_01460C_A | 9.941129 | 2.05E-06 | 3641623  |
| KGD2        | 9.919755 | 6.17E-15 | 3646036  |
| RHO2        | 9.902147 | 7.68E-06 | 30515143 |
| CDC42       | 9.879379 | 4.88E-08 | 3646488  |
| C6_03960W_A | 9.859484 | 1.62E-13 | 3640269  |
| C6_02480W_A | 9.792949 | 8.87E-05 | 3639170  |
| DUN1        | 9.790309 | 9.24E-05 | 3636494  |
| CR_07120C_A | 9.777447 | 0.000136 | 3648225  |
| CR_05760C_A | 9.705363 | 0.001063 | 3646695  |
| C3_05880C_A | 9.70211  | 3.49E-12 | 3641737  |
| CR_06070W_A | 9.650586 | 3.09E-09 | 3644840  |
| ATP17       | 9.595299 | 4.52E-12 | 30515364 |
| C6_03050C_A | 9.58327  | 0.001212 | 3639270  |
| CR_03950W_A | 9.579202 | 0.01233  | 3640960  |
| PRN4        | 9.53016  | 1.33E-05 | 3639877  |
| C5_04550W_A | 9.528747 | 0.000133 | 3636508  |
| POR1        | 9.509977 | 2.65E-24 | 3644698  |
| FUM11       | 9.456687 | 3.75E-12 | 3641016  |
| C3_00520W_A | 9.452368 | 0.001342 | 3640513  |
| SCP1        | 9.446528 | 0.012955 | 3646554  |
| CR_07110C_A | 9.432651 | 0.002017 | 3648224  |
| C4_03290W_A | 9.428173 | 2.14E-09 | 3637887  |
| PHO89       | 9.39985  | 2.42E-10 | 3635633  |
| IST2        | 9.382877 | 1.46E-14 | 3646662  |
| BFR1        | 9.379688 | 1.11E-14 | 3635579  |
| STT3        | 9.369388 | 8.3E-11  | 3635743  |
| CR_05200C_A | 9.35318  | 1.4E-05  | 3648080  |
| SNG3        | 9.324976 | 1.26E-08 | 3646715  |
| ACO1        | 9.31453  | 5.37E-21 | 3642090  |
| MTS1        | 9.313708 | 4.87E-12 | 3634873  |
| ASE1        | 9.311285 | 0.000138 | 3641729  |
| INP51       | 9.29907  | 1.39E-05 | 3643806  |
| C3_05290C_A | 9.253093 | 0.001786 | 3635203  |
| CPH1        | 9.248806 | 2.08E-06 | 3644468  |
| C7_03350C_A | 9.218156 | 0.013924 | 3646722  |
| SEC18       | 9.214114 | 7.64E-11 | 3636208  |
| CR_01280C_A | 9.195649 | 1.86E-05 | 3640400  |
| APL2        | 9.182041 | 2.02E-08 | 3638343  |
| CAR1        | 9.14783  | 3.36E-12 | 3636503  |
| ADE1        | 9.130677 | 5E-10    | 3639722  |
| C2_09760W_A | 9.122612 | 0.000189 | 3643807  |
| C2_07390C_A | 9.1038   | 6.89E-11 | 3645229  |
| EGD2        | 9.091137 | 1.98E-13 | 3635284  |
| HTB1        | 9.059746 | 4.32E-15 | 3645659  |
| TPD3        | 9.039165 | 5.12E-11 | 3638512  |
| SUB2        | 9.015351 | 5.52E-15 | 3645033  |



|             |          |          |          |
|-------------|----------|----------|----------|
| KIP2        | 8.960555 | 2.31E-05 | 3643954  |
| C1_05950C_A | 8.945637 | 4.3E-10  | 3639859  |
| PMT1        | 8.941529 | 6.22E-14 | 3641393  |
| MNS1        | 8.927177 | 6.79E-08 | 3644692  |
| ADE6        | 8.898062 | 1.52E-14 | 3647304  |
| HIS1        | 8.892705 | 1.14E-06 | 3636501  |
| VMA8        | 8.885336 | 5E-08    | 3642798  |
| ACC1        | 8.883258 | 1.52E-25 | 3639688  |
| EGD1        | 8.880135 | 2.05E-11 | 3645340  |
| CEX1        | 8.87234  | 0.000265 | 3644913  |
| C1_06630W_A | 8.814627 | 4.74E-05 | 3639544  |
| GIN1        | 8.814083 | 3.24E-05 | 3644539  |
| TRP4        | 8.76954  | 0.002422 | 3642904  |
| SPC34       | 8.741347 | 0.018656 | 3641173  |
| BUB1        | 8.740225 | 1E-07    | 3637922  |
| C6_04280W_A | 8.723266 | 2.05E-09 | 3646279  |
| C2_02020W_A | 8.696522 | 2.39E-09 | 3635769  |
| BMH1        | 8.658374 | 1.77E-19 | 3636810  |
| ATP5        | 8.645678 | 9.73E-15 | 3640521  |
| ALG8        | 8.631882 | 0.002588 | 3636562  |
| RPP2A       | 8.622932 | 1.83E-10 | 30515439 |
| DPP2        | 8.60441  | 0.002425 | 3645341  |
| C4_04440W_A | 8.58362  | 3.08E-09 | 3641177  |
| LHS1        | 8.548649 | 1.58E-10 | 3643032  |
| CYK3        | 8.511661 | 0.000414 | 3639539  |
| SDH12       | 8.495604 | 3.67E-13 | 3642775  |
| CAS1        | 8.476569 | 0.000375 | 3645324  |
| C7_00190W_A | 8.436592 | 1.57E-07 | 3637969  |
| VPS1        | 8.382092 | 1.95E-13 | 3642656  |
| RIC1        | 8.350939 | 0.000421 | 3639331  |
| C2_06920C_A | 8.288313 | 1.69E-05 | 3643524  |
| RHO3        | 8.283873 | 2.68E-07 | 3643448  |
| CAM1-1      | 8.278231 | 5.52E-10 | 3646358  |
| C5_00340W_A | 8.263425 | 2.12E-05 | 3641555  |
| FRS2        | 8.228056 | 3.04E-11 | 3636824  |
| VMA7        | 8.210034 | 0.000592 | 3637332  |
| MCR1        | 8.172543 | 1.3E-14  | 3647561  |
| RPS15       | 8.147919 | 9.15E-13 | 3635194  |
| PRD1        | 8.137728 | 4.02E-12 | 3642471  |
| CR_00130C_A | 8.1292   | 3.98E-07 | 3639709  |
| ADK1        | 8.060314 | 4.22E-10 | 3644533  |
| STV1        | 8.051537 | 3.45E-12 | 3646070  |
| AAT1        | 8.032563 | 6.98E-13 | 3643468  |
| NRM1        | 8.012891 | 0.003337 | 3639343  |
| VAM3        | 8.005399 | 0.000439 | 3635146  |
| SPC2        | 7.995808 | 0.003164 | 3645769  |
| MET15       | 7.977717 | 4.24E-11 | 3645031  |

|             |          |          |          |
|-------------|----------|----------|----------|
| C2_02310W_A | 7.970895 | 9.13E-07 | 3635809  |
| C3_01940C_A | 7.964975 | 1.95E-07 | 3636600  |
| C1_09670C_A | 7.953908 | 0.022494 | 3634872  |
| CR_04850C_A | 7.953374 | 0.022442 | 3647295  |
| SKN1        | 7.946307 | 8.22E-13 | 3641755  |
| C1_12180C_A | 7.942181 | 0.000519 | 3642038  |
| KAR2        | 7.896332 | 2.51E-17 | 3638830  |
| AYR1        | 7.889951 | 9.37E-06 | 3647754  |
| IDP2        | 7.889912 | 1.14E-10 | 3644934  |
| CAP4        | 7.882325 | 0.003536 | 3637335  |
| RIP1        | 7.865597 | 1.65E-11 | 3635204  |
| CR_00880W_A | 7.86341  | 0.003399 | 3640397  |
| C1_10510W_A | 7.842454 | 0.023028 | 3647189  |
| C5_05040W_A | 7.818676 | 9.22E-05 | 3636488  |
| AAP1        | 7.812421 | 0.000516 | 3647397  |
| C4_06460C_A | 7.796443 | 0.003451 | 3642791  |
| PHO113      | 7.781413 | 0.02444  | 3644946  |
| ESP1        | 7.767328 | 1.53E-05 | 3640197  |
| C7_03780C_A | 7.75079  | 0.00379  | 3643119  |
| CR_02210W_A | 7.718089 | 2.22E-13 | 3644943  |
| C1_02700C_A | 7.708059 | 6.75E-10 | 30514972 |
| C4_03400W_A | 7.686008 | 0.004214 | 30515256 |
| SDH2        | 7.685686 | 2.39E-09 | 3646397  |
| PUP2        | 7.67011  | 1.05E-09 | 3646617  |
| C4_00910C_A | 7.665241 | 0.000616 | 3635679  |
| C7_00410C_A | 7.654614 | 1.52E-07 | 3638033  |
| VRG4        | 7.633069 | 5.47E-08 | 3641768  |
| RTT109      | 7.615836 | 0.025479 | 3639678  |
| C4_03770W_A | 7.603655 | 0.003762 | 3645354  |
| GWT1        | 7.59385  | 1.76E-06 | 3645575  |
| C2_02260W_A | 7.583973 | 2.89E-06 | 3635778  |
| C3_06410C_A | 7.577567 | 0.000766 | 3642261  |
| IRO1        | 7.569452 | 1.27E-12 | 3636648  |
| RAD53       | 7.481906 | 0.003998 | 3645633  |
| C1_08730W_A | 7.478854 | 0.000646 | 3634938  |
| CR_10140W_A | 7.415088 | 1.67E-12 | 3638972  |
| C2_01260W_A | 7.410701 | 0.004161 | 3638792  |
| CR_06510W_A | 7.385056 | 0.000689 | 3645264  |
| C6_00110C_A | 7.383024 | 2.2E-05  | 3647896  |
| C4_05080C_A | 7.381074 | 2.16E-05 | 3641129  |
| C7_02520W_A | 7.374264 | 0.029796 | 3636941  |
| C6_01360W_A | 7.367841 | 0.000317 | 3641608  |
| ATP4        | 7.365607 | 8.51E-13 | 3643418  |
| HGC1        | 7.347499 | 6.18E-09 | 3639349  |
| RAD52       | 7.333958 | 0.000137 | 3647148  |
| C1_13270W_A | 7.331266 | 2.98E-05 | 3636144  |
| NUC2        | 7.303643 | 1.05E-09 | 3637030  |

|             |          |          |          |
|-------------|----------|----------|----------|
| SNF5        | 7.289486 | 5.68E-06 | 3648297  |
| ARE2        | 7.285744 | 9.86E-09 | 3643526  |
| C6_00930C_A | 7.250979 | 6.78E-07 | 3644032  |
| ALG6        | 7.244575 | 3.62E-05 | 3647316  |
| TEF2        | 7.232087 | 9.92E-21 | 3646502  |
| C2_09780C_A | 7.222129 | 1.52E-07 | 3643805  |
| RPL43A      | 7.211315 | 1.77E-11 | 30515319 |
| CAT2        | 7.209105 | 2.64E-10 | 3635659  |
| C6_02560W_A | 7.20346  | 1.12E-05 | 3639205  |
| CLB2        | 7.198186 | 7.29E-10 | 3635840  |
| ABP2        | 7.196143 | 0.000806 | 3643443  |
| SAP4        | 7.188097 | 0.031069 | 3640257  |
| PEX8        | 7.183862 | 0.000187 | 3647393  |
| SUR7        | 7.179139 | 1.33E-16 | 3641610  |
| HIS5        | 7.178124 | 0.004982 | 3645756  |
| DED81       | 7.148543 | 4.15E-12 | 3646227  |
| CHL4        | 7.148132 | 0.030211 | 3646131  |
| DBF2        | 7.147523 | 2.15E-07 | 3648101  |
| C1_10540C_A | 7.103274 | 0.000252 | 3647193  |
| ATP14       | 7.094073 | 1.92E-09 | 30515134 |
| C3_04780C_A | 7.09259  | 6.63E-07 | 3635214  |
| STE23       | 7.087355 | 4.68E-10 | 3639236  |
| C4_01460C_A | 7.067962 | 0.005598 | 3635622  |
| C1_08080C_A | 7.053401 | 1.04E-06 | 30515029 |
| C7_01320W_A | 7.041652 | 2.11E-07 | 3645896  |
| C4_06160W_A | 7.025781 | 0.004944 | 3642819  |
| PCK1        | 7.022082 | 1.32E-12 | 3639701  |
| CHS8        | 7.009776 | 5.71E-13 | 3640532  |
| C6_02530C_A | 6.98175  | 0.001239 | 3639175  |
| AGE3        | 6.968304 | 3.01E-07 | 3644565  |
| SMC3        | 6.957844 | 0.005142 | 3638408  |
| C1_10520W_A | 6.943515 | 0.03425  | 3647191  |
| PST2        | 6.925735 | 0.001146 | 3643909  |
| FRP3        | 6.920559 | 1.37E-14 | 3648102  |
| YPT72       | 6.920542 | 1.71E-06 | 3643523  |
| GLO3        | 6.91389  | 1.92E-13 | 3640556  |
| SSO2        | 6.89545  | 6.04E-11 | 3643809  |
| C1_14180W_A | 6.88485  | 8.16E-08 | 3643324  |
| TFC4        | 6.883027 | 4.15E-09 | 3638420  |
| C5_03950W_A | 6.883011 | 4.61E-05 | 3647445  |
| C5_00060C_A | 6.882171 | 5.27E-05 | 3647889  |
| CR_09050C_A | 6.879047 | 0.001157 | 3648197  |
| C3_01590W_A | 6.831143 | 0.000332 | 3636666  |
| CMK2        | 6.82404  | 1.54E-09 | 3643961  |
| SMF3        | 6.819669 | 5.01E-08 | 3638852  |
| C4_05790W_A | 6.818539 | 1.09E-05 | 3641784  |
| C1_10750C_A | 6.818205 | 0.00553  | 30515043 |

|             |          |          |          |
|-------------|----------|----------|----------|
| C1_08140W_A | 6.816755 | 0.005589 | 3640730  |
| C4_03860C_A | 6.800757 | 0.006248 | 3647854  |
| C1_00420W_A | 6.781184 | 5.18E-08 | 3639286  |
| FAS1        | 6.769636 | 2.24E-20 | 3641593  |
| C5_05350W_A | 6.769237 | 0.0004   | 3636401  |
| CSM3        | 6.756903 | 0.03727  | 3644083  |
| CAM1        | 6.749842 | 2.16E-15 | 3641734  |
| STE24       | 6.736175 | 4.16E-11 | 3645040  |
| CR_05680C_A | 6.735029 | 0.000393 | 3646684  |
| C3_02570W_A | 6.731907 | 7.6E-07  | 3638375  |
| C3_05280C_A | 6.719871 | 0.000381 | 3635202  |
| C3_00850C_A | 6.715121 | 4.87E-14 | 3647748  |
| C1_02330C_A | 6.710716 | 4.66E-07 | 30514969 |
| TOS4        | 6.693881 | 3.03E-09 | 3644548  |
| SMP3        | 6.689076 | 0.038235 | 3642980  |
| C2_02670C_A | 6.687622 | 0.038387 | 3643008  |
| C5_01960C_A | 6.687296 | 7.72E-08 | 3643738  |
| CR_01320C_A | 6.668859 | 1.34E-05 | 3640386  |
| RPS12       | 6.666639 | 7.72E-10 | 3638438  |
| C1_07510W_A | 6.652265 | 0.006532 | 3646664  |
| APM4        | 6.648104 | 0.001419 | 3642297  |
| C7_01460C_A | 6.626322 | 0.001924 | 3636958  |
| CR_07460C_A | 6.618287 | 1.85E-07 | 3646049  |
| RSR1        | 6.586073 | 1.1E-10  | 3640145  |
| C3_00170C_A | 6.575777 | 1.39E-06 | 3640589  |
| C1_11760C_A | 6.545806 | 0.000499 | 3645328  |
| ADO1        | 6.542896 | 8E-10    | 3639274  |
| C3_01610W_A | 6.525595 | 4.95E-10 | 3636664  |
| C1_05490C_A | 6.523794 | 3.63E-06 | 3642507  |
| RPL8B       | 6.522765 | 4.05E-10 | 3635198  |
| C5_04260W_A | 6.518286 | 0.00216  | 3636451  |
| AHP2        | 6.509268 | 4.42E-06 | 3636977  |
| KGD1        | 6.496019 | 7.97E-12 | 3647752  |
| C1_03490W_A | 6.494101 | 9.61E-07 | 3636914  |
| RAP1        | 6.483809 | 6.93E-06 | 3643945  |
| VMA13       | 6.481918 | 2.23E-09 | 30515402 |
| ASN1        | 6.48163  | 1.05E-10 | 3645790  |
| YBL053      | 6.470296 | 9.32E-05 | 3647045  |
| CRD2        | 6.465838 | 0.040993 | 30515234 |
| GAL4        | 6.457726 | 1.05E-12 | 3641244  |
| NUF2        | 6.455082 | 0.000677 | 3642613  |
| RDI1        | 6.451771 | 2.51E-11 | 3635167  |
| CPY1        | 6.44833  | 3.49E-12 | 3646721  |
| C1_05670W_A | 6.4425   | 2.77E-09 | 3639899  |
| C7_03160W_A | 6.437378 | 8.79E-10 | 3641345  |
| C5_05230C_A | 6.419824 | 2.7E-11  | 3636470  |
| GIT2        | 6.413379 | 1.83E-08 | 3642633  |

|             |          |          |         |
|-------------|----------|----------|---------|
| PHO114      | 6.410801 | 0.043618 | 3635644 |
| C2_06890C_A | 6.404977 | 0.007775 | 3643522 |
| MDH1        | 6.396861 | 4.7E-11  | 3639667 |
| C5_01260W_A | 6.385111 | 0.043877 | 3642615 |
| C2_08930W_A | 6.370181 | 5.35E-08 | 3645795 |
| INT1        | 6.340257 | 2.74E-12 | 3637761 |
| CR_00060C_A | 6.330469 | 3.36E-09 | 3639673 |
| INO1        | 6.325914 | 8.8E-20  | 3638966 |
| THI13       | 6.303743 | 0.007798 | 3641921 |
| C2_09970C_A | 6.287768 | 2.63E-09 | 3643820 |
| SEC8        | 6.286974 | 1.85E-06 | 3647078 |
| C1_01950C_A | 6.279151 | 0.00273  | 3645421 |
| PFY1        | 6.276943 | 6.92E-10 | 3640703 |
| C7_03310W_A | 6.274967 | 0.008463 | 3646726 |
| KAR9        | 6.264609 | 0.000124 | 3636136 |
| LMO1        | 6.258409 | 6.12E-09 | 3641403 |
| C4_00770C_A | 6.256192 | 9.7E-06  | 3645760 |
| NDH51       | 6.250215 | 4.6E-10  | 3645444 |
| UGA32       | 6.244484 | 0.002567 | 3639333 |
| TOM20       | 6.240747 | 7.39E-06 | 3636817 |
| C1_00830W_A | 6.239427 | 0.000674 | 3639344 |
| ORC3        | 6.227485 | 2.29E-06 | 3645639 |
| C1_05320C_A | 6.227263 | 0.000152 | 3642470 |
| C3_02290W_A | 6.224708 | 3.46E-07 | 3636556 |
| VPS51       | 6.185246 | 0.002681 | 3639242 |
| CDC20       | 6.180834 | 5.1E-06  | 3644057 |
| C4_00190W_A | 6.175423 | 0.008845 | 3645030 |
| C1_11280W_A | 6.171893 | 7.95E-06 | 3644554 |
| FMO2        | 6.164036 | 0.009186 | 3637440 |
| TMA19       | 6.160149 | 2.09E-12 | 3640399 |
| IHD2        | 6.151718 | 1.31E-05 | 3639359 |
| CR_00690C_A | 6.139352 | 0.000138 | 3640390 |
| C1_00210C_A | 6.136751 | 6.31E-10 | 3639335 |
| IFA21       | 6.13143  | 0.000591 | 3641344 |
| FCY2        | 6.129315 | 1.43E-05 | 3638365 |
| CDC54       | 6.105857 | 0.002932 | 3647606 |
| C2_10470C_A | 6.09665  | 1.33E-06 | 3641196 |
| KSR1        | 6.090427 | 0.000633 | 3646052 |
| PHM7        | 6.080002 | 1.44E-14 | 3642329 |
| HOC1        | 6.063038 | 9.59E-09 | 3641605 |
| TLO9        | 6.05133  | 3.76E-07 | 3648051 |
| TFP1        | 6.044547 | 1.43E-11 | 3636662 |
| C2_04830W_A | 6.021559 | 0.013718 | 3648115 |
| CIT1        | 6.011129 | 9.75E-09 | 3643201 |
| C4_00410W_A | 6.005538 | 3.48E-06 | 3645019 |
| BNR1        | 5.976704 | 1.49E-05 | 3639672 |
| FGR34       | 5.954773 | 3.17E-07 | 3639033 |

|             |          |          |          |
|-------------|----------|----------|----------|
| TPI1        | 5.950175 | 1.46E-16 | 3638482  |
| CR_01070W_A | 5.92746  | 0.011552 | 3640382  |
| CDC50       | 5.919618 | 4.71E-06 | 3640302  |
| ARC40       | 5.919195 | 3.41E-08 | 3644866  |
| NIF3        | 5.914701 | 0.000242 | 3646527  |
| C4_02470C_A | 5.91234  | 1.23E-08 | 3637869  |
| GRP1        | 5.911311 | 0.011015 | 3634899  |
| CSE4        | 5.910877 | 9.48E-05 | 3647750  |
| C1_02650W_A | 5.902907 | 4.26E-07 | 3636818  |
| C3_06920W_A | 5.899007 | 6.84E-05 | 3638511  |
| ZRT2        | 5.898691 | 1.55E-06 | 3635861  |
| C4_04330C_A | 5.88892  | 5.36E-10 | 3646840  |
| C6_04120C_A | 5.883169 | 5E-06    | 3647974  |
| CR_01080W_A | 5.882735 | 3.88E-08 | 3640381  |
| CRN1        | 5.868345 | 1.57E-08 | 3637034  |
| TLO1        | 5.866836 | 4.7E-07  | 3639677  |
| SNL1        | 5.860615 | 9.82E-06 | 3647192  |
| CTA2        | 5.853206 | 3.59E-08 | 3639372  |
| CDC24       | 5.840882 | 8.64E-09 | 3643737  |
| C3_03510C_A | 5.829573 | 1.76E-05 | 3638310  |
| PLD1        | 5.811747 | 1.19E-11 | 3645329  |
| YPT31       | 5.803956 | 9.56E-09 | 3647999  |
| C7_03800W_A | 5.80235  | 0.00407  | 3643150  |
| CR_09530C_A | 5.800872 | 4.65E-10 | 3647101  |
| PXA2        | 5.798773 | 5.31E-08 | 3642055  |
| C2_10860C_A | 5.785455 | 3.27E-09 | 3641233  |
| C1_02370C_A | 5.742169 | 7.24E-05 | 3644576  |
| C1_12880C_A | 5.741625 | 6.21E-06 | 3636151  |
| C4_04920W_A | 5.735818 | 0.000912 | 3641172  |
| IDP1        | 5.732975 | 1.68E-05 | 3647474  |
| ALG9        | 5.715766 | 3.95E-07 | 3644457  |
| DOT1        | 5.712578 | 6.9E-06  | 3642236  |
| C2_01160W_A | 5.684851 | 0.000355 | 3638861  |
| SPF1        | 5.678815 | 9.8E-10  | 3646573  |
| USO5        | 5.659631 | 0.00125  | 3638398  |
| C6_00270W_A | 5.654231 | 7.84E-06 | 3646066  |
| RTS1        | 5.64666  | 5.15E-12 | 3646557  |
| ERG12       | 5.625544 | 6.71E-06 | 3634859  |
| MES1        | 5.608782 | 7.88E-08 | 3636516  |
| PST3        | 5.604963 | 3.27E-07 | 3648031  |
| C1_00450C_A | 5.602404 | 2.74E-05 | 30514955 |
| C1_01250W_A | 5.586444 | 2.82E-06 | 3640212  |
| IFA4        | 5.58394  | 0.013291 | 3645454  |
| C5_00840W_A | 5.576299 | 0.013645 | 3644130  |
| C7_03410C_A | 5.568258 | 0.000102 | 3646716  |
| CLA4        | 5.56094  | 1.38E-08 | 3634878  |
| ACO2        | 5.552957 | 0.005359 | 3646708  |

|             |          |          |         |
|-------------|----------|----------|---------|
| MNN24       | 5.542913 | 1.88E-08 | 3638789 |
| C2_07420W_A | 5.539326 | 0.000165 | 3645202 |
| C4_06810C_A | 5.535985 | 1.52E-08 | 3642916 |
| SMC5        | 5.527198 | 0.00116  | 3645103 |
| ERG1        | 5.524911 | 2.49E-13 | 3646509 |
| C5_04420W_A | 5.520954 | 0.000114 | 3636411 |
| FESUR1      | 5.50818  | 1.05E-07 | 3638514 |
| CR_05010W_A | 5.506191 | 0.014991 | 3646389 |
| C3_01510W_A | 5.503189 | 0.000136 | 3636571 |
| GCF1        | 5.462695 | 5.2E-10  | 3646498 |
| ZRT1        | 5.445165 | 0.018221 | 3642970 |
| RBT5        | 5.440724 | 4.67E-15 | 3645007 |
| CR_02620C_A | 5.43208  | 6.94E-06 | 3642567 |
| GPX3        | 5.430921 | 0.001406 | 3644471 |
| C1_12400C_A | 5.426034 | 0.001425 | 3642059 |
| C1_02780W_A | 5.421578 | 8.11E-07 | 3636871 |
| C5_01410C_A | 5.421089 | 4.67E-06 | 3647054 |
| PMT5        | 5.41618  | 0.000717 | 3639011 |
| FGR29       | 5.403552 | 0.001001 | 3641190 |
| FUM12       | 5.399649 | 2.37E-08 | 3638489 |
| C2_05560W_A | 5.395828 | 0.005705 | 3645561 |
| APG7        | 5.378236 | 0.000603 | 3646615 |
| ERG27       | 5.376908 | 2.91E-06 | 3640432 |
| C7_02080W_A | 5.375502 | 0.001878 | 3637025 |
| RPP1B       | 5.374586 | 1.09E-08 | 3643104 |
| C1_10730W_A | 5.353166 | 1.39E-05 | 3644404 |
| SAH1        | 5.346672 | 1.2E-11  | 3636452 |
| C1_14240W_A | 5.334143 | 7.21E-07 | 3643306 |
| TYR1        | 5.329202 | 5.68E-05 | 3635639 |
| CR_04870C_A | 5.320423 | 0.016499 | 3647310 |
| CAC2        | 5.320423 | 0.016514 | 3646978 |
| C2_05130W_A | 5.312735 | 0.002104 | 3643458 |
| C6_03310W_A | 5.29924  | 1.24E-05 | 3639197 |
| FGR38       | 5.288254 | 2.15E-05 | 3645412 |
| SEC62       | 5.283358 | 1.05E-05 | 3636860 |
| RFC2        | 5.273935 | 0.005711 | 3637939 |
| C2_08340C_A | 5.265967 | 0.000357 | 3648165 |
| C3_03160C_A | 5.254191 | 0.017646 | 3638424 |
| LEU2        | 5.22374  | 0.005901 | 3638034 |
| PYC2        | 5.221457 | 5.27E-11 | 3637323 |
| ENA21       | 5.220159 | 1.91E-08 | 3641392 |
| DSL1        | 5.182111 | 0.005824 | 3645718 |
| ATP7        | 5.181914 | 7.27E-06 | 3646672 |
| C4_04160W_A | 5.176446 | 3.27E-08 | 3641185 |
| ABP1        | 5.171068 | 3.99E-09 | 3637875 |
| CPR3        | 5.16244  | 2.01E-08 | 3635812 |
| TIP1        | 5.154437 | 0.001036 | 3636512 |

|             |          |          |          |
|-------------|----------|----------|----------|
| CR_07170W_A | 5.15195  | 4.65E-06 | 3645271  |
| C1_05920W_A | 5.151578 | 0.000102 | 3639864  |
| ACS1        | 5.142748 | 5.08E-10 | 3643941  |
| C1_04030W_A | 5.139041 | 0.007485 | 3646428  |
| NPT1        | 5.132033 | 4.38E-06 | 3643109  |
| C2_05850C_A | 5.123361 | 0.000123 | 3647472  |
| JEM1        | 5.123227 | 0.019188 | 3643876  |
| SAS2        | 5.11847  | 0.019383 | 3638817  |
| NPL4        | 5.116065 | 0.000126 | 3639820  |
| PDC11       | 5.114137 | 7.33E-15 | 3642780  |
| SEC61       | 5.094066 | 2.41E-09 | 3647462  |
| PMS1        | 5.092798 | 0.006539 | 3647714  |
| GPI7        | 5.091507 | 0.000293 | 3647672  |
| C1_01050C_A | 5.084319 | 9.94E-06 | 3640170  |
| C2_05170W_A | 5.05579  | 0.000244 | 3643462  |
| C1_11860W_A | 5.049583 | 4.71E-08 | 3642009  |
| C1_07040C_A | 5.042359 | 0.002647 | 3639533  |
| C2_01320W_A | 5.038038 | 1.4E-05  | 3638846  |
| CR_04080C_A | 5.0326   | 6.49E-09 | 3641023  |
| RPS7A       | 5.025355 | 2.65E-09 | 3636573  |
| RAD51       | 5.023679 | 2.09E-06 | 3644944  |
| ZCF24       | 5.02241  | 0.002711 | 3645417  |
| MDH1-3      | 5.003883 | 4.25E-06 | 3641197  |
| C3_04970C_A | 5.003507 | 6.68E-08 | 3635164  |
| MAE1        | 5.000903 | 1.67E-10 | 3641615  |
| C4_02400C_A | 4.989734 | 0.007671 | 3637851  |
| SET3        | 4.98443  | 1.47E-10 | 3643320  |
| C2_02390W_A | 4.980187 | 5.43E-12 | 3635829  |
| MNN10       | 4.973065 | 2.29E-05 | 3644997  |
| C6_02160W_A | 4.968333 | 0.001104 | 3645889  |
| PET9        | 4.945094 | 3.45E-15 | 3641587  |
| C3_00210C_A | 4.929666 | 0.022963 | 3640560  |
| KIP4        | 4.92692  | 5.53E-08 | 3642032  |
| CTA24       | 4.912857 | 2.52E-08 | 3636475  |
| C2_03210W_A | 4.912298 | 0.024345 | 30515098 |
| C1_12240C_A | 4.90766  | 0.000496 | 3642023  |
| C1_08800W_A | 4.903442 | 0.00012  | 3634791  |
| FGR51       | 4.902489 | 0.000136 | 3647796  |
| MPT5        | 4.901949 | 1.43E-05 | 3636205  |
| C1_06480C_A | 4.894841 | 0.000111 | 30515008 |
| ARP2        | 4.876935 | 8.16E-09 | 3641915  |
| TOP2        | 4.875902 | 2.39E-05 | 3642777  |
| RPP1A       | 4.87197  | 4.61E-08 | 3636839  |
| C1_07440W_A | 4.866918 | 3.25E-08 | 3644482  |
| ARP1        | 4.86523  | 0.026135 | 3646349  |
| RCT1        | 4.862239 | 2.17E-12 | 3641727  |
| APT1        | 4.86149  | 3.03E-05 | 3635842  |



|             |          |          |          |
|-------------|----------|----------|----------|
| C2_03340W_A | 4.857356 | 0.000198 | 3637392  |
| ALS1        | 4.844023 | 8.13E-15 | 3640280  |
| CHS6        | 4.835612 | 5.72E-05 | 3641377  |
| SGT2        | 4.834307 | 1.15E-08 | 3642978  |
| RIM1        | 4.823543 | 1.34E-05 | 3639898  |
| LAP3        | 4.812732 | 2.86E-06 | 3641012  |
| APM1        | 4.811741 | 1.68E-05 | 3636424  |
| AMN1        | 4.802065 | 0.001683 | 3635795  |
| CR_09750C_A | 4.79744  | 1.15E-07 | 3639009  |
| CR_04500C_A | 4.793084 | 6.23E-05 | 3641014  |
| TSC11       | 4.791043 | 0.025969 | 3645267  |
| CR_02380C_A | 4.789297 | 0.027321 | 3644931  |
| C2_09650W_A | 4.781527 | 4.83E-09 | 3643794  |
| C1_10460W_A | 4.777476 | 1.33E-06 | 3647183  |
| CR_04730W_A | 4.77224  | 0.008317 | 3647305  |
| END3        | 4.753791 | 7.13E-05 | 3636644  |
| HIS7        | 4.751371 | 0.000724 | 3647868  |
| WBP1        | 4.749936 | 3.71E-08 | 3644398  |
| SER1        | 4.74074  | 6.43E-06 | 3646909  |
| HEM14       | 4.729932 | 8.12E-05 | 3634923  |
| EFB1        | 4.717119 | 2.18E-10 | 3641125  |
| SEC72       | 4.71559  | 3.63E-05 | 3645768  |
| LIP8        | 4.698333 | 0.000329 | 3646727  |
| CR_07230W_A | 4.690092 | 0.000113 | 3646031  |
| C1_11120C_A | 4.686563 | 4.58E-08 | 3644412  |
| APN1        | 4.679668 | 8.8E-05  | 3642263  |
| HBR2        | 4.676668 | 9.69E-08 | 3646273  |
| GRS1        | 4.675801 | 9.01E-10 | 3642474  |
| SHM2        | 4.65971  | 5.84E-10 | 3640306  |
| HFL1        | 4.658173 | 0.030459 | 3636883  |
| C3_04080W_A | 4.608218 | 3.87E-07 | 30515200 |
| C3_06610W_A | 4.601129 | 0.000268 | 3642248  |
| C6_01750C_A | 4.594481 | 0.031586 | 3641640  |
| EAP1        | 4.593713 | 1.45E-08 | 3643814  |
| C1_04580C_A | 4.590598 | 0.000295 | 3646132  |
| PTC6        | 4.582483 | 5.29E-05 | 3647351  |
| HYU1        | 4.56372  | 3.32E-07 | 3643024  |
| C1_13280C_A | 4.561967 | 0.000202 | 3636145  |
| SHP1        | 4.560839 | 4.64E-08 | 3640083  |
| GSP1        | 4.560464 | 2.22E-09 | 3646925  |
| C1_02320C_A | 4.559506 | 4.92E-08 | 3644572  |
| C3_00910W_A | 4.559009 | 0.010622 | 3647755  |
| BEM2        | 4.544883 | 1.87E-08 | 3637044  |
| MMD1        | 4.539701 | 1.04E-07 | 30515015 |
| C5_03780C_A | 4.536258 | 0.03366  | 3647232  |
| C1_02970W_A | 4.530646 | 2.21E-07 | 3636835  |
| LEU1        | 4.530288 | 6.85E-07 | 3639685  |

|             |          |          |          |
|-------------|----------|----------|----------|
| C3_01820W_A | 4.53021  | 9.9E-07  | 3636584  |
| C2_09250W_A | 4.527062 | 0.03431  | 3644065  |
| POL3        | 4.523402 | 1.3E-05  | 3641359  |
| CR_05450C_A | 4.52183  | 0.001091 | 3648236  |
| CR_04880W_A | 4.512655 | 0.005846 | 3647309  |
| C3_04630W_A | 4.506323 | 0.001661 | 3635189  |
| CR_09010C_A | 4.499557 | 4.44E-07 | 3641892  |
| RPL20B      | 4.497022 | 3E-07    | 3635615  |
| C3_03080W_A | 4.488886 | 0.001248 | 3638397  |
| CR_09670C_A | 4.485534 | 0.000195 | 3647091  |
| SEC24       | 4.484766 | 9.27E-10 | 3634939  |
| APL5        | 4.481823 | 1.65E-05 | 3638377  |
| MSH2        | 4.471674 | 7.79E-06 | 3642939  |
| SEC27       | 4.468814 | 1.35E-07 | 3645870  |
| C3_04460W_A | 4.46621  | 2.17E-05 | 3635208  |
| C4_03720C_A | 4.45977  | 7.75E-05 | 3645359  |
| C1_13810W_A | 4.455856 | 6.48E-06 | 3636126  |
| C4_01840C_A | 4.453632 | 0.000555 | 3635592  |
| MON2        | 4.450766 | 1.77E-07 | 3636201  |
| C4_04090C_A | 4.449859 | 0.000427 | 3641225  |
| C2_03450W_A | 4.436123 | 0.006239 | 3637349  |
| C2_09910C_A | 4.427033 | 0.039452 | 30515162 |
| IDH2        | 4.417006 | 2.33E-09 | 3642979  |
| ARO3        | 4.417004 | 2.14E-05 | 3635770  |
| C3_02190C_A | 4.413552 | 1.55E-05 | 3636642  |
| RFC4        | 4.411984 | 0.000454 | 3638994  |
| C3_04740C_A | 4.408356 | 0.012239 | 3635251  |
| MP65        | 4.405542 | 1.57E-12 | 3643951  |
| MNN2        | 4.403548 | 8.8E-05  | 3644405  |
| ARL3        | 4.397841 | 0.000235 | 3644397  |
| RNR21       | 4.368677 | 6.86E-08 | 3643021  |
| SEC26       | 4.362426 | 3.45E-08 | 3641005  |
| C4_03810W_A | 4.360424 | 0.000591 | 3645350  |
| CR_01430W_A | 4.358867 | 0.0166   | 3640138  |
| ADE5,7      | 4.358559 | 1.17E-09 | 3640719  |
| C4_03990C_A | 4.354535 | 0.042388 | 3648295  |
| C3_04590W_A | 4.3503   | 1.34E-07 | 30515204 |
| C3_01910C_A | 4.34721  | 8.4E-06  | 30515182 |
| ARP9        | 4.344474 | 0.000233 | 3639829  |
| C3_07450C_A | 4.336863 | 0.007279 | 3638481  |
| C7_00150W_A | 4.326874 | 9.78E-08 | 3637973  |
| C1_11250W_A | 4.322569 | 3.07E-05 | 3644556  |
| C1_01010W_A | 4.321023 | 9.88E-05 | 3640181  |
| C1_11740W_A | 4.311867 | 0.013615 | 3645317  |
| CR_08670C_A | 4.310127 | 0.011438 | 3642126  |
| FBA1        | 4.30633  | 1.43E-12 | 3635585  |
| RPL18       | 4.305872 | 1.07E-07 | 3635156  |

|             |          |          |          |
|-------------|----------|----------|----------|
| SHM1        | 4.304275 | 1.98E-07 | 3646724  |
| CRC1        | 4.303743 | 0.000269 | 3640112  |
| ARO4        | 4.300636 | 3.21E-07 | 3647668  |
| YBN5        | 4.291708 | 2.47E-07 | 3644781  |
| GLO2        | 4.286105 | 0.001691 | 3644067  |
| ANB1        | 4.279762 | 1.84E-07 | 3641648  |
| C7_01480W_A | 4.279339 | 0.001861 | 3636956  |
| BUB2        | 4.271703 | 0.040318 | 3643030  |
| ASR1        | 4.252986 | 4.76E-07 | 3644402  |
| DCK1        | 4.248252 | 6.55E-12 | 3637383  |
| RPL10A      | 4.244263 | 1.59E-07 | 3645868  |
| RPL35       | 4.244227 | 1.24E-05 | 30515207 |
| C1_00920W_A | 4.243463 | 3.05E-05 | 3639283  |
| C2_07110C_A | 4.234596 | 0.003377 | 3643505  |
| LTE1        | 4.233413 | 1.03E-07 | 3643495  |
| C6_01560W_A | 4.223842 | 0.008787 | 3641652  |
| C1_06200W_A | 4.210066 | 7.02E-05 | 3648300  |
| ADE13       | 4.203371 | 3.84E-08 | 3644863  |
| CR_06560C_A | 4.202478 | 3.83E-06 | 3648367  |
| C2_02530W_A | 4.201696 | 0.00422  | 3635819  |
| KTR2        | 4.200703 | 0.043864 | 3645443  |
| CR_02570C_A | 4.192683 | 0.004165 | 3647685  |
| UAP1        | 4.192342 | 4.94E-07 | 3637769  |
| C2_07270W_A | 4.180216 | 0.001277 | 3643474  |
| CR_01180W_A | 4.17633  | 0.000283 | 3640427  |
| C6_02030C_A | 4.171694 | 6.1E-05  | 3647562  |
| C1_03440C_A | 4.16333  | 4.28E-06 | 3636908  |
| KEX2        | 4.157737 | 1.65E-07 | 3634914  |
| CDC7        | 4.151488 | 0.00226  | 3643424  |
| C1_07840W_A | 4.151236 | 1E-07    | 3640737  |
| C2_10830W_A | 4.141881 | 0.045652 | 30515170 |
| C4_05810W_A | 4.140344 | 4.04E-08 | 3641786  |
| KIP3        | 4.122413 | 0.00905  | 3641716  |
| TRP99       | 4.121301 | 7.22E-05 | 3642494  |
| GDB1        | 4.120347 | 1.61E-07 | 3647409  |
| C1_07340W_A | 4.118047 | 2.76E-06 | 3644472  |
| POL2        | 4.115241 | 3.48E-05 | 3645733  |
| UBC15       | 4.112786 | 0.00071  | 3641260  |
| COX4        | 4.109181 | 3.34E-07 | 3635737  |
| CR_03020C_A | 4.105325 | 0.000656 | 3642598  |
| LYS12       | 4.102501 | 9.41E-06 | 3640134  |
| C5_01550C_A | 4.095191 | 1.22E-05 | 3647063  |
| YCG1        | 4.094922 | 8.16E-05 | 3636639  |
| C2_08650W_A | 4.093664 | 1.36E-05 | 3643908  |
| PXA1        | 4.090256 | 1.92E-07 | 3639713  |
| STE13       | 4.087343 | 0.002152 | 3647597  |
| SAC6        | 4.083395 | 5.75E-07 | 3639213  |

|             |          |          |          |
|-------------|----------|----------|----------|
| C1_09070W_A | 4.082113 | 2.5E-07  | 3634773  |
| C3_00470W_A | 4.078698 | 4.87E-05 | 3640520  |
| C1_12740W_A | 4.077297 | 1.46E-05 | 3646819  |
| CR_09840C_A | 4.074896 | 0.047485 | 3638988  |
| CR_08560C_A | 4.067326 | 2.15E-05 | 3642142  |
| C1_07780W_A | 4.058419 | 1.97E-05 | 3647955  |
| C7_01930C_A | 4.05414  | 0.001394 | 3637027  |
| PGA49       | 4.050576 | 0.00043  | 3646525  |
| SEC4        | 4.046363 | 1.91E-07 | 3640119  |
| C1_12700W_A | 4.044141 | 0.002199 | 3646831  |
| C1_10090C_A | 4.036895 | 5.43E-07 | 3634817  |
| RPL19A      | 4.034525 | 1.43E-09 | 3635257  |
| MAK32       | 4.032849 | 0.020331 | 3645411  |
| C2_09560C_A | 4.021665 | 6.51E-05 | 3643813  |
| C3_02210C_A | 4.018605 | 0.001092 | 3636641  |
| CR_02500W_A | 4.018452 | 0.007254 | 3647696  |
| SMI1B       | 4.017198 | 0.021273 | 3643675  |
| C7_00600C_A | 4.015888 | 0.009939 | 3638031  |
| RPS1        | 4.008904 | 4.08E-09 | 3636924  |
| C6_01960W_A | 4.007659 | 0.023025 | 3644559  |
| BET4        | 4.007087 | 0.048642 | 3644695  |
| SNG4        | 4.005396 | 4.09E-06 | 3646714  |
| CR_07350W_A | 4.00125  | 8.38E-07 | 3646055  |
| PSD2        | 4.001047 | 6.61E-08 | 3636515  |
| C1_14170W_A | 3.99716  | 1.24E-06 | 3643323  |
| C4_00380W_A | 3.995847 | 0.006964 | 3645015  |
| C7_00120W_A | 3.99424  | 0.00063  | 3637976  |
| RBF1        | 3.990933 | 0.000102 | 3639251  |
| C5_02400W_A | 3.987987 | 3.93E-07 | 3637724  |
| ERG7        | 3.980072 | 7.49E-07 | 3635761  |
| RPL28       | 3.977912 | 3.47E-08 | 30515386 |
| CAK1        | 3.969309 | 0.002017 | 3637352  |
| PDS5        | 3.969215 | 3.89E-05 | 3642341  |
| GLO1        | 3.960958 | 8.88E-06 | 3639312  |
| C1_06340W_A | 3.950688 | 0.010794 | 3639499  |
| MVB12       | 3.947865 | 0.010601 | 30515400 |
| GYP1        | 3.947422 | 6.93E-06 | 3641138  |
| PGA33       | 3.946693 | 0.000613 | 3637350  |
| C3_05550C_A | 3.936698 | 0.000307 | 3643659  |
| SEC34       | 3.934855 | 5.26E-06 | 3644455  |
| C1_00330C_A | 3.92947  | 0.003304 | 3639296  |
| CDC47       | 3.923167 | 1.16E-05 | 3645780  |
| C4_07240W_A | 3.923013 | 0.000183 | 3642945  |
| C4_00330C_A | 3.903292 | 1.41E-05 | 30515227 |
| RPS8A       | 3.902278 | 3.78E-08 | 3645565  |
| C6_03260W_A | 3.902167 | 2.14E-06 | 3639183  |
| RFC3        | 3.90022  | 0.021599 | 3647440  |

|             |          |          |          |
|-------------|----------|----------|----------|
| MNN21       | 3.89618  | 6.44E-05 | 3648124  |
| RBD1        | 3.895846 | 2.74E-07 | 3642018  |
| THS1        | 3.894928 | 8.02E-08 | 3647882  |
| C3_05410W_A | 3.893253 | 1.23E-06 | 3643665  |
| CHT4        | 3.891242 | 0.023823 | 3635768  |
| HEM13       | 3.880623 | 4.22E-08 | 3647390  |
| C4_03050C_A | 3.880615 | 0.002421 | 3637930  |
| PRE2        | 3.871251 | 1.65E-06 | 3643490  |
| ERG8        | 3.869657 | 4.15E-05 | 3635640  |
| COX6        | 3.867827 | 5.96E-07 | 30515099 |
| FRE7        | 3.867645 | 0.000153 | 3646024  |
| UBA2        | 3.865193 | 0.00246  | 3640701  |
| C3_00790W_A | 3.856582 | 0.002757 | 3648186  |
| GNA1        | 3.855674 | 0.003339 | 3637397  |
| C2_01690W_A | 3.848701 | 7.75E-07 | 3635728  |
| CR_04020C_A | 3.844879 | 0.003815 | 3640969  |
| UGP1        | 3.840224 | 3.87E-09 | 3648144  |
| C1_13320C_A | 3.823106 | 8.93E-07 | 3636149  |
| C3_03340C_A | 3.817888 | 0.000731 | 30515195 |
| PLC1        | 3.810513 | 0.000768 | 3647860  |
| SCL1        | 3.803621 | 1.01E-06 | 3640510  |
| ZCF39       | 3.800071 | 9.23E-08 | 3639037  |
| COQ3        | 3.799416 | 0.00091  | 3641630  |
| C4_01760W_A | 3.796863 | 6.93E-05 | 3635584  |
| ILV6        | 3.783908 | 0.000125 | 3635598  |
| CR_04560C_A | 3.781311 | 0.003071 | 3640946  |
| FRE30       | 3.776211 | 0.000456 | 3646025  |
| DQD1        | 3.775649 | 0.003061 | 3643488  |
| C6_03580W_A | 3.773204 | 0.012214 | 3640250  |
| PEX6        | 3.764986 | 0.000554 | 3643436  |
| LRO1        | 3.763657 | 3.94E-06 | 3639356  |
| ARC19       | 3.762429 | 0.026322 | 3640418  |
| C6_01050W_A | 3.762213 | 0.000744 | 3644015  |
| C7_02100W_A | 3.759138 | 7.91E-07 | 3637023  |
| C5_04770W_A | 3.755994 | 0.003314 | 3636444  |
| HGT7        | 3.745356 | 1.99E-11 | 3638876  |
| ATP16       | 3.741716 | 5.09E-07 | 3638963  |
| CR_07370W_A | 3.739389 | 0.001723 | 3646053  |
| MCT1        | 3.739183 | 0.000106 | 3646683  |
| C3_06690C_A | 3.722534 | 0.009632 | 3642256  |
| AMO2        | 3.72126  | 0.028424 | 3648021  |
| ECM39       | 3.716236 | 0.003094 | 3641386  |
| AIP2        | 3.711793 | 5.04E-07 | 3638393  |
| C1_10320W_A | 3.70886  | 0.001184 | 3634907  |
| CNB1        | 3.707078 | 0.000764 | 3636463  |
| C3_01210C_A | 3.704748 | 1.45E-05 | 3636612  |
| XKS1        | 3.69496  | 3.58E-06 | 3648306  |

|             |          |          |          |
|-------------|----------|----------|----------|
| HEM4        | 3.688801 | 0.010327 | 3643942  |
| GPR1        | 3.685655 | 2.83E-06 | 3642616  |
| CMD1        | 3.668275 | 2.77E-07 | 3646520  |
| ISC1        | 3.668254 | 0.01436  | 3646705  |
| IFK2        | 3.666597 | 0.004523 | 3637439  |
| C6_00890W_A | 3.660086 | 7.7E-08  | 3644028  |
| KRE5        | 3.648251 | 0.000105 | 3638384  |
| C5_01220W_A | 3.641778 | 1.13E-05 | 3642620  |
| C5_02050W_A | 3.63684  | 1.67E-06 | 3643768  |
| C2_05800C_A | 3.632722 | 0.000603 | 3645584  |
| C1_02290C_A | 3.63204  | 0.014481 | 3644568  |
| REV3        | 3.620795 | 0.000168 | 3641749  |
| RIB5        | 3.616221 | 6.65E-07 | 3636499  |
| C6_04250W_A | 3.613162 | 2.14E-06 | 30515345 |
| SEC3        | 3.610526 | 4.21E-06 | 3642806  |
| C5_02900W_A | 3.608352 | 8.89E-05 | 3637747  |
| C3_05300C_A | 3.602819 | 0.017078 | 3643646  |
| EIF4E       | 3.585272 | 1.88E-05 | 3638981  |
| C2_07980W_A | 3.580029 | 0.014211 | 3642312  |
| MUM2        | 3.5737   | 2.27E-05 | 3636432  |
| CR_08050C_A | 3.55979  | 1.28E-06 | 3644133  |
| BUD7        | 3.559085 | 1.5E-06  | 3647228  |
| ROB1        | 3.554709 | 1.1E-06  | 3636212  |
| C6_00920W_A | 3.554118 | 0.000294 | 3644031  |
| GEA2        | 3.54232  | 2.63E-05 | 3636646  |
| C3_06860C_A | 3.538355 | 2.95E-05 | 3638541  |
| PNP1        | 3.536791 | 3.78E-05 | 3638426  |
| CR_10020C_A | 3.536736 | 0.003019 | 3639032  |
| C3_01720C_A | 3.532007 | 2.01E-06 | 3636601  |
| C4_04280C_A | 3.531882 | 0.039524 | 3646846  |
| YSA1        | 3.531622 | 0.003322 | 3638516  |
| OBPA        | 3.531384 | 5.86E-07 | 3643764  |
| OCA6        | 3.530182 | 0.035676 | 3643336  |
| C1_10630C_A | 3.526559 | 0.01657  | 3647683  |
| PGA59       | 3.524902 | 7.74E-10 | 3637881  |
| C2_04410W_A | 3.516472 | 0.003245 | 3645455  |
| C7_03660C_A | 3.492643 | 3.17E-07 | 3646226  |
| C6_03990C_A | 3.491981 | 0.014574 | 3640271  |
| C2_04490W_A | 3.488397 | 3.1E-05  | 3645463  |
| C6_00200C_A | 3.485133 | 0.000165 | 3646082  |
| MSO1        | 3.484604 | 4.86E-06 | 3642040  |
| FLC2        | 3.481019 | 2.36E-06 | 3647962  |
| C7_03200C_A | 3.478662 | 0.001467 | 3641342  |
| VMA4        | 3.475399 | 7.72E-06 | 3640111  |
| C1_04190C_A | 3.469086 | 0.006327 | 3644717  |
| C1_02680C_A | 3.467074 | 0.003939 | 3636822  |
| C3_04810C_A | 3.46589  | 1.71E-06 | 30515205 |

|             |          |          |          |
|-------------|----------|----------|----------|
| PGA13       | 3.46242  | 0.009748 | 3642138  |
| APS3        | 3.456985 | 0.018028 | 3646491  |
| C6_03820C_A | 3.456443 | 0.000199 | 3640288  |
| C2_02840C_A | 3.452996 | 0.000257 | 3642976  |
| C6_02470W_A | 3.452356 | 0.000244 | 3639169  |
| CR_05880W_A | 3.450095 | 0.020397 | 3646702  |
| AHP1        | 3.443966 | 1.11E-07 | 3637850  |
| C7_03050W_A | 3.429788 | 0.003968 | 3641378  |
| C6_04340W_A | 3.424175 | 0.001059 | 3646291  |
| C7_00420C_A | 3.420724 | 0.004433 | 3638032  |
| RPN7        | 3.420214 | 3.62E-06 | 3641909  |
| RPS26A      | 3.41782  | 1.04E-05 | 3635787  |
| BNI4        | 3.412552 | 0.000142 | 3646406  |
| C4_04250W_A | 3.411449 | 0.001236 | 3646855  |
| BRN1        | 3.409033 | 0.004821 | 3641815  |
| C1_02060W_A | 3.408492 | 0.0037   | 30514968 |
| C1_13190W_A | 3.405297 | 1.21E-07 | 3636163  |
| NCE4        | 3.393351 | 0.043088 | 3641194  |
| ARH2        | 3.387865 | 0.00141  | 3643411  |
| PGA52       | 3.385157 | 3.16E-06 | 3647908  |
| ALG7        | 3.381445 | 0.000706 | 3642291  |
| C1_00320W_A | 3.374982 | 0.004336 | 3639297  |
| C1_04280C_A | 3.371444 | 0.047646 | 3644709  |
| C6_02490C_A | 3.361524 | 0.001034 | 3639171  |
| CR_01300W_A | 3.360644 | 0.002653 | 30515373 |
| MCI4        | 3.358571 | 0.000707 | 3640118  |
| C1_06190C_A | 3.357098 | 1.16E-06 | 3648391  |
| MSI3        | 3.35631  | 7.3E-06  | 3639821  |
| PIKA        | 3.354817 | 4.92E-05 | 3643765  |
| C1_08780W_A | 3.350181 | 3.45E-05 | 3634789  |
| CR_02260C_A | 3.346211 | 0.02357  | 3644912  |
| C1_01360C_A | 3.339631 | 3.54E-06 | 3640191  |
| GTR1        | 3.333435 | 0.004717 | 3643914  |
| AGO1        | 3.326907 | 6.97E-06 | 3642828  |
| C3_01420C_A | 3.324142 | 0.017443 | 3636634  |
| TFS1        | 3.317916 | 9.29E-06 | 3642655  |
| BET2        | 3.315102 | 0.006239 | 3639025  |
| DPB2        | 3.311326 | 0.024344 | 3639026  |
| GLX3        | 3.311239 | 4.51E-07 | 3638325  |
| C1_14530W_A | 3.303632 | 0.000259 | 3643333  |
| CR_03530W_A | 3.291479 | 4.37E-06 | 3643204  |
| LPD1        | 3.290654 | 3.83E-07 | 3646037  |
| BMT3        | 3.284622 | 0.003826 | 3640439  |
| C2_01930C_A | 3.276089 | 0.000373 | 3635793  |
| GRE3        | 3.27566  | 3.35E-06 | 3637811  |
| PPH21       | 3.274533 | 1.14E-05 | 3636665  |
| C3_07460W_A | 3.271449 | 0.00017  | 3638480  |

|             |          |          |          |
|-------------|----------|----------|----------|
| C1_04560W_A | 3.267656 | 0.002106 | 3646130  |
| CYP5        | 3.262051 | 5.06E-06 | 3642257  |
| CDC73       | 3.257675 | 0.000478 | 3636830  |
| ASR3        | 3.256755 | 7.7E-06  | 3637402  |
| MMS22       | 3.248272 | 0.0273   | 3639681  |
| ACE2        | 3.242796 | 2.71E-05 | 3646034  |
| C4_05800C_A | 3.24063  | 0.028883 | 3641785  |
| C7_00520W_A | 3.237006 | 1.82E-05 | 3638001  |
| MCM1        | 3.217991 | 1.31E-05 | 3638050  |
| C6_00540W_A | 3.210291 | 0.029069 | 3647146  |
| C1_08680C_A | 3.195963 | 0.000694 | 3634933  |
| CR_05330W_A | 3.193649 | 0.032987 | 30515404 |
| UBI3        | 3.193105 | 1.13E-06 | 3642934  |
| PKH3        | 3.188807 | 3.6E-06  | 3646075  |
| ENO1        | 3.187419 | 8.8E-09  | 3646493  |
| C4_01910W_A | 3.185594 | 0.006769 | 3635635  |
| C3_01180C_A | 3.183587 | 0.000183 | 3647960  |
| ATP20       | 3.175793 | 0.002465 | 3647602  |
| TKL1        | 3.171513 | 3.06E-08 | 3640767  |
| PGA14       | 3.16679  | 4.45E-07 | 3641560  |
| NUP159      | 3.166775 | 3.1E-06  | 3647458  |
| C3_04650W_A | 3.164162 | 0.020693 | 3635192  |
| C2_06110W_A | 3.161751 | 0.000338 | 3644094  |
| C3_00010C_A | 3.159788 | 1.21E-05 | 3640600  |
| PMT6        | 3.159053 | 0.000155 | 3641116  |
| RPP0        | 3.158354 | 9.97E-08 | 3638023  |
| SRD1        | 3.158159 | 0.001883 | 3635764  |
| C7_00920C_A | 3.15636  | 0.000786 | 3637957  |
| ALG2        | 3.150181 | 0.000878 | 3647832  |
| C3_04800C_A | 3.14958  | 0.001615 | 3635216  |
| C4_06940C_A | 3.148927 | 0.020906 | 3642928  |
| FEN12       | 3.134875 | 0.000153 | 3637404  |
| C2_04170C_A | 3.134568 | 7.17E-06 | 30515111 |
| RNH1        | 3.131154 | 0.004666 | 3639237  |
| RPS16A      | 3.130037 | 2.88E-06 | 30514974 |
| C5_00750C_A | 3.129349 | 6.43E-05 | 3644121  |
| PHO88       | 3.128386 | 7.37E-05 | 3641898  |
| C2_08620W_A | 3.126618 | 5.73E-05 | 3643912  |
| ARC15       | 3.12561  | 0.005027 | 3646043  |
| RPN8        | 3.122803 | 1.81E-05 | 3643770  |
| COQ6        | 3.116387 | 3.35E-05 | 3636878  |
| RPB11       | 3.116136 | 0.046753 | 30514957 |
| RNA1        | 3.114852 | 3.38E-06 | 3636595  |
| C6_04560W_A | 3.114224 | 3.59E-06 | 3645977  |
| FRS1        | 3.110569 | 1.7E-06  | 3640121  |
| C4_00590C_A | 3.095626 | 3.1E-05  | 3645772  |
| C2_00870W_A | 3.090306 | 0.022563 | 3638804  |



|             |          |          |          |
|-------------|----------|----------|----------|
| ARO2        | 3.088934 | 5.99E-05 | 3648190  |
| CR_08900C_A | 3.081089 | 0.000532 | 3641908  |
| C2_00730C_A | 3.080022 | 0.006171 | 3638913  |
| PAN3        | 3.07884  | 0.000252 | 3636464  |
| SSB1        | 3.076467 | 5.36E-08 | 3642095  |
| C5_00790C_A | 3.074347 | 6.37E-06 | 3644125  |
| VAC8        | 3.06824  | 1.57E-05 | 3647410  |
| C3_03840C_A | 3.06594  | 0.002284 | 3645628  |
| C1_00630W_A | 3.064151 | 0.022475 | 3639380  |
| C1_04620W_A | 3.058129 | 2.41E-05 | 3646135  |
| C6_00910C_A | 3.053586 | 4.92E-05 | 3644030  |
| ADP1        | 3.047736 | 4.46E-05 | 3642458  |
| C3_01950C_A | 3.042456 | 6.16E-05 | 3636599  |
| CR_10600C_A | 3.032234 | 1.55E-05 | 3639004  |
| C5_03400C_A | 3.031851 | 0.029072 | 30515308 |
| C7_02370W_A | 3.030207 | 5.25E-06 | 3636930  |
| C1_01000C_A | 3.030042 | 0.026361 | 3640180  |
| C1_10500W_A | 3.030009 | 0.02419  | 3647188  |
| RPS14B      | 3.028002 | 1.24E-05 | 30515006 |
| CYS4        | 3.021606 | 6.32E-05 | 3645429  |
| RPL17B      | 3.015674 | 4.98E-05 | 3645439  |
| MET13       | 3.015583 | 0.003421 | 3638382  |
| GPM1        | 3.012334 | 4.86E-08 | 3637431  |
| CR_02390W_A | 3.00883  | 2.51E-05 | 3644930  |
| C2_04330C_A | 3.006725 | 0.001948 | 3645453  |
| CR_09090C_A | 3.00555  | 0.023927 | 3641927  |
| C6_03330C_A | 2.9996   | 0.012186 | 3639199  |
| MEA1        | 2.998406 | 0.040377 | 3635154  |
| C1_04640W_A | 2.993562 | 0.000194 | 3644761  |
| RPL13       | 2.992073 | 8.45E-06 | 3636841  |
| MDL1        | 2.984889 | 0.000125 | 3640146  |
| RBK1        | 2.983782 | 0.00219  | 3646830  |
| PGA56       | 2.980901 | 3.94E-08 | 30515313 |
| SWC4        | 2.978935 | 0.000734 | 3639679  |
| YKU80       | 2.978614 | 0.012199 | 3645138  |
| C4_06240W_A | 2.977854 | 0.025358 | 3642807  |
| CR_08640C_A | 2.975811 | 1.1E-05  | 3642112  |
| C7_03260C_A | 2.975718 | 0.025227 | 3641366  |
| MKK2        | 2.971887 | 7.74E-05 | 3645580  |
| C4_06020C_A | 2.971383 | 0.00051  | 3646519  |
| HYM1        | 2.965219 | 0.000809 | 3637355  |
| C1_09750W_A | 2.964691 | 0.003491 | 3634822  |
| DBF4        | 2.964254 | 0.001909 | 3641388  |
| RFC1        | 2.961563 | 1.85E-05 | 3645582  |
| C3_04130W_A | 2.960584 | 0.000227 | 3635283  |
| C6_00080C_A | 2.958251 | 0.012589 | 3647899  |
| CR_02770C_A | 2.952083 | 0.007853 | 3642581  |

|             |          |          |          |
|-------------|----------|----------|----------|
| C2_10700C_A | 2.948504 | 0.001672 | 3641207  |
| SPC98       | 2.943513 | 0.007853 | 3640113  |
| C1_10680C_A | 2.937548 | 4.85E-05 | 3647678  |
| ARP8        | 2.937063 | 5.54E-05 | 3640200  |
| RPN6        | 2.929297 | 1.33E-05 | 3645352  |
| SEC1        | 2.925449 | 2.1E-05  | 3636935  |
| YMC1        | 2.924357 | 0.014008 | 3644474  |
| C3_06990W_A | 2.92389  | 0.047641 | 3638521  |
| MNN26       | 2.923358 | 0.004054 | 3646240  |
| PGA53       | 2.922257 | 0.008915 | 3635599  |
| SEC10       | 2.918028 | 9.48E-05 | 3642961  |
| RPS13       | 2.914791 | 1.23E-05 | 30515328 |
| GPA2        | 2.914057 | 0.000131 | 3636638  |
| C3_07820W_A | 2.912589 | 0.028027 | 3647463  |
| PHB2        | 2.912358 | 0.000103 | 3635238  |
| C4_06770W_A | 2.910597 | 0.000227 | 3642920  |
| OCH1        | 2.909814 | 0.00066  | 3641751  |
| RAD7        | 2.906874 | 0.00946  | 3635833  |
| RPN2        | 2.896304 | 4.74E-05 | 3642027  |
| C7_01740C_A | 2.893098 | 0.04693  | 3637010  |
| C5_00610C_A | 2.892812 | 0.025812 | 3641585  |
| CR_03130W_A | 2.892397 | 0.028279 | 3645121  |
| C4_05340W_A | 2.891962 | 0.003994 | 3646947  |
| RAV2        | 2.890591 | 0.024903 | 3639252  |
| APR1        | 2.88774  | 4.65E-05 | 3645204  |
| TLO34       | 2.887452 | 0.003151 | 3648392  |
| UBA1        | 2.875064 | 7.06E-05 | 3642286  |
| UGA11       | 2.872357 | 0.020111 | 3637437  |
| HFL2        | 2.870415 | 0.025966 | 3637833  |
| ETR1        | 2.860191 | 0.000141 | 3640561  |
| CTA7        | 2.858754 | 0.001162 | 3637776  |
| TRP3        | 2.857055 | 0.010478 | 3642035  |
| LCB2        | 2.854189 | 0.000199 | 3636181  |
| CDC68       | 2.849793 | 4.58E-05 | 3642787  |
| OSM2        | 2.847362 | 0.010897 | 3636193  |
| EMP70       | 2.846581 | 3.05E-05 | 3637919  |
| C3_03210W_A | 2.846153 | 0.028931 | 3638315  |
| C5_01350W_A | 2.842588 | 0.000519 | 3642640  |
| COX7        | 2.838228 | 0.000945 | 3638339  |
| C1_08900W_A | 2.832757 | 0.01064  | 3634925  |
| C2_07220W_A | 2.829129 | 6.67E-05 | 3643483  |
| MDM10       | 2.827889 | 0.021296 | 3647778  |
| IRR1        | 2.826196 | 0.000806 | 3643305  |
| RPL3        | 2.823648 | 4.54E-07 | 3647719  |
| TAF14       | 2.823018 | 7.31E-05 | 3637357  |
| CDC55       | 2.817762 | 8.33E-05 | 3635785  |
| C3_02720W_A | 2.810367 | 0.001661 | 3638410  |

|             |          |          |          |
|-------------|----------|----------|----------|
| FAT1        | 2.809509 | 0.000816 | 3647083  |
| NHX1        | 2.8091   | 0.000134 | 3647141  |
| SRV2        | 2.808149 | 4.19E-06 | 3640938  |
| PHB1        | 2.808135 | 0.001124 | 3645641  |
| URA6        | 2.808053 | 3.28E-05 | 3647988  |
| C1_08050W_A | 2.800824 | 0.000712 | 3640709  |
| RBP1        | 2.79984  | 8.8E-05  | 3647647  |
| C1_11600W_A | 2.798256 | 0.012585 | 3645346  |
| RPL37B      | 2.797341 | 2.41E-05 | 30515053 |
| C1_02830W_A | 2.795021 | 0.009841 | 3636876  |
| C6_03620C_A | 2.788125 | 0.003253 | 3640297  |
| CR_00350W_A | 2.785253 | 4.23E-05 | 3639686  |
| PMR1        | 2.785142 | 0.000168 | 3638043  |
| CR_04330W_A | 2.784471 | 0.022664 | 3640997  |
| C3_07140C_A | 2.782516 | 0.037978 | 3638439  |
| CR_05840W_A | 2.778412 | 0.024556 | 3646704  |
| C1_12660W_A | 2.774241 | 0.012273 | 3646835  |
| C7_02670W_A | 2.771837 | 0.029888 | 3647651  |
| DNM1        | 2.769578 | 1.97E-05 | 3643673  |
| RPL6        | 2.76723  | 7.87E-05 | 30514975 |
| CR_04120C_A | 2.757449 | 0.002994 | 3640972  |
| C1_01300W_A | 2.753053 | 9.04E-05 | 3640185  |
| RPS30       | 2.750157 | 0.001134 | 30515390 |
| CYC1        | 2.749126 | 0.000631 | 3643937  |
| CR_06790C_A | 2.744873 | 0.015213 | 3647311  |
| VPS11       | 2.744845 | 0.000299 | 3646524  |
| C2_00320W_A | 2.744154 | 0.003987 | 3638798  |
| DPS1-1      | 2.738976 | 1.33E-05 | 3645134  |
| PEX1        | 2.738971 | 0.001693 | 3636943  |
| SLC1        | 2.738358 | 0.003333 | 3638324  |
| VPS35       | 2.733799 | 4.94E-05 | 3645567  |
| C1_02040C_A | 2.733635 | 3.24E-05 | 3644586  |
| TEF1        | 2.732296 | 2.63E-07 | 3648254  |
| C1_09430W_A | 2.730107 | 0.000159 | 3634855  |
| YRB1        | 2.72904  | 0.000237 | 3639663  |
| MUQ1        | 2.723162 | 0.000835 | 3638898  |
| TOM70       | 2.715732 | 3.55E-05 | 3647645  |
| PRO3        | 2.714781 | 0.000299 | 3645036  |
| GDH3        | 2.713365 | 0.000102 | 3648086  |
| C4_04720W_A | 2.70802  | 0.004569 | 3641137  |
| C6_03040C_A | 2.707626 | 0.016587 | 3639269  |
| C2_07100W_A | 2.705711 | 0.000665 | 3643504  |
| PEP1        | 2.704654 | 8.98E-05 | 3647612  |
| USO1        | 2.699866 | 5.43E-05 | 3648280  |
| HAT2        | 2.698204 | 0.001502 | 3645973  |
| C1_05900W_A | 2.697049 | 0.000175 | 3639866  |
| HOG1        | 2.688325 | 7.47E-05 | 3637393  |

|             |          |          |          |
|-------------|----------|----------|----------|
| RPL5        | 2.685725 | 8.62E-06 | 3637057  |
| VPH1        | 2.683229 | 1.28E-05 | 3646157  |
| SPE1        | 2.682983 | 0.000377 | 3639327  |
| C2_07440C_A | 2.682978 | 0.011645 | 3645200  |
| C7_04280C_A | 2.680419 | 0.001928 | 3643173  |
| C7_02470C_A | 2.675936 | 0.011585 | 3636945  |
| C3_01900C_A | 2.674962 | 0.033376 | 3636559  |
| ERG20       | 2.67487  | 8.68E-05 | 3645440  |
| C1_11730W_A | 2.674446 | 0.000488 | 3645318  |
| ANP1        | 2.673574 | 0.006094 | 3643917  |
| NCP1        | 2.671406 | 9.55E-06 | 3637839  |
| EFT2        | 2.670722 | 1.37E-06 | 3642998  |
| C1_02000W_A | 2.670244 | 0.000926 | 3645418  |
| RPS6A       | 2.670197 | 0.000108 | 3635701  |
| C1_14050C_A | 2.670171 | 0.001729 | 3643343  |
| C4_00780C_A | 2.669098 | 0.000387 | 3645759  |
| GLT1        | 2.664095 | 2.86E-05 | 3639519  |
| CR_02680W_A | 2.66319  | 0.044508 | 3642573  |
| C2_01340W_A | 2.659629 | 0.000113 | 3638844  |
| SMC4        | 2.657372 | 0.000415 | 3641578  |
| CSP2        | 2.653075 | 0.02014  | 3645749  |
| HEM2        | 2.653045 | 0.000724 | 3637428  |
| SRO77       | 2.652884 | 0.000235 | 3646088  |
| C1_05720W_A | 2.649505 | 3.75E-05 | 30515000 |
| C1_02510W_A | 2.64623  | 0.04857  | 3636796  |
| C4_06740C_A | 2.64543  | 3.99E-05 | 3642923  |
| YST1        | 2.642216 | 7.97E-05 | 3643678  |
| C3_03560W_A | 2.640329 | 0.032115 | 3638299  |
| C3_00050C_A | 2.63561  | 0.018317 | 3640570  |
| TIP20       | 2.627824 | 0.00048  | 3636457  |
| SAC7        | 2.626749 | 0.000208 | 3638010  |
| C2_00830C_A | 2.626431 | 0.001726 | 3638808  |
| ADH1        | 2.624893 | 5.39E-06 | 3636489  |
| C6_02630C_A | 2.624045 | 0.000993 | 3639221  |
| C4_05850C_A | 2.624029 | 0.034123 | 3641791  |
| CR_03460W_A | 2.612259 | 0.01583  | 3643213  |
| C5_00280C_A | 2.609951 | 0.014293 | 3641581  |
| C2_01170C_A | 2.609416 | 0.000515 | 3638860  |
| C1_10960W_A | 2.609307 | 0.044415 | 30515047 |
| C6_01370W_A | 2.609205 | 0.014251 | 3641607  |
| CR_08620C_A | 2.60758  | 0.01821  | 3642110  |
| CR_07840C_A | 2.600881 | 0.005921 | 3647346  |
| C2_04180C_A | 2.598086 | 0.016583 | 3637330  |
| C3_04360W_A | 2.596074 | 0.001614 | 3635276  |
| TOM22       | 2.590949 | 0.029166 | 3647650  |
| SCS7        | 2.579998 | 4.03E-05 | 3641157  |
| SFL2        | 2.577069 | 0.001397 | 3636434  |

|             |          |          |          |
|-------------|----------|----------|----------|
| C2_05220C_A | 2.572491 | 0.000865 | 3643466  |
| C1_12170C_A | 2.571501 | 0.009278 | 3642039  |
| C2_05590C_A | 2.57077  | 0.016316 | 3645564  |
| C1_11920W_A | 2.566909 | 0.006677 | 3642003  |
| ERG25       | 2.565365 | 0.000344 | 3644933  |
| LPT1        | 2.564791 | 0.000389 | 3645212  |
| MED1        | 2.564175 | 0.015345 | 3637418  |
| NUO2        | 2.563732 | 9.03E-05 | 3638381  |
| GLR1        | 2.561933 | 7.98E-05 | 3647061  |
| C2_02930C_A | 2.561117 | 0.000435 | 3643015  |
| C1_01910W_A | 2.559948 | 0.001248 | 3645425  |
| RPL25       | 2.559255 | 0.001503 | 30515338 |
| C1_06390W_A | 2.559192 | 0.007908 | 3639558  |
| C5_03170C_A | 2.552954 | 0.000731 | 3637801  |
| C2_05570C_A | 2.551334 | 0.005247 | 3645562  |
| VTC3        | 2.549657 | 0.000593 | 3643206  |
| MCM3        | 2.543419 | 0.002108 | 3645223  |
| CR_07780W_A | 2.542792 | 0.002342 | 3647352  |
| PEX22       | 2.539973 | 0.017901 | 3648103  |
| LYS21       | 2.531917 | 0.000728 | 3644763  |
| SUA72       | 2.526073 | 0.046853 | 3648239  |
| C1_05390C_A | 2.525371 | 0.00225  | 3642479  |
| C3_06710W_A | 2.524599 | 0.000134 | 3638448  |
| ATC1        | 2.518503 | 0.000405 | 3639570  |
| C1_10410W_A | 2.517322 | 0.047045 | 3634840  |
| CHS7        | 2.516274 | 0.004137 | 3639869  |
| PTC7        | 2.511841 | 0.001247 | 3645000  |
| C7_00140C_A | 2.506561 | 0.00807  | 3637974  |
| PIN3        | 2.505557 | 0.000956 | 3635228  |
| ACP1        | 2.504566 | 0.001703 | 3639825  |
| C2_02870W_A | 2.502333 | 0.018755 | 3642972  |
| C5_00580W_A | 2.499878 | 0.002591 | 3641588  |
| C5_03140C_A | 2.498709 | 0.000398 | 3637798  |
| C2_04370W_A | 2.496773 | 0.003714 | 3645460  |
| RPL2        | 2.495987 | 3.99E-05 | 30515049 |
| CR_10510W_A | 2.495146 | 0.003628 | 3639039  |
| DSE1        | 2.494375 | 0.019992 | 3643899  |
| C2_08160C_A | 2.493832 | 0.002623 | 30515152 |
| CHC1        | 2.49139  | 0.000201 | 3647552  |
| ILV1        | 2.489388 | 0.001137 | 3646918  |
| C1_01400C_A | 2.486957 | 6.54E-05 | 3640237  |
| C1_11140W_A | 2.485571 | 0.003858 | 3644410  |
| ACH1        | 2.485312 | 4.01E-05 | 3643773  |
| POB3        | 2.484864 | 0.00042  | 3635827  |
| C3_05010C_A | 2.476196 | 0.038558 | 3635169  |
| MSK1        | 2.469393 | 0.036482 | 3637032  |
| RPT4        | 2.467398 | 7.83E-05 | 3640966  |

|             |          |          |          |
|-------------|----------|----------|----------|
| C2_09930W_A | 2.466473 | 0.010157 | 3643824  |
| PRO2        | 2.465428 | 0.004696 | 3638532  |
| C2_08270C_A | 2.463594 | 0.005256 | 3642347  |
| RIM20       | 2.462843 | 0.000268 | 3634809  |
| NIT3        | 2.462803 | 0.022502 | 3644408  |
| RPD31       | 2.462458 | 0.000771 | 3638520  |
| C1_12920C_A | 2.458148 | 0.01943  | 3636155  |
| YKT6        | 2.444545 | 0.001581 | 3636863  |
| C5_02230W_A | 2.443795 | 0.000498 | 3637708  |
| CR_06620W_A | 2.443206 | 0.010172 | 3646631  |
| CSH3        | 2.442569 | 0.000222 | 3646798  |
| CR_02410W_A | 2.441737 | 0.03166  | 3644928  |
| CR_07600W_A | 2.440148 | 0.020838 | 3644849  |
| YHM2        | 2.437793 | 0.003629 | 3647137  |
| C7_01230C_A | 2.437581 | 0.000587 | 3645906  |
| HSP12       | 2.43094  | 0.000912 | 3643745  |
| RPP2B       | 2.429587 | 0.000168 | 3635195  |
| C7_03840W_A | 2.428736 | 0.027511 | 3643146  |
| UBP13       | 2.426522 | 0.000236 | 3638879  |
| CMK1        | 2.426102 | 0.000272 | 3635263  |
| C6_04110W_A | 2.423632 | 0.000739 | 3647834  |
| ECI1        | 2.422104 | 0.018819 | 3642128  |
| INO4        | 2.419527 | 0.027364 | 30515105 |
| RPN1        | 2.411282 | 0.000511 | 3636147  |
| HGT5        | 2.401246 | 0.003331 | 3635201  |
| MED18       | 2.400733 | 0.049199 | 3644103  |
| C7_00790W_A | 2.39856  | 0.003341 | 3637943  |
| SAM4        | 2.398363 | 0.000909 | 3646506  |
| GLK4        | 2.396707 | 0.001337 | 3646046  |
| SGO1        | 2.39125  | 0.008654 | 3643464  |
| CTF18       | 2.387685 | 0.013927 | 3640431  |
| VPS41       | 2.384932 | 0.003325 | 3634800  |
| C3_07110W_A | 2.384887 | 0.00961  | 3638442  |
| COQ4        | 2.381901 | 0.001677 | 3636804  |
| C1_07630W_A | 2.379148 | 0.026192 | 3646660  |
| RPL32       | 2.378613 | 0.003896 | 30515335 |
| PRE10       | 2.378327 | 0.000632 | 3636957  |
| HOL4        | 2.378048 | 6.02E-05 | 3645409  |
| YHB5        | 2.369613 | 0.000115 | 3647343  |
| C5_02110W_A | 2.364479 | 0.001542 | 3637732  |
| AGE1        | 2.362393 | 0.000298 | 3636913  |
| C7_02170C_A | 2.351464 | 0.005198 | 3636993  |
| CR_03600C_A | 2.34886  | 0.00343  | 3643207  |
| C6_00240C_A | 2.346139 | 0.011757 | 3646062  |
| PUP1        | 2.343463 | 0.000137 | 3638936  |
| C7_02780W_A | 2.343254 | 0.000353 | 3641361  |
| RDH54       | 2.342878 | 0.009406 | 3641231  |

|             |          |          |          |
|-------------|----------|----------|----------|
| C4_01020C_A | 2.340679 | 0.001042 | 3635606  |
| C6_03880W_A | 2.336707 | 0.003035 | 3640293  |
| C4_04390W_A | 2.334961 | 0.001583 | 30515267 |
| C1_05630C_A | 2.334283 | 0.000431 | 3639840  |
| C1_11850W_A | 2.333318 | 0.000712 | 3642010  |
| DBP5        | 2.333087 | 0.001373 | 3636564  |
| PTC4        | 2.332488 | 0.0015   | 3646697  |
| HOM2        | 2.32795  | 0.000148 | 3635826  |
| C5_02370C_A | 2.324328 | 0.002188 | 3637793  |
| CYB2        | 2.324193 | 0.034865 | 3636213  |
| PUP3        | 2.324126 | 0.003602 | 3646718  |
| C1_02240W_A | 2.319475 | 0.000392 | 3644597  |
| C2_09710C_A | 2.315139 | 0.00156  | 3643786  |
| MNN15       | 2.3131   | 0.024579 | 3644794  |
| HDA1        | 2.310977 | 0.002697 | 3640154  |
| SPE2        | 2.307059 | 0.001889 | 3644116  |
| C2_10670W_A | 2.306931 | 0.000689 | 3641251  |
| SER2        | 2.306184 | 0.049284 | 3643006  |
| PEX7        | 2.304115 | 0.008142 | 3644027  |
| PCT1        | 2.303441 | 0.000584 | 3645743  |
| ARC1        | 2.30298  | 0.00019  | 3645108  |
| RLM1        | 2.30115  | 0.000288 | 3635703  |
| C6_02280W_A | 2.285278 | 0.027728 | 3645872  |
| SWI4        | 2.284292 | 0.008701 | 3645408  |
| C5_02750C_A | 2.283327 | 0.005974 | 3637740  |
| RPS5        | 2.276601 | 0.001567 | 3637700  |
| ASC1        | 2.276038 | 0.000262 | 3645907  |
| GCV1        | 2.273756 | 0.02521  | 3639172  |
| GCV3        | 2.272909 | 0.001542 | 3636194  |
| HEM15       | 2.270561 | 0.001424 | 3645211  |
| RPS20       | 2.269391 | 0.003339 | 3642071  |
| SEN1        | 2.267907 | 0.000601 | 3635255  |
| C3_05110W_A | 2.263926 | 0.028372 | 3635158  |
| C2_10630W_A | 2.263503 | 0.016078 | 3641248  |
| DAO1        | 2.262264 | 0.0156   | 3636885  |
| C6_00850W_A | 2.262148 | 0.000279 | 3644010  |
| GRP2        | 2.261674 | 0.001569 | 3637744  |
| ARF2        | 2.261585 | 0.000485 | 3635271  |
| THR4        | 2.257211 | 0.003701 | 3637711  |
| C1_11890W_A | 2.256902 | 0.011789 | 3642006  |
| GRE2        | 2.256614 | 0.003946 | 3648026  |
| ECM4        | 2.254606 | 0.000912 | 3640144  |
| C2_01900C_A | 2.247261 | 0.004663 | 3635789  |
| MLT1        | 2.247027 | 0.000439 | 3640748  |
| VPS33       | 2.243813 | 0.011242 | 3647477  |
| GLG2        | 2.242792 | 0.006154 | 3642282  |
| C2_04300C_A | 2.241037 | 0.03533  | 3648276  |

|             |          |          |          |
|-------------|----------|----------|----------|
| UGA33       | 2.237842 | 0.004084 | 3641886  |
| C4_03920W_A | 2.237674 | 0.02982  | 3648314  |
| CSH1        | 2.237003 | 0.01489  | 3646427  |
| YCS4        | 2.235993 | 0.002631 | 3645196  |
| C4_01780C_A | 2.232991 | 0.034721 | 3635582  |
| ILV2        | 2.230106 | 0.001064 | 3636552  |
| RPL16A      | 2.22983  | 0.000985 | 3639338  |
| RPS21B      | 2.224497 | 0.006442 | 30514961 |
| MIR1        | 2.222856 | 0.000496 | 3634782  |
| ADE17       | 2.21842  | 0.000547 | 3641024  |
| C2_05580W_A | 2.218123 | 0.002263 | 3645563  |
| C7_02850W_A | 2.216972 | 0.00097  | 3641399  |
| MID1        | 2.214746 | 0.018647 | 3647441  |
| MNN9        | 2.210706 | 0.004565 | 3641735  |
| C3_01890C_A | 2.210364 | 0.001948 | 3636561  |
| KEL1        | 2.209017 | 0.001064 | 3639318  |
| DDI1        | 2.208667 | 0.001618 | 3643295  |
| CDC53       | 2.208175 | 0.000876 | 3636603  |
| C1_07050C_A | 2.192332 | 0.016643 | 3639532  |
| PEP3        | 2.190301 | 0.030587 | 3639267  |
| C2_07810W_A | 2.186693 | 0.017027 | 3642324  |
| C2_03900C_A | 2.184338 | 0.000975 | 3637395  |
| C1_14200W_A | 2.183345 | 0.005967 | 3643301  |
| CR_01820W_A | 2.183318 | 0.009224 | 3640164  |
| ADE2        | 2.180647 | 0.001993 | 3635259  |
| C2_01390W_A | 2.173298 | 0.000943 | 3635726  |
| PGI1        | 2.16396  | 0.000253 | 3644847  |
| C1_14500C_A | 2.163607 | 0.002431 | 3643331  |
| C3_01280W_A | 2.162156 | 0.031353 | 3636623  |
| SOD2        | 2.15952  | 0.013569 | 3640231  |
| FGR24       | 2.158232 | 0.015989 | 3643288  |
| C4_03200C_A | 2.157106 | 0.001255 | 3637837  |
| RPL4B       | 2.154285 | 0.000201 | 3643347  |
| C2_00510W_A | 2.153732 | 0.019495 | 3638868  |
| C5_02500C_A | 2.149203 | 0.007391 | 3637766  |
| C7_00250C_A | 2.145986 | 0.008064 | 3637979  |
| C1_14040W_A | 2.134937 | 0.009529 | 3643342  |
| C1_12830C_A | 2.134601 | 0.004412 | 3636176  |
| GBP2        | 2.134057 | 0.000742 | 3637992  |
| RPS4A       | 2.133759 | 0.002325 | 3641247  |
| C3_07740W_A | 2.133236 | 0.000535 | 3638453  |
| SES1        | 2.128659 | 0.000715 | 3638415  |
| CR_00470W_A | 2.126784 | 0.002194 | 3639725  |
| C3_05150W_A | 2.122899 | 0.004512 | 3635162  |
| CHS5        | 2.122824 | 0.001524 | 3637333  |
| SMP2        | 2.122237 | 0.002204 | 3635779  |
| CR_09510C_A | 2.114186 | 0.02503  | 3647105  |



|             |          |          |          |
|-------------|----------|----------|----------|
| NPL3        | 2.112673 | 0.002527 | 3643310  |
| VPS52       | 2.112258 | 0.040983 | 3638996  |
| RPS18       | 2.10663  | 0.01392  | 3637953  |
| RPL15A      | 2.104016 | 0.001179 | 3641025  |
| CR_01380W_A | 2.103317 | 0.02693  | 3640131  |
| YPD1        | 2.103105 | 0.025762 | 3644458  |
| CR_10500C_A | 2.101881 | 0.025328 | 3638982  |
| CR_03860C_A | 2.100401 | 0.01296  | 3643186  |
| HSP90       | 2.099427 | 0.00602  | 3636951  |
| GPH1        | 2.096849 | 0.000156 | 3637956  |
| COX8        | 2.096659 | 0.002678 | 30515130 |
| PGM2        | 2.090814 | 0.000717 | 3642562  |
| C1_07690C_A | 2.089107 | 0.007608 | 3641767  |
| C2_06320W_A | 2.088    | 0.001134 | 3646927  |
| SCT2        | 2.085331 | 0.005865 | 3643018  |
| C7_03370C_A | 2.079434 | 0.005493 | 3646720  |
| C3_01800C_A | 2.078923 | 0.006052 | 3636586  |
| GDI1        | 2.077942 | 0.004185 | 3643298  |
| PKH2        | 2.073131 | 0.002521 | 3642058  |
| CST20       | 2.069377 | 0.012516 | 3637790  |
| DNA2        | 2.066355 | 0.049789 | 3646072  |
| C3_02160C_A | 2.06622  | 0.00317  | 3636654  |
| MDG1        | 2.065716 | 0.001286 | 3643311  |
| C1_06970C_A | 2.065692 | 0.001105 | 3639567  |
| KIN2        | 2.0656   | 0.001612 | 3639697  |
| VTI1        | 2.060041 | 0.008709 | 3638352  |
| C4_04760C_A | 2.059297 | 0.008168 | 3641118  |
| AKR1        | 2.058658 | 0.005363 | 3636166  |
| C3_03760W_A | 2.05752  | 0.020077 | 3645638  |
| UTR2        | 2.057026 | 0.001635 | 3636591  |
| VPS16       | 2.053627 | 0.008484 | 3646150  |
| HHT1        | 2.053466 | 0.000866 | 3638444  |
| UBP6        | 2.051364 | 0.001286 | 3639317  |
| CDC14       | 2.050233 | 0.004303 | 3647132  |
| C1_08490W_A | 2.049351 | 0.013198 | 3646492  |
| C5_03490C_A | 2.048484 | 0.003001 | 3646967  |
| TIF         | 2.044246 | 0.002497 | 3640190  |
| C1_00310W_A | 2.04236  | 0.004939 | 3639298  |
| RPL14       | 2.041693 | 0.005521 | 30515072 |
| C7_02560W_A | 2.03522  | 0.01636  | 3637016  |
| C6_03470W_A | 2.033594 | 0.024092 | 3640253  |
| C5_01540W_A | 2.032604 | 0.007835 | 30515301 |
| PGA7        | 2.031765 | 0.002539 | 3645006  |
| CTA1        | 2.030984 | 0.023684 | 3641631  |
| ARO8        | 2.030285 | 0.0032   | 3638828  |
| C2_00690W_A | 2.028954 | 0.039822 | 3638885  |
| RPN3        | 2.028714 | 0.001057 | 3636917  |

|             |          |          |          |
|-------------|----------|----------|----------|
| KRS1        | 2.027438 | 0.001617 | 3638486  |
| C4_06690C_A | 2.017048 | 0.008679 | 30515285 |
| VPS4        | 2.015694 | 0.013975 | 3637703  |
| IFR2        | 2.015642 | 0.005213 | 3645100  |
| C3_06970W_A | 2.01539  | 0.04987  | 3638506  |
| C1_03790C_A | 2.015067 | 0.006434 | 3644682  |
| MAM33       | 2.011465 | 0.030572 | 3643103  |
| LRG1        | 2.010774 | 0.003022 | 3639727  |
| GUS1        | 2.010041 | 0.005733 | 3638029  |
| YPT1        | 2.006835 | 0.006198 | 3636915  |
| CUP1        | 2.00474  | 0.019383 | 30515318 |
| SBP1        | 2.004631 | 0.004459 | 3635280  |
| C5_04960W_A | 2.001783 | 0.004215 | 3636423  |
| CR_08350W_A | 2.000029 | 0.005855 | 3642082  |
| C1_14190C_A | -2.0006  | 9.82E-05 | 3643300  |
| C2_00700W_A | -2.00176 | 0.001374 | 3638884  |
| C6_02690C_A | -2.00637 | 0.012098 | 3639228  |
| FOX2        | -2.00712 | 0.002267 | 3648327  |
| C3_07680W_A | -2.00764 | 8.3E-05  | 3638459  |
| PEX5        | -2.00841 | 0.004237 | 3645026  |
| RER2        | -2.00861 | 0.009963 | 3636399  |
| MUC1        | -2.01067 | 0.002778 | 3645771  |
| CR_02670C_A | -2.01152 | 0.001459 | 3642572  |
| C1_01470W_A | -2.01257 | 0.002083 | 3640241  |
| C3_01150C_A | -2.01374 | 0.0476   | 3648401  |
| OSM1        | -2.01401 | 0.001152 | 3645573  |
| C2_06090W_A | -2.01509 | 0.001164 | 3644097  |
| C3_06050C_A | -2.01599 | 0.030246 | 3641746  |
| C1_00530C_A | -2.01697 | 0.025985 | 3639368  |
| ADE8        | -2.01785 | 0.003258 | 3642999  |
| C1_10910C_A | -2.01883 | 0.006504 | 3644445  |
| C7_01070C_A | -2.0223  | 0.008652 | 3637949  |
| PES1        | -2.02335 | 0.003227 | 3644105  |
| STP2        | -2.02344 | 0.003834 | 3636214  |
| C2_07030C_A | -2.02633 | 0.047503 | 3643498  |
| C2_04280W_A | -2.02784 | 0.007935 | 3637326  |
| CWT1        | -2.03065 | 0.001666 | 3647595  |
| AFT2        | -2.03085 | 0.0107   | 3643511  |
| C2_00940W_A | -2.03712 | 0.001305 | 3638891  |
| EXM2        | -2.0377  | 0.013336 | 3642929  |
| ARG81       | -2.04025 | 0.001116 | 3634775  |
| C6_04550C_A | -2.04144 | 0.000975 | 3645976  |
| NPR1        | -2.04356 | 0.001752 | 3639498  |
| C2_03410W_A | -2.04734 | 5.38E-05 | 3637412  |
| DCP2        | -2.04857 | 0.000569 | 3642069  |
| WSC2        | -2.0493  | 0.001128 | 3639225  |
| ABD1        | -2.0509  | 0.000787 | 3638456  |

|             |          |          |          |
|-------------|----------|----------|----------|
| IFE2        | -2.05128 | 0.000424 | 3648027  |
| CR_07140C_A | -2.05134 | 0.039256 | 3648227  |
| C1_06470W_A | -2.05551 | 0.007697 | 30515007 |
| C2_03830W_A | -2.05828 | 0.013528 | 3637399  |
| CR_07830C_A | -2.05893 | 0.000739 | 3647345  |
| C6_04140C_A | -2.06046 | 0.001501 | 3647970  |
| ARX1        | -2.06077 | 6.55E-05 | 3636811  |
| CCT8        | -2.06321 | 0.000863 | 3639324  |
| C4_01710C_A | -2.06324 | 0.002413 | 3635708  |
| PIF1        | -2.069   | 0.006748 | 3646054  |
| SPT14       | -2.07245 | 0.001691 | 3641019  |
| ESA1        | -2.07274 | 4.87E-05 | 3640518  |
| C5_01140C_A | -2.07426 | 0.004835 | 3642663  |
| IMH3        | -2.07546 | 0.001493 | 3646556  |
| STP1        | -2.077   | 0.031624 | 3635152  |
| C2_01680C_A | -2.07743 | 0.00057  | 3635744  |
| C5_00260W_A | -2.07985 | 6.8E-05  | 3641561  |
| MRPS9       | -2.08157 | 0.000601 | 3642064  |
| C1_10230C_A | -2.08398 | 0.000261 | 3634880  |
| C2_10600W_A | -2.08499 | 0.007733 | 3641245  |
| CR_03070W_A | -2.08585 | 0.001315 | 3645105  |
| C1_06530C_A | -2.08677 | 0.000335 | 3639521  |
| C2_03150C_A | -2.08741 | 0.024398 | 3642990  |
| KCH1        | -2.09038 | 0.048327 | 3636988  |
| RHR2        | -2.09192 | 0.003438 | 3640522  |
| CCC2        | -2.09735 | 0.000667 | 3637821  |
| C2_01070W_A | -2.09781 | 0.005697 | 3638834  |
| MAS2        | -2.09877 | 0.013214 | 3647249  |
| C1_03050W_A | -2.10448 | 0.000796 | 3636843  |
| C2_05380W_A | -2.10643 | 0.012084 | 3643432  |
| C1_09850C_A | -2.10793 | 0.001865 | 3634849  |
| BMT5        | -2.10794 | 0.000209 | 3635781  |
| C1_01820C_A | -2.10838 | 0.013977 | 3645435  |
| C2_07760W_A | -2.11295 | 0.008593 | 3642298  |
| C4_02700W_A | -2.11319 | 0.010426 | 3637859  |
| FEN1        | -2.11321 | 0.00443  | 3646829  |
| CR_03740C_A | -2.11493 | 0.021986 | 3643176  |
| CR_00370W_A | -2.11619 | 0.000472 | 3639684  |
| SBA1        | -2.11726 | 0.001795 | 3640305  |
| SEF1        | -2.11993 | 0.000542 | 3644945  |
| ECM3        | -2.12136 | 0.01418  | 3635754  |
| C2_04100W_A | -2.13037 | 0.025818 | 3637379  |
| C4_05400C_A | -2.13192 | 0.006226 | 3646952  |
| C4_05010W_A | -2.13253 | 0.015604 | 3641148  |
| AFL1        | -2.13573 | 9.69E-06 | 3641594  |
| CR_00630W_A | -2.13692 | 0.003581 | 3639690  |
| CR_09460C_A | -2.13978 | 0.000294 | 30515453 |

|             |          |          |          |
|-------------|----------|----------|----------|
| BAT21       | -2.13987 | 0.011843 | 3637356  |
| REP1        | -2.1429  | 0.030268 | 3639708  |
| C1_13560W_A | -2.14312 | 0.015608 | 3636174  |
| CR_02910W_A | -2.14599 | 0.000315 | 3642586  |
| C3_07940W_A | -2.14635 | 0.001218 | 3647453  |
| CR_04580W_A | -2.14756 | 0.011003 | 3640948  |
| SLM2        | -2.14836 | 0.001484 | 3647559  |
| GPM2        | -2.1491  | 0.00029  | 3644713  |
| C1_06770W_A | -2.15057 | 0.003025 | 3639504  |
| PWP1        | -2.15086 | 0.001998 | 3635623  |
| C7_01400C_A | -2.15096 | 0.010423 | 3645893  |
| C6_02430W_A | -2.15201 | 0.013185 | 3639163  |
| C6_01420C_A | -2.15211 | 0.019227 | 3641602  |
| C2_07060W_A | -2.15376 | 0.001434 | 3643500  |
| SPT7        | -2.15598 | 0.000161 | 3638928  |
| C1_02900C_A | -2.16019 | 0.008965 | 3636869  |
| C2_06200C_A | -2.16044 | 0.012418 | 3646908  |
| C2_08950W_A | -2.16258 | 0.000223 | 3645788  |
| MST1        | -2.16386 | 0.009184 | 3636831  |
| SUI3        | -2.16431 | 0.001169 | 3643130  |
| SEC2        | -2.16493 | 0.000204 | 3636119  |
| STF2        | -2.16935 | 9.41E-05 | 30515083 |
| C7_01720W_A | -2.16963 | 0.00497  | 3637011  |
| FCA1        | -2.17284 | 0.004225 | 30515327 |
| MBP1        | -2.1756  | 0.000261 | 3635281  |
| ROT1        | -2.17584 | 0.026327 | 3639350  |
| C4_03750C_A | -2.18036 | 0.040586 | 3645356  |
| MRP7        | -2.18076 | 0.022231 | 3643118  |
| RLI1        | -2.18108 | 0.0002   | 3636888  |
| ROD1        | -2.18292 | 0.00039  | 3635763  |
| C4_01970W_A | -2.18339 | 0.000916 | 3635663  |
| PRP39       | -2.18351 | 0.035655 | 3635832  |
| C5_05130C_A | -2.18388 | 0.040081 | 3636459  |
| BOI2        | -2.18431 | 0.000202 | 3640404  |
| C6_04450W_A | -2.18571 | 0.01354  | 3645982  |
| C1_04960C_A | -2.19216 | 0.001444 | 3647527  |
| C1_11770C_A | -2.1924  | 0.00016  | 3645327  |
| NMD5        | -2.19303 | 0.000365 | 3645745  |
| C1_09840C_A | -2.19972 | 4.58E-05 | 3634848  |
| C5_03040W_A | -2.20713 | 0.024212 | 3637824  |
| PPT1        | -2.20987 | 0.008995 | 3636602  |
| C7_01280C_A | -2.21075 | 0.007242 | 3645909  |
| LPI9        | -2.21107 | 0.001333 | 3637060  |
| SMC6        | -2.21136 | 6.36E-05 | 3637039  |
| C1_00030C_A | -2.21704 | 0.015928 | 3639373  |
| CR_04370W_A | -2.21844 | 0.011539 | 3641004  |
| MLP1        | -2.22041 | 0.000365 | 3635688  |

|             |          |          |         |
|-------------|----------|----------|---------|
| ATO6        | -2.22336 | 0.040125 | 3643664 |
| CR_05440W_A | -2.22486 | 0.000986 | 3648245 |
| SOG2        | -2.2249  | 5.88E-05 | 3644475 |
| C2_06570C_A | -2.22525 | 0.003197 | 3646561 |
| KRE30       | -2.2304  | 7.55E-05 | 3642311 |
| C2_07520C_A | -2.23385 | 0.006155 | 3645207 |
| GCD7        | -2.2384  | 0.000481 | 3637367 |
| C7_04140C_A | -2.24192 | 0.009412 | 3643129 |
| C5_05140W_A | -2.24574 | 0.013358 | 3636460 |
| MED3        | -2.24624 | 0.005672 | 3646522 |
| C2_00190C_A | -2.25279 | 9.2E-06  | 3638904 |
| C2_10850C_A | -2.25417 | 0.000105 | 3641232 |
| MDN1        | -2.25494 | 3.41E-05 | 3635614 |
| C1_12610W_A | -2.25538 | 0.006319 | 3646825 |
| C5_03640W_A | -2.2583  | 0.002551 | 3646984 |
| CR_04140W_A | -2.25909 | 0.00019  | 3640974 |
| MSW1        | -2.25944 | 0.020875 | 3637743 |
| C1_12950W_A | -2.26331 | 0.001806 | 3636157 |
| C1_04370C_A | -2.26379 | 0.004077 | 3647994 |
| VPS24       | -2.26379 | 0.000191 | 3638892 |
| C4_02690W_A | -2.26899 | 8.23E-05 | 3637861 |
| CR_04820W_A | -2.27031 | 7.16E-05 | 3647298 |
| GYP5        | -2.27177 | 0.000141 | 3641246 |
| C1_04120C_A | -2.27358 | 0.02437  | 3644701 |
| CR_10040W_A | -2.2792  | 0.016626 | 3639034 |
| DUR4        | -2.28221 | 0.045985 | 3645012 |
| C5_02730C_A | -2.28289 | 0.012091 | 3637738 |
| LEU5        | -2.28469 | 7.16E-05 | 3638838 |
| C6_04290W_A | -2.28879 | 5.73E-05 | 3646280 |
| C5_03560W_A | -2.29065 | 0.00724  | 3646975 |
| GCA1        | -2.29089 | 0.003454 | 3634903 |
| ZCF21       | -2.29225 | 6.34E-06 | 3645762 |
| HGT18       | -2.29417 | 0.011632 | 3645111 |
| CCW14       | -2.29531 | 0.042273 | 3642650 |
| C2_00810C_A | -2.29585 | 0.015227 | 3638810 |
| OPT7        | -2.29595 | 0.029924 | 3645008 |
| C2_00170C_A | -2.2989  | 0.001676 | 3638906 |
| PAM16       | -2.29936 | 0.001768 | 3643321 |
| GRX3        | -2.30227 | 3.24E-05 | 3637858 |
| ASR2        | -2.30799 | 0.002484 | 3641907 |
| HN3         | -2.31233 | 0.046693 | 3640093 |
| C4_01930C_A | -2.3149  | 0.00773  | 3635634 |
| C2_02770W_A | -2.31757 | 5.45E-05 | 3643031 |
| CR_07160C_A | -2.31999 | 0.006067 | 3648347 |
| CR_03870W_A | -2.32177 | 0.016402 | 3643187 |
| FGR27       | -2.32844 | 0.000339 | 3646988 |
| C6_02460C_A | -2.33078 | 0.005189 | 3639168 |

|             |          |          |          |
|-------------|----------|----------|----------|
| CR_03260W_A | -2.33351 | 0.000301 | 30515389 |
| SLN1        | -2.33617 | 1.1E-05  | 3640422  |
| C1_13430C_A | -2.33876 | 0.012814 | 3636223  |
| C3_01130C_A | -2.33882 | 0.000494 | 3639901  |
| NMA111      | -2.34628 | 0.000295 | 3640179  |
| CTN3        | -2.3504  | 0.030132 | 3647396  |
| PDX3        | -2.35078 | 0.000543 | 3640949  |
| C2_00220C_A | -2.35132 | 7.43E-05 | 3638902  |
| SLR1        | -2.35272 | 4.49E-05 | 3643957  |
| SHA3        | -2.35716 | 1.08E-05 | 3644580  |
| CSC25       | -2.35837 | 2.72E-05 | 3645660  |
| SSK1        | -2.36209 | 4.19E-05 | 3636184  |
| C5_03150W_A | -2.36214 | 0.000357 | 3637799  |
| C4_06410W_A | -2.36408 | 0.016392 | 3642796  |
| C4_00080C_A | -2.36618 | 0.007839 | 3648065  |
| RIB1        | -2.36799 | 4.33E-05 | 3642607  |
| ATG15       | -2.36983 | 9.43E-05 | 3641641  |
| PBP2        | -2.37091 | 2.49E-06 | 3640267  |
| MRPL3       | -2.37205 | 0.003602 | 3640722  |
| CTR1        | -2.37375 | 0.002836 | 3647077  |
| C4_04500C_A | -2.37547 | 0.014733 | 3641123  |
| RPC53       | -2.37941 | 0.013043 | 3637898  |
| C6_03370W_A | -2.38168 | 7.12E-05 | 3639230  |
| C6_00980C_A | -2.38233 | 0.001639 | 3644046  |
| SDH1        | -2.38266 | 0.00021  | 3642477  |
| DCK2        | -2.38697 | 0.000948 | 3637384  |
| GAP1        | -2.38777 | 5.59E-05 | 3637806  |
| PRS1        | -2.39192 | 0.001617 | 3635817  |
| HAS1        | -2.39752 | 0.000131 | 3636443  |
| C3_03330C_A | -2.40029 | 0.000622 | 3638364  |
| C4_03780C_A | -2.40062 | 0.00597  | 3645353  |
| HAP41       | -2.4042  | 0.002293 | 3647405  |
| FMT1        | -2.40534 | 0.001362 | 3646530  |
| CKA1        | -2.41022 | 1.5E-05  | 3639018  |
| BUD23       | -2.4139  | 0.035234 | 3642629  |
| SSN6        | -2.41862 | 0.000359 | 3638518  |
| PRP22       | -2.41927 | 0.001295 | 3636404  |
| RIM21       | -2.42098 | 1.64E-05 | 3643739  |
| HAP43       | -2.42103 | 6.83E-06 | 3644531  |
| C3_01520C_A | -2.424   | 0.000299 | 3636570  |
| MRP20       | -2.43005 | 0.00575  | 3640224  |
| C2_05300C_A | -2.43807 | 0.001416 | 3643423  |
| PDR6        | -2.43858 | 0.000148 | 3638824  |
| CNH1        | -2.43992 | 0.000159 | 3648056  |
| C3_07900C_A | -2.44611 | 0.001748 | 3647450  |
| YML6        | -2.44627 | 0.001799 | 3637954  |
| C5_05250C_A | -2.44913 | 0.002199 | 3636472  |

|             |          |          |          |
|-------------|----------|----------|----------|
| RPA135      | -2.45013 | 3.22E-05 | 3637996  |
| C2_09240C_A | -2.45173 | 0.008288 | 3644064  |
| VPS13       | -2.45678 | 9.32E-06 | 3646528  |
| POX1-3      | -2.45691 | 0.000193 | 3636598  |
| C2_01820C_A | -2.45746 | 0.001528 | 3635831  |
| CR_02590C_A | -2.45748 | 0.00385  | 3642595  |
| C7_03680W_A | -2.45923 | 0.021922 | 3646228  |
| CR_07690W_A | -2.4654  | 0.037213 | 3648194  |
| C2_07410W_A | -2.46559 | 0.001553 | 3645203  |
| PHO4        | -2.46947 | 0.00017  | 3641817  |
| C6_02940C_A | -2.47764 | 0.002871 | 3639187  |
| C5_04180W_A | -2.47811 | 0.005273 | 3636544  |
| SPL1        | -2.48025 | 6.36E-05 | 3638035  |
| PRB1        | -2.48334 | 0.000157 | 3643521  |
| C3_01090W_A | -2.48795 | 0.007716 | 30515176 |
| C7_01590C_A | -2.48839 | 0.025682 | 3637037  |
| LPG20       | -2.49498 | 0.003008 | 3644780  |
| C2_05400W_A | -2.49525 | 0.045099 | 3643435  |
| C6_00700C_A | -2.50114 | 0.000452 | 3647074  |
| C6_01000C_A | -2.50266 | 0.011834 | 3644048  |
| YVH1        | -2.50918 | 0.005715 | 3643218  |
| GAP5        | -2.51953 | 4.09E-07 | 3646954  |
| C4_00880W_A | -2.52065 | 0.003467 | 3635681  |
| CEF1        | -2.52174 | 1.24E-05 | 3634808  |
| C4_07060W_A | -2.52182 | 3.8E-06  | 3642908  |
| PUT2        | -2.52724 | 0.000263 | 3636439  |
| CR_04170W_A | -2.5277  | 4.35E-05 | 3640977  |
| C3_00300W_A | -2.53273 | 3.55E-05 | 3640524  |
| CR_09100C_A | -2.5344  | 0.009527 | 3641928  |
| C1_09540W_A | -2.53927 | 0.000561 | 3634885  |
| YTM1        | -2.5469  | 0.006171 | 3634765  |
| C1_11200W_A | -2.54818 | 0.000217 | 3644396  |
| C1_05200C_A | -2.55119 | 0.000191 | 3642466  |
| C3_07920W_A | -2.55423 | 5.34E-06 | 30515226 |
| MIT1        | -2.55658 | 3.01E-05 | 3644089  |
| C6_02150C_A | -2.55794 | 0.00729  | 3645888  |
| C4_00610W_A | -2.56808 | 0.000177 | 3645770  |
| C4_02880C_A | -2.56814 | 0.007687 | 3637907  |
| C4_05740C_A | -2.57721 | 2.85E-07 | 3641806  |
| BGL22       | -2.57908 | 0.001818 | 3641935  |
| CWC22       | -2.57973 | 0.013138 | 3643938  |
| C3_02900W_A | -2.58114 | 0.001476 | 3638337  |
| DAL81       | -2.58307 | 0.00086  | 3640419  |
| RMT2        | -2.5848  | 0.00212  | 3641569  |
| HEM1        | -2.58731 | 8.1E-07  | 3640149  |
| SSU72       | -2.59472 | 0.000376 | 3645129  |
| ALK2        | -2.60234 | 0.015307 | 3639700  |

|             |          |          |          |
|-------------|----------|----------|----------|
| C5_00030W_A | -2.60423 | 0.00018  | 3647879  |
| C1_09130W_A | -2.60891 | 6.99E-05 | 3634943  |
| MNN22       | -2.61196 | 0.00014  | 3641117  |
| CR_08400C_A | -2.61531 | 0.000565 | 3642115  |
| RAT1        | -2.61768 | 1.28E-06 | 3635686  |
| ERO1        | -2.62098 | 7.37E-07 | 3634810  |
| CDR11       | -2.6214  | 5.18E-05 | 3647389  |
| SIT1        | -2.62747 | 4.84E-05 | 3642307  |
| C2_10050W_A | -2.62777 | 4.95E-06 | 3643949  |
| C3_04940W_A | -2.62984 | 4.87E-06 | 3635270  |
| DFG16       | -2.63019 | 9.59E-07 | 3637413  |
| C1_06510C_A | -2.63463 | 1.32E-05 | 3639549  |
| C4_00060W_A | -2.63847 | 0.000481 | 3648061  |
| C2_00540W_A | -2.63994 | 2.27E-08 | 3638865  |
| ECM17       | -2.64122 | 6.69E-09 | 3644077  |
| C3_07590W_A | -2.64174 | 0.025622 | 3638496  |
| NAG6        | -2.64279 | 0.000119 | 3645961  |
| CR_00820C_A | -2.64782 | 0.001242 | 3640413  |
| UGT51C1     | -2.6519  | 4.2E-06  | 3640147  |
| C6_00550W_A | -2.65893 | 2.64E-05 | 3647144  |
| C4_03580W_A | -2.66111 | 0.010453 | 3645369  |
| PGA62       | -2.66113 | 4.61E-06 | 3637879  |
| C4_02110W_A | -2.66172 | 0.001378 | 3635673  |
| C1_09610W_A | -2.66292 | 0.009371 | 3634891  |
| C3_00420W_A | -2.6656  | 0.000682 | 3640553  |
| C3_03310C_A | -2.66658 | 0.021592 | 3638363  |
| C4_07100C_A | -2.66686 | 1.92E-06 | 3642903  |
| CR_10750C_A | -2.67117 | 0.000739 | 3638942  |
| C3_05380W_A | -2.67211 | 0.012597 | 3643679  |
| C3_07390C_A | -2.67578 | 0.002101 | 3638472  |
| CR_07910C_A | -2.67968 | 9.01E-09 | 3644142  |
| REG1        | -2.68863 | 9.73E-06 | 3638858  |
| C6_02380W_A | -2.68914 | 7.45E-06 | 3645883  |
| C4_06420W_A | -2.69157 | 9.22E-06 | 3642795  |
| PEA2        | -2.6981  | 0.001899 | 3647673  |
| C5_04860C_A | -2.69953 | 0.039903 | 3636437  |
| C3_03920W_A | -2.70214 | 0.001729 | 30515197 |
| ARO10       | -2.70372 | 0.000893 | 3647320  |
| CR_00660W_A | -2.71063 | 0.035857 | 3639658  |
| CR_01570W_A | -2.71267 | 0.04185  | 3640077  |
| CR_06060W_A | -2.71576 | 0.000489 | 6335358  |
| WOR4        | -2.71578 | 4.69E-06 | 3638454  |
| NUP49       | -2.72013 | 6.54E-06 | 3636173  |
| C4_03410W_A | -2.72071 | 0.000209 | 3646807  |
| C3_07430W_A | -2.72163 | 1.02E-06 | 3638484  |
| C3_04370C_A | -2.72269 | 0.000457 | 3635172  |
| TOK1        | -2.72855 | 7.54E-06 | 3645754  |



|             |          |          |          |
|-------------|----------|----------|----------|
| C1_05540C_A | -2.73073 | 2.16E-06 | 3642503  |
| FOX3        | -2.73144 | 0.001454 | 3636629  |
| TOR1        | -2.73604 | 8.94E-07 | 3643480  |
| GIR2        | -2.73874 | 0.000605 | 3636962  |
| MNL1        | -2.7392  | 9.33E-06 | 3646050  |
| CIS2        | -2.74035 | 0.001176 | 3639366  |
| MLS1        | -2.74317 | 0.000343 | 3634875  |
| EAF3        | -2.74859 | 0.002409 | 3648318  |
| C3_07660W_A | -2.74912 | 0.000565 | 3638462  |
| C1_08770W_A | -2.75031 | 0.000429 | 3634788  |
| SKN2        | -2.75512 | 0.000838 | 3638309  |
| CR_05150W_A | -2.76536 | 0.0375   | 30515403 |
| C4_07130W_A | -2.76632 | 5.8E-06  | 3642938  |
| SAM35       | -2.76661 | 0.000612 | 3643329  |
| BRF1        | -2.7674  | 7.65E-07 | 3646689  |
| CFL1        | -2.76958 | 0.019449 | 3641810  |
| C1_00540C_A | -2.77144 | 2.69E-05 | 3639367  |
| CRP1        | -2.77342 | 5.02E-06 | 3634826  |
| C1_10710C_A | -2.77479 | 0.01556  | 3644407  |
| SPO72       | -2.77501 | 5.79E-08 | 3644072  |
| C2_00620C_A | -2.77747 | 0.013354 | 3638849  |
| C3_03740W_A | -2.77851 | 0.018526 | 3645640  |
| DRE2        | -2.77909 | 8.09E-10 | 3642571  |
| PUS7        | -2.78042 | 5.21E-05 | 3643960  |
| CR_00750C_A | -2.78285 | 2.86E-05 | 3640438  |
| TPT1        | -2.78836 | 0.000671 | 3640543  |
| LYS144      | -2.79085 | 0.000524 | 3640512  |
| FTH2        | -2.79748 | 0.000439 | 3640401  |
| PWP2        | -2.80511 | 6.35E-07 | 3640416  |
| GPT1        | -2.80538 | 0.023571 | 3647671  |
| PGA41       | -2.8078  | 0.028407 | 3642800  |
| C1_11620W_A | -2.80841 | 0.017507 | 3645344  |
| CR_02460W_A | -2.80904 | 8.48E-06 | 3644922  |
| C3_06420C_A | -2.80956 | 1.18E-05 | 3642262  |
| ALP1        | -2.80977 | 1.81E-06 | 3644437  |
| C3_04540C_A | -2.81012 | 3.55E-05 | 3635262  |
| C1_02960C_A | -2.81486 | 1.74E-07 | 3636834  |
| C1_05210C_A | -2.81496 | 0.000172 | 3642465  |
| FCY21       | -2.81627 | 1.91E-07 | 3643822  |
| C4_04510W_A | -2.81839 | 1.41E-06 | 3641120  |
| C4_01240C_A | -2.81871 | 1.98E-06 | 3635705  |
| C2_03500W_A | -2.82177 | 1.51E-06 | 3637345  |
| BFA1        | -2.82321 | 0.000206 | 3639301  |
| GCV2        | -2.82703 | 2.13E-06 | 3646505  |
| CR_04160C_A | -2.82723 | 0.003193 | 3640976  |
| TIM17       | -2.8312  | 0.000747 | 3647790  |
| CR_08040W_A | -2.83141 | 8.98E-08 | 3644135  |

|             |          |          |          |
|-------------|----------|----------|----------|
| SFT1        | -2.83209 | 0.002423 | 30515372 |
| ZPR1        | -2.8399  | 9.29E-07 | 3640177  |
| C2_01660C_A | -2.84086 | 0.000202 | 3635742  |
| HBR1        | -2.84533 | 7.5E-05  | 3639295  |
| OPT1        | -2.8512  | 0.009125 | 3640150  |
| C6_01080C_A | -2.85294 | 0.038845 | 3644019  |
| MIF2        | -2.85626 | 2.68E-07 | 3639220  |
| MSU1        | -2.86348 | 0.006837 | 3643919  |
| C4_00820W_A | -2.86604 | 0.001467 | 3645741  |
| URK1        | -2.86728 | 6.56E-08 | 3635186  |
| C2_04110W_A | -2.86905 | 0.00999  | 3637378  |
| C4_06210C_A | -2.87111 | 0.000254 | 3642815  |
| C2_10540W_A | -2.87694 | 1.9E-06  | 3641200  |
| OFD1        | -2.87997 | 2.11E-06 | 3646962  |
| ZCF35       | -2.88145 | 0.001461 | 3641740  |
| CR_02890C_A | -2.88305 | 0.000677 | 3642585  |
| C5_00100C_A | -2.88447 | 2.95E-07 | 3647883  |
| C4_04660C_A | -2.8857  | 1.6E-06  | 3641150  |
| BUB3        | -2.8858  | 7.44E-06 | 3646362  |
| DBP2        | -2.88968 | 9.13E-07 | 3647692  |
| C1_10060C_A | -2.89078 | 0.002854 | 3634812  |
| HRR25       | -2.8909  | 1.04E-05 | 3645878  |
| C1_10080W_A | -2.89457 | 0.002575 | 3634814  |
| MAS1        | -2.89463 | 3.81E-07 | 3636855  |
| C5_04170W_A | -2.89543 | 6.03E-08 | 3636543  |
| C3_07100C_A | -2.89926 | 0.000342 | 3638443  |
| C3_00450C_A | -2.89944 | 1.66E-06 | 3640548  |
| AGC1        | -2.89961 | 5.36E-05 | 3636219  |
| C6_04400W_A | -2.90033 | 0.010631 | 3645949  |
| CR_05640C_A | -2.9084  | 0.024304 | 3646690  |
| CPP1        | -2.91497 | 1.04E-06 | 3634865  |
| C3_01540W_A | -2.91933 | 0.034784 | 3636567  |
| TRY2        | -2.9214  | 0.000446 | 3647670  |
| NOC2        | -2.92161 | 0.00023  | 3647596  |
| C5_02740W_A | -2.92463 | 0.00174  | 3637739  |
| CR_00040C_A | -2.92599 | 2.34E-07 | 3639675  |
| CR_09920W_A | -2.93192 | 2.22E-05 | 3639028  |
| CR_08190W_A | -2.93565 | 0.025152 | 3642084  |
| C2_06440C_A | -2.93579 | 0.000563 | 3646565  |
| TIM23       | -2.93744 | 0.000549 | 3643777  |
| C1_08700W_A | -2.94567 | 1.38E-06 | 3634936  |
| HGT8        | -2.9483  | 5.03E-07 | 3638875  |
| C6_01350W_A | -2.94866 | 7.06E-05 | 3641642  |
| CR_09610C_A | -2.95211 | 0.000144 | 3647094  |
| C3_02910W_A | -2.96556 | 0.005375 | 3638378  |
| VPS21       | -2.96846 | 6.5E-07  | 3642092  |
| C2_03950W_A | -2.96934 | 0.000299 | 3637420  |

|             |          |          |          |
|-------------|----------|----------|----------|
| ISU1        | -2.97153 | 1.68E-07 | 3637007  |
| C1_12570C_A | -2.97211 | 6.32E-07 | 3647604  |
| RPA190      | -2.9732  | 2.16E-06 | 3647677  |
| ZCF18       | -2.97548 | 0.000684 | 3641635  |
| C1_11580W_A | -2.97549 | 1.08E-06 | 3645330  |
| C5_00780C_A | -2.97572 | 0.000316 | 3644124  |
| SPT5        | -2.98285 | 1.52E-07 | 3635847  |
| C3_05850W_A | -2.98318 | 0.000196 | 3641758  |
| BAS1        | -2.98515 | 1.04E-07 | 3641136  |
| C3_00500C_A | -2.9854  | 7.52E-05 | 3640515  |
| C2_07920W_A | -2.986   | 0.005559 | 3642294  |
| SET6        | -2.9881  | 0.015182 | 3644590  |
| C3_02980C_A | -2.98836 | 0.000572 | 3638386  |
| MRT4        | -2.98961 | 0.001846 | 3639219  |
| WH11        | -2.99005 | 1.69E-07 | 30515117 |
| C1_14480W_A | -2.99137 | 0.000157 | 3643328  |
| C1_00090W_A | -2.99201 | 0.005596 | 3639304  |
| TRM12       | -2.99421 | 0.000678 | 3641738  |
| C1_06380C_A | -2.99881 | 0.010453 | 3639559  |
| C1_03140W_A | -3.00386 | 1.18E-05 | 3636929  |
| FGR15       | -3.00554 | 0.000437 | 3638882  |
| C1_05370C_A | -3.00687 | 1.14E-06 | 3642481  |
| C7_01150W_A | -3.01074 | 0.000219 | 3645913  |
| CR_03110W_A | -3.01307 | 0.002639 | 3645124  |
| C2_09790W_A | -3.01348 | 0.000115 | 3643804  |
| C3_06820C_A | -3.01515 | 3.43E-08 | 3638544  |
| HST2        | -3.01864 | 0.000832 | 3640162  |
| YTH1        | -3.03011 | 3.26E-08 | 3645572  |
| C2_01370C_A | -3.03847 | 3.14E-07 | 3635723  |
| CR_10420W_A | -3.04154 | 1.87E-06 | 3638974  |
| C2_02300W_A | -3.04259 | 6.89E-05 | 3635808  |
| C3_02920W_A | -3.04447 | 4.58E-08 | 3638379  |
| PRP45       | -3.05319 | 0.010222 | 3639166  |
| URA7        | -3.0579  | 8.14E-08 | 3636510  |
| CR_02950C_A | -3.05805 | 0.000829 | 3642590  |
| CKS1        | -3.05822 | 0.000131 | 3647732  |
| FUR4        | -3.06002 | 0.00163  | 3638305  |
| C1_07980C_A | -3.06021 | 1.35E-07 | 3640696  |
| C3_00340W_A | -3.06384 | 0.003335 | 3640544  |
| C4_04460C_A | -3.06401 | 4.39E-08 | 3641127  |
| NAG1        | -3.06902 | 3.3E-05  | 3645966  |
| RIT1        | -3.07333 | 0.001785 | 3638492  |
| C6_03220W_A | -3.0757  | 0.002332 | 3639179  |
| SET2        | -3.07723 | 2.76E-07 | 3643923  |
| CR_02510W_A | -3.07773 | 1.26E-05 | 3647694  |
| AAF1        | -3.08028 | 3.97E-07 | 3642284  |
| C6_04180W_A | -3.0841  | 7.1E-07  | 3648176  |

|             |          |          |          |
|-------------|----------|----------|----------|
| CR_02800C_A | -3.08475 | 6.06E-07 | 3642559  |
| C7_02460C_A | -3.08924 | 7.22E-07 | 3636946  |
| C1_12370W_A | -3.08986 | 9.89E-05 | 3642061  |
| C1_14580C_A | -3.09174 | 5.42E-08 | 3643290  |
| C3_07490W_A | -3.09197 | 2.4E-12  | 3638528  |
| C2_09820W_A | -3.09321 | 3.45E-06 | 3643801  |
| C1_03400W_A | -3.09536 | 5.47E-06 | 3636904  |
| C1_01890C_A | -3.10138 | 1.35E-06 | 3645427  |
| C1_06540C_A | -3.10391 | 1.09E-05 | 3639520  |
| CR_04750W_A | -3.10449 | 0.028501 | 30515399 |
| GRR1        | -3.11468 | 5.93E-07 | 3636392  |
| C2_07680W_A | -3.11597 | 0.000113 | 3642339  |
| CR_04240C_A | -3.11871 | 3.45E-07 | 3640989  |
| RRP42       | -3.12849 | 0.003647 | 3647852  |
| C7_03000C_A | -3.13437 | 0.000106 | 3641383  |
| FET3        | -3.13576 | 0.000503 | 3647153  |
| CR_03080C_A | -3.13691 | 0.004002 | 3645104  |
| HGH1        | -3.14018 | 0.000973 | 3635647  |
| C2_10170C_A | -3.14859 | 3.23E-08 | 3643931  |
| MRPL27      | -3.15196 | 0.000631 | 3636884  |
| C5_04980W_A | -3.15475 | 0.004243 | 3636536  |
| CR_10060W_A | -3.16805 | 7.68E-07 | 3639035  |
| ALR1        | -3.16813 | 3.15E-08 | 3636616  |
| C3_00160C_A | -3.16856 | 1.06E-07 | 3640591  |
| ARO80       | -3.16927 | 0.000177 | 3636808  |
| UTP13       | -3.17084 | 3.11E-07 | 3637718  |
| C2_03560C_A | -3.1724  | 0.0002   | 3637337  |
| C1_12680W_A | -3.17394 | 1.53E-06 | 3646833  |
| LIG1        | -3.17416 | 7.09E-09 | 3636947  |
| C1_02090C_A | -3.17945 | 0.00095  | 3644577  |
| PTC5        | -3.18205 | 4.3E-07  | 3642072  |
| C2_02420C_A | -3.18512 | 9.79E-06 | 3635756  |
| TPS2        | -3.1885  | 1.29E-08 | 3636892  |
| POP2        | -3.19517 | 1.1E-06  | 3640301  |
| C1_06800W_A | -3.20541 | 0.000348 | 3639496  |
| C1_05250W_A | -3.20646 | 0.030452 | 3642462  |
| SDS24       | -3.20735 | 2.51E-08 | 3640756  |
| CR_08330W_A | -3.20883 | 6.06E-05 | 3642080  |
| DAL5        | -3.21231 | 0.003874 | 3638401  |
| C4_03020W_A | -3.21438 | 3.67E-07 | 3637934  |
| C4_02170C_A | -3.21529 | 0.00779  | 3635667  |
| C1_09650W_A | -3.2169  | 8.06E-08 | 3634870  |
| CDR1        | -3.21727 | 6.27E-09 | 3635237  |
| C1_00520W_A | -3.22065 | 0.000185 | 3639310  |
| C4_04990C_A | -3.22311 | 0.038395 | 3641166  |
| SAP9        | -3.22423 | 1.26E-07 | 3645625  |
| C7_01610W_A | -3.22694 | 0.000319 | 30515353 |

|             |          |          |          |
|-------------|----------|----------|----------|
| CR_10640W_A | -3.22872 | 0.004786 | 3639014  |
| CPA1        | -3.23082 | 1.01E-06 | 3635715  |
| C2_06620W_A | -3.23631 | 0.005905 | 3646564  |
| C2_02540W_A | -3.24208 | 1.72E-07 | 3635820  |
| C4_06680C_A | -3.24251 | 6.06E-10 | 3642950  |
| C2_04770W_A | -3.24935 | 0.000464 | 3647783  |
| C2_09360W_A | -3.25066 | 0.000526 | 3644109  |
| C3_07280C_A | -3.25459 | 0.001167 | 3638431  |
| C3_00940W_A | -3.25488 | 5.26E-08 | 3639851  |
| TCO89       | -3.27219 | 3.62E-08 | 3644788  |
| C5_00820W_A | -3.2744  | 8.03E-05 | 3644128  |
| CR_01440C_A | -3.28134 | 9.32E-07 | 30515374 |
| UTP21       | -3.28257 | 6.21E-07 | 3635757  |
| TRK1        | -3.29799 | 2.38E-09 | 3644153  |
| ARG8        | -3.29948 | 2.1E-06  | 3641131  |
| C7_02160W_A | -3.30324 | 2.61E-05 | 3636994  |
| AGP3        | -3.30811 | 0.004945 | 3641163  |
| C1_01140C_A | -3.30856 | 5.44E-06 | 3640202  |
| C6_00360C_A | -3.31369 | 0.000636 | 3646083  |
| C7_02930C_A | -3.32698 | 2.22E-07 | 3641390  |
| C2_01740C_A | -3.32885 | 0.008087 | 3635733  |
| C2_03570C_A | -3.32946 | 0.003624 | 3637336  |
| PSO2        | -3.33645 | 0.002728 | 3641241  |
| C4_00750C_A | -3.33651 | 0.005582 | 3645763  |
| MRPL37      | -3.33818 | 0.002519 | 3644782  |
| CR_10000C_A | -3.34039 | 0.003832 | 3639030  |
| CR_07670W_A | -3.34257 | 6.91E-05 | 3647255  |
| PRS5        | -3.34868 | 2.79E-07 | 3642296  |
| MDJ1        | -3.35741 | 4.47E-05 | 3646980  |
| CR_05910W_A | -3.35784 | 4.05E-05 | 3646680  |
| HAP2        | -3.35872 | 3.1E-09  | 3641800  |
| CAN2        | -3.36534 | 1.81E-08 | 3644017  |
| GNP3        | -3.37523 | 0.000119 | 3639027  |
| C1_11290W_A | -3.3813  | 0.000303 | 3644553  |
| C1_09740C_A | -3.38261 | 0.019705 | 30515035 |
| MET14       | -3.38418 | 0.015128 | 3641547  |
| YME1        | -3.38429 | 1.53E-07 | 3641816  |
| CR_06680C_A | -3.39304 | 2.43E-06 | 3646623  |
| C2_05080C_A | -3.39566 | 0.015389 | 3643453  |
| C3_03200C_A | -3.3971  | 0.021453 | 3638428  |
| CYM1        | -3.39761 | 4.52E-09 | 3642244  |
| C2_07000W_A | -3.39767 | 1.53E-05 | 3643534  |
| PDE1        | -3.40364 | 0.00026  | 3637713  |
| C1_01630W_A | -3.40579 | 8.1E-10  | 3640194  |
| C1_13330C_A | -3.40658 | 1.16E-07 | 3636150  |
| C7_01660C_A | -3.40669 | 5.24E-06 | 3636983  |
| C3_07700W_A | -3.4121  | 3.38E-05 | 3638457  |

|             |          |          |          |
|-------------|----------|----------|----------|
| C4_06990W_A | -3.41847 | 3.64E-06 | 3642968  |
| CR_03940W_A | -3.42003 | 3.53E-05 | 3648378  |
| C5_00160W_A | -3.42485 | 7.58E-05 | 3647871  |
| C1_08710W_A | -3.4349  | 0.000153 | 3634937  |
| C7_00500W_A | -3.43823 | 0.046069 | 3637987  |
| C2_05270W_A | -3.44184 | 1.75E-08 | 3643470  |
| C1_10580C_A | -3.45184 | 0.00266  | 3647679  |
| CR_10760C_A | -3.45903 | 0.000336 | 3638943  |
| PHHB        | -3.46382 | 1.05E-06 | 3638871  |
| DOT6        | -3.46507 | 1.53E-08 | 3640078  |
| C7_00160C_A | -3.46883 | 8.03E-05 | 3637972  |
| C1_00270W_A | -3.47005 | 2.6E-07  | 3639300  |
| C1_04820C_A | -3.47158 | 0.000283 | 3644787  |
| DAL1        | -3.47391 | 0.000163 | 3640564  |
| C1_05360C_A | -3.48183 | 3.23E-07 | 3642482  |
| C2_05980C_A | -3.48584 | 0.001258 | 3644075  |
| C1_07530W_A | -3.48833 | 0.005174 | 30515025 |
| CDC34       | -3.4938  | 1.53E-08 | 3637028  |
| C4_04820C_A | -3.49961 | 0.00111  | 3641165  |
| C7_01030C_A | -3.50416 | 5.6E-05  | 3638019  |
| BRE1        | -3.50764 | 5.62E-06 | 3641568  |
| C1_09390W_A | -3.5204  | 0.000137 | 3634851  |
| CR_07680C_A | -3.52221 | 0.001925 | 3648193  |
| C1_10120C_A | -3.52267 | 5.75E-14 | 3634779  |
| C3_01770C_A | -3.52273 | 4.04E-05 | 3636588  |
| C5_01050C_A | -3.52294 | 0.000238 | 3642648  |
| RPF2        | -3.52374 | 6.27E-05 | 3643467  |
| RSN1        | -3.5249  | 5.09E-07 | 3638308  |
| MEP2        | -3.52803 | 1.32E-07 | 3645022  |
| DUR32       | -3.53787 | 0.001069 | 3636142  |
| PGA55       | -3.5485  | 1.17E-06 | 3645784  |
| C7_00200W_A | -3.54857 | 6.83E-06 | 3637968  |
| CR_07320C_A | -3.55062 | 1.97E-07 | 3646057  |
| C3_07580W_A | -3.55576 | 2E-06    | 30515225 |
| C5_02680W_A | -3.56812 | 1.44E-10 | 3637774  |
| CR_06450W_A | -3.57528 | 0.000473 | 3645279  |
| CKA2        | -3.57905 | 7.74E-07 | 3643444  |
| RPF1        | -3.58637 | 1.46E-07 | 3637890  |
| OLE2        | -3.60087 | 5.87E-10 | 3643503  |
| CR_03840C_A | -3.60684 | 0.012504 | 3643184  |
| C5_03740W_A | -3.60777 | 4.43E-05 | 3647237  |
| NBN1        | -3.61071 | 7.2E-08  | 3637410  |
| C2_06510W_A | -3.6109  | 1.48E-07 | 3646570  |
| C6_03290W_A | -3.61939 | 5.38E-11 | 3639195  |
| C3_02030W_A | -3.6196  | 7.68E-06 | 3636580  |
| C2_02120W_A | -3.61962 | 6.34E-07 | 3635746  |
| IFR1        | -3.62357 | 0.003172 | 3643930  |

|             |          |          |          |
|-------------|----------|----------|----------|
| C4_07010C_A | -3.6251  | 0.003277 | 3642966  |
| C2_07800W_A | -3.63387 | 0.004003 | 3642325  |
| C5_00130C_A | -3.63415 | 5.33E-09 | 3647881  |
| DAO2        | -3.63914 | 7.34E-05 | 3646797  |
| MTG1        | -3.64097 | 0.000113 | 3645139  |
| C7_03210W_A | -3.64559 | 0.000912 | 3641371  |
| HSP78       | -3.65101 | 5.58E-05 | 3637414  |
| C1_10110W_A | -3.65133 | 0.013686 | 3634778  |
| CUP2        | -3.65227 | 9.13E-09 | 3636189  |
| CR_02930W_A | -3.65285 | 3.43E-11 | 3642588  |
| FLU1        | -3.65555 | 2.02E-05 | 3637048  |
| C2_10740C_A | -3.66019 | 1.02E-09 | 3641236  |
| C3_01850W_A | -3.66116 | 7.69E-05 | 3636565  |
| CR_04600W_A | -3.66168 | 3.09E-09 | 3640950  |
| C4_07170C_A | -3.66538 | 0.001916 | 30515289 |
| TRY3        | -3.67126 | 1.1E-09  | 3642652  |
| C5_02010C_A | -3.68275 | 1.17E-06 | 3643772  |
| RHD1        | -3.68866 | 0.003218 | 3647531  |
| C7_03270W_A | -3.69074 | 3.4E-09  | 3641365  |
| C7_02660C_A | -3.70262 | 0.012346 | 3647652  |
| CR_03250C_A | -3.70312 | 3.99E-07 | 3645102  |
| C1_14350W_A | -3.7087  | 9.28E-11 | 3643281  |
| SWE1        | -3.71786 | 2.57E-13 | 3634866  |
| OYE2        | -3.72008 | 3.35E-07 | 3641603  |
| RTG3        | -3.7219  | 1.06E-09 | 3644423  |
| C2_09510C_A | -3.72288 | 3.27E-09 | 3643816  |
| CR_07480W_A | -3.72318 | 4.24E-10 | 3646047  |
| C5_04050W_A | -3.72738 | 4.4E-14  | 3647735  |
| C2_02110C_A | -3.74446 | 0.000595 | 3635745  |
| RIO2        | -3.76386 | 6.31E-11 | 3642066  |
| C6_01340C_A | -3.76543 | 6.03E-05 | 30515331 |
| C1_00860W_A | -3.76561 | 8.81E-06 | 3639358  |
| C7_01490W_A | -3.77019 | 1.96E-06 | 3637051  |
| IFM3        | -3.78394 | 7.21E-05 | 3642335  |
| CSI2        | -3.78631 | 0.003145 | 3642016  |
| C2_01510C_A | -3.78734 | 0.005004 | 3635801  |
| C2_00200W_A | -3.79168 | 1.42E-08 | 3638903  |
| SSY5        | -3.79664 | 1.79E-10 | 3642140  |
| C6_00640C_A | -3.79783 | 1.86E-05 | 3647134  |
| C1_01220C_A | -3.80158 | 0.000108 | 3640210  |
| CR_02600W_A | -3.81168 | 0.036671 | 3642596  |
| FET31       | -3.81805 | 0.000542 | 3647151  |
| C7_02550C_A | -3.82104 | 9.25E-06 | 3637018  |
| OPY2        | -3.82226 | 1.06E-09 | 3640765  |
| CR_08500W_A | -3.83206 | 2.18E-07 | 3642136  |
| C2_04820W_A | -3.83574 | 1.65E-06 | 3647776  |
| EST1        | -3.83596 | 1.91E-11 | 3636526  |

|             |          |          |          |
|-------------|----------|----------|----------|
| CR_10280W_A | -3.84153 | 0.000179 | 3638934  |
| COX17       | -3.85579 | 0.000294 | 30515088 |
| CR_06840W_A | -3.85686 | 3.28E-10 | 3647322  |
| C1_11900C_A | -3.85963 | 6.73E-06 | 3642005  |
| CR_01370C_A | -3.86115 | 1.38E-07 | 3640168  |
| PFK26       | -3.86328 | 9.68E-10 | 3634912  |
| DAL9        | -3.86351 | 5.62E-05 | 3645653  |
| CR_00670C_A | -3.86733 | 0.001411 | 3639655  |
| MTR2        | -3.87548 | 2.99E-06 | 30515167 |
| TPK1        | -3.87648 | 2.84E-12 | 3634879  |
| C2_07040W_A | -3.87754 | 8.87E-06 | 3643499  |
| SHY1        | -3.87893 | 9.71E-09 | 3634824  |
| FGR23       | -3.88273 | 6.25E-09 | 3636555  |
| FZO1        | -3.88937 | 2.47E-09 | 3646848  |
| PTR3        | -3.88967 | 5.67E-05 | 3645428  |
| C4_03710C_A | -3.89055 | 0.002346 | 3645360  |
| RAD3        | -3.89511 | 1.78E-10 | 3638014  |
| CNT         | -3.90665 | 3.92E-10 | 3644071  |
| MNN4-4      | -3.91297 | 0.000127 | 3639250  |
| SLU7        | -3.91555 | 0.000163 | 3638501  |
| C1_06840C_A | -3.91775 | 3.03E-10 | 30515012 |
| C4_00100C_A | -3.91897 | 1.15E-12 | 3645004  |
| NOT5        | -3.92009 | 1.92E-11 | 3640763  |
| C2_03550C_A | -3.92176 | 8.09E-10 | 3637338  |
| C6_03460W_A | -3.92225 | 4.13E-13 | 3640252  |
| C3_00150W_A | -3.92976 | 1.25E-06 | 3640595  |
| C4_05330C_A | -3.9319  | 4E-05    | 3646959  |
| RRP6        | -3.93569 | 1.78E-08 | 3647535  |
| C2_08850C_A | -3.93847 | 2.43E-10 | 3643890  |
| PRN1        | -3.95014 | 7.92E-05 | 3639882  |
| C1_01580W_A | -3.95144 | 3.8E-06  | 3640222  |
| C3_02420C_A | -3.95825 | 2.65E-05 | 3638342  |
| NEP1        | -3.96498 | 6.07E-07 | 3644545  |
| HOS3        | -3.9755  | 1.04E-11 | 3637886  |
| C3_02180C_A | -3.9802  | 6.04E-05 | 3636643  |
| TPO4        | -3.98167 | 2.38E-05 | 3640956  |
| C3_05250C_A | -3.98372 | 2.75E-08 | 3635199  |
| NOP15       | -3.9916  | 7.59E-05 | 3637966  |
| C3_00620C_A | -3.99372 | 4.36E-08 | 30515171 |
| MSN4        | -3.9978  | 7.79E-11 | 3634911  |
| LEU3        | -4.00099 | 1.43E-10 | 3637757  |
| SNT1        | -4.01767 | 6.33E-10 | 3642033  |
| CR_03160W_A | -4.02485 | 2.31E-05 | 3645117  |
| C5_00800C_A | -4.02957 | 1.73E-09 | 3644126  |
| DEF1        | -4.03037 | 1.73E-12 | 3639023  |
| CTR2        | -4.03561 | 3.97E-14 | 3648427  |
| TOP1        | -4.04305 | 6.53E-10 | 3644034  |



|             |          |          |          |
|-------------|----------|----------|----------|
| ISA2        | -4.04645 | 3.65E-10 | 3638513  |
| C1_11880W_A | -4.05087 | 1.01E-05 | 3642007  |
| MSS51       | -4.0519  | 1.5E-10  | 3639031  |
| C4_06850C_A | -4.06844 | 4.15E-09 | 3642912  |
| CR_09740W_A | -4.07386 | 2.1E-08  | 3639008  |
| C2_00280C_A | -4.07504 | 7.9E-06  | 3638802  |
| CR_03910C_A | -4.07667 | 5.45E-10 | 3640954  |
| IFH1        | -4.08215 | 2.56E-12 | 3637770  |
| C3_05140C_A | -4.08246 | 2.4E-06  | 3635161  |
| C1_09780C_A | -4.0829  | 2.07E-12 | 3634842  |
| C5_01900C_A | -4.0832  | 0.01786  | 30515302 |
| C7_02920W_A | -4.08465 | 0.019899 | 3641391  |
| CEM1        | -4.09753 | 0.000422 | 3635242  |
| C2_01240C_A | -4.10523 | 0.000233 | 3638794  |
| KNS1        | -4.10588 | 4.99E-06 | 3636228  |
| C3_07800C_A | -4.10743 | 0.000159 | 3647461  |
| LIP4        | -4.11653 | 1.81E-07 | 3645987  |
| CR_02970C_A | -4.11662 | 3.09E-13 | 3642603  |
| SDH4        | -4.11916 | 0.001411 | 3636497  |
| C5_01470C_A | -4.14551 | 0.002536 | 3647050  |
| C3_03370C_A | -4.14601 | 2.19E-11 | 3638366  |
| C7_02110W_A | -4.15083 | 3.89E-13 | 3637022  |
| C2_05160C_A | -4.15102 | 4.54E-08 | 3643461  |
| C2_02630W_A | -4.15388 | 1.41E-05 | 3635839  |
| CR_08410W_A | -4.15723 | 1.66E-10 | 3642116  |
| CR_06230W_A | -4.15932 | 8.97E-06 | 3644867  |
| NIP7        | -4.16091 | 8.35E-05 | 3645880  |
| PEL1        | -4.16715 | 5.79E-10 | 3637989  |
| TBF1        | -4.18122 | 7.22E-13 | 3637327  |
| C3_03670W_A | -4.1831  | 3.1E-13  | 3645649  |
| CCS1        | -4.18753 | 3.67E-13 | 3644476  |
| C3_07070C_A | -4.18878 | 7.65E-06 | 3638446  |
| HSK3        | -4.19222 | 2.7E-07  | 3635730  |
| C5_03630C_A | -4.19562 | 0.003107 | 3646983  |
| CR_08940W_A | -4.19859 | 1.29E-05 | 3641914  |
| AUT7        | -4.21796 | 2.11E-12 | 30514999 |
| C5_03030W_A | -4.22115 | 5.83E-05 | 3637822  |
| C6_01780C_A | -4.22551 | 2.24E-05 | 3641636  |
| SLD1        | -4.22876 | 5.46E-13 | 3638406  |
| C5_02020C_A | -4.22956 | 7.82E-12 | 3643771  |
| MLH3        | -4.23247 | 1.65E-08 | 3643294  |
| HAL9        | -4.2379  | 1.75E-12 | 3643757  |
| C5_03460C_A | -4.23879 | 7.49E-05 | 3646345  |
| C2_04080W_A | -4.23993 | 2.14E-13 | 3637381  |
| STB3        | -4.24264 | 1E-09    | 3645781  |
| C6_04300W_A | -4.24534 | 1.34E-07 | 3646286  |
| C3_07670W_A | -4.25032 | 1.98E-10 | 3638460  |

|             |          |          |          |
|-------------|----------|----------|----------|
| C1_10360C_A | -4.25409 | 7.38E-07 | 3634836  |
| DUS4        | -4.26268 | 2.39E-07 | 3641580  |
| C7_02340C_A | -4.27332 | 0.000303 | 3636933  |
| RGA2        | -4.27369 | 2.73E-11 | 3635661  |
| EPL1        | -4.27628 | 1.27E-10 | 3639732  |
| C5_05240C_A | -4.27865 | 0.023031 | 3636471  |
| FGR46       | -4.27932 | 0.02525  | 3638989  |
| ZCF30       | -4.2802  | 9.01E-11 | 3642051  |
| PGA48       | -4.28268 | 4.53E-07 | 3647905  |
| C4_02090C_A | -4.28294 | 2.58E-07 | 3635642  |
| NPR2        | -4.28592 | 9.84E-08 | 3638360  |
| C6_00530C_A | -4.30456 | 0.000466 | 30515326 |
| C1_02380C_A | -4.30649 | 0.007352 | 3636790  |
| C4_01090C_A | -4.31379 | 0.002055 | 3635685  |
| C7_01360C_A | -4.31545 | 0.020177 | 3645900  |
| C2_02820C_A | -4.32885 | 1.7E-07  | 3643027  |
| C7_03400C_A | -4.33008 | 9.98E-10 | 3646717  |
| GAP4        | -4.34032 | 2.61E-09 | 3644463  |
| FCY24       | -4.34062 | 0.000827 | 3641902  |
| ISW2        | -4.34424 | 6.74E-06 | 3642235  |
| C6_01980C_A | -4.34516 | 5.1E-08  | 3644560  |
| C5_01610W_A | -4.34907 | 0.000173 | 3647251  |
| C3_05160C_A | -4.35043 | 5.28E-13 | 3635229  |
| MRV4        | -4.35056 | 0.008222 | 3636547  |
| C2_00650W_A | -4.3613  | 1.49E-09 | 3638889  |
| C7_02120C_A | -4.36482 | 5.77E-05 | 3637019  |
| RIM101      | -4.36615 | 6.63E-10 | 3643280  |
| C3_05860C_A | -4.38909 | 2.85E-06 | 3641759  |
| PUT1        | -4.40477 | 1.99E-14 | 3637779  |
| CR_06970C_A | -4.40788 | 3.06E-06 | 3645736  |
| C2_00840W_A | -4.42293 | 7.08E-05 | 3638807  |
| PUF3        | -4.4299  | 9.02E-08 | 3646950  |
| CR_06290C_A | -4.43729 | 8.6E-09  | 3644856  |
| RLP24       | -4.44472 | 1.91E-05 | 3645748  |
| C4_02850W_A | -4.45963 | 8.66E-12 | 3637910  |
| POP4        | -4.46121 | 3.34E-06 | 3639241  |
| C2_08920W_A | -4.46459 | 1.19E-08 | 3645797  |
| ZCF29       | -4.47939 | 7.69E-12 | 3641370  |
| C6_03390W_A | -4.49078 | 1.66E-06 | 3639232  |
| C1_11570W_A | -4.49354 | 0.003832 | 30515055 |
| C2_06850W_A | -4.49384 | 0.00531  | 30515142 |
| C6_02020C_A | -4.52026 | 1.31E-12 | 3647563  |
| SPB1        | -4.53167 | 7.46E-09 | 3648179  |
| RPD3        | -4.53784 | 8.12E-12 | 3642580  |
| MIS12       | -4.54568 | 3.71E-11 | 3639669  |
| CR_08650C_A | -4.55491 | 6.96E-11 | 3642124  |
| C4_07040W_A | -4.56656 | 0.000607 | 3642963  |

|             |          |          |          |
|-------------|----------|----------|----------|
| C1_09320C_A | -4.57069 | 3.06E-10 | 3634834  |
| C3_03300C_A | -4.58366 | 3.25E-11 | 3638361  |
| HIP1        | -4.5873  | 1.65E-13 | 3643761  |
| C1_13590W_A | -4.59769 | 0.039408 | 3636209  |
| C5_00140C_A | -4.59769 | 0.000145 | 3647873  |
| C6_02350C_A | -4.60268 | 2.45E-06 | 3645881  |
| C1_09040C_A | -4.60322 | 6.71E-06 | 3634769  |
| C2_07580W_A | -4.60501 | 0.000209 | 3645216  |
| C4_03000C_A | -4.61743 | 2.89E-10 | 3637935  |
| FGR13       | -4.61815 | 4.2E-05  | 3648078  |
| UTP8        | -4.62451 | 1.43E-13 | 3640547  |
| CR_10400W_A | -4.6275  | 3.87E-07 | 3638956  |
| C1_05790W_A | -4.64224 | 9.92E-05 | 30515002 |
| C4_07150W_A | -4.65066 | 0.004336 | 3642935  |
| C4_03740W_A | -4.65545 | 3.45E-07 | 3645357  |
| CR_05550C_A | -4.65561 | 9.16E-13 | 3647593  |
| C2_03000C_A | -4.65601 | 6.5E-07  | 3643022  |
| C3_06700C_A | -4.65614 | 1.45E-14 | 3642247  |
| IMP4        | -4.6637  | 4.23E-07 | 3644138  |
| C7_03590C_A | -4.67242 | 7.52E-10 | 3646239  |
| RIX7        | -4.69496 | 2.72E-10 | 3637735  |
| CR_00810W_A | -4.70774 | 2.64E-05 | 3640415  |
| UTP15       | -4.75349 | 9.62E-08 | 3643906  |
| C2_02270C_A | -4.758   | 4.68E-07 | 3635805  |
| C6_04510C_A | -4.76204 | 2.7E-08  | 3645955  |
| DBP3        | -4.76735 | 3.05E-09 | 3634868  |
| C1_04040C_A | -4.76877 | 4.29E-09 | 3646429  |
| SUR2        | -4.76905 | 5.67E-12 | 3642973  |
| YAH1        | -4.77288 | 3.82E-06 | 3638368  |
| C1_03830C_A | -4.77559 | 1.03E-08 | 3644678  |
| WHI3        | -4.79696 | 7.46E-15 | 3636991  |
| CR_03710C_A | -4.7973  | 7.13E-10 | 3643224  |
| BMS1        | -4.80922 | 4.88E-10 | 3639857  |
| IML1        | -4.82052 | 1.82E-17 | 3636813  |
| C7_01170C_A | -4.83502 | 5.06E-06 | 3645914  |
| UTP4        | -4.84101 | 4.6E-08  | 3636657  |
| SSY1        | -4.84806 | 5.69E-12 | 3637382  |
| C4_05360C_A | -4.87325 | 0.018881 | 3646949  |
| C7_03230C_A | -4.87466 | 0.021373 | 3641369  |
| C1_12280C_A | -4.87477 | 0.020068 | 3642019  |
| MNN4        | -4.89016 | 1.33E-09 | 3642784  |
| C5_01430C_A | -4.89065 | 9.62E-08 | 3647056  |
| ATO10       | -4.89697 | 0.0041   | 3640394  |
| CR_03200C_A | -4.90243 | 3.8E-11  | 3645131  |
| C2_05670C_A | -4.9153  | 3.7E-05  | 3645570  |
| C2_08700C_A | -4.91645 | 2.46E-15 | 3643887  |
| C7_04160W_A | -4.92383 | 1.42E-06 | 3643127  |

|             |          |          |          |
|-------------|----------|----------|----------|
| MET3        | -4.9268  | 2.04E-06 | 3636132  |
| RCL1        | -4.92858 | 9.45E-07 | 3645199  |
| HPT1        | -4.92973 | 6.38E-11 | 3643034  |
| OYE23       | -4.93145 | 0.000781 | 3641618  |
| ATG9        | -4.93402 | 1.16E-10 | 3635239  |
| PNC1        | -4.95073 | 7.75E-08 | 3646232  |
| C2_02920W_A | -4.957   | 2.07E-12 | 3643016  |
| ZCF28       | -4.95853 | 6.31E-07 | 3634776  |
| C3_06560W_A | -4.97117 | 1.52E-15 | 3642276  |
| DRS1        | -4.97382 | 4.12E-13 | 3639045  |
| C2_05060C_A | -4.97836 | 6.28E-05 | 3643451  |
| C2_02960C_A | -4.9798  | 1.68E-08 | 3643011  |
| C5_02980C_A | -4.98388 | 3.57E-08 | 3637816  |
| C4_01960C_A | -4.98726 | 6.85E-14 | 3635664  |
| C7_03380W_A | -4.989   | 5.39E-05 | 30515359 |
| VTC4        | -4.98979 | 6.18E-14 | 3646795  |
| GYP7        | -5.0243  | 2.65E-13 | 3646245  |
| PTR22       | -5.02645 | 1.74E-12 | 3645634  |
| FAL1        | -5.03871 | 3.28E-08 | 3639839  |
| SOF1        | -5.04086 | 9.95E-12 | 3640585  |
| PRP8        | -5.05627 | 1.17E-15 | 3642125  |
| MRPL36      | -5.05782 | 1.17E-08 | 3643733  |
| CR_08680C_A | -5.07969 | 5.12E-15 | 3642127  |
| STE11       | -5.08724 | 2.02E-16 | 3637369  |
| C5_04080C_A | -5.09859 | 5.66E-13 | 3647731  |
| MNN14       | -5.11573 | 1.99E-17 | 3643651  |
| RPA34       | -5.11632 | 8.85E-06 | 3634883  |
| C4_05970W_A | -5.11899 | 1.61E-16 | 3646514  |
| SPB4        | -5.1286  | 6.41E-08 | 3647252  |
| PRP5        | -5.13199 | 3.99E-15 | 3638447  |
| C2_02280W_A | -5.15592 | 8.55E-12 | 3635806  |
| C5_03470C_A | -5.16242 | 7.02E-06 | 3646963  |
| RFG1        | -5.16656 | 1.08E-14 | 3642570  |
| C1_07130C_A | -5.17061 | 4.41E-10 | 3644462  |
| C1_10140C_A | -5.20076 | 8.12E-13 | 3634780  |
| FUN31       | -5.20413 | 7.3E-17  | 3642249  |
| C2_05830C_A | -5.20975 | 1.69E-09 | 3647483  |
| C1_11610C_A | -5.22038 | 7.74E-09 | 3645345  |
| C4_03950C_A | -5.24638 | 0.005258 | 30515263 |
| C5_05340W_A | -5.25915 | 9.44E-14 | 3636400  |
| RRP8        | -5.26232 | 2.57E-07 | 3643900  |
| C6_03800C_A | -5.27515 | 3.48E-16 | 3640310  |
| C1_12750C_A | -5.2769  | 1.48E-09 | 3646818  |
| HNM1        | -5.27878 | 3.7E-15  | 3638857  |
| CR_01630C_A | -5.27933 | 0.000516 | 3640085  |
| MUP1        | -5.28488 | 1.59E-13 | 3642008  |
| C1_09820C_A | -5.28658 | 0.01624  | 3634846  |

|             |          |          |         |
|-------------|----------|----------|---------|
| C5_02070C_A | -5.29359 | 4.11E-15 | 3643746 |
| C1_14380C_A | -5.30267 | 3.77E-07 | 3643285 |
| CR_07030C_A | -5.31731 | 4.93E-06 | 3645730 |
| SDA1        | -5.31883 | 4.85E-11 | 3646688 |
| DBP8        | -5.32215 | 3.19E-06 | 3646692 |
| C3_02020W_A | -5.32878 | 1.24E-12 | 3636592 |
| CR_01410C_A | -5.33697 | 2.4E-08  | 3640136 |
| UTP5        | -5.34291 | 3.59E-11 | 3638922 |
| C7_00340C_A | -5.3455  | 1.46E-16 | 3638040 |
| FHL1        | -5.34571 | 2.55E-15 | 3643493 |
| CAG1        | -5.34882 | 3.24E-05 | 3636469 |
| SFL1        | -5.35646 | 3.21E-17 | 3642498 |
| C3_03780W_A | -5.39691 | 0.048523 | 3645637 |
| C5_04120C_A | -5.40693 | 3.94E-09 | 3636522 |
| DHH1        | -5.41568 | 4.71E-08 | 3639490 |
| C6_04050W_A | -5.41832 | 1.13E-07 | 3647830 |
| C5_04910W_A | -5.42009 | 0.000317 | 3636417 |
| MOH1        | -5.42298 | 1.17E-11 | 3646809 |
| C2_02710C_A | -5.43049 | 1.87E-08 | 3643003 |
| C1_09520C_A | -5.43369 | 1.35E-14 | 3634766 |
| ATS1        | -5.43691 | 2.9E-09  | 3642079 |
| C4_02260C_A | -5.4526  | 1.66E-07 | 3635690 |
| C4_01500W_A | -5.45468 | 3.11E-09 | 3635617 |
| SRR1        | -5.46118 | 1.49E-08 | 3647589 |
| IFF6        | -5.46342 | 2.98E-14 | 3644087 |
| CR_07940W_A | -5.47876 | 7.96E-06 | 3644139 |
| STP4        | -5.48493 | 3.36E-07 | 3637405 |
| C2_03110W_A | -5.48824 | 0.001355 | 3642995 |
| CR_02940C_A | -5.48922 | 0.027435 | 3642589 |
| C4_05590W_A | -5.49067 | 1.86E-16 | 3641776 |
| JIP5        | -5.52505 | 5.15E-11 | 3634922 |
| NBP2        | -5.52601 | 2.8E-11  | 3636963 |
| CR_07750C_A | -5.54584 | 1.73E-09 | 3647350 |
| DOT4        | -5.54797 | 3.5E-18  | 3646810 |
| C2_06480W_A | -5.54956 | 5.02E-10 | 3646568 |
| PDR16       | -5.55619 | 0.000199 | 3644679 |
| DAC1        | -5.56366 | 3.23E-11 | 3645967 |
| SUV3        | -5.57124 | 6.15E-09 | 3645451 |
| PNG2        | -5.57897 | 2.62E-12 | 3645568 |
| YPT53       | -5.59668 | 4.46E-09 | 3642483 |
| FTH1        | -5.60063 | 4.25E-18 | 3634852 |
| CR_10410C_A | -5.60554 | 3.64E-11 | 3638957 |
| MET10       | -5.61783 | 6.31E-17 | 3644088 |
| C1_11160C_A | -5.6291  | 3.22E-05 | 3644399 |
| RXT3        | -5.63121 | 2.04E-11 | 3643431 |
| KRR1        | -5.63713 | 5.46E-07 | 3644542 |
| MAK21       | -5.66309 | 2.73E-20 | 3635147 |

|             |          |          |          |
|-------------|----------|----------|----------|
| C1_11080W_A | -5.66361 | 7.99E-18 | 3644416  |
| LEU42       | -5.67801 | 3.18E-13 | 3643808  |
| DIM1        | -5.68994 | 0.000195 | 3636135  |
| TYE7        | -5.69333 | 4.61E-16 | 3636203  |
| HAP42       | -5.69555 | 1.24E-17 | 3635729  |
| NOG1        | -5.69932 | 7.3E-10  | 3641736  |
| NSA1        | -5.71066 | 5.24E-08 | 3642313  |
| C6_00170C_A | -5.71748 | 1.55E-22 | 3647903  |
| NAR1        | -5.72508 | 7.95E-14 | 3634916  |
| C3_00230C_A | -5.73567 | 0.00069  | 3640557  |
| C1_05440C_A | -5.74475 | 8.3E-23  | 3642489  |
| C6_02290C_A | -5.74952 | 8.87E-12 | 3645873  |
| C2_04520C_A | -5.76908 | 8.12E-05 | 3645447  |
| C5_04290C_A | -5.77779 | 1.02E-12 | 3636455  |
| C5_01020C_A | -5.7878  | 0.010073 | 30515297 |
| ISY1        | -5.79154 | 4.38E-07 | 3646233  |
| C1_04510W_A | -5.79528 | 8.13E-06 | 3646147  |
| NOC4        | -5.80215 | 1.41E-10 | 3645224  |
| MRPL40      | -5.80967 | 1.46E-10 | 3640968  |
| PIR1        | -5.82314 | 2.51E-09 | 3645801  |
| C3_01110C_A | -5.85    | 0.023083 | 3639835  |
| HRQ2        | -5.85601 | 4.2E-07  | 3647850  |
| C4_00460C_A | -5.8664  | 9.22E-19 | 3645010  |
| CR_06980W_A | -5.86837 | 0.000249 | 3645735  |
| PHR3        | -5.88236 | 1.52E-17 | 3645003  |
| C4_03230C_A | -5.8869  | 0.003863 | 3637836  |
| C2_08030W_A | -5.89226 | 3.26E-09 | 3642309  |
| C1_09330W_A | -5.90792 | 8.52E-07 | 3634802  |
| C5_01560C_A | -5.91702 | 5.66E-11 | 3647064  |
| C3_07650C_A | -5.92663 | 2.93E-06 | 3638488  |
| PCL5        | -5.93352 | 4.42E-20 | 3636466  |
| C3_00840C_A | -5.93811 | 4.8E-05  | 3647758  |
| CIC1        | -5.93966 | 2.77E-07 | 3644059  |
| COX19       | -5.94204 | 1.45E-09 | 3636220  |
| NOP14       | -5.95277 | 9.46E-18 | 3635266  |
| MPP10       | -5.95974 | 3.55E-21 | 3647912  |
| SPR28       | -5.96176 | 0.001276 | 3637716  |
| OYE32       | -5.97023 | 4.7E-09  | 3642919  |
| C7_01210C_A | -5.98183 | 7.31E-12 | 3645904  |
| C7_03880C_A | -6.02003 | 0.000695 | 3643142  |
| C1_07960W_A | -6.02447 | 9.87E-06 | 3640725  |
| C6_01890C_A | -6.03534 | 5.35E-10 | 3641598  |
| C2_06800C_A | -6.03944 | 2.49E-09 | 3643518  |
| CR_01640C_A | -6.04056 | 0.044554 | 3640086  |
| MET16       | -6.0438  | 1.26E-09 | 3642964  |
| CR_06330C_A | -6.04626 | 1.95E-06 | 3644846  |
| C2_00090W_A | -6.06729 | 3.34E-06 | 3647910  |

|             |          |          |         |
|-------------|----------|----------|---------|
| GAC1        | -6.06957 | 8.87E-18 | 3638025 |
| C2_04570W_A | -6.09489 | 4.15E-08 | 3645441 |
| SUA71       | -6.10355 | 2.32E-15 | 3636879 |
| C1_06090C_A | -6.10667 | 3.66E-22 | 3639822 |
| BMT9        | -6.11158 | 6.78E-14 | 3635654 |
| MDM34       | -6.12714 | 1.47E-12 | 3647517 |
| HSX11       | -6.14776 | 7.36E-05 | 3635660 |
| C4_06040W_A | -6.15146 | 2.54E-06 | 3646521 |
| C2_08860W_A | -6.15194 | 1.42E-19 | 3645776 |
| C3_06370C_A | -6.15921 | 9.3E-19  | 3642258 |
| C2_06660W_A | -6.167   | 2.15E-06 | 3648418 |
| C3_00100W_A | -6.17205 | 8.05E-10 | 3640567 |
| C1_07950C_A | -6.1723  | 6.8E-07  | 3640724 |
| C1_02850W_A | -6.17945 | 3.05E-21 | 3636862 |
| C3_06760W_A | -6.18438 | 4.34E-07 | 3638502 |
| CR_00460C_A | -6.20341 | 5.73E-06 | 3639726 |
| C2_05640W_A | -6.27906 | 9.03E-17 | 3645566 |
| HIT1        | -6.28405 | 1.53E-05 | 3637854 |
| C1_13380W_A | -6.29573 | 7.58E-06 | 3636217 |
| C4_02520C_A | -6.30197 | 6.85E-13 | 3637863 |
| C3_05790C_A | -6.3091  | 2.84E-06 | 3641753 |
| C3_05440C_A | -6.32282 | 1.88E-06 | 3643668 |
| ELP3        | -6.32598 | 1.67E-17 | 3641747 |
| C4_00490W_A | -6.37549 | 2.68E-13 | 3645013 |
| C2_04120C_A | -6.38536 | 2.77E-10 | 3637377 |
| C1_13250W_A | -6.3899  | 1.91E-15 | 3636143 |
| C2_01540W_A | -6.40045 | 2.63E-09 | 3635804 |
| C3_05450C_A | -6.40094 | 7.59E-18 | 3643669 |
| C1_13880C_A | -6.40181 | 1.12E-11 | 3636133 |
| C5_00570W_A | -6.40339 | 4.48E-21 | 3641589 |
| CIRT4B      | -6.44934 | 2.53E-19 | 3642560 |
| DBP7        | -6.47231 | 1.53E-16 | 3645903 |
| C6_00380C_A | -6.47333 | 5.96E-11 | 3646085 |
| PDE2        | -6.50717 | 1.65E-27 | 3636877 |
| NRG1        | -6.52457 | 1.48E-13 | 3643166 |
| C6_01590W_A | -6.52691 | 2.03E-16 | 3641650 |
| C4_05160C_A | -6.54075 | 1.53E-19 | 3647411 |
| C1_09790C_A | -6.54276 | 1.01E-18 | 3634843 |
| MAK5        | -6.5514  | 6.58E-13 | 3643454 |
| C4_03830W_A | -6.5615  | 1.03E-06 | 3647851 |
| CR_03360W_A | -6.59482 | 8.53E-13 | 3645141 |
| DAL8        | -6.61396 | 9.97E-07 | 3635181 |
| C1_08240C_A | -6.6189  | 1.82E-05 | 3640759 |
| C3_02750W_A | -6.63836 | 4.88E-05 | 3638411 |
| C2_07250C_A | -6.64907 | 4.92E-05 | 3643487 |
| BRG1        | -6.6529  | 9E-12    | 3647664 |
| C4_00260W_A | -6.66502 | 2.6E-24  | 3645037 |

|             |          |          |          |
|-------------|----------|----------|----------|
| C4_04560C_A | -6.69151 | 3.52E-20 | 3641105  |
| C2_08180C_A | -6.69737 | 2.09E-09 | 3642317  |
| ABC1        | -6.7196  | 2.74E-19 | 3640239  |
| C6_02970C_A | -6.72162 | 2.81E-11 | 3639190  |
| CR_02550C_A | -6.72923 | 3.69E-10 | 3647689  |
| CR_09140C_A | -6.72964 | 6.44E-14 | 3641879  |
| C1_06820W_A | -6.72973 | 1.38E-14 | 3639493  |
| TCC1        | -6.73032 | 1.49E-21 | 3638524  |
| MEF2        | -6.74017 | 4.23E-11 | 3639564  |
| RRS1        | -6.7454  | 4.16E-05 | 3639352  |
| C2_01050W_A | -6.75809 | 0.008729 | 30515086 |
| NMD3        | -6.76821 | 1.99E-17 | 3646614  |
| C3_02350W_A | -6.773   | 2.45E-13 | 3636618  |
| C5_02440C_A | -6.7994  | 9.16E-09 | 3637728  |
| PCL1        | -6.80014 | 0.014697 | 3646356  |
| C3_04870W_A | -6.80211 | 0.013487 | 3635226  |
| HNT1        | -6.80895 | 5.2E-23  | 3644441  |
| C4_05230C_A | -6.83164 | 1.8E-10  | 3646156  |
| C6_03210C_A | -6.8443  | 3.1E-06  | 3639178  |
| CR_06870C_A | -6.87486 | 0.026539 | 3647318  |
| KCS1        | -6.87815 | 4.1E-10  | 3648120  |
| FLO8        | -6.90073 | 2.88E-23 | 3646292  |
| SUT1        | -6.90245 | 1.38E-22 | 3637706  |
| ICL1        | -6.93354 | 8.27E-07 | 3646146  |
| SEN15       | -6.9445  | 4.32E-06 | 3646411  |
| QDR1        | -6.95497 | 3.51E-19 | 3640941  |
| IFM1        | -6.9745  | 2.67E-17 | 3641389  |
| C5_02280C_A | -6.97641 | 1.7E-12  | 3637712  |
| C4_02770C_A | -6.98569 | 3.19E-09 | 3637903  |
| HSP70       | -7.00371 | 1.72E-05 | 3636229  |
| C3_06160C_A | -7.0077  | 3.96E-09 | 3641766  |
| PAM18       | -7.00845 | 9.82E-12 | 3645747  |
| C1_09550W_A | -7.00935 | 0.047174 | 3634886  |
| C2_03710W_A | -7.00935 | 0.047181 | 3637374  |
| C2_10000C_A | -7.00935 | 0.047188 | 30515163 |
| C1_04800C_A | -7.01139 | 0.044906 | 3644789  |
| C4_00530C_A | -7.01139 | 0.044908 | 3645746  |
| KAR4        | -7.04812 | 2.29E-07 | 3644937  |
| ATG1        | -7.07193 | 5.87E-25 | 3641175  |
| C4_00690C_A | -7.08994 | 5.5E-12  | 3645752  |
| FAR1        | -7.09733 | 9.91E-11 | 3637970  |
| BUD21       | -7.12508 | 2.81E-11 | 3640541  |
| CEK2        | -7.12574 | 2.54E-05 | 3642459  |
| ECM22       | -7.16488 | 3.91E-15 | 3648000  |
| C5_00310C_A | -7.18182 | 1.12E-09 | 3641576  |
| RPC10       | -7.18899 | 7.33E-10 | 3643292  |
| C1_12630C_A | -7.21157 | 3.55E-08 | 3646838  |



|             |          |          |         |
|-------------|----------|----------|---------|
| C5_03410C_A | -7.21395 | 4.21E-09 | 3646347 |
| C2_09160W_A | -7.21983 | 1.1E-08  | 3644090 |
| C1_10250C_A | -7.24636 | 3.17E-05 | 3634882 |
| RMP1        | -7.24894 | 0.000112 | 3636215 |
| RMS1        | -7.26858 | 8.34E-12 | 3646361 |
| C2_07020C_A | -7.27013 | 5.14E-07 | 3643497 |
| C3_07910W_A | -7.27258 | 0.036399 | 3647449 |
| SIP5        | -7.28057 | 6.19E-18 | 3639865 |
| C1_07660W_A | -7.28328 | 4.83E-08 | 3646656 |
| C5_01990W_A | -7.32633 | 0.001385 | 3643774 |
| NOP8        | -7.32705 | 2.16E-12 | 3646290 |
| C3_04620C_A | -7.33371 | 1.56E-06 | 3635155 |
| C3_07400W_A | -7.33877 | 8.24E-13 | 3638471 |
| TSR1        | -7.34574 | 3.62E-18 | 3642135 |
| CR_08470W_A | -7.34828 | 3.08E-19 | 3642134 |
| C5_01730W_A | -7.35398 | 4.58E-06 | 3643730 |
| C2_09570C_A | -7.35627 | 2.36E-05 | 3643811 |
| C5_04840C_A | -7.37287 | 1.22E-11 | 3636435 |
| SFP1        | -7.38984 | 3.71E-25 | 3635225 |
| CR_08080W_A | -7.39617 | 0.000184 | 3642094 |
| C3_05460W_A | -7.42122 | 1.23E-09 | 3643670 |
| WAR1        | -7.42997 | 7.29E-15 | 3644691 |
| C1_05270C_A | -7.43311 | 9.45E-12 | 3642476 |
| C3_01560W_A | -7.44538 | 7.22E-13 | 3636669 |
| C3_03460C_A | -7.45519 | 6.28E-10 | 3638359 |
| C1_10880W_A | -7.46489 | 3.79E-13 | 3644449 |
| C1_09210C_A | -7.47005 | 6.47E-15 | 3634897 |
| C5_04530W_A | -7.47641 | 1.3E-12  | 3636507 |
| C7_01020C_A | -7.48518 | 1.45E-10 | 3638020 |
| C6_01550C_A | -7.53607 | 5.98E-10 | 3641653 |
| SGD1        | -7.58407 | 1.87E-20 | 3643191 |
| OPT8        | -7.5846  | 3.6E-11  | 3640266 |
| WSC1        | -7.59707 | 2.93E-19 | 3635138 |
| C3_07570C_A | -7.60024 | 9.67E-14 | 3638522 |
| PAN6        | -7.60156 | 2.42E-13 | 3647684 |
| SSF1        | -7.6072  | 3.23E-12 | 3647085 |
| IFF8        | -7.62503 | 0.001154 | 3644117 |
| GCA2        | -7.63546 | 7.64E-16 | 3647194 |
| C3_02630C_A | -7.69636 | 3.78E-12 | 3638328 |
| C1_10970W_A | -7.71291 | 1.19E-18 | 3644427 |
| BUD5        | -7.72648 | 8.96E-22 | 3647315 |
| ARR3        | -7.72765 | 4.08E-09 | 3642910 |
| RIM2        | -7.73057 | 1.17E-08 | 3645448 |
| C1_06750W_A | -7.73277 | 1.07E-05 | 3639506 |
| SOK1        | -7.74729 | 4.3E-18  | 3642495 |
| MTG2        | -7.75437 | 2.48E-10 | 3646693 |
| C1_08630W_A | -7.7555  | 8.06E-13 | 3634928 |

|             |          |          |          |
|-------------|----------|----------|----------|
| C1_13390W_A | -7.76904 | 2.48E-08 | 3636218  |
| C1_10440W_A | -7.77385 | 5.47E-15 | 3647180  |
| TPS3        | -7.82442 | 1.91E-21 | 3641205  |
| C1_01160C_A | -7.87613 | 4.85E-14 | 3640204  |
| MET2        | -7.90587 | 2.2E-23  | 3640070  |
| C6_04240W_A | -7.93921 | 1.66E-06 | 3646276  |
| QDR3        | -7.9415  | 2.76E-12 | 3644023  |
| SAP10       | -7.95728 | 1.58E-12 | 3641126  |
| C2_07280W_A | -7.96899 | 0.00026  | 3643475  |
| CNS1        | -8.05404 | 6.93E-13 | 3639365  |
| C1_06440C_A | -8.05664 | 1.85E-11 | 3639552  |
| BUL4        | -8.06183 | 4.65E-14 | 3642037  |
| MRF1        | -8.06541 | 4.06E-18 | 3645321  |
| C1_05930C_A | -8.08452 | 1.64E-20 | 3639862  |
| C7_00590W_A | -8.15234 | 1.08E-12 | 3637994  |
| C3_07370W_A | -8.17044 | 1.24E-13 | 3638474  |
| NCS2        | -8.17212 | 1.19E-20 | 3643216  |
| NOP4        | -8.17219 | 1.57E-23 | 3647991  |
| C6_02660C_A | -8.18044 | 1.59E-06 | 3639224  |
| C5_02640W_A | -8.20727 | 9.69E-15 | 3637785  |
| C3_06940W_A | -8.23399 | 1.57E-20 | 3638509  |
| LIP1        | -8.26985 | 4.86E-06 | 3634888  |
| UTP18       | -8.2719  | 1.05E-15 | 3643123  |
| TRY6        | -8.27499 | 1.88E-05 | 3638499  |
| SPO11       | -8.29619 | 0.000102 | 3643873  |
| SRP40       | -8.32803 | 1.06E-24 | 3642605  |
| RPO41       | -8.33629 | 1.38E-21 | 3639378  |
| ARF1        | -8.38708 | 8.71E-28 | 3642130  |
| RRN3        | -8.41885 | 6.51E-25 | 3647925  |
| UGA6        | -8.42384 | 2.1E-06  | 3642975  |
| PET127      | -8.46792 | 7.06E-13 | 3644417  |
| CR_01710W_A | -8.48227 | 4.49E-09 | 3640130  |
| C1_14330W_A | -8.48369 | 3.9E-15  | 3643278  |
| NBP35       | -8.4919  | 1.78E-21 | 3647412  |
| CYC3        | -8.58761 | 1.44E-28 | 3642621  |
| UTP9        | -8.59044 | 8.05E-16 | 3638451  |
| C7_02610C_A | -8.62746 | 3.67E-24 | 3648285  |
| HCA4        | -8.6304  | 6.77E-18 | 3637911  |
| NSA2        | -8.66086 | 5.27E-13 | 3642259  |
| C1_11020W_A | -8.6629  | 6.11E-09 | 3644420  |
| C4_06790W_A | -8.6906  | 1.87E-17 | 3642918  |
| C2_04090W_A | -8.73538 | 0.017031 | 3637380  |
| ENP1        | -8.76223 | 1.17E-08 | 3647861  |
| C4_06200W_A | -8.83122 | 3.15E-05 | 30515282 |
| C1_04720W_A | -8.865   | 1.4E-09  | 30514988 |
| C1_06760C_A | -8.87284 | 4.38E-16 | 3639505  |
| SOD3        | -8.90882 | 9.03E-12 | 30515347 |

|             |          |          |          |
|-------------|----------|----------|----------|
| ALS6        | -8.92157 | 1.59E-13 | 3642266  |
| C2_05750W_A | -8.92563 | 4.42E-10 | 3645577  |
| C1_03840W_A | -8.93991 | 0.008325 | 30514984 |
| C1_02800W_A | -8.9433  | 0.012114 | 3636873  |
| C2_10810W_A | -8.94701 | 5.63E-11 | 3641243  |
| RRN11       | -8.99199 | 3.44E-16 | 3645276  |
| KRE6        | -8.99989 | 1.93E-21 | 3641756  |
| ELF1        | -9.01904 | 5.26E-26 | 3641903  |
| C1_02670C_A | -9.04228 | 0.025067 | 3636821  |
| CTA8        | -9.05742 | 5.08E-24 | 3634947  |
| TRY4        | -9.05997 | 3.56E-08 | 3635240  |
| CR_03980W_A | -9.06106 | 1.71E-14 | 3640964  |
| CR_04710W_A | -9.10306 | 4.94E-05 | 3648141  |
| C3_07290W_A | -9.12202 | 3.81E-28 | 3638430  |
| C4_03960W_A | -9.15723 | 8.32E-12 | 30515264 |
| C1_09710C_A | -9.16458 | 7.12E-21 | 3634818  |
| LAS1        | -9.17398 | 5.02E-16 | 3644073  |
| NAG3        | -9.18454 | 4.46E-16 | 3645969  |
| NOP13       | -9.2537  | 1.92E-10 | 3638469  |
| C1_01750W_A | -9.25589 | 1.95E-05 | 3645413  |
| ALS5        | -9.27355 | 3.39E-19 | 3640277  |
| C6_01040C_A | -9.28787 | 5.09E-17 | 3644014  |
| SPO1        | -9.2956  | 0.00084  | 3647039  |
| C4_03190W_A | -9.34875 | 6.06E-13 | 3637838  |
| C7_01690W_A | -9.40791 | 2.43E-12 | 3636980  |
| NAN1        | -9.41195 | 9.59E-25 | 3637932  |
| C4_04810C_A | -9.43111 | 3.2E-12  | 3641112  |
| POP3        | -9.45682 | 2.04E-09 | 3638993  |
| CR_08580C_A | -9.48844 | 2.18E-10 | 3642105  |
| ENP2        | -9.49871 | 7.09E-18 | 3646234  |
| C3_03250W_A | -9.51894 | 5.14E-32 | 3638318  |
| GST2        | -9.54139 | 3.45E-21 | 3637937  |
| CR_02420W_A | -9.60784 | 1.37E-14 | 3644926  |
| MRP17       | -9.62917 | 2.56E-16 | 3641548  |
| RRP15       | -9.6321  | 5.56E-09 | 3648397  |
| RAS2        | -9.66506 | 1.47E-21 | 3635211  |
| TSR2        | -9.6806  | 1.16E-14 | 3636845  |
| NDT80       | -9.73351 | 1.33E-29 | 3638840  |
| PZF1        | -9.74281 | 4.99E-12 | 3648113  |
| C3_06950W_A | -9.99767 | 4.17E-13 | 3638507  |
| RRP9        | -10.0128 | 4.95E-17 | 3642576  |
| C1_11530C_A | -10.0264 | 0.012639 | 3645334  |
| CR_01250C_A | -10.0264 | 0.012776 | 3640403  |
| C7_01880C_A | -10.0287 | 0.008965 | 3637031  |
| CR_04250W_A | -10.0302 | 0.01002  | 3640990  |
| C7_01940C_A | -10.1414 | 5.69E-33 | 3636971  |
| SLY41       | -10.2068 | 1.43E-25 | 3647139  |

|             |          |          |          |
|-------------|----------|----------|----------|
| SEN2        | -10.2643 | 2.18E-12 | 3637832  |
| CR_08720W_A | -10.3749 | 1.05E-11 | 3642122  |
| BUD22       | -10.3829 | 1.54E-15 | 3640391  |
| C2_09500W_A | -10.4064 | 2.97E-18 | 3643817  |
| CR_09800C_A | -10.4139 | 9.71E-28 | 3638984  |
| RNR22       | -10.459  | 2.16E-30 | 3645217  |
| C6_04530C_A | -10.5224 | 9.94E-28 | 3645970  |
| C3_02670W_A | -10.6402 | 1.05E-07 | 3638405  |
| SUL2        | -10.7694 | 2.19E-07 | 3637835  |
| C5_03920C_A | -10.7785 | 1.07E-15 | 3647448  |
| C2_09660W_A | -10.8531 | 1.12E-17 | 3643793  |
| C1_01610C_A | -10.8756 | 2.74E-11 | 3640225  |
| CR_09930W_A | -10.8891 | 4.36E-35 | 3639029  |
| C2_09610W_A | -10.9045 | 7.61E-19 | 3643798  |
| C2_10090C_A | -10.9095 | 4.58E-17 | 3643939  |
| KT112       | -10.9751 | 8.63E-15 | 3645140  |
| ROA1        | -11.0038 | 9.17E-31 | 3645424  |
| ZCF25       | -11.0086 | 0.002964 | 3635694  |
| CR_03660C_A | -11.0335 | 1.52E-13 | 3643219  |
| GZF3        | -11.0823 | 9.14E-31 | 3642563  |
| ALS9        | -11.0892 | 1.55E-17 | 3640281  |
| C3_05900W_A | -11.1448 | 1.16E-16 | 3641739  |
| C3_07550C_A | -11.2106 | 1.64E-19 | 3638525  |
| CHR1        | -11.2886 | 7.57E-33 | 3647601  |
| MTM1        | -11.3759 | 8.38E-18 | 3642487  |
| C6_02230W_A | -11.4536 | 2.88E-17 | 3645866  |
| C5_03080C_A | -11.4558 | 4.7E-33  | 3637701  |
| C6_04200C_A | -11.472  | 3.15E-08 | 30515344 |
| SNQ2        | -11.5092 | 1.39E-28 | 3640290  |
| C6_00520W_A | -11.5263 | 0.000978 | 3647147  |
| CR_00840C_A | -11.5271 | 0.001497 | 3640411  |
| C4_03350C_A | -11.5286 | 1.39E-11 | 3646794  |
| C3_01430W_A | -11.6611 | 1.28E-10 | 3636633  |
| C6_03200W_A | -11.6883 | 6.39E-31 | 3639177  |
| FCR1        | -11.7065 | 4.64E-16 | 3638542  |
| UGA3        | -11.725  | 3.37E-34 | 3638926  |
| C2_05810W_A | -11.7602 | 6.18E-24 | 3647481  |
| ZCF3        | -11.7654 | 1.21E-36 | 3645335  |
| C2_04700C_A | -11.8413 | 2.01E-07 | 3647794  |
| C1_01620C_A | -12.0019 | 2.33E-34 | 3640193  |
| C1_08840W_A | -12.0323 | 0.000483 | 3634919  |
| C2_09000C_A | -12.0419 | 5.67E-05 | 3645782  |
| MIH1        | -12.0508 | 7.07E-37 | 3648188  |
| DIP2        | -12.0688 | 3.84E-23 | 3640762  |
| LTV1        | -12.1665 | 1.06E-17 | 3639016  |
| C1_02450C_A | -12.1688 | 1.62E-08 | 3636849  |
| C7_00330C_A | -12.2366 | 1.1E-16  | 3638042  |

|             |          |          |         |
|-------------|----------|----------|---------|
| CR_04920W_A | -12.2629 | 2.64E-22 | 3648207 |
| CR_10470C_A | -12.3424 | 1.94E-18 | 3638979 |
| CLG1        | -12.3459 | 9.83E-32 | 3646030 |
| ELA1        | -12.4408 | 1.22E-15 | 3644680 |
| RFX1        | -12.4462 | 2.7E-13  | 3644844 |
| C2_05840W_A | -12.7285 | 6.36E-12 | 3647484 |
| NOG2        | -12.7704 | 5.53E-20 | 3640299 |
| C1_13130C_A | -12.8227 | 2.01E-18 | 3636202 |
| MSS116      | -12.8308 | 2.77E-21 | 3634792 |
| MFG1        | -12.833  | 8.85E-25 | 3643884 |
| C4_07020C_A | -12.9637 | 0.023698 | 3642965 |
| C3_04450C_A | -12.9637 | 0.023698 | 3635207 |
| C1_09300C_A | -12.9637 | 0.023698 | 3634831 |
| FRP5        | -12.9645 | 0.028296 | 3641600 |
| CR_04110W_A | -12.9701 | 2.44E-24 | 3641026 |
| C5_03800W_A | -12.9862 | 6.89E-29 | 3647230 |
| C7_03550C_A | -13.0448 | 0.006727 | 3646235 |
| C1_08830C_A | -13.0469 | 0.002995 | 3634918 |
| FGR50       | -13.0971 | 0.000152 | 3644859 |
| C2_06520C_A | -13.1381 | 1.17E-10 | 3646571 |
| C2_00410C_A | -13.169  | 6.19E-38 | 3638820 |
| ZCF2        | -13.171  | 2.5E-34  | 3642484 |
| C4_04200C_A | -13.2356 | 0.009004 | 3641182 |
| C1_08610C_A | -13.4165 | 2.41E-33 | 3646512 |
| RCH1        | -13.4537 | 1.56E-18 | 3645002 |
| RPA12       | -13.5642 | 4.9E-08  | 3643477 |
| FYV5        | -13.6438 | 1.65E-09 | 3647057 |
| C1_06350W_A | -13.7374 | 1.16E-32 | 3639562 |
| C4_05350W_A | -13.7735 | 5.08E-27 | 3646948 |
| C1_11000C_A | -13.7871 | 5.35E-12 | 3644422 |
| C1_13010W_A | -13.7994 | 7.97E-21 | 3636120 |
| GRF10       | -13.8328 | 6.83E-46 | 3636492 |
| C1_07650W_A | -13.8934 | 5.63E-15 | 3646657 |
| C5_03510C_A | -13.9502 | 6.8E-24  | 3646969 |
| C1_04710C_A | -14.003  | 3.12E-13 | 3644764 |
| RGS2        | -14.0933 | 1.76E-18 | 3646629 |
| DAL4        | -14.1331 | 0.001444 | 3638422 |
| XUT1        | -14.1741 | 2.01E-06 | 3642785 |
| HBR3        | -14.2108 | 6.13E-32 | 3645652 |
| C3_00410C_A | -14.3965 | 0.000119 | 3640552 |
| C7_01910C_A | -14.468  | 2.26E-21 | 3637029 |
| C1_10950C_A | -14.5666 | 9.66E-18 | 3644428 |
| MAK16       | -14.651  | 1.69E-17 | 3646920 |
| DED1        | -14.6563 | 3.66E-33 | 3641752 |
| RNR3        | -14.6726 | 1.95E-19 | 3647591 |
| C2_09880C_A | -14.6991 | 1.27E-17 | 3643779 |
| UTP22       | -14.8465 | 1.68E-34 | 3635760 |

|             |          |          |          |
|-------------|----------|----------|----------|
| C2_05330C_A | -14.9487 | 1.24E-20 | 3643426  |
| C3_05800W_A | -15.0911 | 7.7E-23  | 3641754  |
| C3_04730C_A | -15.1435 | 0.000412 | 3635250  |
| C1_08890C_A | -15.1445 | 0.000305 | 3634924  |
| CR_02030C_A | -15.1491 | 4.08E-24 | 3640152  |
| CDA2        | -15.2642 | 1.03E-08 | 3639716  |
| C1_11510C_A | -15.301  | 4.8E-19  | 3645336  |
| SCH9        | -15.456  | 6.38E-40 | 3637421  |
| C4_04300C_A | -15.5036 | 1.86E-11 | 3646843  |
| C2_00760C_A | -15.5288 | 1.19E-33 | 3638910  |
| C5_01710C_A | -15.5963 | 8.88E-13 | 3643732  |
| C1_05330C_A | -15.973  | 1.08E-24 | 3642485  |
| C1_01510W_A | -16.0125 | 3.1E-25  | 3640229  |
| C7_02600C_A | -16.0481 | 5.3E-46  | 3648286  |
| C1_11320C_A | -16.0586 | 8.81E-30 | 30515052 |
| PRM9        | -16.0706 | 0.00325  | 30515173 |
| TAZ1        | -16.3708 | 3.01E-11 | 3644108  |
| ECM1        | -16.4083 | 5.1E-13  | 3641224  |
| CYS3        | -16.4145 | 2.08E-44 | 3642081  |
| PTC8        | -16.4436 | 6.94E-37 | 3635674  |
| SAS10       | -16.4823 | 4.99E-24 | 3637899  |
| C2_02190C_A | -16.8422 | 1.15E-22 | 3635753  |
| C1_07790C_A | -16.8973 | 1.02E-16 | 3640706  |
| HEM3        | -16.9632 | 3.9E-37  | 3643940  |
| C1_01130W_A | -17.0401 | 1.09E-29 | 3640178  |
| C1_12440W_A | -17.2145 | 0.00019  | 3642012  |
| HGT17       | -17.8155 | 2.62E-05 | 3635687  |
| C7_04090C_A | -17.8904 | 3.16E-33 | 3643135  |
| ALS7        | -17.9089 | 4.91E-39 | 3642234  |
| PGA37       | -17.9781 | 3.74E-12 | 3636484  |
| CUP9        | -17.9858 | 6.07E-36 | 3636950  |
| C3_05840W_A | -18.5425 | 0.008007 | 3641757  |
| C4_07000W_A | -18.5454 | 0.006643 | 3642967  |
| RTA3        | -18.6041 | 9.94E-12 | 3646566  |
| SSU81       | -18.9381 | 1.36E-19 | 3634944  |
| C7_03460W_A | -19.0852 | 0.012291 | 3646712  |
| C2_02580W_A | -19.1069 | 1.45E-18 | 3635860  |
| C3_02040C_A | -19.2165 | 3.22E-15 | 3636579  |
| HWP2        | -19.2961 | 3.52E-05 | 3646803  |
| HAK1        | -19.4515 | 4.33E-07 | 3639546  |
| C5_04850W_A | -19.5016 | 2.46E-08 | 3636436  |
| C3_04510W_A | -19.6208 | 5.28E-13 | 3635258  |
| C5_02590C_A | -19.6544 | 3.11E-19 | 3637723  |
| RSM22       | -19.6799 | 5.21E-24 | 3642506  |
| ALD6        | -19.8827 | 2.71E-23 | 3647407  |
| C2_01060C_A | -20.2302 | 1.99E-11 | 3638835  |
| GAP2        | -20.4688 | 8.85E-25 | 3643662  |

|             |          |          |          |
|-------------|----------|----------|----------|
| C3_02840W_A | -20.5713 | 1.26E-08 | 3638331  |
| C1_11410C_A | -20.7328 | 2.24E-07 | 30515054 |
| FGR47       | -20.9504 | 1.49E-49 | 3641651  |
| REI1        | -21.1979 | 7.16E-24 | 3647536  |
| RIM8        | -21.2271 | 1.44E-43 | 3639342  |
| C4_02740W_A | -21.2364 | 8.93E-44 | 3637855  |
| C6_00290W_A | -21.8302 | 9.89E-36 | 3646069  |
| C1_01150C_A | -22.1556 | 1.03E-31 | 3640203  |
| CR_00310C_A | -22.5604 | 1.24E-38 | 3639715  |
| C4_06620C_A | -22.6825 | 5.24E-09 | 3642813  |
| C4_04520W_A | -22.7517 | 4.34E-32 | 3641110  |
| C4_04020C_A | -22.8387 | 0.000614 | 3641215  |
| C7_03850W_A | -23.0148 | 7.97E-17 | 3643145  |
| C2_06530W_A | -23.0907 | 1.38E-16 | 3646572  |
| GCS1        | -23.5912 | 4.11E-42 | 3640742  |
| NOP6        | -23.6567 | 1.38E-21 | 3639507  |
| GPD1        | -23.9051 | 2.39E-27 | 3643924  |
| C7_01680C_A | -24.0227 | 8.08E-56 | 3636981  |
| C6_02950C_A | -24.0923 | 2.6E-12  | 3639188  |
| MET1        | -24.1142 | 1.17E-52 | 3643014  |
| C6_03280W_A | -24.1283 | 0.002299 | 3639185  |
| CDR4        | -24.3183 | 1.56E-27 | 3640711  |
| HSP31       | -24.8724 | 2.81E-13 | 3644589  |
| RPN4        | -25.0181 | 6.06E-45 | 3644684  |
| C1_02690C_A | -25.1245 | 0.000205 | 3636823  |
| COX11       | -25.4249 | 5.78E-49 | 3646842  |
| HSP21       | -25.4615 | 2.02E-34 | 3637364  |
| CTA4        | -26.1803 | 6.65E-49 | 3641743  |
| C4_07260W_A | -26.6538 | 9.67E-14 | 3642942  |
| C1_09770W_A | -27.1348 | 2.38E-23 | 3634825  |
| C4_07140W_A | -27.2191 | 6.01E-50 | 3642936  |
| FRE10       | -27.6051 | 1.26E-23 | 3646841  |
| CR_06550C_A | -28.1201 | 1.34E-30 | 3645260  |
| QDR2        | -28.2638 | 3.77E-55 | 3643661  |
| C5_03440W_A | -28.3967 | 1.95E-12 | 30515310 |
| PRX1        | -28.5328 | 1.86E-51 | 3641357  |
| PGA57       | -28.8166 | 4.11E-08 | 3635608  |
| SMM1        | -28.8841 | 2.63E-23 | 3643778  |
| CR_01600C_A | -29.6009 | 2.87E-14 | 3640080  |
| C2_03690C_A | -29.736  | 2.82E-14 | 3637376  |
| CAN1        | -31.1094 | 4.69E-56 | 3644035  |
| KSP1        | -31.2592 | 2.6E-70  | 3644467  |
| C6_03810W_A | -31.3909 | 3.28E-40 | 3640286  |
| C1_13820C_A | -31.4248 | 7.38E-30 | 3636127  |
| CR_04220C_A | -33.1619 | 6.33E-15 | 3640943  |
| C2_04670W_A | -33.6217 | 1.87E-18 | 3647789  |
| FRE9        | -33.9704 | 8.62E-32 | 3643452  |

|             |          |          |          |
|-------------|----------|----------|----------|
| WOR2        | -35.2227 | 7.17E-15 | 3635230  |
| BMT1        | -36.8506 | 9.91E-53 | 3638535  |
| AQY1        | -37.4069 | 1.93E-29 | 3642587  |
| C6_03360C_A | -38.2784 | 6.37E-10 | 3639203  |
| C4_00810C_A | -39.8599 | 2.65E-12 | 3645742  |
| JEN2        | -40.0793 | 4.52E-17 | 3641214  |
| GIT3        | -40.7891 | 4.9E-60  | 3642634  |
| C6_01400W_A | -40.8796 | 0.000607 | 3641604  |
| C2_07070W_A | -40.8953 | 2.96E-28 | 3643501  |
| C7_00770W_A | -42.1863 | 2.29E-31 | 3637959  |
| C6_03180C_A | -42.9771 | 1.94E-63 | 3639261  |
| C2_08530C_A | -43.2456 | 2.3E-11  | 3643921  |
| CR_01510C_A | -46.4611 | 0.00029  | 3640104  |
| C6_03440W_A | -46.5519 | 2.29E-26 | 3640274  |
| CR_04940W_A | -47.3973 | 7.67E-13 | 3648209  |
| C6_01870C_A | -50.7162 | 1.52E-22 | 3641625  |
| CR_08830W_A | -52.163  | 6.31E-33 | 30515450 |
| FMP45       | -52.5234 | 3.39E-32 | 3637004  |
| C7_00880C_A | -60.5808 | 1.42E-73 | 3638052  |
| IFA14       | -64.8068 | 1.17E-10 | 3639012  |
| C2_02130C_A | -67.3784 | 1.81E-17 | 3635747  |
| C1_00190C_A | -70.1604 | 1.89E-43 | 3639337  |
| MNN1        | -74.3158 | 3.21E-31 | 3637784  |
| ZCF1        | -75.4146 | 6.4E-113 | 3638329  |
| C6_00810C_A | -75.642  | 7.97E-33 | 3647068  |
| C7_01430C_A | -76.832  | 7.09E-34 | 3636961  |
| AAH1        | -82.4632 | 3.34E-09 | 3643529  |
| C2_08580W_A | -85.5081 | 1.07E-05 | 3643916  |
| YWP1        | -88.876  | 1.91E-34 | 3643915  |
| EBP1        | -93.1105 | 5.51E-19 | 3644060  |
| SSU1        | -98.5082 | 1.41E-68 | 3641882  |
| C2_08260W_A | -100.567 | 7.26E-10 | 3642345  |
| C4_03340C_A | -106.627 | 4.59E-10 | 3648090  |
| AOX2        | -125.854 | 6E-100   | 3634945  |
| CR_01530C_A | -145.522 | 1.52E-15 | 3640072  |
| CR_07540C_A | -159.887 | 0.036087 | 3648001  |
| C5_00810C_A | -159.887 | 0.036087 | 3644127  |
| FGR42       | -159.887 | 0.036087 | 3647438  |
| GPI1        | -171.471 | 1.74E-27 | 3643680  |
| CR_06140W_A | -177.28  | 4.47E-85 | 3644862  |
| C5_04030W_A | -188.886 | 4.03E-42 | 3647737  |
| PHO87       | -194.163 | 8.03E-13 | 3639861  |
| C2_09330C_A | -196.885 | 0.028734 | 3644106  |
| C3_07930C_A | -246.29  | 0.02692  | 3647452  |
| RME1        | -269.953 | 6.63E-59 | 3644453  |
| CR_03320C_A | -286.063 | 0.023665 | 3645096  |
| C1_06430C_A | -307.813 | 0.018668 | 3639553  |



|             |          |          |          |
|-------------|----------|----------|----------|
| HSP30       | -484.077 | 2.45E-75 | 3645419  |
| KTI11       | -492.736 | 0.010359 | 30515125 |
| C2_02640C_A | -529.846 | 0.009273 | 30515095 |
| ARG11       | -640.77  | 0.007113 | 3635193  |
| C4_06910W_A | -746.962 | 3.77E-12 | 3642933  |
| C3_06170C_A | -751.873 | 0.005852 | 3642272  |
| C7_03560W_A | -854.455 | 1.08E-71 | 3646236  |
| C5_04380C_A | -973.677 | 0.003968 | 3636485  |
| CFL4        | -1343.35 | 0.002622 | 3642639  |
| CRZ2        | -2122.36 | 6.83E-61 | 3645725  |
| CR_08880C_A | -5848.68 | 0.000273 | 3641878  |
| C1_14630C_A | -26642   | 2.12E-05 | 3643291  |
| TAR1        | -48432   | 0        | 30515449 |

#### **B 20 vs Control**

| Name        | Fold change | P-value | GeneID   |
|-------------|-------------|---------|----------|
| ASG7        | #N/A        | #N/A    | 3639173  |
| ATO7        | #N/A        | #N/A    | 3635814  |
| BUD20       | #N/A        | #N/A    | 3645800  |
| C1_00020C_A | #N/A        | #N/A    | 3639374  |
| C1_01720C_A | #N/A        | #N/A    | 30514964 |
| C1_01970W_A | #N/A        | #N/A    | 30514967 |
| C1_03580W_A | #N/A        | #N/A    | 30514980 |
| C1_03880C_A | #N/A        | #N/A    | 3646409  |
| C1_04440W_A | #N/A        | #N/A    | 3646138  |
| C1_05550C_A | #N/A        | #N/A    | 30514994 |
| C1_05730W_A | #N/A        | #N/A    | 30515001 |
| C1_06300W_A | #N/A        | #N/A    | 30515004 |
| C1_06310W_A | #N/A        | #N/A    | 30515005 |
| C1_06490C_A | #N/A        | #N/A    | 30515009 |
| C1_06830W_A | #N/A        | #N/A    | 30515011 |
| C1_07320W_A | #N/A        | #N/A    | 30515023 |
| C1_07450W_A | #N/A        | #N/A    | 30515024 |
| C1_07940W_A | #N/A        | #N/A    | 30515027 |
| C1_08960W_A | #N/A        | #N/A    | 30515032 |
| C1_08970W_A | #N/A        | #N/A    | 30515033 |
| C1_09560C_A | #N/A        | #N/A    | 30515034 |
| C1_10050W_A | #N/A        | #N/A    | 3634811  |
| C1_10130W_A | #N/A        | #N/A    | 30515040 |
| C1_10590W_A | #N/A        | #N/A    | 30515042 |
| C1_10980W_A | #N/A        | #N/A    | 3644425  |
| C1_11180C_A | #N/A        | #N/A    | 30515050 |
| C1_11710C_A | #N/A        | #N/A    | 3645320  |
| C1_11780W_A | #N/A        | #N/A    | 30515057 |
| C1_12980W_A | #N/A        | #N/A    | 30515068 |
| C1_12990W_A | #N/A        | #N/A    | 30515069 |
| C1_13000W_A | #N/A        | #N/A    | 30515070 |

|             |      |      |          |
|-------------|------|------|----------|
| C1_13040C_A | #N/A | #N/A | 30515071 |
| C1_13290W_A | #N/A | #N/A | 3636146  |
| C1_13500C_A | #N/A | #N/A | 30515075 |
| C2_00050C_A | #N/A | #N/A | 3647922  |
| C2_00310W_A | #N/A | #N/A | 3638800  |
| C2_00560W_A | #N/A | #N/A | 3638854  |
| C2_00900W_A | #N/A | #N/A | 3638895  |
| C2_02080W_A | #N/A | #N/A | 30515093 |
| C2_03580W_A | #N/A | #N/A | 30515100 |
| C2_03630W_A | #N/A | #N/A | 3637438  |
| C2_04070C_A | #N/A | #N/A | 30515110 |
| C2_04610C_A | #N/A | #N/A | 30515113 |
| C2_05310C_A | #N/A | #N/A | 30515119 |
| C2_05420C_A | #N/A | #N/A | 30515121 |
| C2_05600W_A | #N/A | #N/A | 30515124 |
| C2_05880W_A | #N/A | #N/A | 30515129 |
| C2_05900W_A | #N/A | #N/A | 3647475  |
| C2_06400C_A | #N/A | #N/A | 30515135 |
| C2_06410W_A | #N/A | #N/A | 30515136 |
| C2_06560W_A | #N/A | #N/A | 30515139 |
| C2_07710W_A | #N/A | #N/A | 3642305  |
| C2_07870C_A | #N/A | #N/A | 3642319  |
| C2_08520C_A | #N/A | #N/A | 30515155 |
| C2_09110C_A | #N/A | #N/A | 3644114  |
| C2_09540W_A | #N/A | #N/A | 30515159 |
| C2_09550C_A | #N/A | #N/A | 30515160 |
| C2_09800C_A | #N/A | #N/A | 3643803  |
| C2_10800W_A | #N/A | #N/A | 30515169 |
| C3_00140W_A | #N/A | #N/A | 3640596  |
| C3_01050C_A | #N/A | #N/A | 3639831  |
| C3_01740C_A | #N/A | #N/A | 30515178 |
| C3_02880W_A | #N/A | #N/A | 3638335  |
| C3_04150W_A | #N/A | #N/A | 30515202 |
| C3_05640W_A | #N/A | #N/A | 3643654  |
| C3_05660C_A | #N/A | #N/A | 3643656  |
| C3_05820W_A | #N/A | #N/A | 30515212 |
| C3_06390W_A | #N/A | #N/A | 30515216 |
| C4_00640W_A | #N/A | #N/A | 3645767  |
| C4_01570C_A | #N/A | #N/A | 30515236 |
| C4_01580C_A | #N/A | #N/A | 30515237 |
| C4_01590C_A | #N/A | #N/A | 30515238 |
| C4_01600C_A | #N/A | #N/A | 30515239 |
| C4_01610C_A | #N/A | #N/A | 30515240 |
| C4_01620C_A | #N/A | #N/A | 30515241 |
| C4_01630C_A | #N/A | #N/A | 30515242 |
| C4_01640C_A | #N/A | #N/A | 30515243 |
| C4_02650C_A | #N/A | #N/A | 30515249 |

|             |      |      |          |
|-------------|------|------|----------|
| C4_03480C_A | #N/A | #N/A | 3646815  |
| C4_04040W_A | #N/A | #N/A | 3641213  |
| C4_04490C_A | #N/A | #N/A | 30515269 |
| C4_06180C_A | #N/A | #N/A | 30515281 |
| C4_06520W_A | #N/A | #N/A | 30515284 |
| C4_06630C_A | #N/A | #N/A | 3642812  |
| C4_06640C_A | #N/A | #N/A | 3642811  |
| C5_00530W_A | #N/A | #N/A | 3641537  |
| C5_01030W_A | #N/A | #N/A | 30515298 |
| C5_01150C_A | #N/A | #N/A | 30515299 |
| C5_01160C_A | #N/A | #N/A | 30515300 |
| C5_02130W_A | #N/A | #N/A | 3637733  |
| C5_02850W_A | #N/A | #N/A | 30515305 |
| C5_03450W_A | #N/A | #N/A | 30515311 |
| C5_03890C_A | #N/A | #N/A | 30515312 |
| C5_04450C_A | #N/A | #N/A | 30515315 |
| C5_04690C_A | #N/A | #N/A | 30515320 |
| C6_00220C_A | #N/A | #N/A | 30515324 |
| C6_01540C_A | #N/A | #N/A | 30515333 |
| C6_02390W_A | #N/A | #N/A | 30515339 |
| C6_02400W_A | #N/A | #N/A | 30515340 |
| C6_03570W_A | #N/A | #N/A | 3640248  |
| C6_04150W_A | #N/A | #N/A | 30515343 |
| C7_00540W_A | #N/A | #N/A | 30515348 |
| C7_01000C_A | #N/A | #N/A | 3638022  |
| C7_01060W_A | #N/A | #N/A | 3637950  |
| C7_01130C_A | #N/A | #N/A | 3645912  |
| C7_01260W_A | #N/A | #N/A | 30515352 |
| C7_02130W_A | #N/A | #N/A | 3636997  |
| C7_02190W_A | #N/A | #N/A | 30515356 |
| C7_02360W_A | #N/A | #N/A | 3636931  |
| C7_02420C_A | #N/A | #N/A | 3636975  |
| C7_04070C_A | #N/A | #N/A | 3643153  |
| CR_00450C_A | #N/A | #N/A | 30515367 |
| CR_00500C_A | #N/A | #N/A | 30515368 |
| CR_00720W_A | #N/A | #N/A | 3640441  |
| CR_02320W_A | #N/A | #N/A | 30515381 |
| CR_02470W_A | #N/A | #N/A | 30515382 |
| CR_02660C_A | #N/A | #N/A | 30515383 |
| CR_03190C_A | #N/A | #N/A | 30515388 |
| CR_04620C_A | #N/A | #N/A | 3640952  |
| CR_05350W_A | #N/A | #N/A | 30515405 |
| CR_05370W_A | #N/A | #N/A | 30515406 |
| CR_05470C_A | #N/A | #N/A | 30515409 |
| CR_06190C_A | #N/A | #N/A | 30515418 |
| CR_06200C_A | #N/A | #N/A | 30515419 |
| CR_06210C_A | #N/A | #N/A | 30515420 |

|             |      |      |          |
|-------------|------|------|----------|
| CR_06220C_A | #N/A | #N/A | 30515421 |
| CR_06580W_A | #N/A | #N/A | 3646627  |
| CR_06600C_A | #N/A | #N/A | 30515422 |
| CR_06630W_A | #N/A | #N/A | 30515423 |
| CR_07300W_A | #N/A | #N/A | 3646059  |
| CR_08140W_A | #N/A | #N/A | 30515435 |
| CR_10320W_A | #N/A | #N/A | 3638938  |
| CR_10460W_A | #N/A | #N/A | 30515457 |
| CSA2        | #N/A | #N/A | 3642930  |
| FGR18       | #N/A | #N/A | 3644112  |
| GTT1        | #N/A | #N/A | 3643653  |
| ITS1        | #N/A | #N/A | 30515447 |
| ITS2        | #N/A | #N/A | 30515448 |
| MFA1        | #N/A | #N/A | 30515153 |
| MFALPHA     | #N/A | #N/A | 3646420  |
| MRV3        | #N/A | #N/A | 3636546  |
| PGA12       | #N/A | #N/A | 3638920  |
| PGA19       | #N/A | #N/A | 3638894  |
| PGA22       | #N/A | #N/A | 3644939  |
| PGA44       | #N/A | #N/A | 3636647  |
| PGA50       | #N/A | #N/A | 3647524  |
| PTR2        | #N/A | #N/A | 3640089  |
| RBR1        | #N/A | #N/A | 3640986  |
| RDN18       | #N/A | #N/A | 3648135  |
| RDN25       | #N/A | #N/A | 3648137  |
| RDN5        | #N/A | #N/A | 3648138  |
| RDN58       | #N/A | #N/A | 3648136  |
| RHD2        | #N/A | #N/A | 3637891  |
| RPR1        | #N/A | #N/A | 30515150 |
| SCR1        | #N/A | #N/A | 30515392 |
| SNR52       | #N/A | #N/A | 30515222 |
| SNR6        | #N/A | #N/A | 30515211 |
| SPR3        | #N/A | #N/A | 3635853  |
| tA(AGC)1    | #N/A | #N/A | 30515148 |
| tA(AGC)2    | #N/A | #N/A | 30515199 |
| tA(AGC)3    | #N/A | #N/A | 30514965 |
| tA(AGC)4    | #N/A | #N/A | 30514960 |
| tA(AGC)5    | #N/A | #N/A | 30515321 |
| tA(AGC)7    | #N/A | #N/A | 30515078 |
| tA(UGC)1    | #N/A | #N/A | 30515336 |
| tA(UGC)2    | #N/A | #N/A | 30515342 |
| tC(GCA)1    | #N/A | #N/A | 30515411 |
| tC(GCA)2    | #N/A | #N/A | 30515410 |
| tD(GUC)2    | #N/A | #N/A | 30515261 |
| tD(GUC)3    | #N/A | #N/A | 30515260 |
| tD(GUC)4    | #N/A | #N/A | 30515259 |
| tD(GUC)5    | #N/A | #N/A | 30515114 |

|          |      |      |          |
|----------|------|------|----------|
| tD(GUC)6 | #N/A | #N/A | 30515233 |
| tD(GUC)7 | #N/A | #N/A | 30515452 |
| tE(CUC)1 | #N/A | #N/A | 30515101 |
| tE(UUC)1 | #N/A | #N/A | 30515196 |
| tE(UUC)2 | #N/A | #N/A | 30515184 |
| tE(UUC)3 | #N/A | #N/A | 30515295 |
| tE(UUC)4 | #N/A | #N/A | 30515294 |
| tE(UUC)5 | #N/A | #N/A | 30515309 |
| tE(UUC)6 | #N/A | #N/A | 30515198 |
| tE(UUC)7 | #N/A | #N/A | 30515445 |
| tF(GAA)1 | #N/A | #N/A | 30515191 |
| tF(GAA)2 | #N/A | #N/A | 30515103 |
| tF(GAA)3 | #N/A | #N/A | 30515107 |
| tF(GAA)4 | #N/A | #N/A | 30515166 |
| tF(GAA)5 | #N/A | #N/A | 30515224 |
| tG(CCC)1 | #N/A | #N/A | 30515228 |
| tG(GCC)1 | #N/A | #N/A | 30515432 |
| tG(GCC)2 | #N/A | #N/A | 30515258 |
| tG(GCC)3 | #N/A | #N/A | 30515115 |
| tG(GCC)4 | #N/A | #N/A | 30515231 |
| tG(GCC)5 | #N/A | #N/A | 30515230 |
| tG(GCC)6 | #N/A | #N/A | 30515446 |
| tG(UCC)1 | #N/A | #N/A | 30515172 |
| tG(UCC)2 | #N/A | #N/A | 30515229 |
| tH(GUG)1 | #N/A | #N/A | 30515401 |
| tH(GUG)3 | #N/A | #N/A | 30515217 |
| tI(AAU)1 | #N/A | #N/A | 30515138 |
| tI(AAU)2 | #N/A | #N/A | 30515147 |
| tI(AAU)3 | #N/A | #N/A | 30515122 |
| tI(AAU)4 | #N/A | #N/A | 30515272 |
| tI(AAU)5 | #N/A | #N/A | 30515440 |
| tI(UAU)1 | #N/A | #N/A | 30515045 |
| tK(CUU)1 | #N/A | #N/A | 30515193 |
| tK(CUU)2 | #N/A | #N/A | 30515206 |
| tK(UUU)1 | #N/A | #N/A | 30515181 |
| tK(UUU)2 | #N/A | #N/A | 30515428 |
| tK(UUU)3 | #N/A | #N/A | 30515436 |
| tK(UUU)4 | #N/A | #N/A | 30515437 |
| tK(UUU)5 | #N/A | #N/A | 30515438 |
| tL(AAG)1 | #N/A | #N/A | 30515379 |
| tL(AAG)2 | #N/A | #N/A | 30515022 |
| tL(CAA)1 | #N/A | #N/A | 30515091 |
| tL(CAA)2 | #N/A | #N/A | 30515087 |
| tL(CAA)3 | #N/A | #N/A | 30515346 |
| tL(CAA)4 | #N/A | #N/A | 30515444 |
| tL(CAA)5 | #N/A | #N/A | 30515322 |
| tL(CAA)6 | #N/A | #N/A | 30515362 |

|          |      |      |          |
|----------|------|------|----------|
| tL(UAA)1 | #N/A | #N/A | 30515089 |
| tL(UAA)2 | #N/A | #N/A | 30515375 |
| tL(UAA)3 | #N/A | #N/A | 30514979 |
| tL(UAA)4 | #N/A | #N/A | 30515017 |
| tL(UAA)5 | #N/A | #N/A | 30515360 |
| tM(CAU)1 | #N/A | #N/A | 30515188 |
| tM(CAU)2 | #N/A | #N/A | 30515145 |
| tM(CAU)3 | #N/A | #N/A | 30515132 |
| tM(CAU)4 | #N/A | #N/A | 30515451 |
| tN(GUU)1 | #N/A | #N/A | 30514997 |
| tN(GUU)2 | #N/A | #N/A | 30514996 |
| tN(GUU)3 | #N/A | #N/A | 30514978 |
| tN(GUU)4 | #N/A | #N/A | 30515455 |
| tP(AGG)1 | #N/A | #N/A | 30515016 |
| tP(UGG)1 | #N/A | #N/A | 30514992 |
| tP(UGG)2 | #N/A | #N/A | 30515157 |
| tP(UGG)3 | #N/A | #N/A | 30514956 |
| tP(UGG)4 | #N/A | #N/A | 30515413 |
| tP(UGG)5 | #N/A | #N/A | 30515412 |
| tQ(CUG)1 | #N/A | #N/A | 30515296 |
| tQ(UUG)1 | #N/A | #N/A | 30515257 |
| tQ(UUG)3 | #N/A | #N/A | 30515118 |
| tQ(UUG)4 | #N/A | #N/A | 30515271 |
| tQ(UUG)5 | #N/A | #N/A | 30515270 |
| tR(ACG)1 | #N/A | #N/A | 30515408 |
| tR(ACG)2 | #N/A | #N/A | 30515407 |
| tR(CCG)1 | #N/A | #N/A | 30514970 |
| tR(CCU)1 | #N/A | #N/A | 30515177 |
| tR(UCU)1 | #N/A | #N/A | 30515192 |
| tR(UCU)2 | #N/A | #N/A | 30515102 |
| tR(UCU)3 | #N/A | #N/A | 30515106 |
| tR(UCU)4 | #N/A | #N/A | 30514971 |
| tR(UCU)5 | #N/A | #N/A | 30515223 |
| tS(AGA)1 | #N/A | #N/A | 30515416 |
| tS(AGA)2 | #N/A | #N/A | 30515425 |
| tS(AGA)3 | #N/A | #N/A | 30515415 |
| tS(AGA)4 | #N/A | #N/A | 30515126 |
| tS(CAG)1 | #N/A | #N/A | 30515292 |
| tS(CGA)1 | #N/A | #N/A | 30515036 |
| tS(GCU)1 | #N/A | #N/A | 30515398 |
| tS(GCU)2 | #N/A | #N/A | 30515397 |
| tS(UGA)1 | #N/A | #N/A | 30514963 |
| tS(UGA)2 | #N/A | #N/A | 30515279 |
| tS(UGA)3 | #N/A | #N/A | 30515235 |
| tT(AGU)1 | #N/A | #N/A | 30514998 |
| tT(AGU)3 | #N/A | #N/A | 30515369 |
| tT(AGU)4 | #N/A | #N/A | 30515116 |

|             |          |          |          |
|-------------|----------|----------|----------|
| tT(AGU)6    | #N/A     | #N/A     | 30514952 |
| tT(CGU)1    | #N/A     | #N/A     | 30514983 |
| tT(UGU)1    | #N/A     | #N/A     | 30515252 |
| tT(UGU)2    | #N/A     | #N/A     | 30515278 |
| tV(AAC)1    | #N/A     | #N/A     | 30515094 |
| tV(AAC)2    | #N/A     | #N/A     | 30515180 |
| tV(AAC)3    | #N/A     | #N/A     | 30515380 |
| tV(AAC)4    | #N/A     | #N/A     | 30515414 |
| tV(AAC)5    | #N/A     | #N/A     | 30515209 |
| tV(AAC)6    | #N/A     | #N/A     | 30515210 |
| tV(CAC)1    | #N/A     | #N/A     | 30515081 |
| tV(UAC)1    | #N/A     | #N/A     | 30515165 |
| tW(CCA)1    | #N/A     | #N/A     | 30515064 |
| tW(CCA)2    | #N/A     | #N/A     | 30515220 |
| tY(GUA)1    | #N/A     | #N/A     | 30515058 |
| tY(GUA)2    | #N/A     | #N/A     | 30515183 |
| tY(GUA)3    | #N/A     | #N/A     | 30515221 |
| tY(GUA)4    | #N/A     | #N/A     | 30515059 |
| ZCF4        | #N/A     | #N/A     | 3641799  |
| CDC11       | 406.0459 | 0.000405 | 3647888  |
| C1_04180W_A | 275.1658 | 0.00097  | 3644716  |
| C1_13100W_A | 237.2895 | 0.00147  | 30515073 |
| HOM6        | 223.57   | 2.29E-09 | 3636815  |
| MCD4        | 192.4306 | 0.001931 | 3642036  |
| COG4        | 179.0322 | 0.002182 | 3645571  |
| DPM2        | 175.9478 | 0.002316 | 30515325 |
| MLC1        | 162.1611 | 0.00288  | 30515387 |
| SNZ1        | 154.2732 | 1.56E-16 | 3636803  |
| LYS22       | 142.9577 | 5.43E-20 | 3645466  |
| C3_06750W_A | 142.5395 | 0.003657 | 30515219 |
| DPM1        | 141.1045 | 4.01E-08 | 3640700  |
| C6_02140W_A | 136.9144 | 0.003689 | 3645886  |
| VMA10       | 129.9214 | 0.00406  | 3645215  |
| CR_05310W_A | 126.3412 | 0.004293 | 3648125  |
| C4_05390W_A | 124.5216 | 0.004469 | 3646951  |
| CDC10       | 119.6006 | 1.02E-07 | 3640947  |
| C3_06670C_A | 108.4452 | 0.006297 | 3642254  |
| C3_02530W_A | 108.3182 | 0.006189 | 30515189 |
| C4_02460W_A | 107.5906 | 0.006038 | 3637844  |
| C7_00240W_A | 103.5097 | 0.006161 | 3637980  |
| SAM51       | 99.31514 | 0.006635 | 3641582  |
| ALI1        | 96.26341 | 0.007021 | 3636635  |
| PMI1        | 96.06303 | 1.05E-10 | 3643795  |
| OST1        | 90.52435 | 3.71E-07 | 3643657  |
| THR1        | 89.41438 | 4.15E-07 | 3641572  |
| TNA1        | 88.85096 | 0.009031 | 3637827  |
| FAD1        | 87.68012 | 0.008455 | 3634930  |

|             |          |          |          |
|-------------|----------|----------|----------|
| C3_02620C_A | 86.03809 | 0.008813 | 3638326  |
| C4_02600C_A | 82.00375 | 0.009426 | 3637912  |
| ECM331      | 73.75977 | 0.011475 | 3637731  |
| ERV46       | 73.22009 | 1.13E-09 | 3644129  |
| HHT21       | 73.1974  | 7.21E-06 | 3644707  |
| PDI1        | 72.86423 | 6.02E-28 | 3641367  |
| AMO2        | 70.75814 | 1.81E-12 | 3648021  |
| CR_00280C_A | 69.6498  | 0.012617 | 3639719  |
| C2_10010C_A | 68.89955 | 0.012723 | 3643962  |
| C1_10560C_A | 66.0944  | 0.013729 | 3647196  |
| C1_07490C_A | 65.68499 | 0.01403  | 3646666  |
| C6_00400C_A | 64.81734 | 0.014183 | 3646087  |
| LYS9        | 64.53346 | 9.09E-15 | 3642279  |
| PMT2        | 64.53029 | 3.99E-23 | 3638538  |
| ACO2        | 60.92014 | 5.29E-12 | 3646708  |
| FGR6-10     | 60.54686 | 0.01612  | 3641770  |
| C5_03000C_A | 59.96836 | 0.016217 | 3637818  |
| C1_03600W_A | 59.63087 | 4.75E-06 | 3636880  |
| C1_06250W_A | 59.33154 | 0.016317 | 3647525  |
| HIS1        | 57.14062 | 2.39E-16 | 3636501  |
| CR_06380C_A | 55.47311 | 0.017879 | 3648139  |
| DAG7        | 54.80046 | 3.27E-14 | 3635607  |
| C6_01880W_A | 53.89083 | 0.019453 | 3641599  |
| C2_05510C_A | 53.32149 | 0.019194 | 3643420  |
| ILV5        | 52.94697 | 1.46E-23 | 3644012  |
| C6_02180W_A | 52.87934 | 0.019379 | 3645861  |
| CCN1        | 52.85854 | 0.019346 | 3643735  |
| C4_03170W_A | 52.39649 | 0.01984  | 3637840  |
| HRT2        | 52.05355 | 1.47E-05 | 3635709  |
| LYS1        | 50.86196 | 1.62E-18 | 6335429  |
| C1_03150C_A | 50.54045 | 0.021426 | 30514976 |
| KAR3        | 49.75862 | 0.021314 | 3644078  |
| HIS5        | 49.06609 | 2.24E-08 | 3645756  |
| MCD1        | 48.98444 | 0.022234 | 3639044  |
| SHE3        | 48.9707  | 1.79E-05 | 3639277  |
| C5_02780W_A | 48.9067  | 0.022039 | 3637803  |
| PMM1        | 48.82919 | 3.58E-12 | 3636852  |
| DPP1        | 48.79069 | 0.022809 | 3644537  |
| ASN1        | 48.38851 | 1.67E-29 | 3645790  |
| TUB2        | 47.90142 | 1.2E-10  | 3639329  |
| C1_14320C_A | 47.17984 | 1.5E-05  | 3643316  |
| POL30       | 46.88248 | 1.56E-05 | 3635583  |
| CR_10130W_A | 46.76085 | 0.023672 | 3638970  |
| ERG28       | 46.1889  | 0.024003 | 3638833  |
| SEC21       | 45.95567 | 4.78E-17 | 3644786  |
| AGM1        | 45.83945 | 1.85E-05 | 3636138  |
| PHA2        | 45.72024 | 0.024502 | 3638346  |



|             |          |          |          |
|-------------|----------|----------|----------|
| C6_00660C_A | 44.87771 | 0.025219 | 3647133  |
| C6_03320W_A | 43.65185 | 8.63E-10 | 3639198  |
| C6_00710W_A | 43.00341 | 0.0273   | 3647073  |
| TRP4        | 42.89982 | 4.25E-08 | 3642904  |
| C2_09590C_A | 42.42258 | 0.029786 | 3643800  |
| C7_03650W_A | 42.29636 | 0.027696 | 3646224  |
| PGA6        | 42.09467 | 4.77E-05 | 3634774  |
| ARF3        | 41.58626 | 9.11E-05 | 3636628  |
| C1_07920W_A | 41.28948 | 0.028951 | 30515026 |
| YNK1        | 41.18569 | 7.34E-15 | 3637746  |
| ERV29       | 41.1595  | 3.55E-12 | 3635672  |
| ARO3        | 40.53567 | 4.86E-21 | 3635770  |
| CR_01490C_A | 40.51879 | 1.8E-09  | 30515376 |
| LSC1        | 40.50232 | 7.09E-15 | 3640199  |
| CWH43       | 40.41714 | 3.13E-10 | 3640389  |
| C2_05720C_A | 39.85327 | 3.24E-10 | 3645574  |
| PMT4        | 39.1898  | 9.12E-17 | 3644096  |
| EMP24       | 38.68005 | 1.49E-07 | 3647247  |
| C5_04310W_A | 38.67483 | 0.032178 | 3636477  |
| CAR1        | 38.57203 | 1.62E-24 | 3636503  |
| C4_02080W_A | 38.37425 | 0.033095 | 3635643  |
| IFE1        | 38.2529  | 0.036211 | 3644778  |
| DDC1        | 38.22512 | 0.032867 | 3638374  |
| C3_07130W_A | 38.19304 | 0.033725 | 3638440  |
| CWH8        | 38.11502 | 0.03336  | 3644598  |
| CR_04650W_A | 37.98332 | 0.033613 | 30515396 |
| C2_01420C_A | 37.63153 | 0.033851 | 3635841  |
| CDC28       | 37.36951 | 4.38E-05 | 3644838  |
| ASF1        | 37.32236 | 0.034049 | 3647348  |
| C1_02100W_A | 37.31863 | 0.034033 | 3644578  |
| RFA2        | 36.63303 | 5.25E-05 | 3643506  |
| MNT4        | 36.42031 | 0.035065 | 3647300  |
| JEM1        | 36.104   | 4.27E-07 | 3643876  |
| C3_06730W_A | 35.11955 | 0.036811 | 3638504  |
| C1_05100W_A | 35.11251 | 0.036702 | 3647669  |
| HGT12       | 35.08086 | 0.036943 | 3638048  |
| YOX1        | 34.54032 | 0.038589 | 3637952  |
| ACP12       | 34.51254 | 6.45E-05 | 3637361  |
| DCG1        | 34.46972 | 0.038134 | 3638373  |
| C1_02760W_A | 34.11503 | 8.54E-11 | 3636870  |
| RET2        | 33.89244 | 9.2E-15  | 3637714  |
| TEM1        | 33.85644 | 0.041939 | 3636923  |
| CR_04490C_A | 33.78614 | 0.03868  | 3641013  |
| C4_01140C_A | 33.7658  | 0.038306 | 3635657  |
| C5_03970W_A | 33.60294 | 0.0399   | 3647443  |
| CR_06500C_A | 33.44098 | 0.039693 | 3645274  |
| HIS7        | 33.25733 | 3.94E-14 | 3647868  |

|             |          |          |          |
|-------------|----------|----------|----------|
| CR_09330C_A | 33.07476 | 6.17E-16 | 3641899  |
| C7_00680W_A | 32.88518 | 0.039754 | 3637967  |
| GUP1        | 32.6537  | 0.040471 | 3636171  |
| PXP2        | 32.13964 | 0.042191 | 3636558  |
| C7_00220W_A | 31.98172 | 0.042025 | 3637984  |
| ARC18       | 31.95339 | 0.042201 | 3644056  |
| C3_07540C_A | 31.91293 | 0.04234  | 3638526  |
| PRI2        | 31.79625 | 0.04308  | 3642788  |
| C2_02330W_A | 31.56205 | 0.042788 | 3635811  |
| TUB4        | 30.70429 | 0.044614 | 3641774  |
| C3_06640W_A | 30.22917 | 0.045797 | 3642251  |
| ERV25       | 30.16464 | 1.37E-10 | 3642243  |
| SEC23       | 30.08194 | 1.17E-18 | 3641818  |
| OGG1        | 29.32393 | 0.048141 | 3643106  |
| CR_03470W_A | 28.88377 | 0.000184 | 3643198  |
| PHR1        | 27.89135 | 1.78E-24 | 3641108  |
| SEC22       | 27.73284 | 0.000222 | 30515391 |
| CR_05800C_A | 27.23897 | 0.000233 | 3646706  |
| CR_05130C_A | 26.97175 | 0.000277 | 3646401  |
| ERP5        | 26.93663 | 7.46E-10 | 30515046 |
| HOM3        | 26.58608 | 1.04E-11 | 3641771  |
| MET6        | 26.57654 | 4.95E-27 | 3640084  |
| TUB1        | 26.22009 | 9.05E-14 | 3641930  |
| CEK1        | 26.16379 | 2.78E-07 | 3642789  |
| ATP19       | 26.15547 | 0.000228 | 30515061 |
| C1_06700W_A | 26.03628 | 0.00023  | 3639511  |
| ASH2        | 25.31822 | 0.000282 | 3636445  |
| C2_05290C_A | 25.31005 | 2.09E-07 | 3643472  |
| DOG1        | 25.23772 | 0.000297 | 3641597  |
| C1_07260C_A | 25.11474 | 0.000279 | 3644456  |
| SSR1        | 24.81012 | 5.04E-13 | 3638055  |
| C5_05020C_A | 24.65637 | 2.91E-09 | 3636486  |
| C4_06140C_A | 24.43743 | 0.000512 | 3642821  |
| SMC1        | 24.2106  | 8.24E-06 | 3643221  |
| LEU4        | 23.88518 | 2.32E-07 | 3639339  |
| ENA21       | 23.85014 | 1.28E-27 | 3641392  |
| SWI6        | 23.77737 | 0.000372 | 3634932  |
| MCM2        | 23.74465 | 0.000382 | 3643197  |
| ATP18       | 23.72355 | 0.000358 | 30515084 |
| IDP1        | 23.4614  | 2.36E-12 | 3647474  |
| PMT1        | 23.37171 | 9.03E-21 | 3641393  |
| C6_02190C_A | 23.26296 | 7.75E-06 | 3645862  |
| C6_01460C_A | 23.24269 | 1.93E-10 | 3641623  |
| SER33       | 22.96806 | 1.46E-20 | 3642030  |
| POL1        | 22.84275 | 2.17E-10 | 3635144  |
| RFC5        | 22.84046 | 0.000466 | 3638890  |
| CEX1        | 22.52134 | 1.37E-07 | 3644913  |

|             |          |          |          |
|-------------|----------|----------|----------|
| C4_04380C_A | 22.33243 | 0.001573 | 30515266 |
| LYS12       | 21.91838 | 1.48E-14 | 3640134  |
| CR_03950W_A | 21.81382 | 0.000561 | 3640960  |
| MCM6        | 21.66099 | 2.05E-07 | 3640142  |
| PGA63       | 21.65504 | 1.56E-21 | 3639524  |
| C7_00670C_A | 21.34635 | 2.94E-10 | 3638024  |
| CR_00990W_A | 21.33279 | 0.000572 | 3640425  |
| ATP1        | 21.31433 | 6.05E-25 | 3646134  |
| ARO4        | 21.10176 | 2.86E-23 | 3647668  |
| HET1        | 20.64012 | 1.61E-13 | 3647897  |
| HTA2        | 20.58905 | 7.67E-08 | 3644715  |
| CR_09230C_A | 20.57057 | 2.83E-07 | 3641918  |
| CRH11       | 20.4949  | 0.000673 | 3637905  |
| C1_02970W_A | 20.32729 | 3.68E-15 | 3636835  |
| ERG11       | 20.31074 | 8.79E-10 | 3641571  |
| MTS1        | 20.20753 | 1.38E-15 | 3634873  |
| DPM3        | 20.16598 | 2.29E-05 | 30515245 |
| APE3        | 19.95406 | 3.41E-07 | 3643875  |
| ERG6        | 19.74397 | 4.63E-08 | 3636655  |
| C1_06920C_A | 19.57578 | 0.000954 | 3639525  |
| HHT2        | 19.54691 | 1.06E-06 | 3647326  |
| C5_01230C_A | 19.36819 | 2.57E-11 | 3642618  |
| C1_06050C_A | 19.31331 | 0.000989 | 30515003 |
| KAR2        | 19.14525 | 8.36E-20 | 3638830  |
| SEC13       | 19.12796 | 7.19E-12 | 3638425  |
| C3_02140C_A | 19.11193 | 7.03E-07 | 3636656  |
| C2_10200W_A | 19.08437 | 0.001179 | 3643928  |
| C5_02920W_A | 18.94948 | 0.001079 | 3637751  |
| SOU1        | 18.84178 | 4.33E-05 | 3642799  |
| CR_03000C_A | 18.84141 | 0.001105 | 3642597  |
| CDC21       | 18.75703 | 0.001195 | 3643463  |
| TSA1        | 18.74438 | 6.31E-21 | 3642269  |
| FRP2        | 18.66683 | 5.73E-08 | 3638008  |
| RBT4        | 18.50603 | 2.79E-10 | 3639534  |
| MIS11       | 18.41703 | 2.3E-15  | 3645732  |
| CR_06170W_A | 18.37592 | 0.001217 | 3644865  |
| SEC12       | 18.34094 | 2.91E-12 | 3641639  |
| STT3        | 18.21213 | 3.23E-14 | 3635743  |
| SAC1        | 18.18757 | 6.99E-08 | 3634864  |
| BFR1        | 18.1865  | 4.47E-16 | 3635579  |
| C2_07650C_A | 17.99902 | 2.84E-05 | 3642342  |
| SEP7        | 17.98058 | 8.42E-08 | 3644596  |
| C1_04780C_A | 17.93633 | 4.54E-08 | 3644774  |
| CR_03330W_A | 17.90707 | 0.001269 | 3645095  |
| CMP1        | 17.87449 | 3.54E-09 | 3639328  |
| C4_00710W_A | 17.84933 | 3.17E-05 | 3645750  |
| MET13       | 17.79704 | 4.07E-13 | 3638382  |

|             |          |          |          |
|-------------|----------|----------|----------|
| TSA1B       | 17.58265 | 1.13E-19 | 30515214 |
| LYS4        | 17.50046 | 1.36E-09 | 3641180  |
| RPS17B      | 17.46694 | 4.32E-15 | 30515044 |
| C2_07140W_A | 17.39697 | 5.48E-10 | 3643508  |
| RGD1        | 17.34527 | 3.03E-06 | 3639868  |
| C1_02500W_A | 17.22083 | 0.001627 | 3636795  |
| TOS1        | 17.12775 | 4.46E-15 | 3636566  |
| C1_11860W_A | 17.0753  | 3.23E-15 | 3642009  |
| SPE3        | 16.94607 | 2.6E-11  | 3643528  |
| QCR2        | 16.84526 | 2.22E-12 | 3646352  |
| PHO15       | 16.76887 | 5.39E-08 | 3644459  |
| CDC46       | 16.71384 | 5.68E-06 | 3646912  |
| LEU2        | 16.7109  | 4.91E-06 | 3638034  |
| PYC2        | 16.69224 | 1.54E-21 | 3637323  |
| SSA2        | 16.62024 | 1.25E-14 | 3644711  |
| MNT1        | 16.53563 | 6.12E-18 | 3636585  |
| CDC12       | 16.50981 | 9.61E-13 | 3636809  |
| CYB5        | 16.46188 | 7.96E-05 | 3637965  |
| C1_01190C_A | 16.3918  | 6.31E-05 | 3640207  |
| CYT1        | 16.35053 | 1.84E-11 | 3643441  |
| DOA1        | 16.2458  | 1.37E-11 | 3634871  |
| LHS1        | 16.20511 | 7.03E-14 | 3643032  |
| MYO2        | 15.97738 | 1.34E-13 | 3636140  |
| MSH6        | 15.92072 | 6.52E-08 | 3636161  |
| HAT1        | 15.91804 | 6.55E-05 | 3644770  |
| RNR1        | 15.87371 | 2.91E-14 | 3642989  |
| LAT1        | 15.83677 | 4.58E-18 | 3636986  |
| CAR2        | 15.78708 | 1.04E-21 | 3645027  |
| SEC18       | 15.69786 | 2.5E-14  | 3636208  |
| RAD53       | 15.66208 | 6.84E-05 | 3645633  |
| DDR48       | 15.59607 | 1.06E-07 | 3644061  |
| MES1        | 15.56214 | 2.28E-14 | 3636516  |
| C2_07010W_A | 15.48026 | 2.44E-10 | 3643535  |
| BGL2        | 15.27355 | 2.61E-15 | 3635691  |
| SRB1        | 15.2707  | 7.25E-20 | 3647454  |
| C2_01630W_A | 15.26577 | 0.000176 | 3635738  |
| ATP3        | 15.2309  | 2.34E-14 | 3640387  |
| C1_04430C_A | 15.22375 | 0.002396 | 30514986 |
| C4_00390W_A | 15.19026 | 7.18E-05 | 3645016  |
| SAR1        | 15.13975 | 4.6E-10  | 3645865  |
| CR_10530W_A | 15.12212 | 0.002387 | 3639042  |
| CWH41       | 15.01524 | 3.78E-08 | 3646533  |
| CR_05500C_A | 15.01049 | 0.002495 | 3647598  |
| C1_03940W_A | 14.80591 | 9.22E-05 | 3646415  |
| ACT1        | 14.78859 | 1.65E-21 | 3636195  |
| ERG26       | 14.68054 | 6.26E-06 | 3642803  |
| CBR1        | 14.59997 | 3.42E-08 | 3646961  |

|             |          |          |          |
|-------------|----------|----------|----------|
| ASK1        | 14.54672 | 0.002722 | 3635656  |
| SER1        | 14.51162 | 2.64E-12 | 3646909  |
| C1_09980C_A | 14.43771 | 0.000115 | 3634863  |
| APL2        | 14.25341 | 1.69E-10 | 3638343  |
| HUT1        | 14.12068 | 0.000264 | 3638505  |
| CR_05360C_A | 13.90819 | 0.003384 | 3648033  |
| C5_00080C_A | 13.87614 | 1.81E-10 | 3647886  |
| KTR4        | 13.84255 | 0.003244 | 3646425  |
| C2_07540W_A | 13.83664 | 0.003244 | 3645222  |
| SOL3        | 13.80437 | 2.11E-05 | 3646625  |
| C3_06630W_A | 13.73056 | 0.003377 | 3642250  |
| GIN4        | 13.66342 | 8.52E-08 | 3644543  |
| CR_10440W_A | 13.64613 | 0.003734 | 3638976  |
| SEC20       | 13.63676 | 0.000145 | 3639206  |
| C5_03120W_A | 13.49933 | 0.003626 | 3637705  |
| GND1        | 13.4515  | 6.42E-14 | 3636131  |
| SPC2        | 13.42051 | 0.000249 | 3645769  |
| LSC2        | 13.40363 | 2.98E-13 | 3646618  |
| PSF2        | 13.39695 | 0.004014 | 3647534  |
| C6_02480W_A | 13.26999 | 1.04E-05 | 3639170  |
| SSH1        | 13.22844 | 6.86E-08 | 3642504  |
| C2_03970W_A | 13.13212 | 0.004004 | 3637419  |
| RAD54       | 13.13111 | 0.005378 | 3636192  |
| RHB1        | 13.06233 | 0.000251 | 3635232  |
| CLC1        | 12.97633 | 1.67E-11 | 3635662  |
| OPI3        | 12.91513 | 0.004242 | 3642277  |
| CR_03520C_A | 12.88094 | 5.13E-08 | 3643203  |
| SEC62       | 12.84839 | 5.64E-10 | 3636860  |
| C2_09040W_A | 12.82866 | 1.46E-07 | 3645792  |
| AAT1        | 12.81671 | 3.63E-16 | 3643468  |
| CR_08480C_A | 12.57128 | 7.06E-08 | 30515442 |
| PDB1        | 12.56998 | 1.95E-16 | 3641186  |
| C4_04160W_A | 12.5144  | 2.53E-12 | 3641185  |
| C4_07080C_A | 12.50956 | 0.00029  | 3642905  |
| PDX1        | 12.49573 | 9.17E-13 | 3636128  |
| EGD2        | 12.4542  | 1.08E-12 | 3635284  |
| C1_07590C_A | 12.43572 | 4.19E-06 | 3646673  |
| RPL24A      | 12.39965 | 8.28E-13 | 3641174  |
| C3_00520W_A | 12.3143  | 0.000287 | 3640513  |
| MSB1        | 12.31125 | 2.34E-07 | 3648218  |
| C4_04980W_A | 12.23604 | 6.17E-05 | 3641167  |
| CSM3        | 12.23378 | 0.005474 | 3644083  |
| EAF6        | 12.20868 | 0.005221 | 3646494  |
| PLC2        | 12.07308 | 4.87E-05 | 3642985  |
| QCR8        | 12.03389 | 5.03E-08 | 30515112 |
| FRS2        | 12.03274 | 6.69E-14 | 3636824  |
| TEF2        | 12.00451 | 2.35E-18 | 3646502  |

|             |          |          |          |
|-------------|----------|----------|----------|
| THR4        | 11.98206 | 9.1E-13  | 3637711  |
| C3_06400C_A | 11.97039 | 0.000301 | 3642260  |
| C1_09060C_A | 11.93232 | 0.007717 | 3634772  |
| COF1        | 11.9188  | 2.52E-11 | 30515293 |
| HOM2        | 11.87905 | 8.26E-14 | 3635826  |
| RFC2        | 11.87858 | 4.39E-05 | 3637939  |
| CR_05010W_A | 11.87009 | 0.000344 | 3646389  |
| MNS1        | 11.85955 | 2.88E-09 | 3644692  |
| APL4        | 11.82786 | 3.15E-09 | 3642565  |
| C4_04440W_A | 11.73857 | 3.35E-09 | 3641177  |
| VRG4        | 11.71523 | 1.43E-09 | 3641768  |
| C6_04100W_A | 11.62362 | 2.63E-09 | 3647836  |
| C1_12650C_A | 11.55875 | 0.00738  | 3646836  |
| SKN1        | 11.48118 | 1.67E-11 | 3641755  |
| EGD1        | 11.4401  | 2.61E-13 | 3645340  |
| CAS1        | 11.43106 | 5.9E-05  | 3645324  |
| C6_00770C_A | 11.41669 | 0.007058 | 3647079  |
| COX5        | 11.39963 | 1.85E-09 | 3634768  |
| C4_01510W_A | 11.39051 | 1.59E-06 | 3635616  |
| GDE1        | 11.31519 | 1.83E-11 | 3636505  |
| RFA1        | 11.24159 | 1.36E-09 | 3638823  |
| HMG1        | 11.22866 | 3.59E-10 | 3644687  |
| HHO1        | 11.22623 | 0.000189 | 30515358 |
| C5_01960C_A | 11.17034 | 8.65E-11 | 3643738  |
| OSH3        | 11.16694 | 1.08E-07 | 3645368  |
| C2_01910W_A | 11.16297 | 0.007332 | 3635790  |
| C2_09780C_A | 11.15201 | 1.96E-08 | 3643805  |
| C4_02930W_A | 11.12911 | 0.000953 | 3637876  |
| ALG8        | 11.10155 | 0.000609 | 3636562  |
| DED81       | 11.08953 | 1.43E-12 | 3646227  |
| ARO8        | 11.06642 | 1.01E-16 | 3638828  |
| MET15       | 11.04391 | 3.73E-12 | 3645031  |
| C7_01710W_A | 11.03878 | 8.31E-09 | 3637012  |
| TVP18       | 11.00045 | 8.07E-05 | 3634844  |
| ADK1        | 10.99047 | 3.76E-11 | 3644533  |
| RPP2A       | 10.9492  | 2.83E-11 | 30515439 |
| MEU1        | 10.94716 | 1.19E-07 | 3645635  |
| RPS15       | 10.93509 | 2.61E-12 | 3635194  |
| ALS4        | 10.88601 | 6.83E-14 | 3647972  |
| C2_06610C_A | 10.81072 | 0.00865  | 30515140 |
| C1_03240W_A | 10.78065 | 5.94E-05 | 3636895  |
| CR_00130C_A | 10.76485 | 5.41E-08 | 3639709  |
| CTP1        | 10.72318 | 6.47E-05 | 3635141  |
| C3_07230W_A | 10.72238 | 1.46E-09 | 3638531  |
| C3_01070C_A | 10.70899 | 0.008924 | 3639832  |
| CR_02060W_A | 10.69427 | 1.42E-09 | 3640155  |
| DPB4        | 10.6643  | 5.84E-05 | 3638818  |

|             |          |          |          |
|-------------|----------|----------|----------|
| ZWF1        | 10.63483 | 1.28E-10 | 3634913  |
| ILV2        | 10.63139 | 1.98E-15 | 3636552  |
| SAM4        | 10.63126 | 1.72E-12 | 3646506  |
| RIC1        | 10.60785 | 5.56E-05 | 3639331  |
| C2_06770W_A | 10.54858 | 0.009716 | 3643515  |
| CR_09520C_A | 10.51288 | 0.001137 | 3647103  |
| CAM1-1      | 10.45604 | 2.25E-12 | 3646358  |
| C5_00840W_A | 10.44894 | 0.001089 | 3644130  |
| CHO1        | 10.39041 | 1.03E-05 | 3644557  |
| ILV6        | 10.33833 | 2.74E-10 | 3635598  |
| C1_04030W_A | 10.32999 | 6.93E-05 | 3646428  |
| SGA1        | 10.28961 | 1.49E-05 | 3636652  |
| C1_06630W_A | 10.2843  | 1.05E-05 | 3639544  |
| C6_03130W_A | 10.26933 | 7.83E-05 | 30515341 |
| ERG2        | 10.23639 | 0.010629 | 3639347  |
| C2_00590W_A | 10.18429 | 0.001042 | 3638851  |
| C5_02210W_A | 10.15276 | 4.77E-06 | 3637759  |
| SMC5        | 10.12788 | 1.08E-05 | 3645103  |
| ARO2        | 10.11045 | 4.6E-13  | 3648190  |
| C7_03310W_A | 10.03312 | 0.00108  | 3646726  |
| ALD5        | 9.973648 | 2.83E-16 | 3643026  |
| C2_02020W_A | 9.961019 | 1.21E-08 | 3635769  |
| LYS2        | 9.958425 | 3.57E-14 | 3636875  |
| C3_06920W_A | 9.943139 | 3.5E-07  | 3638511  |
| TOP2        | 9.897009 | 1.89E-08 | 3642777  |
| ERG13       | 9.891973 | 6.82E-09 | 3641881  |
| CAC2        | 9.89002  | 0.00119  | 3646978  |
| C1_09670C_A | 9.88735  | 0.012141 | 3634872  |
| RPL8B       | 9.83142  | 9.76E-15 | 3635198  |
| C5_05350W_A | 9.789826 | 3.02E-05 | 3636401  |
| ATP2        | 9.779436 | 3.52E-16 | 3645039  |
| CYP1        | 9.752543 | 4.87E-11 | 3636978  |
| ACS2        | 9.73279  | 9.97E-12 | 3644710  |
| C2_07420W_A | 9.731897 | 1.11E-06 | 3645202  |
| GRP1        | 9.695598 | 0.001271 | 3634899  |
| C1_05180C_A | 9.673148 | 0.013357 | 30514990 |
| TRP3        | 9.671622 | 1.81E-08 | 3642035  |
| SMC2        | 9.636691 | 3.61E-05 | 3643918  |
| HSL1        | 9.633713 | 9.97E-08 | 3637810  |
| IDH1        | 9.577579 | 4.34E-14 | 3634893  |
| OAC1        | 9.569628 | 0.015849 | 3642245  |
| C4_03290W_A | 9.464996 | 4.29E-09 | 3637887  |
| DUT1        | 9.463191 | 0.000171 | 3640188  |
| C4_05790W_A | 9.405931 | 2.71E-06 | 3641784  |
| C5_02380W_A | 9.401487 | 2.38E-16 | 3637794  |
| SMC3        | 9.369147 | 0.001873 | 3638408  |
| C1_07510W_A | 9.365794 | 0.001861 | 3646664  |

|             |          |          |          |
|-------------|----------|----------|----------|
| C7_04000W_A | 9.343899 | 4.25E-06 | 3643114  |
| PDR17       | 9.329259 | 0.001783 | 3643007  |
| REX3        | 9.306021 | 0.01417  | 3636164  |
| C6_02880W_A | 9.304157 | 0.014306 | 3639238  |
| CR_00880W_A | 9.208763 | 0.002302 | 3640397  |
| HYR1        | 9.208644 | 0.016633 | 3636226  |
| MPS1        | 9.187556 | 0.014587 | 3641888  |
| CR_04080C_A | 9.18505  | 1.55E-10 | 3641023  |
| VMA2        | 9.139385 | 5.95E-12 | 3646710  |
| SOD1        | 9.136383 | 8.11E-06 | 30515248 |
| C1_11960C_A | 9.077334 | 0.014934 | 30515060 |
| C6_02560W_A | 9.050264 | 3.06E-05 | 3639205  |
| C3_05280C_A | 9.037409 | 4.67E-05 | 3635202  |
| EXO1        | 9.015506 | 0.000227 | 3641583  |
| PTP3        | 9.006547 | 6.33E-11 | 3638940  |
| ECM33       | 8.997922 | 7.89E-11 | 30514977 |
| TAL1        | 8.978829 | 4.67E-09 | 3643225  |
| C1_04200C_A | 8.972663 | 0.000216 | 3644718  |
| DQD1        | 8.971236 | 2.82E-07 | 3643488  |
| C2_07110C_A | 8.965256 | 6.26E-06 | 3643505  |
| INP51       | 8.9525   | 6.58E-05 | 3643806  |
| ADE6        | 8.92592  | 1.65E-12 | 3647304  |
| DSL1        | 8.920435 | 0.000229 | 3645718  |
| CDC54       | 8.872699 | 0.000332 | 3647606  |
| SPC3        | 8.854483 | 7.85E-05 | 3636121  |
| HAM1        | 8.84441  | 2.44E-08 | 3647224  |
| CR_04730W_A | 8.836171 | 0.000296 | 3647305  |
| MMS21       | 8.82169  | 0.002024 | 3642265  |
| CLB4        | 8.787597 | 0.002218 | 3643102  |
| C4_04970C_A | 8.726785 | 0.00027  | 30515274 |
| C4_00020W_A | 8.704132 | 6.56E-09 | 3648053  |
| IPP1        | 8.690845 | 1.16E-09 | 3643874  |
| C2_09050C_A | 8.634304 | 5.51E-05 | 3645791  |
| THS1        | 8.624168 | 1.55E-13 | 3647882  |
| C1_00700W_A | 8.609057 | 0.016597 | 3639330  |
| C5_03290C_A | 8.567203 | 0.018509 | 30515307 |
| APL5        | 8.553657 | 7.36E-09 | 3638377  |
| SEC61       | 8.53935  | 1.86E-12 | 3647462  |
| C2_03020C_A | 8.522299 | 9.43E-11 | 3643019  |
| SEC8        | 8.513353 | 1.09E-07 | 3647078  |
| HFL1        | 8.508766 | 0.002184 | 3636883  |
| ARC35       | 8.494841 | 5.46E-06 | 3639823  |
| C1_12910W_A | 8.486211 | 0.002485 | 30515066 |
| GEA2        | 8.44741  | 1.46E-09 | 3636646  |
| LEU1        | 8.425389 | 3.17E-10 | 3639685  |
| GFA1        | 8.419144 | 4.71E-09 | 3636557  |
| ABG1        | 8.413124 | 5.69E-06 | 3647715  |



|             |          |          |          |
|-------------|----------|----------|----------|
| TOM20       | 8.381722 | 4.03E-07 | 3636817  |
| BIO2        | 8.379576 | 0.018683 | 3640106  |
| PPT2        | 8.375903 | 0.018765 | 3634762  |
| RAM1        | 8.368571 | 0.00224  | 3647859  |
| C1_06480C_A | 8.313301 | 5.59E-06 | 30515008 |
| UBA2        | 8.281534 | 2.55E-06 | 3640701  |
| PHO114      | 8.262969 | 0.019539 | 3635644  |
| RPL43A      | 8.255183 | 6.69E-10 | 30515319 |
| C4_06940C_A | 8.242936 | 1.63E-05 | 3642928  |
| FAS2        | 8.242185 | 1.26E-11 | 3635222  |
| CDC42       | 8.241186 | 3.55E-06 | 3646488  |
| C4_04800W_A | 8.230399 | 7.74E-11 | 3641113  |
| CDC19       | 8.228037 | 7.66E-13 | 3643438  |
| C6_02250W_A | 8.225596 | 0.021815 | 3645869  |
| LAP41       | 8.222554 | 4.43E-07 | 3636653  |
| C2_01260W_A | 8.204708 | 0.002587 | 3638792  |
| PRS         | 8.203115 | 0.000441 | 3640100  |
| ADE1        | 8.201105 | 5.05E-09 | 3639722  |
| PMT5        | 8.198749 | 1.53E-05 | 3639011  |
| C2_02410W_A | 8.179274 | 2.61E-07 | 3635755  |
| TMA19       | 8.170876 | 4.53E-12 | 3640399  |
| MRP8        | 8.152179 | 2.33E-05 | 3641178  |
| RTT109      | 8.150998 | 0.021029 | 3639678  |
| ARC40       | 8.141019 | 9.63E-11 | 3644866  |
| RAD52       | 8.131569 | 6.85E-05 | 3647148  |
| C7_03640C_A | 8.099616 | 0.002586 | 3646223  |
| RHO3        | 8.085924 | 1.59E-05 | 3643448  |
| GRS1        | 8.074464 | 7.89E-12 | 3642474  |
| C3_01310W_A | 8.013649 | 2.25E-05 | 3636620  |
| C7_03800W_A | 8.009412 | 0.000694 | 3643150  |
| C1_02330C_A | 7.976665 | 2.64E-09 | 30514969 |
| C2_09630C_A | 7.951831 | 0.025076 | 3643796  |
| STV1        | 7.941664 | 7E-10    | 3646070  |
| CDC3        | 7.931708 | 2.33E-10 | 3644719  |
| NPL4        | 7.912293 | 8.84E-06 | 3639820  |
| KRE5        | 7.891782 | 1.92E-09 | 3638384  |
| MCR1        | 7.882138 | 5.8E-09  | 3647561  |
| C1_02290C_A | 7.877088 | 9.1E-05  | 3644568  |
| YPT31       | 7.851293 | 3.17E-09 | 3647999  |
| C4_01460C_A | 7.828443 | 0.003057 | 3635622  |
| GLC3        | 7.821332 | 1.53E-10 | 3639200  |
| CR_04500C_A | 7.818015 | 7.61E-07 | 3641014  |
| PDA1        | 7.772054 | 1.66E-13 | 3642902  |
| CR_01320C_A | 7.732949 | 7.23E-06 | 3640386  |
| ACB1        | 7.709871 | 6.68E-06 | 30515350 |
| ASM3        | 7.661342 | 0.003953 | 3639332  |
| RFC3        | 7.655825 | 0.000803 | 3647440  |

|             |          |          |          |
|-------------|----------|----------|----------|
| PST3        | 7.650721 | 8.2E-10  | 3648031  |
| TSC11       | 7.624203 | 0.003531 | 3645267  |
| CR_04760C_A | 7.621528 | 0.004454 | 3647303  |
| C2_09100C_A | 7.616783 | 5.71E-05 | 3644113  |
| PRO2        | 7.61595  | 1.41E-09 | 3638532  |
| RPS12       | 7.564102 | 1.82E-09 | 3638438  |
| SEC27       | 7.533233 | 6.86E-10 | 3645870  |
| C3_02210C_A | 7.531265 | 9.7E-06  | 3636641  |
| KEX2        | 7.525802 | 1.74E-10 | 3634914  |
| C1_05320C_A | 7.524919 | 0.000111 | 3642470  |
| SPE1        | 7.518258 | 8.61E-10 | 3639327  |
| C2_03340W_A | 7.463353 | 8.92E-06 | 3637392  |
| MDH1-1      | 7.462519 | 2.73E-07 | 3635636  |
| C4_04920W_A | 7.449416 | 0.00015  | 3641172  |
| C1_03170C_A | 7.44279  | 0.030963 | 3636805  |
| C2_07550W_A | 7.440494 | 3.67E-07 | 3645221  |
| CUP5        | 7.438527 | 1.45E-08 | 3635174  |
| MNN26       | 7.418743 | 1.55E-07 | 3646240  |
| GLO3        | 7.410495 | 1.9E-11  | 3640556  |
| AGE3        | 7.393084 | 1.6E-07  | 3644565  |
| SUB2        | 7.361759 | 8.33E-11 | 3645033  |
| C4_03050C_A | 7.339626 | 1.23E-05 | 3637930  |
| C1_01080W_A | 7.332162 | 0.032322 | 3640173  |
| UGA32       | 7.331749 | 0.001271 | 3639333  |
| NIF3        | 7.321516 | 8.6E-05  | 3646527  |
| LMO1        | 7.296223 | 4.14E-09 | 3641403  |
| C7_01320W_A | 7.292332 | 4.07E-07 | 3645896  |
| C4_05730W_A | 7.282043 | 0.037015 | 3641805  |
| ARG2        | 7.265348 | 0.000202 | 3647533  |
| NHP6A       | 7.263212 | 9.82E-10 | 30515244 |
| C4_04600C_A | 7.256836 | 0.004796 | 3641156  |
| HHF1        | 7.241544 | 5.63E-07 | 3644705  |
| C6_01960W_A | 7.226764 | 0.001027 | 3644559  |
| RBT1        | 7.225285 | 0.00273  | 3645377  |
| APM4        | 7.210953 | 0.001089 | 3642297  |
| SEC72       | 7.196325 | 5.52E-06 | 3645768  |
| CDC7        | 7.157702 | 1.51E-05 | 3643424  |
| C2_05800C_A | 7.144016 | 7.45E-07 | 3645584  |
| STE13       | 7.142128 | 2.07E-05 | 3647597  |
| CR_07170W_A | 7.139577 | 1.1E-06  | 3645271  |
| C4_02420C_A | 7.101891 | 0.033667 | 3637849  |
| TRX1        | 7.099601 | 3.62E-08 | 3638950  |
| C1_01800W_A | 7.090705 | 0.005165 | 3645407  |
| C4_04090C_A | 7.084619 | 8.78E-06 | 3641225  |
| C4_06810C_A | 7.073923 | 3.66E-10 | 3642916  |
| GIN1        | 7.064587 | 0.000429 | 3644539  |
| TYR1        | 7.041527 | 8.56E-06 | 3635639  |

|             |          |          |         |
|-------------|----------|----------|---------|
| AIP2        | 7.006166 | 8.95E-10 | 3638393 |
| APM1        | 7.005744 | 5.27E-07 | 3636424 |
| SPF1        | 6.990776 | 2.1E-10  | 3646573 |
| C4_01840C_A | 6.986762 | 5.6E-05  | 3635592 |
| CR_00710C_A | 6.98606  | 0.036884 | 3640440 |
| C7_01740C_A | 6.939064 | 0.000266 | 3637010 |
| C1_09020W_A | 6.937987 | 9.27E-05 | 3634917 |
| C6_03950C_A | 6.928372 | 0.000512 | 3640268 |
| C2_05850C_A | 6.927677 | 7.86E-06 | 3647472 |
| CR_08610W_A | 6.920742 | 9.37E-05 | 3642109 |
| PRO3        | 6.913997 | 1.1E-08  | 3645036 |
| C1_05990C_A | 6.904218 | 0.000418 | 3639871 |
| C1_11740W_A | 6.890458 | 0.001404 | 3645317 |
| MAE1        | 6.866658 | 2.83E-09 | 3641615 |
| ARP3        | 6.84482  | 1.28E-07 | 3643479 |
| SAH1        | 6.831    | 1.86E-12 | 3636452 |
| ALG6        | 6.82563  | 0.000111 | 3647316 |
| ILV1        | 6.818384 | 7.17E-09 | 3646918 |
| NIT3        | 6.816891 | 1.77E-06 | 3644408 |
| C7_00600C_A | 6.813585 | 0.000345 | 3638031 |
| CR_07080W_A | 6.808797 | 1.41E-08 | 3647964 |
| C2_06270W_A | 6.804393 | 0.269801 | 3646921 |
| C6_04280W_A | 6.80146  | 1.13E-06 | 3646279 |
| RPS7A       | 6.777799 | 3.21E-09 | 3636573 |
| C2_07270W_A | 6.776599 | 8.9E-06  | 3643474 |
| C5_00060C_A | 6.772621 | 0.000101 | 3647889 |
| HNT2        | 6.751383 | 0.03953  | 3642271 |
| SMP3        | 6.74839  | 0.041517 | 3642980 |
| ILV3        | 6.73848  | 6.26E-11 | 3636428 |
| ATP5        | 6.710766 | 3.35E-10 | 3640521 |
| VMA5        | 6.703852 | 1.84E-05 | 3642316 |
| IFA21       | 6.700315 | 0.000435 | 3641344 |
| NUO1        | 6.690364 | 3.29E-05 | 3647100 |
| SAS2        | 6.689914 | 0.006785 | 3638817 |
| PHO84       | 6.661232 | 0.000113 | 3645348 |
| C2_02260W_A | 6.636304 | 4.5E-05  | 3635778 |
| C5_04950C_A | 6.634084 | 0.000104 | 3636422 |
| QCR7        | 6.623472 | 1.73E-05 | 3639233 |
| GVP36       | 6.594524 | 0.0001   | 3641772 |
| C4_05080C_A | 6.581638 | 0.000154 | 3641129 |
| RK11        | 6.57924  | 0.008027 | 3636574 |
| C1_01210W_A | 6.561873 | 0.000545 | 3640209 |
| YBL053      | 6.530374 | 0.000119 | 3647045 |
| C2_06950C_A | 6.527558 | 0.00223  | 3643527 |
| C3_00470W_A | 6.512487 | 1.81E-06 | 3640520 |
| C1_07340W_A | 6.508717 | 5.24E-09 | 3644472 |
| C2_03450W_A | 6.506118 | 0.000359 | 3637349 |

|             |          |          |         |
|-------------|----------|----------|---------|
| ADO1        | 6.460215 | 1.73E-08 | 3639274 |
| SEC26       | 6.454165 | 6.61E-10 | 3641005 |
| YBN5        | 6.447001 | 1.72E-09 | 3644781 |
| CR_00870C_A | 6.438188 | 0.049285 | 3640398 |
| CR_05760C_A | 6.421931 | 0.008081 | 3646695 |
| C4_06160W_A | 6.420655 | 0.008256 | 3642819 |
| PET9        | 6.415708 | 7.69E-11 | 3641587 |
| C7_02100W_A | 6.382214 | 1.89E-08 | 3637023 |
| C5_05040W_A | 6.365587 | 0.000433 | 3636488 |
| C3_03510C_A | 6.365163 | 2.97E-05 | 3638310 |
| YHB5        | 6.357313 | 1.7E-06  | 3647343 |
| C2_00730C_A | 6.350564 | 1.76E-05 | 3638913 |
| C1_11280W_A | 6.335701 | 1.8E-05  | 3644554 |
| CAK1        | 6.312772 | 0.000116 | 3637352 |
| VAS1        | 6.309483 | 1.3E-10  | 3648340 |
| RNH35       | 6.303539 | 0.048752 | 3636987 |
| C3_05880C_A | 6.300741 | 1.85E-08 | 3641737 |
| C2_02090W_A | 6.295846 | 9.16E-05 | 3635854 |
| DUN1        | 6.29213  | 0.002502 | 3636494 |
| SEC24       | 6.290881 | 5E-11    | 3634939 |
| VMA8        | 6.280749 | 1.27E-05 | 3642798 |
| CR_01080W_A | 6.271585 | 1.86E-08 | 3640381 |
| INO1        | 6.25158  | 3.62E-11 | 3638966 |
| FRE30       | 6.239456 | 7.22E-08 | 3646025 |
| C1_13270W_A | 6.21854  | 0.000249 | 3636144 |
| C7_02920W_A | 6.179736 | 0.000193 | 3641391 |
| C2_09180W_A | 6.175978 | 0.049547 | 3644092 |
| RIP1        | 6.16901  | 1.01E-09 | 3635204 |
| POL3        | 6.153346 | 3.86E-06 | 3641359 |
| C2_05130W_A | 6.152908 | 0.000757 | 3643458 |
| C1_10540C_A | 6.15212  | 0.000766 | 3647193 |
| VMA11       | 6.148575 | 0.000751 | 3637054 |
| TPD3        | 6.146478 | 9.43E-08 | 3638512 |
| CR_09010C_A | 6.114437 | 3.55E-09 | 3641892 |
| KIP3        | 6.10957  | 0.000854 | 3641716 |
| C3_01720C_A | 6.105729 | 7.73E-10 | 3636601 |
| HBR2        | 6.097537 | 1.08E-09 | 3646273 |
| CRN1        | 6.083763 | 8.59E-08 | 3637034 |
| RPL10A      | 6.053539 | 1.79E-10 | 3645868 |
| C2_02310W_A | 6.052685 | 2.66E-05 | 3635809 |
| PMR1        | 6.052003 | 2.01E-08 | 3638043 |
| CR_08000C_A | 6.047339 | 7.56E-09 | 3644150 |
| C1_11760C_A | 6.040944 | 0.000865 | 3645328 |
| HGT10       | 6.030827 | 2.39E-05 | 3640309 |
| PUP2        | 6.027624 | 5.68E-08 | 3646617 |
| RPP1B       | 6.019769 | 6.8E-09  | 3643104 |
| CR_05200C_A | 6.011023 | 0.001509 | 3648080 |

|             |          |          |          |
|-------------|----------|----------|----------|
| FRE7        | 6.005746 | 4.84E-08 | 3646024  |
| C5_04410C_A | 6.001958 | 0.003437 | 3636410  |
| FTR2        | 5.998181 | 3.8E-06  | 3643303  |
| ARE2        | 5.978174 | 1.54E-06 | 3643526  |
| C4_03400W_A | 5.958391 | 0.012282 | 30515256 |
| NUC2        | 5.941332 | 3.87E-08 | 3637030  |
| CR_02630C_A | 5.938291 | 0.052872 | 3642568  |
| ERG10       | 5.907373 | 7.57E-08 | 3648275  |
| HTA3        | 5.891741 | 0.001676 | 3638322  |
| DOT1        | 5.881604 | 3.65E-05 | 3642236  |
| TPM2        | 5.876837 | 1.04E-07 | 30515441 |
| ATP17       | 5.842354 | 1.53E-07 | 30515364 |
| CR_09670C_A | 5.834776 | 2.11E-05 | 3647091  |
| RPP1A       | 5.831991 | 1.31E-09 | 3636839  |
| C3_01020W_A | 5.824862 | 0.013766 | 3639828  |
| SHM1        | 5.824039 | 1.81E-09 | 3646724  |
| C4_00380W_A | 5.824005 | 0.000389 | 3645015  |
| KSR1        | 5.822609 | 0.001381 | 3646052  |
| C5_01410C_A | 5.81772  | 1.69E-05 | 3647054  |
| APT1        | 5.809779 | 1.69E-05 | 3635842  |
| GIT2        | 5.807191 | 1.3E-05  | 3642633  |
| IFA4        | 5.777697 | 0.015492 | 3645454  |
| CR_07600W_A | 5.773915 | 1.89E-06 | 3644849  |
| RPS1        | 5.773699 | 2.5E-10  | 3636924  |
| ATP4        | 5.768569 | 9.15E-10 | 3643418  |
| CR_08670C_A | 5.762241 | 0.001476 | 3642126  |
| HEM15       | 5.757403 | 3.79E-08 | 3645211  |
| C4_06460C_A | 5.755404 | 0.015078 | 3642791  |
| STE24       | 5.753352 | 3.89E-08 | 3645040  |
| C4_00770C_A | 5.716491 | 5.75E-05 | 3645760  |
| WBP1        | 5.71607  | 3.25E-08 | 3644398  |
| RPS27A      | 5.714142 | 0.003685 | 30514993 |
| C1_12240C_A | 5.703963 | 0.000128 | 3642023  |
| MNN2        | 5.703786 | 2.68E-05 | 3644405  |
| MAM33       | 5.681036 | 4.29E-07 | 3643103  |
| MSM1        | 5.671003 | 0.003805 | 3636398  |
| NPT1        | 5.6678   | 1.73E-06 | 3643109  |
| C1_08800W_A | 5.651955 | 7.43E-05 | 3634791  |
| FAT1        | 5.639984 | 1.48E-07 | 3647083  |
| C5_04550W_A | 5.635055 | 0.003609 | 3636508  |
| SNF5        | 5.630133 | 0.000151 | 3648297  |
| PEX11       | 5.628035 | 0.001735 | 3646288  |
| C4_01470W_A | 5.626584 | 0.017205 | 3635621  |
| C4_05310W_A | 5.624535 | 0.016766 | 3646958  |
| DPP2        | 5.622647 | 0.016936 | 3645341  |
| C4_03770W_A | 5.622286 | 0.016706 | 3645354  |
| BMH1        | 5.620237 | 3.52E-10 | 3636810  |

|             |          |          |          |
|-------------|----------|----------|----------|
| ESC4        | 5.619737 | 0.017926 | 3635727  |
| BNR1        | 5.6148   | 8.54E-05 | 3639672  |
| C6_02470W_A | 5.603728 | 1.52E-06 | 3639169  |
| C7_01460C_A | 5.584913 | 0.004111 | 3636958  |
| MYO1        | 5.583055 | 1.82E-05 | 3647248  |
| C1_05490C_A | 5.574961 | 2.55E-05 | 3642507  |
| DPB2        | 5.571733 | 0.001592 | 3639026  |
| C1_12180C_A | 5.564242 | 0.005614 | 3642038  |
| ZCF24       | 5.53244  | 0.001705 | 3645417  |
| CR_06070W_A | 5.529448 | 3.84E-05 | 3644840  |
| C1_01250W_A | 5.516032 | 4.5E-05  | 3640212  |
| DAP1        | 5.506948 | 0.004944 | 3641021  |
| CR_07110C_A | 5.486048 | 0.01761  | 3648224  |
| SEC34       | 5.472538 | 9.36E-07 | 3644455  |
| RPL19A      | 5.467882 | 6.11E-10 | 3635257  |
| FGR34       | 5.445887 | 1.17E-05 | 3639033  |
| C1_01050C_A | 5.439976 | 7.41E-06 | 3640170  |
| PHO89       | 5.435585 | 3.68E-08 | 3635633  |
| C1_00210C_A | 5.435489 | 4.76E-08 | 3639335  |
| CR_00910W_A | 5.434142 | 9.76E-08 | 30515371 |
| C6_01750C_A | 5.41842  | 0.019331 | 3641640  |
| VPS1        | 5.410306 | 4.98E-08 | 3642656  |
| CR_04880W_A | 5.382258 | 0.002102 | 3647309  |
| ERG12       | 5.368015 | 2.17E-05 | 3634859  |
| ATP14       | 5.363392 | 1.82E-07 | 30515134 |
| RHO1        | 5.361425 | 2.31E-08 | 3642564  |
| C1_02890C_A | 5.353836 | 0.019183 | 3636867  |
| C1_01290C_A | 5.35242  | 0.01971  | 3640184  |
| RNH1        | 5.344427 | 3.39E-05 | 3639237  |
| BAT21       | 5.326892 | 3.85E-08 | 3637356  |
| C5_01590W_A | 5.316898 | 0.002023 | 3647041  |
| C3_04780C_A | 5.308278 | 4.55E-05 | 3635214  |
| NAM2        | 5.302605 | 0.000215 | 3640275  |
| RPL18       | 5.299763 | 3.67E-08 | 3635156  |
| PRD1        | 5.298716 | 1.37E-08 | 3642471  |
| CR_03560W_A | 5.290111 | 0.020532 | 3643217  |
| MSH2        | 5.288046 | 1.72E-05 | 3642939  |
| C1_14240W_A | 5.279649 | 2.81E-06 | 3643306  |
| PMS1        | 5.275261 | 0.006994 | 3647714  |
| ATP7        | 5.272535 | 1.23E-06 | 3646672  |
| C1_00630W_A | 5.245818 | 0.000659 | 3639380  |
| MSI3        | 5.240144 | 2.22E-09 | 3639821  |
| POL2        | 5.233839 | 3.53E-06 | 3645733  |
| CR_07350W_A | 5.228175 | 1.28E-08 | 3646055  |
| RPS8A       | 5.219429 | 7.86E-10 | 3645565  |
| DNM1        | 5.217753 | 1.02E-07 | 3643673  |
| BIO32       | 5.215862 | 0.005921 | 3643430  |

|             |          |          |          |
|-------------|----------|----------|----------|
| SMF3        | 5.210898 | 3.6E-05  | 3638852  |
| C5_04150C_A | 5.210202 | 0.006115 | 3636525  |
| RFC4        | 5.206125 | 0.00032  | 3638994  |
| C4_01730C_A | 5.19266  | 3.63E-06 | 3635588  |
| C3_07820W_A | 5.181889 | 0.000908 | 3647463  |
| CR_00060C_A | 5.162645 | 2.96E-06 | 3639673  |
| C6_03960W_A | 5.162412 | 6.8E-07  | 3640269  |
| C2_03170W_A | 5.155861 | 0.021591 | 3642988  |
| GLO2        | 5.154075 | 0.000418 | 3644067  |
| C6_00930C_A | 5.138709 | 7.7E-05  | 3644032  |
| RDI1        | 5.133885 | 5.59E-07 | 3635167  |
| C4_04180C_A | 5.12665  | 0.005424 | 3641183  |
| CSR1        | 5.126583 | 0.007696 | 3641162  |
| PMT6        | 5.124051 | 5.01E-07 | 3641116  |
| LSP1        | 5.120179 | 1.46E-07 | 3648025  |
| SNL1        | 5.104261 | 8.49E-05 | 3647192  |
| C3_04970C_A | 5.097223 | 5.39E-07 | 3635164  |
| CR_04870C_A | 5.095471 | 0.0318   | 3647310  |
| RPL28       | 5.093557 | 1.21E-09 | 30515386 |
| MET3        | 5.088954 | 5.03E-08 | 3636132  |
| C2_09250W_A | 5.086846 | 0.022275 | 3644065  |
| C5_03950W_A | 5.083765 | 0.000943 | 3647445  |
| END3        | 5.065069 | 9.16E-05 | 3636644  |
| HFL2        | 5.059892 | 0.001147 | 3637833  |
| C3_06610W_A | 5.059    | 0.000553 | 3642248  |
| C4_05250W_A | 5.047525 | 0.009893 | 3646158  |
| CR_10140W_A | 5.04611  | 6.64E-08 | 3638972  |
| MNN10       | 5.044683 | 3.88E-05 | 3644997  |
| C1_14060W_A | 5.042761 | 4.7E-05  | 3643344  |
| CYK3        | 5.037869 | 0.007496 | 3639539  |
| TOM22       | 5.031839 | 6.47E-05 | 3647650  |
| C1_12400C_A | 5.027137 | 0.003646 | 3642059  |
| CAM1        | 5.007525 | 2.31E-08 | 3641734  |
| C1_07820W_A | 4.999662 | 0.007808 | 3640735  |
| C1_12070C_A | 4.997897 | 0.000469 | 3642025  |
| SHP1        | 4.996628 | 1.1E-07  | 3640083  |
| CAT8        | 4.975888 | 0.00012  | 3640745  |
| ATF1        | 4.973109 | 1.63E-06 | 3635273  |
| C6_03330C_A | 4.970806 | 0.000246 | 3639199  |
| C1_00450C_A | 4.969091 | 0.00021  | 30514955 |
| RAD10       | 4.967398 | 0.008079 | 3639884  |
| NDH51       | 4.964949 | 2.25E-08 | 3645444  |
| C3_04740C_A | 4.961065 | 0.007977 | 3635251  |
| APN1        | 4.957225 | 0.000156 | 3642263  |
| C2_04830W_A | 4.95617  | 0.023196 | 3648115  |
| MNN24       | 4.955806 | 6.83E-06 | 3638789  |
| C2_01160W_A | 4.947681 | 0.001729 | 3638861  |

|             |          |          |          |
|-------------|----------|----------|----------|
| C1_02430C_A | 4.945734 | 1.56E-07 | 3636846  |
| RPL35       | 4.935694 | 1.79E-07 | 30515207 |
| AAT22       | 4.931903 | 0.000564 | 3635651  |
| C2_08930W_A | 4.914037 | 3.91E-06 | 3645795  |
| RPS16A      | 4.894593 | 3.89E-07 | 30514974 |
| PGA53       | 4.892495 | 0.000176 | 3635599  |
| POR1        | 4.888378 | 3.14E-09 | 3644698  |
| TIP1        | 4.885867 | 0.002017 | 3636512  |
| C2_08160C_A | 4.87292  | 1.63E-06 | 30515152 |
| SGT2        | 4.87238  | 1.77E-07 | 3642978  |
| YHM1        | 4.864402 | 4.26E-05 | 3644535  |
| C4_02040W_A | 4.857918 | 0.000699 | 3635649  |
| LAC1        | 4.852401 | 0.000995 | 3641717  |
| RPS26A      | 4.816048 | 9.8E-07  | 3635787  |
| C4_00910C_A | 4.811309 | 0.010403 | 3635679  |
| RAD7        | 4.803281 | 8.77E-05 | 3635833  |
| EFB1        | 4.797786 | 3.01E-08 | 3641125  |
| IDH2        | 4.779273 | 9.09E-08 | 3642979  |
| CR_06770C_A | 4.768241 | 0.002131 | 3647313  |
| C1_04280C_A | 4.765485 | 0.010267 | 3644709  |
| NRM1        | 4.755326 | 0.027901 | 3639343  |
| HTA1        | 4.745461 | 0.000227 | 3645658  |
| C3_05300C_A | 4.735547 | 0.004385 | 3643646  |
| C5_01550C_A | 4.726659 | 4.73E-07 | 3647063  |
| CDC50       | 4.717538 | 7.34E-05 | 3640302  |
| ACC1        | 4.717537 | 2.56E-06 | 3639688  |
| MPT5        | 4.710817 | 4.36E-05 | 3636205  |
| KGD2        | 4.707671 | 5.13E-08 | 3646036  |
| C1_05670W_A | 4.70125  | 1.56E-05 | 3639899  |
| C2_05560W_A | 4.700095 | 0.010777 | 3645561  |
| BUB1        | 4.696992 | 0.000287 | 3637922  |
| BAT22       | 4.693172 | 4.54E-07 | 3643663  |
| ERG24       | 4.692888 | 0.003427 | 3647716  |
| C1_07780W_A | 4.691811 | 5.4E-06  | 3647955  |
| C1_02910C_A | 4.688869 | 0.029948 | 3636829  |
| C2_09480W_A | 4.687665 | 0.032245 | 3643819  |
| MSC7        | 4.686602 | 0.000218 | 3645214  |
| C3_01510W_A | 4.682161 | 0.000984 | 3636571  |
| TFP1        | 4.68061  | 2.54E-07 | 3636662  |
| ARP1        | 4.652025 | 0.032692 | 3646349  |
| SSB1        | 4.650623 | 1.95E-08 | 3642095  |
| VMA7        | 4.650436 | 0.011412 | 3637332  |
| C2_06890C_A | 4.647223 | 0.041362 | 3643522  |
| RPL20B      | 4.643989 | 1.03E-06 | 3635615  |
| AOX1        | 4.643605 | 0.012741 | 3634946  |
| C1_13030C_A | 4.638471 | 5.75E-08 | 3636122  |
| C1_04090C_A | 4.630828 | 0.004964 | 3644697  |



|             |          |          |          |
|-------------|----------|----------|----------|
| C4_03720C_A | 4.627934 | 9.43E-05 | 3645359  |
| EXG2        | 4.626357 | 0.016161 | 3636816  |
| IFG3        | 4.621338 | 9.08E-06 | 3641545  |
| CR_01070W_A | 4.618047 | 0.032432 | 3640382  |
| CTA2        | 4.611751 | 2.13E-05 | 3639372  |
| C3_06410C_A | 4.60406  | 0.011892 | 3642261  |
| C6_02990W_A | 4.603132 | 0.017428 | 3639193  |
| CR_07230W_A | 4.600437 | 0.000403 | 3646031  |
| GSP1        | 4.574307 | 7.07E-08 | 3646925  |
| MVB12       | 4.572572 | 0.005731 | 30515400 |
| C1_04470C_A | 4.57209  | 0.004968 | 3646142  |
| MET14       | 4.563955 | 0.000384 | 3641547  |
| CDC47       | 4.559224 | 1.08E-05 | 3645780  |
| CDC24       | 4.552297 | 1.52E-05 | 3643737  |
| NCE103      | 4.549935 | 1.43E-06 | 3636621  |
| C5_05230C_A | 4.546426 | 8.86E-08 | 3636470  |
| C6_00910C_A | 4.537706 | 7.1E-08  | 3644030  |
| C2_09560C_A | 4.536696 | 7.29E-05 | 3643813  |
| C3_01180C_A | 4.52384  | 9.12E-06 | 3647960  |
| C3_01610W_A | 4.511429 | 1.01E-07 | 3636664  |
| C7_01480W_A | 4.506146 | 0.000864 | 3636956  |
| BMT4        | 4.503457 | 0.002834 | 3639182  |
| C3_01940C_A | 4.501519 | 0.000587 | 3636600  |
| NDE1        | 4.501024 | 8.81E-08 | 3638354  |
| FGR51       | 4.500607 | 0.0007   | 3647796  |
| PEX8        | 4.497323 | 0.005468 | 3647393  |
| C4_04280C_A | 4.495763 | 0.01412  | 3646846  |
| MON2        | 4.488257 | 2.36E-06 | 3636201  |
| C1_12060C_A | 4.488039 | 0.036594 | 3642026  |
| C1_10750C_A | 4.48697  | 0.037152 | 30515043 |
| C3_01590W_A | 4.485217 | 0.004956 | 3636666  |
| LIP8        | 4.45308  | 0.00078  | 3646727  |
| TEF1        | 4.452613 | 6.11E-08 | 3648254  |
| C1_14160W_A | 4.447252 | 0.005264 | 3643322  |
| STE23       | 4.438141 | 1.92E-05 | 3639236  |
| C2_09970C_A | 4.436596 | 2.33E-06 | 3643820  |
| GNA1        | 4.435355 | 0.00128  | 3637397  |
| C2_04330C_A | 4.432003 | 0.000204 | 3645453  |
| C7_02520W_A | 4.430914 | 0.10732  | 3636941  |
| DCC1        | 4.422291 | 0.039802 | 3638037  |
| ZCF5        | 4.421886 | 0.005918 | 3641819  |
| C4_00190W_A | 4.420791 | 0.039646 | 3645030  |
| C3_04810C_A | 4.416172 | 1.02E-08 | 30515205 |
| C5_05200C_A | 4.413677 | 0.003152 | 3636467  |
| TOM40       | 4.404223 | 2.06E-07 | 3636968  |
| C1_14530W_A | 4.399864 | 3.57E-05 | 3643333  |
| C7_02670W_A | 4.388279 | 0.001091 | 3647651  |

|             |          |          |          |
|-------------|----------|----------|----------|
| LYS21       | 4.387742 | 8.07E-07 | 3644763  |
| C1_08660C_A | 4.387578 | 0.017505 | 3634931  |
| C1_04190C_A | 4.385165 | 0.001537 | 3644717  |
| PRN4        | 4.379989 | 0.005697 | 3639877  |
| C1_06270W_A | 4.376277 | 0.004431 | 3647523  |
| C1_03490W_A | 4.367843 | 0.0003   | 3636914  |
| HIS3        | 4.366873 | 0.007017 | 3647777  |
| CTA7        | 4.362475 | 4.74E-05 | 3637776  |
| ADE5,7      | 4.360507 | 9.45E-08 | 3640719  |
| SER2        | 4.35674  | 0.000333 | 3643006  |
| HEM14       | 4.355543 | 0.000374 | 3634923  |
| CR_04560C_A | 4.340273 | 0.002082 | 3640946  |
| C3_04590W_A | 4.334837 | 1.85E-05 | 30515204 |
| ARO9        | 4.330699 | 0.003647 | 3641773  |
| MNN21       | 4.324294 | 2.23E-05 | 3648124  |
| C6_00920W_A | 4.324198 | 6.48E-05 | 3644031  |
| C7_03660C_A | 4.320427 | 6.43E-07 | 3646226  |
| C3_02820C_A | 4.316082 | 0.000535 | 3638419  |
| C3_03130C_A | 4.314512 | 0.112674 | 3638421  |
| CDC68       | 4.309045 | 3.97E-07 | 3642787  |
| HXK2        | 4.304752 | 3.37E-07 | 3641015  |
| COQ3        | 4.304635 | 0.000364 | 3641630  |
| PGA10       | 4.30172  | 0.046013 | 3645009  |
| VPS23       | 4.295362 | 0.023256 | 3644401  |
| BNI4        | 4.283886 | 8.05E-06 | 3646406  |
| C3_01900C_A | 4.280125 | 0.00234  | 3636559  |
| ANB1        | 4.277301 | 2.76E-06 | 3641648  |
| C2_10860C_A | 4.272129 | 2.84E-06 | 3641233  |
| AYR1        | 4.26939  | 0.004795 | 3647754  |
| C7_02080W_A | 4.266632 | 0.007075 | 3637025  |
| MCM3        | 4.2499   | 1.21E-05 | 3645223  |
| PDC11       | 4.240961 | 2.73E-06 | 3642780  |
| C2_01320W_A | 4.240328 | 0.000497 | 3638846  |
| C1_00330C_A | 4.237908 | 0.001849 | 3639296  |
| LAG1        | 4.237317 | 0.004489 | 3640383  |
| C1_03720C_A | 4.234242 | 0.000521 | 3648216  |
| PGA38       | 4.233899 | 0.029818 | 3637846  |
| C1_10630C_A | 4.232515 | 0.00709  | 3647683  |
| C5_02520W_A | 4.225779 | 0.012787 | 3637768  |
| RPL17B      | 4.223426 | 5E-07    | 3645439  |
| PST2        | 4.221207 | 0.035559 | 3643909  |
| AAP1        | 4.217598 | 0.020772 | 3647397  |
| C6_02030C_A | 4.217012 | 0.001295 | 3647562  |
| SHM2        | 4.216744 | 1.14E-06 | 3640306  |
| ALS1        | 4.210867 | 2.73E-07 | 3640280  |
| ERV1        | 4.19781  | 0.007647 | 30515385 |
| CR_01280C_A | 4.196714 | 0.007468 | 3640400  |

|             |          |          |          |
|-------------|----------|----------|----------|
| MUM2        | 4.196061 | 1.91E-05 | 3636432  |
| CR_03600C_A | 4.185293 | 4.5E-05  | 3643207  |
| C7_01500W_A | 4.175215 | 0.024141 | 3637050  |
| C5_03930C_A | 4.173703 | 0.022542 | 3647447  |
| CR_00290W_A | 4.173167 | 2.25E-06 | 3639717  |
| TRP5        | 4.166045 | 3.09E-06 | 3648087  |
| C1_08080C_A | 4.16352  | 0.000428 | 30515029 |
| PLC1        | 4.140614 | 0.000665 | 3647860  |
| C5_04420W_A | 4.139826 | 0.002389 | 3636411  |
| C1_08730W_A | 4.135155 | 0.021562 | 3634938  |
| C1_01950C_A | 4.133357 | 0.021649 | 3645421  |
| CRC1        | 4.097481 | 0.000697 | 3640112  |
| MMS22       | 4.087647 | 0.009052 | 3639681  |
| C4_06950W_A | 4.086793 | 0.02315  | 3642927  |
| C7_03200C_A | 4.085357 | 0.000861 | 3641342  |
| TOM70       | 4.081911 | 2.39E-07 | 3647645  |
| C3_03560W_A | 4.080071 | 0.001411 | 3638299  |
| VMA13       | 4.058947 | 2.25E-05 | 30515402 |
| C3_06970W_A | 4.054785 | 0.000114 | 3638506  |
| LRO1        | 4.05036  | 2.78E-05 | 3639356  |
| C6_02280W_A | 4.047008 | 0.000147 | 3645872  |
| C6_04560W_A | 4.045905 | 1.67E-06 | 3645977  |
| PFY1        | 4.044788 | 1.95E-06 | 3640703  |
| SEF2        | 4.034528 | 0.063617 | 3647052  |
| ROB1        | 4.032125 | 1.56E-06 | 3636212  |
| RPS3        | 4.028718 | 1.04E-05 | 3647299  |
| GWT1        | 4.015775 | 0.001651 | 3645575  |
| C2_06320W_A | 4.014908 | 9.51E-06 | 3646927  |
| CR_05480W_A | 4.010136 | 3.06E-06 | 3648238  |
| ARC19       | 4.0029   | 0.027188 | 3640418  |
| C2_05220C_A | 3.99362  | 8.98E-06 | 3643466  |
| C1_02650W_A | 3.984299 | 0.000219 | 3636818  |
| C1_10730W_A | 3.981139 | 0.000534 | 3644404  |
| TRS20       | 3.980819 | 0.065346 | 3640214  |
| OCH1        | 3.978834 | 2.23E-05 | 3641751  |
| PRP42       | 3.968508 | 0.006945 | 3643177  |
| C6_01050W_A | 3.968456 | 0.001061 | 3644015  |
| CDC60       | 3.966968 | 9.48E-08 | 3640128  |
| FRS1        | 3.962759 | 4.19E-06 | 3640121  |
| FESUR1      | 3.954206 | 1.81E-05 | 3638514  |
| C2_02950W_A | 3.951076 | 2.97E-05 | 3643012  |
| KAR9        | 3.948433 | 0.007894 | 3636136  |
| C4_02400C_A | 3.947534 | 0.029138 | 3637851  |
| ECM39       | 3.946742 | 0.001746 | 3641386  |
| ARC1        | 3.945332 | 3.52E-07 | 3645108  |
| CPR3        | 3.944596 | 3.26E-05 | 3635812  |
| MDH1        | 3.940879 | 2.37E-05 | 3639667  |

|             |          |          |          |
|-------------|----------|----------|----------|
| RAD16       | 3.934394 | 8.16E-07 | 3636874  |
| SPE2        | 3.92485  | 2.14E-06 | 3644116  |
| C1_13060C_A | 3.919966 | 1.45E-06 | 3636123  |
| PLD1        | 3.910105 | 5.09E-06 | 3645329  |
| CR_03270W_A | 3.902357 | 0.031414 | 3645101  |
| BET2        | 3.888277 | 0.001161 | 3639025  |
| C2_01930C_A | 3.88676  | 0.000154 | 3635793  |
| HHF22       | 3.883859 | 0.000952 | 3647327  |
| C1_00420W_A | 3.88146  | 0.000313 | 3639286  |
| RPS14B      | 3.881186 | 8.38E-06 | 30515006 |
| VPS51       | 3.874951 | 0.034077 | 3639242  |
| MNN9        | 3.867741 | 0.000157 | 3641735  |
| ARP9        | 3.864941 | 0.001084 | 3639829  |
| CYS4        | 3.854876 | 2.83E-06 | 3645429  |
| C6_00110C_A | 3.854356 | 0.007826 | 3647896  |
| RAD51       | 3.854121 | 0.000704 | 3644944  |
| ERG8        | 3.854108 | 0.000439 | 3635640  |
| CR_01180W_A | 3.852062 | 0.000702 | 3640427  |
| C7_00520W_A | 3.84992  | 5.05E-06 | 3638001  |
| C1_08040W_A | 3.846335 | 0.011069 | 30515028 |
| C2_10470C_A | 3.843554 | 0.000758 | 3641196  |
| CR_02260C_A | 3.838089 | 0.013232 | 3644912  |
| PIL1        | 3.832705 | 8.55E-07 | 3644769  |
| C2_00870W_A | 3.831519 | 0.008803 | 3638804  |
| PDS5        | 3.82787  | 0.000785 | 3642341  |
| TLO9        | 3.822263 | 0.000289 | 3648051  |
| BUD7        | 3.81884  | 3.48E-06 | 3647228  |
| YMC1        | 3.817161 | 0.00075  | 3644474  |
| C4_05850C_A | 3.812608 | 0.001702 | 3641791  |
| CDC73       | 3.812538 | 0.000185 | 3636830  |
| GOR1        | 3.809375 | 0.000922 | 3636836  |
| C6_02530C_A | 3.807826 | 0.032127 | 3639175  |
| MMD1        | 3.783974 | 0.000174 | 30515015 |
| RPP0        | 3.777615 | 1.76E-06 | 3638023  |
| ERG9        | 3.776704 | 7.74E-05 | 3643913  |
| PIKA        | 3.764413 | 3.17E-05 | 3643765  |
| BTS1        | 3.763734 | 0.008004 | 3646982  |
| C6_00340C_A | 3.763654 | 9.52E-05 | 3646074  |
| HOC1        | 3.759598 | 0.000192 | 3641605  |
| CR_01260W_A | 3.751987 | 0.001378 | 3640402  |
| AAT21       | 3.746138 | 5.4E-06  | 3647241  |
| RFC1        | 3.745851 | 1.05E-05 | 3645582  |
| MP65        | 3.740646 | 2.8E-06  | 3643951  |
| HXT5        | 3.740353 | 0.005733 | 3643209  |
| HIS4        | 3.73414  | 1.91E-06 | 3645025  |
| C2_09620W_A | 3.732609 | 0.000811 | 3643797  |
| EIF4E       | 3.730925 | 4.95E-06 | 3638981  |

|             |          |          |          |
|-------------|----------|----------|----------|
| TIP20       | 3.730295 | 6.63E-06 | 3636457  |
| RTS1        | 3.728672 | 4.99E-06 | 3646557  |
| CR_05900W_A | 3.728265 | 0.015416 | 3646681  |
| PAN3        | 3.720838 | 0.000513 | 3636464  |
| CR_02410W_A | 3.71763  | 0.001056 | 3644928  |
| KRS1        | 3.71744  | 1.28E-05 | 3638486  |
| HYU1        | 3.70941  | 0.000324 | 3643024  |
| RPS30       | 3.68612  | 1.37E-05 | 30515390 |
| C3_07630C_A | 3.681509 | 9.58E-05 | 3638491  |
| ESP1        | 3.680417 | 0.010115 | 3640197  |
| SDH12       | 3.678591 | 2.6E-05  | 3642775  |
| C6_03470W_A | 3.676651 | 0.00023  | 3640253  |
| MED1        | 3.674306 | 0.000936 | 3637418  |
| RPL13       | 3.663819 | 1.01E-06 | 3636841  |
| C3_05510W_A | 3.652406 | 0.018911 | 3643672  |
| ZRT2        | 3.64588  | 0.001438 | 3635861  |
| CR_09510C_A | 3.644233 | 0.000288 | 3647105  |
| C1_14170W_A | 3.639191 | 6.91E-06 | 3643323  |
| CHS2        | 3.638366 | 9.75E-05 | 3641893  |
| ARP2        | 3.634778 | 2.72E-06 | 3641915  |
| RNR21       | 3.628318 | 1.96E-06 | 3643021  |
| C1_00920W_A | 3.628106 | 0.000224 | 3639283  |
| C3_00310C_A | 3.624626 | 0.003954 | 3640523  |
| CHS6        | 3.622102 | 0.002325 | 3641377  |
| C4_06670W_A | 3.621136 | 0.019298 | 3642951  |
| UBI3        | 3.612052 | 3.93E-06 | 3642934  |
| SIM1        | 3.610087 | 5.44E-05 | 3636185  |
| C5_04900C_A | 3.586433 | 0.001276 | 3636416  |
| C6_03580W_A | 3.583966 | 0.019164 | 3640250  |
| HEM13       | 3.583916 | 2.23E-05 | 3647390  |
| GYP1        | 3.574052 | 6.51E-05 | 3641138  |
| C2_09930W_A | 3.573321 | 0.000252 | 3643824  |
| C4_05340W_A | 3.570937 | 0.002039 | 3646947  |
| C7_00150W_A | 3.567895 | 1.8E-05  | 3637973  |
| GLO1        | 3.566465 | 0.002838 | 3639312  |
| FAS1        | 3.56429  | 6.11E-05 | 3641593  |
| C4_04390W_A | 3.562975 | 1.16E-05 | 30515267 |
| MRPL6       | 3.562387 | 0.002181 | 3639724  |
| YST1        | 3.560831 | 9.27E-07 | 3643678  |
| C7_03260C_A | 3.560223 | 0.010734 | 3641366  |
| BRN1        | 3.553454 | 0.005935 | 3641815  |
| SLC1        | 3.545476 | 0.000564 | 3638324  |
| C3_04420W_A | 3.539542 | 0.000158 | 3635180  |
| RPL6        | 3.535066 | 5.22E-05 | 30514975 |
| C5_00340W_A | 3.531143 | 0.011841 | 3641555  |
| AHP2        | 3.5244   | 0.009361 | 3636977  |
| CR_01430W_A | 3.522625 | 0.040886 | 3640138  |

|             |          |          |          |
|-------------|----------|----------|----------|
| CR_00690C_A | 3.50663  | 0.013286 | 3640390  |
| CR_05880W_A | 3.505061 | 0.022832 | 3646702  |
| C1_03540C_A | 3.501426 | 0.043845 | 3636920  |
| YHM2        | 3.494803 | 0.000152 | 3647137  |
| C3_05010C_A | 3.489422 | 0.003179 | 3635169  |
| TOM6        | 3.489247 | 0.044304 | 3636596  |
| MAK32       | 3.488805 | 0.043491 | 3645411  |
| C5_02050W_A | 3.485265 | 1.73E-05 | 3643768  |
| URA4        | 3.477022 | 0.000642 | 3642632  |
| C3_04080W_A | 3.474759 | 5.3E-05  | 30515200 |
| C5_04770W_A | 3.472577 | 0.011179 | 3636444  |
| DPP3        | 3.471498 | 0.023173 | 3636942  |
| CR_03530W_A | 3.470014 | 1.74E-05 | 3643204  |
| C1_02510W_A | 3.46725  | 0.01203  | 3636796  |
| RCK2        | 3.464862 | 5.7E-06  | 3643507  |
| CSH1        | 3.464282 | 0.002965 | 3646427  |
| C2_04990W_A | 3.460822 | 0.044185 | 3643445  |
| ALA1        | 3.458746 | 3.84E-05 | 3640285  |
| C2_07190C_A | 3.454371 | 0.000493 | 3643513  |
| CMK2        | 3.452694 | 0.000694 | 3643961  |
| C1_01010W_A | 3.450756 | 0.001653 | 3640181  |
| YBP1        | 3.450135 | 0.000115 | 3636187  |
| MAC1        | 3.449067 | 0.001126 | 3637985  |
| ERG5        | 3.438774 | 1.96E-06 | 3641400  |
| C3_04460W_A | 3.429521 | 0.000793 | 3635208  |
| VCX1        | 3.425645 | 0.006577 | 3646508  |
| MDL1        | 3.40938  | 9.13E-05 | 3640146  |
| C2_04160W_A | 3.401044 | 0.013342 | 3637331  |
| CR_05140W_A | 3.392283 | 0.020198 | 3646400  |
| TIF5        | 3.39056  | 0.000102 | 3637765  |
| C1_01000C_A | 3.385295 | 0.014793 | 3640180  |
| ERD1        | 3.384828 | 0.044082 | 3640723  |
| CR_03460W_A | 3.38104  | 0.001835 | 3643213  |
| COQ5        | 3.37918  | 0.000566 | 3643416  |
| GAL4        | 3.379079 | 1.29E-05 | 3641244  |
| ACO1        | 3.369962 | 0.000176 | 3642090  |
| CR_05450C_A | 3.36932  | 0.014495 | 3648236  |
| C7_03160W_A | 3.359386 | 0.000146 | 3641345  |
| C2_05170W_A | 3.355194 | 0.013052 | 3643462  |
| CR_02690W_A | 3.352506 | 0.018285 | 3642574  |
| C3_02390W_A | 3.351438 | 0.013611 | 3636615  |
| RPL37B      | 3.350947 | 7.21E-05 | 30515053 |
| CYT2        | 3.341647 | 0.031568 | 3635671  |
| CR_09590W_A | 3.340659 | 0.007908 | 3647095  |
| TUF1        | 3.339475 | 7.62E-05 | 3639360  |
| DPS1-1      | 3.33786  | 2.05E-05 | 3645134  |
| C2_03910C_A | 3.33051  | 0.001674 | 3637426  |

|             |          |          |          |
|-------------|----------|----------|----------|
| GDA1        | 3.319883 | 2.21E-05 | 3641762  |
| ZCF39       | 3.313445 | 4.81E-05 | 3639037  |
| ATP20       | 3.310306 | 0.001279 | 3647602  |
| C1_03440C_A | 3.302297 | 0.00054  | 3636908  |
| CR_09070C_A | 3.302244 | 0.000652 | 3641926  |
| C5_02110W_A | 3.300633 | 0.000189 | 3637732  |
| RPS13       | 3.299722 | 4.5E-05  | 30515328 |
| CHS7        | 3.299517 | 0.003065 | 3639869  |
| C1_07100C_A | 3.297843 | 0.017232 | 3639487  |
| APS3        | 3.29633  | 0.016006 | 3646491  |
| RPS5        | 3.294639 | 5.6E-06  | 3637700  |
| C1_09470C_A | 3.28622  | 0.001167 | 3634761  |
| C2_10830W_A | 3.285146 | 0.102849 | 30515170 |
| RBD1        | 3.284223 | 0.000227 | 3642018  |
| CTA24       | 3.283995 | 2.53E-05 | 3636475  |
| ERG27       | 3.28323  | 0.00202  | 3640432  |
| FGR38       | 3.27623  | 0.005153 | 3645412  |
| SUN41       | 3.274505 | 2.72E-05 | 3647067  |
| OPT6        | 3.274287 | 0.004974 | 3635603  |
| CR_02570C_A | 3.26805  | 0.017368 | 3647685  |
| GPI7        | 3.264667 | 0.017845 | 3647672  |
| ARL3        | 3.261618 | 0.004607 | 3644397  |
| IRR1        | 3.261295 | 0.000897 | 3643305  |
| C3_07450C_A | 3.259387 | 0.035763 | 3638481  |
| C1_08490W_A | 3.258776 | 0.000147 | 3646492  |
| CR_06520C_A | 3.257787 | 0.016991 | 3645263  |
| CDC13       | 3.249459 | 0.006258 | 3639293  |
| DNA2        | 3.247889 | 0.003701 | 3646072  |
| C2_04370W_A | 3.246169 | 0.000175 | 3645460  |
| CR_02770C_A | 3.245864 | 0.004678 | 3642581  |
| C5_00750C_A | 3.240642 | 0.000171 | 3644121  |
| C4_04330C_A | 3.239013 | 4.79E-05 | 3646840  |
| TRP2        | 3.235336 | 2.97E-05 | 3640079  |
| MDH1-3      | 3.232853 | 0.000983 | 3641197  |
| C4_00590C_A | 3.229378 | 7.22E-05 | 3645772  |
| RPP2B       | 3.223054 | 1.95E-05 | 3635195  |
| C7_00230W_A | 3.221883 | 0.036493 | 3637982  |
| C1_08780W_A | 3.217749 | 0.000272 | 3634789  |
| RPL2        | 3.215534 | 1.51E-05 | 30515049 |
| C1_02780W_A | 3.214981 | 0.004538 | 3636871  |
| C6_01370W_A | 3.209379 | 0.002294 | 3641607  |
| YSA1        | 3.198908 | 0.011735 | 3638516  |
| PHB1        | 3.198616 | 0.001307 | 3645641  |
| ANP1        | 3.194466 | 0.001802 | 3643917  |
| C3_03840C_A | 3.19241  | 0.002794 | 3645628  |
| RPL5        | 3.185517 | 1.43E-05 | 3637057  |
| C1_07440W_A | 3.180409 | 0.000189 | 3644482  |

|             |          |          |          |
|-------------|----------|----------|----------|
| C5_00280C_A | 3.180361 | 0.003566 | 3641581  |
| C3_01140W_A | 3.174044 | 0.013367 | 3639902  |
| C2_06920C_A | 3.169995 | 0.025562 | 3643524  |
| PHO88       | 3.168647 | 0.001773 | 3641898  |
| C1_04970W_A | 3.167566 | 1.03E-05 | 3647528  |
| C3_04630W_A | 3.166121 | 0.015865 | 3635189  |
| C1_02370C_A | 3.165056 | 0.018667 | 3644576  |
| RPB11       | 3.159856 | 0.045991 | 30514957 |
| EFT2        | 3.157148 | 3.62E-05 | 3642998  |
| C2_07980W_A | 3.153167 | 0.024819 | 3642312  |
| PGA54       | 3.151548 | 0.00237  | 3637929  |
| C1_13280C_A | 3.147795 | 0.007244 | 3636145  |
| RPS4A       | 3.134988 | 2.14E-05 | 3641247  |
| C7_03050W_A | 3.133759 | 0.012496 | 3641378  |
| PNP1        | 3.133063 | 0.000501 | 3638426  |
| C1_01360C_A | 3.1301   | 0.000214 | 3640191  |
| C1_09750W_A | 3.129407 | 0.002794 | 3634822  |
| MCI4        | 3.129036 | 0.002166 | 3640118  |
| C1_09430W_A | 3.119536 | 0.000202 | 3634855  |
| CR_08130W_A | 3.116227 | 0.002762 | 3642070  |
| CLA4        | 3.113638 | 0.001011 | 3634878  |
| HOG1        | 3.112493 | 1.12E-05 | 3637393  |
| CPY1        | 3.103897 | 0.000111 | 3646721  |
| ALG11       | 3.102304 | 0.026254 | 3645871  |
| C5_04710W_A | 3.101258 | 0.017294 | 3636517  |
| YKU80       | 3.097826 | 0.016507 | 3645138  |
| C4_00330C_A | 3.097421 | 0.000853 | 30515227 |
| C4_02470C_A | 3.095738 | 0.00104  | 3637869  |
| C5_02750C_A | 3.095547 | 0.001735 | 3637740  |
| FEN12       | 3.090042 | 0.002333 | 3637404  |
| PSY2        | 3.089514 | 0.008908 | 3644567  |
| C1_04580C_A | 3.087543 | 0.014262 | 3646132  |
| C2_05050C_A | 3.085639 | 0.01156  | 3643450  |
| C3_04130W_A | 3.083076 | 0.000296 | 3635283  |
| C6_04060W_A | 3.082914 | 0.000896 | 3647828  |
| C1_06200W_A | 3.079636 | 0.004152 | 3648300  |
| ORC3        | 3.077169 | 0.006489 | 3645639  |
| C1_00830W_A | 3.076858 | 0.046656 | 3639344  |
| PXA2        | 3.07407  | 0.000485 | 3642055  |
| GCN4        | 3.072249 | 0.000166 | 3643823  |
| GLR1        | 3.07095  | 0.000356 | 3647061  |
| C2_07080C_A | 3.06278  | 0.028074 | 3643502  |
| YPD1        | 3.062441 | 0.00178  | 3644458  |
| C2_03700W_A | 3.062381 | 0.025476 | 3637375  |
| EMP70       | 3.059971 | 0.000249 | 3637919  |
| C4_05640C_A | 3.056188 | 0.033158 | 3641813  |
| COX6        | 3.05549  | 5.24E-05 | 30515099 |



|             |          |          |          |
|-------------|----------|----------|----------|
| GPD2        | 3.051862 | 7.42E-05 | 3644563  |
| CR_09990W_A | 3.046132 | 0.002172 | 3638930  |
| AXL2        | 3.042416 | 0.001236 | 3641184  |
| SRO77       | 3.041615 | 1.94E-05 | 3646088  |
| RPL32       | 3.039298 | 0.000363 | 30515335 |
| RPL11       | 3.037509 | 0.000256 | 3643489  |
| ABP1        | 3.034901 | 7.26E-05 | 3637875  |
| USO1        | 3.032723 | 2.02E-05 | 3648280  |
| SEC4        | 3.028425 | 7.41E-05 | 3640119  |
| CR_02620C_A | 3.026612 | 0.004176 | 3642567  |
| TLO1        | 3.025507 | 0.002585 | 3639677  |
| MDM10       | 3.023897 | 0.016091 | 3647778  |
| C1_05720W_A | 3.022764 | 3.41E-05 | 30515000 |
| HSP12       | 3.022458 | 0.000521 | 3643745  |
| CLB2        | 3.019298 | 0.001767 | 3635840  |
| ADH2        | 3.018707 | 0.000223 | 3640751  |
| C3_00790W_A | 3.015354 | 0.019041 | 3648186  |
| C6_00270W_A | 3.013582 | 0.012242 | 3646066  |
| C3_02570W_A | 3.011199 | 0.004957 | 3638375  |
| RPL25       | 3.008792 | 0.000185 | 30515338 |
| CTF18       | 3.005916 | 0.004424 | 3640431  |
| HYS2        | 3.004714 | 0.004838 | 3636441  |
| C3_06690C_A | 3.000863 | 0.028333 | 3642256  |
| C2_10230W_A | 2.99539  | 0.007917 | 3643925  |
| PEX3        | 2.995247 | 0.006309 | 3644484  |
| URA5        | 2.98942  | 0.013176 | 3640087  |
| FAA21       | 2.978081 | 0.003097 | 3638418  |
| RNA1        | 2.971207 | 0.000328 | 3636595  |
| ASC1        | 2.969927 | 0.000123 | 3645907  |
| PST1        | 2.969469 | 0.008348 | 3643520  |
| CR_01700C_A | 2.969384 | 0.003092 | 3640129  |
| SWC4        | 2.968453 | 0.002786 | 3639679  |
| CR_08980C_A | 2.965952 | 0.005488 | 3641890  |
| CR_08900C_A | 2.964858 | 0.003875 | 3641908  |
| GUA1        | 2.963212 | 0.000514 | 3634763  |
| SNO1        | 2.956181 | 0.004281 | 3636812  |
| NOP10       | 2.945684 | 0.007427 | 30515434 |
| FGR50       | 2.944875 | 0.017156 | 3644859  |
| RPS6A       | 2.944435 | 5.3E-05  | 3635701  |
| CR_07570W_A | 2.94052  | 0.013758 | 3648004  |
| XOG1        | 2.930666 | 0.001307 | 3636837  |
| ECM15       | 2.930467 | 0.006505 | 30515218 |
| C1_01910W_A | 2.924533 | 0.000639 | 3645425  |
| FAD3        | 2.9222   | 0.002102 | 3636124  |
| C4_01020C_A | 2.914032 | 0.000186 | 3635606  |
| C1_07690C_A | 2.913556 | 0.000306 | 3641767  |
| C5_03400C_A | 2.912537 | 0.03425  | 30515308 |

|             |          |          |         |
|-------------|----------|----------|---------|
| C3_07770C_A | 2.909482 | 0.005326 | 3647457 |
| SWI4        | 2.903166 | 0.002104 | 3645408 |
| C1_11120C_A | 2.901723 | 0.001184 | 3644412 |
| CR_08450C_A | 2.900997 | 0.021335 | 3642133 |
| C1_10110W_A | 2.89215  | 0.022286 | 3634778 |
| MSK1        | 2.889795 | 0.016449 | 3637032 |
| VPS52       | 2.888671 | 0.006335 | 3638996 |
| LTP1        | 2.887916 | 0.006375 | 3640760 |
| CR_07780W_A | 2.885864 | 0.001918 | 3647352 |
| YVC1        | 2.879651 | 0.000504 | 3642303 |
| LCB2        | 2.872639 | 0.000553 | 3636181 |
| MRP2        | 2.870864 | 0.004438 | 3636498 |
| TRP99       | 2.869413 | 0.01015  | 3642494 |
| ROD1        | 2.865357 | 0.000116 | 3635763 |
| LIP5        | 2.862835 | 0.042246 | 3641356 |
| C5_05440C_A | 2.862329 | 0.001278 | 3636431 |
| ALT1        | 2.860443 | 0.000823 | 3638307 |
| OCA1        | 2.855923 | 0.037312 | 3643929 |
| C1_07050C_A | 2.850383 | 0.00309  | 3639532 |
| PGA33       | 2.84716  | 0.014685 | 3637350 |
| RAD6        | 2.840116 | 0.003416 | 3643143 |
| ADE4        | 2.834716 | 0.000236 | 3641769 |
| SPC98       | 2.834469 | 0.017144 | 3640113 |
| RPL16A      | 2.833363 | 7.18E-05 | 3639338 |
| CR_04020C_A | 2.825409 | 0.025621 | 3640969 |
| YCG1        | 2.819095 | 0.013858 | 3636639 |
| LEA1        | 2.818382 | 0.028864 | 3641807 |
| IFR2        | 2.811885 | 0.000302 | 3645100 |
| UBA1        | 2.81018  | 0.000476 | 3642286 |
| C4_05860W_A | 2.806124 | 0.023216 | 3641792 |
| SSO2        | 2.802926 | 0.000612 | 3643809 |
| C1_10090C_A | 2.801757 | 0.000996 | 3634817 |
| RHR2        | 2.794367 | 0.000242 | 3640522 |
| C2_01900C_A | 2.794286 | 0.001793 | 3635789 |
| C1_08110W_A | 2.790388 | 0.000147 | 3640716 |
| TFC4        | 2.787815 | 0.006499 | 3638420 |
| C6_02410W_A | 2.777775 | 0.000745 | 3645884 |
| RHD1        | 2.77686  | 0.005072 | 3647531 |
| C3_03080W_A | 2.77523  | 0.029236 | 3638397 |
| C3_02190C_A | 2.770736 | 0.007063 | 3636642 |
| PGA52       | 2.769881 | 0.000228 | 3647908 |
| CAT2        | 2.769227 | 0.000447 | 3635659 |
| C7_03840W_A | 2.76771  | 0.012631 | 3643146 |
| C2_07100W_A | 2.767164 | 0.002654 | 3643504 |
| C1_12760W_A | 2.764793 | 0.005764 | 3646817 |
| RPL3        | 2.763807 | 0.000147 | 3647719 |
| C2_01170C_A | 2.760919 | 0.001431 | 3638860 |

|             |          |          |          |
|-------------|----------|----------|----------|
| C1_11100W_A | 2.751881 | 0.029872 | 3644414  |
| YPT72       | 2.751879 | 0.017687 | 3643523  |
| CR_05860W_A | 2.751309 | 0.004644 | 3646703  |
| CHT2        | 2.750528 | 0.008302 | 3636523  |
| CNB1        | 2.749629 | 0.017617 | 3636463  |
| ERG4        | 2.745778 | 0.00048  | 3640511  |
| C7_02470C_A | 2.743875 | 0.013961 | 3636945  |
| C1_02240W_A | 2.742696 | 0.000311 | 3644597  |
| C7_00210C_A | 2.741526 | 0.002694 | 3637983  |
| FUM11       | 2.732773 | 0.01768  | 3641016  |
| CR_06620W_A | 2.732739 | 0.006852 | 3646631  |
| ARF2        | 2.732724 | 0.001335 | 3635271  |
| TOS4        | 2.732464 | 0.007509 | 3644548  |
| C7_00140C_A | 2.727499 | 0.006982 | 3637974  |
| C5_02400W_A | 2.725647 | 0.001948 | 3637724  |
| GCV1        | 2.721829 | 0.011369 | 3639172  |
| ARA1        | 2.712856 | 0.006197 | 3642331  |
| C2_10700C_A | 2.710234 | 0.005354 | 3641207  |
| C2_00880W_A | 2.701544 | 0.036035 | 3638897  |
| C2_02170W_A | 2.69515  | 0.00446  | 3635751  |
| C5_01420W_A | 2.694459 | 0.009136 | 3647055  |
| CCT2        | 2.679026 | 0.000372 | 3643815  |
| C3_05550C_A | 2.678097 | 0.018841 | 3643659  |
| C5_01440C_A | 2.677358 | 0.074574 | 3647043  |
| RPN7        | 2.673313 | 0.000313 | 3641909  |
| FLC2        | 2.671508 | 0.000218 | 3647962  |
| C1_02830W_A | 2.664035 | 0.026776 | 3636876  |
| C4_00230W_A | 2.660304 | 0.032086 | 3645034  |
| C1_14090W_A | 2.660163 | 0.005376 | 30515079 |
| UAP1        | 2.659047 | 0.000735 | 3637769  |
| C5_00610C_A | 2.654349 | 0.038926 | 3641585  |
| C4_03730C_A | 2.650619 | 0.027529 | 3645358  |
| C4_00780C_A | 2.646322 | 0.000724 | 3645759  |
| C2_01390W_A | 2.645754 | 0.000522 | 3635726  |
| OBPA        | 2.645577 | 0.00024  | 3643764  |
| TIM44       | 2.644263 | 0.00042  | 3640529  |
| C5_03140C_A | 2.64047  | 0.000266 | 3637798  |
| FUM12       | 2.638742 | 0.000749 | 3638489  |
| CCT5        | 2.637196 | 0.00025  | 3643478  |
| C5_01540W_A | 2.636122 | 0.000529 | 30515301 |
| VPS8        | 2.635617 | 0.02588  | 3640534  |
| C7_01930C_A | 2.635527 | 0.026396 | 3637027  |
| RPL15A      | 2.630417 | 0.00025  | 3641025  |
| BUL1        | 2.626518 | 0.021657 | 3640734  |
| TIM8        | 2.626236 | 0.039939 | 3647469  |
| C1_14050C_A | 2.625731 | 0.004098 | 3643343  |
| GCF1        | 2.619019 | 0.001282 | 3646498  |

|             |          |          |          |
|-------------|----------|----------|----------|
| RPS21       | 2.613645 | 0.000366 | 3640242  |
| C1_06670W_A | 2.613452 | 0.004391 | 3639541  |
| C1_06890C_A | 2.610809 | 0.000385 | 30515014 |
| PTC7        | 2.608861 | 0.001049 | 3645000  |
| C2_08650W_A | 2.608056 | 0.008269 | 3643908  |
| CR_10020C_A | 2.60732  | 0.029973 | 3639032  |
| RPS18       | 2.606218 | 0.000908 | 3637953  |
| C2_05590C_A | 2.605053 | 0.015229 | 3645564  |
| ZCF32       | 2.603666 | 0.043544 | 3635213  |
| ADE12       | 2.601634 | 0.000292 | 3634869  |
| C4_00410W_A | 2.600207 | 0.031554 | 3645019  |
| C1_00320W_A | 2.592532 | 0.029481 | 3639297  |
| CR_04330W_A | 2.591602 | 0.029425 | 3640997  |
| C7_01350C_A | 2.59116  | 0.028647 | 3645899  |
| SRV2        | 2.581991 | 0.000217 | 3640938  |
| C4_04720W_A | 2.580818 | 0.004417 | 3641137  |
| C1_05390C_A | 2.579229 | 0.006953 | 3642479  |
| C2_02870W_A | 2.576386 | 0.028711 | 3642972  |
| SCL1        | 2.57528  | 0.000863 | 3640510  |
| PTC6        | 2.568067 | 0.032297 | 3647351  |
| C4_07240W_A | 2.56766  | 0.018463 | 3642945  |
| C1_11250W_A | 2.564545 | 0.012921 | 3644556  |
| CCC1        | 2.564029 | 0.041174 | 3645645  |
| C6_02370C_A | 2.561854 | 0.001456 | 3645882  |
| C2_09600C_A | 2.559431 | 0.023571 | 3643799  |
| RAV2        | 2.555637 | 0.04696  | 3639252  |
| POB3        | 2.553709 | 0.000677 | 3635827  |
| YKT6        | 2.551705 | 0.003424 | 3636863  |
| SUC1        | 2.549436 | 0.02722  | 3641916  |
| C6_00190W_A | 2.548246 | 0.01307  | 3646080  |
| C1_10460W_A | 2.544491 | 0.008158 | 3647183  |
| PPH21       | 2.543331 | 0.001733 | 3636665  |
| C6_03310W_A | 2.541668 | 0.018789 | 3639197  |
| LHP1        | 2.541122 | 0.003245 | 3646665  |
| CR_01820W_A | 2.541014 | 0.001526 | 3640164  |
| RPL14       | 2.540898 | 0.001299 | 30515072 |
| VAN1        | 2.53966  | 0.000855 | 3638527  |
| GUS1        | 2.536409 | 0.001325 | 3638029  |
| NTH1        | 2.533743 | 0.001622 | 3639665  |
| COX4        | 2.533335 | 0.000194 | 3635737  |
| CR_01380W_A | 2.532678 | 0.008337 | 3640131  |
| PKH3        | 2.524895 | 0.001637 | 3646075  |
| C2_08270C_A | 2.524422 | 0.009374 | 3642347  |
| C2_07610C_A | 2.521122 | 0.001171 | 3645195  |
| C7_01600W_A | 2.5145   | 0.001225 | 3637036  |
| CR_01050C_A | 2.512217 | 0.004959 | 3640384  |
| SES1        | 2.510261 | 0.001967 | 3638415  |

|             |          |          |          |
|-------------|----------|----------|----------|
| ALG2        | 2.510198 | 0.010958 | 3647832  |
| C5_00050W_A | 2.502538 | 0.024699 | 3647875  |
| RPD31       | 2.498386 | 0.00171  | 3638520  |
| C2_01690W_A | 2.495924 | 0.002746 | 3635728  |
| C2_07440C_A | 2.49306  | 0.026509 | 3645200  |
| AHA1        | 2.485344 | 0.006575 | 3638933  |
| VMA4        | 2.485243 | 0.001174 | 3640111  |
| CMD1        | 2.483353 | 0.002551 | 3646520  |
| TFS1        | 2.482973 | 0.005606 | 3642655  |
| RPS21B      | 2.482159 | 0.001142 | 30514961 |
| CR_09640C_A | 2.481152 | 0.018374 | 30515456 |
| HEM2        | 2.476078 | 0.005086 | 3637428  |
| C3_00050C_A | 2.475748 | 0.023432 | 3640570  |
| C6_00200C_A | 2.474936 | 0.011036 | 3646082  |
| DBF4        | 2.47255  | 0.014588 | 3641388  |
| CHC1        | 2.469867 | 0.001166 | 3647552  |
| RPL23A      | 2.469348 | 0.004156 | 3647558  |
| C1_06190C_A | 2.466594 | 0.001915 | 3648391  |
| C6_01420C_A | 2.466169 | 0.011151 | 3641602  |
| TPO3        | 2.456545 | 0.013236 | 3634790  |
| C1_02270C_A | 2.454121 | 0.021181 | 3644566  |
| C7_03830C_A | 2.452941 | 0.138018 | 3643147  |
| C3_00830C_A | 2.451268 | 0.007387 | 3647757  |
| ARO7        | 2.450556 | 0.04051  | 3645337  |
| C7_04280C_A | 2.449145 | 0.012615 | 3643173  |
| C3_06860C_A | 2.446729 | 0.018356 | 3638541  |
| TAF14       | 2.443815 | 0.00175  | 3637357  |
| C5_01890W_A | 2.443393 | 0.009792 | 3643750  |
| C2_04490W_A | 2.438664 | 0.004531 | 3645463  |
| C6_03820C_A | 2.431458 | 0.013715 | 3640288  |
| C4_01780C_A | 2.42938  | 0.024024 | 3635582  |
| SEC3        | 2.427876 | 0.006339 | 3642806  |
| RPL27A      | 2.42591  | 0.003279 | 30515062 |
| DBP5        | 2.425747 | 0.000557 | 3636564  |
| CR_07370W_A | 2.425181 | 0.044665 | 3646053  |
| RPL4B       | 2.422534 | 0.000834 | 3643347  |
| CR_08350W_A | 2.419772 | 0.001494 | 3642082  |
| SDH2        | 2.417778 | 0.004901 | 3646397  |
| C1_01900C_A | 2.417169 | 0.015114 | 3645426  |
| CR_04230W_A | 2.415086 | 0.009773 | 3640944  |
| C3_06800C_A | 2.412463 | 0.017071 | 3638497  |
| SMC4        | 2.408426 | 0.008949 | 3641578  |
| BEM2        | 2.40799  | 0.000647 | 3637044  |
| HAT2        | 2.4068   | 0.005846 | 3645973  |
| TIF         | 2.406503 | 0.000532 | 3640190  |
| HPC2        | 2.402855 | 0.009509 | 3636188  |
| C2_07810W_A | 2.402258 | 0.009548 | 3642324  |

|             |          |          |         |
|-------------|----------|----------|---------|
| C1_04980C_A | 2.400842 | 0.01056  | 3647529 |
| RPS20       | 2.398222 | 0.005194 | 3642071 |
| CR_00490W_A | 2.397523 | 0.002322 | 3639723 |
| C3_01280W_A | 2.396025 | 0.023296 | 3636623 |
| C6_02940C_A | 2.395941 | 0.005395 | 3639187 |
| C7_00410C_A | 2.392904 | 0.040946 | 3638033 |
| SPO75       | 2.392502 | 0.011521 | 3645364 |
| SEC10       | 2.388256 | 0.002632 | 3642961 |
| C4_06020C_A | 2.388194 | 0.006648 | 3646519 |
| C2_05580W_A | 2.386829 | 0.00179  | 3645563 |
| C6_01950C_A | 2.385505 | 0.006053 | 3644558 |
| PKH2        | 2.38509  | 0.000585 | 3642058 |
| HGT7        | 2.384254 | 0.00168  | 3638876 |
| URA3        | 2.381224 | 0.013438 | 3636649 |
| CYP5        | 2.374752 | 0.000375 | 3642257 |
| C3_01210C_A | 2.373884 | 0.007227 | 3636612 |
| ERG20       | 2.372683 | 0.003382 | 3645440 |
| ALG9        | 2.372306 | 0.017539 | 3644457 |
| C1_12660W_A | 2.370789 | 0.041652 | 3646835 |
| AHP1        | 2.366512 | 0.032549 | 3637850 |
| PHB2        | 2.366418 | 0.005945 | 3635238 |
| C6_02680W_A | 2.365336 | 0.022022 | 3639226 |
| ERF1        | 2.363412 | 0.002871 | 3643455 |
| C2_00830C_A | 2.360968 | 0.005531 | 3638808 |
| C4_02780W_A | 2.360934 | 0.001235 | 3637902 |
| C5_03980W_A | 2.356079 | 0.00176  | 3647442 |
| C3_03760W_A | 2.351623 | 0.010457 | 3645638 |
| C5_01350W_A | 2.350552 | 0.010314 | 3642640 |
| CR_10290C_A | 2.347154 | 0.002646 | 3638935 |
| AKR1        | 2.34715  | 0.005068 | 3636166 |
| TIM21       | 2.347073 | 0.014822 | 3644573 |
| C3_07740W_A | 2.345201 | 0.002226 | 3638453 |
| IDP2        | 2.340606 | 0.013762 | 3644934 |
| COQ6        | 2.340424 | 0.003474 | 3636878 |
| C2_02840C_A | 2.334785 | 0.023516 | 3642976 |
| C1_02490C_A | 2.330318 | 0.042423 | 3636853 |
| YCS4        | 2.329959 | 0.004021 | 3645196 |
| CBP1        | 2.316461 | 0.019153 | 3641920 |
| C1_11920W_A | 2.312392 | 0.031676 | 3642003 |
| VPS33       | 2.308513 | 0.012914 | 3647477 |
| DUR1,2      | 2.306728 | 0.022933 | 3644771 |
| TCP1        | 2.305661 | 0.000655 | 3646499 |
| TYS1        | 2.303628 | 0.00222  | 3637870 |
| C3_00170C_A | 2.303587 | 0.040103 | 3640589 |
| ENT3        | 2.300973 | 0.005094 | 3635813 |
| UBC15       | 2.300738 | 0.047456 | 3641260 |
| HAC1        | 2.297698 | 0.00149  | 3639849 |

|             |          |          |          |
|-------------|----------|----------|----------|
| IPL1        | 2.296144 | 0.110178 | 3645876  |
| CR_03400W_A | 2.293458 | 0.006844 | 3645137  |
| VAM3        | 2.289479 | 0.205181 | 3635146  |
| CHS5        | 2.288634 | 0.001886 | 3637333  |
| SYS3        | 2.287636 | 0.003454 | 3645119  |
| PEX7        | 2.28584  | 0.011722 | 3644027  |
| DAO2        | 2.285758 | 0.003681 | 3646797  |
| NHX1        | 2.284051 | 0.00322  | 3647141  |
| C1_05900W_A | 2.275843 | 0.016828 | 3639866  |
| CSP37       | 2.275821 | 0.007898 | 3640098  |
| C1_13260W_A | 2.273766 | 0.030325 | 30515074 |
| CR_10170C_A | 2.273543 | 0.004839 | 3638916  |
| C1_07840W_A | 2.272855 | 0.012887 | 3640737  |
| C7_01270C_A | 2.269382 | 0.045222 | 3645908  |
| C2_09650W_A | 2.263158 | 0.003133 | 3643794  |
| CR_08640C_A | 2.261688 | 0.003828 | 3642112  |
| RPS23A      | 2.243322 | 0.001523 | 3639515  |
| SFL2        | 2.241545 | 0.035778 | 3636434  |
| YRB1        | 2.238032 | 0.002611 | 3639663  |
| C2_08380C_A | 2.237885 | 0.11074  | 3648253  |
| C6_02490C_A | 2.235229 | 0.04512  | 3639171  |
| MKK2        | 2.234546 | 0.00345  | 3645580  |
| RPN2        | 2.234425 | 0.005785 | 3642027  |
| SAL6        | 2.233342 | 0.000869 | 3640289  |
| RPG1A       | 2.232721 | 0.002734 | 3646816  |
| SSC1        | 2.231566 | 0.00164  | 3645232  |
| ATP16       | 2.230311 | 0.001689 | 3638963  |
| UBC4        | 2.225201 | 0.0093   | 3638927  |
| FBA1        | 2.223999 | 0.004619 | 3635585  |
| RPN1        | 2.222136 | 0.005525 | 3636147  |
| C2_00350W_A | 2.220847 | 0.025373 | 3638827  |
| MIR1        | 2.219877 | 0.002267 | 3634782  |
| UBP13       | 2.21739  | 0.003592 | 3638879  |
| PEP3        | 2.216753 | 0.049622 | 3639267  |
| C4_03320W_A | 2.215545 | 0.027965 | 3648092  |
| C1_08050W_A | 2.204281 | 0.011911 | 3640709  |
| ADE2        | 2.203822 | 0.001658 | 3635259  |
| C2_03900C_A | 2.200039 | 0.009304 | 3637395  |
| C2_03360W_A | 2.198276 | 0.002575 | 3637389  |
| C7_02560W_A | 2.197843 | 0.016571 | 3637016  |
| C3_03410C_A | 2.196789 | 0.011949 | 3638353  |
| C1_09810W_A | 2.193573 | 0.018562 | 3634845  |
| C5_01980C_A | 2.191506 | 0.049925 | 3643775  |
| KEL1        | 2.1879   | 0.002409 | 3639318  |
| NUP159      | 2.178103 | 0.005022 | 3647458  |
| UGP1        | 2.177318 | 0.007928 | 3648144  |
| C4_00700C_A | 2.175461 | 0.019824 | 3645751  |

|             |          |          |          |
|-------------|----------|----------|----------|
| PRE2        | 2.175137 | 0.005044 | 3643490  |
| MUQ1        | 2.17408  | 0.020719 | 3638898  |
| CYC1        | 2.170444 | 0.006109 | 3643937  |
| MCA1        | 2.170268 | 0.001499 | 3635233  |
| GYP2        | 2.166272 | 0.00723  | 3641780  |
| C1_09570W_A | 2.164179 | 0.020453 | 3634887  |
| C6_02810C_A | 2.163822 | 0.011629 | 3639248  |
| C1_09360C_A | 2.163056 | 0.003513 | 3634807  |
| C2_06110W_A | 2.162847 | 0.025145 | 3644094  |
| LRG1        | 2.160149 | 0.003254 | 3639727  |
| SGT1        | 2.160056 | 0.001168 | 3644068  |
| ADE13       | 2.156927 | 0.002715 | 3644863  |
| ULP1        | 2.155375 | 0.033899 | 3638314  |
| MNT2        | 2.155245 | 0.015543 | 3636583  |
| ERG251      | 2.154595 | 0.002513 | 3635716  |
| ATM1        | 2.149868 | 0.01438  | 3646284  |
| NIP1        | 2.147592 | 0.003482 | 3635618  |
| RPN6        | 2.144733 | 0.02105  | 3645352  |
| CR_10590W_A | 2.141792 | 0.027775 | 3639003  |
| VPS35       | 2.136072 | 0.014042 | 3645567  |
| PPZ1        | 2.132447 | 0.030524 | 3645265  |
| MRE11       | 2.129371 | 0.032766 | 3645898  |
| C7_00490C_A | 2.129084 | 0.020392 | 3637986  |
| ACS1        | 2.128117 | 0.027103 | 3643941  |
| CR_05970C_A | 2.127733 | 0.014806 | 3642502  |
| RTF1        | 2.118689 | 0.004732 | 3637964  |
| C1_13720W_A | 2.116922 | 0.014356 | 3636134  |
| URA6        | 2.114616 | 0.007118 | 3647988  |
| MED16       | 2.114154 | 0.026052 | 3646725  |
| RPL12       | 2.113038 | 0.007765 | 3636659  |
| CR_08050C_A | 2.11169  | 0.01691  | 3644133  |
| LPD1        | 2.10678  | 0.007038 | 3646037  |
| C6_04250W_A | 2.102672 | 0.005866 | 30515345 |
| HDA1        | 2.102151 | 0.016209 | 3640154  |
| GDB1        | 2.101875 | 0.026444 | 3647409  |
| C1_12430W_A | 2.099808 | 0.024383 | 3642013  |
| C4_03110W_A | 2.098832 | 0.004465 | 3637924  |
| C4_05810W_A | 2.097446 | 0.008833 | 3641786  |
| MNT3        | 2.08965  | 0.0399   | 3648123  |
| C2_02930C_A | 2.088426 | 0.013675 | 3643015  |
| MSH3        | 2.085688 | 0.043609 | 3643889  |
| RIM20       | 2.08492  | 0.008956 | 3634809  |
| GUT2        | 2.081602 | 0.005759 | 3642921  |
| C1_05780W_A | 2.080705 | 0.008786 | 3639888  |
| UBP1        | 2.079237 | 0.00972  | 3641760  |
| ADP1        | 2.077037 | 0.021088 | 3642458  |
| NPL3        | 2.073631 | 0.013168 | 3643310  |



|             |          |          |          |
|-------------|----------|----------|----------|
| C1_02320C_A | 2.069717 | 0.009633 | 3644572  |
| FCY23       | 2.067808 | 0.010073 | 3647681  |
| CR_09110C_A | 2.067208 | 0.046555 | 3641929  |
| C1_03790C_A | 2.066293 | 0.011503 | 3644682  |
| MID1        | 2.063795 | 0.040614 | 3647441  |
| PHO85       | 2.062581 | 0.009392 | 3646148  |
| C2_10460C_A | 2.061333 | 0.009214 | 3641195  |
| C2_04400W_A | 2.059212 | 0.00505  | 3645457  |
| C6_02450W_A | 2.055757 | 0.008441 | 3639167  |
| CR_10600C_A | 2.055218 | 0.008644 | 3639004  |
| APA2        | 2.050799 | 0.02727  | 3639234  |
| C1_08690W_A | 2.050052 | 0.041311 | 3634934  |
| C2_06850W_A | 2.0475   | 0.115864 | 30515142 |
| RPS22A      | 2.044089 | 0.010647 | 3639551  |
| CR_05890C_A | 2.042655 | 0.036471 | 3646682  |
| C3_00660W_A | 2.042003 | 0.031517 | 3640538  |
| FAD2        | 2.039131 | 0.005348 | 3644053  |
| CIT1        | 2.038346 | 0.017516 | 3643201  |
| MRS7        | 2.037987 | 0.007178 | 3640187  |
| SRP101      | 2.037431 | 0.010448 | 3636513  |
| C4_03130W_A | 2.03585  | 0.013405 | 3637921  |
| BIG1        | 2.035643 | 0.043422 | 3644434  |
| IST2        | 2.034608 | 0.043932 | 3646662  |
| C1_12830C_A | 2.028566 | 0.01781  | 3636176  |
| C1_10620W_A | 2.023659 | 0.019587 | 3647682  |
| PGA14       | 2.023413 | 0.005138 | 3641560  |
| RPC53       | 2.018355 | 0.035244 | 3637898  |
| RPB8        | 2.016928 | 0.044401 | 3647301  |
| TPI1        | 2.013905 | 0.028277 | 3638482  |
| EXO84       | 2.008765 | 0.011763 | 3644022  |
| PHM5        | 2.005692 | 0.011702 | 3637951  |
| DCK1        | 2.003436 | 0.027908 | 3637383  |
| C7_00250C_A | 2.002314 | 0.043597 | 3637979  |
| CR_08560C_A | 2.00122  | 0.021759 | 3642142  |
| CSA1        | 1.997034 | 0.039592 | 3638009  |
| SAS3        | 1.997032 | 0.051277 | 3640073  |
| C1_12170C_A | 1.993797 | 0.078453 | 3642039  |
| C1_06120C_A | 1.991532 | 0.467272 | 3639850  |
| GBP2        | 1.990402 | 0.005974 | 3637992  |
| SPP1        | 1.983878 | 0.053535 | 3636897  |
| C1_12920C_A | 1.983175 | 0.085016 | 3636155  |
| MNN12       | 1.980729 | 0.043113 | 3634904  |
| VTC3        | 1.979989 | 0.014407 | 3643206  |
| C4_03810W_A | 1.97923  | 0.13707  | 3645350  |
| C5_02900W_A | 1.977067 | 0.065725 | 3637747  |
| C5_02500C_A | 1.976371 | 0.024326 | 3637766  |
| C3_01970C_A | 1.973617 | 0.712293 | 3636597  |

|             |          |          |          |
|-------------|----------|----------|----------|
| C6_02580W_A | 1.972947 | 0.05094  | 3639207  |
| GLT1        | 1.972256 | 0.017634 | 3639519  |
| C5_01940W_A | 1.970793 | 0.02661  | 3643740  |
| PEX17       | 1.970265 | 0.092125 | 3643886  |
| CR_08170C_A | 1.970112 | 0.088879 | 3642073  |
| TFA1        | 1.966222 | 0.016938 | 3634850  |
| ADE17       | 1.966116 | 0.014176 | 3641024  |
| ERG7        | 1.960198 | 0.018956 | 3635761  |
| C3_02290W_A | 1.959688 | 0.096495 | 3636556  |
| C7_02480W_A | 1.953599 | 0.098211 | 3636944  |
| TRM1        | 1.950441 | 0.049212 | 3640396  |
| C1_11430W_A | 1.950424 | 0.142621 | 3644541  |
| C3_00640W_A | 1.949263 | 0.019593 | 3640574  |
| CZF1        | 1.949246 | 0.032025 | 3642915  |
| CR_00890C_A | 1.948105 | 0.37242  | 30515370 |
| C1_12640W_A | 1.94783  | 0.371519 | 3646837  |
| C4_06290W_A | 1.94743  | 0.374417 | 30515283 |
| CR_03860C_A | 1.946192 | 0.049477 | 3643186  |
| CDC27       | 1.944563 | 0.10272  | 3640405  |
| C3_07480W_A | 1.943962 | 0.060237 | 3638529  |
| SRD1        | 1.940965 | 0.155479 | 3635764  |
| YCP4        | 1.934904 | 0.04452  | 3648032  |
| MLT1        | 1.93207  | 0.010799 | 3640748  |
| CAT1        | 1.931898 | 0.079773 | 3639495  |
| C3_01570W_A | 1.929465 | 0.139944 | 3636668  |
| C3_00610W_A | 1.927259 | 0.161752 | 3640578  |
| C6_00760W_A | 1.92717  | 0.046469 | 3647080  |
| RPL10       | 1.92692  | 0.018463 | 3636850  |
| C5_00140C_A | 1.92479  | 0.045261 | 3647873  |
| RAP1        | 1.924277 | 0.171362 | 3643945  |
| RPN8        | 1.922049 | 0.016815 | 3643770  |
| ZUO1        | 1.921622 | 0.017257 | 3637908  |
| MRPL19      | 1.920251 | 0.108617 | 3639497  |
| C4_01120C_A | 1.919239 | 0.111823 | 3635683  |
| TIM10       | 1.917329 | 0.067589 | 30515247 |
| SEC14       | 1.917144 | 0.012225 | 3641542  |
| C1_09070W_A | 1.916203 | 0.050497 | 3634773  |
| C5_01140C_A | 1.915736 | 0.026776 | 3642663  |
| C1_03370W_A | 1.914099 | 0.020721 | 3636891  |
| CR_01560W_A | 1.913774 | 0.219849 | 3640075  |
| RPL30       | 1.913773 | 0.016813 | 30515273 |
| RPS24       | 1.913732 | 0.028231 | 3640568  |
| C4_06470W_A | 1.913279 | 0.052683 | 3642790  |
| SNG3        | 1.913035 | 0.14672  | 3646715  |
| RPC31       | 1.911653 | 0.083598 | 3642577  |
| C6_00560W_A | 1.911403 | 0.028655 | 3647143  |
| OXR1        | 1.908248 | 0.061709 | 3638372  |

|             |          |          |          |
|-------------|----------|----------|----------|
| SLP2        | 1.906551 | 0.058381 | 3644091  |
| C1_07090C_A | 1.906275 | 0.012821 | 3639488  |
| AGC1        | 1.906062 | 0.017688 | 3636219  |
| C6_03040C_A | 1.904627 | 0.131888 | 3639269  |
| C1_04620W_A | 1.90418  | 0.056026 | 3646135  |
| C1_12740W_A | 1.899701 | 0.060418 | 3646819  |
| C2_05020W_A | 1.899465 | 0.234951 | 3643447  |
| C1_09610W_A | 1.898384 | 0.05567  | 3634891  |
| MGM101      | 1.898008 | 0.09247  | 3636820  |
| TOA2        | 1.893366 | 0.110882 | 3635710  |
| PEP1        | 1.88931  | 0.022366 | 3647612  |
| BMT3        | 1.885721 | 0.119016 | 3640439  |
| CR_09050C_A | 1.883753 | 0.324436 | 3648197  |
| C7_04210C_A | 1.883652 | 0.017602 | 3643121  |
| CR_09570W_A | 1.883105 | 0.324295 | 3647098  |
| CR_05960W_A | 1.880506 | 0.403074 | 30515417 |
| SPC19       | 1.880192 | 0.401359 | 3646423  |
| ZCF22       | 1.879999 | 0.406669 | 3637727  |
| C3_02120W_A | 1.879198 | 0.04577  | 3636658  |
| RPS28B      | 1.87898  | 0.018628 | 30515349 |
| CR_10510W_A | 1.878155 | 0.0759   | 3639039  |
| DCR1        | 1.877216 | 0.025497 | 3641164  |
| IML2        | 1.877211 | 0.013595 | 3643302  |
| UME7        | 1.875075 | 0.5037   | 3637918  |
| C3_04100W_A | 1.875002 | 0.505681 | 30515201 |
| ALS2        | 1.872231 | 0.03367  | 3645724  |
| C1_10820C_A | 1.870931 | 0.028841 | 3644435  |
| C1_07060C_A | 1.869691 | 0.231593 | 30515018 |
| C3_07460W_A | 1.869036 | 0.089847 | 3638480  |
| KGD1        | 1.867657 | 0.036575 | 3647752  |
| MED17       | 1.867037 | 0.043041 | 3636918  |
| HSP60       | 1.860731 | 0.023722 | 3645275  |
| SSN8        | 1.860307 | 0.107508 | 3641718  |
| C4_02160C_A | 1.859771 | 0.048058 | 3635668  |
| CR_09660W_A | 1.856458 | 0.113292 | 3647092  |
| AVT4        | 1.856021 | 0.0431   | 3645316  |
| RPL21A      | 1.856004 | 0.041883 | 3637400  |
| C3_04360W_A | 1.854117 | 0.072491 | 3635276  |
| BCY1        | 1.853754 | 0.014608 | 3638832  |
| C4_01760W_A | 1.852585 | 0.106943 | 3635584  |
| C7_03010W_A | 1.850143 | 0.010903 | 3641382  |
| C1_10500W_A | 1.848545 | 0.261861 | 3647188  |
| LTE1        | 1.846909 | 0.068057 | 3643495  |
| C2_00390C_A | 1.845189 | 0.021437 | 3638822  |
| C3_00890C_A | 1.844239 | 0.116339 | 3647753  |
| CMK1        | 1.843771 | 0.01654  | 3635263  |
| C6_04340W_A | 1.843372 | 0.12354  | 3646291  |

|             |          |          |          |
|-------------|----------|----------|----------|
| PRT1        | 1.842799 | 0.022874 | 3636959  |
| ZCF10       | 1.840599 | 0.086406 | 3643485  |
| C6_03600C_A | 1.83877  | 0.733327 | 3640295  |
| C6_02550W_A | 1.83877  | 0.733378 | 3639204  |
| MRV8        | 1.83877  | 0.733401 | 3636450  |
| C3_01440C_A | 1.83877  | 0.733491 | 3636632  |
| C3_04310C_A | 1.838579 | 0.730018 | 3635145  |
| FIG1        | 1.838579 | 0.730225 | 3644025  |
| C7_02140W_A | 1.838579 | 0.730433 | 3636996  |
| NUP         | 1.838579 | 0.730438 | 3637041  |
| CR_00350W_A | 1.838498 | 0.047282 | 3639686  |
| C3_03020W_A | 1.838388 | 0.731568 | 3638391  |
| CR_01910C_A | 1.838388 | 0.731579 | 3640095  |
| PGA31       | 1.838388 | 0.731634 | 3641226  |
| C1_11260C_A | 1.838388 | 0.731724 | 30515051 |
| RBF1        | 1.838215 | 0.191089 | 3639251  |
| C1_04860W_A | 1.836662 | 0.026828 | 3644784  |
| C2_07790C_A | 1.836164 | 0.344479 | 3642326  |
| C1_03260W_A | 1.836046 | 0.080153 | 3636898  |
| RPS25B      | 1.83553  | 0.04174  | 3646972  |
| CR_08520C_A | 1.835414 | 0.349558 | 30515443 |
| C5_05150C_A | 1.835029 | 0.143467 | 3636461  |
| C6_02430W_A | 1.833034 | 0.024817 | 3639163  |
| C2_10720C_A | 1.831575 | 0.051071 | 3641209  |
| C2_02000W_A | 1.829734 | 0.035942 | 3635767  |
| PEX1        | 1.828692 | 0.083073 | 3636943  |
| AGE2        | 1.825543 | 0.048703 | 3643810  |
| C1_04560W_A | 1.821438 | 0.192186 | 3646130  |
| C1_01530C_A | 1.820125 | 0.034898 | 3640232  |
| SOD2        | 1.819196 | 0.219943 | 3640231  |
| C7_00790W_A | 1.818456 | 0.058842 | 3637943  |
| C5_02330W_A | 1.818    | 0.147589 | 3637789  |
| NCP1        | 1.814661 | 0.025742 | 3637839  |
| C2_07910C_A | 1.81452  | 0.437481 | 30515146 |
| BEM3        | 1.814197 | 0.03894  | 3637885  |
| MTO1        | 1.813349 | 0.203302 | 3640707  |
| C1_08930C_A | 1.811888 | 0.30739  | 30515031 |
| C3_02850C_A | 1.810056 | 0.222118 | 3638332  |
| WRS1        | 1.808958 | 0.050567 | 3642060  |
| KEM1        | 1.808921 | 0.043263 | 3636222  |
| ACP1        | 1.808837 | 0.068324 | 3639825  |
| C4_02720C_A | 1.808724 | 0.10278  | 3637857  |
| C1_02770W_A | 1.80834  | 0.265086 | 30514973 |
| C2_04170C_A | 1.807317 | 0.033827 | 30515111 |
| MRS4        | 1.805861 | 0.056994 | 3642306  |
| SAC6        | 1.804432 | 0.056845 | 3639213  |
| NAT2        | 1.802322 | 0.044943 | 3638837  |

|             |          |          |          |
|-------------|----------|----------|----------|
| CEF3        | 1.800732 | 0.036291 | 3647040  |
| CR_04460C_A | 1.800477 | 0.216958 | 3640988  |
| C2_08990C_A | 1.800306 | 0.062362 | 3645783  |
| HGT5        | 1.799748 | 0.086654 | 3635201  |
| C1_08680C_A | 1.79764  | 0.134854 | 3634933  |
| C3_04650W_A | 1.797614 | 0.277605 | 3635192  |
| C6_00260W_A | 1.797612 | 0.028668 | 3646065  |
| ERB1        | 1.795799 | 0.027295 | 3644702  |
| C3_03820C_A | 1.794958 | 0.078789 | 3645631  |
| NUO2        | 1.793752 | 0.0362   | 3638381  |
| NMT1        | 1.792761 | 0.052712 | 3635624  |
| C3_01790C_A | 1.792022 | 0.08554  | 3636587  |
| C1_12810W_A | 1.790188 | 0.151859 | 3646827  |
| C1_11970C_A | 1.79002  | 0.143457 | 3642044  |
| ULP3        | 1.789595 | 0.081596 | 3640526  |
| OCA6        | 1.789522 | 0.367768 | 3643336  |
| C4_01830C_A | 1.789069 | 0.205525 | 3635593  |
| C2_04320W_A | 1.78903  | 0.142853 | 3648274  |
| COI1        | 1.788575 | 0.075372 | 3640721  |
| C6_01330C_A | 1.788493 | 0.365246 | 3641643  |
| EMP46       | 1.786999 | 0.043101 | 3645270  |
| SWD3        | 1.785879 | 0.228244 | 3645890  |
| C5_02310C_A | 1.784601 | 0.155208 | 3637787  |
| CRK1        | 1.784306 | 0.071071 | 3643414  |
| CR_06270W_A | 1.782071 | 0.459977 | 3644854  |
| CST20       | 1.78133  | 0.049781 | 3637790  |
| C5_01110W_A | 1.780815 | 0.044909 | 3642623  |
| GTR1        | 1.77785  | 0.237654 | 3643914  |
| HTB1        | 1.776655 | 0.104908 | 3645659  |
| C2_00570W_A | 1.775081 | 0.085278 | 3638853  |
| PGA49       | 1.774362 | 0.189367 | 3646525  |
| GPX2        | 1.771391 | 0.162531 | 3644009  |
| TLO34       | 1.770992 | 0.153988 | 3648392  |
| CDC53       | 1.769572 | 0.047846 | 3636603  |
| C5_04620C_A | 1.769501 | 0.168297 | 3636394  |
| C1_06390W_A | 1.76941  | 0.151619 | 3639558  |
| RIB5        | 1.768095 | 0.090353 | 3636499  |
| C1_06500W_A | 1.767872 | 0.298315 | 3639550  |
| C1_09940W_A | 1.766687 | 0.298365 | 30515037 |
| CHS8        | 1.765573 | 0.046764 | 3640532  |
| C1_03430W_A | 1.765364 | 0.168093 | 3636906  |
| MCU1        | 1.765333 | 0.143884 | 3636169  |
| CR_09620C_A | 1.763849 | 0.105001 | 6335435  |
| C1_09110W_A | 1.762606 | 0.24283  | 3634940  |
| C1_05830W_A | 1.761823 | 0.756357 | 3639883  |
| LDG3        | 1.761823 | 0.756384 | 3637001  |
| C1_05450W_A | 1.761823 | 0.756391 | 3642490  |

|             |          |          |          |
|-------------|----------|----------|----------|
| CR_01350C_A | 1.759593 | 0.039762 | 3640166  |
| SIT4        | 1.759538 | 0.087737 | 3647993  |
| C1_12480W_A | 1.759313 | 0.549084 | 30515063 |
| C1_14500C_A | 1.759149 | 0.054713 | 3643331  |
| POL32       | 1.756928 | 0.0883   | 3639881  |
| NRP1        | 1.756498 | 0.176254 | 3640698  |
| C1_01300W_A | 1.756182 | 0.079789 | 3640185  |
| PRC3        | 1.755686 | 0.084922 | 3639889  |
| C4_01910W_A | 1.75425  | 0.269731 | 3635635  |
| PRP3        | 1.752248 | 0.100714 | 3637406  |
| C6_03730C_A | 1.752229 | 0.087542 | 3640303  |
| PSD2        | 1.751828 | 0.048669 | 3636515  |
| C1_10350C_A | 1.751659 | 0.037335 | 3634835  |
| RPL82       | 1.751635 | 0.043648 | 3644419  |
| C4_03920W_A | 1.748617 | 0.156053 | 3648314  |
| C4_01310W_A | 1.747217 | 0.460641 | 3635604  |
| CR_01550C_A | 1.747135 | 0.153924 | 3640074  |
| GCR3        | 1.746674 | 0.027058 | 3646485  |
| RIM13       | 1.746435 | 0.090795 | 3636487  |
| URA2        | 1.743903 | 0.052539 | 3645728  |
| CR_06560C_A | 1.743797 | 0.10461  | 3648367  |
| C5_01090C_A | 1.742308 | 0.089938 | 3642625  |
| MAD2        | 1.742088 | 0.392235 | 3644696  |
| CIS2        | 1.741551 | 0.072571 | 3639366  |
| ARP4        | 1.741086 | 0.092905 | 3639201  |
| RUB1        | 1.741005 | 0.256454 | 30515194 |
| C1_07010W_A | 1.740489 | 0.338787 | 3639537  |
| C2_04410W_A | 1.739854 | 0.269673 | 3645455  |
| CDC5        | 1.738939 | 0.179923 | 3639281  |
| C3_02690C_A | 1.738873 | 0.076704 | 3638407  |
| TIF11       | 1.737844 | 0.052333 | 3641208  |
| CCT3        | 1.73554  | 0.029367 | 3636458  |
| SWD2        | 1.734755 | 0.164777 | 3646677  |
| C2_08420W_A | 1.734293 | 0.207962 | 3643897  |
| C4_02430W_A | 1.734244 | 0.105264 | 3637848  |
| C6_01490C_A | 1.733925 | 0.342727 | 3641620  |
| RPL42       | 1.733511 | 0.07215  | 30515041 |
| C1_05010C_A | 1.733175 | 0.081471 | 3647532  |
| TIM54       | 1.732936 | 0.049033 | 3641349  |
| MEC1        | 1.731212 | 0.121974 | 3647733  |
| RSR1        | 1.730618 | 0.073521 | 3640145  |
| C3_06350W_A | 1.730153 | 0.194751 | 30515215 |
| CR_04120C_A | 1.730132 | 0.174455 | 3640972  |
| RAD50       | 1.729574 | 0.092649 | 3636594  |
| STN1        | 1.723093 | 0.578867 | 3643901  |
| C2_10630W_A | 1.721586 | 0.148055 | 3641248  |
| RPL29       | 1.721191 | 0.059795 | 30515048 |

|             |          |          |          |
|-------------|----------|----------|----------|
| REX2        | 1.719131 | 0.168413 | 3635783  |
| CDC20       | 1.7172   | 0.195326 | 3644057  |
| SYN8        | 1.717148 | 0.215577 | 3645120  |
| FLO9        | 1.71697  | 0.110606 | 3640581  |
| CR_03690W_A | 1.716603 | 0.070038 | 3643222  |
| PEX22       | 1.716301 | 0.208652 | 3648103  |
| C3_03340C_A | 1.715548 | 0.221036 | 30515195 |
| C7_00420C_A | 1.715127 | 0.237371 | 3638032  |
| SIW14       | 1.714805 | 0.264672 | 3647323  |
| C1_02060W_A | 1.711216 | 0.284246 | 30514968 |
| C4_01670C_A | 1.707199 | 0.169437 | 3635711  |
| ARP8        | 1.705903 | 0.047265 | 3640200  |
| C5_02060W_A | 1.705741 | 0.384386 | 3643748  |
| RPC19       | 1.705    | 0.282074 | 3647693  |
| MRPL8       | 1.704384 | 0.074237 | 3646039  |
| HYM1        | 1.702127 | 0.130565 | 3637355  |
| DAK2        | 1.702126 | 0.08514  | 3634895  |
| C2_03530W_A | 1.69863  | 0.079683 | 3637341  |
| C4_02590C_A | 1.697847 | 0.099274 | 3637913  |
| C7_02780W_A | 1.696882 | 0.04356  | 3641361  |
| C2_10060C_A | 1.696493 | 0.428903 | 3643948  |
| SMF12       | 1.693281 | 0.063044 | 3643509  |
| C6_04120C_A | 1.691959 | 0.25342  | 3647974  |
| GPA2        | 1.691513 | 0.081938 | 3636638  |
| CDC55       | 1.691208 | 0.040411 | 3635785  |
| CR_09240C_A | 1.690598 | 0.122406 | 3641919  |
| DRG1        | 1.690168 | 0.068923 | 3640714  |
| ZDS1        | 1.687395 | 0.049188 | 3641103  |
| URE2        | 1.686209 | 0.101372 | 3647795  |
| C7_03370C_A | 1.685043 | 0.102852 | 3646720  |
| MRS2        | 1.684168 | 0.207088 | 3640110  |
| RAM2        | 1.683727 | 0.142908 | 3634767  |
| RPS27       | 1.683568 | 0.052348 | 30515429 |
| C2_00400C_A | 1.683069 | 0.10917  | 3638821  |
| KRE30       | 1.682502 | 0.088907 | 3642311  |
| C4_00170W_A | 1.68033  | 0.038399 | 3645028  |
| C2_06440C_A | 1.680145 | 0.11575  | 3646565  |
| CR_02700W_A | 1.678987 | 0.322074 | 3642575  |
| C7_03990C_A | 1.676032 | 0.13404  | 3643115  |
| C6_00430C_A | 1.675806 | 0.111678 | 3646089  |
| CCT6        | 1.674828 | 0.032335 | 3642914  |
| C6_03990C_A | 1.672386 | 0.398077 | 3640271  |
| CR_02430C_A | 1.670386 | 0.042003 | 3644924  |
| C6_03620C_A | 1.669919 | 0.193019 | 3640297  |
| SSZ1        | 1.669859 | 0.074942 | 3641139  |
| RAS1        | 1.669569 | 0.040613 | 3643927  |
| KRE9        | 1.668514 | 0.097087 | 3635183  |

|             |          |          |          |
|-------------|----------|----------|----------|
| LCB4        | 1.668312 | 0.218758 | 3642057  |
| SEC1        | 1.66791  | 0.050913 | 3636935  |
| MIA40       | 1.665089 | 0.052968 | 3636866  |
| IMP2        | 1.662591 | 0.301119 | 3642636  |
| ARO1        | 1.658733 | 0.060211 | 3635680  |
| C1_12670C_A | 1.658093 | 0.199931 | 3646834  |
| C5_02390C_A | 1.657633 | 0.086176 | 3637795  |
| FGR24       | 1.656923 | 0.159545 | 3643288  |
| C1_08920W_A | 1.654582 | 0.123156 | 3634910  |
| FAV3        | 1.651382 | 0.29405  | 3647911  |
| MCM1        | 1.650336 | 0.083693 | 3638050  |
| CR_02680W_A | 1.650326 | 0.364229 | 3642573  |
| ABP2        | 1.647954 | 0.443384 | 3643443  |
| C2_00320W_A | 1.647772 | 0.200818 | 3638798  |
| C2_05410W_A | 1.647707 | 0.090628 | 30515120 |
| C3_06710W_A | 1.646142 | 0.123954 | 3638448  |
| CR_07470W_A | 1.644653 | 0.331335 | 3646048  |
| PXA1        | 1.644555 | 0.045199 | 3639713  |
| C1_10810W_A | 1.643057 | 0.60053  | 3644436  |
| C1_12110C_A | 1.642612 | 0.602475 | 3642054  |
| CR_03020C_A | 1.641533 | 0.267396 | 3642598  |
| C3_01220W_A | 1.641042 | 0.270181 | 3636610  |
| C2_04360W_A | 1.639936 | 0.141417 | 3645461  |
| C1_03960C_A | 1.639449 | 0.178943 | 3646418  |
| RPP1        | 1.636479 | 0.215972 | 3644681  |
| C3_06110C_A | 1.634842 | 0.0926   | 3641761  |
| FOL1        | 1.634772 | 0.135281 | 3644123  |
| IFD3        | 1.631194 | 0.256225 | 3640211  |
| SMD3        | 1.631158 | 0.336686 | 3647060  |
| GIS2        | 1.630014 | 0.056742 | 3643744  |
| TOM7        | 1.627639 | 0.263095 | 30515355 |
| C1_06720C_A | 1.62554  | 0.248147 | 3639509  |
| C1_10320W_A | 1.624992 | 0.291244 | 3634907  |
| PCK1        | 1.624373 | 0.073004 | 3639701  |
| COX8        | 1.622553 | 0.096191 | 30515130 |
| C1_02160W_A | 1.6224   | 0.288723 | 3644584  |
| DAM1        | 1.619116 | 0.234774 | 3634820  |
| EDC3        | 1.616811 | 0.20901  | 3646152  |
| CR_03240C_A | 1.61549  | 0.223367 | 3645126  |
| C6_01200W_A | 1.613877 | 0.531877 | 3644041  |
| C1_03040W_A | 1.613133 | 0.181822 | 3636842  |
| GRE3        | 1.612684 | 0.217261 | 3637811  |
| RCE1        | 1.612676 | 0.227999 | 3641104  |
| RTT101      | 1.612333 | 0.146461 | 3639827  |
| C1_05630C_A | 1.611764 | 0.112528 | 3639840  |
| NGG1        | 1.611357 | 0.112326 | 3636902  |
| C3_03830W_A | 1.610868 | 0.23652  | 3645630  |



|             |          |          |          |
|-------------|----------|----------|----------|
| C4_06170C_A | 1.610395 | 0.146085 | 3642818  |
| RPL39       | 1.609757 | 0.079515 | 30515109 |
| C3_00850C_A | 1.609685 | 0.115568 | 3647748  |
| C2_08720W_A | 1.607272 | 0.164504 | 3643885  |
| IMP1        | 1.606572 | 0.319059 | 3636881  |
| C2_05570C_A | 1.604972 | 0.253293 | 3645562  |
| C3_00960W_A | 1.603408 | 0.296391 | 3639853  |
| RPT4        | 1.6034   | 0.046129 | 3640966  |
| C5_02450W_A | 1.603329 | 0.138103 | 3637729  |
| MED22       | 1.602949 | 0.418486 | 3640217  |
| C5_00040C_A | 1.602268 | 0.054446 | 3647874  |
| GCV3        | 1.601818 | 0.073334 | 3636194  |
| C3_05150W_A | 1.601599 | 0.156879 | 3635162  |
| C1_13750C_A | 1.601282 | 0.473619 | 3636137  |
| CHT3        | 1.600503 | 0.540427 | 3638967  |
| C1_14030W_A | 1.600205 | 0.144134 | 3643340  |
| C3_05320W_A | 1.599143 | 0.089033 | 3643648  |
| VPS11       | 1.598783 | 0.171295 | 3646524  |
| C1_06640C_A | 1.598577 | 0.382011 | 30515010 |
| HRT1        | 1.5976   | 0.244969 | 30515187 |
| RPC40       | 1.597172 | 0.098908 | 3643427  |
| C6_03390W_A | 1.595838 | 0.159937 | 3639232  |
| CR_01020C_A | 1.595075 | 0.219699 | 3640420  |
| ETR1        | 1.594892 | 0.110002 | 3640561  |
| KIP2        | 1.594776 | 0.41143  | 3643954  |
| TRR1        | 1.594755 | 0.078835 | 3637778  |
| C7_00920C_A | 1.593204 | 0.215895 | 3637957  |
| SSP96       | 1.592623 | 0.561292 | 3641401  |
| C7_04240C_A | 1.591534 | 0.082798 | 3643165  |
| C5_04580C_A | 1.590775 | 0.395487 | 3636511  |
| C6_02160W_A | 1.590554 | 0.394666 | 3645889  |
| RAD32       | 1.590464 | 0.220404 | 3637340  |
| C5_02230W_A | 1.590277 | 0.082474 | 3637708  |
| IPK1        | 1.58993  | 0.213346 | 3648091  |
| GUK1        | 1.58945  | 0.24373  | 3647231  |
| C5_03490C_A | 1.589193 | 0.100167 | 3646967  |
| C1_13370W_A | 1.588907 | 0.214927 | 3636216  |
| RPS19A      | 1.58875  | 0.13043  | 30515208 |
| NCB2        | 1.588149 | 0.159125 | 3643028  |
| PGA56       | 1.58677  | 0.081192 | 30515313 |
| C3_06830C_A | 1.586416 | 0.087503 | 3638543  |
| RAD23       | 1.586229 | 0.076742 | 3635834  |
| C2_00290W_A | 1.585452 | 0.311499 | 3638801  |
| PKC1        | 1.585445 | 0.077663 | 3635210  |
| C1_00530C_A | 1.585328 | 0.112887 | 3639368  |
| MXR1        | 1.584685 | 0.147375 | 3638881  |
| SLA1        | 1.58326  | 0.107788 | 3635739  |

|             |          |          |         |
|-------------|----------|----------|---------|
| C1_09620C_A | 1.581803 | 0.248644 | 3634892 |
| TIP41       | 1.5816   | 0.243505 | 3636506 |
| C1_04640W_A | 1.578145 | 0.189616 | 3644761 |
| RDH54       | 1.577896 | 0.227947 | 3641231 |
| STT4        | 1.57748  | 0.078702 | 3647963 |
| C2_05520W_A | 1.576299 | 0.335224 | 3643421 |
| MIS12       | 1.575796 | 0.114099 | 3639669 |
| CR_00470W_A | 1.572253 | 0.119351 | 3639725 |
| C5_00580W_A | 1.571526 | 0.214386 | 3641588 |
| UBP6        | 1.571046 | 0.093119 | 3639317 |
| MRPL10      | 1.570786 | 0.132611 | 3643446 |
| VPS16       | 1.57055  | 0.180893 | 3646150 |
| C2_06710W_A | 1.570487 | 0.415858 | 3648020 |
| C1_11890W_A | 1.570082 | 0.222908 | 3642006 |
| C1_06710W_A | 1.56983  | 0.223027 | 3639510 |
| PRE10       | 1.568874 | 0.08945  | 3636957 |
| MSU1        | 1.568763 | 0.22359  | 3643919 |
| C3_05410W_A | 1.565742 | 0.060637 | 3643665 |
| SRB9        | 1.565181 | 0.162212 | 3635845 |
| FUN12       | 1.562138 | 0.123527 | 3640713 |
| GAP1        | 1.560465 | 0.121193 | 3637806 |
| C6_02640C_A | 1.560197 | 0.168914 | 3639222 |
| RCT1        | 1.560118 | 0.099879 | 3641727 |
| C6_00240C_A | 1.55906  | 0.282385 | 3646062 |
| GAR1        | 1.558388 | 0.104939 | 3645332 |
| PIN4        | 1.558324 | 0.115206 | 3640101 |
| C3_06990W_A | 1.558303 | 0.439491 | 3638521 |
| C4_06590W_A | 1.55683  | 0.267886 | 3642778 |
| SET3        | 1.555964 | 0.110577 | 3643320 |
| DCW1        | 1.55539  | 0.090196 | 3638842 |
| C4_07150W_A | 1.555345 | 0.317836 | 3642935 |
| REV3        | 1.55429  | 0.253175 | 3641749 |
| HEM4        | 1.553652 | 0.431715 | 3643942 |
| GDS1        | 1.553629 | 0.081962 | 3642626 |
| UME1        | 1.553366 | 0.106396 | 3643101 |
| EFH1        | 1.553049 | 0.654867 | 3646929 |
| SOD4        | 1.552817 | 0.450481 | 3638888 |
| C7_01190W_A | 1.550849 | 0.340066 | 3645902 |
| C2_10730W_A | 1.546751 | 0.572908 | 3641210 |
| C2_05080C_A | 1.545339 | 0.290632 | 3643453 |
| CDC48       | 1.545101 | 0.100206 | 3644440 |
| C6_00080C_A | 1.542937 | 0.342636 | 3647899 |
| CCT7        | 1.541878 | 0.08552  | 3643734 |
| C1_09350W_A | 1.5394   | 0.171039 | 3634805 |
| C1_11140W_A | 1.537588 | 0.234436 | 3644410 |
| ECM4        | 1.536853 | 0.095055 | 3640144 |
| AGO1        | 1.536833 | 0.140387 | 3642828 |

|             |          |          |          |
|-------------|----------|----------|----------|
| C1_02000W_A | 1.535307 | 0.192904 | 3645418  |
| C2_07360W_A | 1.534162 | 0.268795 | 3645236  |
| C1_00410C_A | 1.534026 | 0.281541 | 3639287  |
| PGI1        | 1.533611 | 0.188137 | 3644847  |
| CHK1        | 1.533021 | 0.133418 | 3637394  |
| IFD6        | 1.532564 | 0.431706 | 3644703  |
| RIA1        | 1.529532 | 0.111406 | 3644478  |
| C2_02700C_A | 1.529176 | 0.364009 | 3643005  |
| NGT1        | 1.526874 | 0.658545 | 3640573  |
| C7_03690W_A | 1.526814 | 0.656042 | 3647862  |
| C3_04350C_A | 1.526656 | 0.657377 | 3635275  |
| TLO16       | 1.5264   | 0.660626 | 3643137  |
| CBK1        | 1.525388 | 0.078334 | 3634838  |
| CR_05700C_A | 1.524434 | 0.204686 | 3646701  |
| COX7        | 1.524293 | 0.189876 | 3638339  |
| ARV1        | 1.523869 | 0.530239 | 3635248  |
| CR_10820W_A | 1.52301  | 0.285795 | 3638958  |
| C1_08390C_A | 1.52286  | 0.176249 | 3646504  |
| RHO2        | 1.522605 | 0.468983 | 30515143 |
| C2_07030C_A | 1.522289 | 0.253949 | 3643498  |
| CR_05840W_A | 1.522245 | 0.357583 | 3646704  |
| TIF35       | 1.521882 | 0.104746 | 3643308  |
| PGA1        | 1.52147  | 0.314142 | 3638980  |
| C3_07330W_A | 1.521364 | 0.55422  | 3638478  |
| C7_02510W_A | 1.521319 | 0.294422 | 30515357 |
| C1_13190W_A | 1.517774 | 0.110497 | 3636163  |
| C4_05820W_A | 1.517587 | 0.36621  | 30515277 |
| C4_02680C_A | 1.516643 | 0.550695 | 3637828  |
| SAM50       | 1.515927 | 0.329052 | 3641721  |
| PR26        | 1.514159 | 0.106154 | 3642981  |
| SAM2        | 1.51289  | 0.133018 | 3644538  |
| VPS17       | 1.511969 | 0.128503 | 3640218  |
| C3_04370C_A | 1.510332 | 0.155146 | 3635172  |
| CR_07840C_A | 1.509876 | 0.278781 | 3647346  |
| CR_06020W_A | 1.50874  | 0.484213 | 3644873  |
| C2_01220W_A | 1.508153 | 0.111838 | 3638856  |
| RPN3        | 1.506958 | 0.130737 | 3636917  |
| MET18       | 1.505949 | 0.308216 | 3636631  |
| TIF34       | 1.505719 | 0.135762 | 3636872  |
| C7_04310C_A | 1.505238 | 0.237939 | 3643141  |
| C4_04870C_A | 1.505058 | 0.12568  | 3641160  |
| C3_06050C_A | 1.504588 | 0.196505 | 3641746  |
| CTA1        | 1.502483 | 0.209019 | 3641631  |
| C4_06960W_A | 1.50223  | 0.459254 | 3642926  |
| C4_03680C_A | 1.501847 | 0.312937 | 3645363  |
| CSH3        | 1.501519 | 0.205022 | 3646798  |
| MED5        | 1.500649 | 0.197979 | 3648211  |

|             |          |          |          |
|-------------|----------|----------|----------|
| SFI1        | 1.500506 | 0.198349 | 3641385  |
| CR_10260W_A | 1.500219 | 0.371997 | 3638932  |
| C6_01220C_A | 1.499725 | 0.174337 | 3644042  |
| C7_03610C_A | 1.499575 | 0.163214 | 3646241  |
| GDH3        | 1.497463 | 0.231638 | 3648086  |
| C2_03800C_A | 1.495575 | 0.108751 | 3637401  |
| C3_01910C_A | 1.493366 | 0.286293 | 30515182 |
| CR_06570C_A | 1.492351 | 0.157153 | 3648366  |
| C3_01800C_A | 1.490198 | 0.205432 | 3636586  |
| PHO91       | 1.489134 | 0.115701 | 3644588  |
| RPS9B       | 1.488111 | 0.159386 | 30515104 |
| MRP7        | 1.487958 | 0.193717 | 3643118  |
| GSG1        | 1.487688 | 0.394528 | 3647609  |
| C1_04460C_A | 1.486867 | 0.499971 | 3646140  |
| C1_13320C_A | 1.486608 | 0.170962 | 3636149  |
| CR_00380W_A | 1.486507 | 0.490994 | 3639682  |
| APN2        | 1.485764 | 0.286888 | 3647674  |
| IRS4        | 1.484595 | 0.23718  | 3645650  |
| C4_01650C_A | 1.484564 | 0.282063 | 3635713  |
| CLN3        | 1.484551 | 0.150374 | 3642624  |
| C6_03540W_A | 1.48323  | 0.188263 | 3640244  |
| PHO81       | 1.482919 | 0.274193 | 3639662  |
| KIN2        | 1.481797 | 0.152619 | 3639697  |
| YPT1        | 1.481498 | 0.124248 | 3636915  |
| MRPL33      | 1.481486 | 0.371298 | 30515175 |
| CR_04300W_A | 1.479365 | 0.139822 | 3640995  |
| C1_06400C_A | 1.479085 | 0.173855 | 3639557  |
| C1_14040W_A | 1.477918 | 0.230641 | 3643342  |
| C2_04790C_A | 1.474337 | 0.214887 | 3647779  |
| C2_09810C_A | 1.472627 | 0.391964 | 3643802  |
| CR_06260W_A | 1.471764 | 0.318904 | 3644853  |
| DLD1        | 1.470655 | 0.312478 | 3643025  |
| NAP1        | 1.469828 | 0.188713 | 3639714  |
| C3_00730W_A | 1.469277 | 0.247547 | 3640530  |
| C4_04240C_A | 1.469022 | 0.16291  | 3646856  |
| MEX67       | 1.4685   | 0.161166 | 3641020  |
| C1_00660C_A | 1.468333 | 0.233074 | 3639376  |
| CR_05120W_A | 1.46819  | 0.133265 | 3646402  |
| C5_05510C_A | 1.467317 | 0.835051 | 3636476  |
| C2_06630C_A | 1.467317 | 0.835139 | 30515141 |
| KCH1        | 1.466392 | 0.282099 | 3636988  |
| MET8        | 1.466106 | 0.302029 | 3638533  |
| LPT1        | 1.464883 | 0.239128 | 3645212  |
| C3_07110W_A | 1.463247 | 0.301377 | 3638442  |
| GPI19       | 1.461356 | 0.567618 | 3643471  |
| C1_06420C_A | 1.461247 | 0.281084 | 3639554  |
| C1_04850C_A | 1.460794 | 0.565051 | 30514989 |

|             |          |          |         |
|-------------|----------|----------|---------|
| GDT1        | 1.460722 | 0.222358 | 3645445 |
| RVB2        | 1.459918 | 0.135361 | 3637055 |
| IST1        | 1.458548 | 0.418958 | 3640587 |
| BUD23       | 1.458371 | 0.333815 | 3642629 |
| C6_03880W_A | 1.454434 | 0.225074 | 3640293 |
| AMN1        | 1.453729 | 0.455858 | 3635795 |
| MNN11       | 1.453109 | 0.370811 | 3636792 |
| MEP1        | 1.451524 | 0.348975 | 3636553 |
| C2_00630C_A | 1.450948 | 0.644017 | 3638848 |
| TES1        | 1.450483 | 0.521268 | 3647480 |
| C1_03630W_A | 1.449117 | 0.257759 | 3636882 |
| CR_06930W_A | 1.448816 | 0.392504 | 3648382 |
| PDC2        | 1.448757 | 0.261087 | 3634862 |
| MNN15       | 1.448339 | 0.345597 | 3644794 |
| C1_05380C_A | 1.448272 | 0.246258 | 3642480 |
| ARH2        | 1.447824 | 0.457123 | 3643411 |
| C2_04300C_A | 1.446588 | 0.366823 | 3648276 |
| C2_02720W_A | 1.445223 | 0.13177  | 3643002 |
| C5_03690W_A | 1.443949 | 0.503051 | 3646989 |
| VPS2        | 1.443434 | 0.280615 | 3641546 |
| SMP2        | 1.443071 | 0.225231 | 3635779 |
| C3_03210W_A | 1.442962 | 0.519735 | 3638315 |
| QDR1        | 1.441976 | 0.180301 | 3640941 |
| C3_07030C_A | 1.440965 | 0.281889 | 3638517 |
| AVT1        | 1.440514 | 0.265049 | 3646928 |
| LAP3        | 1.440323 | 0.356053 | 3641012 |
| C3_05290C_A | 1.439786 | 0.642625 | 3635203 |
| ALS3        | 1.439167 | 0.138379 | 3647965 |
| C1_05950C_A | 1.438741 | 0.354527 | 3639859 |
| C3_00270C_A | 1.434904 | 0.190949 | 3640527 |
| C1_05660C_A | 1.433509 | 0.177667 | 3639900 |
| C5_02350C_A | 1.432753 | 0.555299 | 3637791 |
| C7_01230C_A | 1.4303   | 0.224799 | 3645906 |
| C4_05630W_A | 1.430101 | 0.268222 | 3641812 |
| C1_01940C_A | 1.42919  | 0.440371 | 3645422 |
| C1_05210C_A | 1.428434 | 0.203063 | 3642465 |
| C1_03460C_A | 1.427704 | 0.391932 | 3636911 |
| SSN3        | 1.426904 | 0.271906 | 3637353 |
| SAP1        | 1.424321 | 0.569326 | 3640256 |
| C7_01670W_A | 1.424279 | 0.605753 | 3636982 |
| AGP2        | 1.42311  | 0.227162 | 3635684 |
| CR_07340C_A | 1.422332 | 0.270891 | 3646056 |
| XKS1        | 1.421676 | 0.22006  | 3648306 |
| C4_02100C_A | 1.421428 | 0.516805 | 3635641 |
| DDI1        | 1.4203   | 0.206846 | 3643295 |
| C3_06810W_A | 1.417834 | 0.348352 | 3638545 |
| C5_01190W_A | 1.41782  | 0.273583 | 3642659 |

|             |          |          |          |
|-------------|----------|----------|----------|
| C2_03130W_A | 1.415911 | 0.344066 | 3642993  |
| C2_10670W_A | 1.415786 | 0.171047 | 3641251  |
| YOR1        | 1.415727 | 0.214433 | 3643964  |
| C1_03910C_A | 1.415653 | 0.378661 | 3646412  |
| RAD14       | 1.415503 | 0.353957 | 3636953  |
| C4_00320C_A | 1.414837 | 0.439871 | 3644999  |
| CWC22       | 1.414702 | 0.334552 | 3643938  |
| C3_07140C_A | 1.414541 | 0.521177 | 3638439  |
| CR_04720C_A | 1.414326 | 0.153282 | 3648140  |
| SLF1        | 1.414065 | 0.36882  | 3638500  |
| C1_05220C_A | 1.413956 | 0.600561 | 3642464  |
| C4_02950C_A | 1.413407 | 0.652423 | 3637874  |
| C1_09910C_A | 1.413245 | 0.527314 | 3634798  |
| RBP1        | 1.413024 | 0.254657 | 3647647  |
| VPH1        | 1.412931 | 0.119829 | 3646157  |
| VMA22       | 1.410785 | 0.721017 | 3647086  |
| DAL7        | 1.410639 | 0.716547 | 3636130  |
| C6_00630W_A | 1.410583 | 0.716619 | 3647135  |
| C6_03070C_A | 1.410493 | 0.71649  | 3639272  |
| TLO5        | 1.410493 | 0.716848 | 3647926  |
| GLY1        | 1.410339 | 0.173344 | 3647181  |
| C6_02200C_A | 1.410291 | 0.723467 | 3645863  |
| C2_08750W_A | 1.410201 | 0.723693 | 3643881  |
| SKI8        | 1.409773 | 0.276572 | 3640294  |
| POL5        | 1.407513 | 0.269191 | 3639254  |
| STR2        | 1.407465 | 0.13234  | 3644689  |
| C6_02420W_A | 1.407453 | 0.268632 | 3645885  |
| TIM50       | 1.406134 | 0.181076 | 3644530  |
| VRP1        | 1.405483 | 0.345061 | 3642293  |
| PAP1        | 1.405405 | 0.245873 | 3643763  |
| TKL1        | 1.40513  | 0.360907 | 3640767  |
| C7_02540W_A | 1.404788 | 0.366226 | 3636939  |
| C7_04010W_A | 1.403941 | 0.244336 | 3643112  |
| MED14       | 1.401457 | 0.22995  | 3637800  |
| GPM1        | 1.401452 | 0.255127 | 3637431  |
| C5_03170C_A | 1.400359 | 0.295727 | 3637801  |
| C3_04380C_A | 1.399892 | 0.225589 | 3635173  |
| C6_02090C_A | 1.399625 | 0.231908 | 6335445  |
| DBF2        | 1.399541 | 0.406052 | 3648101  |
| CR_04750W_A | 1.398422 | 0.471901 | 30515399 |
| C1_07400C_A | 1.398346 | 0.290425 | 3644464  |
| C2_07220W_A | 1.398328 | 0.199962 | 3643483  |
| C3_05420W_A | 1.397854 | 0.29029  | 3643666  |
| C4_04750W_A | 1.397491 | 0.298321 | 3641133  |
| CR_09150W_A | 1.397462 | 0.47073  | 3641880  |
| BMT8        | 1.397418 | 0.382825 | 3637442  |
| YDJ1        | 1.397311 | 0.209588 | 3640939  |

|             |          |          |          |
|-------------|----------|----------|----------|
| C1_02390W_A | 1.396923 | 0.285282 | 3636791  |
| C1_04630C_A | 1.395731 | 0.242807 | 3644762  |
| CR_01120C_A | 1.395227 | 0.272521 | 3640434  |
| C3_02200W_A | 1.395104 | 0.852125 | 30515185 |
| C7_02210W_A | 1.395104 | 0.85221  | 3636990  |
| KAR5        | 1.394959 | 0.851266 | 3644049  |
| ATO5        | 1.394959 | 0.851292 | 3643652  |
| C6_01130W_A | 1.394959 | 0.851514 | 3644055  |
| PGA34       | 1.394959 | 0.851713 | 3642579  |
| CR_01920W_A | 1.394959 | 0.851781 | 3640096  |
| C6_02620C_A | 1.394959 | 0.851852 | 3639211  |
| C4_05220C_A | 1.394603 | 0.489429 | 3646155  |
| C1_04600C_A | 1.391169 | 0.207401 | 3646133  |
| C6_00800C_A | 1.391165 | 0.206452 | 3647069  |
| CR_00830W_A | 1.390988 | 0.55613  | 3640412  |
| C1_03690W_A | 1.389889 | 0.257417 | 3648426  |
| C1_02720W_A | 1.389806 | 0.361452 | 3636825  |
| C3_07420W_A | 1.389232 | 0.221522 | 3638485  |
| ECM29       | 1.388276 | 0.157432 | 3638433  |
| CR_09190C_A | 1.388264 | 0.418008 | 3641885  |
| PHO8        | 1.388117 | 0.679016 | 3647179  |
| C1_13180W_A | 1.387146 | 0.857361 | 3636162  |
| RFC52       | 1.387146 | 0.857368 | 30514953 |
| C5_05270C_A | 1.386231 | 0.29865  | 3636496  |
| RPS10       | 1.384551 | 0.278702 | 30515149 |
| PCT1        | 1.38445  | 0.224946 | 3645743  |
| C4_03700W_A | 1.383624 | 0.327062 | 3645361  |
| C1_08160W_A | 1.383471 | 0.261776 | 3640733  |
| C2_01230W_A | 1.383104 | 0.492811 | 3638795  |
| VPS4        | 1.380471 | 0.313904 | 3637703  |
| LKH1        | 1.379202 | 0.192304 | 3647187  |
| C2_05710C_A | 1.379151 | 0.244898 | 30515127 |
| CR_06780W_A | 1.378866 | 0.263035 | 3647312  |
| C1_02740C_A | 1.378029 | 0.587555 | 3636827  |
| SNF4        | 1.378005 | 0.22976  | 3640264  |
| CR_06790C_A | 1.377997 | 0.475216 | 3647311  |
| CR_07310W_A | 1.377306 | 0.405217 | 3646058  |
| SHE9        | 1.377149 | 0.311653 | 3642984  |
| C4_03040W_A | 1.37589  | 0.428339 | 30515253 |
| C4_00500W_A | 1.374854 | 0.250291 | 3648379  |
| C1_04230W_A | 1.37427  | 0.263341 | 3644722  |
| MED21       | 1.371748 | 0.510602 | 3639010  |
| C1_04530C_A | 1.370337 | 0.32081  | 3646149  |
| HLJ1        | 1.369185 | 0.33753  | 3643158  |
| C4_04500C_A | 1.368627 | 0.324258 | 3641123  |
| C3_03930W_A | 1.368368 | 0.349107 | 3645657  |
| C2_05960C_A | 1.367255 | 0.639411 | 3647479  |

|             |          |          |          |
|-------------|----------|----------|----------|
| MTW1        | 1.367079 | 0.635708 | 3643783  |
| C2_07200W_A | 1.364855 | 0.55809  | 3643481  |
| C1_03620C_A | 1.364521 | 0.319319 | 30514981 |
| C2_02620W_A | 1.362394 | 0.336583 | 3635838  |
| SUA72       | 1.357766 | 0.49743  | 3648239  |
| C1_08860C_A | 1.357234 | 0.320026 | 3634921  |
| C3_05120C_A | 1.353982 | 0.334032 | 3635159  |
| GPI13       | 1.353263 | 0.439411 | 3637424  |
| NUP85       | 1.352901 | 0.246746 | 3635175  |
| C2_02660W_A | 1.351601 | 0.531498 | 3643009  |
| UGA11       | 1.350969 | 0.530325 | 3637437  |
| THI6        | 1.350379 | 0.576841 | 3638333  |
| RER2        | 1.347854 | 0.293281 | 3636399  |
| C2_08690C_A | 1.347724 | 0.625747 | 3643888  |
| HGH1        | 1.347155 | 0.39174  | 3635647  |
| C5_03880C_A | 1.346071 | 0.698292 | 3647222  |
| C4_00210W_A | 1.346037 | 0.698169 | 3645032  |
| NUP188      | 1.345528 | 0.25026  | 3634858  |
| C2_00820W_A | 1.3453   | 0.316206 | 3638809  |
| VPS53       | 1.343724 | 0.258201 | 3639319  |
| C6_01560W_A | 1.342188 | 0.611391 | 3641652  |
| C7_02350C_A | 1.341462 | 0.371232 | 3636932  |
| TRY5        | 1.340447 | 0.597059 | 3641619  |
| C1_11560C_A | 1.34018  | 0.485427 | 3645331  |
| C7_00910C_A | 1.339758 | 0.384328 | 3637958  |
| C6_04370W_A | 1.338882 | 0.419394 | 3646294  |
| ISN1        | 1.338854 | 0.195681 | 3640196  |
| SCT2        | 1.338672 | 0.435089 | 3643018  |
| C5_03100C_A | 1.338636 | 0.339848 | 3637704  |
| PRE9        | 1.338378 | 0.351354 | 3638311  |
| ENO1        | 1.338141 | 0.355642 | 3646493  |
| CR_04450C_A | 1.337739 | 0.274503 | 3640987  |
| C2_08630C_A | 1.337431 | 0.279834 | 3643910  |
| MRPL3       | 1.335823 | 0.304483 | 3640722  |
| C1_06560W_A | 1.335165 | 0.448126 | 3639517  |
| GCN20       | 1.334425 | 0.251785 | 3639314  |
| C3_01950C_A | 1.333765 | 0.346183 | 3636599  |
| DAO1        | 1.333548 | 0.477071 | 3636885  |
| C4_02620C_A | 1.331163 | 0.342434 | 3637834  |
| C1_11010C_A | 1.330378 | 0.441488 | 3644421  |
| C4_04130W_A | 1.329918 | 0.418589 | 3641221  |
| ASR2        | 1.329497 | 0.366435 | 3641907  |
| SUR7        | 1.32918  | 0.278486 | 3641610  |
| C3_02090C_A | 1.32897  | 0.437131 | 3636661  |
| IDI1        | 1.328791 | 0.319703 | 3637894  |
| SIK1        | 1.328772 | 0.369698 | 3638925  |
| MDL2        | 1.328575 | 0.351917 | 3639256  |



|             |          |          |          |
|-------------|----------|----------|----------|
| C1_07990C_A | 1.327953 | 0.424883 | 3640697  |
| C1_05520W_A | 1.326681 | 0.597051 | 3642505  |
| C1_03280W_A | 1.326475 | 0.318423 | 3636901  |
| C1_12280C_A | 1.32626  | 0.591321 | 3642019  |
| GPI2        | 1.326225 | 0.587729 | 3641011  |
| C3_06260C_A | 1.325572 | 0.383434 | 3642240  |
| MAL31       | 1.325313 | 0.777506 | 3636420  |
| C4_01950W_A | 1.324756 | 0.318833 | 3635665  |
| C3_00360W_A | 1.324648 | 0.333336 | 3640542  |
| SUP35       | 1.323536 | 0.329255 | 3643785  |
| C7_01010W_A | 1.32267  | 0.799067 | 3638021  |
| FGR14       | 1.322365 | 0.264492 | 3648083  |
| C7_04170W_A | 1.321703 | 0.692935 | 3643126  |
| C5_03710C_A | 1.320234 | 0.673183 | 3647240  |
| C3_05400C_A | 1.319861 | 0.682048 | 3643681  |
| CR_06850C_A | 1.319726 | 0.685268 | 30515424 |
| PRO1        | 1.318474 | 0.257321 | 3639000  |
| C2_05390C_A | 1.317761 | 0.781188 | 3643434  |
| NOP1        | 1.317732 | 0.352653 | 3642947  |
| POT1        | 1.316368 | 0.328057 | 3639707  |
| GCD11       | 1.316143 | 0.276842 | 3637755  |
| PIM1        | 1.315241 | 0.296827 | 3640999  |
| C4_06770W_A | 1.314223 | 0.384566 | 3642920  |
| SGO1        | 1.313983 | 0.472075 | 3643464  |
| CAS5        | 1.313573 | 0.280924 | 3635652  |
| C4_05400C_A | 1.312655 | 0.332833 | 3646952  |
| NOP15       | 1.311418 | 0.336747 | 3637966  |
| TIM23       | 1.310756 | 0.36149  | 3643777  |
| C1_01400C_A | 1.310177 | 0.347241 | 3640237  |
| C4_03080W_A | 1.307893 | 0.296726 | 3637928  |
| NAT5        | 1.30697  | 0.464088 | 3641022  |
| C6_00500C_A | 1.306084 | 0.563318 | 3647149  |
| C5_03670C_A | 1.30404  | 0.504113 | 3646987  |
| PRK1        | 1.302704 | 0.274695 | 3640153  |
| RPT5        | 1.302257 | 0.302844 | 3642911  |
| C1_14310W_A | 1.302007 | 0.449866 | 3643315  |
| C1_10680C_A | 1.301509 | 0.372745 | 3647678  |
| SEC15       | 1.300978 | 0.305662 | 3646845  |
| PUS4        | 1.300226 | 0.344808 | 3642661  |
| RPL7        | 1.299336 | 0.419045 | 6335362  |
| C3_01820W_A | 1.298655 | 0.439871 | 3636584  |
| CDC15       | 1.298652 | 0.361965 | 3643459  |
| C1_12900W_A | 1.298241 | 0.459652 | 3636154  |
| CR_03130W_A | 1.297519 | 0.616419 | 3645121  |
| C5_02040W_A | 1.29724  | 0.400364 | 3643769  |
| PHO23       | 1.295503 | 0.363544 | 3643926  |
| IFI3        | 1.295502 | 0.724159 | 3644694  |

|             |          |          |          |
|-------------|----------|----------|----------|
| PEA2        | 1.294793 | 0.41033  | 3647673  |
| C4_03300C_A | 1.294769 | 0.79124  | 30515254 |
| PHO113      | 1.294501 | 0.78762  | 3644946  |
| C2_07700C_A | 1.294417 | 0.787428 | 3642337  |
| C1_02040C_A | 1.294233 | 0.297296 | 3644586  |
| GAD1        | 1.293607 | 0.473802 | 3645339  |
| C1_04790W_A | 1.293341 | 0.410824 | 3644772  |
| C5_00950C_A | 1.293064 | 0.352537 | 3642653  |
| CR_01950W_A | 1.292897 | 0.40054  | 3640107  |
| ZCF17       | 1.292632 | 0.454786 | 3640205  |
| C4_04820C_A | 1.291766 | 0.416407 | 3641165  |
| GAT1        | 1.291577 | 0.520701 | 3641794  |
| NSP1        | 1.291263 | 0.380424 | 3637430  |
| C3_02580C_A | 1.291041 | 0.621964 | 3638376  |
| RPN5        | 1.29078  | 0.274633 | 3636405  |
| RAD59       | 1.290443 | 0.6114   | 3648281  |
| C4_05180C_A | 1.289943 | 0.319242 | 3647413  |
| C5_01310W_A | 1.289148 | 0.634874 | 3642645  |
| TEA1        | 1.289041 | 0.384212 | 3643671  |
| C2_09070C_A | 1.286985 | 0.439816 | 3644111  |
| C4_00740W_A | 1.286214 | 0.610197 | 3645764  |
| C4_02670W_A | 1.285699 | 0.498757 | 3637830  |
| RPS42       | 1.283952 | 0.396555 | 3640195  |
| C5_03550W_A | 1.281231 | 0.27474  | 3646973  |
| C5_03470C_A | 1.280893 | 0.41266  | 3646963  |
| C2_05040C_A | 1.280039 | 0.347197 | 3643449  |
| C1_12470W_A | 1.279444 | 0.747374 | 3648182  |
| PGA15       | 1.279312 | 0.747505 | 3642781  |
| C3_01120W_A | 1.278918 | 0.557362 | 3639836  |
| CR_07220C_A | 1.278418 | 0.570535 | 3646040  |
| C5_04300C_A | 1.278089 | 0.400359 | 3636456  |
| C6_03150C_A | 1.278055 | 0.447022 | 3639257  |
| APR1        | 1.277918 | 0.385536 | 3645204  |
| SUI1        | 1.277517 | 0.385497 | 3647730  |
| C6_01300W_A | 1.277376 | 0.54355  | 3644024  |
| ERG25       | 1.27702  | 0.421887 | 3644933  |
| C1_01490W_A | 1.27655  | 0.349193 | 3640226  |
| C1_02410C_A | 1.273627 | 0.519693 | 3636793  |
| CR_10380C_A | 1.272862 | 0.717901 | 3638953  |
| SIN3        | 1.269971 | 0.332221 | 3639282  |
| C3_02870C_A | 1.269466 | 0.581873 | 3638334  |
| HOS2        | 1.269193 | 0.52956  | 3640509  |
| CR_00420W_A | 1.268315 | 0.656738 | 3639728  |
| TRP1        | 1.267819 | 0.421318 | 3639321  |
| C3_07760C_A | 1.267458 | 0.653975 | 3638450  |
| C4_06740C_A | 1.267208 | 0.367618 | 3642923  |
| CR_02120C_A | 1.266516 | 0.645951 | 3640143  |

|             |          |          |          |
|-------------|----------|----------|----------|
| C2_01740C_A | 1.26078  | 0.547855 | 3635733  |
| C7_00780W_A | 1.260575 | 0.404599 | 3637945  |
| MPH1        | 1.260016 | 0.505157 | 3642817  |
| C7_02370W_A | 1.258384 | 0.384409 | 3636930  |
| PTH2        | 1.25837  | 0.525348 | 3637709  |
| C1_00470C_A | 1.254889 | 0.458226 | 3639315  |
| C5_02820C_A | 1.254357 | 0.473928 | 3637808  |
| C2_03830W_A | 1.254349 | 0.405131 | 3637399  |
| C2_08620W_A | 1.25149  | 0.50372  | 3643912  |
| CR_08930C_A | 1.25084  | 0.444793 | 3641913  |
| MKC1        | 1.250708 | 0.400586 | 3639710  |
| FGR28       | 1.250526 | 0.541439 | 3648315  |
| C4_05010W_A | 1.250407 | 0.431087 | 3641148  |
| C1_08760W_A | 1.250402 | 0.544471 | 3634787  |
| GSL1        | 1.248849 | 0.534239 | 3639844  |
| SEC5        | 1.248124 | 0.483275 | 3648178  |
| C1_14520W_A | 1.247259 | 0.384217 | 3643332  |
| INT1        | 1.245117 | 0.477351 | 3637761  |
| C6_02740W_A | 1.244537 | 0.544774 | 3639216  |
| CR_06690C_A | 1.244389 | 0.522087 | 3646624  |
| C1_03990W_A | 1.243917 | 0.572031 | 3646424  |
| C3_06040W_A | 1.243556 | 0.663941 | 3641745  |
| SKO1        | 1.242069 | 0.425839 | 3644688  |
| SPT20       | 1.241635 | 0.52905  | 3642492  |
| RAD2        | 1.241516 | 0.4973   | 3645374  |
| C6_02900C_A | 1.241266 | 0.568609 | 3639240  |
| C1_02470W_A | 1.239205 | 0.678371 | 3636851  |
| SBP1        | 1.238815 | 0.427637 | 3635280  |
| C4_03150W_A | 1.238669 | 0.431072 | 3637842  |
| C2_08060W_A | 1.237838 | 0.695973 | 30515151 |
| GRP2        | 1.234647 | 0.408576 | 3637744  |
| C2_00840W_A | 1.234481 | 0.483867 | 3638807  |
| AGP3        | 1.233351 | 0.569601 | 3641163  |
| C3_03060W_A | 1.233168 | 0.731213 | 3638395  |
| C6_00690W_A | 1.232792 | 0.63245  | 3647075  |
| C7_04110W_A | 1.231303 | 0.497397 | 3643133  |
| MGE1        | 1.231159 | 0.466366 | 3640133  |
| OPI1        | 1.231023 | 0.50332  | 3635777  |
| C6_01940W_A | 1.230837 | 0.739657 | 30515337 |
| AMO1        | 1.230622 | 0.720264 | 3642994  |
| PUP3        | 1.229673 | 0.497621 | 3646718  |
| YPT52       | 1.229319 | 0.47883  | 3643346  |
| RPO26       | 1.228517 | 0.451106 | 3646351  |
| C2_03950W_A | 1.228259 | 0.504441 | 3637420  |
| SET6        | 1.227864 | 0.547899 | 3644590  |
| RPL9B       | 1.227828 | 0.478957 | 3638348  |
| C7_00580C_A | 1.227233 | 0.646888 | 3637995  |

|             |          |          |          |
|-------------|----------|----------|----------|
| HOL1        | 1.226986 | 0.6469   | 3636838  |
| C2_01030W_A | 1.226773 | 0.453929 | 3638836  |
| C2_07240C_A | 1.226327 | 0.765074 | 3643486  |
| YIM1        | 1.225607 | 0.475432 | 3637372  |
| NMD5        | 1.225253 | 0.422184 | 3645745  |
| C3_03380W_A | 1.225034 | 0.576451 | 3638367  |
| HGT14       | 1.223529 | 0.586118 | 3648320  |
| C1_05610W_A | 1.222753 | 0.597168 | 3639843  |
| CR_10390W_A | 1.222068 | 0.692093 | 3638954  |
| C4_06690C_A | 1.221777 | 0.495615 | 30515285 |
| NUP84       | 1.221665 | 0.433268 | 3645351  |
| IQG1        | 1.221339 | 0.611929 | 3637052  |
| RIB4        | 1.220534 | 0.505326 | 30514995 |
| WH11        | 1.219289 | 0.485812 | 30515117 |
| C7_03030W_A | 1.218712 | 0.648069 | 3641380  |
| C5_01470C_A | 1.217706 | 0.614    | 3647050  |
| C2_07290W_A | 1.216576 | 0.463131 | 3643476  |
| ATC1        | 1.215991 | 0.559251 | 3639570  |
| YHB4        | 1.215773 | 0.460672 | 3638999  |
| VTI1        | 1.215318 | 0.495912 | 3638352  |
| YAE1        | 1.213217 | 0.684694 | 3637941  |
| C2_05300C_A | 1.212306 | 0.459974 | 3643423  |
| VPS41       | 1.211146 | 0.607984 | 3634800  |
| C5_04920C_A | 1.211092 | 0.466771 | 3636419  |
| PRE8        | 1.210043 | 0.458827 | 3641906  |
| ECM14       | 1.209619 | 0.559617 | 3638392  |
| C4_03560W_A | 1.209112 | 0.537199 | 3645373  |
| C4_05360C_A | 1.208815 | 0.72476  | 3646949  |
| C1_01860W_A | 1.208579 | 0.493807 | 3645430  |
| C1_05750C_A | 1.207823 | 0.484797 | 3639891  |
| C2_04780W_A | 1.207563 | 0.496025 | 3647781  |
| DIM1        | 1.207108 | 0.600327 | 3636135  |
| C3_02160C_A | 1.206517 | 0.441094 | 3636654  |
| C5_03010W_A | 1.205547 | 0.534467 | 3637819  |
| C1_02030C_A | 1.205131 | 0.72462  | 3645415  |
| C7_02630W_A | 1.20418  | 0.648362 | 3647646  |
| C5_02740W_A | 1.203544 | 0.543915 | 3637739  |
| C7_02690C_A | 1.202908 | 0.660042 | 3647649  |
| CR_08550W_A | 1.201982 | 0.425519 | 3642141  |
| TAF60       | 1.201577 | 0.538807 | 3642252  |
| YTM1        | 1.201204 | 0.50965  | 3634765  |
| C5_02660C_A | 1.201046 | 0.575587 | 3637771  |
| C4_05260W_A | 1.20069  | 0.543433 | 3648282  |
| GCN2        | 1.19871  | 0.549521 | 3645897  |
| C5_01000C_A | 1.198155 | 0.568774 | 3642651  |
| C5_03810C_A | 1.197951 | 0.762332 | 3647229  |
| C7_01570C_A | 1.197506 | 0.760562 | 3637040  |

|             |          |          |          |
|-------------|----------|----------|----------|
| C2_00110W_A | 1.197306 | 0.678213 | 3647921  |
| C4_03950C_A | 1.1948   | 0.748564 | 30515263 |
| C4_01560C_A | 1.194619 | 0.546869 | 3635714  |
| C1_13690C_A | 1.194107 | 0.51303  | 30515076 |
| STB5        | 1.192791 | 0.597116 | 3640208  |
| FUR1        | 1.191974 | 0.537685 | 3646348  |
| EAf7        | 1.191929 | 0.515487 | 3640973  |
| C6_00890W_A | 1.190941 | 0.530924 | 3644028  |
| TRM2        | 1.190921 | 0.600337 | 3640235  |
| C1_04910C_A | 1.190305 | 0.566671 | 3644793  |
| C1_12530C_A | 1.189267 | 0.663075 | 3647608  |
| C5_00030W_A | 1.188789 | 0.508493 | 3647879  |
| MSS4        | 1.187708 | 0.470235 | 3647957  |
| CR_02300C_A | 1.187324 | 0.504502 | 3644938  |
| C2_05760C_A | 1.185984 | 0.583582 | 3645578  |
| CR_03760W_A | 1.185035 | 0.620478 | 3643178  |
| ORC4        | 1.184613 | 0.579496 | 3637753  |
| HSP90       | 1.184459 | 0.53015  | 3636951  |
| C1_11370C_A | 1.184427 | 0.6298   | 3644547  |
| C6_02630C_A | 1.184262 | 0.659447 | 3639221  |
| C2_09830C_A | 1.183975 | 0.715136 | 30515161 |
| CR_02210W_A | 1.183306 | 0.634066 | 3644943  |
| CR_07870W_A | 1.183062 | 0.733274 | 3644146  |
| CR_09500C_A | 1.183027 | 0.692417 | 3641897  |
| DTD2        | 1.182541 | 0.592889 | 3638390  |
| C2_10330C_A | 1.18059  | 0.80724  | 3643943  |
| C1_03950C_A | 1.180326 | 0.807782 | 3646417  |
| BUD31       | 1.179599 | 0.741882 | 3634796  |
| AYR2        | 1.178813 | 0.620019 | 3639184  |
| RLP24       | 1.178491 | 0.553435 | 3645748  |
| C4_05040W_A | 1.178331 | 0.864991 | 30515275 |
| SIT1        | 1.177795 | 0.53234  | 3642307  |
| C7_01650W_A | 1.17747  | 0.476308 | 3636984  |
| RPL40B      | 1.17729  | 0.513601 | 30515232 |
| PUS7        | 1.176912 | 0.521322 | 3643960  |
| C1_01680C_A | 1.176831 | 0.652189 | 3640198  |
| URA1        | 1.176443 | 0.50848  | 3634819  |
| ROT2        | 1.176007 | 0.556798 | 3641566  |
| C3_01850W_A | 1.175686 | 0.608655 | 3636565  |
| SNG4        | 1.175426 | 0.655657 | 3646714  |
| C6_01000C_A | 1.175371 | 0.647801 | 3644048  |
| CR_00570W_A | 1.175158 | 0.553064 | 3639664  |
| PES1        | 1.173617 | 0.568867 | 3644105  |
| C2_00060C_A | 1.173181 | 0.535571 | 3647914  |
| C2_05530C_A | 1.172945 | 0.544991 | 3643422  |
| C3_05110W_A | 1.172085 | 0.712964 | 3635158  |
| AQY1        | 1.170757 | 0.663777 | 3642587  |

|             |          |          |          |
|-------------|----------|----------|----------|
| C1_02700C_A | 1.170575 | 0.663473 | 30514972 |
| C3_06550C_A | 1.17031  | 0.652209 | 3642275  |
| AKL1        | 1.169456 | 0.521134 | 3641237  |
| C2_04380C_A | 1.16909  | 0.587185 | 3645459  |
| TRS33       | 1.168332 | 0.68558  | 3636992  |
| PEX6        | 1.168325 | 0.676881 | 3643436  |
| C1_06030C_A | 1.167616 | 0.779004 | 3639867  |
| CDC14       | 1.167603 | 0.613794 | 3647132  |
| RAC1        | 1.167031 | 0.585723 | 3639508  |
| C1_03510C_A | 1.166931 | 0.680107 | 3636916  |
| C3_05090C_A | 1.165633 | 0.606597 | 3635245  |
| C1_08470W_A | 1.165547 | 0.709365 | 3646490  |
| ATO1        | 1.164968 | 0.800383 | 3647761  |
| C3_02080W_A | 1.164876 | 0.61884  | 3636575  |
| C3_01890C_A | 1.163162 | 0.534867 | 3636561  |
| C7_02340C_A | 1.163159 | 0.591612 | 3636933  |
| SEN1        | 1.162605 | 0.56454  | 3635255  |
| KIS2        | 1.161974 | 0.564696 | 3636211  |
| PUP1        | 1.161352 | 0.522255 | 3638936  |
| C1_14080W_A | 1.160965 | 0.57643  | 3643345  |
| MRPS9       | 1.160737 | 0.588217 | 3642064  |
| CR_08430W_A | 1.160721 | 0.565848 | 3642120  |
| CHS4        | 1.160199 | 0.511729 | 3641726  |
| VPS15       | 1.159396 | 0.617023 | 3644040  |
| COQ4        | 1.15923  | 0.607035 | 3636804  |
| CR_06230W_A | 1.159118 | 0.626138 | 3644867  |
| C5_05250C_A | 1.157983 | 0.613923 | 3636472  |
| C1_13840W_A | 1.15776  | 0.526239 | 3636129  |
| TPK2        | 1.157513 | 0.593631 | 3643482  |
| C5_02990W_A | 1.155987 | 0.782453 | 3637817  |
| C3_02760C_A | 1.155537 | 0.622214 | 3638413  |
| C5_00150C_A | 1.155444 | 0.524888 | 3647872  |
| YDC1        | 1.154992 | 0.745085 | 3642962  |
| C2_07860W_A | 1.154436 | 0.6498   | 3642320  |
| CR_09490W_A | 1.154077 | 0.609739 | 3641896  |
| HPD1        | 1.152871 | 0.79934  | 3639239  |
| CR_01570W_A | 1.152003 | 0.764937 | 3640077  |
| MOB2        | 1.15198  | 0.638766 | 3639381  |
| C2_03780C_A | 1.151951 | 0.585547 | 3637368  |
| RTA2        | 1.151805 | 0.575108 | 3646567  |
| C1_10200C_A | 1.15172  | 0.655626 | 3634877  |
| VAC8        | 1.151351 | 0.58236  | 3647410  |
| C2_06160W_A | 1.149883 | 0.798483 | 3644079  |
| NUP82       | 1.148983 | 0.611411 | 3640261  |
| CR_04580W_A | 1.147464 | 0.658663 | 3640948  |
| CR_03540W_A | 1.147454 | 0.754848 | 3643215  |
| C4_05210W_A | 1.146367 | 0.744903 | 3646154  |

|             |          |          |          |
|-------------|----------|----------|----------|
| C2_04130W_A | 1.146096 | 0.656379 | 3637334  |
| HCR1        | 1.146042 | 0.583945 | 3638952  |
| C6_03740W_A | 1.146011 | 0.860337 | 3640304  |
| INO4        | 1.145705 | 0.7509   | 30515105 |
| C1_07860W_A | 1.14542  | 0.861385 | 3640740  |
| ATO9        | 1.145391 | 0.860002 | 3640392  |
| C5_04940W_A | 1.144814 | 0.839065 | 3636421  |
| C3_04120C_A | 1.144322 | 0.730853 | 3635282  |
| NAM7        | 1.144285 | 0.567511 | 3641540  |
| CR_03350C_A | 1.14169  | 0.624036 | 3645142  |
| MNR2        | 1.139791 | 0.610275 | 3645017  |
| C2_10870W_A | 1.139221 | 0.681862 | 3641234  |
| SSK2        | 1.138228 | 0.616757 | 3641144  |
| ILS1        | 1.137705 | 0.607055 | 3645956  |
| C4_06450W_A | 1.13692  | 0.795948 | 3642792  |
| GPD1        | 1.136529 | 0.609105 | 3643924  |
| MRR1        | 1.134551 | 0.683028 | 3641741  |
| CR_07020W_A | 1.134169 | 0.648947 | 3645731  |
| C2_10120W_A | 1.133016 | 0.743695 | 3643936  |
| C4_03140C_A | 1.132801 | 0.730576 | 3637843  |
| FGR10       | 1.131065 | 0.815365 | 3641159  |
| C1_08910C_A | 1.129968 | 0.775372 | 3634926  |
| C4_05330C_A | 1.126176 | 0.730023 | 3646959  |
| C7_00850W_A | 1.125239 | 0.784099 | 3638056  |
| HOF1        | 1.124945 | 0.870661 | 3645014  |
| RLI1        | 1.124276 | 0.669905 | 3636888  |
| UGA2        | 1.124271 | 0.758128 | 3645436  |
| RPC11       | 1.124133 | 0.78668  | 3641239  |
| QCR9        | 1.124034 | 0.700936 | 30515251 |
| SPA2        | 1.122626 | 0.646611 | 3646824  |
| C3_02490C_A | 1.122293 | 0.631749 | 3638351  |
| ASG1        | 1.121623 | 0.668238 | 3647687  |
| C5_04610W_A | 1.120893 | 0.652358 | 3636393  |
| CR_05100W_A | 1.119729 | 0.753994 | 3646403  |
| EMC9        | 1.119506 | 0.656462 | 3647918  |
| C4_03780C_A | 1.119275 | 0.669919 | 3645353  |
| GGA2        | 1.119184 | 0.647103 | 3636928  |
| C5_00250C_A | 1.118989 | 0.814135 | 3641562  |
| FLC3        | 1.117399 | 0.714624 | 3642322  |
| CR_07120C_A | 1.116723 | 0.885106 | 3648225  |
| SMT3        | 1.115869 | 0.683124 | 3644550  |
| C3_04190W_A | 1.115722 | 0.915895 | 30515203 |
| SNU114      | 1.115597 | 0.688253 | 3647798  |
| MSW1        | 1.115547 | 0.753475 | 3637743  |
| NTF2        | 1.114132 | 0.702231 | 30515039 |
| PRE6        | 1.113172 | 0.672688 | 30515395 |
| FAA4        | 1.112995 | 0.666686 | 3638973  |

|             |          |          |          |
|-------------|----------|----------|----------|
| C4_06730C_A | 1.112151 | 0.655528 | 3642924  |
| C1_07570C_A | 1.111323 | 0.814057 | 3646675  |
| C2_01440C_A | 1.111131 | 0.833449 | 30515090 |
| C5_01880C_A | 1.110798 | 0.791699 | 3643751  |
| FCY21       | 1.110281 | 0.645944 | 3643822  |
| CR_03960C_A | 1.109217 | 0.777285 | 3640963  |
| XUT1        | 1.10908  | 0.79431  | 3642785  |
| C4_03600C_A | 1.108881 | 0.74409  | 3645366  |
| NIT2        | 1.108615 | 0.806001 | 3641874  |
| DUR35       | 1.10765  | 0.926655 | 3635150  |
| C1_06530C_A | 1.107185 | 0.647328 | 3639521  |
| C1_10920W_A | 1.106621 | 0.785457 | 3644433  |
| C3_07850W_A | 1.106005 | 0.726737 | 3647466  |
| TEL1        | 1.106004 | 0.777508 | 3639263  |
| GRE2        | 1.104544 | 0.801754 | 3648026  |
| RPN10       | 1.103646 | 0.712526 | 3644080  |
| C7_04200C_A | 1.102372 | 0.729031 | 3643122  |
| CR_10620C_A | 1.102285 | 0.698893 | 3639006  |
| CR_04140W_A | 1.101288 | 0.711576 | 3640974  |
| C7_00070C_A | 1.101122 | 0.706362 | 3638011  |
| GCN5        | 1.100343 | 0.740389 | 3646626  |
| TUP1        | 1.098508 | 0.726919 | 3639369  |
| CR_01790C_A | 1.098445 | 0.784636 | 3640161  |
| TIF3        | 1.097911 | 0.681127 | 3641646  |
| C3_02770C_A | 1.097505 | 0.756475 | 3638414  |
| C5_04330W_A | 1.097416 | 0.787601 | 30515314 |
| CSI2        | 1.09735  | 0.770845 | 3642016  |
| DEM1        | 1.097071 | 0.817124 | 3643200  |
| SPT3        | 1.096858 | 0.761319 | 3638977  |
| C2_03490C_A | 1.095637 | 0.766718 | 3637346  |
| MRP20       | 1.09551  | 0.736738 | 3640224  |
| PGA59       | 1.094773 | 0.726021 | 3637881  |
| C4_00660W_A | 1.094442 | 0.762994 | 3645755  |
| C1_09280W_A | 1.093982 | 0.779304 | 3634829  |
| FDH3        | 1.093614 | 0.723187 | 3638923  |
| C5_00320W_A | 1.093588 | 0.804123 | 30515291 |
| C1_08340C_A | 1.09313  | 0.838359 | 3640752  |
| CR_08110W_A | 1.091993 | 0.849124 | 3642067  |
| RPB4        | 1.091855 | 0.76837  | 3647800  |
| TLO4        | 1.091233 | 0.87492  | 30515080 |
| YEA4        | 1.09101  | 0.877379 | 3643787  |
| C2_01340W_A | 1.090526 | 0.73532  | 3638844  |
| BZZ1        | 1.090022 | 0.782207 | 3636572  |
| C1_00910W_A | 1.089744 | 0.890684 | 3639284  |
| C6_01120C_A | 1.089339 | 0.886809 | 3644054  |
| CR_10180W_A | 1.089003 | 0.888543 | 3638917  |
| C7_02860C_A | 1.087804 | 0.74866  | 3641397  |



|             |          |          |         |
|-------------|----------|----------|---------|
| NOT3        | 1.087315 | 0.76222  | 3638829 |
| C1_11090C_A | 1.087164 | 0.784952 | 3644415 |
| C6_00900C_A | 1.087152 | 0.867151 | 3644029 |
| C6_00490W_A | 1.086156 | 0.822504 | 3647150 |
| C6_02690C_A | 1.085435 | 0.754397 | 3639228 |
| C3_01690W_A | 1.083664 | 0.779939 | 3636604 |
| NOT4        | 1.083506 | 0.752346 | 3645115 |
| PEX14       | 1.08349  | 0.797148 | 3648208 |
| CHS1        | 1.083312 | 0.897814 | 3641364 |
| HHT1        | 1.083292 | 0.734503 | 3638444 |
| C4_06840W_A | 1.083098 | 0.847532 | 3642913 |
| C1_03920C_A | 1.080174 | 0.881835 | 3646413 |
| C2_04960C_A | 1.078866 | 0.861111 | 3643442 |
| C2_02290C_A | 1.078705 | 0.92036  | 3635807 |
| C5_04960W_A | 1.078645 | 0.7653   | 3636423 |
| CDC23       | 1.078084 | 0.837402 | 3642111 |
| GLC7        | 1.07794  | 0.738583 | 3647257 |
| LYS142      | 1.077854 | 0.836883 | 3634896 |
| ACF2        | 1.077211 | 0.85915  | 3641613 |
| EHT1        | 1.076426 | 0.830536 | 3636894 |
| CR_04390C_A | 1.076305 | 0.798231 | 3640980 |
| CR_04170W_A | 1.075543 | 0.778749 | 3640977 |
| TAF4        | 1.075179 | 0.786465 | 3645198 |
| C3_03590W_A | 1.074853 | 0.815818 | 3638302 |
| HMT1        | 1.074834 | 0.791622 | 3640182 |
| TPO5        | 1.074052 | 0.861696 | 3647791 |
| C2_03560C_A | 1.073429 | 0.816098 | 3637337 |
| ALK2        | 1.073313 | 0.857556 | 3639700 |
| CR_03430W_A | 1.072315 | 0.890099 | 3645114 |
| C4_01130C_A | 1.071765 | 0.865538 | 3635682 |
| CR_07200W_A | 1.071527 | 0.840563 | 3646044 |
| SAP10       | 1.071439 | 0.819007 | 3641126 |
| RPA135      | 1.070188 | 0.803468 | 3637996 |
| CR_03230W_A | 1.06967  | 0.808149 | 3645127 |
| C5_03830C_A | 1.069184 | 0.839547 | 3647227 |
| C3_03470W_A | 1.068189 | 0.8946   | 3638306 |
| C5_00380W_A | 1.06745  | 0.85438  | 3641553 |
| C2_07390C_A | 1.066985 | 0.82303  | 3645229 |
| C1_09000W_A | 1.066957 | 0.89509  | 3634915 |
| HMX1        | 1.066648 | 0.778345 | 3639294 |
| BNI1        | 1.066585 | 0.78494  | 3636118 |
| C6_04440C_A | 1.066386 | 0.822388 | 3645983 |
| C7_01590C_A | 1.064942 | 0.873687 | 3637037 |
| NGS1        | 1.064804 | 0.811593 | 3639703 |
| CDS1        | 1.064293 | 0.806146 | 3647729 |
| C4_06360C_A | 1.062303 | 0.950755 | 3642825 |
| ALK8        | 1.062192 | 0.950413 | 3648226 |

|             |          |          |          |
|-------------|----------|----------|----------|
| C1_09930W_A | 1.062192 | 0.950493 | 3634860  |
| CR_06310W_A | 1.062082 | 0.950979 | 3644860  |
| C4_04950W_A | 1.062014 | 0.951014 | 3641168  |
| C1_14200W_A | 1.061935 | 0.851011 | 3643301  |
| C1_00540C_A | 1.06145  | 0.829989 | 3639367  |
| C5_00560W_A | 1.061008 | 0.834313 | 3648267  |
| NOP5        | 1.060835 | 0.828703 | 3646084  |
| CHS3        | 1.060255 | 0.81013  | 3636199  |
| C2_02540W_A | 1.06009  | 0.831772 | 3635820  |
| FLC1        | 1.059229 | 0.817214 | 3639854  |
| C1_12350W_A | 1.058958 | 0.821691 | 3642063  |
| C1_00760W_A | 1.057478 | 0.875443 | 3639351  |
| C3_00420W_A | 1.05709  | 0.8354   | 3640553  |
| C1_05400C_A | 1.057049 | 0.91128  | 3642478  |
| SAC3        | 1.055713 | 0.832964 | 3635823  |
| YPT7        | 1.055381 | 0.900278 | 3636864  |
| TIP120      | 1.055024 | 0.847477 | 3638494  |
| RRP42       | 1.054166 | 0.878876 | 3647852  |
| CR_02390W_A | 1.053865 | 0.875198 | 3644930  |
| ECM7        | 1.052912 | 0.863353 | 3645029  |
| C4_01660W_A | 1.052442 | 0.838279 | 3635712  |
| C6_00210W_A | 1.051565 | 0.894532 | 3646060  |
| CR_02610C_A | 1.051458 | 0.853078 | 3642566  |
| ANT1        | 1.049913 | 0.908361 | 3639516  |
| C2_08830W_A | 1.049419 | 0.858302 | 3643894  |
| C1_07360W_A | 1.049309 | 0.852817 | 3644470  |
| C4_00820W_A | 1.048844 | 0.889277 | 3645741  |
| HST3        | 1.047962 | 0.867935 | 3642641  |
| C4_04930C_A | 1.047025 | 0.918764 | 3641170  |
| ERG1        | 1.046784 | 0.845355 | 3646509  |
| SET1        | 1.046209 | 0.881531 | 3639280  |
| YML6        | 1.044253 | 0.873516 | 3637954  |
| LAB5        | 1.043414 | 0.863518 | 3637893  |
| GLN1        | 1.043    | 0.883919 | 3646386  |
| PIN3        | 1.042881 | 0.868978 | 3635228  |
| C1_06800W_A | 1.04244  | 0.87978  | 3639496  |
| IMH3        | 1.041626 | 0.888113 | 3646556  |
| TSC2        | 1.04094  | 0.898185 | 3646953  |
| HST1        | 1.040389 | 0.910274 | 3634770  |
| C1_04990C_A | 1.039463 | 0.915903 | 3647530  |
| C1_00970W_A | 1.038754 | 0.955434 | 30514958 |
| C2_02150C_A | 1.037279 | 0.899995 | 3635749  |
| MSF1        | 1.03551  | 0.896931 | 3638806  |
| C3_01150C_A | 1.035258 | 0.918684 | 3648401  |
| SEC9        | 1.035061 | 0.891089 | 3644052  |
| CR_09310W_A | 1.034615 | 0.914196 | 3641923  |
| RPL38       | 1.034288 | 0.905688 | 30515082 |

|             |          |          |          |
|-------------|----------|----------|----------|
| RAD9        | 1.032688 | 0.925235 | 3637780  |
| C4_05620C_A | 1.032361 | 0.954211 | 3641783  |
| HXK1        | 1.031457 | 0.905827 | 3645964  |
| C1_06600W_A | 1.030527 | 0.9003   | 3639513  |
| C7_02170C_A | 1.029891 | 0.939506 | 3636993  |
| CDC43       | 1.029629 | 0.953897 | 3648206  |
| C3_03070W_A | 1.028774 | 0.925602 | 3638396  |
| C4_06800W_A | 1.028161 | 0.910882 | 3642917  |
| SKI2        | 1.027668 | 0.913465 | 3642143  |
| C6_00230W_A | 1.027635 | 0.953819 | 3646061  |
| C7_02850W_A | 1.027214 | 0.921162 | 3641399  |
| FCR3        | 1.026715 | 0.926339 | 3643760  |
| CR_01420W_A | 1.02567  | 0.923267 | 3640137  |
| C2_09680W_A | 1.024445 | 0.934509 | 3643791  |
| ECM17       | 1.022685 | 0.930213 | 3644077  |
| C7_03480W_A | 1.021863 | 0.941703 | 3646230  |
| C1_03400W_A | 1.02089  | 0.938428 | 3636904  |
| C4_04620C_A | 1.019433 | 0.971475 | 3641155  |
| C6_04110W_A | 1.019171 | 0.946462 | 3647834  |
| VPS22       | 1.018754 | 0.97123  | 3647250  |
| C5_04720C_A | 1.016538 | 0.956022 | 3636518  |
| C2_07520C_A | 1.015959 | 0.956124 | 3645207  |
| TAC1        | 1.015804 | 0.959235 | 3643755  |
| PHO112      | 1.015746 | 0.987989 | 3644929  |
| MAS2        | 1.014387 | 0.959904 | 3647249  |
| C2_09310C_A | 1.013985 | 0.973645 | 3644104  |
| C6_02310W_A | 1.01374  | 0.969137 | 3645875  |
| C2_02500W_A | 1.013435 | 0.966209 | 3635816  |
| C7_01030C_A | 1.013338 | 0.960598 | 3638019  |
| C5_00230C_A | 1.012148 | 0.987297 | 3641564  |
| C6_03240W_A | 1.012148 | 0.987321 | 3639181  |
| C5_02360C_A | 1.012109 | 0.987306 | 3637792  |
| C1_12800W_A | 1.012109 | 0.987321 | 3646828  |
| C5_04890C_A | 1.01181  | 0.97937  | 3636415  |
| C4_02660W_A | 1.011795 | 0.988016 | 3637831  |
| PET100      | 1.010862 | 0.97507  | 30515038 |
| CR_04160C_A | 1.010851 | 0.972193 | 3640976  |
| C3_00300W_A | 1.009099 | 0.973032 | 3640524  |
| C1_10280C_A | 1.008934 | 0.98023  | 3634902  |
| C1_11790W_A | 1.00884  | 0.985723 | 3645326  |
| PGA27       | 1.008608 | 0.986264 | 3638811  |
| C4_02150C_A | 1.008224 | 0.986885 | 3635670  |
| C7_00010C_A | 1.007374 | 0.97977  | 3638006  |
| C1_10470W_A | 1.006878 | 0.979098 | 3647184  |
| C5_01870W_A | 1.006361 | 0.980573 | 3643752  |
| ARO10       | 1.004442 | 0.990892 | 3647320  |
| C3_07660W_A | 1.003344 | 0.990658 | 3638462  |

|             |          |          |          |
|-------------|----------|----------|----------|
| C5_05260W_A | 1.003341 | 0.995139 | 3636473  |
| C3_07350W_A | 1.003011 | 0.990939 | 3638476  |
| C2_02490C_A | 1.002687 | 0.991051 | 3635815  |
| GSH2        | 1.00258  | 0.993042 | 3642083  |
| ECI1        | 1.002395 | 0.996009 | 3642128  |
| SYG1        | 1.000547 | 0.9985   | 3644777  |
| C2_03930C_A | -1.00035 | 0.998996 | 3637423  |
| NOC2        | -1.00047 | 0.998497 | 3647596  |
| C2_01750C_A | -1.00189 | 0.995329 | 3635734  |
| BFA1        | -1.00285 | 0.992653 | 3639301  |
| PTC1        | -1.00296 | 0.991582 | 3634827  |
| FRP3        | -1.00299 | 0.992117 | 3648102  |
| CR_09530C_A | -1.00329 | 0.989717 | 3647101  |
| SUL2        | -1.00409 | 0.990129 | 3637835  |
| RBT5        | -1.00519 | 0.986798 | 3645007  |
| C6_03260W_A | -1.00538 | 0.987228 | 3639183  |
| FGR17       | -1.00561 | 0.991373 | 3640296  |
| IFF5        | -1.00565 | 0.98389  | 3642782  |
| C1_00160C_A | -1.00586 | 0.985769 | 3639341  |
| C2_08900W_A | -1.00638 | 0.988342 | 30515156 |
| FOX3        | -1.0074  | 0.98125  | 3636629  |
| PPT1        | -1.00794 | 0.978059 | 3636602  |
| DAD4        | -1.00842 | 0.990058 | 30515433 |
| C7_03460W_A | -1.00845 | 0.990387 | 3646712  |
| CR_01170W_A | -1.00993 | 0.964201 | 3640429  |
| CR_06250W_A | -1.01017 | 0.9809   | 3644852  |
| C3_05140C_A | -1.01018 | 0.972688 | 3635161  |
| UTP20       | -1.01058 | 0.968567 | 3647956  |
| ERO1        | -1.01196 | 0.968677 | 3634810  |
| C1_10330C_A | -1.0131  | 0.968467 | 3634908  |
| C7_00130W_A | -1.01357 | 0.967445 | 3637975  |
| SUI2        | -1.0139  | 0.955573 | 3639569  |
| MRR2        | -1.01419 | 0.962722 | 3647468  |
| C1_07210C_A | -1.01433 | 0.958342 | 3644473  |
| C2_10820C_A | -1.01469 | 0.956326 | 3641230  |
| CR_08590W_A | -1.01486 | 0.955977 | 3642106  |
| CR_06960W_A | -1.01515 | 0.965615 | 3645737  |
| BCK1        | -1.01556 | 0.959582 | 3641384  |
| UFE1        | -1.0161  | 0.953099 | 3643174  |
| C2_06030W_A | -1.01612 | 0.956941 | 3644070  |
| C2_01490C_A | -1.01615 | 0.95501  | 3635800  |
| SNF1        | -1.01663 | 0.94637  | 3642643  |
| C2_05540C_A | -1.01664 | 0.962714 | 3645559  |
| C4_06880C_A | -1.01838 | 0.959145 | 30515287 |
| C1_03410W_A | -1.01897 | 0.975821 | 3636905  |
| MODF        | -1.0198  | 0.95846  | 3636182  |
| C4_04760C_A | -1.01988 | 0.955079 | 3641118  |

|             |          |          |          |
|-------------|----------|----------|----------|
| C2_01070W_A | -1.0204  | 0.936002 | 3638834  |
| POM152      | -1.02226 | 0.938094 | 3638812  |
| SDH4        | -1.02344 | 0.948718 | 3636497  |
| PHM7        | -1.02386 | 0.923135 | 3642329  |
| C3_01170W_A | -1.02606 | 0.926562 | 3647958  |
| CDR3        | -1.02629 | 0.951271 | 3645365  |
| C1_01180C_A | -1.02703 | 0.962343 | 3640206  |
| C5_05090W_A | -1.02729 | 0.939325 | 3636493  |
| CR_06680C_A | -1.02778 | 0.910319 | 3646623  |
| CR_00670C_A | -1.02877 | 0.937972 | 3639655  |
| IFU5        | -1.03008 | 0.906933 | 3640116  |
| C4_00880W_A | -1.03016 | 0.91682  | 3635681  |
| CR_05980W_A | -1.03198 | 0.899077 | 3642501  |
| C2_10760C_A | -1.03281 | 0.896556 | 3641238  |
| C1_06340W_A | -1.03294 | 0.960339 | 3639499  |
| TOP1        | -1.03451 | 0.894668 | 3644034  |
| C4_03410W_A | -1.03535 | 0.891511 | 3646807  |
| C7_01360C_A | -1.03572 | 0.9433   | 3645900  |
| FAA2        | -1.03617 | 0.898875 | 3641731  |
| C3_01260C_A | -1.03781 | 0.920615 | 3636625  |
| C5_00820W_A | -1.03833 | 0.886661 | 3644128  |
| CR_01780W_A | -1.03857 | 0.919836 | 3640157  |
| GSL2        | -1.0389  | 0.889467 | 3640410  |
| C4_02880C_A | -1.04022 | 0.910292 | 3637907  |
| C3_06150W_A | -1.04025 | 0.895475 | 3641765  |
| GAP6        | -1.04312 | 0.882413 | 3646968  |
| CR_10610C_A | -1.04371 | 0.93801  | 3639005  |
| C1_00510W_A | -1.04374 | 0.89707  | 3639311  |
| C2_01450C_A | -1.04418 | 0.966822 | 3635843  |
| C5_01260W_A | -1.04418 | 0.966842 | 3642615  |
| PRE1        | -1.04441 | 0.873367 | 3636500  |
| C7_02960C_A | -1.04577 | 0.910086 | 3641387  |
| PRE5        | -1.04589 | 0.855508 | 3643111  |
| C4_00850C_A | -1.04609 | 0.949566 | 3635718  |
| C3_01520C_A | -1.04622 | 0.863191 | 3636570  |
| C2_07920W_A | -1.04701 | 0.897522 | 3642294  |
| RRD1        | -1.04822 | 0.926111 | 3638445  |
| C6_04080W_A | -1.04829 | 0.836706 | 3647837  |
| CR_05460W_A | -1.04933 | 0.887443 | 3648237  |
| C3_07600W_A | -1.04985 | 0.891302 | 3638495  |
| AGE1        | -1.04987 | 0.877907 | 3636913  |
| C1_10170W_A | -1.05088 | 0.978168 | 3634783  |
| C2_06980W_A | -1.05088 | 0.978168 | 3643530  |
| C1_12940C_A | -1.05098 | 0.978122 | 30515067 |
| C1_11390W_A | -1.05098 | 0.978122 | 3644544  |
| C2_02790C_A | -1.05098 | 0.978122 | 3643029  |
| SCW4        | -1.05098 | 0.978122 | 3636797  |

|             |          |          |          |
|-------------|----------|----------|----------|
| C2_06140C_A | -1.05098 | 0.978122 | 3644082  |
| C2_06350C_A | -1.05098 | 0.978122 | 3646919  |
| OPT5        | -1.05098 | 0.978122 | 3640768  |
| DAL52       | -1.05098 | 0.978122 | 3643736  |
| C4_03490C_A | -1.05098 | 0.978122 | 3646799  |
| RBT7        | -1.05098 | 0.978122 | 3637925  |
| CR_09350C_A | -1.05098 | 0.978122 | 3641901  |
| CR_08740W_A | -1.05098 | 0.978122 | 3642123  |
| JEN1        | -1.05098 | 0.978122 | 3642278  |
| C7_01380W_A | -1.05098 | 0.978122 | 3645891  |
| CR_02340W_A | -1.05098 | 0.978122 | 3644936  |
| RNY11       | -1.05098 | 0.978122 | 3636408  |
| GTT12       | -1.05098 | 0.978122 | 3638304  |
| CR_00530W_A | -1.05098 | 0.978122 | 3639668  |
| CR_03300C_A | -1.05109 | 0.978076 | 3645098  |
| C4_04400C_A | -1.05109 | 0.978076 | 30515268 |
| GTT13       | -1.05109 | 0.978076 | 3638301  |
| C1_05890W_A | -1.05109 | 0.978076 | 3639876  |
| C3_07690C_A | -1.05434 | 0.846976 | 3638458  |
| PEP8        | -1.05454 | 0.849565 | 3645624  |
| UGA33       | -1.05469 | 0.88863  | 3641886  |
| ORC1        | -1.05511 | 0.831315 | 3636922  |
| C1_07960W_A | -1.05544 | 0.88172  | 3640725  |
| EAP1        | -1.05562 | 0.840286 | 3643814  |
| C4_06650W_A | -1.05576 | 0.821718 | 3642810  |
| C6_00550W_A | -1.05631 | 0.83189  | 3647144  |
| SAP8        | -1.05687 | 0.956289 | 3638371  |
| NIP100      | -1.05689 | 0.876603 | 3640970  |
| C1_05480C_A | -1.05769 | 0.942715 | 3642486  |
| COX13       | -1.05798 | 0.82522  | 3635784  |
| C1_11530C_A | -1.05817 | 0.933402 | 3645334  |
| C2_02910W_A | -1.05823 | 0.941993 | 30515097 |
| TEP1        | -1.05837 | 0.919028 | 3647653  |
| RRP6        | -1.05849 | 0.819497 | 3647535  |
| PCL1        | -1.05856 | 0.925728 | 3646356  |
| C5_00550C_A | -1.05867 | 0.911328 | 3641535  |
| DFG10       | -1.05869 | 0.917227 | 3645786  |
| C2_06650C_A | -1.05885 | 0.890485 | 3648419  |
| CR_02440W_A | -1.05889 | 0.92733  | 3644923  |
| BUR2        | -1.05899 | 0.864129 | 3637772  |
| CFL5        | -1.05909 | 0.918029 | 3642612  |
| C7_01950W_A | -1.05919 | 0.902196 | 3636970  |
| C2_01920C_A | -1.05921 | 0.856395 | 3635792  |
| C1_01090C_A | -1.05936 | 0.869667 | 3640174  |
| MRPL37      | -1.05937 | 0.87345  | 3644782  |
| C5_03850W_A | -1.05942 | 0.853036 | 3647225  |
| C5_04320C_A | -1.06001 | 0.834766 | 3636480  |

|             |          |          |          |
|-------------|----------|----------|----------|
| C2_04480W_A | -1.06062 | 0.910653 | 3645464  |
| C5_04910W_A | -1.0615  | 0.872811 | 3636417  |
| C1_06590C_A | -1.06157 | 0.8356   | 3639514  |
| CR_08300C_A | -1.06205 | 0.809917 | 3642076  |
| C2_00620C_A | -1.06209 | 0.885641 | 3638849  |
| C4_01820C_A | -1.06276 | 0.808656 | 3635594  |
| VPS34       | -1.06471 | 0.83765  | 3639540  |
| MVD         | -1.06514 | 0.803978 | 3639306  |
| CR_05560W_A | -1.06569 | 0.823335 | 3647592  |
| UGA1        | -1.06581 | 0.828448 | 3637329  |
| C4_06210C_A | -1.06609 | 0.800598 | 3642815  |
| UTP15       | -1.06641 | 0.804361 | 3643906  |
| GIR2        | -1.06653 | 0.812463 | 3636962  |
| ASR3        | -1.06676 | 0.789275 | 3637402  |
| C1_14450C_A | -1.06761 | 0.794351 | 3643299  |
| C2_01510C_A | -1.06809 | 0.892167 | 3635801  |
| C3_01670W_A | -1.06882 | 0.805681 | 3636606  |
| C3_03260W_A | -1.07092 | 0.786967 | 3638320  |
| YMX6        | -1.07094 | 0.862007 | 3640255  |
| SGE1        | -1.07139 | 0.812459 | 3642614  |
| C3_04750W_A | -1.07263 | 0.849593 | 3635252  |
| C5_02480W_A | -1.07354 | 0.795016 | 3637762  |
| C3_05680W_A | -1.07445 | 0.818108 | 3641724  |
| CR_03700C_A | -1.07462 | 0.789066 | 3643223  |
| RPF2        | -1.07468 | 0.804606 | 3643467  |
| GCD6        | -1.07511 | 0.74503  | 3646510  |
| BUD16       | -1.07582 | 0.867875 | 3647519  |
| FGR6-4      | -1.07613 | 0.824482 | 30515164 |
| C1_13790C_A | -1.07665 | 0.867051 | 3636141  |
| INO2        | -1.07693 | 0.868624 | 3639674  |
| CYM1        | -1.07703 | 0.766583 | 3642244  |
| HPA2        | -1.07799 | 0.823963 | 3647907  |
| SKN7        | -1.07891 | 0.796414 | 3641563  |
| CR_02590C_A | -1.07966 | 0.804635 | 3642595  |
| CHO2        | -1.07967 | 0.780029 | 3647690  |
| YTA6        | -1.08024 | 0.747711 | 3638990  |
| C6_04260C_A | -1.08047 | 0.871694 | 3646277  |
| C7_04260W_A | -1.08061 | 0.774391 | 3643160  |
| ARL1        | -1.08085 | 0.794614 | 3635637  |
| FET33       | -1.08094 | 0.808717 | 3641544  |
| C4_05650W_A | -1.08188 | 0.787361 | 3641814  |
| CR_06090W_A | -1.08306 | 0.75784  | 6335359  |
| C3_06140W_A | -1.0843  | 0.836751 | 3641764  |
| GSC1        | -1.08447 | 0.780601 | 3636794  |
| ZFU2        | -1.08482 | 0.80912  | 3638534  |
| C3_02410C_A | -1.08698 | 0.784421 | 3638341  |
| C1_05230W_A | -1.08723 | 0.85969  | 3642463  |

|             |          |          |         |
|-------------|----------|----------|---------|
| RPT1        | -1.08782 | 0.738044 | 3642461 |
| RBR2        | -1.08987 | 0.874654 | 3640983 |
| PLB4.5      | -1.09014 | 0.874465 | 3635724 |
| C1_04840C_A | -1.09086 | 0.830974 | 3644785 |
| C1_09540W_A | -1.09104 | 0.743249 | 3634885 |
| CR_07510W_A | -1.09159 | 0.831171 | 3647998 |
| CCP1        | -1.09195 | 0.822049 | 3638350 |
| NRG1        | -1.09241 | 0.765347 | 3643166 |
| RFX2        | -1.09331 | 0.891349 | 3635658 |
| C3_03680W_A | -1.09412 | 0.806064 | 3645648 |
| UTP21       | -1.09418 | 0.729608 | 3635757 |
| C1_06770W_A | -1.09427 | 0.747501 | 3639504 |
| SEC7        | -1.09535 | 0.720015 | 3635220 |
| CDL1        | -1.09659 | 0.742157 | 3641132 |
| CRM1        | -1.09678 | 0.714866 | 3639721 |
| HCH1        | -1.09713 | 0.782593 | 3641626 |
| PCL5        | -1.09756 | 0.731618 | 3636466 |
| C1_02750C_A | -1.09776 | 0.728822 | 3636828 |
| C2_08740W_A | -1.09794 | 0.798477 | 3643882 |
| C5_01040W_A | -1.09815 | 0.909474 | 3642649 |
| FAA2-1      | -1.09995 | 0.84444  | 3644100 |
| C5_01300C_A | -1.10079 | 0.868167 | 3642646 |
| C3_05940C_A | -1.10294 | 0.836526 | 3641744 |
| C5_01170W_A | -1.10302 | 0.840397 | 3642662 |
| MCT1        | -1.10304 | 0.815754 | 3646683 |
| C1_02090C_A | -1.10304 | 0.785168 | 3644577 |
| ZCF11       | -1.10321 | 0.771276 | 3645109 |
| PUT3        | -1.10361 | 0.734755 | 3639535 |
| SNM1        | -1.1038  | 0.80524  | 3642609 |
| C3_03540W_A | -1.10408 | 0.706768 | 3638313 |
| HAL21       | -1.10604 | 0.707998 | 3644045 |
| C3_07170C_A | -1.10656 | 0.67929  | 3638536 |
| C2_00920W_A | -1.10744 | 0.802338 | 3638893 |
| C2_04500W_A | -1.10774 | 0.723424 | 3645462 |
| C7_04150W_A | -1.10786 | 0.697339 | 3643128 |
| GLN4        | -1.10876 | 0.62962  | 3637998 |
| C3_03430C_A | -1.10881 | 0.828626 | 3638355 |
| FCY24       | -1.11124 | 0.807794 | 3641902 |
| C5_05210W_A | -1.11127 | 0.703162 | 3636468 |
| C5_02370C_A | -1.11229 | 0.71851  | 3637793 |
| CGT1        | -1.11302 | 0.70217  | 3641808 |
| C5_01610W_A | -1.11316 | 0.767855 | 3647251 |
| C2_05670C_A | -1.11351 | 0.739653 | 3645570 |
| C1_09440W_A | -1.11489 | 0.745775 | 3634857 |
| CFL2        | -1.11578 | 0.879783 | 3641811 |
| CR_03110W_A | -1.11659 | 0.73683  | 3645124 |
| RPR2        | -1.11692 | 0.835359 | 3641017 |



|             |          |          |          |
|-------------|----------|----------|----------|
| IRO1        | -1.11751 | 0.665588 | 3636648  |
| C1_13650C_A | -1.11755 | 0.745073 | 3636191  |
| C6_01210W_A | -1.11887 | 0.726825 | 30515330 |
| C4_00840W_A | -1.11905 | 0.674111 | 3635722  |
| C2_09690C_A | -1.11988 | 0.695017 | 3643789  |
| C1_01390C_A | -1.11989 | 0.685245 | 3640236  |
| C7_00500W_A | -1.12041 | 0.883652 | 3637987  |
| MNN23       | -1.12109 | 0.652492 | 3634813  |
| CR_06530W_A | -1.12192 | 0.752615 | 3645262  |
| CR_07160C_A | -1.122   | 0.706728 | 3648347  |
| MDS3        | -1.12253 | 0.646928 | 3638464  |
| FGR32       | -1.12284 | 0.593346 | 3644136  |
| C4_06410W_A | -1.12309 | 0.739838 | 3642796  |
| C6_02460C_A | -1.12345 | 0.702124 | 3639168  |
| C2_01760C_A | -1.12556 | 0.810259 | 3635736  |
| KRE1        | -1.12629 | 0.701798 | 3643180  |
| GCD1        | -1.12844 | 0.627084 | 3640965  |
| CSO99       | -1.12855 | 0.832777 | 3642786  |
| CR_06450W_A | -1.12864 | 0.717524 | 3645279  |
| PET127      | -1.12936 | 0.653402 | 3644417  |
| SDS22       | -1.13084 | 0.672639 | 3637362  |
| BMT6        | -1.13103 | 0.647961 | 3639258  |
| WSC4        | -1.13114 | 0.674494 | 3643282  |
| C3_01680C_A | -1.13237 | 0.71537  | 3636605  |
| BCR1        | -1.13339 | 0.63864  | 3645280  |
| NEP1        | -1.13425 | 0.64059  | 3644545  |
| MYO5        | -1.13457 | 0.629784 | 3647404  |
| C2_00790C_A | -1.13503 | 0.69687  | 3638907  |
| CR_03930C_A | -1.13537 | 0.668189 | 3640957  |
| C4_01790W_A | -1.13552 | 0.703983 | 3635597  |
| MNN13       | -1.13555 | 0.794025 | 3637720  |
| CR_03940W_A | -1.13629 | 0.659068 | 3648378  |
| KRR1        | -1.13686 | 0.692187 | 3644542  |
| C4_01720C_A | -1.13698 | 0.605771 | 3635589  |
| C5_03700C_A | -1.13775 | 0.699085 | 3646990  |
| RAX2        | -1.13776 | 0.603824 | 3647610  |
| C1_14560C_A | -1.13803 | 0.654961 | 3648376  |
| CR_06100C_A | -1.13828 | 0.870136 | 3644842  |
| C5_02800C_A | -1.13861 | 0.869113 | 3637807  |
| C6_04190C_A | -1.13864 | 0.867062 | 3646282  |
| C6_04230W_A | -1.13864 | 0.867304 | 3646274  |
| CR_01770C_A | -1.13865 | 0.600465 | 3640122  |
| C7_03400C_A | -1.14023 | 0.586723 | 3646717  |
| CR_00090C_A | -1.14031 | 0.656782 | 3639734  |
| C4_01290W_A | -1.14108 | 0.61532  | 3635699  |
| KIS1        | -1.14343 | 0.590371 | 3644063  |
| C4_05610C_A | -1.14388 | 0.62927  | 3641782  |

|             |          |          |          |
|-------------|----------|----------|----------|
| C5_05070W_A | -1.14414 | 0.738914 | 3636491  |
| C1_12880C_A | -1.14535 | 0.802696 | 3636151  |
| PRE3        | -1.14634 | 0.599645 | 3643660  |
| CR_06740W_A | -1.14646 | 0.700163 | 3646616  |
| CR_09750C_A | -1.1474  | 0.715005 | 3639009  |
| ARG4        | -1.14886 | 0.629283 | 3646237  |
| C2_04700C_A | -1.14928 | 0.691726 | 3647794  |
| C1_12820C_A | -1.14928 | 0.670052 | 3646826  |
| C2_05350C_A | -1.14947 | 0.790509 | 3643428  |
| C6_00250W_A | -1.15034 | 0.621173 | 3646063  |
| FGR43       | -1.15072 | 0.765564 | 3634828  |
| C5_03480C_A | -1.15208 | 0.632182 | 3646965  |
| ARG83       | -1.15224 | 0.716308 | 3637862  |
| C5_00260W_A | -1.15241 | 0.537977 | 3641561  |
| CR_10640W_A | -1.15307 | 0.724799 | 3639014  |
| C6_01920C_A | -1.1532  | 0.597682 | 3644534  |
| GLX3        | -1.15324 | 0.585949 | 3638325  |
| SKI3        | -1.15338 | 0.621552 | 3634847  |
| C3_00840C_A | -1.15465 | 0.695412 | 3647758  |
| DUR4        | -1.15481 | 0.716361 | 3645012  |
| RAD57       | -1.1552  | 0.676192 | 3642333  |
| PAM17       | -1.15552 | 0.605812 | 3638369  |
| SPT10       | -1.1571  | 0.649105 | 3645729  |
| ZCF8        | -1.15718 | 0.651146 | 3636651  |
| MTR10       | -1.15957 | 0.583619 | 3647235  |
| HAL22       | -1.15965 | 0.692624 | 3644051  |
| C5_01930W_A | -1.15983 | 0.611597 | 3643741  |
| UBA4        | -1.1607  | 0.593917 | 3644432  |
| C4_02260C_A | -1.16115 | 0.580989 | 3635690  |
| C4_03830W_A | -1.16131 | 0.571309 | 3647851  |
| ASR1        | -1.16174 | 0.69728  | 3644402  |
| C3_03200C_A | -1.16437 | 0.756118 | 3638428  |
| CR_03740C_A | -1.16448 | 0.59788  | 3643176  |
| CR_09700W_A | -1.16502 | 0.696104 | 3647088  |
| CR_05030W_A | -1.16515 | 0.535668 | 3646388  |
| C2_06200C_A | -1.16672 | 0.596228 | 3646908  |
| PWP1        | -1.16703 | 0.53709  | 3635623  |
| CR_00340C_A | -1.16727 | 0.786352 | 30515365 |
| C2_04730W_A | -1.16778 | 0.590597 | 3647787  |
| C6_03530C_A | -1.16786 | 0.785717 | 3640260  |
| MBF1        | -1.1679  | 0.585663 | 3640171  |
| CR_02600W_A | -1.16798 | 0.787318 | 3642596  |
| C1_01220C_A | -1.16919 | 0.688708 | 3640210  |
| UTP13       | -1.17021 | 0.526328 | 3637718  |
| C1_02900C_A | -1.17167 | 0.640994 | 3636869  |
| GDI1        | -1.17184 | 0.533827 | 3643298  |
| C3_00530C_A | -1.17193 | 0.630934 | 3640588  |

|             |          |          |          |
|-------------|----------|----------|----------|
| C6_03300C_A | -1.1723  | 0.595638 | 3639196  |
| AVT7        | -1.17356 | 0.58115  | 3637433  |
| C3_02990C_A | -1.17442 | 0.6959   | 3638388  |
| C6_01890C_A | -1.17488 | 0.525528 | 3641598  |
| C5_04260W_A | -1.17501 | 0.813436 | 3636451  |
| CR_08280W_A | -1.17516 | 0.69316  | 3642102  |
| C2_02180W_A | -1.17629 | 0.565068 | 3635752  |
| C2_04100W_A | -1.17649 | 0.657871 | 3637379  |
| C2_04180C_A | -1.17659 | 0.726845 | 3637330  |
| CR_02890C_A | -1.17672 | 0.58008  | 3642585  |
| MEF2        | -1.17739 | 0.539061 | 3639564  |
| C3_06760W_A | -1.17833 | 0.594424 | 3638502  |
| C5_03640W_A | -1.17878 | 0.573041 | 3646984  |
| C1_14460W_A | -1.1792  | 0.488064 | 3643326  |
| MED4        | -1.17928 | 0.621414 | 3645209  |
| C1_14430C_A | -1.1795  | 0.619444 | 3643297  |
| CKB2        | -1.17964 | 0.584668 | 3637741  |
| VPS36       | -1.18085 | 0.616067 | 3637354  |
| C5_03110C_A | -1.18246 | 0.747465 | 30515306 |
| C3_03150W_A | -1.18253 | 0.55971  | 3638423  |
| CR_06030C_A | -1.1844  | 0.647186 | 3644874  |
| C6_02350C_A | -1.18522 | 0.574199 | 3645881  |
| C2_06300W_A | -1.18557 | 0.713903 | 3646924  |
| C2_07680W_A | -1.18595 | 0.512826 | 3642339  |
| SPS20       | -1.18617 | 0.652599 | 3645739  |
| C5_01050C_A | -1.18696 | 0.584161 | 3642648  |
| C1_05980W_A | -1.18801 | 0.581878 | 3639872  |
| NMA111      | -1.18806 | 0.509644 | 3640179  |
| CR_07760W_A | -1.18869 | 0.740456 | 30515431 |
| RPT2        | -1.18909 | 0.505356 | 3640525  |
| ECM42       | -1.18935 | 0.613228 | 3636995  |
| C3_05460W_A | -1.1911  | 0.530375 | 3643670  |
| GYP8        | -1.19218 | 0.576051 | 3637750  |
| C3_07700W_A | -1.19269 | 0.510065 | 3638457  |
| C6_02800W_A | -1.19313 | 0.598378 | 3639246  |
| HEX1        | -1.1932  | 0.508895 | 3646981  |
| C1_02380C_A | -1.19362 | 0.718465 | 3636790  |
| NPL6        | -1.19428 | 0.495313 | 3638883  |
| YUH2        | -1.19469 | 0.520551 | 3636412  |
| C1_07390W_A | -1.19511 | 0.461846 | 3644466  |
| C5_04470C_A | -1.19583 | 0.448324 | 3636414  |
| C2_05910W_A | -1.19587 | 0.575539 | 3647476  |
| HAP5        | -1.19604 | 0.521239 | 3642654  |
| TIM17       | -1.19646 | 0.547377 | 3647790  |
| YVH1        | -1.19658 | 0.61784  | 3643218  |
| HGT16       | -1.19756 | 0.797958 | 3646026  |
| DBP2        | -1.19837 | 0.567719 | 3647692  |

|             |          |          |          |
|-------------|----------|----------|----------|
| NHP2        | -1.19842 | 0.551455 | 3641003  |
| C2_07040W_A | -1.19964 | 0.522043 | 3643499  |
| CSE4        | -1.19968 | 0.739776 | 3647750  |
| TIM22       | -1.19973 | 0.508304 | 3648168  |
| C2_03420C_A | -1.20009 | 0.472716 | 3637411  |
| C1_09310C_A | -1.20056 | 0.61192  | 3634833  |
| C5_00170W_A | -1.2017  | 0.523263 | 3647870  |
| CR_04830C_A | -1.20331 | 0.694071 | 3647297  |
| C5_02730C_A | -1.20476 | 0.491463 | 3637738  |
| CRD2        | -1.20481 | 0.858836 | 30515234 |
| C2_04390W_A | -1.20493 | 0.85536  | 3645458  |
| C2_01960C_A | -1.20498 | 0.853684 | 3635796  |
| C1_03660W_A | -1.205   | 0.80346  | 30514982 |
| PGA58       | -1.20506 | 0.853397 | 3637826  |
| C7_02090C_A | -1.20521 | 0.636179 | 3637024  |
| HGT1        | -1.20565 | 0.531221 | 3645420  |
| DSE1        | -1.20669 | 0.613935 | 3643899  |
| RMT2        | -1.20826 | 0.47288  | 3641569  |
| C5_02830W_A | -1.20851 | 0.504528 | 3637809  |
| MED8        | -1.20987 | 0.683069 | 3645446  |
| CR_09040W_A | -1.21006 | 0.625487 | 3641894  |
| C3_00950C_A | -1.21072 | 0.588902 | 3639852  |
| PTC2        | -1.211   | 0.449798 | 3640105  |
| C4_04120C_A | -1.21194 | 0.51929  | 3641222  |
| C6_03380W_A | -1.21214 | 0.468122 | 3639231  |
| AFL1        | -1.21233 | 0.422728 | 3641594  |
| CR_04240C_A | -1.21417 | 0.450521 | 3640989  |
| CR_07700W_A | -1.21491 | 0.685945 | 3648195  |
| C3_03230C_A | -1.21565 | 0.493247 | 3638316  |
| C7_00870W_A | -1.21596 | 0.684419 | 3638054  |
| C1_04700C_A | -1.21646 | 0.530446 | 3644766  |
| C4_03750C_A | -1.21717 | 0.612018 | 3645356  |
| C5_01200W_A | -1.21834 | 0.704351 | 3642657  |
| C7_03730C_A | -1.2191  | 0.495771 | 3647867  |
| C2_02420C_A | -1.21932 | 0.478572 | 3635756  |
| GPH1        | -1.21995 | 0.442261 | 3637956  |
| MOB1        | -1.2234  | 0.526414 | 3639208  |
| C3_06740W_A | -1.22441 | 0.493722 | 3638503  |
| C4_04990C_A | -1.2247  | 0.687712 | 3641166  |
| CR_05710C_A | -1.22568 | 0.680909 | 3646700  |
| PHR2        | -1.22569 | 0.441636 | 3639334  |
| C7_03680W_A | -1.22606 | 0.592584 | 3646228  |
| C2_08170W_A | -1.22696 | 0.798891 | 3642318  |
| SAP98       | -1.22836 | 0.608356 | 3637435  |
| C1_01470W_A | -1.2296  | 0.395913 | 3640241  |
| C1_03330C_A | -1.22979 | 0.513405 | 3636859  |
| YCK2        | -1.23018 | 0.397956 | 3643655  |

|             |          |          |          |
|-------------|----------|----------|----------|
| C4_03710C_A | -1.23069 | 0.600848 | 3645360  |
| CHA1        | -1.23097 | 0.645155 | 3638791  |
| AAH1        | -1.23107 | 0.531958 | 3643529  |
| C1_01930W_A | -1.23177 | 0.548557 | 30514966 |
| VID21       | -1.23281 | 0.404748 | 3642946  |
| C6_04450W_A | -1.23297 | 0.478682 | 3645982  |
| C4_05230C_A | -1.23448 | 0.494865 | 3646156  |
| C1_10340W_A | -1.23476 | 0.57879  | 3634909  |
| SPB1        | -1.23489 | 0.385329 | 3648179  |
| C6_01520W_A | -1.23524 | 0.743028 | 3641617  |
| PRP39       | -1.23545 | 0.569577 | 3635832  |
| HIR1        | -1.23553 | 0.379681 | 3638796  |
| CR_08920W_A | -1.23566 | 0.706544 | 3641911  |
| C2_06230W_A | -1.23667 | 0.391655 | 3646911  |
| CCR4        | -1.23675 | 0.364696 | 3640749  |
| SEC65       | -1.23934 | 0.456475 | 3640123  |
| C2_01240C_A | -1.23967 | 0.521442 | 3638794  |
| DUR7        | -1.24003 | 0.527711 | 3643335  |
| MEC3        | -1.24033 | 0.636459 | 3646910  |
| C6_03420W_A | -1.24097 | 0.694467 | 3639235  |
| CR_06040W_A | -1.24127 | 0.393416 | 3644836  |
| C2_06120C_A | -1.2413  | 0.624283 | 3644084  |
| RPA190      | -1.24172 | 0.430855 | 3647677  |
| PRP45       | -1.24225 | 0.590066 | 3639166  |
| C3_01660W_A | -1.2425  | 0.506446 | 3636607  |
| C3_01230C_A | -1.24354 | 0.744128 | 3636609  |
| NUP60       | -1.24468 | 0.359604 | 3642826  |
| CCW14       | -1.24492 | 0.574915 | 3642650  |
| DOA4        | -1.24533 | 0.38558  | 3643337  |
| ECM3        | -1.24595 | 0.433206 | 3635754  |
| CR_10500C_A | -1.24661 | 0.579731 | 3638982  |
| C1_06540C_A | -1.24679 | 0.394319 | 3639520  |
| RPT6        | -1.24695 | 0.310975 | 3643877  |
| C1_04110W_A | -1.24708 | 0.576596 | 3644699  |
| FAA2-3      | -1.24855 | 0.525102 | 3643125  |
| C2_02040W_A | -1.25023 | 0.408482 | 3635848  |
| C5_00350C_A | -1.25258 | 0.382447 | 3641554  |
| APE2        | -1.25361 | 0.41689  | 3647990  |
| C1_02950W_A | -1.25376 | 0.702211 | 3636833  |
| C2_01050W_A | -1.25384 | 0.692167 | 30515086 |
| GPI8        | -1.2542  | 0.425842 | 3646669  |
| C5_04360C_A | -1.25496 | 0.436977 | 3636483  |
| C1_01820C_A | -1.25555 | 0.435655 | 3645435  |
| C1_10190W_A | -1.25727 | 0.424379 | 3634785  |
| CR_06820W_A | -1.25806 | 0.651013 | 3647325  |
| C2_09360W_A | -1.25817 | 0.488682 | 3644109  |
| CPR6        | -1.25903 | 0.319864 | 3639020  |

|             |          |          |         |
|-------------|----------|----------|---------|
| TIF4631     | -1.2598  | 0.43022  | 3643880 |
| MED7        | -1.26059 | 0.621962 | 3638344 |
| C3_06600C_A | -1.26064 | 0.478414 | 3642280 |
| MET28       | -1.26111 | 0.442256 | 3637962 |
| C2_04570W_A | -1.26131 | 0.355265 | 3645441 |
| ISW2        | -1.26256 | 0.40682  | 3642235 |
| CR_09580C_A | -1.26294 | 0.379121 | 3647097 |
| SMC6        | -1.26338 | 0.334841 | 3637039 |
| C5_04630W_A | -1.26364 | 0.566916 | 3636395 |
| C7_01370W_A | -1.26388 | 0.545609 | 3645901 |
| C4_06430C_A | -1.26445 | 0.545018 | 3642794 |
| C1_11150W_A | -1.26469 | 0.498774 | 3648356 |
| C7_00450C_A | -1.26497 | 0.557646 | 3637991 |
| KIP4        | -1.26584 | 0.533933 | 3642032 |
| C3_05970C_A | -1.2669  | 0.310756 | 3641730 |
| TERT        | -1.267   | 0.486366 | 3640729 |
| C1_07950C_A | -1.26848 | 0.488766 | 3640724 |
| C1_09220W_A | -1.26943 | 0.375897 | 3634898 |
| PIF1        | -1.2695  | 0.358924 | 3646054 |
| C1_11770C_A | -1.27005 | 0.355501 | 3645327 |
| C6_02380W_A | -1.27092 | 0.389408 | 3645883 |
| PCD1        | -1.2711  | 0.434113 | 3647087 |
| PEX19       | -1.27149 | 0.381402 | 3642108 |
| MRT4        | -1.27153 | 0.393882 | 3639219 |
| C2_04080W_A | -1.27511 | 0.39235  | 3637381 |
| PGA25       | -1.27522 | 0.379155 | 3647890 |
| C1_14470W_A | -1.27573 | 0.436673 | 3643327 |
| GEF2        | -1.27598 | 0.360859 | 3644935 |
| SNX4        | -1.2782  | 0.334224 | 3638843 |
| C6_03430C_A | -1.27859 | 0.404198 | 3640273 |
| C7_03590C_A | -1.27978 | 0.375557 | 3646239 |
| RIM11       | -1.28032 | 0.312466 | 3648277 |
| C2_01250W_A | -1.28138 | 0.511541 | 3638793 |
| LYS144      | -1.2822  | 0.382052 | 3640512 |
| C3_05020W_A | -1.28222 | 0.528824 | 3635170 |
| FGR44       | -1.28227 | 0.33728  | 3635166 |
| LAP4        | -1.28566 | 0.499186 | 3646979 |
| C2_06780C_A | -1.28672 | 0.427563 | 3643516 |
| C7_00810W_A | -1.28784 | 0.330325 | 3637940 |
| C2_05980C_A | -1.28812 | 0.467396 | 3644075 |
| CR_10630W_A | -1.28835 | 0.58942  | 3639007 |
| C7_04140C_A | -1.28958 | 0.403811 | 3643129 |
| C2_06080C_A | -1.29058 | 0.434376 | 3644098 |
| ENG1        | -1.29351 | 0.449754 | 3636886 |
| CR_04180C_A | -1.29423 | 0.279242 | 3640937 |
| C4_00950C_A | -1.29478 | 0.3713   | 3635675 |
| C2_06430C_A | -1.295   | 0.53342  | 3646558 |

|             |          |          |         |
|-------------|----------|----------|---------|
| C4_02340W_A | -1.2963  | 0.361531 | 3637883 |
| FGR16       | -1.29691 | 0.618294 | 3644411 |
| PBS2        | -1.29713 | 0.27797  | 3641748 |
| HYR3        | -1.29841 | 0.269341 | 3644119 |
| C4_05980C_A | -1.29893 | 0.43295  | 3646516 |
| C3_03780W_A | -1.30152 | 0.659673 | 3645637 |
| RRP9        | -1.30232 | 0.369015 | 3642576 |
| C4_03190W_A | -1.30245 | 0.385161 | 3637838 |
| UTR2        | -1.30252 | 0.3154   | 3636591 |
| TRA1        | -1.30283 | 0.423016 | 3641644 |
| C5_00090C_A | -1.30452 | 0.353326 | 3647885 |
| C4_06440C_A | -1.30616 | 0.612404 | 3642793 |
| RCL1        | -1.30624 | 0.384538 | 3645199 |
| GCN3        | -1.30716 | 0.348867 | 3645905 |
| SPT23       | -1.30749 | 0.288272 | 3643958 |
| SEC6        | -1.30838 | 0.291506 | 3640565 |
| CR_10740W_A | -1.3112  | 0.427892 | 3638941 |
| C2_04870C_A | -1.31252 | 0.244038 | 3648111 |
| RPO21       | -1.31396 | 0.279047 | 3638991 |
| C3_02660W_A | -1.31586 | 0.808062 | 3638404 |
| C1_03100W_A | -1.31633 | 0.361448 | 3636925 |
| C1_12710C_A | -1.31692 | 0.366285 | 3646822 |
| C3_03330C_A | -1.31714 | 0.334606 | 3638364 |
| HYR4        | -1.31722 | 0.346685 | 3640436 |
| GLE1        | -1.31801 | 0.335599 | 3642340 |
| POX1        | -1.31826 | 0.30178  | 3640247 |
| NIK1        | -1.31919 | 0.262144 | 3641358 |
| C4_00470C_A | -1.3212  | 0.358206 | 3645011 |
| UTP4        | -1.32125 | 0.303468 | 3636657 |
| PRS1        | -1.32147 | 0.330906 | 3635817 |
| C7_01180W_A | -1.32201 | 0.411074 | 3645915 |
| PWP2        | -1.32307 | 0.255802 | 3640416 |
| GCD7        | -1.3234  | 0.356131 | 3637367 |
| STE50       | -1.32386 | 0.364039 | 3636660 |
| C1_03050W_A | -1.32391 | 0.250453 | 3636843 |
| USO6        | -1.32582 | 0.248997 | 3643647 |
| ABZ1        | -1.32612 | 0.269177 | 3648307 |
| CR_06640C_A | -1.32989 | 0.337406 | 3646619 |
| C4_07130W_A | -1.33028 | 0.24562  | 3642938 |
| BDF1        | -1.33108 | 0.28849  | 3641592 |
| C1_09040C_A | -1.33246 | 0.383342 | 3634769 |
| C2_10140W_A | -1.33298 | 0.534976 | 3643934 |
| C5_03570W_A | -1.3331  | 0.287333 | 3646976 |
| KAP120      | -1.3338  | 0.215123 | 3643110 |
| CR_07660C_A | -1.33439 | 0.305664 | 3647256 |
| MTG1        | -1.33451 | 0.359438 | 3645139 |
| C2_04820W_A | -1.33467 | 0.295646 | 3647776 |

|             |          |          |          |
|-------------|----------|----------|----------|
| C2_07000W_A | -1.33529 | 0.322999 | 3643534  |
| C4_06680C_A | -1.33583 | 0.216865 | 3642950  |
| SKN2        | -1.3367  | 0.383903 | 3638309  |
| C5_04990W_A | -1.33677 | 0.472376 | 3636538  |
| OFD1        | -1.33712 | 0.211923 | 3646962  |
| DOT4        | -1.34093 | 0.315036 | 3646810  |
| C3_07390C_A | -1.34196 | 0.323462 | 3638472  |
| C3_05330C_A | -1.34248 | 0.708835 | 3643650  |
| C1_04800C_A | -1.34262 | 0.703234 | 3644789  |
| C1_08180C_A | -1.34449 | 0.26054  | 3640743  |
| C4_02580W_A | -1.34659 | 0.756678 | 3637915  |
| CPP1        | -1.34678 | 0.23679  | 3634865  |
| ADH1        | -1.34699 | 0.30998  | 3636489  |
| FOX2        | -1.34711 | 0.24804  | 3648327  |
| C6_04650W_A | -1.3484  | 0.242393 | 3645979  |
| C3_00400C_A | -1.34889 | 0.309082 | 3640554  |
| C6_01850W_A | -1.34893 | 0.277404 | 3641629  |
| C1_04040C_A | -1.34966 | 0.266768 | 3646429  |
| SLA2        | -1.35028 | 0.202714 | 3643149  |
| C6_01980C_A | -1.35068 | 0.290091 | 3644560  |
| LEM3        | -1.35099 | 0.215194 | 3643456  |
| C1_10420C_A | -1.35181 | 0.274082 | 3647178  |
| SNP3        | -1.35291 | 0.520529 | 3640991  |
| C1_14410W_A | -1.35321 | 0.349364 | 3643293  |
| C1_12870C_A | -1.35334 | 0.597696 | 3636180  |
| SUV3        | -1.35352 | 0.24302  | 3645451  |
| CR_01440C_A | -1.35393 | 0.284086 | 30515374 |
| C3_04230W_A | -1.35408 | 0.301599 | 3635187  |
| RIX7        | -1.35489 | 0.26749  | 3637735  |
| ECM38       | -1.35591 | 0.528598 | 3645375  |
| RIB3        | -1.35646 | 0.243206 | 3642062  |
| RIT1        | -1.35717 | 0.38357  | 3638492  |
| RAD18       | -1.35763 | 0.488224 | 3641637  |
| ALG1        | -1.35824 | 0.419244 | 3646517  |
| ZCF6        | -1.3585  | 0.508369 | 3635837  |
| C5_05130C_A | -1.35942 | 0.457013 | 3636459  |
| CEM1        | -1.36058 | 0.456386 | 3635242  |
| HMI1        | -1.3611  | 0.328298 | 3638997  |
| ZPR1        | -1.36164 | 0.152524 | 3640177  |
| C3_04940W_A | -1.36232 | 0.219928 | 3635270  |
| TTR1        | -1.36393 | 0.194871 | 3639313  |
| C5_04350C_A | -1.36397 | 0.331242 | 3636482  |
| C1_00980W_A | -1.3645  | 0.366559 | 30514959 |
| CTF1        | -1.36454 | 0.3122   | 3635788  |
| CR_04370W_A | -1.36469 | 0.337809 | 3641004  |
| C7_00830C_A | -1.36888 | 0.240347 | 3637938  |
| C4_03160C_A | -1.36902 | 0.630145 | 3637841  |



|             |          |          |          |
|-------------|----------|----------|----------|
| C1_07280C_A | -1.37225 | 0.647051 | 30515021 |
| LPG20       | -1.37532 | 0.481682 | 3644780  |
| C3_03440C_A | -1.37572 | 0.449718 | 3638356  |
| RAX1        | -1.37578 | 0.251431 | 3635256  |
| C2_03140C_A | -1.37622 | 0.174025 | 3642992  |
| C7_02220C_A | -1.37634 | 0.268527 | 3636989  |
| C7_00270W_A | -1.37641 | 0.268144 | 3637977  |
| DBP3        | -1.37719 | 0.199578 | 3634868  |
| APC1        | -1.37757 | 0.214145 | 3639383  |
| GLE2        | -1.37759 | 0.223225 | 3646293  |
| TAF19       | -1.37885 | 0.395543 | 3641396  |
| SLU7        | -1.37924 | 0.345735 | 3638501  |
| MIG1        | -1.37935 | 0.261628 | 3637812  |
| C2_03260W_A | -1.37938 | 0.311683 | 3637432  |
| C5_01920C_A | -1.37952 | 0.255399 | 3643742  |
| CIC1        | -1.38048 | 0.265728 | 3644059  |
| RBR3        | -1.38169 | 0.275822 | 3646728  |
| CRZ1        | -1.38202 | 0.282585 | 3641722  |
| SNF7        | -1.383   | 0.1721   | 3639377  |
| CTA6        | -1.38369 | 0.329072 | 3642907  |
| C5_00790C_A | -1.38466 | 0.220837 | 3644125  |
| C5_03040W_A | -1.38514 | 0.431972 | 3637824  |
| KIC1        | -1.38515 | 0.186958 | 3647784  |
| C1_06410W_A | -1.3853  | 0.363702 | 3639555  |
| RVS162      | -1.38538 | 0.44417  | 3646820  |
| UTP5        | -1.38562 | 0.169664 | 3638922  |
| PRR2        | -1.38596 | 0.542889 | 3646723  |
| MST1        | -1.38628 | 0.288899 | 3636831  |
| C6_03220W_A | -1.38719 | 0.378984 | 3639179  |
| CHT1        | -1.38731 | 0.444622 | 3639704  |
| NSA1        | -1.38747 | 0.297449 | 3642313  |
| DJP1        | -1.38758 | 0.176213 | 3647186  |
| CFL1        | -1.38801 | 0.412865 | 3641810  |
| C7_01960W_A | -1.38846 | 0.348968 | 3636969  |
| C2_08240W_A | -1.38917 | 0.212862 | 3642344  |
| ECM1        | -1.38947 | 0.269596 | 3641224  |
| SGS1        | -1.39046 | 0.281885 | 3641258  |
| SOL1        | -1.39112 | 0.316576 | 3645627  |
| C2_07740W_A | -1.39243 | 0.16236  | 3642302  |
| C2_09860C_A | -1.39344 | 0.538053 | 3643781  |
| ABD1        | -1.39454 | 0.275418 | 3638456  |
| LIG1        | -1.39647 | 0.170855 | 3636947  |
| FGR27       | -1.39682 | 0.190303 | 3646988  |
| C5_00400C_A | -1.39846 | 0.277227 | 3641550  |
| SDA1        | -1.39871 | 0.149465 | 3646688  |
| ARX1        | -1.39905 | 0.173734 | 3636811  |
| C7_00840C_A | -1.39967 | 0.431458 | 3638057  |

|             |          |          |          |
|-------------|----------|----------|----------|
| SKP1        | -1.39992 | 0.174406 | 3644485  |
| CR_02780W_A | -1.40085 | 0.746902 | 3642582  |
| C5_04480C_A | -1.40085 | 0.747039 | 30515317 |
| C2_01040W_A | -1.40114 | 0.743628 | 30515085 |
| C4_01340W_A | -1.40129 | 0.750999 | 3635601  |
| SAP6        | -1.40138 | 0.751875 | 3639229  |
| CR_06320C_A | -1.40233 | 0.277809 | 3644845  |
| CR_08500W_A | -1.40274 | 0.183542 | 3642136  |
| MNN22       | -1.40359 | 0.262778 | 3641117  |
| C3_04840C_A | -1.40385 | 0.318864 | 3635224  |
| C1_00520W_A | -1.40411 | 0.213733 | 3639310  |
| CR_05750W_A | -1.40429 | 0.308311 | 3646696  |
| ALR1        | -1.40591 | 0.201143 | 3636616  |
| C1_00570C_A | -1.40648 | 0.243598 | 3639362  |
| PTC4        | -1.40665 | 0.325205 | 3646697  |
| C7_01170C_A | -1.40716 | 0.278401 | 3645914  |
| C5_02140C_A | -1.40735 | 0.18566  | 3637752  |
| EST3        | -1.40744 | 0.617217 | 3640551  |
| BMS1        | -1.40782 | 0.182889 | 3639857  |
| C2_04740C_A | -1.40973 | 0.565056 | 3647786  |
| C1_10890C_A | -1.41029 | 0.264149 | 3644447  |
| LYS143      | -1.41035 | 0.495824 | 3634894  |
| CR_06010W_A | -1.41093 | 0.399702 | 3644870  |
| C1_11110C_A | -1.41094 | 0.395378 | 3644413  |
| C2_08510W_A | -1.41134 | 0.442862 | 3643922  |
| STP1        | -1.41186 | 0.273036 | 3635152  |
| MSO1        | -1.41209 | 0.298993 | 3642040  |
| CR_06330C_A | -1.41673 | 0.29945  | 3644846  |
| C3_05990C_A | -1.41928 | 0.591826 | 3641732  |
| C2_06490W_A | -1.41935 | 0.189999 | 3646569  |
| RVS167      | -1.42082 | 0.146285 | 3647831  |
| C2_09460C_A | -1.42171 | 0.214693 | 3647713  |
| C2_08100W_A | -1.42209 | 0.196375 | 3642334  |
| PEP7        | -1.42261 | 0.353222 | 3645001  |
| C1_02220C_A | -1.42272 | 0.298351 | 3644595  |
| C1_10250C_A | -1.42275 | 0.440178 | 3634882  |
| C5_05460C_A | -1.42384 | 0.426589 | 3636527  |
| CR_03220C_A | -1.42793 | 0.49136  | 3645128  |
| AFG3        | -1.42883 | 0.123483 | 3636589  |
| C2_10300C_A | -1.42884 | 0.464177 | 3643955  |
| C7_03040W_A | -1.42977 | 0.455083 | 3641379  |
| C1_05420W_A | -1.4304  | 0.362186 | 3642493  |
| EAF3        | -1.43102 | 0.259918 | 3648318  |
| CR_09740W_A | -1.4313  | 0.15515  | 3639008  |
| C1_13810W_A | -1.43233 | 0.26406  | 3636126  |
| C2_07020C_A | -1.43413 | 0.28269  | 3643497  |
| RAT1        | -1.43481 | 0.129001 | 3635686  |

|             |          |          |         |
|-------------|----------|----------|---------|
| JAB1        | -1.43582 | 0.158945 | 3646811 |
| DOS2        | -1.43597 | 0.143623 | 3636183 |
| C1_06910C_A | -1.43682 | 0.208902 | 3639526 |
| C3_06280W_A | -1.43702 | 0.205628 | 3642238 |
| HAP3        | -1.43819 | 0.665792 | 3635629 |
| C1_02200C_A | -1.43861 | 0.418394 | 3644593 |
| C5_02620C_A | -1.43895 | 0.194005 | 3637783 |
| C1_06380C_A | -1.43919 | 0.393052 | 3639559 |
| C1_12610W_A | -1.43968 | 0.177321 | 3646825 |
| ESS1        | -1.44108 | 0.202511 | 3647989 |
| HAS1        | -1.44538 | 0.140746 | 3636443 |
| C2_00750W_A | -1.44582 | 0.552819 | 3638911 |
| C4_07060W_A | -1.44608 | 0.140507 | 3642908 |
| SPT7        | -1.44639 | 0.131897 | 3638928 |
| PPS1        | -1.44963 | 0.395394 | 3646526 |
| CR_10230W_A | -1.44976 | 0.126071 | 3638921 |
| C1_09950C_A | -1.44984 | 0.187845 | 3634861 |
| C2_10740C_A | -1.45067 | 0.167336 | 3641236 |
| C4_04550C_A | -1.45345 | 0.177985 | 3641106 |
| IPK2        | -1.45513 | 0.20538  | 3643784 |
| CR_00040C_A | -1.45535 | 0.163291 | 3639675 |
| ALO1        | -1.45811 | 0.124314 | 3638983 |
| ZCF13       | -1.45892 | 0.18397  | 3646354 |
| C4_06090C_A | -1.45894 | 0.2347   | 3646532 |
| C4_00560C_A | -1.45934 | 0.267795 | 3645744 |
| GLK4        | -1.45997 | 0.277289 | 3646046 |
| DBR1        | -1.46008 | 0.364544 | 3647560 |
| C2_10850C_A | -1.4611  | 0.126731 | 3641232 |
| C1_13380W_A | -1.46126 | 0.27846  | 3636217 |
| C3_05160C_A | -1.46128 | 0.100967 | 3635229 |
| C4_02960W_A | -1.46198 | 0.182408 | 3637873 |
| SSD1        | -1.46302 | 0.132795 | 3636520 |
| GAL7        | -1.46311 | 0.227817 | 3644591 |
| C1_00100C_A | -1.46322 | 0.213755 | 3639325 |
| CR_05550C_A | -1.4633  | 0.094285 | 3647593 |
| C7_03860W_A | -1.46339 | 0.107356 | 3643144 |
| C2_00890W_A | -1.4646  | 0.643933 | 3638896 |
| CR_07850W_A | -1.46479 | 0.231038 | 3647347 |
| C5_05000C_A | -1.46556 | 0.16572  | 3636539 |
| ZCF31       | -1.46616 | 0.157416 | 3635191 |
| CR_03310C_A | -1.47039 | 0.123101 | 3645097 |
| C6_02330W_A | -1.47082 | 0.307554 | 3645877 |
| ENP1        | -1.47174 | 0.169521 | 3647861 |
| C4_04200C_A | -1.47282 | 0.570054 | 3641182 |
| C2_01530C_A | -1.4739  | 0.125712 | 3635803 |
| C2_00860C_A | -1.47479 | 0.627429 | 3638805 |
| C5_03560W_A | -1.47482 | 0.16102  | 3646975 |

|             |          |          |          |
|-------------|----------|----------|----------|
| IRA2        | -1.47533 | 0.086331 | 3642011  |
| C3_07240W_A | -1.47535 | 0.623486 | 3638530  |
| C2_04750W_A | -1.47605 | 0.242647 | 3647785  |
| C1_00030C_A | -1.4767  | 0.24528  | 3639373  |
| IPT1        | -1.47727 | 0.120849 | 3634941  |
| GLG2        | -1.47819 | 0.289345 | 3642282  |
| MIM1        | -1.47847 | 0.269456 | 30515394 |
| C1_13240W_A | -1.48027 | 0.171232 | 3636167  |
| FGR22       | -1.48176 | 0.393173 | 3635862  |
| CR_07320C_A | -1.4825  | 0.117673 | 3646057  |
| DBP8        | -1.48332 | 0.131621 | 3646692  |
| C2_02440W_A | -1.48382 | 0.133097 | 3635758  |
| ZCF21       | -1.4853  | 0.087438 | 3645762  |
| C3_00510W_A | -1.4859  | 0.354967 | 3640514  |
| C4_01930C_A | -1.48617 | 0.335789 | 3635634  |
| C2_03690C_A | -1.48741 | 0.146158 | 3637376  |
| CDC4        | -1.48754 | 0.057853 | 3640125  |
| CR_01360W_A | -1.4877  | 0.457902 | 3640167  |
| C3_03530W_A | -1.48814 | 0.466035 | 3638312  |
| PGA13       | -1.48824 | 0.468394 | 3642138  |
| C4_00030C_A | -1.48881 | 0.224775 | 3648055  |
| SRT1        | -1.49031 | 0.36473  | 3642020  |
| DOT5        | -1.49031 | 0.139364 | 3640519  |
| MUB1        | -1.49197 | 0.11011  | 3642246  |
| C2_09280C_A | -1.49234 | 0.265167 | 3644102  |
| PDE1        | -1.49279 | 0.143525 | 3637713  |
| CR_08940W_A | -1.49331 | 0.116513 | 3641914  |
| C7_03980W_A | -1.4964  | 0.271993 | 3643116  |
| CR_02950C_A | -1.49678 | 0.200382 | 3642590  |
| C6_01350W_A | -1.4976  | 0.113967 | 3641642  |
| C6_01080C_A | -1.49946 | 0.383634 | 3644019  |
| SRB8        | -1.49984 | 0.122182 | 3641128  |
| C2_03890W_A | -1.50081 | 0.537281 | 3637396  |
| TRM9        | -1.50083 | 0.243314 | 3642074  |
| HGT8        | -1.50611 | 0.124838 | 3638875  |
| CR_10810C_A | -1.50622 | 0.196336 | 3638949  |
| C1_00790W_A | -1.50691 | 0.553412 | 3639348  |
| UBR1        | -1.50726 | 0.067746 | 3637871  |
| C3_02180C_A | -1.50755 | 0.113332 | 3636643  |
| C3_00380C_A | -1.50807 | 0.214235 | 3640540  |
| C4_01500W_A | -1.50858 | 0.145679 | 3635617  |
| C1_10880W_A | -1.51079 | 0.177848 | 3644449  |
| SPR28       | -1.51093 | 0.391385 | 3637716  |
| MDG1        | -1.51105 | 0.162632 | 3643311  |
| C1_01750W_A | -1.51147 | 0.33658  | 3645413  |
| C2_04620W_A | -1.51281 | 0.09124  | 3645438  |
| C1_06440C_A | -1.51384 | 0.130589 | 3639552  |

|             |          |          |          |
|-------------|----------|----------|----------|
| C3_01560W_A | -1.51551 | 0.088868 | 3636669  |
| C4_06150C_A | -1.51573 | 0.713541 | 3642820  |
| C7_00610C_A | -1.51596 | 0.125706 | 3638030  |
| CTA3        | -1.51706 | 0.113783 | 3645333  |
| CUE5        | -1.52041 | 0.123854 | 3642467  |
| C4_03930C_A | -1.52172 | 0.258318 | 30515262 |
| CR_07750C_A | -1.52175 | 0.100319 | 3647350  |
| C2_05400W_A | -1.52288 | 0.369363 | 3643435  |
| C7_00310C_A | -1.52453 | 0.352242 | 3638045  |
| DAD2        | -1.52481 | 0.507709 | 3643465  |
| C1_03360W_A | -1.52499 | 0.105997 | 3636889  |
| NTG1        | -1.5253  | 0.255077 | 3640746  |
| C3_02360C_A | -1.52534 | 0.501869 | 3636617  |
| C3_03690W_A | -1.52569 | 0.426753 | 3645647  |
| GYP5        | -1.52696 | 0.059157 | 3641246  |
| C3_06490W_A | -1.52808 | 0.129901 | 3642285  |
| SAP2        | -1.52895 | 0.121881 | 3647354  |
| C1_01040W_A | -1.52988 | 0.226922 | 3640183  |
| ENP2        | -1.53052 | 0.116132 | 3646234  |
| SUI3        | -1.5306  | 0.060985 | 3643130  |
| FKH2        | -1.53149 | 0.104815 | 3640536  |
| RRP8        | -1.53239 | 0.102412 | 3643900  |
| C2_02630W_A | -1.53313 | 0.183288 | 3635839  |
| C2_00700W_A | -1.53423 | 0.057985 | 3638884  |
| C2_07760W_A | -1.53569 | 0.093032 | 3642298  |
| RIM2        | -1.53592 | 0.172993 | 3645448  |
| C1_11300C_A | -1.53669 | 0.115253 | 3644552  |
| C3_05950W_A | -1.53787 | 0.25675  | 3641728  |
| CTA26       | -1.5393  | 0.201898 | 3638965  |
| MSS116      | -1.54014 | 0.094959 | 3634792  |
| CR_03180W_A | -1.54033 | 0.115348 | 3645133  |
| C2_08180C_A | -1.54229 | 0.110936 | 3642317  |
| C6_01380C_A | -1.54533 | 0.248466 | 3641606  |
| C1_06070W_A | -1.54549 | 0.11604  | 3639824  |
| C6_00310W_A | -1.54824 | 0.046536 | 3646071  |
| C1_05360C_A | -1.54864 | 0.068672 | 3642482  |
| COX15       | -1.54912 | 0.067393 | 3647071  |
| C3_00390W_A | -1.55051 | 0.382969 | 3640539  |
| MSS11       | -1.55061 | 0.174134 | 3647296  |
| CAS4        | -1.55135 | 0.106765 | 3636568  |
| C4_01280C_A | -1.55161 | 0.121534 | 3635700  |
| IMP4        | -1.55449 | 0.067354 | 3644138  |
| C4_00070C_A | -1.55534 | 0.057107 | 3648063  |
| C7_01490W_A | -1.55567 | 0.100517 | 3637051  |
| NOG1        | -1.5562  | 0.106098 | 3641736  |
| KCS1        | -1.55872 | 0.170457 | 3648120  |
| LYP1        | -1.55874 | 0.33129  | 6335417  |

|             |          |          |          |
|-------------|----------|----------|----------|
| C2_07410W_A | -1.55937 | 0.155978 | 3645203  |
| SLN1        | -1.56096 | 0.073689 | 3640422  |
| C4_01990W_A | -1.5611  | 0.578675 | 30515246 |
| CR_08190W_A | -1.56141 | 0.307052 | 3642084  |
| HTS1        | -1.56189 | 0.079161 | 3636532  |
| FRP6        | -1.56334 | 0.074428 | 3641601  |
| ZCF23       | -1.56538 | 0.109933 | 3644477  |
| CKB1        | -1.56601 | 0.075886 | 3638799  |
| C2_01820C_A | -1.56637 | 0.177093 | 3635831  |
| SFU1        | -1.56669 | 0.157654 | 3634867  |
| MTLA1       | -1.56714 | 0.301559 | 3643729  |
| C5_03410C_A | -1.56853 | 0.149799 | 3646347  |
| DAL1        | -1.57004 | 0.266204 | 3640564  |
| ZCF15       | -1.57031 | 0.123134 | 3637867  |
| C4_07200C_A | -1.57038 | 0.159391 | 3642958  |
| C1_00880W_A | -1.57151 | 0.314252 | 3639355  |
| SAC7        | -1.57181 | 0.121565 | 3638010  |
| C3_00450C_A | -1.57235 | 0.08582  | 3640548  |
| DRS1        | -1.58172 | 0.060538 | 3639045  |
| C2_01370C_A | -1.58179 | 0.073626 | 3635723  |
| CRL1        | -1.58268 | 0.077209 | 3640238  |
| SCO1        | -1.58314 | 0.083331 | 3641922  |
| C3_01780C_A | -1.58333 | 0.490241 | 30515179 |
| C6_00390W_A | -1.58503 | 0.071261 | 3646086  |
| PRP13       | -1.58724 | 0.157832 | 3643194  |
| C2_09420W_A | -1.58755 | 0.140357 | 3647718  |
| C1_09340C_A | -1.58793 | 0.166121 | 3634804  |
| ARG5,6      | -1.5895  | 0.07144  | 3634830  |
| DFG5        | -1.59157 | 0.055216 | 3638867  |
| ZCF18       | -1.59231 | 0.124106 | 3641635  |
| CR_00980C_A | -1.59285 | 0.051699 | 3640426  |
| C3_02750W_A | -1.593   | 0.304436 | 3638411  |
| C1_08240C_A | -1.59365 | 0.215733 | 3640759  |
| C1_10080W_A | -1.59411 | 0.19325  | 3634814  |
| ELF1        | -1.59428 | 0.123777 | 3641903  |
| URA7        | -1.59587 | 0.069324 | 3636510  |
| C3_03310C_A | -1.59643 | 0.249719 | 3638363  |
| C2_03410W_A | -1.59664 | 0.041779 | 3637412  |
| C7_00940W_A | -1.597   | 0.075334 | 3637955  |
| C2_00170C_A | -1.59755 | 0.088087 | 3638906  |
| DOT6        | -1.59909 | 0.068509 | 3640078  |
| C3_07590W_A | -1.5992  | 0.301955 | 3638496  |
| C1_14550C_A | -1.59934 | 0.267768 | 3643334  |
| C7_02460C_A | -1.60014 | 0.088224 | 3636946  |
| C2_04120C_A | -1.6006  | 0.071291 | 3637377  |
| DUO1        | -1.60069 | 0.303656 | 3646858  |
| C2_03880C_A | -1.60174 | 0.446604 | 30515108 |

|             |          |          |         |
|-------------|----------|----------|---------|
| C5_04640C_A | -1.602   | 0.128563 | 3636397 |
| CR_10750C_A | -1.60216 | 0.145819 | 3638942 |
| HAP31       | -1.60232 | 0.386694 | 3640994 |
| CR_01720W_A | -1.60416 | 0.14052  | 3640114 |
| C4_02170C_A | -1.60419 | 0.295133 | 3635667 |
| C5_00760W_A | -1.60598 | 0.054577 | 3644122 |
| UBI4        | -1.6061  | 0.091205 | 3638432 |
| C1_06970C_A | -1.60656 | 0.094155 | 3639567 |
| YAF9        | -1.60916 | 0.130702 | 3647864 |
| PEX2        | -1.60949 | 0.154816 | 3643460 |
| C4_00420C_A | -1.60984 | 0.116307 | 3645021 |
| SWR1        | -1.61019 | 0.092329 | 3645220 |
| C5_01220W_A | -1.61237 | 0.193368 | 3642620 |
| C2_00810C_A | -1.61312 | 0.188508 | 3638810 |
| NOP14       | -1.61317 | 0.054678 | 3635266 |
| C1_04490W_A | -1.61381 | 0.048481 | 3646145 |
| C1_02800W_A | -1.61389 | 0.442503 | 3636873 |
| TGL99       | -1.6139  | 0.125118 | 3636168 |
| PDK2        | -1.61501 | 0.065129 | 3641876 |
| POS5        | -1.61511 | 0.166596 | 3638519 |
| BUD6        | -1.61685 | 0.096734 | 3640727 |
| TRY2        | -1.61794 | 0.081561 | 3647670 |
| C1_05280W_A | -1.61831 | 0.16423  | 3642475 |
| CDH1        | -1.61881 | 0.07308  | 3638814 |
| TPK1        | -1.62077 | 0.036805 | 3634879 |
| CR_03080C_A | -1.62121 | 0.185574 | 3645104 |
| C1_13950C_A | -1.62163 | 0.485361 | 3636186 |
| C7_03270W_A | -1.62166 | 0.057001 | 3641365 |
| C3_07380W_A | -1.62235 | 0.068986 | 3638473 |
| MED15       | -1.62595 | 0.056189 | 3640761 |
| C4_02860W_A | -1.62601 | 0.063769 | 3637909 |
| C1_05650W_A | -1.62852 | 0.133316 | 3639838 |
| C5_02560C_A | -1.62885 | 0.089334 | 3637719 |
| C6_00520W_A | -1.62893 | 0.39534  | 3647147 |
| C5_04290C_A | -1.6311  | 0.045468 | 3636455 |
| C2_05380W_A | -1.63154 | 0.078212 | 3643432 |
| SPB4        | -1.63235 | 0.094281 | 3647252 |
| CCT8        | -1.6327  | 0.040196 | 3639324 |
| C4_07010C_A | -1.63601 | 0.280848 | 3642966 |
| C4_02850W_A | -1.63611 | 0.063916 | 3637910 |
| STE2        | -1.63642 | 0.534108 | 3646630 |
| C7_00460W_A | -1.63649 | 0.544787 | 3637990 |
| C7_03150W_A | -1.63653 | 0.539221 | 3641346 |
| C2_02230C_A | -1.63659 | 0.538636 | 3635775 |
| GCD2        | -1.63679 | 0.087813 | 3638437 |
| C1_00890W_A | -1.63729 | 0.076719 | 3639354 |
| CGR1        | -1.63741 | 0.140007 | 3637853 |

|             |          |          |          |
|-------------|----------|----------|----------|
| C4_06230C_A | -1.63773 | 0.052428 | 3642808  |
| DAL81       | -1.63839 | 0.126686 | 3640419  |
| C2_09160W_A | -1.63885 | 0.098034 | 3644090  |
| C2_03150C_A | -1.63926 | 0.165595 | 3642990  |
| C5_00330C_A | -1.64082 | 0.16383  | 3641556  |
| SRP40       | -1.64208 | 0.074581 | 3642605  |
| C5_02010C_A | -1.64347 | 0.047806 | 3643772  |
| C1_00430W_A | -1.64408 | 0.091961 | 3639285  |
| CR_00820C_A | -1.6441  | 0.097004 | 3640413  |
| C5_02690W_A | -1.64575 | 0.176346 | 3637775  |
| C2_06620W_A | -1.64612 | 0.212286 | 3646564  |
| ADE8        | -1.64665 | 0.072819 | 3642999  |
| SSF1        | -1.64718 | 0.062857 | 3647085  |
| C2_05270W_A | -1.6476  | 0.068627 | 3643470  |
| FTH2        | -1.65236 | 0.124489 | 3640401  |
| C1_08540C_A | -1.65242 | 0.019954 | 3646497  |
| C3_07100C_A | -1.65867 | 0.062046 | 3638443  |
| PAM18       | -1.65994 | 0.070033 | 3645747  |
| C3_03920W_A | -1.66123 | 0.115663 | 30515197 |
| AFG1        | -1.66135 | 0.195222 | 3634920  |
| C2_02120W_A | -1.66234 | 0.045325 | 3635746  |
| CR_06470W_A | -1.66471 | 0.042256 | 3645277  |
| CR_03070W_A | -1.66552 | 0.050442 | 3645105  |
| MNN14       | -1.66789 | 0.047727 | 3643651  |
| C3_00340W_A | -1.66792 | 0.158408 | 3640544  |
| PGA5        | -1.66999 | 0.633798 | 3644575  |
| C4_00580W_A | -1.67296 | 0.169906 | 3645773  |
| SAP4        | -1.67321 | 0.618899 | 3640257  |
| C1_12000C_A | -1.67321 | 0.619052 | 3642041  |
| MRV1        | -1.67332 | 0.616816 | 3635610  |
| C4_06220C_A | -1.67332 | 0.61741  | 3642814  |
| C3_04170W_A | -1.67332 | 0.617668 | 3635182  |
| THI4        | -1.67349 | 0.616191 | 3635160  |
| AFT2        | -1.67419 | 0.063419 | 3643511  |
| STI1        | -1.67505 | 0.019424 | 3643758  |
| MTG2        | -1.67528 | 0.071667 | 3646693  |
| SCW11       | -1.67649 | 0.350216 | 3636521  |
| C7_03210W_A | -1.67649 | 0.120879 | 3641371  |
| MET16       | -1.6765  | 0.062348 | 3642964  |
| PAN1        | -1.6767  | 0.099761 | 3637386  |
| C2_01190C_A | -1.67779 | 0.16732  | 3638859  |
| C3_02720W_A | -1.67843 | 0.189203 | 3638410  |
| C1_03830C_A | -1.68026 | 0.061281 | 3644678  |
| C2_02710C_A | -1.68079 | 0.057514 | 3643003  |
| C1_00310W_A | -1.68159 | 0.078528 | 3639298  |
| PRP22       | -1.68205 | 0.041167 | 3636404  |
| C6_00640C_A | -1.68308 | 0.110853 | 3647134  |



|             |          |          |          |
|-------------|----------|----------|----------|
| C3_01190C_A | -1.68316 | 0.033128 | 3647961  |
| C1_12950W_A | -1.6835  | 0.050745 | 3636157  |
| ZNC1        | -1.68366 | 0.029    | 3643754  |
| ROT1        | -1.68377 | 0.115078 | 3639350  |
| CR_00230W_A | -1.68391 | 0.02856  | 3639698  |
| SFL1        | -1.68461 | 0.01883  | 3642498  |
| C4_00290C_A | -1.68501 | 0.545872 | 3644994  |
| NOC4        | -1.68665 | 0.048303 | 3645224  |
| OLE1        | -1.68704 | 0.058155 | 3640755  |
| YPS7        | -1.68758 | 0.053039 | 3636937  |
| C7_03850W_A | -1.68809 | 0.040477 | 3643145  |
| C4_06280C_A | -1.68895 | 0.26889  | 3642802  |
| CR_00370W_A | -1.68904 | 0.071899 | 3639684  |
| C2_09670C_A | -1.68926 | 0.034566 | 3643792  |
| PRN2        | -1.69077 | 0.179988 | 3639879  |
| CR_08710W_A | -1.69079 | 0.027525 | 3642131  |
| FUR4        | -1.69143 | 0.145061 | 3638305  |
| C1_07150W_A | -1.69263 | 0.227218 | 30515019 |
| C1_07080W_A | -1.69357 | 0.145451 | 3639489  |
| C3_05380W_A | -1.70016 | 0.176891 | 3643679  |
| CR_01410C_A | -1.70095 | 0.046546 | 3640136  |
| PHO4        | -1.70136 | 0.071928 | 3641817  |
| COX9        | -1.70204 | 0.063521 | 30515131 |
| C1_06470W_A | -1.70463 | 0.048805 | 30515007 |
| CR_03780C_A | -1.70544 | 0.28974  | 3643179  |
| CR_01370C_A | -1.70885 | 0.053308 | 3640168  |
| PGK1        | -1.70886 | 0.068656 | 3647081  |
| NMD3        | -1.7091  | 0.023929 | 3646614  |
| SET2        | -1.70917 | 0.026682 | 3643923  |
| MRPL27      | -1.70931 | 0.04702  | 3636884  |
| C1_09390W_A | -1.71057 | 0.109329 | 3634851  |
| C1_03840W_A | -1.71459 | 0.390223 | 30514984 |
| C2_05160C_A | -1.71535 | 0.027354 | 3643461  |
| CR_03620C_A | -1.71635 | 0.023842 | 3643182  |
| GUT1        | -1.71709 | 0.051666 | 3648082  |
| C2_08860W_A | -1.71765 | 0.021952 | 3645776  |
| C1_01160C_A | -1.71796 | 0.029611 | 3640204  |
| VAC7        | -1.71877 | 0.05052  | 3646849  |
| C5_02510C_A | -1.71968 | 0.035009 | 3637767  |
| BEM1        | -1.72086 | 0.031044 | 3635627  |
| PTH1        | -1.72136 | 0.030147 | 3637710  |
| PDC12       | -1.72156 | 0.301724 | 3635591  |
| C6_01090C_A | -1.7222  | 0.305245 | 3644020  |
| TEC1        | -1.72254 | 0.117267 | 3635261  |
| C3_02020W_A | -1.72312 | 0.020378 | 3636592  |
| C1_00380C_A | -1.72316 | 0.059851 | 3639292  |
| SRP54       | -1.7234  | 0.023591 | 3640377  |

|             |          |          |         |
|-------------|----------|----------|---------|
| ZCF38       | -1.72403 | 0.039636 | 3639705 |
| ROM2        | -1.72417 | 0.025901 | 3637434 |
| C1_08710W_A | -1.7247  | 0.066008 | 3634937 |
| CR_02460W_A | -1.7273  | 0.038984 | 3644922 |
| ERG3        | -1.72809 | 0.055614 | 3644776 |
| C1_11850W_A | -1.72892 | 0.02651  | 3642010 |
| ZCF20       | -1.7293  | 0.038194 | 3647059 |
| MED9        | -1.73091 | 0.148945 | 3643134 |
| CR_08330W_A | -1.73183 | 0.070375 | 3642080 |
| MRPL36      | -1.73249 | 0.044099 | 3643733 |
| MSS51       | -1.73285 | 0.020571 | 3639031 |
| GCN1        | -1.73293 | 0.044297 | 3641256 |
| HAP43       | -1.73371 | 0.011304 | 3644531 |
| CR_09480W_A | -1.73561 | 0.048692 | 3641939 |
| CYR1        | -1.73594 | 0.019277 | 3641407 |
| C1_11160C_A | -1.73669 | 0.094511 | 3644399 |
| C1_04510W_A | -1.73692 | 0.119736 | 3646147 |
| C1_12250C_A | -1.73749 | 0.027003 | 3642022 |
| C1_04820C_A | -1.73763 | 0.129612 | 3644787 |
| CDC37       | -1.73826 | 0.030303 | 3639210 |
| C2_07510W_A | -1.73915 | 0.202845 | 3645208 |
| CR_04270C_A | -1.7394  | 0.390299 | 3640992 |
| WOR1        | -1.74089 | 0.623158 | 3634781 |
| C7_00160C_A | -1.74318 | 0.036574 | 3637972 |
| C2_03460C_A | -1.74583 | 0.050899 | 3637348 |
| CR_07030C_A | -1.74635 | 0.077413 | 3645730 |
| GRX3        | -1.74674 | 0.027482 | 3637858 |
| FPG1        | -1.74699 | 0.018971 | 3641632 |
| C4_00750C_A | -1.74836 | 0.155629 | 3645763 |
| ACE2        | -1.74859 | 0.082793 | 3646034 |
| RMP1        | -1.74982 | 0.242722 | 3636215 |
| C4_01300W_A | -1.75032 | 0.029935 | 3635605 |
| BRF1        | -1.75057 | 0.019522 | 3646689 |
| C7_03000C_A | -1.75134 | 0.081598 | 3641383 |
| C5_04050W_A | -1.75213 | 0.022202 | 3647735 |
| GCY1        | -1.75514 | 0.418452 | 3638477 |
| SCS7        | -1.75718 | 0.008908 | 3641157 |
| C2_06550W_A | -1.76121 | 0.244067 | 3646559 |
| NIP7        | -1.76159 | 0.07484  | 3645880 |
| MRPL40      | -1.76231 | 0.022089 | 3640968 |
| POP4        | -1.76251 | 0.067115 | 3639241 |
| C4_06790W_A | -1.76556 | 0.01676  | 3642918 |
| C5_02320C_A | -1.76606 | 0.075215 | 3637788 |
| TPT1        | -1.76638 | 0.059499 | 3640543 |
| NOG2        | -1.76756 | 0.023253 | 3640299 |
| RIB1        | -1.76843 | 0.043796 | 3642607 |
| C1_02940C_A | -1.76929 | 0.037778 | 3636832 |

|             |          |          |         |
|-------------|----------|----------|---------|
| C6_02110W_A | -1.77019 | 0.159296 | 3647553 |
| EST1        | -1.77247 | 0.011553 | 3636526 |
| C2_03000C_A | -1.77833 | 0.052563 | 3643022 |
| C5_05140W_A | -1.77859 | 0.079829 | 3636460 |
| C7_01720W_A | -1.78042 | 0.034576 | 3637011 |
| MAK21       | -1.78754 | 0.015662 | 3635147 |
| C2_02200W_A | -1.78783 | 0.080588 | 3635772 |
| C1_01540W_A | -1.78804 | 0.015829 | 3640233 |
| C3_03100C_A | -1.78947 | 0.024929 | 3638399 |
| IFM1        | -1.79068 | 0.012443 | 3641389 |
| C1_12540W_A | -1.79397 | 0.23161  | 3647607 |
| CR_06840W_A | -1.79504 | 0.022062 | 3647322 |
| NOP8        | -1.79523 | 0.035879 | 3646290 |
| C3_02350W_A | -1.79646 | 0.019187 | 3636618 |
| C3_05760W_A | -1.79678 | 0.079419 | 3641720 |
| C2_08450W_A | -1.7973  | 0.030128 | 3643905 |
| C1_05800C_A | -1.79753 | 0.157259 | 3639887 |
| C2_02580W_A | -1.79901 | 0.021932 | 3635860 |
| C1_13560W_A | -1.79932 | 0.051982 | 3636174 |
| TDH3        | -1.8006  | 0.085677 | 3638540 |
| C7_00430W_A | -1.80084 | 0.049617 | 3637993 |
| IAH1        | -1.8009  | 0.049641 | 3638945 |
| C5_01430C_A | -1.80158 | 0.058586 | 3647056 |
| C4_03850W_A | -1.80217 | 0.013322 | 3647853 |
| SWI1        | -1.80359 | 0.041864 | 3644996 |
| C5_03460C_A | -1.80742 | 0.077712 | 3646345 |
| FLU1        | -1.80887 | 0.024254 | 3637048 |
| C1_11900C_A | -1.8091  | 0.069729 | 3642005 |
| JIP5        | -1.80919 | 0.023608 | 3634922 |
| CR_01130W_A | -1.81105 | 0.038172 | 3640433 |
| C2_07630C_A | -1.8121  | 0.011176 | 3645193 |
| FET3        | -1.81258 | 0.084713 | 3647153 |
| PEL1        | -1.8151  | 0.04196  | 3637989 |
| PGM2        | -1.816   | 0.020623 | 3642562 |
| CR_09610C_A | -1.81697 | 0.028728 | 3647094 |
| CR_04310C_A | -1.81738 | 0.069023 | 3640996 |
| CRH12       | -1.81755 | 0.012696 | 3636447 |
| C7_03580C_A | -1.81848 | 0.075552 | 3646238 |
| PPG1        | -1.81905 | 0.102794 | 3641143 |
| C1_12440W_A | -1.8216  | 0.220699 | 3642012 |
| GAP4        | -1.82346 | 0.034008 | 3644463 |
| CR_00010C_A | -1.82426 | 0.03038  | 3639712 |
| C5_00160W_A | -1.82593 | 0.04437  | 3647871 |
| C3_04690C_A | -1.826   | 0.18045  | 3635196 |
| ZSF1        | -1.82668 | 0.010392 | 3641257 |
| HEX3        | -1.82681 | 0.01198  | 3635776 |
| C1_11720W_A | -1.82696 | 0.3411   | 3645319 |

|             |          |          |          |
|-------------|----------|----------|----------|
| C2_08660C_A | -1.82765 | 0.336339 | 3643907  |
| C5_04010C_A | -1.82772 | 0.335569 | 3647439  |
| CDC39       | -1.82778 | 0.01486  | 3646278  |
| CTA9        | -1.83141 | 0.015723 | 3640215  |
| FGR15       | -1.83162 | 0.030344 | 3638882  |
| C2_08910C_A | -1.83303 | 0.018637 | 3645798  |
| C4_06370C_A | -1.83436 | 0.101718 | 3642824  |
| UTP8        | -1.83463 | 0.010423 | 3640547  |
| RSP5        | -1.83683 | 0.003922 | 3643898  |
| SOU2        | -1.83743 | 0.449202 | 3642823  |
| C1_05150C_A | -1.83762 | 0.460693 | 3642469  |
| C5_00310C_A | -1.83909 | 0.025885 | 3641576  |
| C3_06290W_A | -1.83946 | 0.022465 | 3642237  |
| C5_00130C_A | -1.84021 | 0.020842 | 3647881  |
| BUD2        | -1.84076 | 0.036685 | 3641541  |
| TFG1        | -1.84279 | 0.011378 | 3635645  |
| NAN1        | -1.84279 | 0.009748 | 3637932  |
| C1_14180W_A | -1.8437  | 0.218642 | 3643324  |
| CR_00220W_A | -1.84434 | 0.09453  | 3639699  |
| FCA1        | -1.84465 | 0.016447 | 30515327 |
| C1_13330C_A | -1.8461  | 0.03002  | 3636150  |
| RPA34       | -1.84644 | 0.058913 | 3634883  |
| C1_02450C_A | -1.84674 | 0.061517 | 3636849  |
| C1_12570C_A | -1.84754 | 0.013213 | 3647604  |
| PAM16       | -1.84756 | 0.033601 | 3643321  |
| C7_02660C_A | -1.84924 | 0.193809 | 3647652  |
| C2_09510C_A | -1.85052 | 0.021188 | 3643816  |
| CR_04820W_A | -1.85292 | 0.039655 | 3647298  |
| PGA18       | -1.8538  | 0.040466 | 3638394  |
| C1_05120W_A | -1.85403 | 0.024139 | 3647667  |
| RPB7        | -1.85616 | 0.100248 | 3640221  |
| C2_00270C_A | -1.85944 | 0.053304 | 3638803  |
| C4_04250W_A | -1.86052 | 0.262685 | 3646855  |
| C4_06850C_A | -1.86072 | 0.032379 | 3642912  |
| HEM1        | -1.86108 | 0.009883 | 3640149  |
| CSC25       | -1.86124 | 0.025243 | 3645660  |
| RPO41       | -1.86262 | 0.023537 | 3639378  |
| C7_01660C_A | -1.86343 | 0.028105 | 3636983  |
| C4_02450W_A | -1.86369 | 0.147995 | 3637845  |
| TSR1        | -1.86431 | 0.007327 | 3642135  |
| C3_05900W_A | -1.86478 | 0.020931 | 3641739  |
| KNS1        | -1.86487 | 0.022577 | 3636228  |
| C4_06130W_A | -1.86659 | 0.059044 | 3648085  |
| C1_06320W_A | -1.867   | 0.199931 | 3648118  |
| C4_06990W_A | -1.87164 | 0.04013  | 3642968  |
| CR_00430C_A | -1.87203 | 0.140676 | 30515366 |
| RLM1        | -1.87241 | 0.057639 | 3635703  |

|             |          |          |          |
|-------------|----------|----------|----------|
| PFK2        | -1.87624 | 0.018598 | 3637056  |
| C1_10970W_A | -1.87641 | 0.01683  | 3644427  |
| C6_04290W_A | -1.87659 | 0.006546 | 3646280  |
| C1_09330W_A | -1.877   | 0.09448  | 3634802  |
| C3_02670W_A | -1.88157 | 0.09504  | 3638405  |
| C4_00860C_A | -1.88353 | 0.133949 | 3635717  |
| CR_05150W_A | -1.88451 | 0.20918  | 30515403 |
| C6_01040C_A | -1.88481 | 0.011014 | 3644014  |
| C3_03770C_A | -1.88524 | 0.010269 | 3645636  |
| CSP2        | -1.88599 | 0.208761 | 3645749  |
| C1_04960C_A | -1.88646 | 0.010957 | 3647527  |
| C1_10840C_A | -1.88673 | 0.003154 | 3644452  |
| C3_07900C_A | -1.88676 | 0.036837 | 3647450  |
| C4_01230C_A | -1.88739 | 0.055257 | 3635706  |
| C3_04330C_A | -1.8876  | 0.02416  | 3635272  |
| C4_01090C_A | -1.88783 | 0.193368 | 3635685  |
| C3_07800C_A | -1.88889 | 0.041912 | 3647461  |
| C7_02530C_A | -1.88891 | 0.06357  | 3636940  |
| UTP18       | -1.88929 | 0.00855  | 3643123  |
| C2_00510W_A | -1.89001 | 0.233048 | 3638868  |
| MET10       | -1.89319 | 0.007546 | 3644088  |
| C1_12680W_A | -1.89452 | 0.007506 | 3646833  |
| C2_00230W_A | -1.89603 | 0.034948 | 3638901  |
| CR_00600C_A | -1.89643 | 0.018994 | 3639660  |
| CR_00110W_A | -1.89818 | 0.008417 | 3639731  |
| C3_03110W_A | -1.90098 | 0.083977 | 3638400  |
| C3_06440W_A | -1.90183 | 0.011201 | 3642281  |
| C4_04810C_A | -1.90361 | 0.012752 | 3641112  |
| C1_11880W_A | -1.90638 | 0.046619 | 3642007  |
| C5_03940C_A | -1.90667 | 0.03016  | 3647446  |
| CR_09340W_A | -1.9076  | 0.018804 | 3641900  |
| C3_06240C_A | -1.90996 | 0.243947 | 30515213 |
| DAL4        | -1.9112  | 0.444474 | 3638422  |
| C3_01340W_A | -1.91285 | 0.348508 | 3636650  |
| C4_02700W_A | -1.91362 | 0.036628 | 3637859  |
| C1_01850C_A | -1.91597 | 0.018134 | 3645431  |
| FRP5        | -1.91628 | 0.462739 | 3641600  |
| C4_03200C_A | -1.9171  | 0.04499  | 3637837  |
| C7_03620C_A | -1.91827 | 0.019431 | 3646242  |
| C3_04260W_A | -1.91957 | 0.016456 | 3635140  |
| PCL7        | -1.91963 | 0.004913 | 3639491  |
| SWD1        | -1.9199  | 0.048179 | 3640535  |
| C7_02120C_A | -1.92009 | 0.057757 | 3637019  |
| KRE6        | -1.92128 | 0.012417 | 3641756  |
| CNH1        | -1.92177 | 0.009276 | 3648056  |
| FEN1        | -1.9238  | 0.024596 | 3646829  |
| C4_03740W_A | -1.92692 | 0.007925 | 3645357  |

|             |          |          |          |
|-------------|----------|----------|----------|
| CR_08200C_A | -1.92854 | 0.003799 | 3642087  |
| C3_02260C_A | -1.93011 | 0.00441  | 3636636  |
| MED19       | -1.93373 | 0.075779 | 30515334 |
| C1_10410W_A | -1.93559 | 0.209621 | 3634840  |
| SCT1        | -1.9364  | 0.009027 | 3648346  |
| C7_03890C_A | -1.93878 | 0.010843 | 3643108  |
| C3_07920W_A | -1.93981 | 0.011786 | 30515226 |
| TES15       | -1.94027 | 0.132365 | 3647478  |
| C4_07210W_A | -1.94127 | 0.02576  | 3642959  |
| C7_00300W_A | -1.94203 | 0.028788 | 3638046  |
| CR_03640C_A | -1.94241 | 0.014216 | 3643190  |
| CKA2        | -1.94276 | 0.017564 | 3643444  |
| PEX13       | -1.94567 | 0.006062 | 3641877  |
| SMX4        | -1.94645 | 0.122581 | 30515427 |
| EHD3        | -1.9485  | 0.054513 | 3636858  |
| SNF2        | -1.94892 | 0.012855 | 3635855  |
| C4_06420W_A | -1.94973 | 0.005284 | 3642795  |
| HRK1        | -1.95422 | 0.0101   | 3640586  |
| C1_04370C_A | -1.95433 | 0.012825 | 3647994  |
| C2_07720C_A | -1.95458 | 0.035029 | 3642304  |
| C7_00190W_A | -1.95552 | 0.100794 | 3637969  |
| CR_01640C_A | -1.95717 | 0.295732 | 3640086  |
| C3_00160C_A | -1.96162 | 0.005704 | 3640591  |
| YKE2        | -1.96183 | 0.023706 | 30515454 |
| WAL1        | -1.96279 | 0.006678 | 3647093  |
| LSM6        | -1.96384 | 0.06898  | 30515363 |
| CR_08290W_A | -1.96409 | 0.020605 | 3642103  |
| C1_09300C_A | -1.96543 | 0.470523 | 3634831  |
| RIM15       | -1.96643 | 0.00682  | 3637961  |
| HGC1        | -1.96835 | 0.124331 | 3639349  |
| C2_09340W_A | -1.96859 | 0.724572 | 3644107  |
| C1_13600W_A | -1.96859 | 0.724572 | 3636210  |
| C1_12040W_A | -1.96859 | 0.724572 | 3642029  |
| C1_09500W_A | -1.96859 | 0.724572 | 3634764  |
| C1_06220C_A | -1.96859 | 0.724572 | 3647518  |
| CR_01220W_A | -1.96859 | 0.724572 | 3640406  |
| KRE62       | -1.96859 | 0.724572 | 3641543  |
| C6_04070C_A | -1.96859 | 0.724572 | 3647826  |
| C2_10150W_A | -1.96859 | 0.724572 | 3643933  |
| PGA28       | -1.96859 | 0.724572 | 3641350  |
| FGR37       | -1.96859 | 0.724572 | 3641609  |
| C4_05580C_A | -1.96859 | 0.724572 | 3641775  |
| C4_03500C_A | -1.96859 | 0.724572 | 3646801  |
| C3_03620C_A | -1.96859 | 0.724572 | 3645654  |
| C1_03470C_A | -1.9688  | 0.724534 | 3636912  |
| C2_02140C_A | -1.9688  | 0.724534 | 3635748  |
| C1_05970W_A | -1.9688  | 0.724534 | 3639874  |

|             |          |          |          |
|-------------|----------|----------|----------|
| C2_01460C_A | -1.9688  | 0.724534 | 3635844  |
| C1_12090C_A | -1.9688  | 0.724534 | 3642056  |
| C2_08150W_A | -1.9688  | 0.724534 | 3642328  |
| C1_09700W_A | -1.9688  | 0.724534 | 3634876  |
| C4_00990W_A | -1.9688  | 0.724534 | 3635609  |
| CR_08260C_A | -1.9688  | 0.724534 | 3642100  |
| C4_02240C_A | -1.9688  | 0.724534 | 3635692  |
| CR_04980C_A | -1.9688  | 0.724534 | 3646395  |
| C5_03770C_A | -1.9688  | 0.724534 | 3647233  |
| C4_03760W_A | -1.9688  | 0.724534 | 3645355  |
| YCF1        | -1.96881 | 0.011554 | 3636934  |
| C5_03300C_A | -1.96947 | 0.028158 | 3646357  |
| TRM12       | -1.9701  | 0.031648 | 3641738  |
| C2_09870W_A | -1.97188 | 0.03487  | 3643780  |
| C6_03910C_A | -1.97222 | 0.084642 | 3640263  |
| C2_10680W_A | -1.97394 | 0.015815 | 3641252  |
| HGT2        | -1.97688 | 0.024954 | 3644579  |
| IFF11       | -1.97908 | 0.552975 | 3640580  |
| NAT4        | -1.98008 | 0.034149 | 3635704  |
| C2_07370W_A | -1.98249 | 0.02728  | 3645233  |
| C5_03210C_A | -1.98449 | 0.255699 | 3646364  |
| C2_05490W_A | -1.98498 | 0.241403 | 3643417  |
| C7_03230C_A | -1.98503 | 0.255895 | 3641369  |
| TFB3        | -1.98507 | 0.023488 | 3644115  |
| SFT1        | -1.98663 | 0.077804 | 30515372 |
| CR_07480W_A | -1.99203 | 0.00426  | 3646047  |
| GLN3        | -1.99213 | 0.003732 | 3636453  |
| C7_01210C_A | -1.99477 | 0.005759 | 3645904  |
| VID27       | -1.99541 | 0.003217 | 3647894  |
| GAP5        | -1.99723 | 0.004119 | 3646954  |
| C6_02230W_A | -1.99723 | 0.0041   | 3645866  |
| C2_00220C_A | -1.99825 | 0.005486 | 3638902  |
| C3_04410C_A | -2.00149 | 0.004855 | 3635178  |
| C1_06660W_A | -2.00203 | 0.012379 | 3639542  |
| C5_01290C_A | -2.0039  | 0.003701 | 3642647  |
| C1_01590C_A | -2.00593 | 0.004717 | 3640223  |
| SAP9        | -2.00691 | 0.006509 | 3645625  |
| C1_11930W_A | -2.00768 | 0.003847 | 3642002  |
| C2_08020C_A | -2.00845 | 0.012185 | 3642308  |
| EXO70       | -2.01142 | 0.005289 | 3636948  |
| SOG2        | -2.01159 | 0.004354 | 3644475  |
| HRQ2        | -2.01194 | 0.029925 | 3647850  |
| DUS4        | -2.01806 | 0.005901 | 3641580  |
| CR_02670C_A | -2.01947 | 0.011872 | 3642572  |
| C3_04700W_A | -2.02096 | 0.025141 | 3635247  |
| C7_01280C_A | -2.02171 | 0.036379 | 3645909  |
| C1_10910C_A | -2.02224 | 0.022792 | 3644445  |

|             |          |          |         |
|-------------|----------|----------|---------|
| RSM22       | -2.02325 | 0.004975 | 3642506 |
| C7_01990C_A | -2.02427 | 0.017218 | 3636966 |
| MAK5        | -2.02453 | 0.007747 | 3643454 |
| MUP1        | -2.0259  | 0.013362 | 3642008 |
| CR_08400C_A | -2.02638 | 0.021667 | 3642115 |
| CR_03200C_A | -2.02644 | 0.003007 | 3645131 |
| PBP2        | -2.02724 | 0.00203  | 3640267 |
| C2_02520W_A | -2.02732 | 0.027523 | 3635818 |
| CTM1        | -2.02772 | 0.013876 | 3638951 |
| HST7        | -2.02816 | 0.009443 | 3640953 |
| C7_02450W_A | -2.02891 | 0.015745 | 3636972 |
| CDR2        | -2.03111 | 0.021471 | 3635265 |
| NOP13       | -2.03599 | 0.01204  | 3638469 |
| C3_02030W_A | -2.03616 | 0.022447 | 3636580 |
| RRS1        | -2.03777 | 0.00743  | 3639352 |
| KIN3        | -2.03844 | 0.003586 | 3641199 |
| C5_02440C_A | -2.03942 | 0.018329 | 3637728 |
| C4_03090W_A | -2.04475 | 0.015717 | 3637926 |
| C1_09840C_A | -2.04514 | 0.003061 | 3634848 |
| POP2        | -2.04564 | 0.006398 | 3640301 |
| FGR3        | -2.05082 | 0.003453 | 3641179 |
| TPS1        | -2.05217 | 0.005197 | 3646699 |
| C4_04670C_A | -2.0534  | 0.004332 | 3641140 |
| CAF16       | -2.05789 | 0.007482 | 3646486 |
| C4_05740C_A | -2.06224 | 0.003642 | 3641806 |
| MPP10       | -2.06305 | 0.005846 | 3647912 |
| C2_08960C_A | -2.06375 | 0.025359 | 3645787 |
| C3_07940W_A | -2.06408 | 0.011225 | 3647453 |
| CR_10410C_A | -2.0648  | 0.0105   | 3638957 |
| PHO86       | -2.06601 | 0.028114 | 3642323 |
| CR_06060W_A | -2.07491 | 0.018787 | 6335358 |
| C7_00200W_A | -2.07647 | 0.008461 | 3637968 |
| C4_00610W_A | -2.07755 | 0.007089 | 3645770 |
| GPM2        | -2.07839 | 0.012628 | 3644713 |
| C6_02720C_A | -2.07924 | 0.010673 | 3639212 |
| C2_05830C_A | -2.08218 | 0.007031 | 3647483 |
| C7_01040C_A | -2.08629 | 0.013188 | 3638018 |
| PFK1        | -2.0865  | 0.00693  | 3636448 |
| C7_02930C_A | -2.08811 | 0.005087 | 3641390 |
| SIR2        | -2.08973 | 0.01376  | 3638845 |
| C4_02090C_A | -2.09029 | 0.01218  | 3635642 |
| HCA4        | -2.09087 | 0.006823 | 3637911 |
| HPT1        | -2.09711 | 0.017277 | 3643034 |
| CR_09410W_A | -2.09875 | 0.027079 | 3641933 |
| PDE2        | -2.09975 | 0.00238  | 3636877 |
| C3_05860C_A | -2.1034  | 0.023892 | 3641759 |
| C2_02730W_A | -2.10419 | 0.001035 | 3643035 |



|             |          |          |          |
|-------------|----------|----------|----------|
| C4_01710C_A | -2.1045  | 0.000382 | 3635708  |
| TOM1        | -2.10483 | 0.00995  | 3642987  |
| MSN4        | -2.10508 | 0.005797 | 3634911  |
| ARD         | -2.10616 | 0.004188 | 3647906  |
| PSD1        | -2.10695 | 0.000321 | 3639382  |
| IFF9        | -2.10894 | 0.004688 | 3641008  |
| NUP49       | -2.11095 | 0.001046 | 3636173  |
| ADAEC       | -2.11307 | 0.008577 | 3637342  |
| BGL22       | -2.11531 | 0.020482 | 3641935  |
| C2_05550W_A | -2.11627 | 0.040876 | 3645560  |
| MAS1        | -2.11696 | 0.001242 | 3636855  |
| MBP1        | -2.11904 | 0.001946 | 3635281  |
| C3_06370C_A | -2.12001 | 0.004724 | 3642258  |
| C5_01560C_A | -2.12116 | 0.003924 | 3647064  |
| BUD5        | -2.12445 | 0.003755 | 3647315  |
| C5_04530W_A | -2.12758 | 0.007551 | 3636507  |
| SPT6        | -2.12804 | 0.007018 | 3643171  |
| CNT         | -2.1295  | 0.001613 | 3644071  |
| CR_10400W_A | -2.12968 | 0.001943 | 3638956  |
| RTG3        | -2.13026 | 0.011656 | 3644423  |
| C7_01400C_A | -2.13264 | 0.01123  | 3645893  |
| TBP1        | -2.13682 | 0.008026 | 3647675  |
| YFH1        | -2.14107 | 0.016041 | 3646853  |
| C5_01490C_A | -2.14191 | 0.001346 | 3647058  |
| OYE32       | -2.14337 | 0.045547 | 3642919  |
| HBR1        | -2.14416 | 0.001706 | 3639295  |
| HST2        | -2.1451  | 0.029256 | 3640162  |
| C1_01580W_A | -2.14515 | 0.005396 | 3640222  |
| DCP2        | -2.14569 | 0.001234 | 3642069  |
| C3_00100W_A | -2.14869 | 0.008312 | 3640567  |
| DIP2        | -2.15241 | 0.000507 | 3640762  |
| PTK2        | -2.15331 | 0.000387 | 3641611  |
| FMT1        | -2.15562 | 0.004602 | 3646530  |
| MET4        | -2.15736 | 0.002854 | 3641219  |
| C1_07130C_A | -2.16603 | 0.001167 | 3644462  |
| C1_10440W_A | -2.17416 | 0.002387 | 3647180  |
| C1_00460W_A | -2.17753 | 0.009102 | 3639316  |
| C2_02800W_A | -2.18019 | 0.028335 | 30515096 |
| C6_00360C_A | -2.1806  | 0.026689 | 3646083  |
| MTR2        | -2.18259 | 0.002861 | 30515167 |
| GRR1        | -2.18375 | 0.000655 | 3636392  |
| C3_07290W_A | -2.18418 | 0.000535 | 3638430  |
| NCS2        | -2.18439 | 0.004201 | 3643216  |
| CR_10280W_A | -2.18729 | 0.015808 | 3638934  |
| C4_00050W_A | -2.18887 | 0.006489 | 3648060  |
| C4_06660W_A | -2.19067 | 0.029888 | 3642809  |
| TCC1        | -2.19562 | 0.001644 | 3638524  |

|             |          |          |          |
|-------------|----------|----------|----------|
| C1_04590W_A | -2.1976  | 0.003979 | 30514987 |
| CR_00460C_A | -2.19804 | 0.010868 | 3639726  |
| POX1-3      | -2.20107 | 0.002987 | 3636598  |
| C2_06480W_A | -2.20147 | 0.003419 | 3646568  |
| CR_05770W_A | -2.20203 | 0.02977  | 3646694  |
| ZCF9        | -2.20528 | 0.006962 | 3638869  |
| RRP15       | -2.20542 | 0.005255 | 3648397  |
| GAL102      | -2.20563 | 0.008455 | 3644585  |
| C2_01680C_A | -2.20683 | 0.009509 | 3635744  |
| PEP12       | -2.20766 | 0.007301 | 3637737  |
| PRS5        | -2.20777 | 0.00057  | 3642296  |
| C6_01550C_A | -2.20797 | 0.01179  | 3641653  |
| C1_11000C_A | -2.20833 | 0.010304 | 3644422  |
| C1_04120C_A | -2.21033 | 0.041047 | 3644701  |
| C4_07220C_A | -2.21176 | 0.002595 | 3642955  |
| CCH1        | -2.21176 | 0.006414 | 3640175  |
| PTR3        | -2.2144  | 0.013475 | 3645428  |
| C5_02280C_A | -2.21566 | 0.000973 | 3637712  |
| WSC2        | -2.21937 | 0.003051 | 3639225  |
| C1_05270C_A | -2.22322 | 0.007307 | 3642476  |
| C4_03350C_A | -2.22531 | 0.002612 | 3646794  |
| IFH1        | -2.22886 | 0.00341  | 3637770  |
| TAF145      | -2.23056 | 0.002582 | 3639486  |
| FCR1        | -2.23074 | 0.001213 | 3638542  |
| C6_04550C_A | -2.23143 | 0.000392 | 3645976  |
| C1_06820W_A | -2.23208 | 0.001225 | 3639493  |
| CKS1        | -2.23631 | 0.004931 | 3647732  |
| C5_02590C_A | -2.24014 | 0.001639 | 3637723  |
| C4_02510W_A | -2.25182 | 0.005055 | 3637865  |
| DBP7        | -2.25551 | 0.001145 | 3645903  |
| RIO2        | -2.25554 | 0.000806 | 3642066  |
| C5_01530C_A | -2.25612 | 0.007122 | 3647062  |
| VPS20       | -2.25706 | 0.023993 | 3637427  |
| C2_00360C_A | -2.25931 | 0.000759 | 3638825  |
| C6_01340C_A | -2.26501 | 0.024099 | 30515331 |
| HMO1        | -2.26595 | 0.004853 | 3646685  |
| LIG4        | -2.26639 | 0.000435 | 3642986  |
| C1_11610C_A | -2.26762 | 0.001328 | 3645345  |
| CR_10730C_A | -2.26796 | 0.000918 | 3638998  |
| PEX12       | -2.26797 | 0.01138  | 3638862  |
| ENA2        | -2.27208 | 0.001582 | 3639291  |
| GSY1        | -2.27348 | 0.002784 | 3640435  |
| C2_02960C_A | -2.27624 | 0.009592 | 3643011  |
| C2_06660W_A | -2.27624 | 0.015157 | 3648418  |
| PTP1        | -2.2773  | 0.003892 | 3642093  |
| ISA1        | -2.27882 | 0.001327 | 3639174  |
| C4_02110W_A | -2.27891 | 0.004852 | 3635673  |

|             |          |          |         |
|-------------|----------|----------|---------|
| CR_02420W_A | -2.27977 | 0.001195 | 3644926 |
| KOG1        | -2.28042 | 0.000425 | 3642488 |
| C7_04090C_A | -2.28321 | 0.004212 | 3643135 |
| ATO2        | -2.28343 | 0.0068   | 3639845 |
| C1_01840C_A | -2.28746 | 0.006536 | 3645432 |
| BRO1        | -2.28884 | 0.003481 | 3636590 |
| SHA3        | -2.29057 | 0.001917 | 3644580 |
| C7_01020C_A | -2.29168 | 0.00354  | 3638020 |
| HSM3        | -2.294   | 0.00395  | 3646713 |
| CNS1        | -2.29604 | 0.001414 | 3639365 |
| C2_08330W_A | -2.29729 | 0.004605 | 3648166 |
| C6_00850W_A | -2.30229 | 0.003295 | 3644010 |
| C1_11730W_A | -2.30238 | 0.001451 | 3645318 |
| PSO2        | -2.30341 | 0.045837 | 3641241 |
| C1_13530W_A | -2.30426 | 0.000653 | 3636170 |
| C7_03760W_A | -2.30585 | 0.011576 | 3647865 |
| DAL9        | -2.30681 | 0.013014 | 3645653 |
| C1_06650W_A | -2.30826 | 0.003461 | 3639543 |
| SDH1        | -2.3089  | 0.001285 | 3642477 |
| C3_07550C_A | -2.31162 | 0.000765 | 3638525 |
| C2_00420W_A | -2.31216 | 0.003148 | 3638819 |
| C1_14380C_A | -2.31322 | 0.003649 | 3643285 |
| C1_09710C_A | -2.31364 | 0.001585 | 3634818 |
| YAH1        | -2.31544 | 0.00895  | 3638368 |
| C5_03920C_A | -2.31918 | 0.005548 | 3647448 |
| C4_04190C_A | -2.32496 | 0.239354 | 3646860 |
| ORM1        | -2.32556 | 0.003143 | 3640307 |
| C3_03670W_A | -2.32608 | 0.000412 | 3645649 |
| C3_00570C_A | -2.32774 | 0.000376 | 3640584 |
| C5_05340W_A | -2.32804 | 8.21E-05 | 3636400 |
| SEF1        | -2.32849 | 0.000758 | 3644945 |
| RMS1        | -2.3304  | 0.001325 | 3646361 |
| CR_09100C_A | -2.33388 | 0.048215 | 3641928 |
| C3_07280C_A | -2.33491 | 0.003018 | 3638431 |
| C2_09240C_A | -2.33525 | 0.021044 | 3644064 |
| CAP1        | -2.33648 | 2.68E-05 | 3636640 |
| CR_07940W_A | -2.34169 | 0.012364 | 3644139 |
| SMI1        | -2.34211 | 0.003817 | 3640741 |
| C4_04350W_A | -2.3478  | 0.003445 | 3646852 |
| URK1        | -2.35439 | 0.001588 | 3635186 |
| PSA2        | -2.3593  | 0.001645 | 3636159 |
| POT1-2      | -2.35979 | 0.059592 | 3638908 |
| OPY2        | -2.36119 | 0.000341 | 3640765 |
| C2_02770W_A | -2.36453 | 0.000207 | 3643031 |
| C1_02850W_A | -2.36482 | 0.00089  | 3636862 |
| MAK16       | -2.36949 | 0.001481 | 3646920 |
| C5_03510C_A | -2.37061 | 0.004204 | 3646969 |

|             |          |          |          |
|-------------|----------|----------|----------|
| UCF1        | -2.37137 | 0.001579 | 3648170  |
| C4_00490W_A | -2.37201 | 0.001027 | 3645013  |
| SSU72       | -2.37902 | 0.000944 | 3645129  |
| C3_03190C_A | -2.37966 | 0.004631 | 3638427  |
| C3_05430W_A | -2.38648 | 0.004257 | 3643667  |
| CR_04280C_A | -2.39062 | 0.025065 | 3640993  |
| CR_07670W_A | -2.39259 | 0.004826 | 3647255  |
| RRN11       | -2.39546 | 0.001292 | 3645276  |
| C3_04790W_A | -2.39798 | 0.010136 | 3635215  |
| C2_09790W_A | -2.4024  | 0.003325 | 3643804  |
| C2_00090W_A | -2.40328 | 0.0129   | 3647910  |
| ISU1        | -2.40998 | 0.000384 | 3637007  |
| SIS1        | -2.41028 | 0.000222 | 3644841  |
| C1_04720W_A | -2.41328 | 0.003777 | 30514988 |
| C2_09500W_A | -2.41328 | 0.003566 | 3643817  |
| RIM9        | -2.41663 | 0.015716 | 3644047  |
| C4_04510W_A | -2.4167  | 0.000784 | 3641120  |
| C3_05440C_A | -2.41697 | 0.014637 | 3643668  |
| VPS70       | -2.42406 | 0.002278 | 3637971  |
| C4_07100C_A | -2.4249  | 0.000108 | 3642903  |
| CR_02030C_A | -2.43221 | 0.000466 | 3640152  |
| NAR1        | -2.43334 | 0.001315 | 3634916  |
| ZCF35       | -2.43543 | 0.00203  | 3641740  |
| ESA1        | -2.43545 | 9.86E-05 | 3640518  |
| ASH1        | -2.43682 | 0.003317 | 3641249  |
| CR_10470C_A | -2.43781 | 0.000102 | 3638979  |
| C5_00800C_A | -2.43992 | 0.000204 | 3644126  |
| SEH1        | -2.44029 | 0.000344 | 3642290  |
| PRN3        | -2.44312 | 0.046672 | 3639878  |
| REI1        | -2.45118 | 0.000562 | 3647536  |
| LAS1        | -2.45123 | 0.000278 | 3644073  |
| REP1        | -2.45139 | 0.038682 | 3639708  |
| C4_00810C_A | -2.4522  | 0.00935  | 3645742  |
| C3_06160C_A | -2.45821 | 0.003027 | 3641766  |
| C2_01310W_A | -2.4611  | 0.002319 | 3638788  |
| C7_00030W_A | -2.4631  | 0.000552 | 3638004  |
| LEU42       | -2.46366 | 0.001516 | 3643808  |
| IFM3        | -2.46388 | 0.008101 | 3642335  |
| C1_11690W_A | -2.46841 | 0.000381 | 3645322  |
| RPM2        | -2.46929 | 8.91E-05 | 3644790  |
| PSP1        | -2.47014 | 0.000298 | 3644551  |
| C2_08390W_A | -2.47106 | 0.005873 | 3648252  |
| NSA2        | -2.47131 | 0.000255 | 3642259  |
| UBC8        | -2.47465 | 0.002715 | 3645433  |
| STE4        | -2.47481 | 0.029333 | 3637358  |
| C3_07070C_A | -2.4754  | 0.002331 | 3638446  |
| FAL1        | -2.47613 | 0.000239 | 3639839  |

|             |          |          |          |
|-------------|----------|----------|----------|
| SAS10       | -2.47698 | 0.001364 | 3637899  |
| RGD3        | -2.48354 | 9.06E-06 | 3648003  |
| C1_13430C_A | -2.48398 | 0.030236 | 3636223  |
| PEX4        | -2.48419 | 0.00384  | 3636429  |
| C2_04770W_A | -2.49093 | 0.012023 | 3647783  |
| RPA12       | -2.49177 | 0.027209 | 3643477  |
| C3_00130C_A | -2.49251 | 1.48E-05 | 3640593  |
| CKA1        | -2.49276 | 0.000144 | 3639018  |
| CWT1        | -2.49352 | 0.000287 | 3647595  |
| CR_05910W_A | -2.4936  | 0.003061 | 3646680  |
| C6_04480C_A | -2.49371 | 0.000183 | 3645986  |
| CR_10760C_A | -2.49544 | 0.018707 | 3638943  |
| C7_03240W_A | -2.49574 | 0.003904 | 3641368  |
| RNR3        | -2.49631 | 0.001793 | 3647591  |
| ACH1        | -2.49908 | 0.003117 | 3643773  |
| C7_02550C_A | -2.50027 | 0.003268 | 3637018  |
| CR_03480W_A | -2.50061 | 0.117135 | 3643199  |
| C2_09660W_A | -2.50394 | 0.003043 | 3643793  |
| C1_01070C_A | -2.51388 | 0.031819 | 3640172  |
| BLM3        | -2.514   | 1.67E-05 | 3642310  |
| C3_04620C_A | -2.51541 | 0.011143 | 3635155  |
| C5_05360C_A | -2.51693 | 0.003066 | 3636402  |
| C5_02190C_A | -2.51818 | 0.0007   | 30515303 |
| HSX11       | -2.52129 | 0.04105  | 3635660  |
| FHL1        | -2.52316 | 0.000649 | 3643493  |
| CR_09440C_A | -2.52343 | 8.57E-05 | 3641937  |
| C1_06750W_A | -2.52408 | 0.02268  | 3639506  |
| CR_10770W_A | -2.52427 | 0.003679 | 3638944  |
| C1_00580W_A | -2.53161 | 0.010171 | 3639361  |
| C3_00630W_A | -2.53429 | 0.000303 | 3640576  |
| C5_03260C_A | -2.5384  | 0.001447 | 3646360  |
| C6_03210C_A | -2.53851 | 0.004916 | 3639178  |
| C4_03370C_A | -2.54011 | 0.027376 | 3646796  |
| CR_02970C_A | -2.54041 | 6.89E-05 | 3642603  |
| C3_04540C_A | -2.54355 | 0.000619 | 3635262  |
| FRE10       | -2.54414 | 0.005541 | 3646841  |
| HAL9        | -2.54634 | 0.000338 | 3643757  |
| C2_02270C_A | -2.54829 | 0.002565 | 3635805  |
| SHY1        | -2.54972 | 7.96E-05 | 3634824  |
| FRE3        | -2.54974 | 0.035721 | 3641789  |
| MAF1        | -2.551   | 0.000435 | 3642332  |
| BBC1        | -2.5519  | 0.000433 | 3646661  |
| C5_03030W_A | -2.55526 | 0.017486 | 3637822  |
| C6_03780C_A | -2.57089 | 0.001154 | 3640308  |
| TAZ1        | -2.57147 | 0.006144 | 3644108  |
| EFG1        | -2.57234 | 0.00017  | 3644145  |
| SAM35       | -2.57428 | 0.000656 | 3643329  |

|             |          |          |          |
|-------------|----------|----------|----------|
| CR_06650C_A | -2.5743  | 0.037205 | 3646620  |
| CR_06970C_A | -2.58775 | 0.000768 | 3645736  |
| SVF1        | -2.59083 | 0.001308 | 3639289  |
| C3_05790C_A | -2.59169 | 0.032368 | 3641753  |
| C6_02650C_A | -2.59864 | 0.000838 | 3639223  |
| CR_00630W_A | -2.59873 | 0.001158 | 3639690  |
| HMS1        | -2.59968 | 1.75E-05 | 3641570  |
| C3_03300C_A | -2.59977 | 2.99E-05 | 3638361  |
| ELP3        | -2.60176 | 2.67E-05 | 3641747  |
| CR_07190W_A | -2.60306 | 0.000193 | 3645269  |
| CEF1        | -2.60394 | 0.000722 | 3634808  |
| LEU3        | -2.60683 | 3.65E-05 | 3637757  |
| ZCF29       | -2.60722 | 0.000191 | 3641370  |
| C6_04140C_A | -2.60835 | 0.000183 | 3647970  |
| TSM1        | -2.60844 | 0.001657 | 3645953  |
| C2_09570C_A | -2.6091  | 0.032281 | 3643811  |
| C4_02920W_A | -2.61177 | 6.83E-05 | 3637878  |
| C1_08630W_A | -2.61208 | 8.41E-05 | 3634928  |
| TBF1        | -2.61257 | 6.85E-05 | 3637327  |
| C2_10600W_A | -2.61387 | 0.000791 | 3641245  |
| BUD22       | -2.61389 | 0.000167 | 3640391  |
| NOP4        | -2.61749 | 7.82E-06 | 3647991  |
| C2_06090W_A | -2.62393 | 0.000341 | 3644097  |
| C2_04520C_A | -2.62612 | 0.037118 | 3645447  |
| C1_03310W_A | -2.62871 | 0.00021  | 3636856  |
| DCK2        | -2.62964 | 0.01448  | 3637384  |
| OYE2        | -2.63297 | 0.000258 | 3641603  |
| C6_02290C_A | -2.63317 | 6.54E-05 | 3645873  |
| SMM1        | -2.64078 | 0.000283 | 3643778  |
| C1_06760C_A | -2.64207 | 5.05E-05 | 3639505  |
| C4_03960W_A | -2.6428  | 0.000691 | 30515264 |
| GNP1        | -2.6485  | 0.000169 | 3646073  |
| LTV1        | -2.65115 | 0.000131 | 3639016  |
| GDH2        | -2.65399 | 0.000287 | 3642295  |
| C3_02420C_A | -2.65734 | 0.001947 | 3638342  |
| C1_01460W_A | -2.65768 | 0.000236 | 3640240  |
| C3_07680W_A | -2.65899 | 5.79E-05 | 3638459  |
| PTR22       | -2.65988 | 0.000705 | 3645634  |
| C2_00490W_A | -2.66072 | 0.000204 | 3638870  |
| C3_00500C_A | -2.66382 | 0.001027 | 3640515  |
| NOT5        | -2.66576 | 9.58E-05 | 3640763  |
| CST5        | -2.67042 | 0.006033 | 3645981  |
| RAD1        | -2.67243 | 0.000161 | 3641192  |
| C1_04220C_A | -2.67738 | 0.001768 | 3644721  |
| C2_03500W_A | -2.67994 | 2.87E-06 | 3637345  |
| KTI11       | -2.68087 | 0.039913 | 30515125 |
| SST2        | -2.68091 | 0.022545 | 3637754  |

|             |          |          |         |
|-------------|----------|----------|---------|
| GCS1        | -2.68131 | 0.000169 | 3640742 |
| BUD21       | -2.68163 | 6.27E-05 | 3640541 |
| C6_04470C_A | -2.68355 | 1.86E-05 | 3645985 |
| NAG3        | -2.68385 | 0.00124  | 3645969 |
| SIZ1        | -2.68419 | 1.48E-06 | 3640219 |
| C4_00680W_A | -2.6842  | 0.000388 | 3645753 |
| C6_04410C_A | -2.68437 | 0.005758 | 3645950 |
| EXM2        | -2.68498 | 0.001897 | 3642929 |
| ZCF27       | -2.68524 | 3.56E-05 | 3635631 |
| SFP1        | -2.68764 | 1.34E-05 | 3635225 |
| C1_10710C_A | -2.69347 | 0.028771 | 3644407 |
| C1_02960C_A | -2.69393 | 5.52E-05 | 3636834 |
| YWP1        | -2.695   | 0.005442 | 3643915 |
| C3_07650C_A | -2.6959  | 0.004132 | 3638488 |
| IRE1        | -2.69871 | 2.3E-05  | 3640726 |
| AHR1        | -2.69914 | 4.88E-05 | 3641733 |
| HOL4        | -2.70047 | 7.35E-06 | 3645409 |
| ULP2        | -2.70128 | 0.002261 | 3643196 |
| C2_05750W_A | -2.70289 | 0.000178 | 3645577 |
| C2_02820C_A | -2.70522 | 0.000223 | 3643027 |
| SSN6        | -2.70973 | 0.000343 | 3638518 |
| BOI2        | -2.70989 | 0.000104 | 3640404 |
| GAL10       | -2.71177 | 0.000238 | 3644583 |
| C4_01420W_A | -2.71444 | 0.001342 | 3635626 |
| C4_06620C_A | -2.71506 | 0.047354 | 3642813 |
| GNP3        | -2.71689 | 0.001527 | 3639027 |
| TPO4        | -2.71812 | 0.000371 | 3640956 |
| C2_00740C_A | -2.71972 | 2.82E-05 | 3638912 |
| FAB1        | -2.72036 | 0.000478 | 3635766 |
| C7_03500W_A | -2.72317 | 0.001565 | 3646246 |
| HSE1        | -2.72948 | 1.81E-05 | 3640407 |
| C2_07430C_A | -2.73071 | 0.001014 | 3645201 |
| C1_12370W_A | -2.7323  | 0.002972 | 3642061 |
| OPT8        | -2.73237 | 0.000137 | 3640266 |
| C3_02900W_A | -2.73702 | 0.00542  | 3638337 |
| RPF1        | -2.73724 | 4.42E-05 | 3637890 |
| CR_02960W_A | -2.7394  | 0.036113 | 3642591 |
| CR_03910C_A | -2.7401  | 7.84E-05 | 3640954 |
| C6_02150C_A | -2.74337 | 0.016329 | 3645888 |
| ARO80       | -2.74689 | 0.002019 | 3636808 |
| CR_10040W_A | -2.74925 | 0.003812 | 3639034 |
| UPC2        | -2.75338 | 1.26E-05 | 3646489 |
| C3_02910W_A | -2.75523 | 0.013889 | 3638378 |
| WOR2        | -2.75548 | 0.000597 | 3635230 |
| CR_00160C_A | -2.76429 | 0.000777 | 3639706 |
| C1_07660W_A | -2.77466 | 0.00265  | 3646656 |
| C1_08770W_A | -2.77545 | 0.000955 | 3634788 |

|             |          |          |          |
|-------------|----------|----------|----------|
| C7_00330C_A | -2.77562 | 7.97E-05 | 3638042  |
| PMA1        | -2.78255 | 1.04E-05 | 3640531  |
| C5_00780C_A | -2.78364 | 6.62E-05 | 3644124  |
| C1_03450C_A | -2.7842  | 7.55E-05 | 3636910  |
| C2_03550C_A | -2.78465 | 9.48E-05 | 3637338  |
| C7_02160W_A | -2.78808 | 0.000562 | 3636994  |
| MET2        | -2.79232 | 1.63E-06 | 3640070  |
| C7_03380W_A | -2.79402 | 0.00104  | 30515359 |
| CR_08420W_A | -2.80093 | 1.1E-05  | 3642117  |
| C3_07430W_A | -2.81192 | 1.01E-05 | 3638484  |
| GPT1        | -2.8122  | 0.041247 | 3647671  |
| C7_00040C_A | -2.81729 | 0.006256 | 3638002  |
| C2_00410C_A | -2.81974 | 2.78E-06 | 3638820  |
| C3_07400W_A | -2.82172 | 0.000621 | 3638471  |
| PPR1        | -2.82715 | 0.000348 | 3636535  |
| SOF1        | -2.82721 | 4.16E-05 | 3640585  |
| CR_04110W_A | -2.83237 | 0.000476 | 3641026  |
| SPL1        | -2.83746 | 3.3E-05  | 3638035  |
| C1_12860C_A | -2.8411  | 0.017022 | 3636179  |
| C1_02210W_A | -2.84805 | 0.000167 | 3644594  |
| C2_07060W_A | -2.85757 | 0.000477 | 3643500  |
| CTR1        | -2.86056 | 0.000338 | 3647077  |
| MUC1        | -2.86726 | 4.82E-06 | 3645771  |
| C7_01610W_A | -2.86775 | 0.002001 | 30515353 |
| CR_01630C_A | -2.86833 | 0.034728 | 3640085  |
| MSB2        | -2.87722 | 4.93E-07 | 3635830  |
| C5_04180W_A | -2.88729 | 0.014631 | 3636544  |
| DUR32       | -2.89019 | 0.010434 | 3636142  |
| CR_03410W_A | -2.89027 | 0.000966 | 3645136  |
| C3_03740W_A | -2.89318 | 0.020356 | 3645640  |
| OFR1        | -2.8986  | 0.001538 | 3640710  |
| C4_05440C_A | -2.89881 | 4.42E-06 | 3646960  |
| CR_07920W_A | -2.90114 | 1.15E-05 | 3644141  |
| UTP9        | -2.90381 | 3.88E-06 | 3638451  |
| C6_04240W_A | -2.907   | 0.009237 | 3646276  |
| C6_04510C_A | -2.91476 | 0.000146 | 3645955  |
| DFI1        | -2.92448 | 1.45E-05 | 3638038  |
| CCE1        | -2.92621 | 0.047839 | 3640395  |
| C1_13130C_A | -2.92671 | 6.39E-06 | 3636202  |
| MDN1        | -2.93423 | 0.000209 | 3635614  |
| RFX1        | -2.93478 | 0.000956 | 3644844  |
| C1_11080W_A | -2.93547 | 7.5E-06  | 3644416  |
| C3_06270C_A | -2.93553 | 0.000295 | 3642239  |
| CR_10420W_A | -2.9374  | 4.45E-06 | 3638974  |
| C7_01510W_A | -2.94561 | 3.07E-05 | 3637049  |
| ATS1        | -2.94667 | 5.91E-05 | 3642079  |
| C2_00640W_A | -2.95039 | 0.001128 | 3638847  |



|             |          |          |          |
|-------------|----------|----------|----------|
| C1_13390W_A | -2.95819 | 0.003727 | 3636218  |
| C3_06420C_A | -2.95845 | 6.44E-05 | 3642262  |
| C3_01090W_A | -2.96035 | 0.004311 | 30515176 |
| C1_07810C_A | -2.96054 | 0.00402  | 3640708  |
| CPH2        | -2.96079 | 5.32E-05 | 3646067  |
| CR_09800C_A | -2.96237 | 5.41E-07 | 3638984  |
| CR_02100C_A | -2.96536 | 0.001284 | 3640141  |
| SBA1        | -2.9697  | 4.34E-06 | 3640305  |
| C4_01960C_A | -2.973   | 3.65E-06 | 3635664  |
| C5_02580W_A | -2.97582 | 0.000476 | 3637721  |
| C4_01860C_A | -2.9782  | 0.000248 | 3635590  |
| C2_08530C_A | -2.98337 | 0.001414 | 3643921  |
| C2_09000C_A | -2.98856 | 0.023147 | 3645782  |
| C5_04120C_A | -2.99948 | 9.24E-05 | 3636522  |
| C2_00650W_A | -3.00008 | 3.34E-05 | 3638889  |
| RNR22       | -3.0021  | 2.4E-05  | 3645217  |
| BUD14       | -3.00389 | 1.4E-06  | 3643469  |
| C1_12580W_A | -3.00455 | 3.88E-05 | 3647603  |
| RPN4        | -3.00929 | 1.81E-05 | 3644684  |
| CR_08040W_A | -3.01008 | 3.21E-05 | 3644135  |
| BNA4        | -3.01472 | 1.07E-06 | 3640528  |
| STD1        | -3.01568 | 5.46E-05 | 3647459  |
| MNN4        | -3.02017 | 6.49E-06 | 3642784  |
| PRP5        | -3.02495 | 9.5E-07  | 3638447  |
| CR_06980W_A | -3.02599 | 0.011727 | 3645735  |
| C1_05540C_A | -3.02832 | 5.57E-05 | 3642503  |
| C1_10580C_A | -3.03672 | 0.011782 | 3647679  |
| RTA3        | -3.03858 | 0.000263 | 3646566  |
| C4_06040W_A | -3.04274 | 0.001713 | 3646521  |
| C1_07640C_A | -3.04639 | 0.001801 | 3646659  |
| PGA55       | -3.05375 | 1.04E-05 | 3645784  |
| CET1        | -3.05661 | 1.25E-05 | 3640140  |
| CCC2        | -3.05678 | 1.02E-05 | 3637821  |
| C2_02110C_A | -3.05883 | 0.004524 | 3635745  |
| IML1        | -3.06116 | 0.000103 | 3636813  |
| DUG3        | -3.06336 | 3E-05    | 3641381  |
| CR_08410W_A | -3.06399 | 4.52E-06 | 3642116  |
| C4_03580W_A | -3.06418 | 0.012959 | 3645369  |
| DAL5        | -3.07459 | 0.004756 | 3638401  |
| C6_02970C_A | -3.07486 | 7.37E-05 | 3639190  |
| C6_03290W_A | -3.08025 | 2.16E-06 | 3639195  |
| BAS1        | -3.08123 | 1.95E-06 | 3641136  |
| C6_04050W_A | -3.08138 | 0.000241 | 3647830  |
| C2_02570W_A | -3.08223 | 0.00556  | 3635858  |
| C1_05920W_A | -3.08676 | 0.03914  | 3639864  |
| MNL1        | -3.09105 | 6.15E-07 | 3646050  |
| C2_05060C_A | -3.09119 | 0.008025 | 3643451  |

|             |          |          |          |
|-------------|----------|----------|----------|
| PUT4        | -3.09678 | 0.036166 | 3636801  |
| CR_00810W_A | -3.09762 | 0.001028 | 3640415  |
| CR_03120W_A | -3.10443 | 4.11E-06 | 3645123  |
| LEU5        | -3.11571 | 3.68E-06 | 3638838  |
| C4_00460C_A | -3.11583 | 1.26E-06 | 3645010  |
| ARG81       | -3.11718 | 1.33E-06 | 3634775  |
| CR_03980W_A | -3.11783 | 0.000112 | 3640964  |
| CR_04710W_A | -3.11805 | 0.017959 | 3648141  |
| SGD1        | -3.11843 | 2.91E-06 | 3643191  |
| DFG16       | -3.1266  | 1.3E-05  | 3637413  |
| C3_05360C_A | -3.12733 | 0.000189 | 3643676  |
| C1_10950C_A | -3.13157 | 1.46E-05 | 3644428  |
| C6_01450C_A | -3.13535 | 0.00014  | 3641624  |
| PDX3        | -3.13559 | 2.62E-06 | 3640949  |
| C4_00690C_A | -3.13695 | 9.11E-06 | 3645752  |
| C6_03590C_A | -3.14051 | 0.002682 | 3640251  |
| VPH2        | -3.14108 | 0.005547 | 3642021  |
| C3_02840W_A | -3.14244 | 0.005364 | 3638331  |
| C1_05200C_A | -3.14579 | 3.14E-05 | 3642466  |
| C2_09710C_A | -3.146   | 0.000295 | 3643786  |
| C1_12750C_A | -3.14654 | 0.000282 | 3646818  |
| SSY5        | -3.14988 | 8.58E-07 | 3642140  |
| FZO1        | -3.15482 | 3.29E-06 | 3646848  |
| CR_03730C_A | -3.15542 | 8.59E-07 | 3643226  |
| C2_06520C_A | -3.15605 | 0.000753 | 3646571  |
| C3_02630C_A | -3.15753 | 2.05E-05 | 3638328  |
| CR_05440W_A | -3.162   | 0.000155 | 3648245  |
| TSR2        | -3.16696 | 0.000127 | 3636845  |
| C2_05840W_A | -3.19559 | 0.000116 | 3647484  |
| SPT5        | -3.1979  | 3.68E-06 | 3635847  |
| SFT2        | -3.20094 | 0.000115 | 3644442  |
| ABC1        | -3.20175 | 2.6E-06  | 3640239  |
| GLK1        | -3.20235 | 0.001055 | 3648348  |
| CR_03360W_A | -3.20755 | 1.09E-06 | 3645141  |
| C3_02040C_A | -3.20761 | 2.03E-05 | 3636579  |
| C1_11670W_A | -3.2142  | 2.74E-05 | 3645338  |
| C1_05790W_A | -3.2151  | 0.002562 | 30515002 |
| SEC2        | -3.22156 | 2.59E-06 | 3636119  |
| C4_02570C_A | -3.22613 | 0.001099 | 3637916  |
| SPO7        | -3.22704 | 0.000118 | 3645576  |
| C2_00190C_A | -3.22905 | 9.51E-07 | 3638904  |
| NBP2        | -3.23079 | 1.97E-06 | 3636963  |
| C4_00060W_A | -3.2315  | 2.59E-05 | 3648061  |
| CDG1        | -3.23197 | 3.9E-05  | 3641883  |
| SSK1        | -3.23502 | 5.09E-05 | 3636184  |
| IFF4        | -3.23993 | 0.003138 | 3639694  |
| KTI12       | -3.2405  | 7.28E-05 | 3645140  |

|             |          |          |          |
|-------------|----------|----------|----------|
| C3_04720C_A | -3.24168 | 5.09E-05 | 3635249  |
| C5_01710C_A | -3.24198 | 4.78E-05 | 3643732  |
| CDC34       | -3.24231 | 9.71E-07 | 3637028  |
| C2_10090C_A | -3.24421 | 1.38E-05 | 3643939  |
| CR_02550C_A | -3.24458 | 1.51E-05 | 3647689  |
| C4_02770C_A | -3.24678 | 0.000327 | 3637903  |
| CR_01710W_A | -3.24956 | 0.000471 | 3640130  |
| C3_00940W_A | -3.25243 | 1.63E-08 | 3639851  |
| PHHB        | -3.25752 | 0.00047  | 3638871  |
| PAN6        | -3.26445 | 2.33E-05 | 3647684  |
| C5_00390C_A | -3.26816 | 4.01E-06 | 3641552  |
| VPS27       | -3.27556 | 2.13E-07 | 3639326  |
| PTP2        | -3.28337 | 1.27E-06 | 3647858  |
| NDT80       | -3.28545 | 1.78E-06 | 3638840  |
| NOP6        | -3.28855 | 4.95E-06 | 3639507  |
| MRP17       | -3.28887 | 4.45E-06 | 3641548  |
| C3_00010C_A | -3.28897 | 0.015649 | 3640600  |
| VPS24       | -3.29658 | 2.6E-06  | 3638892  |
| ISY1        | -3.29663 | 0.0009   | 3646233  |
| FET34       | -3.30118 | 0.000158 | 3647131  |
| C6_00530C_A | -3.30576 | 0.002757 | 30515326 |
| CTA8        | -3.31656 | 2E-06    | 3634947  |
| RTG1        | -3.31852 | 3.17E-05 | 3634929  |
| C1_09850C_A | -3.32323 | 9.47E-08 | 3634849  |
| HNH1        | -3.32945 | 2.19E-05 | 3638857  |
| RGT1        | -3.33215 | 3.72E-05 | 3637920  |
| C6_04530C_A | -3.34818 | 4.68E-06 | 3645970  |
| SLK19       | -3.35099 | 4.26E-05 | 3638466  |
| C6_01620W_A | -3.35334 | 4.66E-05 | 3641647  |
| C2_00600C_A | -3.36052 | 3.99E-07 | 3638850  |
| MRF1        | -3.36066 | 0.000176 | 3645321  |
| RFG1        | -3.36589 | 3.17E-09 | 3642570  |
| C7_01940C_A | -3.36711 | 6.59E-06 | 3636971  |
| AXL1        | -3.3694  | 0.002628 | 3641938  |
| C5_03740W_A | -3.37007 | 1.43E-05 | 3647237  |
| NPR2        | -3.37235 | 1.4E-05  | 3638360  |
| MLH3        | -3.37247 | 3.48E-06 | 3643294  |
| ZCF28       | -3.37537 | 0.000143 | 3634776  |
| C3_07490W_A | -3.37852 | 3.72E-07 | 3638528  |
| CYS3        | -3.38083 | 4.58E-06 | 3642081  |
| SLR1        | -3.3828  | 3.06E-07 | 3643957  |
| C2_02920W_A | -3.39798 | 9.51E-07 | 3643016  |
| PUF3        | -3.40293 | 3.39E-07 | 3646950  |
| C1_04710C_A | -3.40661 | 1.27E-05 | 3644764  |
| C1_04360C_A | -3.4113  | 2.34E-05 | 30514985 |
| KAR4        | -3.41267 | 0.007962 | 3644937  |
| NPR1        | -3.41627 | 8.83E-08 | 3639498  |

|             |          |          |          |
|-------------|----------|----------|----------|
| CUP2        | -3.41753 | 4.75E-07 | 3636189  |
| CIP1        | -3.43046 | 0.002363 | 3644018  |
| C3_07580W_A | -3.43239 | 3.69E-05 | 30515225 |
| CR_01090W_A | -3.43298 | 1.63E-06 | 3640379  |
| IFF3        | -3.43303 | 3.45E-06 | 3643189  |
| MTM1        | -3.435   | 1.57E-05 | 3642487  |
| PGA4        | -3.44206 | 3.61E-07 | 3636406  |
| FMP27       | -3.44414 | 2.28E-07 | 3641645  |
| CR_04350C_A | -3.44757 | 2.09E-06 | 3641001  |
| C1_10120C_A | -3.45514 | 6.94E-08 | 3634779  |
| RVS161      | -3.45826 | 3.15E-08 | 3638005  |
| C2_00280C_A | -3.47503 | 0.00026  | 3638802  |
| CR_10800C_A | -3.47634 | 1.45E-06 | 3638948  |
| OLE2        | -3.47955 | 1.96E-07 | 3643503  |
| C1_03120W_A | -3.48029 | 6.76E-08 | 3636926  |
| C3_06700C_A | -3.48747 | 5.08E-06 | 3642247  |
| C6_04300W_A | -3.49055 | 1.84E-05 | 3646286  |
| OSM1        | -3.49537 | 8.51E-06 | 3645573  |
| GAL1        | -3.51389 | 2.71E-06 | 3644581  |
| BPH1        | -3.51642 | 0.000252 | 3639547  |
| CR_06290C_A | -3.52033 | 5.44E-05 | 3644856  |
| C2_02280W_A | -3.52218 | 2.38E-07 | 3635806  |
| YAK1        | -3.52479 | 7.85E-08 | 3647801  |
| C2_00770W_A | -3.52838 | 8.47E-05 | 3638909  |
| C2_01060C_A | -3.53756 | 0.000546 | 3638835  |
| RPD3        | -3.55096 | 1.52E-06 | 3642580  |
| C5_00100C_A | -3.5519  | 0.000346 | 3647883  |
| C3_03370C_A | -3.55802 | 8.39E-07 | 3638366  |
| CR_05730C_A | -3.56523 | 8.36E-08 | 3646698  |
| C3_01770C_A | -3.57855 | 1.32E-05 | 3636588  |
| C5_01730W_A | -3.5833  | 0.003895 | 3643730  |
| C2_08340C_A | -3.59143 | 0.035798 | 3648165  |
| CR_01600C_A | -3.59448 | 2.99E-05 | 3640080  |
| C1_12150C_A | -3.5945  | 0.003149 | 3642049  |
| C3_06820C_A | -3.60775 | 7.37E-07 | 3638544  |
| FRP1        | -3.60838 | 4.14E-07 | 3645005  |
| CR_03160W_A | -3.61337 | 7.38E-05 | 3645117  |
| C5_02070C_A | -3.61445 | 8.54E-08 | 3643746  |
| NCR1        | -3.61822 | 9.49E-06 | 3643314  |
| ZCF30       | -3.62608 | 2.43E-07 | 3642051  |
| HN3         | -3.62682 | 0.002168 | 3640093  |
| DES1        | -3.63975 | 9.19E-09 | 3636529  |
| C2_10790C_A | -3.64317 | 7.42E-06 | 3641242  |
| MDJ1        | -3.64647 | 9.15E-09 | 3646980  |
| SPT14       | -3.64673 | 1.13E-07 | 3641019  |
| PGA62       | -3.65    | 9.62E-07 | 3637879  |
| COX17       | -3.65193 | 0.001771 | 30515088 |

|             |          |          |          |
|-------------|----------|----------|----------|
| CR_07250C_A | -3.65595 | 5.29E-05 | 3646028  |
| VPS13       | -3.68002 | 1.03E-05 | 3646528  |
| TCO89       | -3.68285 | 1.37E-08 | 3644788  |
| GPR1        | -3.68882 | 2.18E-07 | 3642616  |
| C2_05820W_A | -3.70078 | 4.46E-07 | 3647482  |
| CR_00310C_A | -3.70177 | 5.83E-06 | 3639715  |
| C1_07790C_A | -3.70628 | 6.52E-06 | 3640706  |
| C1_05250W_A | -3.71186 | 0.008931 | 3642462  |
| HGT6        | -3.71712 | 1.58E-06 | 3638873  |
| C2_02530W_A | -3.7224  | 0.048128 | 3635819  |
| C2_05770W_A | -3.73945 | 6.5E-06  | 3645579  |
| SEN2        | -3.74345 | 0.000402 | 3637832  |
| C6_02930W_A | -3.75035 | 1.2E-08  | 3639243  |
| HBR3        | -3.75419 | 9.54E-06 | 3645652  |
| SNT1        | -3.75755 | 3.13E-09 | 3642033  |
| HOS3        | -3.75996 | 8.73E-08 | 3637886  |
| RGS2        | -3.76803 | 6.32E-06 | 3646629  |
| C1_14480W_A | -3.77371 | 8.61E-05 | 3643328  |
| FDH1        | -3.7744  | 0.003909 | 3646398  |
| GRF10       | -3.77969 | 2.77E-10 | 3636492  |
| C1_13010W_A | -3.78025 | 5.73E-08 | 3636120  |
| BMT5        | -3.78181 | 3.82E-08 | 3635781  |
| CR_04920W_A | -3.78355 | 5.39E-08 | 3648207  |
| C2_03570C_A | -3.7862  | 0.001923 | 3637336  |
| C1_11580W_A | -3.78669 | 5.51E-07 | 3645330  |
| OPT3        | -3.78926 | 3.22E-08 | 3644918  |
| MNN4-4      | -3.79032 | 0.000792 | 3639250  |
| CHR1        | -3.81794 | 1.59E-09 | 3647601  |
| RRN3        | -3.83161 | 5.49E-07 | 3647925  |
| CR_07140C_A | -3.84032 | 0.00021  | 3648227  |
| QDR3        | -3.84046 | 4.58E-06 | 3644023  |
| C6_02980C_A | -3.84497 | 2.74E-09 | 3639192  |
| DRE2        | -3.85269 | 1.59E-07 | 3642571  |
| C1_01510W_A | -3.85794 | 0.001399 | 3640229  |
| RCA1        | -3.86009 | 1.5E-08  | 3639303  |
| C2_07250C_A | -3.868   | 0.008835 | 3643487  |
| HAP41       | -3.86947 | 2.06E-08 | 3647405  |
| C5_04860C_A | -3.87126 | 0.014919 | 3636437  |
| C1_10230C_A | -3.87971 | 3.12E-07 | 3634880  |
| PMC1        | -3.88024 | 1.04E-07 | 3636627  |
| PNC1        | -3.88964 | 1.09E-05 | 3646232  |
| C1_08840W_A | -3.89773 | 0.018907 | 3634919  |
| C5_04080C_A | -3.89773 | 4.68E-08 | 3647731  |
| C2_10540W_A | -3.89933 | 1.88E-07 | 3641200  |
| C4_04460C_A | -3.90485 | 3.53E-08 | 3641127  |
| C2_06800C_A | -3.90943 | 7.9E-06  | 3643518  |
| ATX1        | -3.91919 | 0.001086 | 30515426 |

|             |          |          |          |
|-------------|----------|----------|----------|
| C6_03460W_A | -3.9224  | 4.82E-09 | 3640252  |
| C1_14250C_A | -3.92394 | 1.85E-06 | 3643307  |
| MOH1        | -3.93594 | 4.55E-09 | 3646809  |
| CR_03660C_A | -3.95153 | 2.82E-06 | 3643219  |
| C1_14580C_A | -3.95559 | 1.91E-07 | 3643290  |
| C1_03750W_A | -3.96997 | 5.1E-06  | 3644690  |
| C5_00570W_A | -3.97325 | 5.08E-07 | 3641589  |
| C3_00410C_A | -3.97475 | 0.014055 | 3640552  |
| FGR23       | -3.97775 | 1.55E-08 | 3636555  |
| COX19       | -3.99665 | 2.51E-06 | 3636220  |
| C2_10050W_A | -3.99684 | 1.45E-07 | 3643949  |
| NAB3        | -3.99712 | 3.45E-07 | 3639209  |
| C1_01150C_A | -4.00193 | 7.37E-08 | 3640203  |
| NBN1        | -4.00261 | 2.04E-07 | 3637410  |
| C2_08850C_A | -4.00787 | 1E-07    | 3643890  |
| IFR1        | -4.01269 | 0.003147 | 3643930  |
| C3_05800W_A | -4.01411 | 1.07E-08 | 3641754  |
| CR_03870W_A | -4.01501 | 0.000346 | 3643187  |
| POP3        | -4.02039 | 6.84E-05 | 3638993  |
| C2_02300W_A | -4.03182 | 1.73E-05 | 3635808  |
| CR_07910C_A | -4.03894 | 6.5E-07  | 3644142  |
| CR_10000C_A | -4.04315 | 0.001822 | 3639030  |
| C2_06510W_A | -4.04651 | 5.66E-06 | 3646570  |
| C4_00260W_A | -4.054   | 1.49E-10 | 3645037  |
| CCS1        | -4.05545 | 1.08E-09 | 3644476  |
| C1_07560W_A | -4.06265 | 2.85E-05 | 3646676  |
| UTP22       | -4.06323 | 2.6E-09  | 3635760  |
| C2_00200W_A | -4.07083 | 9.66E-08 | 3638903  |
| C3_02890C_A | -4.07491 | 0.00954  | 3638336  |
| C1_09790C_A | -4.08791 | 7.14E-09 | 3634843  |
| C4_04560C_A | -4.09517 | 2.6E-09  | 3641105  |
| C7_02110W_A | -4.09929 | 8.07E-10 | 3637022  |
| C2_10810W_A | -4.10949 | 5.63E-09 | 3641243  |
| ALP1        | -4.11888 | 1.75E-09 | 3644437  |
| ADR1        | -4.13077 | 1.07E-07 | 3637866  |
| TOK1        | -4.13924 | 4.09E-08 | 3645754  |
| CR_09460C_A | -4.14043 | 1.57E-05 | 30515453 |
| SOK1        | -4.14444 | 4.37E-07 | 3642495  |
| C3_07370W_A | -4.15015 | 7.3E-08  | 3638474  |
| C6_00170C_A | -4.15085 | 4.95E-10 | 3647903  |
| C4_03000C_A | -4.15111 | 9.4E-07  | 3637935  |
| VPS21       | -4.1569  | 1.74E-09 | 3642092  |
| MLP1        | -4.15919 | 5.24E-08 | 3635688  |
| SUT1        | -4.16506 | 7.88E-06 | 3637706  |
| PUT2        | -4.17366 | 4.08E-09 | 3636439  |
| CYC3        | -4.17515 | 1.16E-09 | 3642621  |
| CR_08720W_A | -4.17784 | 0.00017  | 3642122  |

|             |          |          |          |
|-------------|----------|----------|----------|
| DAC1        | -4.18984 | 2.29E-07 | 3645967  |
| C1_11020W_A | -4.19093 | 4.87E-05 | 3644420  |
| PZF1        | -4.20689 | 9.35E-07 | 3648113  |
| CR_04600W_A | -4.21645 | 3.94E-07 | 3640950  |
| C1_11290W_A | -4.22358 | 0.000205 | 3644553  |
| C7_01150W_A | -4.23968 | 2.17E-05 | 3645913  |
| PGA7        | -4.25526 | 1.13E-08 | 3645006  |
| PNG2        | -4.25543 | 3.38E-06 | 3645568  |
| C6_03440W_A | -4.25564 | 2.27E-08 | 3640274  |
| PTC8        | -4.26244 | 2.02E-09 | 3635674  |
| OPT7        | -4.27566 | 0.002623 | 3645008  |
| HGT4        | -4.2869  | 2.95E-06 | 3635269  |
| TRY6        | -4.30119 | 0.017559 | 3638499  |
| C6_04180W_A | -4.30404 | 4.55E-07 | 3648176  |
| C4_02520C_A | -4.30735 | 1.83E-09 | 3637863  |
| C7_00260C_A | -4.30994 | 1.63E-07 | 3637978  |
| REG1        | -4.3174  | 2.96E-07 | 3638858  |
| C3_07670W_A | -4.32211 | 3.59E-10 | 3638460  |
| C1_06510C_A | -4.32512 | 1.64E-08 | 3639549  |
| CR_03710C_A | -4.35504 | 3.38E-08 | 3643224  |
| CR_07830C_A | -4.35677 | 4.29E-13 | 3647345  |
| C3_01430W_A | -4.35966 | 8.49E-06 | 3636633  |
| C2_00540W_A | -4.37058 | 1.56E-07 | 3638865  |
| C4_06080W_A | -4.37157 | 0.007363 | 30515280 |
| C3_03000W_A | -4.37269 | 0.00868  | 3638389  |
| C2_04280W_A | -4.37807 | 3.2E-05  | 3637326  |
| CR_08680C_A | -4.38055 | 1.09E-10 | 3642127  |
| PRB1        | -4.38752 | 3.84E-09 | 3643521  |
| C1_08700W_A | -4.40136 | 3.09E-11 | 3634936  |
| C1_11680C_A | -4.40709 | 0.001036 | 30515056 |
| C6_03200W_A | -4.41261 | 2.52E-08 | 3639177  |
| C7_03410C_A | -4.41577 | 0.01298  | 3646716  |
| HRR25       | -4.4217  | 1.97E-10 | 3645878  |
| SOD3        | -4.42419 | 4.38E-09 | 30515347 |
| ZCF16       | -4.43604 | 0.000294 | 3647395  |
| C2_00940W_A | -4.43785 | 5.78E-11 | 3638891  |
| C2_04850C_A | -4.44474 | 4.51E-09 | 3648114  |
| C2_06600W_A | -4.44618 | 1.35E-09 | 3646563  |
| C5_03870C_A | -4.46123 | 8.33E-06 | 3647223  |
| THI20       | -4.46258 | 0.000377 | 3637387  |
| HIT1        | -4.4635  | 0.000527 | 3637854  |
| NAG6        | -4.46441 | 1.61E-10 | 3645961  |
| C6_00380C_A | -4.46534 | 1.24E-06 | 3646085  |
| MIH1        | -4.46554 | 8.56E-07 | 3648188  |
| BRE1        | -4.46885 | 1.94E-10 | 3641568  |
| ZCF3        | -4.46886 | 6.75E-11 | 3645335  |
| C4_04010W_A | -4.47888 | 0.000195 | 3641218  |

|             |          |          |          |
|-------------|----------|----------|----------|
| HNT1        | -4.4894  | 2.6E-08  | 3644441  |
| C3_05850W_A | -4.51835 | 1.72E-05 | 3641758  |
| AUR1        | -4.53177 | 2.32E-11 | 3642617  |
| TRY3        | -4.53666 | 2.51E-07 | 3642652  |
| C3_02710W_A | -4.55663 | 3.35E-07 | 30515190 |
| RPC10       | -4.56698 | 4.37E-09 | 3643292  |
| FBP1        | -4.58184 | 7.92E-09 | 3647464  |
| PRN1        | -4.58214 | 0.000408 | 3639882  |
| GCV2        | -4.58414 | 3.01E-08 | 3646505  |
| C6_00700C_A | -4.59656 | 6.21E-07 | 3647074  |
| MED3        | -4.60005 | 2.2E-05  | 3646522  |
| C1_08350C_A | -4.60138 | 5.44E-08 | 30515030 |
| CR_08080W_A | -4.60335 | 0.014188 | 3642094  |
| CR_08580C_A | -4.60745 | 3.07E-06 | 3642105  |
| LPI9        | -4.61099 | 1.37E-10 | 3637060  |
| VPS28       | -4.61749 | 1.05E-07 | 3645794  |
| PDR16       | -4.62706 | 5.3E-06  | 3644679  |
| C1_03270W_A | -4.63134 | 1.31E-08 | 3636900  |
| BUL4        | -4.63398 | 2.61E-06 | 3642037  |
| XYL2        | -4.63612 | 6.96E-06 | 3638961  |
| UGT51C1     | -4.64188 | 1.42E-07 | 3640147  |
| C6_03800C_A | -4.6447  | 1.03E-11 | 3640310  |
| MEP2        | -4.66073 | 9.85E-08 | 3645022  |
| DEF1        | -4.66224 | 2.35E-09 | 3639023  |
| ADA2        | -4.69729 | 1.65E-07 | 3644450  |
| FLO8        | -4.69955 | 5.6E-12  | 3646292  |
| TYE7        | -4.71144 | 3.35E-09 | 3636203  |
| TRK1        | -4.71441 | 1.93E-09 | 3644153  |
| C7_03970C_A | -4.71627 | 4.21E-07 | 3643117  |
| CR_02930W_A | -4.74421 | 1.19E-07 | 3642588  |
| HAP2        | -4.74629 | 2.62E-12 | 3641800  |
| CR_05540C_A | -4.74883 | 1.72E-09 | 3647594  |
| C2_06570C_A | -4.75852 | 1.77E-10 | 3646561  |
| WOR4        | -4.76343 | 2.09E-10 | 3638454  |
| C3_06560W_A | -4.76658 | 6.99E-11 | 3642276  |
| CDR1        | -4.7784  | 7.68E-11 | 3635237  |
| ALS5        | -4.77997 | 1.57E-08 | 3640277  |
| C7_00590W_A | -4.78632 | 2.72E-08 | 3637994  |
| DYN1        | -4.78687 | 1.33E-06 | 3635236  |
| RXT3        | -4.78808 | 2.94E-08 | 3643431  |
| ARG8        | -4.80505 | 1.25E-05 | 3641131  |
| C2_10170C_A | -4.81615 | 1.12E-10 | 3643931  |
| C1_10060C_A | -4.84443 | 0.000556 | 3634812  |
| RAS2        | -4.85772 | 2.15E-11 | 3635211  |
| C3_04510W_A | -4.86076 | 0.000297 | 3635258  |
| NCE102      | -4.8694  | 1.9E-09  | 3635267  |
| CAN3        | -4.91441 | 3E-10    | 3647066  |



|             |          |          |          |
|-------------|----------|----------|----------|
| C1_11410C_A | -4.9269  | 0.001036 | 30515054 |
| RIM21       | -4.93111 | 6.13E-09 | 3643739  |
| C1_05330C_A | -4.94098 | 2.47E-08 | 3642485  |
| C1_11620W_A | -4.94915 | 0.001672 | 3645344  |
| C2_05810W_A | -4.9523  | 3.49E-12 | 3647481  |
| C6_03370W_A | -4.95289 | 1.52E-10 | 3639230  |
| C1_01890C_A | -4.96243 | 3.75E-12 | 3645427  |
| C1_13880C_A | -4.96506 | 6.07E-11 | 3636133  |
| STP2        | -4.96921 | 3.46E-10 | 3636214  |
| C2_04110W_A | -4.98027 | 0.000722 | 3637378  |
| C3_05450C_A | -4.98283 | 4.96E-11 | 3643669  |
| C5_02020C_A | -4.98346 | 3.18E-09 | 3643771  |
| CBF1        | -4.98586 | 1.3E-06  | 3642779  |
| SEN15       | -4.99851 | 0.000187 | 3646411  |
| C1_09320C_A | -4.99997 | 5.11E-11 | 3634834  |
| C3_05250C_A | -5.0065  | 1.89E-06 | 3635199  |
| PGA41       | -5.0069  | 0.00277  | 3642800  |
| PRA1        | -5.0073  | 0.002266 | 3642969  |
| SLM2        | -5.01683 | 2.93E-16 | 3647559  |
| HGT18       | -5.02615 | 0.000348 | 3645111  |
| C2_07580W_A | -5.04095 | 0.000224 | 3645216  |
| SOD6        | -5.06723 | 7.5E-06  | 3638899  |
| NAG1        | -5.08907 | 8.24E-09 | 3645966  |
| FGR13       | -5.09258 | 3.27E-05 | 3648078  |
| EBP1        | -5.11369 | 1.09E-09 | 3644060  |
| C1_13820C_A | -5.11906 | 3.74E-09 | 3636127  |
| C4_05970W_A | -5.12328 | 1.34E-11 | 3646514  |
| OYE23       | -5.1316  | 0.001855 | 3641618  |
| C3_07470W_A | -5.14372 | 0.046846 | 3638479  |
| GZF3        | -5.15622 | 1.82E-13 | 3642563  |
| CR_02910W_A | -5.15804 | 3.56E-11 | 3642586  |
| C5_04170W_A | -5.15816 | 2.69E-14 | 3636543  |
| CR_09140C_A | -5.15927 | 2E-06    | 3641879  |
| FUN31       | -5.16009 | 7.59E-10 | 3642249  |
| PDR6        | -5.16412 | 1.07E-08 | 3638824  |
| ATG15       | -5.16683 | 2.9E-13  | 3641641  |
| C1_03140W_A | -5.18093 | 3.23E-08 | 3636929  |
| C2_07640W_A | -5.18695 | 1.97E-11 | 3645192  |
| C1_14330W_A | -5.21325 | 1.4E-08  | 3643278  |
| C7_01700W_A | -5.23514 | 7.38E-10 | 3637013  |
| C4_01970W_A | -5.24072 | 1.11E-09 | 3635663  |
| C3_02980C_A | -5.24274 | 5.59E-05 | 3638386  |
| PRP8        | -5.24567 | 1.92E-12 | 3642125  |
| C2_05990C_A | -5.25356 | 0.001603 | 3644074  |
| C4_03020W_A | -5.25794 | 7.56E-14 | 3637934  |
| C4_07040W_A | -5.2593  | 0.001413 | 3642963  |
| C1_07220W_A | -5.26279 | 5.44E-10 | 3644460  |

|             |          |          |          |
|-------------|----------|----------|----------|
| C1_00860W_A | -5.27918 | 3.99E-05 | 3639358  |
| C1_01140C_A | -5.28358 | 8.02E-09 | 3640202  |
| C4_00080C_A | -5.2851  | 8.25E-06 | 3648065  |
| FTR1        | -5.31194 | 1.79E-12 | 3643318  |
| OPT1        | -5.31497 | 8.83E-05 | 3640150  |
| YME1        | -5.36412 | 4.3E-09  | 3641816  |
| C1_09130W_A | -5.36952 | 6.13E-09 | 3634943  |
| C7_03550C_A | -5.3795  | 0.026176 | 3646235  |
| POL93       | -5.38109 | 6.02E-11 | 3639299  |
| HEM3        | -5.38753 | 1.04E-10 | 3643940  |
| CAG1        | -5.39537 | 6.01E-05 | 3636469  |
| CPA2        | -5.39742 | 2.84E-07 | 3640385  |
| CR_07820W_A | -5.39745 | 0.022579 | 3647344  |
| C1_10140C_A | -5.40877 | 1.59E-09 | 3634780  |
| CR_10060W_A | -5.41056 | 9.54E-14 | 3639035  |
| C2_03110W_A | -5.41911 | 0.00107  | 3642995  |
| UGA3        | -5.42906 | 9.29E-13 | 3638926  |
| C6_00290W_A | -5.43919 | 5.57E-12 | 3646069  |
| C7_03280C_A | -5.44915 | 1.05E-09 | 3641353  |
| RAD3        | -5.47842 | 2.89E-14 | 3638014  |
| C2_07280W_A | -5.48795 | 0.002199 | 3643475  |
| IHD1        | -5.50418 | 4.31E-06 | 3640291  |
| TOR1        | -5.51965 | 4.15E-12 | 3643480  |
| ADH5        | -5.5265  | 4.11E-07 | 3640156  |
| C1_06840C_A | -5.54102 | 1.52E-12 | 30515012 |
| C2_06740W_A | -5.55208 | 1.12E-09 | 3648024  |
| C6_02020C_A | -5.56123 | 3.92E-09 | 3647563  |
| SPO72       | -5.57868 | 7.02E-10 | 3644072  |
| NBP35       | -5.63134 | 2.24E-13 | 3647412  |
| HSK3        | -5.63864 | 2.3E-07  | 3635730  |
| FAV1        | -5.65279 | 0.005068 | 3641115  |
| C2_01660C_A | -5.66278 | 3.06E-09 | 3635742  |
| C1_05370C_A | -5.67236 | 1.21E-10 | 3642481  |
| C2_08030W_A | -5.68619 | 1.14E-06 | 3642309  |
| AMS1        | -5.71329 | 3.81E-10 | 3637882  |
| ATG9        | -5.71849 | 7.95E-10 | 3635239  |
| C4_04660C_A | -5.72139 | 2.8E-13  | 3641150  |
| DED1        | -5.72961 | 3.79E-09 | 3641752  |
| SCH9        | -5.74413 | 4.66E-12 | 3637421  |
| QDR2        | -5.76669 | 1.28E-12 | 3643661  |
| PFK26       | -5.7832  | 3.17E-09 | 3634912  |
| C2_03760C_A | -5.81621 | 3.95E-16 | 3637371  |
| YPT53       | -5.82035 | 9.9E-10  | 3642483  |
| ALS9        | -5.83574 | 1.29E-10 | 3640281  |
| IFF6        | -5.85001 | 3.57E-14 | 3644087  |
| C1_05930C_A | -5.85653 | 2.19E-14 | 3639862  |
| C1_01630W_A | -5.85913 | 5.46E-13 | 3640194  |

|             |          |          |          |
|-------------|----------|----------|----------|
| C4_05590W_A | -5.87381 | 5.71E-13 | 3641776  |
| HSP70       | -5.88316 | 9.59E-07 | 3636229  |
| CEK2        | -5.90117 | 7.52E-05 | 3642459  |
| SPO11       | -5.90347 | 0.000859 | 3643873  |
| CR_00750C_A | -5.9058  | 8.78E-09 | 3640438  |
| C4_00100C_A | -5.90667 | 2.31E-15 | 3645004  |
| C3_00620C_A | -5.9475  | 3.67E-10 | 30515171 |
| SLD1        | -5.97665 | 3.74E-10 | 3638406  |
| MFG1        | -5.98025 | 2.16E-10 | 3643884  |
| GST2        | -6.00732 | 2.15E-12 | 3637937  |
| MSN5        | -6.01499 | 5.07E-09 | 3637889  |
| SDS24       | -6.03496 | 1.37E-11 | 3640756  |
| ARR3        | -6.0665  | 3.01E-06 | 3642910  |
| C7_00340C_A | -6.06805 | 4.31E-10 | 3638040  |
| SFC1        | -6.06998 | 2.58E-06 | 3636413  |
| CR_02510W_A | -6.09883 | 3.75E-12 | 3647694  |
| CRG1        | -6.14729 | 5.49E-06 | 3646393  |
| ALS6        | -6.17359 | 6.75E-09 | 3642266  |
| ATO10       | -6.17659 | 0.006942 | 3640394  |
| DHH1        | -6.17857 | 4.49E-10 | 3639490  |
| C1_01710W_A | -6.18305 | 3.29E-17 | 3640201  |
| C1_14350W_A | -6.20825 | 7.47E-16 | 3643281  |
| CPA1        | -6.24631 | 4.27E-08 | 3635715  |
| PEX5        | -6.25    | 1.17E-15 | 3645026  |
| CR_02800C_A | -6.25187 | 4.24E-09 | 3642559  |
| TUS1        | -6.26582 | 9.64E-13 | 3646144  |
| C1_11270W_A | -6.29682 | 1.98E-10 | 3644555  |
| C4_02690W_A | -6.36921 | 3.1E-11  | 3637861  |
| CR_06550C_A | -6.3736  | 1.28E-12 | 3645260  |
| C5_03150W_A | -6.37434 | 4.1E-14  | 3637799  |
| C1_12630C_A | -6.3939  | 2.64E-06 | 3646838  |
| FYV5        | -6.39688 | 2.61E-06 | 3647057  |
| SNQ2        | -6.40419 | 9.76E-18 | 3640290  |
| C1_00090W_A | -6.42704 | 6.96E-05 | 3639304  |
| SUA71       | -6.53064 | 5.79E-14 | 3636879  |
| C2_02550C_A | -6.53993 | 0.002804 | 3635856  |
| C2_05640W_A | -6.54959 | 7.04E-17 | 3645566  |
| C1_13250W_A | -6.56183 | 5.45E-11 | 3636143  |
| C6_02100W_A | -6.57287 | 0.004913 | 3647554  |
| SSU81       | -6.62856 | 5.97E-09 | 3634944  |
| DAL8        | -6.67359 | 7.96E-06 | 3635181  |
| C1_09240C_A | -6.67651 | 0.015471 | 3634901  |
| C6_01590W_A | -6.69691 | 1.53E-18 | 3641650  |
| C4_01220C_A | -6.70302 | 5.1E-06  | 3635650  |
| C3_01540W_A | -6.74694 | 4.51E-05 | 3636567  |
| AUT7        | -6.75164 | 2.17E-16 | 30514999 |
| C3_02920W_A | -6.75239 | 1.95E-12 | 3638379  |

|             |          |          |         |
|-------------|----------|----------|---------|
| C1_06090C_A | -6.77062 | 2.03E-12 | 3639822 |
| WSC1        | -6.77105 | 2.65E-14 | 3635138 |
| C6_00730W_A | -6.77739 | 0.037757 | 3647070 |
| GIT1        | -6.77924 | 0.024421 | 3646562 |
| C5_02680W_A | -6.79835 | 9.64E-17 | 3637774 |
| WAR1        | -6.80037 | 5.39E-11 | 3644691 |
| C5_04850W_A | -6.80456 | 3.22E-05 | 3636436 |
| C2_09820W_A | -6.81182 | 1.49E-06 | 3643801 |
| C2_04090W_A | -6.8156  | 0.043305 | 3637380 |
| DIP5        | -6.82386 | 2.28E-11 | 3636798 |
| FET31       | -6.84112 | 1.6E-09  | 3647151 |
| SLY41       | -6.85822 | 2.19E-16 | 3647139 |
| C1_09520C_A | -6.89232 | 3.41E-15 | 3634766 |
| C1_09650W_A | -6.90898 | 3.13E-18 | 3634870 |
| C2_09610W_A | -6.94219 | 2.34E-12 | 3643798 |
| C5_04840C_A | -6.9469  | 8.19E-13 | 3636435 |
| RGA2        | -6.95514 | 1.99E-17 | 3635661 |
| AOX2        | -6.96816 | 1.55E-13 | 3634945 |
| PIR32       | -6.97559 | 0.048267 | 3646670 |
| CR_08310C_A | -6.97604 | 0.040704 | 3642078 |
| C6_00980C_A | -6.98769 | 3.92E-06 | 3644046 |
| GYP7        | -7.01472 | 1.79E-18 | 3646245 |
| C3_04920C_A | -7.03003 | 1.4E-16  | 3635268 |
| MET1        | -7.04965 | 2.42E-15 | 3643014 |
| CR_08470W_A | -7.10875 | 4.06E-15 | 3642134 |
| C2_10130W_A | -7.15177 | 0.001576 | 3643935 |
| COX11       | -7.18757 | 5.04E-12 | 3646842 |
| C4_05160C_A | -7.19067 | 3.11E-16 | 3647411 |
| HGT19       | -7.19428 | 8.8E-10  | 3640558 |
| MIT1        | -7.23386 | 2.01E-15 | 3644089 |
| LIP4        | -7.26935 | 3.66E-08 | 3645987 |
| AAF1        | -7.28012 | 1.95E-18 | 3642284 |
| C5_02980C_A | -7.29834 | 4.3E-07  | 3637816 |
| SEO1        | -7.29898 | 0.000377 | 3646621 |
| SWE1        | -7.30496 | 1.89E-10 | 3634866 |
| MDM34       | -7.30948 | 7.56E-17 | 3647517 |
| C6_02660C_A | -7.30962 | 0.000136 | 3639224 |
| ISA2        | -7.32069 | 1.62E-12 | 3638513 |
| C5_03960W_A | -7.36144 | 3.92E-18 | 3647444 |
| RIM101      | -7.38059 | 7.11E-14 | 3643280 |
| C1_06980C_A | -7.38745 | 5.06E-10 | 3639565 |
| C4_07140W_A | -7.41785 | 1.06E-13 | 3642936 |
| C3_07570C_A | -7.51689 | 2.33E-10 | 3638522 |
| C5_03800W_A | -7.6003  | 4.01E-14 | 3647230 |
| SPO1        | -7.60538 | 0.001289 | 3647039 |
| C4_03230C_A | -7.60605 | 0.001751 | 3637836 |
| CSP1        | -7.60605 | 0.00197  | 3648242 |

|             |          |          |          |
|-------------|----------|----------|----------|
| ELA1        | -7.60623 | 9.66E-08 | 3644680  |
| C4_04520W_A | -7.74309 | 6.12E-15 | 3641110  |
| C7_01070C_A | -7.74722 | 1.46E-16 | 3637949  |
| INN1        | -7.76414 | 1.14E-16 | 3642578  |
| MIF2        | -7.80888 | 4.05E-17 | 3639220  |
| C1_14190C_A | -7.8182  | 4.34E-16 | 3643300  |
| C1_11320C_A | -7.85543 | 1.37E-12 | 30515052 |
| SIP5        | -8.02445 | 1.11E-24 | 3639865  |
| SUR2        | -8.05051 | 1.06E-13 | 3642973  |
| VTC4        | -8.06176 | 5.16E-19 | 3646795  |
| C5_04980W_A | -8.14661 | 2E-13    | 3636536  |
| HIP1        | -8.15488 | 9.16E-19 | 3643761  |
| MHP1        | -8.16097 | 1.72E-16 | 3642460  |
| C7_04160W_A | -8.1776  | 2.19E-08 | 3643127  |
| STB3        | -8.1852  | 9.28E-19 | 3645781  |
| HAP42       | -8.21109 | 3.59E-21 | 3635729  |
| C5_05240C_A | -8.21165 | 0.009445 | 3636471  |
| C2_08950W_A | -8.23723 | 1.01E-13 | 3645788  |
| C4_02740W_A | -8.3209  | 1.58E-13 | 3637855  |
| C3_01130C_A | -8.39306 | 9.16E-20 | 3639901  |
| ECM21       | -8.40456 | 6.54E-22 | 3634784  |
| CAN2        | -8.42946 | 7.53E-20 | 3644017  |
| YTH1        | -8.43254 | 1.56E-19 | 3645572  |
| C2_06530W_A | -8.44626 | 2.49E-11 | 3646572  |
| EPL1        | -8.45897 | 3.86E-17 | 3639732  |
| C4_06200W_A | -8.5887  | 0.000182 | 30515282 |
| PLB3        | -8.60663 | 1.2E-23  | 3647089  |
| ITR1        | -8.6216  | 5.38E-24 | 3643440  |
| CAN1        | -8.63528 | 1.01E-21 | 3644035  |
| C4_07170C_A | -8.69497 | 2.09E-05 | 30515289 |
| CR_08650C_A | -8.70534 | 8.61E-18 | 3642124  |
| C6_01780C_A | -8.71586 | 9.07E-16 | 3641636  |
| C3_06950W_A | -8.74559 | 6.14E-12 | 3638507  |
| CR_08990C_A | -8.79509 | 4.32E-17 | 3641891  |
| CR_07540C_A | -8.79884 | 0.008171 | 3648001  |
| C2_01540W_A | -8.80991 | 3.17E-08 | 3635804  |
| PTC5        | -8.82516 | 3.33E-18 | 3642072  |
| ARG1        | -8.86383 | 2.14E-20 | 3639691  |
| C2_09880C_A | -8.87931 | 3.77E-14 | 3643779  |
| CR_04220C_A | -8.88736 | 8.8E-09  | 3640943  |
| CTR2        | -8.89444 | 1.2E-20  | 3648427  |
| CUP1        | -8.98909 | 1.02E-09 | 30515318 |
| RIM8        | -9.02243 | 2.57E-20 | 3639342  |
| C1_07980C_A | -9.03345 | 2.15E-17 | 3640696  |
| C1_11200W_A | -9.03658 | 7.59E-06 | 3644396  |
| BLP1        | -9.12426 | 1.98E-18 | 30515065 |
| C2_09980W_A | -9.16294 | 7.54E-14 | 3643965  |

|             |          |          |          |
|-------------|----------|----------|----------|
| FMP45       | -9.22163 | 4.18E-11 | 3637004  |
| C6_04400W_A | -9.28204 | 4.2E-05  | 3645949  |
| WOR3        | -9.47539 | 2.52E-12 | 3641009  |
| C2_08700C_A | -9.57476 | 3.56E-19 | 3643887  |
| FRE9        | -9.58111 | 1.46E-18 | 3643452  |
| C7_00350C_A | -9.58137 | 4.4E-21  | 3638039  |
| C6_03360C_A | -9.58956 | 3.71E-07 | 3639203  |
| C4_05900C_A | -9.60072 | 5.76E-26 | 3641796  |
| HSP104      | -9.67793 | 1.82E-08 | 3642097  |
| C1_08610C_A | -9.69024 | 3.41E-20 | 3646512  |
| TPS2        | -9.72949 | 1.89E-14 | 3636892  |
| BRG1        | -9.74074 | 1.06E-15 | 3647664  |
| STF2        | -9.87105 | 1.31E-13 | 30515083 |
| C4_01240C_A | -9.92429 | 3.58E-16 | 3635705  |
| FAR1        | -9.92748 | 8.17E-11 | 3637970  |
| CR_06870C_A | -9.93891 | 0.012574 | 3647318  |
| CLG1        | -9.98552 | 3.98E-21 | 3646030  |
| STE11       | -10.0476 | 2.27E-25 | 3637369  |
| C1_09780C_A | -10.1207 | 9.12E-26 | 3634842  |
| ATG1        | -10.2471 | 1.27E-18 | 3641175  |
| C6_01020W_A | -10.3149 | 0.023509 | 3644050  |
| MLS1        | -10.3501 | 5.58E-21 | 3634875  |
| C5_04030W_A | -10.3646 | 6.11E-20 | 3647737  |
| CR_03250C_A | -10.4668 | 4.44E-26 | 3645102  |
| C5_02640W_A | -10.5072 | 8.75E-13 | 3637785  |
| C6_01870C_A | -10.5189 | 1.66E-15 | 3641625  |
| PHR3        | -10.5985 | 3.13E-26 | 3645003  |
| CRP1        | -10.669  | 2.94E-25 | 3634826  |
| C6_03180C_A | -10.7036 | 2.56E-24 | 3639261  |
| C6_02950C_A | -10.7168 | 6.25E-10 | 3639188  |
| FGR46       | -10.8202 | 0.003227 | 3638989  |
| MTLA2       | -10.8215 | 0.005043 | 3643766  |
| WHI3        | -10.8382 | 6.16E-18 | 3636991  |
| OPT2        | -10.9698 | 1.3E-06  | 3644915  |
| C1_01610C_A | -11.0054 | 2.06E-11 | 3640225  |
| C3_00030C_A | -11.0263 | 9.78E-07 | 3640571  |
| C6_01400W_A | -11.2771 | 0.000576 | 3641604  |
| C1_07160C_A | -11.3184 | 1.69E-17 | 30515020 |
| C5_01990W_A | -11.4122 | 0.000404 | 3643774  |
| C2_08920W_A | -11.4456 | 1.82E-26 | 3645797  |
| RSN1        | -11.5785 | 1.4E-25  | 3638308  |
| GCA1        | -11.6013 | 1.14E-09 | 3634903  |
| C6_02790C_A | -11.6344 | 1.89E-23 | 3639245  |
| BMT9        | -11.7109 | 3.58E-12 | 3635654  |
| FTH1        | -11.7173 | 2.12E-21 | 3634852  |
| C4_03460C_A | -11.7435 | 7.53E-05 | 3646813  |
| CR_03260W_A | -11.8704 | 8.5E-24  | 30515389 |

|             |          |          |          |
|-------------|----------|----------|----------|
| C3_02790W_A | -11.8978 | 2.2E-08  | 3638416  |
| C2_02190C_A | -11.9524 | 6.35E-13 | 3635753  |
| GAP2        | -12.079  | 2.59E-17 | 3643662  |
| ECM22       | -12.1491 | 1.5E-24  | 3648000  |
| C1_01130W_A | -12.4164 | 3E-19    | 3640178  |
| CIRT4B      | -12.4429 | 4.33E-19 | 3642560  |
| C1_11510C_A | -12.5578 | 9.77E-14 | 3645336  |
| CR_01510C_A | -12.8114 | 0.000204 | 3640104  |
| C1_13590W_A | -12.8998 | 0.005443 | 3636209  |
| CR_03670W_A | -12.9011 | 0.00398  | 3643220  |
| C3_03250W_A | -12.9816 | 5.36E-23 | 3638318  |
| GRX1        | -13.0659 | 0.024246 | 3637026  |
| AGA1        | -13.0659 | 0.024246 | 3641536  |
| CR_10310W_A | -13.0659 | 0.024246 | 3638937  |
| C4_02230C_A | -13.0668 | 0.024241 | 3635693  |
| C7_02000C_A | -13.0676 | 0.026386 | 3636964  |
| C4_07020C_A | -13.0681 | 0.024241 | 3642965  |
| FUS1        | -13.0681 | 0.024241 | 3645342  |
| CFL11       | -13.069  | 0.024599 | 3646622  |
| CTA4        | -13.0787 | 4.95E-28 | 3641743  |
| C7_01690W_A | -13.2477 | 1.75E-10 | 3636980  |
| C3_00150W_A | -13.296  | 9.04E-10 | 3640595  |
| C1_06350W_A | -13.3528 | 1.33E-30 | 3639562  |
| C3_06940W_A | -13.4721 | 2.03E-29 | 3638509  |
| C1_07530W_A | -13.4724 | 4.43E-05 | 30515025 |
| LIP1        | -13.5957 | 1.15E-05 | 3634888  |
| C3_03460C_A | -13.7732 | 1.37E-08 | 3638359  |
| ROA1        | -13.9559 | 5.6E-25  | 3645424  |
| C4_04300C_A | -14.0943 | 1.05E-10 | 3646843  |
| CR_08830W_A | -14.2121 | 2.03E-10 | 30515450 |
| C4_05350W_A | -14.4384 | 5.65E-31 | 3646948  |
| C1_10360C_A | -14.4509 | 2.27E-14 | 3634836  |
| BUB3        | -14.7045 | 6.26E-19 | 3646362  |
| C6_04200C_A | -14.7304 | 9.45E-09 | 30515344 |
| C1_07650W_A | -14.7938 | 7.58E-11 | 3646657  |
| SOD5        | -14.8446 | 1.13E-06 | 3638886  |
| ZCF2        | -14.9755 | 1.98E-28 | 3642484  |
| C4_04020C_A | -15.7131 | 0.00104  | 3641215  |
| PIR1        | -15.7818 | 5.82E-28 | 3645801  |
| SSY1        | -16.1001 | 2.58E-26 | 3637382  |
| C7_01910C_A | -16.1264 | 8.54E-20 | 3637029  |
| TPS3        | -16.7197 | 3.06E-23 | 3641205  |
| CR_09920W_A | -16.8996 | 2.77E-20 | 3639028  |
| C3_07910W_A | -17.2225 | 0.005813 | 3647449  |
| GAC1        | -17.2482 | 3.77E-28 | 3638025  |
| RCH1        | -17.3783 | 1.27E-22 | 3645002  |
| C7_02610C_A | -17.3869 | 3.85E-26 | 3648285  |

|             |          |          |          |
|-------------|----------|----------|----------|
| ARF1        | -17.4509 | 1.51E-28 | 3642130  |
| C1_01620C_A | -17.453  | 5.72E-29 | 3640193  |
| FGR47       | -17.5629 | 6.52E-35 | 3641651  |
| C2_05330C_A | -17.6642 | 3.55E-23 | 3643426  |
| UGA6        | -17.73   | 7.07E-07 | 3642975  |
| C4_07000W_A | -18.6153 | 0.008121 | 3642967  |
| HSP78       | -18.708  | 4.04E-33 | 3637414  |
| C7_00630C_A | -18.9985 | 1.23E-07 | 3638028  |
| GCA2        | -19.0589 | 6.56E-19 | 3647194  |
| C6_04420W_A | -19.35   | 2.45E-12 | 3645951  |
| YHB1        | -19.488  | 4.51E-45 | 3647353  |
| BMT1        | -19.5401 | 1.76E-24 | 3638535  |
| IFA14       | -19.643  | 9.09E-10 | 3639012  |
| PUT1        | -20.5372 | 2.37E-25 | 3637779  |
| CTN3        | -20.8799 | 1.77E-17 | 3647396  |
| CR_06140W_A | -21.2135 | 1.28E-32 | 3644862  |
| C7_02600C_A | -21.7199 | 6.78E-30 | 3648286  |
| C2_07070W_A | -22.1462 | 3.37E-20 | 3643501  |
| C1_00270W_A | -22.5076 | 1.1E-35  | 3639300  |
| C7_01680C_A | -22.5846 | 3.81E-44 | 3636981  |
| CUP9        | -22.8698 | 7.92E-35 | 3636950  |
| C2_04670W_A | -23.103  | 1.15E-14 | 3647789  |
| C6_03280W_A | -24.1676 | 0.003251 | 3639185  |
| FGR42       | -24.1676 | 0.003286 | 3647438  |
| CDR11       | -24.4726 | 6.39E-42 | 3647389  |
| C1_06430C_A | -24.7483 | 0.000202 | 3639553  |
| CTN1        | -25.3593 | 1.11E-16 | 3645414  |
| C1_09210C_A | -25.4483 | 8.39E-34 | 3634897  |
| C1_05440C_A | -25.7147 | 1.27E-29 | 3642489  |
| SRR1        | -26.1289 | 2.93E-18 | 3647589  |
| C7_01430C_A | -26.3699 | 1.51E-50 | 3636961  |
| ARG11       | -26.6101 | 1.35E-07 | 3635193  |
| ZCF1        | -27.0755 | 1.57E-29 | 3638329  |
| C5_03080C_A | -29.0749 | 2.66E-29 | 3637701  |
| TRY4        | -29.3333 | 1.59E-16 | 3635240  |
| C2_08260W_A | -29.6603 | 7.38E-11 | 3642345  |
| C6_03810W_A | -29.6611 | 5.21E-33 | 3640286  |
| PRM9        | -29.7171 | 0.002689 | 30515173 |
| CDR4        | -30.1516 | 6.94E-13 | 3640711  |
| C1_09770W_A | -30.2487 | 9.1E-27  | 3634825  |
| C2_08580W_A | -31.0222 | 4.79E-07 | 3643916  |
| HAK1        | -31.0249 | 1.51E-06 | 3639546  |
| C6_00810C_A | -31.0458 | 2E-29    | 3647068  |
| OPT4        | -32.1718 | 3.4E-27  | 3647697  |
| CR_09930W_A | -32.2966 | 2.85E-19 | 3639029  |
| SSU1        | -32.5166 | 1.03E-35 | 3641882  |
| ALS7        | -33.2278 | 9.23E-46 | 3642234  |



|             |          |          |         |
|-------------|----------|----------|---------|
| HGT17       | -33.6375 | 2.26E-05 | 3635687 |
| PHO87       | -33.6812 | 9.73E-15 | 3639861 |
| PGA48       | -36.9615 | 2.83E-32 | 3647905 |
| ICL1        | -37.2415 | 8.04E-48 | 3646146 |
| GIT3        | -37.8186 | 2.18E-55 | 3642634 |
| C2_02390W_A | -38.2371 | 2.04E-32 | 3635829 |
| CR_07680C_A | -39.099  | 1.36E-07 | 3648193 |
| C7_00880C_A | -39.8809 | 2.36E-27 | 3638052 |
| C1_05160C_A | -40.2152 | 1.73E-31 | 3642468 |
| C3_04730C_A | -40.813  | 0.000691 | 3635250 |
| C7_00770W_A | -40.8738 | 1.31E-28 | 3637959 |
| CDA2        | -43.1521 | 1.92E-08 | 3639716 |
| C2_00760C_A | -45.0281 | 8.3E-36  | 3638910 |
| C1_02690C_A | -46.6007 | 0.000518 | 3636823 |
| RHD3        | -48.6244 | 5.83E-31 | 3641212 |
| STP4        | -49.7659 | 1.1E-47  | 3637405 |
| KSP1        | -52.0796 | 1.81E-44 | 3644467 |
| IFE2        | -52.2835 | 1.73E-34 | 3648027 |
| ALD6        | -53.1957 | 2.22E-32 | 3647407 |
| C7_03560W_A | -54.9282 | 3.81E-42 | 3646236 |
| CR_04940W_A | -57.2785 | 2.22E-11 | 3648209 |
| C4_07260W_A | -60.9861 | 1.28E-13 | 3642942 |
| CR_08880C_A | -62.2809 | 5.52E-32 | 3641878 |
| C2_02130C_A | -65.5388 | 1.63E-17 | 3635747 |
| JEN2        | -65.6098 | 6.51E-31 | 3641214 |
| CFL4        | -73.4567 | 3.04E-10 | 3642639 |
| HSP31       | -85.5597 | 3.04E-11 | 3644589 |
| PRX1        | -102.178 | 5.54E-39 | 3641357 |
| C1_14630C_A | -102.652 | 1.93E-13 | 3643291 |
| C4_03340C_A | -104.734 | 2.89E-09 | 3648090 |
| GPI1        | -106.355 | 1.41E-23 | 3643680 |
| CR_01530C_A | -107.903 | 8.94E-16 | 3640072 |
| HSP21       | -138.662 | 2.05E-87 | 3637364 |
| C5_04380C_A | -146.258 | 7.48E-07 | 3636485 |
| MNN1        | -156.065 | 9.73E-22 | 3637784 |
| PGA37       | -185.083 | 1.84E-07 | 3636484 |
| C1_06620C_A | -190.557 | 0.049158 | 3639545 |
| C3_04870W_A | -190.557 | 0.049158 | 3635226 |
| C5_00810C_A | -190.557 | 0.0492   | 3644127 |
| CRZ2        | -199.772 | 1.16E-71 | 3645725 |
| C2_09330C_A | -234.324 | 0.04117  | 3644106 |
| RME1        | -261.804 | 2.75E-51 | 3644453 |
| C1_00190C_A | -267.164 | 3.76E-30 | 3639337 |
| C3_07930C_A | -292.374 | 0.038072 | 3647452 |
| C3_06660C_A | -321.845 | 0.030687 | 3642253 |
| CR_00840C_A | -321.865 | 0.031346 | 3640411 |
| CR_03320C_A | -339.357 | 0.033251 | 3645096 |

|             |          |          |          |
|-------------|----------|----------|----------|
| C3_00120W_A | -365.617 | 0.027524 | 3640566  |
| MRV4        | -496.857 | 0.019622 | 3636547  |
| HWP2        | -528.72  | 0.019289 | 3646803  |
| C2_02640C_A | -628.194 | 0.015253 | 30515095 |
| C4_06910W_A | -745.678 | 1.85E-11 | 3642933  |
| C1_09820C_A | -759.46  | 0.012435 | 3634846  |
| PGA57       | -803.044 | 0.01179  | 3635608  |
| C3_00230C_A | -978.244 | 0.009367 | 3640557  |
| HSP30       | -5260.32 | 6.78E-33 | 3645419  |
| TAR1        | -16143.3 | 1.07E-74 | 30515449 |

B45 vs Control

| Name        | Fold change | P-value | GeneID   |
|-------------|-------------|---------|----------|
| ASG7        | #N/A        | #N/A    | 3639173  |
| ATO7        | #N/A        | #N/A    | 3635814  |
| BUD20       | #N/A        | #N/A    | 3645800  |
| C1_00020C_A | #N/A        | #N/A    | 3639374  |
| C1_01720C_A | #N/A        | #N/A    | 30514964 |
| C1_01970W_A | #N/A        | #N/A    | 30514967 |
| C1_03580W_A | #N/A        | #N/A    | 30514980 |
| C1_03880C_A | #N/A        | #N/A    | 3646409  |
| C1_04440W_A | #N/A        | #N/A    | 3646138  |
| C1_05550C_A | #N/A        | #N/A    | 30514994 |
| C1_05730W_A | #N/A        | #N/A    | 30515001 |
| C1_06300W_A | #N/A        | #N/A    | 30515004 |
| C1_06310W_A | #N/A        | #N/A    | 30515005 |
| C1_06490C_A | #N/A        | #N/A    | 30515009 |
| C1_06830W_A | #N/A        | #N/A    | 30515011 |
| C1_07320W_A | #N/A        | #N/A    | 30515023 |
| C1_07450W_A | #N/A        | #N/A    | 30515024 |
| C1_07940W_A | #N/A        | #N/A    | 30515027 |
| C1_08960W_A | #N/A        | #N/A    | 30515032 |
| C1_08970W_A | #N/A        | #N/A    | 30515033 |
| C1_09500W_A | #N/A        | #N/A    | 3634764  |
| C1_09560C_A | #N/A        | #N/A    | 30515034 |
| C1_10130W_A | #N/A        | #N/A    | 30515040 |
| C1_10590W_A | #N/A        | #N/A    | 30515042 |
| C1_11180C_A | #N/A        | #N/A    | 30515050 |
| C1_11710C_A | #N/A        | #N/A    | 3645320  |
| C1_11780W_A | #N/A        | #N/A    | 30515057 |
| C1_12040W_A | #N/A        | #N/A    | 3642029  |
| C1_12980W_A | #N/A        | #N/A    | 30515068 |
| C1_12990W_A | #N/A        | #N/A    | 30515069 |
| C1_13000W_A | #N/A        | #N/A    | 30515070 |
| C1_13040C_A | #N/A        | #N/A    | 30515071 |
| C1_13500C_A | #N/A        | #N/A    | 30515075 |
| C2_00050C_A | #N/A        | #N/A    | 3647922  |

|             |      |      |          |
|-------------|------|------|----------|
| C2_00900W_A | #N/A | #N/A | 3638895  |
| C2_01460C_A | #N/A | #N/A | 3635844  |
| C2_02080W_A | #N/A | #N/A | 30515093 |
| C2_02140C_A | #N/A | #N/A | 3635748  |
| C2_03580W_A | #N/A | #N/A | 30515100 |
| C2_03630W_A | #N/A | #N/A | 3637438  |
| C2_04070C_A | #N/A | #N/A | 30515110 |
| C2_04610C_A | #N/A | #N/A | 30515113 |
| C2_05310C_A | #N/A | #N/A | 30515119 |
| C2_05420C_A | #N/A | #N/A | 30515121 |
| C2_05600W_A | #N/A | #N/A | 30515124 |
| C2_05880W_A | #N/A | #N/A | 30515129 |
| C2_06400C_A | #N/A | #N/A | 30515135 |
| C2_06410W_A | #N/A | #N/A | 30515136 |
| C2_06560W_A | #N/A | #N/A | 30515139 |
| C2_07710W_A | #N/A | #N/A | 3642305  |
| C2_08150W_A | #N/A | #N/A | 3642328  |
| C2_08520C_A | #N/A | #N/A | 30515155 |
| C2_09110C_A | #N/A | #N/A | 3644114  |
| C2_09340W_A | #N/A | #N/A | 3644107  |
| C2_09540W_A | #N/A | #N/A | 30515159 |
| C2_09550C_A | #N/A | #N/A | 30515160 |
| C2_09800C_A | #N/A | #N/A | 3643803  |
| C2_10800W_A | #N/A | #N/A | 30515169 |
| C3_00140W_A | #N/A | #N/A | 3640596  |
| C3_01050C_A | #N/A | #N/A | 3639831  |
| C3_01740C_A | #N/A | #N/A | 30515178 |
| C3_02880W_A | #N/A | #N/A | 3638335  |
| C3_03620C_A | #N/A | #N/A | 3645654  |
| C3_04150W_A | #N/A | #N/A | 30515202 |
| C3_05660C_A | #N/A | #N/A | 3643656  |
| C3_05820W_A | #N/A | #N/A | 30515212 |
| C4_00990W_A | #N/A | #N/A | 3635609  |
| C4_01570C_A | #N/A | #N/A | 30515236 |
| C4_01580C_A | #N/A | #N/A | 30515237 |
| C4_01590C_A | #N/A | #N/A | 30515238 |
| C4_01600C_A | #N/A | #N/A | 30515239 |
| C4_01610C_A | #N/A | #N/A | 30515240 |
| C4_01620C_A | #N/A | #N/A | 30515241 |
| C4_01630C_A | #N/A | #N/A | 30515242 |
| C4_01640C_A | #N/A | #N/A | 30515243 |
| C4_02650C_A | #N/A | #N/A | 30515249 |
| C4_03480C_A | #N/A | #N/A | 3646815  |
| C4_03760W_A | #N/A | #N/A | 3645355  |
| C4_04040W_A | #N/A | #N/A | 3641213  |
| C4_04400C_A | #N/A | #N/A | 30515268 |
| C4_04490C_A | #N/A | #N/A | 30515269 |

|             |      |      |          |
|-------------|------|------|----------|
| C4_06180C_A | #N/A | #N/A | 30515281 |
| C4_06520W_A | #N/A | #N/A | 30515284 |
| C4_06630C_A | #N/A | #N/A | 3642812  |
| C4_06640C_A | #N/A | #N/A | 3642811  |
| C5_00530W_A | #N/A | #N/A | 3641537  |
| C5_01030W_A | #N/A | #N/A | 30515298 |
| C5_01150C_A | #N/A | #N/A | 30515299 |
| C5_01160C_A | #N/A | #N/A | 30515300 |
| C5_02130W_A | #N/A | #N/A | 3637733  |
| C5_02850W_A | #N/A | #N/A | 30515305 |
| C5_03450W_A | #N/A | #N/A | 30515311 |
| C5_03890C_A | #N/A | #N/A | 30515312 |
| C5_04450C_A | #N/A | #N/A | 30515315 |
| C5_05510C_A | #N/A | #N/A | 3636476  |
| C6_00220C_A | #N/A | #N/A | 30515324 |
| C6_01540C_A | #N/A | #N/A | 30515333 |
| C6_02390W_A | #N/A | #N/A | 30515339 |
| C6_02400W_A | #N/A | #N/A | 30515340 |
| C6_03570W_A | #N/A | #N/A | 3640248  |
| C6_04150W_A | #N/A | #N/A | 30515343 |
| C7_00540W_A | #N/A | #N/A | 30515348 |
| C7_01000C_A | #N/A | #N/A | 3638022  |
| C7_01060W_A | #N/A | #N/A | 3637950  |
| C7_01130C_A | #N/A | #N/A | 3645912  |
| C7_01260W_A | #N/A | #N/A | 30515352 |
| C7_02190W_A | #N/A | #N/A | 30515356 |
| C7_02420C_A | #N/A | #N/A | 3636975  |
| C7_04070C_A | #N/A | #N/A | 3643153  |
| CR_00450C_A | #N/A | #N/A | 30515367 |
| CR_00500C_A | #N/A | #N/A | 30515368 |
| CR_00720W_A | #N/A | #N/A | 3640441  |
| CR_02320W_A | #N/A | #N/A | 30515381 |
| CR_02470W_A | #N/A | #N/A | 30515382 |
| CR_02660C_A | #N/A | #N/A | 30515383 |
| CR_03190C_A | #N/A | #N/A | 30515388 |
| CR_04620C_A | #N/A | #N/A | 3640952  |
| CR_04980C_A | #N/A | #N/A | 3646395  |
| CR_05350W_A | #N/A | #N/A | 30515405 |
| CR_05370W_A | #N/A | #N/A | 30515406 |
| CR_05470C_A | #N/A | #N/A | 30515409 |
| CR_06190C_A | #N/A | #N/A | 30515418 |
| CR_06200C_A | #N/A | #N/A | 30515419 |
| CR_06210C_A | #N/A | #N/A | 30515420 |
| CR_06220C_A | #N/A | #N/A | 30515421 |
| CR_06580W_A | #N/A | #N/A | 3646627  |
| CR_06600C_A | #N/A | #N/A | 30515422 |
| CR_06630W_A | #N/A | #N/A | 30515423 |

|             |      |      |          |
|-------------|------|------|----------|
| CR_07300W_A | #N/A | #N/A | 3646059  |
| CR_08140W_A | #N/A | #N/A | 30515435 |
| CR_10320W_A | #N/A | #N/A | 3638938  |
| CR_10460W_A | #N/A | #N/A | 30515457 |
| CSA2        | #N/A | #N/A | 3642930  |
| FGR18       | #N/A | #N/A | 3644112  |
| FGR37       | #N/A | #N/A | 3641609  |
| GTT12       | #N/A | #N/A | 3638304  |
| ITS1        | #N/A | #N/A | 30515447 |
| ITS2        | #N/A | #N/A | 30515448 |
| MFALPHA     | #N/A | #N/A | 3646420  |
| PGA12       | #N/A | #N/A | 3638920  |
| PGA44       | #N/A | #N/A | 3636647  |
| PGA50       | #N/A | #N/A | 3647524  |
| RDN18       | #N/A | #N/A | 3648135  |
| RDN25       | #N/A | #N/A | 3648137  |
| RDN5        | #N/A | #N/A | 3648138  |
| RDN58       | #N/A | #N/A | 3648136  |
| RFC52       | #N/A | #N/A | 30514953 |
| RHD2        | #N/A | #N/A | 3637891  |
| RPR1        | #N/A | #N/A | 30515150 |
| SCR1        | #N/A | #N/A | 30515392 |
| SNR52       | #N/A | #N/A | 30515222 |
| SNR6        | #N/A | #N/A | 30515211 |
| tA(AGC)1    | #N/A | #N/A | 30515148 |
| tA(AGC)2    | #N/A | #N/A | 30515199 |
| tA(AGC)3    | #N/A | #N/A | 30514965 |
| tA(AGC)4    | #N/A | #N/A | 30514960 |
| tA(AGC)5    | #N/A | #N/A | 30515321 |
| tA(AGC)7    | #N/A | #N/A | 30515078 |
| tA(UGC)1    | #N/A | #N/A | 30515336 |
| tA(UGC)2    | #N/A | #N/A | 30515342 |
| tC(GCA)1    | #N/A | #N/A | 30515411 |
| tC(GCA)2    | #N/A | #N/A | 30515410 |
| tD(GUC)2    | #N/A | #N/A | 30515261 |
| tD(GUC)3    | #N/A | #N/A | 30515260 |
| tD(GUC)4    | #N/A | #N/A | 30515259 |
| tD(GUC)5    | #N/A | #N/A | 30515114 |
| tD(GUC)6    | #N/A | #N/A | 30515233 |
| tD(GUC)7    | #N/A | #N/A | 30515452 |
| tE(CUC)1    | #N/A | #N/A | 30515101 |
| tE(UUC)1    | #N/A | #N/A | 30515196 |
| tE(UUC)2    | #N/A | #N/A | 30515184 |
| tE(UUC)3    | #N/A | #N/A | 30515295 |
| tE(UUC)4    | #N/A | #N/A | 30515294 |
| tE(UUC)5    | #N/A | #N/A | 30515309 |
| tE(UUC)6    | #N/A | #N/A | 30515198 |

|          |      |      |          |
|----------|------|------|----------|
| tE(UUC)7 | #N/A | #N/A | 30515445 |
| tF(GAA)1 | #N/A | #N/A | 30515191 |
| tF(GAA)2 | #N/A | #N/A | 30515103 |
| tF(GAA)3 | #N/A | #N/A | 30515107 |
| tF(GAA)4 | #N/A | #N/A | 30515166 |
| tF(GAA)5 | #N/A | #N/A | 30515224 |
| tG(CCC)1 | #N/A | #N/A | 30515228 |
| tG(GCC)1 | #N/A | #N/A | 30515432 |
| tG(GCC)2 | #N/A | #N/A | 30515258 |
| tG(GCC)3 | #N/A | #N/A | 30515115 |
| tG(GCC)4 | #N/A | #N/A | 30515231 |
| tG(GCC)5 | #N/A | #N/A | 30515230 |
| tG(GCC)6 | #N/A | #N/A | 30515446 |
| tG(UCC)1 | #N/A | #N/A | 30515172 |
| tG(UCC)2 | #N/A | #N/A | 30515229 |
| tH(GUG)1 | #N/A | #N/A | 30515401 |
| tH(GUG)3 | #N/A | #N/A | 30515217 |
| tI(AAU)1 | #N/A | #N/A | 30515138 |
| tI(AAU)2 | #N/A | #N/A | 30515147 |
| tI(AAU)3 | #N/A | #N/A | 30515122 |
| tI(AAU)4 | #N/A | #N/A | 30515272 |
| tI(AAU)5 | #N/A | #N/A | 30515440 |
| tI(UAU)1 | #N/A | #N/A | 30515045 |
| tK(CUU)1 | #N/A | #N/A | 30515193 |
| tK(CUU)2 | #N/A | #N/A | 30515206 |
| tK(UUU)1 | #N/A | #N/A | 30515181 |
| tK(UUU)2 | #N/A | #N/A | 30515428 |
| tK(UUU)3 | #N/A | #N/A | 30515436 |
| tK(UUU)4 | #N/A | #N/A | 30515437 |
| tK(UUU)5 | #N/A | #N/A | 30515438 |
| tL(AAG)1 | #N/A | #N/A | 30515379 |
| tL(AAG)2 | #N/A | #N/A | 30515022 |
| tL(CAA)1 | #N/A | #N/A | 30515091 |
| tL(CAA)2 | #N/A | #N/A | 30515087 |
| tL(CAA)3 | #N/A | #N/A | 30515346 |
| tL(CAA)4 | #N/A | #N/A | 30515444 |
| tL(CAA)5 | #N/A | #N/A | 30515322 |
| tL(CAA)6 | #N/A | #N/A | 30515362 |
| tL(UAA)1 | #N/A | #N/A | 30515089 |
| tL(UAA)2 | #N/A | #N/A | 30515375 |
| tL(UAA)3 | #N/A | #N/A | 30514979 |
| tL(UAA)4 | #N/A | #N/A | 30515017 |
| tL(UAA)5 | #N/A | #N/A | 30515360 |
| tM(CAU)1 | #N/A | #N/A | 30515188 |
| tM(CAU)2 | #N/A | #N/A | 30515145 |
| tM(CAU)3 | #N/A | #N/A | 30515132 |
| tM(CAU)4 | #N/A | #N/A | 30515451 |

|          |      |      |          |
|----------|------|------|----------|
| tN(GUU)1 | #N/A | #N/A | 30514997 |
| tN(GUU)2 | #N/A | #N/A | 30514996 |
| tN(GUU)3 | #N/A | #N/A | 30514978 |
| tN(GUU)4 | #N/A | #N/A | 30515455 |
| tP(AGG)1 | #N/A | #N/A | 30515016 |
| tP(UGG)1 | #N/A | #N/A | 30514992 |
| tP(UGG)2 | #N/A | #N/A | 30515157 |
| tP(UGG)3 | #N/A | #N/A | 30514956 |
| tP(UGG)4 | #N/A | #N/A | 30515413 |
| tP(UGG)5 | #N/A | #N/A | 30515412 |
| tQ(CUG)1 | #N/A | #N/A | 30515296 |
| tQ(UUG)1 | #N/A | #N/A | 30515257 |
| tQ(UUG)3 | #N/A | #N/A | 30515118 |
| tQ(UUG)4 | #N/A | #N/A | 30515271 |
| tQ(UUG)5 | #N/A | #N/A | 30515270 |
| tR(ACG)1 | #N/A | #N/A | 30515408 |
| tR(ACG)2 | #N/A | #N/A | 30515407 |
| tR(CCG)1 | #N/A | #N/A | 30514970 |
| tR(CCU)1 | #N/A | #N/A | 30515177 |
| tR(UCU)1 | #N/A | #N/A | 30515192 |
| tR(UCU)2 | #N/A | #N/A | 30515102 |
| tR(UCU)3 | #N/A | #N/A | 30515106 |
| tR(UCU)4 | #N/A | #N/A | 30514971 |
| tR(UCU)5 | #N/A | #N/A | 30515223 |
| tS(AGA)1 | #N/A | #N/A | 30515416 |
| tS(AGA)2 | #N/A | #N/A | 30515425 |
| tS(AGA)3 | #N/A | #N/A | 30515415 |
| tS(AGA)4 | #N/A | #N/A | 30515126 |
| tS(CAG)1 | #N/A | #N/A | 30515292 |
| tS(CGA)1 | #N/A | #N/A | 30515036 |
| tS(GCU)1 | #N/A | #N/A | 30515398 |
| tS(GCU)2 | #N/A | #N/A | 30515397 |
| tS(UGA)1 | #N/A | #N/A | 30514963 |
| tS(UGA)2 | #N/A | #N/A | 30515279 |
| tS(UGA)3 | #N/A | #N/A | 30515235 |
| tT(AGU)1 | #N/A | #N/A | 30514998 |
| tT(AGU)3 | #N/A | #N/A | 30515369 |
| tT(AGU)4 | #N/A | #N/A | 30515116 |
| tT(AGU)6 | #N/A | #N/A | 30514952 |
| tT(CGU)1 | #N/A | #N/A | 30514983 |
| tT(UGU)1 | #N/A | #N/A | 30515252 |
| tT(UGU)2 | #N/A | #N/A | 30515278 |
| tV(AAC)1 | #N/A | #N/A | 30515094 |
| tV(AAC)2 | #N/A | #N/A | 30515180 |
| tV(AAC)3 | #N/A | #N/A | 30515380 |
| tV(AAC)4 | #N/A | #N/A | 30515414 |
| tV(AAC)5 | #N/A | #N/A | 30515209 |

|             |          |          |          |
|-------------|----------|----------|----------|
| tV(AAC)6    | #N/A     | #N/A     | 30515210 |
| tV(CAC)1    | #N/A     | #N/A     | 30515081 |
| tV(UAC)1    | #N/A     | #N/A     | 30515165 |
| tW(CCA)1    | #N/A     | #N/A     | 30515064 |
| tW(CCA)2    | #N/A     | #N/A     | 30515220 |
| tY(GUA)1    | #N/A     | #N/A     | 30515058 |
| tY(GUA)2    | #N/A     | #N/A     | 30515183 |
| tY(GUA)3    | #N/A     | #N/A     | 30515221 |
| tY(GUA)4    | #N/A     | #N/A     | 30515059 |
| C1_04180W_A | 2166.965 | 9.75E-06 | 3644716  |
| HHT21       | 862.7474 | 1.88E-13 | 3644707  |
| PXP2        | 252.8188 | 0.001772 | 3636558  |
| CDC11       | 247.7979 | 0.001399 | 3647888  |
| C1_13100W_A | 236.3041 | 0.002501 | 30515073 |
| HHT2        | 196.5096 | 2.97E-20 | 3647326  |
| COG4        | 187.9012 | 0.002382 | 3645571  |
| C4_05390W_A | 185.0709 | 0.002463 | 3646951  |
| HGT12       | 174.0884 | 0.002787 | 3638048  |
| ALI1        | 164.6847 | 0.003133 | 3636635  |
| HTA2        | 159.1083 | 2.08E-18 | 3644715  |
| C2_09590C_A | 146.18   | 0.004144 | 3643800  |
| C5_03000C_A | 143.1225 | 0.004052 | 3637818  |
| VMA10       | 139.9069 | 0.004193 | 3645215  |
| C1_03150C_A | 136.7983 | 0.004359 | 30514976 |
| MLC1        | 134.5805 | 0.004499 | 30515387 |
| ECM331      | 128.232  | 0.004985 | 3637731  |
| SAM51       | 116.7657 | 0.005879 | 3641582  |
| CRH11       | 114.1947 | 1.14E-07 | 3637905  |
| HOM6        | 113.0353 | 1.28E-07 | 3636815  |
| HRT2        | 95.64974 | 2.78E-07 | 3635709  |
| C6_00660C_A | 93.70142 | 0.00871  | 3647133  |
| C6_02140W_A | 92.87445 | 0.008826 | 3645886  |
| CDC10       | 92.47391 | 4.25E-07 | 3640947  |
| CR_05210W_A | 92.32608 | 0.00989  | 3648081  |
| HHO1        | 92.23814 | 1.36E-13 | 30515358 |
| TNA1        | 88.14619 | 0.009783 | 3637827  |
| KAR3        | 87.11876 | 0.009742 | 3644078  |
| FGR6-10     | 82.64575 | 0.010573 | 3641770  |
| C3_07540C_A | 81.75328 | 0.010888 | 3638526  |
| C3_02620C_A | 81.31457 | 0.01091  | 3638326  |
| IFE1        | 78.20751 | 0.011505 | 3644778  |
| C7_00240W_A | 72.74629 | 0.013452 | 3637980  |
| TUB4        | 70.21221 | 0.013824 | 3641774  |
| C1_06700W_A | 70.03219 | 2.53E-06 | 3639511  |
| CR_05310W_A | 69.71725 | 0.014095 | 3648125  |
| CR_06380C_A | 66.66372 | 0.014909 | 3648139  |
| HHF1        | 64.58899 | 1.12E-20 | 3644705  |



|             |          |          |          |
|-------------|----------|----------|----------|
| DPM2        | 60.89383 | 0.017394 | 30515325 |
| SOU1        | 59.99438 | 2.43E-09 | 3642799  |
| TUB2        | 59.72865 | 5.71E-12 | 3639329  |
| PGA6        | 57.08214 | 8.47E-06 | 3634774  |
| C6_02180W_A | 56.89437 | 0.019575 | 3645861  |
| C3_01100W_A | 56.63476 | 0.021064 | 3639834  |
| C6_00710W_A | 56.45123 | 0.019908 | 3647073  |
| C3_06730W_A | 55.86659 | 0.021103 | 3638504  |
| LEU2        | 55.71417 | 2.65E-10 | 3638034  |
| LSC1        | 54.87289 | 1.6E-18  | 3640199  |
| GUP1        | 54.67702 | 0.021052 | 3636171  |
| CCN1        | 54.23321 | 0.021174 | 3643735  |
| C6_00400C_A | 53.34345 | 0.021629 | 3646087  |
| ILV5        | 51.4566  | 5.19E-26 | 3644012  |
| C4_02460W_A | 50.27491 | 0.023589 | 3637844  |
| C1_02100W_A | 49.7939  | 0.023822 | 3644578  |
| DDR48       | 49.72886 | 1.42E-17 | 3644061  |
| CWH8        | 49.49135 | 0.025278 | 3644598  |
| C2_10010C_A | 49.35008 | 0.024097 | 3643962  |
| CR_00280C_A | 47.57422 | 0.02565  | 3639719  |
| C3_07840C_A | 47.5734  | 0.025544 | 3647465  |
| C2_06760C_A | 46.351   | 0.027539 | 3648022  |
| YOX1        | 45.25529 | 0.028639 | 3637952  |
| C2_02050C_A | 43.76637 | 3.93E-07 | 3635851  |
| AGM1        | 43.07282 | 3.04E-05 | 3636138  |
| AMO2        | 42.71079 | 1.87E-10 | 3648021  |
| CR_10130W_A | 42.68826 | 0.030188 | 3638970  |
| C3_02140C_A | 42.48132 | 2E-10    | 3636656  |
| C5_02780W_A | 42.33482 | 0.031466 | 3637803  |
| ERG28       | 42.26361 | 0.03075  | 3638833  |
| C7_01750W_A | 41.80063 | 0.03077  | 3637009  |
| C1_11950W_A | 41.75979 | 0.031193 | 3642045  |
| C1_13770C_A | 40.91322 | 0.031648 | 3636139  |
| DPM1        | 40.87069 | 3.32E-05 | 3640700  |
| ARC18       | 40.46986 | 0.032142 | 3644056  |
| C3_06750W_A | 40.46456 | 0.032295 | 30515219 |
| CR_04490C_A | 40.44631 | 0.032511 | 3641013  |
| C7_01100C_A | 39.5801  | 0.033318 | 3637948  |
| C1_10560C_A | 39.17789 | 0.034108 | 3647196  |
| FAD1        | 38.69472 | 0.034429 | 3634930  |
| TUB1        | 38.63581 | 8.44E-17 | 3641930  |
| CDC28       | 38.12393 | 4.78E-05 | 3644838  |
| HHF22       | 37.99188 | 1.25E-18 | 3647327  |
| TEM1        | 36.93082 | 0.037357 | 3636923  |
| ACP12       | 35.888   | 6.1E-05  | 3637361  |
| C1_11990W_A | 35.69336 | 0.041385 | 3642042  |
| C2_02330W_A | 35.18801 | 0.041119 | 3635811  |

|             |          |          |          |
|-------------|----------|----------|----------|
| C7_01830W_A | 34.69877 | 0.041551 | 3637053  |
| CWH43       | 34.69127 | 3.97E-09 | 3640389  |
| HTA1        | 34.42255 | 1.68E-17 | 3645658  |
| C2_06280C_A | 33.82988 | 0.043151 | 3646923  |
| PHA2        | 33.81006 | 0.043065 | 3638346  |
| C2_05720C_A | 32.17936 | 1.08E-08 | 3645574  |
| C2_09960W_A | 31.5906  | 0.047348 | 3643821  |
| PMI1        | 31.42779 | 1.52E-06 | 3643795  |
| SHE3        | 31.36665 | 0.000118 | 3639277  |
| LYS9        | 31.16137 | 5.44E-12 | 3642279  |
| C4_02600C_A | 31.15929 | 0.048596 | 3637912  |
| C1_07920W_A | 31.14546 | 0.048473 | 30515026 |
| PGA38       | 31.12234 | 2.02E-07 | 3637846  |
| C2_05510C_A | 30.70306 | 0.048529 | 3643420  |
| C3_07130W_A | 30.70288 | 0.048468 | 3638440  |
| OST1        | 30.68756 | 0.000126 | 3643657  |
| THR1        | 30.57367 | 0.000128 | 3641572  |
| MET15       | 29.35811 | 6.81E-22 | 3645031  |
| ASH2        | 28.99961 | 0.000175 | 3636445  |
| LEU4        | 28.9904  | 8.07E-08 | 3639339  |
| CHS1        | 28.70319 | 6.15E-11 | 3641364  |
| C1_09060C_A | 28.30326 | 0.000223 | 3634772  |
| ALS4        | 28.20492 | 3.86E-26 | 3647972  |
| C1_03940W_A | 28.18335 | 1.59E-06 | 3646415  |
| SOL3        | 27.81889 | 2.08E-08 | 3646625  |
| C2_09100C_A | 27.66253 | 6.02E-12 | 3644113  |
| ASK1        | 27.62902 | 0.000244 | 3635656  |
| SSR1        | 27.14681 | 5.72E-14 | 3638055  |
| PHR1        | 26.99618 | 4.74E-26 | 3641108  |
| FGR41       | 26.99195 | 0.000541 | 3634839  |
| ERG11       | 26.66072 | 1.6E-11  | 3641571  |
| CR_03000C_A | 26.6311  | 0.000275 | 3642597  |
| CLB4        | 25.94598 | 2.6E-06  | 3643102  |
| C6_02190C_A | 25.75747 | 2.79E-06 | 3645862  |
| C1_03600W_A | 25.70437 | 0.000283 | 3636880  |
| CYT1        | 25.67835 | 1.2E-15  | 3643441  |
| C1_04430C_A | 25.61279 | 0.000317 | 30514986 |
| ATP18       | 25.29403 | 0.000413 | 30515084 |
| C1_06050C_A | 25.13861 | 0.000349 | 30515003 |
| BIO2        | 24.81582 | 0.000402 | 3640106  |
| IDP1        | 24.36888 | 3.88E-12 | 3647474  |
| C1_14320C_A | 24.22961 | 0.000406 | 3643316  |
| CAT1        | 24.0958  | 1.15E-18 | 3639495  |
| SNZ1        | 23.84286 | 2.49E-07 | 3636803  |
| PHO15       | 23.57425 | 3.42E-11 | 3644459  |
| GDH3        | 23.5637  | 3.39E-16 | 3648086  |
| QCR2        | 23.24859 | 1.05E-16 | 3646352  |

|             |          |          |          |
|-------------|----------|----------|----------|
| ATP1        | 23.05777 | 6.08E-25 | 3646134  |
| BGL2        | 22.82861 | 1.41E-21 | 3635691  |
| CDC5        | 22.67828 | 4.73E-13 | 3639281  |
| C2_00180C_A | 22.57644 | 1.57E-08 | 3638905  |
| C2_07140W_A | 22.35038 | 5.46E-12 | 3643508  |
| AMO1        | 22.31737 | 1.88E-06 | 3642994  |
| ATP19       | 21.63119 | 0.000629 | 30515061 |
| C2_07540W_A | 21.17796 | 0.000696 | 3645222  |
| CR_04760C_A | 20.70813 | 1.3E-05  | 3647303  |
| C5_02920W_A | 20.3854  | 0.000769 | 3637751  |
| C1_10170W_A | 20.38223 | 0.099223 | 3634783  |
| PDI1        | 20.26597 | 5.56E-17 | 3641367  |
| CR_06170W_A | 20.25821 | 0.00081  | 3644865  |
| HOF1        | 20.20212 | 2.23E-06 | 3645014  |
| YNK1        | 19.9981  | 1.2E-11  | 3637746  |
| SEC21       | 19.99402 | 1.58E-12 | 3644786  |
| PLC2        | 19.50833 | 5.18E-07 | 3642985  |
| RGD1        | 19.40861 | 4.76E-07 | 3639868  |
| LYS4        | 19.3754  | 5.6E-10  | 3641180  |
| DUR1,2      | 19.32104 | 2.39E-08 | 3644771  |
| RFA2        | 18.96228 | 0.001145 | 3643506  |
| C5_01230C_A | 18.87863 | 3.47E-10 | 3642618  |
| RAD54       | 18.83325 | 0.001113 | 3636192  |
| ERV46       | 18.82375 | 2.67E-05 | 3644129  |
| GND1        | 18.77185 | 8.06E-20 | 3636131  |
| HAT1        | 18.63479 | 2.96E-05 | 3644770  |
| TAL1        | 18.50021 | 1.12E-20 | 3643225  |
| CR_09520C_A | 18.43657 | 2.99E-05 | 3647103  |
| LAT1        | 18.32011 | 2.67E-19 | 3636986  |
| ACO2        | 18.27477 | 9.89E-07 | 3646708  |
| LYS22       | 18.24696 | 2.34E-07 | 3645466  |
| HTA3        | 18.05301 | 2.51E-07 | 3638322  |
| C1_02760W_A | 17.9854  | 2.28E-07 | 3636870  |
| TSA1        | 17.82827 | 1.01E-18 | 3642269  |
| LSC2        | 17.70064 | 1.2E-18  | 3646618  |
| OPI3        | 17.67022 | 0.001386 | 3642277  |
| CR_05500C_A | 17.55805 | 0.001374 | 3647598  |
| CRC1        | 17.52641 | 2.9E-10  | 3640112  |
| C4_01510W_A | 17.50183 | 6.35E-09 | 3635616  |
| AAP1        | 17.47746 | 7.16E-06 | 3647397  |
| DOG1        | 17.44454 | 0.001372 | 3641597  |
| SPE3        | 17.20832 | 1.34E-11 | 3643528  |
| QCR8        | 17.11912 | 4.35E-09 | 30515112 |
| ERG6        | 16.97448 | 5.28E-07 | 3636655  |
| C1_09980C_A | 16.93481 | 4.83E-05 | 3634863  |
| LEU1        | 16.8882  | 3.04E-20 | 3639685  |
| APE3        | 16.87908 | 3.23E-06 | 3643875  |

|             |          |          |          |
|-------------|----------|----------|----------|
| C1_07260C_A | 16.76558 | 0.001534 | 3644456  |
| TSA1B       | 16.66488 | 4.46E-18 | 30515214 |
| C2_03970W_A | 16.53856 | 0.001657 | 3637419  |
| LYS12       | 16.49661 | 1.56E-16 | 3640134  |
| CYB5        | 16.48032 | 6.48E-05 | 3637965  |
| CR_09330C_A | 16.35669 | 5.62E-12 | 3641899  |
| POL30       | 16.32521 | 0.001852 | 3635583  |
| PTP3        | 16.22599 | 2.77E-19 | 3638940  |
| CR_03520C_A | 16.05925 | 1.84E-09 | 3643203  |
| NHP6A       | 15.92446 | 6.08E-16 | 30515244 |
| ERG26       | 15.91254 | 4.16E-06 | 3642803  |
| COX5        | 15.89234 | 2.4E-12  | 3634768  |
| CR_03330W_A | 15.8603  | 0.00197  | 3645095  |
| COF1        | 15.48671 | 8.35E-13 | 30515293 |
| KIP1        | 15.43935 | 0.000102 | 3645261  |
| C4_07080C_A | 15.37895 | 0.000105 | 3642905  |
| C2_06770W_A | 15.28792 | 0.002629 | 3643515  |
| CHO1        | 15.25488 | 3.37E-07 | 3644557  |
| C5_02220C_A | 14.73603 | 0.003297 | 3637760  |
| OSH3        | 14.62775 | 6.66E-09 | 3645368  |
| C2_03020C_A | 14.5568  | 4.6E-16  | 3643019  |
| TOS1        | 14.5508  | 3.8E-16  | 3636566  |
| ATP3        | 14.49465 | 5.12E-16 | 3640387  |
| MDH1-1      | 14.38717 | 1.08E-17 | 3635636  |
| MAL31       | 14.30603 | 0.004245 | 3636420  |
| SWI6        | 14.27584 | 0.003439 | 3634932  |
| FMA1        | 14.2456  | 0.005938 | 3647986  |
| CEX1        | 14.23096 | 7.84E-06 | 3644913  |
| CR_04770C_A | 14.19421 | 0.003748 | 3647302  |
| MSB1        | 14.18702 | 7.19E-07 | 3648218  |
| EAF6        | 14.16685 | 0.003567 | 3646494  |
| ZWF1        | 14.1636  | 1.32E-15 | 3634913  |
| DOA1        | 14.09431 | 6.09E-12 | 3634871  |
| CHT3        | 14.09039 | 6.57E-06 | 3638967  |
| CR_05360C_A | 14.04989 | 0.003659 | 3648033  |
| ACT1        | 14.03461 | 1.09E-19 | 3636195  |
| C6_02560W_A | 14.01154 | 1.29E-08 | 3639205  |
| RFC5        | 13.94967 | 0.003882 | 3638890  |
| GRP1        | 13.89863 | 0.000206 | 3634899  |
| PMT2        | 13.84039 | 4.26E-12 | 3638538  |
| C1_00700W_A | 13.83053 | 0.004184 | 3639330  |
| EMP24       | 13.82541 | 0.000187 | 3647247  |
| SEC23       | 13.77015 | 2.19E-14 | 3641818  |
| C1_01190C_A | 13.627   | 0.000211 | 3640207  |
| SAC1        | 13.60943 | 9.3E-07  | 3634864  |
| C2_06890C_A | 13.59094 | 0.000254 | 3643522  |
| C1_03240W_A | 13.50214 | 1.3E-05  | 3636895  |

|             |          |          |          |
|-------------|----------|----------|----------|
| C6_04100W_A | 13.28715 | 3.18E-09 | 3647836  |
| C3_05290C_A | 13.20606 | 0.000532 | 3635203  |
| C7_00230W_A | 13.15707 | 2.23E-06 | 3637982  |
| CR_03950W_A | 13.14497 | 0.00434  | 3640960  |
| MCR1        | 13.12818 | 4.14E-16 | 3647561  |
| C2_02410W_A | 13.09904 | 8.1E-09  | 3635755  |
| HIS1        | 13.02829 | 5.94E-08 | 3636501  |
| C5_02380W_A | 12.90739 | 9.77E-19 | 3637794  |
| PEX11       | 12.89688 | 7.61E-06 | 3646288  |
| MPS1        | 12.7809  | 0.005754 | 3641888  |
| CHT2        | 12.7762  | 7.99E-11 | 3636523  |
| HSL1        | 12.73627 | 4.89E-09 | 3637810  |
| C2_09040W_A | 12.7085  | 3.14E-07 | 3645792  |
| CMP1        | 12.65437 | 2.79E-07 | 3639328  |
| C1_04200C_A | 12.59167 | 2.06E-05 | 3644718  |
| C1_10310W_A | 12.5335  | 0.005283 | 3634906  |
| CBR1        | 12.50737 | 2.98E-07 | 3646961  |
| ERV25       | 12.42231 | 2.21E-06 | 3642243  |
| BMT4        | 12.39892 | 2.7E-07  | 3639182  |
| CR_09670C_A | 12.39213 | 4.14E-09 | 3647091  |
| C1_12650C_A | 12.35159 | 0.005518 | 3646836  |
| HOM3        | 12.34756 | 9.27E-07 | 3641771  |
| CLB2        | 12.34543 | 1.48E-14 | 3635840  |
| VMA2        | 12.27472 | 1.65E-15 | 3646710  |
| C6_03320W_A | 12.24058 | 3.7E-05  | 3639198  |
| CR_01490C_A | 12.20106 | 2.69E-05 | 30515376 |
| CDC19       | 12.19308 | 1.05E-16 | 3643438  |
| RBT4        | 12.1705  | 2.8E-07  | 3639534  |
| SEC22       | 12.15299 | 0.006984 | 30515391 |
| CR_03470W_A | 12.12504 | 0.005741 | 3643198  |
| PMM1        | 12.0849  | 7.72E-06 | 3636852  |
| C3_01020W_A | 12.07146 | 0.000379 | 3639828  |
| TPO3        | 11.99311 | 7.81E-12 | 3634790  |
| FAA21       | 11.98479 | 1.29E-09 | 3638418  |
| RET2        | 11.93859 | 8E-09    | 3637714  |
| C1_05180C_A | 11.88014 | 0.006248 | 30514990 |
| MIS11       | 11.87681 | 3.06E-16 | 3645732  |
| ACS2        | 11.79416 | 5.84E-15 | 3644710  |
| CDC21       | 11.78596 | 0.006134 | 3643463  |
| CYK3        | 11.74802 | 7.87E-05 | 3639539  |
| C4_00390W_A | 11.71854 | 0.000453 | 3645016  |
| SMC2        | 11.70461 | 4.96E-06 | 3643918  |
| SGA1        | 11.68308 | 5.64E-06 | 3636652  |
| CAR1        | 11.6508  | 1.07E-11 | 3636503  |
| HGT10       | 11.62219 | 2.68E-09 | 3640309  |
| C4_00710W_A | 11.57702 | 0.00048  | 3645750  |
| RPS17B      | 11.5714  | 1.02E-14 | 30515044 |

|             |          |          |          |
|-------------|----------|----------|----------|
| C1_01080W_A | 11.5606  | 0.006833 | 3640173  |
| KTR4        | 11.55985 | 0.006832 | 3646425  |
| C2_00590W_A | 11.55299 | 0.000427 | 3638851  |
| C7_00670C_A | 11.51837 | 6.17E-07 | 3638024  |
| C1_02270C_A | 11.47638 | 3.08E-08 | 3644566  |
| PST2        | 11.46243 | 0.000105 | 3643909  |
| ASE1        | 11.39692 | 0.000139 | 3641729  |
| ECM33       | 11.38635 | 3.59E-16 | 30514977 |
| HNT2        | 11.33394 | 0.007334 | 3642271  |
| ILV6        | 11.30177 | 3.12E-11 | 3635598  |
| ERG13       | 11.17751 | 3.03E-08 | 3641881  |
| ACO1        | 11.15697 | 3.22E-16 | 3642090  |
| ALD5        | 11.14921 | 1.02E-17 | 3643026  |
| CR_09230C_A | 11.14478 | 7.45E-05 | 3641918  |
| HTB1        | 11.08818 | 5.1E-14  | 3645659  |
| C4_01840C_A | 11.08281 | 3.01E-07 | 3635592  |
| C2_05860C_A | 11.03457 | 0.009343 | 3647473  |
| ASR1        | 10.95087 | 3.23E-11 | 3644402  |
| SEP7        | 10.94705 | 7.54E-06 | 3644596  |
| SEC13       | 10.943   | 1.14E-08 | 3638425  |
| ARP3        | 10.93729 | 1.36E-11 | 3643479  |
| MET3        | 10.90997 | 1.55E-14 | 3636132  |
| SEC20       | 10.90382 | 0.00062  | 3639206  |
| ATP2        | 10.87424 | 6.99E-17 | 3645039  |
| C7_01710W_A | 10.87193 | 1.8E-08  | 3637012  |
| HSP12       | 10.8461  | 7.26E-14 | 3643745  |
| CYP1        | 10.84566 | 2.52E-14 | 3636978  |
| CR_07120C_A | 10.83582 | 0.000295 | 3648225  |
| C2_07550W_A | 10.80244 | 4.84E-09 | 3645221  |
| HYR1        | 10.76931 | 0.009029 | 3636226  |
| C2_07010W_A | 10.74807 | 3.49E-07 | 3643535  |
| GIN4        | 10.73045 | 2.51E-06 | 3644543  |
| HET1        | 10.72867 | 6.57E-10 | 3647897  |
| ACB1        | 10.70781 | 2.43E-07 | 30515350 |
| C5_02110W_A | 10.67862 | 3.74E-14 | 3637732  |
| PST3        | 10.67478 | 2.04E-12 | 3648031  |
| HIS5        | 10.64756 | 0.000716 | 3645756  |
| IPP1        | 10.58564 | 3.06E-15 | 3643874  |
| C6_02480W_A | 10.54955 | 7.42E-05 | 3639170  |
| TRX1        | 10.47812 | 1.38E-11 | 3638950  |
| C1_04460C_A | 10.41696 | 6.68E-05 | 3646140  |
| SAR1        | 10.4071  | 3.36E-07 | 3645865  |
| LAP41       | 10.3268  | 3.64E-09 | 3636653  |
| GVP36       | 10.32418 | 2.13E-06 | 3641772  |
| CR_00990W_A | 10.31582 | 0.009371 | 3640425  |
| DBF2        | 10.2279  | 7.72E-08 | 3648101  |
| SPC34       | 10.20197 | 0.009649 | 3641173  |

|             |          |          |          |
|-------------|----------|----------|----------|
| SEC12       | 10.14849 | 4.51E-09 | 3641639  |
| C4_00020W_A | 10.10986 | 5.25E-10 | 3648053  |
| C3_01070C_A | 10.08906 | 0.010531 | 3639832  |
| NUO1        | 9.980297 | 7.5E-07  | 3647100  |
| LYS1        | 9.98023  | 2.91E-08 | 6335429  |
| PDB1        | 9.975561 | 2.23E-13 | 3641186  |
| C1_02500W_A | 9.975442 | 0.010585 | 3636795  |
| MET6        | 9.975231 | 1.12E-14 | 3640084  |
| C1_09020W_A | 9.953088 | 4.62E-06 | 3634917  |
| C4_03290W_A | 9.915437 | 2.05E-09 | 3637887  |
| APM4        | 9.913275 | 0.00013  | 3642297  |
| C1_07590C_A | 9.902728 | 1.78E-05 | 3646673  |
| IDH1        | 9.880403 | 3.74E-15 | 3634893  |
| C5_00080C_A | 9.869909 | 1.67E-07 | 3647886  |
| DUN1        | 9.868424 | 0.000151 | 3636494  |
| HGT3        | 9.862764 | 0.010803 | 3643185  |
| C5_00340W_A | 9.856325 | 6.88E-07 | 3641555  |
| PIL1        | 9.820645 | 7.51E-16 | 3644769  |
| C4_04600C_A | 9.788027 | 0.001163 | 3641156  |
| PDX1        | 9.787909 | 4.3E-13  | 3636128  |
| C1_14060W_A | 9.762363 | 2.62E-10 | 3643344  |
| SEF2        | 9.737164 | 0.001024 | 3647052  |
| C6_01360W_A | 9.663895 | 4.76E-05 | 3641608  |
| C2_09050C_A | 9.658931 | 1.93E-05 | 3645791  |
| C2_07650C_A | 9.651127 | 0.001224 | 3642342  |
| PGA63       | 9.649538 | 7.18E-14 | 3639524  |
| GLO2        | 9.567841 | 1.38E-06 | 3644067  |
| SSH1        | 9.562455 | 1.49E-06 | 3642504  |
| CWH41       | 9.556823 | 4.49E-06 | 3646533  |
| APL4        | 9.525645 | 6.15E-07 | 3642565  |
| SCP1        | 9.523702 | 0.012547 | 3646554  |
| CRD2        | 9.482864 | 0.014065 | 30515234 |
| SER33       | 9.435803 | 6.02E-12 | 3642030  |
| INP51       | 9.414225 | 2.53E-05 | 3643806  |
| OSM2        | 9.40754  | 2.78E-07 | 3636193  |
| SNF5        | 9.367053 | 9E-07    | 3648297  |
| HGT2        | 9.346394 | 1.34E-10 | 3644579  |
| RPL24A      | 9.334271 | 2.41E-14 | 3641174  |
| CDC12       | 9.267449 | 2.11E-08 | 3636809  |
| NRM1        | 9.248632 | 0.001536 | 3639343  |
| IQG1        | 9.233926 | 3.31E-09 | 3637052  |
| PGA45       | 9.230548 | 0.019246 | 3639875  |
| GLT1        | 9.177768 | 3.25E-13 | 3639519  |
| NUC2        | 9.153955 | 1.19E-10 | 3637030  |
| CLC1        | 9.134909 | 1.3E-08  | 3635662  |
| HMG1        | 9.10757  | 1.17E-07 | 3644687  |
| RIP1        | 9.08455  | 1.93E-12 | 3635204  |

|             |          |          |          |
|-------------|----------|----------|----------|
| C5_02210W_A | 9.038274 | 7E-06    | 3637759  |
| CR_08480C_A | 9.031499 | 3.23E-06 | 30515442 |
| SRB1        | 8.991735 | 6.57E-14 | 3647454  |
| C6_03130W_A | 8.983957 | 0.00029  | 30515341 |
| DED81       | 8.833137 | 2.19E-14 | 3646227  |
| ADK1        | 8.832744 | 3.34E-09 | 3644533  |
| C3_03510C_A | 8.814987 | 4.11E-07 | 3638310  |
| CR_07170W_A | 8.79814  | 7.02E-09 | 3645271  |
| ERG10       | 8.793385 | 1.37E-11 | 3648275  |
| C4_04800W_A | 8.781594 | 1.59E-11 | 3641113  |
| C4_04970C_A | 8.770218 | 0.000325 | 30515274 |
| KIP2        | 8.695625 | 0.000235 | 3643954  |
| C5_04950C_A | 8.67548  | 9.29E-06 | 3636422  |
| C6_00930C_A | 8.672617 | 1.56E-07 | 3644032  |
| FRS2        | 8.670156 | 7.75E-11 | 3636824  |
| C2_02260W_A | 8.648824 | 2.98E-06 | 3635778  |
| MNT1        | 8.59365  | 1.32E-13 | 3636585  |
| ATP5        | 8.589924 | 2.17E-14 | 3640521  |
| SEC18       | 8.583426 | 3.93E-11 | 3636208  |
| TOP2        | 8.57883  | 7.59E-07 | 3642777  |
| C1_01800W_A | 8.570027 | 0.0024   | 3645407  |
| C6_00110C_A | 8.561993 | 1.14E-05 | 3647896  |
| EGD1        | 8.560097 | 1.16E-10 | 3645340  |
| CR_04880W_A | 8.539595 | 9.98E-05 | 3647309  |
| FRP2        | 8.505931 | 0.000105 | 3638008  |
| SUB2        | 8.495974 | 7.98E-13 | 3645033  |
| ERV29       | 8.47654  | 1.49E-05 | 3635672  |
| ERP5        | 8.462063 | 0.000131 | 30515046 |
| C4_01460C_A | 8.439097 | 0.002626 | 3635622  |
| C2_02020W_A | 8.405604 | 7.85E-07 | 3635769  |
| BMH1        | 8.351104 | 2.51E-13 | 3636810  |
| NUF2        | 8.330328 | 9.97E-05 | 3642613  |
| MET13       | 8.31746  | 1.45E-07 | 3638382  |
| C6_04280W_A | 8.312369 | 9.65E-07 | 3646279  |
| CR_10440W_A | 8.302457 | 0.023409 | 3638976  |
| C1_13270W_A | 8.276623 | 2.16E-05 | 3636144  |
| RPS15       | 8.261988 | 2.36E-13 | 3635194  |
| TEF2        | 8.260696 | 1.11E-13 | 3646502  |
| LSP1        | 8.248248 | 5.14E-13 | 3648025  |
| C1_11280W_A | 8.225708 | 1.44E-06 | 3644554  |
| MEP1        | 8.179253 | 6.71E-09 | 3636553  |
| EXO1        | 8.142866 | 0.000503 | 3641583  |
| CR_00130C_A | 8.132645 | 1.48E-06 | 3639709  |
| C5_05230C_A | 8.097068 | 1.59E-12 | 3636470  |
| CR_03560W_A | 8.073457 | 0.003847 | 3643217  |
| C5_01960C_A | 8.069524 | 3.25E-08 | 3643738  |
| C7_02520W_A | 8.060107 | 0.026137 | 3636941  |



|             |          |          |          |
|-------------|----------|----------|----------|
| APL2        | 8.044194 | 7.37E-07 | 3638343  |
| TVP18       | 8.004739 | 0.000453 | 3634844  |
| EGD2        | 8.001392 | 2.64E-10 | 3635284  |
| RHB1        | 7.986076 | 0.003596 | 3635232  |
| ARC35       | 7.983354 | 1.06E-05 | 3639823  |
| CSH1        | 7.98235  | 4.58E-08 | 3646427  |
| CAT2        | 7.977744 | 5.45E-12 | 3635659  |
| PDA1        | 7.964682 | 2.49E-13 | 3642902  |
| SOD1        | 7.964237 | 8.92E-05 | 30515248 |
| CR_03270W_A | 7.961393 | 0.000502 | 3645101  |
| CR_10140W_A | 7.956831 | 6.61E-13 | 3638972  |
| C6_00770C_A | 7.938882 | 0.024925 | 3647079  |
| CR_10530W_A | 7.938789 | 0.024768 | 3639042  |
| ADE6        | 7.931815 | 1.81E-12 | 3647304  |
| C2_01260W_A | 7.921272 | 0.003656 | 3638792  |
| MEU1        | 7.917262 | 8.51E-06 | 3645635  |
| CEK1        | 7.914233 | 0.000496 | 3642789  |
| RPP2A       | 7.880257 | 3.16E-09 | 30515439 |
| TRP4        | 7.867648 | 0.004568 | 3642904  |
| C1_12240C_A | 7.858526 | 9.51E-06 | 3642023  |
| ESP1        | 7.852226 | 2.85E-05 | 3640197  |
| C7_02100W_A | 7.833026 | 5.49E-11 | 3637023  |
| C5_03120W_A | 7.825839 | 0.026042 | 3637705  |
| C1_06920C_A | 7.825563 | 0.02591  | 3639525  |
| C2_06610C_A | 7.825287 | 0.026227 | 30515140 |
| ERG2        | 7.817166 | 0.035927 | 3639347  |
| DOT1        | 7.769428 | 2.01E-06 | 3642236  |
| HBR2        | 7.766753 | 9.67E-14 | 3646273  |
| C1_04780C_A | 7.737373 | 0.00013  | 3644774  |
| CDC20       | 7.725812 | 1.27E-05 | 3644057  |
| C2_10200W_A | 7.72461  | 0.026207 | 3643928  |
| C4_06140C_A | 7.712613 | 0.025553 | 3642821  |
| CR_09010C_A | 7.705783 | 1.87E-09 | 3641892  |
| RFA1        | 7.705173 | 1.15E-06 | 3638823  |
| C4_04920W_A | 7.70055  | 0.00013  | 3641172  |
| C7_04000W_A | 7.669293 | 4.31E-05 | 3643114  |
| CUP5        | 7.656331 | 6.7E-08  | 3635174  |
| C5_04550W_A | 7.640674 | 0.000719 | 3636508  |
| QCR7        | 7.636371 | 1.49E-06 | 3639233  |
| C1_02700C_A | 7.6161   | 7.36E-07 | 30514972 |
| SDH12       | 7.588178 | 5.09E-12 | 3642775  |
| SMC1        | 7.520947 | 0.00658  | 3643221  |
| ABG1        | 7.518021 | 1.38E-05 | 3647715  |
| TPD3        | 7.515184 | 1.56E-08 | 3638512  |
| RIC1        | 7.505374 | 0.000753 | 3639331  |
| C1_08040W_A | 7.494531 | 1E-04    | 30515028 |
| C1_04010C_A | 7.489999 | 0.030053 | 3646426  |

|             |          |          |          |
|-------------|----------|----------|----------|
| ARE2        | 7.483729 | 2.17E-08 | 3643526  |
| CHS8        | 7.480968 | 1.87E-11 | 3640532  |
| C3_07880C_A | 7.47514  | 0.028598 | 3647470  |
| C5_05020C_A | 7.455769 | 0.000216 | 3636486  |
| CR_00060C_A | 7.40028  | 1.82E-08 | 3639673  |
| MES1        | 7.397176 | 4.39E-10 | 3636516  |
| AHP2        | 7.382927 | 8.34E-06 | 3636977  |
| POT1        | 7.377204 | 3.62E-08 | 3639707  |
| CR_08610W_A | 7.368315 | 5.59E-05 | 3642109  |
| BUB1        | 7.339932 | 1.2E-06  | 3637922  |
| C4_00910C_A | 7.322281 | 0.000963 | 3635679  |
| ASN1        | 7.318663 | 3.65E-08 | 3645790  |
| C1_02290C_A | 7.315708 | 0.000281 | 3644568  |
| ATP17       | 7.299493 | 2.43E-08 | 30515364 |
| ADE1        | 7.286557 | 6.6E-08  | 3639722  |
| LIP6        | 7.260279 | 0.030829 | 3634890  |
| C1_08800W_A | 7.243593 | 9.49E-06 | 3634791  |
| DAP1        | 7.23259  | 0.001036 | 3641021  |
| C2_05290C_A | 7.2319   | 0.001105 | 3643472  |
| ARC40       | 7.230648 | 1.15E-08 | 3644866  |
| CPY1        | 7.229095 | 4.8E-11  | 3646721  |
| NDH51       | 7.226601 | 3.43E-10 | 3645444  |
| PMT4        | 7.204461 | 3.14E-06 | 3644096  |
| HIS7        | 7.203904 | 1.85E-05 | 3647868  |
| MDH1        | 7.191796 | 2.06E-11 | 3639667  |
| C3_07230W_A | 7.171784 | 1.24E-06 | 3638531  |
| ALS1        | 7.15604  | 1.49E-10 | 3640280  |
| TOS4        | 7.151277 | 2.54E-08 | 3644548  |
| KIP3        | 7.13671  | 0.000556 | 3641716  |
| CR_07110C_A | 7.133871 | 0.005547 | 3648224  |
| PLB5        | 7.119876 | 1.49E-06 | 3640750  |
| C1_11760C_A | 7.105755 | 0.000308 | 3645328  |
| C2_02310W_A | 7.10149  | 1.24E-05 | 3635809  |
| ALG8        | 7.077986 | 0.005088 | 3636562  |
| FGR29       | 7.064609 | 0.000329 | 3641190  |
| AOX1        | 7.063044 | 0.001487 | 3634946  |
| C7_01460C_A | 7.050898 | 0.001072 | 3636958  |
| C3_05280C_A | 7.038504 | 0.000352 | 3635202  |
| C1_10750C_A | 7.015732 | 0.005901 | 30515043 |
| VMA5        | 7.013356 | 5.82E-06 | 3642316  |
| VPS51       | 7.00608  | 0.00119  | 3639242  |
| WH11        | 7.001238 | 7.46E-08 | 30515117 |
| CRN1        | 6.997696 | 7.9E-09  | 3637034  |
| REX3        | 6.996203 | 0.043549 | 3636164  |
| C1_11860W_A | 6.980828 | 5.45E-09 | 3642009  |
| C2_05170W_A | 6.94819  | 3.11E-05 | 3643462  |
| CAS1        | 6.914394 | 0.001175 | 3645324  |

|             |          |          |          |
|-------------|----------|----------|----------|
| CR_01070W_A | 6.883441 | 0.006101 | 3640382  |
| INO1        | 6.869789 | 1.27E-10 | 3638966  |
| C1_12180C_A | 6.868758 | 0.001154 | 3642038  |
| CR_00910W_A | 6.840022 | 6.49E-10 | 30515371 |
| ENA21       | 6.834258 | 4.82E-12 | 3641392  |
| PYC2        | 6.830886 | 7.34E-12 | 3637323  |
| RAD53       | 6.82819  | 0.007698 | 3645633  |
| ZCF5        | 6.824694 | 0.000385 | 3641819  |
| SOD2        | 6.820349 | 1.44E-07 | 3640231  |
| C7_03640C_A | 6.818895 | 0.006536 | 3646223  |
| C1_07510W_A | 6.818855 | 0.006383 | 3646664  |
| C1_10520W_A | 6.807548 | 0.036406 | 3647191  |
| VMA11       | 6.791209 | 0.000372 | 3637054  |
| MYO1        | 6.790893 | 3.42E-06 | 3647248  |
| CDC42       | 6.767214 | 1.45E-05 | 3646488  |
| SKN1        | 6.743155 | 1.68E-07 | 3641755  |
| C6_04320C_A | 6.729441 | 0.279383 | 3646289  |
| C1_14240W_A | 6.728489 | 1.06E-07 | 3643306  |
| FAS2        | 6.718843 | 1.31E-10 | 3635222  |
| DAG7        | 6.713754 | 0.000164 | 3635607  |
| CIT1        | 6.713244 | 1.98E-10 | 3643201  |
| CCC1        | 6.685775 | 1.26E-06 | 3645645  |
| CAM1-1      | 6.675436 | 1.19E-07 | 3646358  |
| C3_01610W_A | 6.662433 | 4.92E-10 | 3636664  |
| C7_00410C_A | 6.652541 | 1.77E-05 | 3638033  |
| C1_02650W_A | 6.643918 | 4.13E-06 | 3636818  |
| VPS1        | 6.630053 | 1.24E-10 | 3642656  |
| RKI1        | 6.623953 | 0.007256 | 3636574  |
| C3_06860C_A | 6.620996 | 9.79E-11 | 3638541  |
| RPL8B       | 6.618596 | 2.91E-11 | 3635198  |
| C1_07820W_A | 6.59552  | 0.001585 | 3640735  |
| CR_05800C_A | 6.590344 | 0.041464 | 3646706  |
| VMA8        | 6.585132 | 8.29E-06 | 3642798  |
| MET14       | 6.584723 | 8.47E-06 | 3641547  |
| POL1        | 6.579488 | 0.000371 | 3635144  |
| GLC3        | 6.560233 | 6.93E-10 | 3639200  |
| CAP4        | 6.49397  | 0.008477 | 3637335  |
| CR_01100C_A | 6.468083 | 0.041663 | 3640378  |
| RTT109      | 6.468083 | 0.041659 | 3639678  |
| PDC11       | 6.458444 | 3.35E-11 | 3642780  |
| C1_00450C_A | 6.442262 | 2.68E-05 | 30514955 |
| C1_12400C_A | 6.440275 | 0.000554 | 3642059  |
| TFS1        | 6.427911 | 3.88E-10 | 3642655  |
| C1_04030W_A | 6.421364 | 0.001912 | 3646428  |
| KGD2        | 6.404568 | 4.79E-11 | 3646036  |
| NIF3        | 6.400499 | 0.000165 | 3646527  |
| C3_00520W_A | 6.364818 | 0.009049 | 3640513  |

|             |          |          |          |
|-------------|----------|----------|----------|
| MDH1-3      | 6.359944 | 3.17E-07 | 3641197  |
| CR_01430W_A | 6.326982 | 0.003105 | 3640138  |
| RAM1        | 6.324815 | 0.010521 | 3647859  |
| C1_05670W_A | 6.316024 | 3.31E-07 | 3639899  |
| GFA1        | 6.300353 | 2.13E-09 | 3636557  |
| DPP2        | 6.300187 | 0.009802 | 3645341  |
| RNR1        | 6.297802 | 3.61E-06 | 3642989  |
| CR_05200C_A | 6.277335 | 0.000807 | 3648080  |
| JEM1        | 6.272742 | 0.011502 | 3643876  |
| CYB2        | 6.26334  | 6.62E-05 | 3636213  |
| PDR17       | 6.258088 | 0.012057 | 3643007  |
| CR_07230W_A | 6.254472 | 2.18E-05 | 3646031  |
| VRG4        | 6.253959 | 3.08E-06 | 3641768  |
| CR_05130C_A | 6.241796 | 0.046355 | 3646401  |
| C4_06460C_A | 6.235314 | 0.010045 | 3642791  |
| BRN1        | 6.232651 | 2.67E-05 | 3641815  |
| SDH2        | 6.220707 | 4.7E-08  | 3646397  |
| SCW11       | 6.205674 | 5.38E-05 | 3636521  |
| PRN4        | 6.204669 | 0.000816 | 3639877  |
| USO5        | 6.180711 | 0.000759 | 3638398  |
| C1_00420W_A | 6.177113 | 2.11E-06 | 3639286  |
| POR1        | 6.158476 | 3.76E-11 | 3644698  |
| ATP4        | 6.156497 | 4.89E-11 | 3643418  |
| ILV2        | 6.142483 | 1.03E-10 | 3636552  |
| CHS2        | 6.140342 | 3.81E-07 | 3641893  |
| STV1        | 6.140194 | 4.41E-08 | 3646070  |
| C3_06920W_A | 6.134032 | 0.0001   | 3638511  |
| C4_02420C_A | 6.12811  | 0.046568 | 3637849  |
| C4_03400W_A | 6.122643 | 0.011896 | 30515256 |
| GDE1        | 6.117566 | 1.28E-07 | 3636505  |
| UGA32       | 6.095861 | 0.002771 | 3639333  |
| C2_05130W_A | 6.054936 | 0.000806 | 3643458  |
| MNS1        | 6.029786 | 1.72E-05 | 3644692  |
| ADH2        | 6.027469 | 9.06E-11 | 3640751  |
| RPL43A      | 5.998833 | 8.56E-12 | 30515319 |
| THR4        | 5.979792 | 4.61E-09 | 3637711  |
| DLD1        | 5.976843 | 1.67E-07 | 3643025  |
| TSC11       | 5.97597  | 0.010592 | 3645267  |
| CR_07460C_A | 5.956264 | 3.46E-05 | 3646049  |
| FRE30       | 5.916825 | 1.09E-06 | 3646025  |
| RAD10       | 5.91511  | 0.003824 | 3639884  |
| ARP1        | 5.91097  | 0.011026 | 3646349  |
| ACC1        | 5.908111 | 2.5E-09  | 3639688  |
| C1_12140W_A | 5.887463 | 0.000677 | 3642050  |
| PEX8        | 5.881603 | 0.001072 | 3647393  |
| C4_00770C_A | 5.877988 | 5.34E-05 | 3645760  |
| C1_02370C_A | 5.870507 | 0.000204 | 3644576  |

|             |          |          |          |
|-------------|----------|----------|----------|
| CR_04730W_A | 5.868274 | 0.003934 | 3647305  |
| TOM20       | 5.849719 | 2.66E-05 | 3636817  |
| C1_02910C_A | 5.84594  | 0.011565 | 3636829  |
| C1_10540C_A | 5.804267 | 0.00155  | 3647193  |
| SMF3        | 5.802754 | 3.58E-06 | 3638852  |
| NPL4        | 5.801837 | 8.04E-05 | 3639820  |
| ILV3        | 5.793283 | 5.86E-09 | 3636428  |
| DPM3        | 5.778946 | 0.012901 | 30515245 |
| CR_01320C_A | 5.775006 | 0.000247 | 3640386  |
| YSA1        | 5.773675 | 7.24E-05 | 3638516  |
| BFR1        | 5.742031 | 1.91E-09 | 3635579  |
| APL5        | 5.740953 | 4.02E-06 | 3638377  |
| C1_01050C_A | 5.733685 | 3.58E-06 | 3640170  |
| CR_02260C_A | 5.731343 | 0.001565 | 3644912  |
| CR_05680C_A | 5.725782 | 0.001985 | 3646684  |
| C6_01750C_A | 5.716154 | 0.012911 | 3641640  |
| INT1        | 5.715845 | 2.91E-09 | 3637761  |
| VCX1        | 5.712592 | 6.56E-05 | 3646508  |
| C6_03330C_A | 5.711887 | 6E-05    | 3639199  |
| C2_08200W_A | 5.697094 | 0.000288 | 3648342  |
| C3_00210C_A | 5.693884 | 0.019586 | 3640560  |
| GLO1        | 5.652079 | 2.98E-07 | 3639312  |
| DPB4        | 5.642266 | 0.005009 | 3638818  |
| C1_08730W_A | 5.641415 | 0.005165 | 3634938  |
| MMD1        | 5.636684 | 2.16E-09 | 30515015 |
| CR_02880W_A | 5.62957  | 0.020545 | 3642584  |
| FRE7        | 5.614624 | 1.22E-06 | 3646024  |
| FTR2        | 5.611899 | 2.55E-05 | 3643303  |
| CPR3        | 5.608074 | 9.53E-07 | 3635812  |
| CDC3        | 5.603376 | 1.92E-09 | 3644719  |
| C1_05490C_A | 5.590814 | 2.49E-05 | 3642507  |
| HXT5        | 5.570556 | 0.000401 | 3643209  |
| C2_05560W_A | 5.551218 | 0.005348 | 3645561  |
| PMT1        | 5.551192 | 7.24E-09 | 3641393  |
| EXG2        | 5.550784 | 0.006349 | 3636816  |
| C4_03770W_A | 5.521975 | 0.014902 | 3645354  |
| PUP2        | 5.50868  | 1.11E-06 | 3646617  |
| AGE3        | 5.507034 | 2.41E-05 | 3644565  |
| SOU2        | 5.498613 | 0.024307 | 3642823  |
| SSA2        | 5.496686 | 1.22E-06 | 3644711  |
| PRS         | 5.474411 | 0.00701  | 3640100  |
| HFL1        | 5.468663 | 0.01639  | 3636883  |
| C3_01420C_A | 5.460972 | 0.00087  | 3636634  |
| C3_04630W_A | 5.450273 | 0.000397 | 3635189  |
| VMA13       | 5.446242 | 2.97E-07 | 30515402 |
| VMA7        | 5.445143 | 0.007207 | 3637332  |
| YCG1        | 5.440339 | 3.71E-05 | 3636639  |

|             |          |          |          |
|-------------|----------|----------|----------|
| C1_03440C_A | 5.434821 | 7.63E-07 | 3636908  |
| PMT5        | 5.432613 | 0.000736 | 3639011  |
| ERG5        | 5.425501 | 2.97E-09 | 3641400  |
| RPS7A       | 5.425276 | 4.36E-10 | 3636573  |
| ERG24       | 5.419682 | 0.000887 | 3647716  |
| C6_02530C_A | 5.415046 | 0.006807 | 3639175  |
| C2_03210W_A | 5.392003 | 0.017721 | 30515098 |
| SNG3        | 5.391887 | 5.99E-05 | 3646715  |
| MSC7        | 5.373102 | 5.07E-06 | 3645214  |
| C3_02820C_A | 5.365627 | 3.85E-05 | 3638419  |
| C5_04410C_A | 5.357206 | 0.008961 | 3636410  |
| STT3        | 5.355189 | 8.44E-06 | 3635743  |
| C5_01070C_A | 5.299235 | 0.000269 | 3642627  |
| C2_07110C_A | 5.263565 | 0.000874 | 3643505  |
| C6_03050C_A | 5.256979 | 0.022751 | 3639270  |
| MSH6        | 5.252721 | 0.001436 | 3636161  |
| C2_03450W_A | 5.252023 | 0.001741 | 3637349  |
| ZCF24       | 5.251255 | 0.001879 | 3645417  |
| TPI1        | 5.246609 | 7.88E-10 | 3638482  |
| CR_03020C_A | 5.245983 | 8.13E-05 | 3642598  |
| C3_04420W_A | 5.232064 | 1.4E-07  | 3635180  |
| MCM6        | 5.229292 | 0.012392 | 3640142  |
| C7_03200C_A | 5.219319 | 5.13E-05 | 3641342  |
| RAD52       | 5.217558 | 0.001967 | 3647148  |
| C3_05300C_A | 5.216972 | 0.001854 | 3643646  |
| C4_04860W_A | 5.214003 | 0.002121 | 3641161  |
| CR_05760C_A | 5.197588 | 0.02151  | 3646695  |
| RNH1        | 5.184566 | 7.39E-05 | 3639237  |
| C2_02950W_A | 5.176996 | 1.2E-06  | 3643012  |
| FESUR1      | 5.176244 | 9.03E-07 | 3638514  |
| C4_04160W_A | 5.174977 | 1.24E-06 | 3641185  |
| FOX3        | 5.155347 | 1.74E-05 | 3636629  |
| C1_01250W_A | 5.142195 | 3.9E-05  | 3640212  |
| C6_02030C_A | 5.134504 | 4.14E-05 | 3647562  |
| NPT1        | 5.130168 | 1.31E-05 | 3643109  |
| CMK2        | 5.128402 | 1.18E-05 | 3643961  |
| MYO2        | 5.117601 | 5.33E-05 | 3636140  |
| GCF1        | 5.116354 | 1.03E-08 | 3646498  |
| SER1        | 5.096415 | 3.96E-06 | 3646909  |
| FAA2-1      | 5.088345 | 1.76E-05 | 3644100  |
| C4_01470W_A | 5.06838  | 0.025291 | 3635621  |
| C1_02890C_A | 5.067815 | 0.025901 | 3636867  |
| CR_06070W_A | 5.065142 | 0.00012  | 3644840  |
| AHP1        | 5.055044 | 1.57E-07 | 3637850  |
| C1_06480C_A | 5.046364 | 0.00012  | 30515008 |
| C6_03950C_A | 5.045722 | 0.002695 | 3640268  |
| PGA10       | 5.042936 | 0.028227 | 3645009  |

|             |          |          |          |
|-------------|----------|----------|----------|
| C1_02970W_A | 5.026444 | 1.02E-06 | 3636835  |
| PET9        | 5.020347 | 3.25E-08 | 3641587  |
| BNR1        | 5.009566 | 0.000381 | 3639672  |
| GLO3        | 5.006096 | 7.55E-08 | 3640556  |
| FAA2-3      | 5.005764 | 8.47E-05 | 3643125  |
| DSL1        | 5.005491 | 0.007357 | 3645718  |
| C1_01290C_A | 5.002782 | 0.027532 | 3640184  |
| C5_01410C_A | 4.99555  | 3.92E-05 | 3647054  |
| DNM1        | 4.984823 | 3.75E-08 | 3643673  |
| C6_01560W_A | 4.976411 | 0.003213 | 3641652  |
| C1_08080C_A | 4.959854 | 0.000221 | 30515029 |
| C1_12880C_A | 4.945698 | 0.000156 | 3636151  |
| CR_01080W_A | 4.939913 | 3.48E-06 | 3640381  |
| LRO1        | 4.935507 | 5.12E-07 | 3639356  |
| YPT31       | 4.92626  | 9.12E-06 | 3647999  |
| PFY1        | 4.923416 | 9.43E-08 | 3640703  |
| VPS23       | 4.915276 | 0.00813  | 3644401  |
| PRD1        | 4.914413 | 7.06E-08 | 3642471  |
| C1_01010W_A | 4.906541 | 6.9E-05  | 3640181  |
| ARP2        | 4.902807 | 1.62E-07 | 3641915  |
| MTS1        | 4.887412 | 1.87E-06 | 3634873  |
| TYR1        | 4.883943 | 0.000482 | 3635639  |
| C2_07440C_A | 4.879539 | 0.000127 | 3645200  |
| C3_05880C_A | 4.878534 | 2.77E-06 | 3641737  |
| C3_02210C_A | 4.872615 | 0.000497 | 3636641  |
| CSP37       | 4.87006  | 2.95E-08 | 3640098  |
| UBA2        | 4.866982 | 0.000637 | 3640701  |
| C1_05320C_A | 4.866522 | 0.001418 | 3642470  |
| C3_01900C_A | 4.860323 | 0.000943 | 3636559  |
| ECI1        | 4.858585 | 4.99E-05 | 3642128  |
| CR_04870C_A | 4.856664 | 0.039929 | 3647310  |
| IFD6        | 4.836424 | 0.001684 | 3644703  |
| C7_00600C_A | 4.83245  | 0.003074 | 3638031  |
| SEC8        | 4.830078 | 9.23E-05 | 3647078  |
| C1_11740W_A | 4.824213 | 0.009624 | 3645317  |
| C2_01320W_A | 4.819669 | 0.00015  | 3638846  |
| C1_03720C_A | 4.818129 | 0.000108 | 3648216  |
| C3_00850C_A | 4.815724 | 7.79E-09 | 3647748  |
| C1_02330C_A | 4.803879 | 5.72E-07 | 30514969 |
| C3_04080W_A | 4.79482  | 6.74E-07 | 30515200 |
| GRS1        | 4.793975 | 8.39E-10 | 3642474  |
| TRP99       | 4.789115 | 7.35E-05 | 3642494  |
| MAL2        | 4.787553 | 0.000463 | 3638946  |
| C7_00150W_A | 4.784335 | 5.07E-08 | 3637973  |
| RTS1        | 4.769769 | 5.69E-08 | 3646557  |
| C4_05790W_A | 4.767678 | 0.000939 | 3641784  |
| C6_03960W_A | 4.758172 | 3.71E-08 | 3640269  |

|             |          |          |          |
|-------------|----------|----------|----------|
| GLR1        | 4.756128 | 1.46E-07 | 3647061  |
| ARO9        | 4.752457 | 0.001798 | 3641773  |
| C1_00210C_A | 4.750482 | 8.78E-08 | 3639335  |
| CAT8        | 4.741031 | 0.000446 | 3640745  |
| C4_04090C_A | 4.738215 | 0.000452 | 3641225  |
| C1_07340W_A | 4.721799 | 2.99E-06 | 3644472  |
| ARO3        | 4.712065 | 6.9E-05  | 3635770  |
| ABP1        | 4.704066 | 1.74E-08 | 3637875  |
| KSR1        | 4.692708 | 0.004668 | 3646052  |
| TPM2        | 4.689628 | 1.12E-09 | 30515441 |
| C1_10090C_A | 4.685886 | 1.1E-07  | 3634817  |
| C7_03780C_A | 4.678742 | 0.035372 | 3643119  |
| RCK2        | 4.677816 | 8.23E-09 | 3643507  |
| C2_05850C_A | 4.677589 | 0.000452 | 3647472  |
| C2_10860C_A | 4.655657 | 2.87E-06 | 3641233  |
| CR_00690C_A | 4.638003 | 0.002033 | 3640390  |
| C1_07010W_A | 4.63582  | 0.005512 | 3639537  |
| C1_07440W_A | 4.630952 | 1.47E-05 | 3644482  |
| ARO4        | 4.626754 | 3.83E-06 | 3647668  |
| C1_10730W_A | 4.625811 | 7E-05    | 3644404  |
| C4_00190W_A | 4.614349 | 0.035941 | 3645030  |
| APM1        | 4.614221 | 8.66E-05 | 3636424  |
| CDC14       | 4.604785 | 1.73E-07 | 3647132  |
| C1_00330C_A | 4.601263 | 0.001086 | 3639296  |
| IDH2        | 4.601153 | 8.14E-10 | 3642979  |
| ASR2        | 4.600388 | 6.7E-07  | 3641907  |
| C2_03340W_A | 4.595621 | 0.000506 | 3637392  |
| SNL1        | 4.590616 | 0.000401 | 3647192  |
| AAT1        | 4.586314 | 3.98E-08 | 3643468  |
| PEX6        | 4.586089 | 1.3E-05  | 3643436  |
| ATP14       | 4.584114 | 5.11E-06 | 30515134 |
| RPS12       | 4.58385  | 7.57E-09 | 3638438  |
| IPL1        | 4.57842  | 0.001273 | 3645876  |
| SHP1        | 4.561122 | 6.27E-06 | 3640083  |
| C2_01930C_A | 4.543582 | 1.97E-05 | 3635793  |
| C2_08930W_A | 4.535987 | 5E-05    | 3645795  |
| ARA1        | 4.534344 | 2.5E-05  | 3642331  |
| TRS20       | 4.525319 | 0.044973 | 3640214  |
| C7_01320W_A | 4.521916 | 0.000193 | 3645896  |
| C3_01440C_A | 4.517315 | 0.401033 | 3636632  |
| GSP1        | 4.517022 | 2.24E-09 | 3646925  |
| ACS1        | 4.515386 | 3.56E-08 | 3643941  |
| C3_02570W_A | 4.503259 | 0.000207 | 3638375  |
| CR_02500W_A | 4.498662 | 0.00309  | 3647696  |
| CSR1        | 4.493223 | 0.020391 | 3641162  |
| C1_00630W_A | 4.492052 | 0.003043 | 3639380  |
| CR_05010W_A | 4.487458 | 0.042429 | 3646389  |



|             |          |          |          |
|-------------|----------|----------|----------|
| C1_07990C_A | 4.486226 | 1.02E-07 | 3640697  |
| CAC2        | 4.484445 | 0.039772 | 3646978  |
| C4_06160W_A | 4.484286 | 0.040598 | 3642819  |
| NDE1        | 4.473821 | 1.85E-08 | 3638354  |
| STE24       | 4.467307 | 1.64E-06 | 3645040  |
| MAK32       | 4.460116 | 0.014736 | 3645411  |
| C5_04420W_A | 4.454906 | 0.001578 | 3636411  |
| HXK2        | 4.451651 | 1.01E-06 | 3641015  |
| XUT1        | 4.449896 | 0.000846 | 3642785  |
| C7_00520W_A | 4.448411 | 3.38E-07 | 3638001  |
| CR_02620C_A | 4.443864 | 0.000143 | 3642567  |
| RHO1        | 4.44342  | 9.23E-06 | 3642564  |
| LHS1        | 4.442844 | 0.000117 | 3643032  |
| C6_04120C_A | 4.426831 | 0.000619 | 3647974  |
| C2_10470C_A | 4.422678 | 0.000164 | 3641196  |
| ARP9        | 4.418347 | 0.000785 | 3639829  |
| C3_03270W_A | 4.413936 | 0.041585 | 3638321  |
| CR_03530W_A | 4.405057 | 1.64E-08 | 3643204  |
| C2_06920C_A | 4.381967 | 0.00306  | 3643524  |
| OBPA        | 4.380691 | 2.93E-07 | 3643764  |
| GRE3        | 4.368451 | 3.71E-07 | 3637811  |
| MNN26       | 4.364347 | 0.000153 | 3646240  |
| C4_01730C_A | 4.362519 | 7.05E-05 | 3635588  |
| C4_00380W_A | 4.354827 | 0.003258 | 3645015  |
| END3        | 4.353582 | 0.000686 | 3636644  |
| C6_01420C_A | 4.348461 | 2.69E-06 | 3641602  |
| C2_00730C_A | 4.342922 | 0.00092  | 3638913  |
| COX6        | 4.311949 | 2.82E-08 | 30515099 |
| SAC6        | 4.305262 | 1.04E-07 | 3639213  |
| COQ3        | 4.299399 | 0.000705 | 3641630  |
| C2_07980W_A | 4.29739  | 0.002985 | 3642312  |
| C2_07420W_A | 4.289359 | 0.00206  | 3645202  |
| DUT1        | 4.284268 | 0.018928 | 3640188  |
| C4_04140W_A | 4.282011 | 0.011843 | 3641220  |
| PEX1        | 4.257856 | 2.9E-05  | 3636943  |
| C2_09970C_A | 4.253372 | 6.82E-06 | 3643820  |
| GEA2        | 4.250071 | 7.45E-05 | 3636646  |
| IFR2        | 4.242577 | 9.95E-07 | 3645100  |
| CR_09570W_A | 4.240312 | 0.018676 | 3647098  |
| CR_05880W_A | 4.237565 | 0.009458 | 3646702  |
| SHM1        | 4.235374 | 4.25E-07 | 3646724  |
| PHB1        | 4.219669 | 4.65E-05 | 3645641  |
| SUR7        | 4.218936 | 5.93E-08 | 3641610  |
| MNN24       | 4.207759 | 0.000182 | 3638789  |
| TFC4        | 4.204738 | 0.000169 | 3638420  |
| HYU1        | 4.204463 | 0.000105 | 3643024  |
| LYS21       | 4.203907 | 3.04E-06 | 3644763  |

|             |          |          |          |
|-------------|----------|----------|----------|
| C1_13320C_A | 4.203619 | 3.39E-06 | 3636149  |
| CR_05900W_A | 4.202481 | 0.009643 | 3646681  |
| CYS4        | 4.182591 | 1.93E-06 | 3645429  |
| RPS8A       | 4.176155 | 1.82E-07 | 3645565  |
| ANB1        | 4.175762 | 1.2E-07  | 3641648  |
| C4_02400C_A | 4.172961 | 0.021573 | 3637851  |
| RPP1A       | 4.168832 | 7.73E-07 | 3636839  |
| C4_06810C_A | 4.166427 | 7.4E-05  | 3642916  |
| ARL3        | 4.165897 | 0.000916 | 3644397  |
| YCP4        | 4.150023 | 3.66E-07 | 3648032  |
| SPF1        | 4.12357  | 2.36E-05 | 3646573  |
| SUN41       | 4.122526 | 3.27E-07 | 3647067  |
| C2_09560C_A | 4.099057 | 0.00015  | 3643813  |
| C5_05200C_A | 4.09829  | 0.003876 | 3636467  |
| ATP7        | 4.097686 | 0.000392 | 3646672  |
| C2_06950C_A | 4.09697  | 0.018401 | 3643527  |
| C5_01550C_A | 4.093292 | 1.14E-06 | 3647063  |
| C1_02780W_A | 4.090323 | 0.000216 | 3636871  |
| FUM12       | 4.075597 | 3.83E-07 | 3638489  |
| C3_01510W_A | 4.073814 | 0.002738 | 3636571  |
| SMC4        | 4.067979 | 4.71E-06 | 3641578  |
| C3_01590W_A | 4.066357 | 0.012157 | 3636666  |
| MNN2        | 4.060072 | 0.000918 | 3644405  |
| C3_04810C_A | 4.056738 | 9.88E-08 | 30515205 |
| NAM2        | 4.054828 | 0.001953 | 3640275  |
| LIP8        | 4.052459 | 0.003164 | 3646727  |
| C6_02470W_A | 4.052064 | 0.00021  | 3639169  |
| CR_06770C_A | 4.041355 | 0.004406 | 3647313  |
| C4_06940C_A | 4.040864 | 0.004515 | 3642928  |
| CR_07780W_A | 4.040415 | 3.82E-05 | 3647352  |
| PAN3        | 4.039926 | 2.29E-05 | 3636464  |
| C1_01210W_A | 4.033945 | 0.013063 | 3640209  |
| C2_07270W_A | 4.033689 | 0.00339  | 3643474  |
| SAH1        | 4.033283 | 4E-07    | 3636452  |
| CR_07350W_A | 4.022807 | 4.21E-06 | 3646055  |
| YBN5        | 4.019142 | 5.39E-07 | 3644781  |
| PGA14       | 4.011755 | 4.92E-08 | 3641560  |
| C6_01050W_A | 4.000316 | 0.001088 | 3644015  |
| CR_02680W_A | 3.984732 | 0.004817 | 3642573  |
| RPS1        | 3.984499 | 6.74E-07 | 3636924  |
| LAG1        | 3.984384 | 0.004717 | 3640383  |
| RPL18       | 3.979595 | 2.7E-07  | 3635156  |
| ALS2        | 3.964829 | 1.79E-06 | 3645724  |
| MPT5        | 3.964565 | 0.000394 | 3636205  |
| C3_00790W_A | 3.962777 | 0.003973 | 3648186  |
| RAD51       | 3.961649 | 0.000167 | 3644944  |
| HEM14       | 3.960744 | 0.001175 | 3634923  |

|             |          |          |          |
|-------------|----------|----------|----------|
| C3_06410C_A | 3.960306 | 0.021888 | 3642261  |
| CTP1        | 3.960235 | 0.02257  | 3635141  |
| C7_01740C_A | 3.957879 | 0.011399 | 3637010  |
| C2_08650W_A | 3.95152  | 0.000335 | 3643908  |
| GCV1        | 3.951309 | 0.000164 | 3639172  |
| YPD1        | 3.951101 | 0.00011  | 3644458  |
| GTT11       | 3.943492 | 0.000474 | 3645644  |
| CR_08900C_A | 3.940475 | 0.000212 | 3641908  |
| HGT1        | 3.939947 | 2.64E-06 | 3645420  |
| C2_01690W_A | 3.936957 | 5.98E-05 | 3635728  |
| C4_05810W_A | 3.927903 | 5.99E-07 | 3641786  |
| RPL19A      | 3.923047 | 6.3E-07  | 3635257  |
| MUQ1        | 3.907762 | 0.000123 | 3638898  |
| CR_01180W_A | 3.902384 | 0.001331 | 3640427  |
| HEM15       | 3.901109 | 2.14E-06 | 3645211  |
| ALG6        | 3.899134 | 0.005546 | 3647316  |
| C4_02620C_A | 3.89676  | 2.2E-06  | 3637834  |
| MVB12       | 3.894104 | 0.013322 | 30515400 |
| CDC7        | 3.883575 | 0.003607 | 3643424  |
| TFP1        | 3.882453 | 3.22E-07 | 3636662  |
| C3_07140C_A | 3.873528 | 0.006462 | 3638439  |
| GOA1        | 3.86977  | 0.024196 | 3641153  |
| RFC2        | 3.869587 | 0.024429 | 3637939  |
| RPL10A      | 3.869253 | 5.19E-07 | 3645868  |
| ERG9        | 3.869122 | 0.000161 | 3643913  |
| C6_00910C_A | 3.866852 | 5.8E-06  | 3644030  |
| SEC27       | 3.866666 | 2E-06    | 3645870  |
| CR_08450C_A | 3.86336  | 0.006153 | 3642133  |
| GDB1        | 3.863021 | 4.8E-07  | 3647409  |
| CDC50       | 3.837507 | 0.001414 | 3640302  |
| STE13       | 3.835971 | 0.004669 | 3647597  |
| PLD1        | 3.830172 | 4.59E-07 | 3645329  |
| MUM2        | 3.830155 | 0.000357 | 3636432  |
| ETR1        | 3.829265 | 1.51E-07 | 3640561  |
| C3_04460W_A | 3.828703 | 0.000206 | 3635208  |
| CDC73       | 3.828481 | 0.000228 | 3636830  |
| C4_04230W_A | 3.822463 | 0.028248 | 3646857  |
| C7_02080W_A | 3.819103 | 0.013938 | 3637025  |
| RIM1        | 3.816919 | 0.000502 | 3639898  |
| C5_01590W_A | 3.813729 | 0.015388 | 3647041  |
| CR_02690W_A | 3.813505 | 0.007806 | 3642574  |
| RPP1B       | 3.8098   | 0.000187 | 3643104  |
| C6_03620C_A | 3.790273 | 0.000291 | 3640297  |
| SPC3        | 3.782649 | 0.01352  | 3636121  |
| C1_10460W_A | 3.781307 | 0.000237 | 3647183  |
| CR_01700C_A | 3.781128 | 0.000391 | 3640129  |
| SHM2        | 3.777157 | 4.73E-07 | 3640306  |

|             |          |          |          |
|-------------|----------|----------|----------|
| RPS26A      | 3.775835 | 5.14E-07 | 3635787  |
| C2_03290W_A | 3.768041 | 0.002944 | 3637429  |
| ADO1        | 3.760542 | 6.93E-05 | 3639274  |
| C4_04440W_A | 3.758488 | 0.001593 | 3641177  |
| ORC3        | 3.758406 | 0.001571 | 3645639  |
| C2_01160W_A | 3.756832 | 0.008106 | 3638861  |
| FBA1        | 3.756218 | 2.01E-06 | 3635585  |
| KAR2        | 3.753245 | 2.07E-06 | 3638830  |
| RPL28       | 3.750818 | 3.57E-07 | 30515386 |
| ERV1        | 3.748015 | 0.014649 | 30515385 |
| C1_05990C_A | 3.747972 | 0.014911 | 3639871  |
| CR_01280C_A | 3.747556 | 0.015513 | 3640400  |
| STP1        | 3.740921 | 0.000555 | 3635152  |
| XKS1        | 3.733274 | 1.31E-07 | 3648306  |
| SFH5        | 3.732854 | 0.004319 | 3634884  |
| EFB1        | 3.730971 | 1.02E-06 | 3641125  |
| MRP8        | 3.729068 | 0.009682 | 3641178  |
| MON2        | 3.727079 | 0.000201 | 3636201  |
| CR_09590W_A | 3.726721 | 0.003141 | 3647095  |
| GWT1        | 3.726334 | 0.003449 | 3645575  |
| SPE1        | 3.72281  | 1.84E-05 | 3639327  |
| MAM33       | 3.713949 | 0.000103 | 3643103  |
| C6_02410W_A | 3.712931 | 4.96E-05 | 3645884  |
| FLC2        | 3.708819 | 2.72E-06 | 3647962  |
| ECM39       | 3.706305 | 0.003783 | 3641386  |
| RPS16A      | 3.704572 | 3.38E-07 | 30514974 |
| C6_02160W_A | 3.700408 | 0.010371 | 3645889  |
| PGA33       | 3.698465 | 0.002363 | 3637350  |
| MCI4        | 3.696198 | 0.000587 | 3640118  |
| CTA2        | 3.69464  | 0.000358 | 3639372  |
| COX4        | 3.682752 | 3.52E-06 | 3635737  |
| CDC24       | 3.660835 | 7.37E-05 | 3643737  |
| TLO9        | 3.657805 | 0.000566 | 3648051  |
| ADE5,7      | 3.654069 | 1.8E-06  | 3640719  |
| RNA1        | 3.652082 | 2.18E-05 | 3636595  |
| RAD7        | 3.645627 | 0.001476 | 3635833  |
| CSO99       | 3.642974 | 0.01967  | 3642786  |
| CR_02770C_A | 3.625939 | 0.002443 | 3642581  |
| CHS6        | 3.625685 | 0.002427 | 3641377  |
| C7_03410C_A | 3.624226 | 0.011    | 3646716  |
| OCA1        | 3.614858 | 0.012246 | 3643929  |
| C3_04970C_A | 3.612411 | 0.000403 | 3635164  |
| RPL17B      | 3.60915  | 9.88E-07 | 3645439  |
| C5_05350W_A | 3.608596 | 0.019559 | 3636401  |
| C1_03410W_A | 3.608216 | 0.018496 | 3636905  |
| FCY2        | 3.608123 | 0.00272  | 3638365  |
| CR_07640C_A | 3.596799 | 0.040951 | 3647258  |

|             |          |          |          |
|-------------|----------|----------|----------|
| C7_04280C_A | 3.595174 | 0.000325 | 3643173  |
| C2_05800C_A | 3.59007  | 0.000574 | 3645584  |
| TIP1        | 3.586837 | 0.012678 | 3636512  |
| HPD1        | 3.579506 | 0.022397 | 3639239  |
| AYR1        | 3.558078 | 0.013359 | 3647754  |
| PKH2        | 3.55718  | 4.92E-06 | 3642058  |
| CR_08000C_A | 3.553824 | 4.72E-06 | 3644150  |
| MED1        | 3.546507 | 0.00164  | 3637418  |
| IST2        | 3.545615 | 5.9E-05  | 3646662  |
| CR_08920W_A | 3.54413  | 0.001748 | 3641911  |
| C2_00880W_A | 3.54026  | 0.003909 | 3638897  |
| CR_08670C_A | 3.538343 | 0.020608 | 3642126  |
| C4_02720C_A | 3.53828  | 0.000329 | 3637857  |
| C5_01440C_A | 3.538074 | 0.020382 | 3647043  |
| C3_04590W_A | 3.53289  | 0.000153 | 30515204 |
| C1_07690C_A | 3.530206 | 7.81E-05 | 3641767  |
| C5_01420W_A | 3.530033 | 0.004194 | 3647055  |
| RPL20B      | 3.527839 | 4.3E-07  | 3635615  |
| SGT2        | 3.527344 | 1.87E-05 | 3642978  |
| C4_02470C_A | 3.510979 | 0.000184 | 3637869  |
| C4_06240W_A | 3.50104  | 0.01517  | 3642807  |
| C1_07780W_A | 3.497045 | 0.000443 | 3647955  |
| CR_05860W_A | 3.494455 | 0.001249 | 3646703  |
| C1_11120C_A | 3.48669  | 0.000148 | 3644412  |
| C1_07840W_A | 3.485454 | 0.000169 | 3640737  |
| C3_07110W_A | 3.482979 | 0.000768 | 3638442  |
| CBP1        | 3.476388 | 0.000239 | 3641920  |
| C5_04770W_A | 3.476028 | 0.006288 | 3636444  |
| TAF14       | 3.472395 | 1.68E-05 | 3637357  |
| PGA54       | 3.468086 | 0.001325 | 3637929  |
| YHM2        | 3.466713 | 0.000446 | 3647137  |
| PGA53       | 3.46181  | 0.003309 | 3635599  |
| C3_04780C_A | 3.461703 | 0.003545 | 3635214  |
| C3_01140W_A | 3.452684 | 0.00645  | 3639902  |
| GLX3        | 3.448076 | 1.47E-05 | 3638325  |
| PST1        | 3.444442 | 0.000145 | 3643520  |
| CR_05750W_A | 3.438599 | 1.18E-05 | 3646696  |
| SPC98       | 3.437303 | 0.00541  | 3640113  |
| RTA2        | 3.436408 | 5.56E-06 | 3646567  |
| FGR38       | 3.433921 | 0.004427 | 3645412  |
| CR_01300W_A | 3.433149 | 0.002974 | 30515373 |
| APG7        | 3.43141  | 0.021263 | 3646615  |
| CAM1        | 3.429144 | 3.33E-06 | 3641734  |
| SUC1        | 3.423902 | 0.002289 | 3641916  |
| CR_09150W_A | 3.42285  | 0.005321 | 3641880  |
| MNN10       | 3.418541 | 0.003263 | 3644997  |
| SMC5        | 3.404166 | 0.042486 | 3645103  |

|             |          |          |          |
|-------------|----------|----------|----------|
| POL3        | 3.403139 | 0.000665 | 3641359  |
| C5_00280C_A | 3.400455 | 0.0032   | 3641581  |
| C3_03560W_A | 3.398038 | 0.006437 | 3638299  |
| DQD1        | 3.39686  | 0.006117 | 3643488  |
| C1_01910W_A | 3.39646  | 0.000487 | 3645425  |
| PTC6        | 3.396214 | 0.004546 | 3647351  |
| C1_02440C_A | 3.395914 | 0.020077 | 3636848  |
| C2_05220C_A | 3.391038 | 0.000394 | 3643466  |
| C2_09780C_A | 3.387166 | 0.00371  | 3643805  |
| C1_04090C_A | 3.364436 | 0.030022 | 3644697  |
| C5_05040W_A | 3.363441 | 0.028084 | 3636488  |
| ARG2        | 3.363339 | 0.029393 | 3647533  |
| FAS1        | 3.362742 | 3.84E-05 | 3641593  |
| GPX3        | 3.362608 | 0.029294 | 3644471  |
| C2_07100W_A | 3.360494 | 0.000414 | 3643504  |
| C4_05080C_A | 3.359366 | 0.01892  | 3641129  |
| C4_00590C_A | 3.359325 | 2.72E-05 | 3645772  |
| RPN7        | 3.355918 | 6.16E-06 | 3641909  |
| CR_02410W_A | 3.351883 | 0.00424  | 3644928  |
| C1_03490W_A | 3.351363 | 0.004223 | 3636914  |
| SEC34       | 3.350795 | 0.000628 | 3644455  |
| CR_07700W_A | 3.34906  | 0.002926 | 3648195  |
| C3_01910C_A | 3.34821  | 0.000723 | 30515182 |
| RHD1        | 3.347783 | 0.001581 | 3647531  |
| HDA1        | 3.346321 | 0.000268 | 3640154  |
| ACE2        | 3.338907 | 0.000371 | 3646034  |
| RIB5        | 3.336063 | 0.000869 | 3636499  |
| CR_04020C_A | 3.332152 | 0.00848  | 3640969  |
| CR_04500C_A | 3.330921 | 0.014974 | 3641014  |
| C5_03950W_A | 3.330749 | 0.019255 | 3647445  |
| C3_01310W_A | 3.319964 | 0.031548 | 3636620  |
| NUP159      | 3.313424 | 1.18E-05 | 3647458  |
| C3_06350W_A | 3.309086 | 0.000893 | 30515215 |
| C1_02430C_A | 3.307588 | 0.000458 | 3636846  |
| C6_01460C_A | 3.302812 | 0.021252 | 3641623  |
| TOM22       | 3.300819 | 0.004397 | 3647650  |
| FAT1        | 3.29866  | 0.000186 | 3647083  |
| C5_02400W_A | 3.297771 | 0.000838 | 3637724  |
| SEC26       | 3.294189 | 2.18E-06 | 3641005  |
| SSB1        | 3.293691 | 1.74E-05 | 3642095  |
| C6_01370W_A | 3.291898 | 0.002564 | 3641607  |
| GNA1        | 3.284766 | 0.010695 | 3637397  |
| CDC68       | 3.284272 | 1.25E-05 | 3642787  |
| C5_05440C_A | 3.283277 | 7.76E-05 | 3636431  |
| RBK1        | 3.281855 | 0.003249 | 3646830  |
| SEC24       | 3.280379 | 5.53E-06 | 3634939  |
| SEC10       | 3.279974 | 7.51E-06 | 3642961  |

|             |          |          |          |
|-------------|----------|----------|----------|
| FUM11       | 3.271822 | 0.000205 | 3641016  |
| IFA21       | 3.270178 | 0.03628  | 3641344  |
| C3_07460W_A | 3.26509  | 0.001203 | 3638480  |
| SEC3        | 3.259934 | 0.00027  | 3642806  |
| CR_05480W_A | 3.257999 | 7.22E-05 | 3648238  |
| C3_03340C_A | 3.25545  | 0.007212 | 30515195 |
| RPS14B      | 3.255128 | 1.19E-06 | 30515006 |
| GIN1        | 3.247316 | 0.042307 | 3644539  |
| C4_06710W_A | 3.245507 | 0.020348 | 3642948  |
| C2_00870W_A | 3.244994 | 0.0209   | 3638804  |
| C2_09930W_A | 3.243148 | 0.001683 | 3643824  |
| KRE5        | 3.242833 | 0.001032 | 3638384  |
| CR_09510C_A | 3.234259 | 0.000943 | 3647105  |
| C5_02900W_A | 3.234096 | 0.001424 | 3637747  |
| RHO3        | 3.230005 | 0.009129 | 3643448  |
| C1_01490W_A | 3.229585 | 3.02E-05 | 3640226  |
| C1_11920W_A | 3.226229 | 0.001905 | 3642003  |
| YPT72       | 3.226025 | 0.006322 | 3643523  |
| CR_07600W_A | 3.223533 | 0.005872 | 3644849  |
| PKH3        | 3.219103 | 0.000224 | 3646075  |
| C4_01830C_A | 3.216966 | 0.001331 | 3635593  |
| C1_01000C_A | 3.216541 | 0.021287 | 3640180  |
| C2_08160C_A | 3.21359  | 0.000313 | 30515152 |
| C7_01480W_A | 3.212716 | 0.01227  | 3636956  |
| STE23       | 3.210106 | 0.000633 | 3639236  |
| C3_01940C_A | 3.207247 | 0.005735 | 3636600  |
| C6_03040C_A | 3.207049 | 0.006227 | 3639269  |
| NIT3        | 3.204857 | 0.003849 | 3644408  |
| RAD16       | 3.201873 | 0.000256 | 3636874  |
| C6_04250W_A | 3.200743 | 1.4E-05  | 30515345 |
| PHM7        | 3.199355 | 2.18E-05 | 3642329  |
| MNN21       | 3.199315 | 0.00063  | 3648124  |
| C1_08780W_A | 3.198036 | 0.000425 | 3634789  |
| LAP3        | 3.195651 | 0.001323 | 3641012  |
| C3_05550C_A | 3.188671 | 0.004342 | 3643659  |
| GYP1        | 3.186341 | 0.000448 | 3641138  |
| PPE1        | 3.184616 | 0.036072 | 3635802  |
| C5_02750C_A | 3.180285 | 0.000931 | 3637740  |
| ERG8        | 3.17855  | 0.000891 | 3635640  |
| C7_03660C_A | 3.175239 | 2.82E-05 | 3646226  |
| MSI3        | 3.171352 | 4.75E-06 | 3639821  |
| FOX2        | 3.167592 | 0.000688 | 3648327  |
| GAT1        | 3.154265 | 0.014147 | 3641794  |
| DAM1        | 3.153382 | 0.004398 | 3634820  |
| C3_05510W_A | 3.153182 | 0.035062 | 3643672  |
| RAP1        | 3.151974 | 0.010699 | 3643945  |
| HGT7        | 3.150341 | 2.73E-05 | 3638876  |

|             |          |          |          |
|-------------|----------|----------|----------|
| RPL6        | 3.148178 | 1.1E-05  | 30514975 |
| HOC1        | 3.142631 | 0.001611 | 3641605  |
| C6_03470W_A | 3.142052 | 0.001034 | 3640253  |
| ARO2        | 3.13832  | 0.001321 | 3648190  |
| COQ5        | 3.137043 | 0.001023 | 3643416  |
| ZCF39       | 3.135291 | 4.43E-06 | 3639037  |
| PEX3        | 3.132599 | 0.005334 | 3644484  |
| LYS2        | 3.13254  | 4.62E-05 | 3636875  |
| C1_02320C_A | 3.131304 | 5.14E-05 | 3644572  |
| BUD7        | 3.128229 | 8.51E-05 | 3647228  |
| TOM70       | 3.128178 | 0.00014  | 3647645  |
| C1_09070W_A | 3.118471 | 0.000492 | 3634773  |
| APN1        | 3.116021 | 0.006554 | 3642263  |
| CR_08050C_A | 3.114194 | 0.000605 | 3644133  |
| PMT6        | 3.113565 | 0.000848 | 3641116  |
| ECM4        | 3.112309 | 5.56E-05 | 3640144  |
| CAR2        | 3.105354 | 7.48E-06 | 3645027  |
| C5_03400C_A | 3.103058 | 0.023593 | 30515308 |
| AGP3        | 3.096279 | 0.000889 | 3641163  |
| TKL1        | 3.095222 | 2.58E-05 | 3640767  |
| C4_03720C_A | 3.090452 | 0.006721 | 3645359  |
| C4_03810W_A | 3.08565  | 0.009402 | 3645350  |
| C4_01910W_A | 3.085545 | 0.008856 | 3635635  |
| C1_14160W_A | 3.085138 | 0.040849 | 3643322  |
| C5_00060C_A | 3.074621 | 0.024467 | 3647889  |
| C6_02490C_A | 3.073178 | 0.008853 | 3639171  |
| SRV2        | 3.072723 | 5.03E-06 | 3640938  |
| PGA52       | 3.064042 | 5.34E-05 | 3647908  |
| C6_00200C_A | 3.062663 | 0.002172 | 3646082  |
| PLC1        | 3.060983 | 0.007898 | 3647860  |
| YMC1        | 3.057785 | 0.007895 | 3644474  |
| EIF4E       | 3.053105 | 0.00011  | 3638981  |
| THS1        | 3.047925 | 6.27E-06 | 3647882  |
| C4_04720W_A | 3.046814 | 0.001862 | 3641137  |
| C2_07080C_A | 3.0464   | 0.025068 | 3643502  |
| C3_00050C_A | 3.044486 | 0.010604 | 3640570  |
| C3_02190C_A | 3.041447 | 0.003491 | 3636642  |
| C4_00410W_A | 3.040345 | 0.010441 | 3645019  |
| RPS30       | 3.039023 | 9.55E-05 | 30515390 |
| RFC1        | 3.031285 | 0.0002   | 3645582  |
| C3_07450C_A | 3.013782 | 0.041534 | 3638481  |
| SWC4        | 3.007539 | 0.00157  | 3639679  |
| C3_01820W_A | 3.000889 | 0.000493 | 3636584  |
| C3_04800C_A | 3.000757 | 0.00419  | 3635216  |
| C3_03840C_A | 2.998388 | 0.006992 | 3645628  |
| C2_02930C_A | 2.99493  | 0.000147 | 3643015  |
| YDC1        | 2.990775 | 0.011376 | 3642962  |



|             |          |          |          |
|-------------|----------|----------|----------|
| C2_00830C_A | 2.987527 | 0.000447 | 3638808  |
| CR_01380W_A | 2.98747  | 0.002323 | 3640131  |
| EBP7        | 2.98468  | 0.008772 | 3642971  |
| IFD3        | 2.980717 | 0.009494 | 3640211  |
| C7_00420C_A | 2.979631 | 0.018154 | 3638032  |
| POX1-3      | 2.979092 | 0.00125  | 3636598  |
| ARC15       | 2.977229 | 0.008168 | 3646043  |
| C2_10700C_A | 2.973869 | 0.003813 | 3641207  |
| ATC1        | 2.968106 | 1.3E-05  | 3639570  |
| GAD1        | 2.967662 | 7.42E-05 | 3645339  |
| C6_04560W_A | 2.96183  | 0.000902 | 3645977  |
| CR_05840W_A | 2.960836 | 0.012245 | 3646704  |
| RPL13       | 2.958736 | 5.09E-05 | 3636841  |
| C1_01360C_A | 2.958527 | 0.000114 | 3640191  |
| SEC62       | 2.954841 | 0.007882 | 3636860  |
| SEC4        | 2.949947 | 0.000169 | 3640119  |
| RPD31       | 2.944649 | 0.000919 | 3638520  |
| C5_04940W_A | 2.943528 | 0.045888 | 3636421  |
| RPL35       | 2.941121 | 2.79E-05 | 30515207 |
| C7_01930C_A | 2.940597 | 0.013406 | 3637027  |
| C1_03430W_A | 2.938848 | 0.006701 | 3636906  |
| C1_06270W_A | 2.936776 | 0.036873 | 3647523  |
| CCP1        | 2.934265 | 0.00012  | 3638350  |
| CR_05450C_A | 2.933039 | 0.032972 | 3648236  |
| C6_03820C_A | 2.929264 | 0.004137 | 3640288  |
| C1_12660W_A | 2.928841 | 0.008668 | 3646835  |
| TOM40       | 2.927655 | 0.000102 | 3636968  |
| ERG251      | 2.92526  | 2.52E-05 | 3635716  |
| CR_07570W_A | 2.921711 | 0.014758 | 3648004  |
| C2_00510W_A | 2.914803 | 0.00489  | 3638868  |
| C4_00330C_A | 2.911686 | 0.002272 | 30515227 |
| ISC1        | 2.908304 | 0.048223 | 3646705  |
| TMA19       | 2.906384 | 4.36E-05 | 3640399  |
| CYC1        | 2.901159 | 0.000422 | 3643937  |
| ENO1        | 2.899775 | 0.000138 | 3646493  |
| HAM1        | 2.894448 | 0.007361 | 3647224  |
| C6_02100W_A | 2.887368 | 0.048454 | 3647554  |
| AQY1        | 2.887315 | 0.000157 | 3642587  |
| C6_04340W_A | 2.880582 | 0.006041 | 3646291  |
| C2_01870C_A | 2.878718 | 0.014503 | 3635836  |
| APT1        | 2.877676 | 0.007648 | 3635842  |
| ATP16       | 2.874053 | 2.33E-05 | 3638963  |
| ERG12       | 2.873917 | 0.012914 | 3634859  |
| ERG4        | 2.869359 | 0.000241 | 3640511  |
| FGR34       | 2.867689 | 0.006254 | 3639033  |
| C5_00610C_A | 2.853747 | 0.032633 | 3641585  |
| ZCF32       | 2.853428 | 0.032702 | 3635213  |

|             |          |          |          |
|-------------|----------|----------|----------|
| IFK2        | 2.853195 | 0.032809 | 3637439  |
| C7_03840W_A | 2.851914 | 0.010364 | 3643146  |
| PEX7        | 2.850533 | 0.003335 | 3644027  |
| CR_04080C_A | 2.850409 | 0.000699 | 3641023  |
| ARC1        | 2.849672 | 0.000131 | 3645108  |
| CR_01820W_A | 2.848108 | 0.002499 | 3640164  |
| APR1        | 2.843008 | 0.000162 | 3645204  |
| TEF1        | 2.836941 | 0.000189 | 3648254  |
| CR_08130W_A | 2.83667  | 0.007815 | 3642070  |
| RFC3        | 2.83633  | 0.113197 | 3647440  |
| YST1        | 2.835917 | 5.22E-05 | 3643678  |
| C1_02490C_A | 2.835408 | 0.008736 | 3636853  |
| DAO1        | 2.82365  | 0.00357  | 3636885  |
| UBA1        | 2.820511 | 6.59E-05 | 3642286  |
| C2_03700W_A | 2.818752 | 0.043155 | 3637375  |
| ILV1        | 2.818003 | 0.001073 | 3646918  |
| SER2        | 2.817567 | 0.011478 | 3643006  |
| TLO1        | 2.813785 | 0.008706 | 3639677  |
| C2_01170C_A | 2.808176 | 0.000526 | 3638860  |
| C2_02840C_A | 2.807479 | 0.005588 | 3642976  |
| C1_10960W_A | 2.805503 | 0.033765 | 30515047 |
| C1_11100W_A | 2.801827 | 0.036974 | 3644414  |
| RDI1        | 2.800146 | 0.000922 | 3635167  |
| GIT2        | 2.796699 | 0.012136 | 3642633  |
| C1_02060W_A | 2.795854 | 0.019758 | 30514968 |
| VPS8        | 2.79577  | 0.01856  | 3640534  |
| C2_06110W_A | 2.786132 | 0.004375 | 3644094  |
| C1_13280C_A | 2.782211 | 0.017214 | 3636145  |
| PMR1        | 2.777085 | 0.002947 | 3638043  |
| C1_13260W_A | 2.776972 | 0.010806 | 30515074 |
| PRO3        | 2.775162 | 0.001367 | 3645036  |
| BET2        | 2.770069 | 0.015385 | 3639025  |
| RPP0        | 2.769389 | 0.000182 | 3638023  |
| C3_03410C_A | 2.768918 | 0.000184 | 3638353  |
| CR_08620C_A | 2.763712 | 0.012289 | 3642110  |
| HEM4        | 2.761882 | 0.04741  | 3643942  |
| C3_05410W_A | 2.759297 | 2.72E-05 | 3643665  |
| DLD2        | 2.757432 | 0.035848 | 3638475  |
| CR_04330W_A | 2.754253 | 0.02195  | 3640997  |
| C4_05850C_A | 2.754064 | 0.02447  | 3641791  |
| ADP1        | 2.749013 | 0.000587 | 3642458  |
| GPM1        | 2.748744 | 0.000432 | 3637431  |
| GAL4        | 2.746369 | 0.000209 | 3641244  |
| C4_00320C_A | 2.745743 | 0.019526 | 3644999  |
| HOG1        | 2.735309 | 0.000532 | 3637393  |
| VPS52       | 2.733049 | 0.01221  | 3638996  |
| C5_02050W_A | 2.729699 | 0.000474 | 3643768  |

|             |          |          |          |
|-------------|----------|----------|----------|
| CR_07370W_A | 2.728168 | 0.019734 | 3646053  |
| C1_02240W_A | 2.725256 | 0.001742 | 3644597  |
| ADE2        | 2.722824 | 0.000238 | 3635259  |
| CR_06620W_A | 2.721227 | 0.006695 | 3646631  |
| PRC3        | 2.717393 | 0.004343 | 3639889  |
| CR_04560C_A | 2.717051 | 0.041243 | 3640946  |
| SCL1        | 2.716954 | 0.003106 | 3640510  |
| RCY1        | 2.715111 | 0.027662 | 3643731  |
| PGI1        | 2.713812 | 0.000244 | 3644847  |
| DSE1        | 2.71337  | 0.012841 | 3643899  |
| C1_00320W_A | 2.713013 | 0.02486  | 3639297  |
| CAK1        | 2.709639 | 0.035867 | 3637352  |
| C3_04130W_A | 2.70797  | 0.004188 | 3635283  |
| UAP1        | 2.706645 | 0.001068 | 3637769  |
| WBP1        | 2.703661 | 0.001505 | 3644398  |
| BMT3        | 2.70082  | 0.017191 | 3640439  |
| C3_01720C_A | 2.698087 | 7.31E-05 | 3636601  |
| C7_02170C_A | 2.695104 | 0.00499  | 3636993  |
| GRE2        | 2.691159 | 0.003721 | 3648026  |
| MAC1        | 2.68957  | 0.012876 | 3637985  |
| CDC27       | 2.689253 | 0.013666 | 3640405  |
| C3_01180C_A | 2.689131 | 0.002997 | 3647960  |
| UGA2        | 2.688282 | 0.001506 | 3645436  |
| MED18       | 2.679162 | 0.017108 | 3644103  |
| KGD1        | 2.67906  | 0.000359 | 3647752  |
| SLC1        | 2.67767  | 0.012321 | 3638324  |
| FGR51       | 2.671861 | 0.031979 | 3647796  |
| C4_01020C_A | 2.671045 | 0.000288 | 3635606  |
| CR_09070C_A | 2.666707 | 0.009309 | 3641926  |
| GCN4        | 2.663164 | 0.000147 | 3643823  |
| C6_02940C_A | 2.657709 | 0.003531 | 3639187  |
| C2_01390W_A | 2.65325  | 0.000558 | 3635726  |
| EMP70       | 2.649862 | 0.003268 | 3637919  |
| ANT1        | 2.646778 | 0.00933  | 3639516  |
| CTA7        | 2.646075 | 0.00716  | 3637776  |
| CR_00350W_A | 2.642939 | 0.000626 | 3639686  |
| C2_02090W_A | 2.637886 | 0.039139 | 3635854  |
| C5_03490C_A | 2.634964 | 0.000404 | 3646967  |
| CR_00290W_A | 2.631573 | 0.000832 | 3639717  |
| RIB4        | 2.630679 | 0.001966 | 30514995 |
| LTP1        | 2.627867 | 0.017278 | 3640760  |
| C2_00400C_A | 2.627711 | 0.00082  | 3638821  |
| ERG20       | 2.625046 | 0.003224 | 3645440  |
| C1_10820C_A | 2.621203 | 0.000753 | 3644435  |
| C6_00240C_A | 2.62015  | 0.010754 | 3646062  |
| C6_00920W_A | 2.61894  | 0.008849 | 3644031  |
| RPL37B      | 2.617117 | 5.25E-05 | 30515053 |

|             |          |          |          |
|-------------|----------|----------|----------|
| PHB2        | 2.614797 | 0.002207 | 3635238  |
| C7_02670W_A | 2.6143   | 0.043667 | 3647651  |
| MSH2        | 2.612268 | 0.012465 | 3642939  |
| CR_07840C_A | 2.609149 | 0.009144 | 3647346  |
| URA5        | 2.606397 | 0.019886 | 3640087  |
| CMK1        | 2.604916 | 0.000115 | 3635263  |
| C4_07240W_A | 2.601135 | 0.016936 | 3642945  |
| SUL2        | 2.593367 | 0.006332 | 3637835  |
| C6_00270W_A | 2.587791 | 0.021087 | 3646066  |
| PXA2        | 2.585171 | 0.004887 | 3642055  |
| ATP20       | 2.582773 | 0.009255 | 3647602  |
| POL2        | 2.582469 | 0.027856 | 3645733  |
| C5_01220W_A | 2.582089 | 0.011265 | 3642620  |
| FRS1        | 2.581721 | 0.000642 | 3640121  |
| C2_04370W_A | 2.577269 | 0.003061 | 3645460  |
| VMA4        | 2.575498 | 0.001217 | 3640111  |
| C2_04170C_A | 2.572753 | 0.002465 | 30515111 |
| AKR1        | 2.572469 | 0.001054 | 3636166  |
| C1_06200W_A | 2.571828 | 0.016267 | 3648300  |
| CR_08560C_A | 2.566503 | 0.003646 | 3642142  |
| ALG9        | 2.561417 | 0.013364 | 3644457  |
| RAD32       | 2.560011 | 0.007579 | 3637340  |
| C3_01210C_A | 2.557503 | 0.004972 | 3636612  |
| C2_09650W_A | 2.550852 | 0.003112 | 3643794  |
| C4_05860W_A | 2.547488 | 0.042862 | 3641792  |
| MAE1        | 2.546869 | 9.42E-05 | 3641615  |
| C4_05340W_A | 2.542633 | 0.017101 | 3646947  |
| C3_07480W_A | 2.542426 | 0.005532 | 3638529  |
| LPD1        | 2.54085  | 0.000509 | 3646037  |
| C3_00470W_A | 2.540047 | 0.009617 | 3640520  |
| SLA1        | 2.5343   | 7.49E-05 | 3635739  |
| SAM4        | 2.534065 | 0.004166 | 3646506  |
| VPS35       | 2.533583 | 0.003811 | 3645567  |
| C6_04060W_A | 2.533215 | 0.007957 | 3647828  |
| CR_07080W_A | 2.52969  | 0.001344 | 3647964  |
| URA4        | 2.528743 | 0.009846 | 3642632  |
| PTC7        | 2.528072 | 0.001841 | 3645000  |
| CR_03460W_A | 2.527906 | 0.016198 | 3643213  |
| C7_03160W_A | 2.522651 | 0.005182 | 3641345  |
| C3_07740W_A | 2.520764 | 0.001305 | 3638453  |
| CR_09990W_A | 2.51841  | 0.004691 | 3638930  |
| CYP5        | 2.511092 | 0.000313 | 3642257  |
| DPS1-1      | 2.503563 | 0.000334 | 3645134  |
| SRO77       | 2.499242 | 0.001787 | 3646088  |
| ERG27       | 2.492356 | 0.019348 | 3640432  |
| TRP3        | 2.489628 | 0.027022 | 3642035  |
| YCS4        | 2.488172 | 0.005536 | 3645196  |

|             |          |          |          |
|-------------|----------|----------|----------|
| RPS13       | 2.487588 | 0.000298 | 30515328 |
| C6_00190W_A | 2.487497 | 0.020257 | 3646080  |
| C1_08050W_A | 2.486993 | 0.005854 | 3640709  |
| SEC72       | 2.473863 | 0.027006 | 3645768  |
| C4_00780C_A | 2.471997 | 0.004025 | 3645759  |
| CTA24       | 2.468577 | 0.005869 | 3636475  |
| C1_05900W_A | 2.462711 | 0.001516 | 3639866  |
| CR_09750C_A | 2.462701 | 0.007133 | 3639009  |
| MOB1        | 2.462004 | 0.006959 | 3639208  |
| C1_05720W_A | 2.459185 | 0.000516 | 30515000 |
| C3_06970W_A | 2.454576 | 0.021515 | 3638506  |
| PRE2        | 2.453339 | 0.004691 | 3643490  |
| C1_01900C_A | 2.449031 | 0.012692 | 3645426  |
| EFT2        | 2.446013 | 0.00118  | 3642998  |
| CHC1        | 2.445387 | 0.000576 | 3647552  |
| C1_10320W_A | 2.444357 | 0.045043 | 3634907  |
| GPA2        | 2.44413  | 0.002414 | 3636638  |
| C3_05010C_A | 2.441976 | 0.035125 | 3635169  |
| C1_02830W_A | 2.440717 | 0.02673  | 3636876  |
| C2_03910C_A | 2.440248 | 0.027534 | 3637426  |
| CHS7        | 2.435739 | 0.008459 | 3639869  |
| C4_02160C_A | 2.433909 | 0.006655 | 3635668  |
| C6_02280W_A | 2.425732 | 0.022115 | 3645872  |
| MSK1        | 2.424447 | 0.036804 | 3637032  |
| C2_10460C_A | 2.423413 | 0.006997 | 3641195  |
| ECM15       | 2.418466 | 0.03603  | 30515218 |
| PCK1        | 2.414148 | 0.003601 | 3639701  |
| UBP13       | 2.413794 | 0.00461  | 3638879  |
| C4_04330C_A | 2.412366 | 0.003866 | 3646840  |
| ANP1        | 2.410712 | 0.0283   | 3643917  |
| HOM2        | 2.407474 | 0.001485 | 3635826  |
| NUO2        | 2.40114  | 0.003989 | 3638381  |
| C2_09620W_A | 2.392128 | 0.028412 | 3643797  |
| C5_04900C_A | 2.390086 | 0.022216 | 3636416  |
| C4_01780C_A | 2.384834 | 0.023279 | 3635582  |
| C4_04390W_A | 2.377027 | 0.001206 | 30515267 |
| C6_00890W_A | 2.37389  | 0.005305 | 3644028  |
| SGO1        | 2.373682 | 0.019537 | 3643464  |
| C1_14180W_A | 2.372211 | 0.046566 | 3643324  |
| C1_05390C_A | 2.370838 | 0.008018 | 3642479  |
| LMO1        | 2.361374 | 0.010142 | 3641403  |
| RPL3        | 2.36051  | 0.001015 | 3647719  |
| RPN6        | 2.356105 | 0.007656 | 3645352  |
| GUS1        | 2.353639 | 0.001806 | 3638029  |
| AHA1        | 2.344386 | 0.011901 | 3638933  |
| ENG1        | 2.336935 | 0.016768 | 3636886  |
| SSO2        | 2.330251 | 0.002731 | 3643809  |

|             |          |          |          |
|-------------|----------|----------|----------|
| MRE11       | 2.328273 | 0.021677 | 3645898  |
| C2_03360W_A | 2.327879 | 0.000518 | 3637389  |
| TIP20       | 2.327574 | 0.004103 | 3636457  |
| C1_03690W_A | 2.323247 | 0.011484 | 3648426  |
| ERG7        | 2.322338 | 0.007266 | 3635761  |
| PPH21       | 2.320409 | 0.005638 | 3636665  |
| RAS1        | 2.31933  | 0.00184  | 3643927  |
| URA2        | 2.318638 | 0.001749 | 3645728  |
| MP65        | 2.318085 | 0.001478 | 3643951  |
| C1_07050C_A | 2.31778  | 0.020195 | 3639532  |
| DAK2        | 2.314454 | 0.001546 | 3634895  |
| PNP1        | 2.309622 | 0.009763 | 3638426  |
| C1_10680C_A | 2.309226 | 0.000491 | 3647678  |
| CMD1        | 2.308905 | 0.004148 | 3646520  |
| RPS5        | 2.307373 | 0.001331 | 3637700  |
| GRP2        | 2.301284 | 0.001833 | 3637744  |
| C5_00750C_A | 2.299992 | 0.008819 | 3644121  |
| C3_02120W_A | 2.29482  | 0.011992 | 3636658  |
| C4_04380C_A | 2.290019 | 0.401147 | 30515266 |
| C7_03030W_A | 2.286638 | 0.034137 | 3641380  |
| ADE17       | 2.285796 | 0.001221 | 3641024  |
| RBP1        | 2.280759 | 0.004965 | 3647647  |
| NHX1        | 2.279979 | 0.012989 | 3647141  |
| C1_14500C_A | 2.279778 | 0.002993 | 3643331  |
| C3_03080W_A | 2.27887  | 0.090375 | 3638397  |
| ECM25       | 2.278617 | 0.086712 | 3636148  |
| C6_00560W_A | 2.278332 | 0.006212 | 3647143  |
| RPL2        | 2.276699 | 0.002326 | 30515049 |
| VAS1        | 2.270931 | 0.003787 | 3648340  |
| CCT5        | 2.261564 | 0.002154 | 3643478  |
| NAT2        | 2.25897  | 0.008646 | 3638837  |
| C6_03880W_A | 2.253122 | 0.011141 | 3640293  |
| C5_02230W_A | 2.250861 | 0.001406 | 3637708  |
| RPN8        | 2.245724 | 0.0066   | 3643770  |
| C6_00850W_A | 2.243718 | 0.005154 | 3644010  |
| C3_03760W_A | 2.24261  | 0.021987 | 3645638  |
| C6_00760W_A | 2.24167  | 0.026348 | 3647080  |
| C2_03900C_A | 2.241641 | 0.005028 | 3637395  |
| COQ6        | 2.240348 | 0.009472 | 3636878  |
| ALA1        | 2.239482 | 0.001089 | 3640285  |
| RPL16A      | 2.238254 | 0.002167 | 3639338  |
| FGR24       | 2.237218 | 0.022659 | 3643288  |
| C5_01350W_A | 2.234538 | 0.018241 | 3642640  |
| ARO8        | 2.232214 | 0.005072 | 3638828  |
| CDC55       | 2.231221 | 0.000674 | 3635785  |
| FDH3        | 2.229448 | 0.004507 | 3638923  |
| RPS6A       | 2.227523 | 0.002729 | 3635701  |

|             |          |          |          |
|-------------|----------|----------|----------|
| CR_06570C_A | 2.225811 | 0.003409 | 3648366  |
| MRP2        | 2.224748 | 0.0378   | 3636498  |
| C1_06670W_A | 2.224142 | 0.01085  | 3639541  |
| C7_02370W_A | 2.222388 | 0.013023 | 3636930  |
| URA6        | 2.221733 | 0.007141 | 3647988  |
| C4_03320W_A | 2.221445 | 0.026603 | 3648092  |
| ROB1        | 2.217467 | 0.003767 | 3636212  |
| SAS3        | 2.214652 | 0.029328 | 3640073  |
| C2_01220W_A | 2.213213 | 0.001106 | 3638856  |
| C7_00140C_A | 2.21118  | 0.039088 | 3637974  |
| IDP2        | 2.209254 | 0.010233 | 3644934  |
| COX8        | 2.208662 | 0.011193 | 30515130 |
| AIP2        | 2.206114 | 0.003655 | 3638393  |
| C2_05590C_A | 2.204939 | 0.042491 | 3645564  |
| SWD2        | 2.204668 | 0.044554 | 3646677  |
| NSP1        | 2.201878 | 0.001094 | 3637430  |
| C1_14170W_A | 2.201021 | 0.009282 | 3643323  |
| C2_07190C_A | 2.199038 | 0.02338  | 3643513  |
| C1_00920W_A | 2.198507 | 0.029294 | 3639283  |
| UBI3        | 2.194237 | 0.00386  | 3642934  |
| AAT21       | 2.194103 | 0.000998 | 3647241  |
| NMT1        | 2.19339  | 0.014647 | 3635624  |
| C2_02170W_A | 2.193094 | 0.02702  | 3635751  |
| GCV3        | 2.191493 | 0.005086 | 3636194  |
| GOR1        | 2.18672  | 0.042589 | 3636836  |
| MED17       | 2.182995 | 0.013367 | 3636918  |
| ADE13       | 2.181734 | 0.001107 | 3644863  |
| RPN2        | 2.180574 | 0.000982 | 3642027  |
| C1_08680C_A | 2.179467 | 0.041598 | 3634933  |
| RPN1        | 2.176737 | 0.00109  | 3636147  |
| OXR1        | 2.169169 | 0.025019 | 3638372  |
| SEC14       | 2.168452 | 0.000919 | 3641542  |
| C1_03510C_A | 2.166532 | 0.010656 | 3636916  |
| HEM2        | 2.165182 | 0.024145 | 3637428  |
| C1_11890W_A | 2.164627 | 0.030118 | 3642006  |
| RVB2        | 2.164439 | 0.004533 | 3637055  |
| C7_04310C_A | 2.161578 | 0.038607 | 3643141  |
| C5_01540W_A | 2.160371 | 0.002783 | 30515301 |
| C1_13060C_A | 2.15895  | 0.013049 | 3636123  |
| C3_00890C_A | 2.155623 | 0.04521  | 3647753  |
| YBP1        | 2.151959 | 0.033077 | 3636187  |
| BCY1        | 2.151589 | 0.00072  | 3638832  |
| CR_09620C_A | 2.147973 | 0.031586 | 6335435  |
| SFI1        | 2.144131 | 0.019854 | 3641385  |
| YVC1        | 2.143974 | 0.017868 | 3642303  |
| C5_03550W_A | 2.140723 | 0.001535 | 3646973  |
| C2_08270C_A | 2.140294 | 0.042653 | 3642347  |

|             |          |          |          |
|-------------|----------|----------|----------|
| C3_03930W_A | 2.136925 | 0.030354 | 3645657  |
| C1_08490W_A | 2.135964 | 0.019833 | 3646492  |
| C7_02560W_A | 2.131888 | 0.024135 | 3637016  |
| LTE1        | 2.13116  | 0.021013 | 3643495  |
| SMP2        | 2.129471 | 0.001459 | 3635779  |
| DBP5        | 2.128264 | 0.008379 | 3636564  |
| GUT2        | 2.126708 | 0.004812 | 3642921  |
| RIM20       | 2.124089 | 0.021685 | 3634809  |
| C4_01760W_A | 2.119189 | 0.042973 | 3635584  |
| C1_12830C_A | 2.118145 | 0.010123 | 3636176  |
| C7_00250C_A | 2.117688 | 0.022573 | 3637979  |
| USO1        | 2.117252 | 0.011309 | 3648280  |
| RPS4A       | 2.110327 | 0.004867 | 3641247  |
| ADE12       | 2.10723  | 0.003325 | 3634869  |
| COX7        | 2.106684 | 0.022986 | 3638339  |
| ALG2        | 2.105947 | 0.041119 | 3647832  |
| RPL5        | 2.105814 | 0.005488 | 3637057  |
| C7_02780W_A | 2.105438 | 0.004322 | 3641361  |
| C1_09430W_A | 2.103871 | 0.030965 | 3634855  |
| KEX2        | 2.094382 | 0.013651 | 3634914  |
| KEM1        | 2.090382 | 0.003166 | 3636222  |
| C5_01940W_A | 2.089869 | 0.01859  | 3643740  |
| CR_10590W_A | 2.085286 | 0.038371 | 3639003  |
| C2_07610C_A | 2.084398 | 0.022782 | 3645195  |
| C7_04210C_A | 2.083479 | 0.002481 | 3643121  |
| C1_01930W_A | 2.080831 | 0.003258 | 30514966 |
| C3_07030C_A | 2.079511 | 0.029259 | 3638517  |
| C1_05780W_A | 2.077794 | 0.014067 | 3639888  |
| C1_10280C_A | 2.074406 | 0.025713 | 3634902  |
| ARF2        | 2.065669 | 0.002687 | 3635271  |
| PKC1        | 2.061892 | 0.005748 | 3635210  |
| YRB1        | 2.060019 | 0.013152 | 3639663  |
| MIR1        | 2.059104 | 0.004742 | 3634782  |
| CTA1        | 2.058841 | 0.040452 | 3641631  |
| C5_00580W_A | 2.057872 | 0.043387 | 3641588  |
| TIF5        | 2.055814 | 0.023735 | 3637765  |
| C3_04360W_A | 2.05573  | 0.044375 | 3635276  |
| C6_02370C_A | 2.053351 | 0.029536 | 3645882  |
| C5_03170C_A | 2.053347 | 0.027037 | 3637801  |
| APA2        | 2.051093 | 0.026088 | 3639234  |
| C4_03110W_A | 2.049828 | 0.007636 | 3637924  |
| PGA59       | 2.049397 | 0.008299 | 3637881  |
| RPL11       | 2.046266 | 0.010059 | 3643489  |
| C2_07630C_A | 2.04624  | 0.028672 | 3645193  |
| ACP1        | 2.045952 | 0.039356 | 3639825  |
| SET3        | 2.0431   | 0.010859 | 3643320  |
| NGG1        | 2.034834 | 0.014856 | 3636902  |



|             |          |          |          |
|-------------|----------|----------|----------|
| C6_02630C_A | 2.034436 | 0.033024 | 3639221  |
| RPP2B       | 2.028187 | 0.002232 | 3635195  |
| C2_07810W_A | 2.024157 | 0.046478 | 3642324  |
| C2_08620W_A | 2.022134 | 0.028149 | 3643912  |
| CR_03600C_A | 2.021621 | 0.034195 | 3643207  |
| GDS1        | 2.018434 | 0.003066 | 3642626  |
| KRS1        | 2.017693 | 0.005086 | 3638486  |
| RPG1A       | 2.013345 | 0.009494 | 3646816  |
| C2_01900C_A | 2.013175 | 0.044813 | 3635789  |
| RCT1        | 2.007684 | 0.014397 | 3641727  |
| C1_01300W_A | 2.003378 | 0.016754 | 3640185  |
| RPS21       | 2.003178 | 0.009064 | 3640242  |
| GBP2        | 1.996011 | 0.003594 | 3637992  |
| RPL4B       | 1.992748 | 0.008865 | 3643347  |
| UME1        | 1.992283 | 0.012309 | 3643101  |
| CR_10600C_A | 1.986144 | 0.023948 | 3639004  |
| SYS3        | 1.977644 | 0.013216 | 3645119  |
| C5_04300C_A | 1.975855 | 0.006859 | 3636456  |
| RPS3        | 1.971202 | 0.002633 | 3647299  |
| VPS11       | 1.966333 | 0.028491 | 3646524  |
| HGT5        | 1.964575 | 0.037318 | 3635201  |
| GYP2        | 1.958846 | 0.013272 | 3641780  |
| HEM13       | 1.957047 | 0.005406 | 3647390  |
| C5_03880C_A | 1.955631 | 0.366429 | 3647222  |
| DFR1        | 1.955425 | 0.369651 | 3641348  |
| SRB9        | 1.955146 | 0.019935 | 3635845  |
| CCT2        | 1.953221 | 0.003356 | 3643815  |
| MDL1        | 1.951441 | 0.039304 | 3640146  |
| IML2        | 1.950878 | 0.018345 | 3643302  |
| SIT1        | 1.948023 | 0.012396 | 3642307  |
| C2_00570W_A | 1.947461 | 0.022289 | 3638853  |
| MED16       | 1.943778 | 0.039254 | 3646725  |
| C3_01680C_A | 1.94238  | 0.034668 | 3636605  |
| PSD2        | 1.941222 | 0.040166 | 3636515  |
| CDC53       | 1.934129 | 0.013425 | 3636603  |
| RBD1        | 1.929509 | 0.041099 | 3642018  |
| C1_00310W_A | 1.929492 | 0.013681 | 3639298  |
| ARP8        | 1.926448 | 0.026241 | 3640200  |
| MKK2        | 1.924569 | 0.017267 | 3645580  |
| SEC61       | 1.922134 | 0.005522 | 3647462  |
| CR_01420W_A | 1.917481 | 0.016195 | 3640137  |
| LHP1        | 1.915913 | 0.020034 | 3646665  |
| IRS4        | 1.909785 | 0.031026 | 3645650  |
| PHM5        | 1.90948  | 0.023823 | 3637951  |
| C1_06890C_A | 1.909399 | 0.010487 | 30515014 |
| C1_11850W_A | 1.906676 | 0.016976 | 3642010  |
| SPT20       | 1.904564 | 0.041544 | 3642492  |

|             |          |          |          |
|-------------|----------|----------|----------|
| GUA1        | 1.901768 | 0.00384  | 3634763  |
| KEL1        | 1.901251 | 0.014751 | 3639318  |
| SIM1        | 1.899856 | 0.019313 | 3636185  |
| TUF1        | 1.893037 | 0.006811 | 3639360  |
| CR_10120C_A | 1.890725 | 0.396635 | 3638969  |
| C1_02000W_A | 1.888591 | 0.070281 | 3645418  |
| SAC7        | 1.887142 | 0.024044 | 3638010  |
| GDA1        | 1.883064 | 0.058398 | 3641762  |
| TYS1        | 1.882378 | 0.006355 | 3637870  |
| C1_06720C_A | 1.88171  | 0.118863 | 3639509  |
| CR_00420W_A | 1.880823 | 0.237445 | 3639728  |
| C3_06690C_A | 1.880646 | 0.232957 | 3642256  |
| C1_10920W_A | 1.875665 | 0.084301 | 3644433  |
| ABP140      | 1.871743 | 0.212081 | 3644592  |
| C3_07820W_A | 1.871183 | 0.223247 | 3647463  |
| C6_00680C_A | 1.870699 | 0.21641  | 30515329 |
| DDI1        | 1.867702 | 0.03738  | 3643295  |
| SEC1        | 1.866896 | 0.039379 | 3636935  |
| C5_01200W_A | 1.866037 | 0.236192 | 3642657  |
| C1_04560W_A | 1.862553 | 0.174362 | 3646130  |
| DPB2        | 1.862349 | 0.323206 | 3639026  |
| HAT2        | 1.860395 | 0.0597   | 3645973  |
| RPL15A      | 1.859884 | 0.017429 | 3641025  |
| C1_07100C_A | 1.859517 | 0.250852 | 3639487  |
| C2_10670W_A | 1.859255 | 0.012296 | 3641251  |
| C1_13030C_A | 1.857544 | 0.030702 | 3636122  |
| GSG1        | 1.85713  | 0.151101 | 3647609  |
| OCH1        | 1.855596 | 0.087235 | 3641751  |
| C2_04160W_A | 1.854347 | 0.228615 | 3637331  |
| LRG1        | 1.853651 | 0.031067 | 3639727  |
| RPL14       | 1.849267 | 0.015093 | 30515072 |
| GPI7        | 1.847638 | 0.216569 | 3647672  |
| RPT4        | 1.8462   | 0.017977 | 3640966  |
| C3_01060W_A | 1.845912 | 0.733185 | 30515174 |
| C5_03910C_A | 1.845912 | 0.733218 | 3647221  |
| C1_11050W_A | 1.845901 | 0.731259 | 3644418  |
| C1_13180W_A | 1.845901 | 0.731524 | 3636162  |
| C2_04430W_A | 1.845901 | 0.731417 | 3645469  |
| C2_10150W_A | 1.845901 | 0.731435 | 3643933  |
| C7_04340C_A | 1.845901 | 0.731475 | 30515361 |
| PGA34       | 1.845901 | 0.731376 | 3642579  |
| TEF4        | 1.845901 | 0.731454 | 3646359  |
| C3_04310C_A | 1.84589  | 0.733001 | 3635145  |
| C5_03730W_A | 1.84589  | 0.732879 | 3647238  |
| C6_03600C_A | 1.84589  | 0.733357 | 3640295  |
| C7_02140W_A | 1.84589  | 0.733178 | 3636996  |
| CR_03300C_A | 1.84589  | 0.733011 | 3645098  |

|             |          |          |          |
|-------------|----------|----------|----------|
| CR_08260C_A | 1.84589  | 0.73322  | 3642100  |
| CR_01350C_A | 1.845677 | 0.048616 | 3640166  |
| MCT1        | 1.844101 | 0.150942 | 3646683  |
| C7_01190W_A | 1.841543 | 0.157656 | 3645902  |
| RBR1        | 1.839958 | 0.741975 | 3640986  |
| C7_00380W_A | 1.839613 | 0.187155 | 3638036  |
| ARP4        | 1.837842 | 0.058427 | 3639201  |
| AVT4        | 1.834958 | 0.043997 | 3645316  |
| BIG1        | 1.834388 | 0.100249 | 3644434  |
| HYM1        | 1.833043 | 0.088898 | 3637355  |
| C1_07060C_A | 1.832252 | 0.270632 | 30515018 |
| ZCF17       | 1.832091 | 0.071116 | 3640205  |
| C2_01040W_A | 1.831496 | 0.536956 | 30515085 |
| C5_03980W_A | 1.830709 | 0.0293   | 3647442  |
| C5_02450W_A | 1.830391 | 0.066008 | 3637729  |
| C1_04640W_A | 1.828688 | 0.06631  | 3644761  |
| C1_12000C_A | 1.828476 | 0.530668 | 3642041  |
| ZCF19       | 1.828331 | 0.521818 | 3644869  |
| RPL25       | 1.82614  | 0.009903 | 30515338 |
| C2_08170W_A | 1.825938 | 0.425949 | 3642318  |
| PXA1        | 1.825005 | 0.009583 | 3639713  |
| ERD1        | 1.824915 | 0.347592 | 3640723  |
| CR_07340C_A | 1.824159 | 0.082155 | 3646056  |
| FGR50       | 1.824092 | 0.174157 | 3644859  |
| C5_04580C_A | 1.823879 | 0.255868 | 3636511  |
| C1_04580C_A | 1.823484 | 0.179221 | 3646132  |
| C4_04500C_A | 1.823175 | 0.076789 | 3641123  |
| C4_06470W_A | 1.822933 | 0.083426 | 3642790  |
| CSA1        | 1.822683 | 0.048977 | 3638009  |
| C3_00360W_A | 1.821787 | 0.127679 | 3640542  |
| CR_06520C_A | 1.821438 | 0.237796 | 3645263  |
| C4_05630W_A | 1.818632 | 0.038839 | 3641812  |
| CR_01120C_A | 1.818173 | 0.069308 | 3640434  |
| RPL32       | 1.817132 | 0.015065 | 30515335 |
| UBC4        | 1.814011 | 0.018501 | 3638927  |
| VTC3        | 1.813884 | 0.060918 | 3643206  |
| RPC31       | 1.812666 | 0.106303 | 3642577  |
| MID1        | 1.812616 | 0.096727 | 3647441  |
| C2_09600C_A | 1.806918 | 0.157359 | 3643799  |
| C1_09110W_A | 1.802857 | 0.254433 | 3634940  |
| UGA11       | 1.80272  | 0.182635 | 3637437  |
| CR_09190C_A | 1.79693  | 0.141326 | 3641885  |
| C7_02510W_A | 1.793824 | 0.153621 | 30515357 |
| C4_05180C_A | 1.793202 | 0.016553 | 3647413  |
| C3_01950C_A | 1.79306  | 0.101332 | 3636599  |
| C7_02480W_A | 1.790762 | 0.159779 | 3636944  |
| C5_03810C_A | 1.789443 | 0.303478 | 3647229  |

|             |          |          |          |
|-------------|----------|----------|----------|
| GLK4        | 1.789216 | 0.01432  | 3646046  |
| C3_01280W_A | 1.786482 | 0.145292 | 3636623  |
| C1_03180W_A | 1.78344  | 0.376014 | 3636806  |
| C3_06710W_A | 1.782979 | 0.028495 | 3638448  |
| C2_07790C_A | 1.782826 | 0.413373 | 3642326  |
| MAD2        | 1.779517 | 0.3694   | 3644696  |
| C7_01160C_A | 1.779124 | 0.22207  | 30515351 |
| C3_00660W_A | 1.778301 | 0.118112 | 3640538  |
| LPT1        | 1.776188 | 0.04198  | 3645212  |
| C5_00400C_A | 1.77555  | 0.070073 | 3641550  |
| DBF4        | 1.774693 | 0.145103 | 3641388  |
| SCT2        | 1.77454  | 0.066117 | 3643018  |
| C2_02870W_A | 1.774407 | 0.161334 | 3642972  |
| C1_02510W_A | 1.774328 | 0.271532 | 3636796  |
| C6_00430C_A | 1.773212 | 0.080884 | 3646089  |
| C1_12640W_A | 1.772634 | 0.462006 | 3646837  |
| CR_07310W_A | 1.772361 | 0.161094 | 3646058  |
| C4_03710C_A | 1.768766 | 0.194657 | 3645360  |
| C3_01890C_A | 1.766776 | 0.022861 | 3636561  |
| C3_02360C_A | 1.766054 | 0.339112 | 3636617  |
| C5_04470C_A | 1.766042 | 0.04892  | 3636414  |
| CR_09500C_A | 1.765194 | 0.125765 | 3641897  |
| C2_04300C_A | 1.764662 | 0.17617  | 3648276  |
| ULP1        | 1.762093 | 0.124984 | 3638314  |
| C1_03790C_A | 1.761409 | 0.037221 | 3644682  |
| PEP1        | 1.761273 | 0.038107 | 3647612  |
| C4_01310W_A | 1.761139 | 0.453249 | 3635604  |
| CR_06790C_A | 1.7611   | 0.251551 | 3647311  |
| CHK1        | 1.760901 | 0.06647  | 3637394  |
| BAT21       | 1.759775 | 0.067765 | 3637356  |
| VPS4        | 1.759161 | 0.063435 | 3637703  |
| CR_02060W_A | 1.757992 | 0.174704 | 3640155  |
| C2_04780W_A | 1.756471 | 0.072505 | 3647781  |
| C2_04490W_A | 1.75559  | 0.102119 | 3645463  |
| C4_03990C_A | 1.752692 | 0.471661 | 3648295  |
| FGR17       | 1.751863 | 0.267829 | 3640296  |
| RPL27A      | 1.748547 | 0.0196   | 30515062 |
| HMO1        | 1.745067 | 0.048882 | 3646685  |
| SES1        | 1.744021 | 0.023711 | 3638415  |
| C1_06360W_A | 1.743397 | 0.187111 | 3639561  |
| MNN9        | 1.742832 | 0.10466  | 3641735  |
| C1_04970W_A | 1.741939 | 0.110439 | 3647528  |
| CR_05890C_A | 1.739904 | 0.102818 | 3646682  |
| CR_05120W_A | 1.739583 | 0.074324 | 3646402  |
| CR_09660W_A | 1.739522 | 0.246143 | 3647092  |
| CR_04230W_A | 1.738333 | 0.123432 | 3640944  |
| MSH3        | 1.73787  | 0.14286  | 3643889  |

|             |          |          |          |
|-------------|----------|----------|----------|
| CDC23       | 1.734768 | 0.128176 | 3642111  |
| ECM17       | 1.734433 | 0.027227 | 3644077  |
| DAD4        | 1.733955 | 0.385724 | 30515433 |
| SPS20       | 1.731054 | 0.12631  | 3645739  |
| C6_00250W_A | 1.730241 | 0.023438 | 3646063  |
| VRP1        | 1.729011 | 0.066921 | 3642293  |
| PEX17       | 1.726953 | 0.190412 | 3643886  |
| ERB1        | 1.725472 | 0.06969  | 3644702  |
| C1_05660C_A | 1.72537  | 0.020358 | 3639900  |
| ASC1        | 1.725195 | 0.031702 | 3645907  |
| OPT3        | 1.720858 | 0.131747 | 3644918  |
| THI6        | 1.720107 | 0.221264 | 3638333  |
| C1_12670C_A | 1.719334 | 0.203943 | 3646834  |
| C1_11250W_A | 1.716249 | 0.170234 | 3644556  |
| NUP85       | 1.715399 | 0.047429 | 3635175  |
| MDJ2        | 1.715303 | 0.567644 | 3643437  |
| C2_07700C_A | 1.715203 | 0.569677 | 3642337  |
| VAN1        | 1.714938 | 0.08691  | 3638527  |
| PGA49       | 1.714194 | 0.22597  | 3646525  |
| PSY2        | 1.714055 | 0.223127 | 3644567  |
| ADE4        | 1.711603 | 0.056937 | 3641769  |
| RPS20       | 1.711337 | 0.013978 | 3642071  |
| C4_05620C_A | 1.710217 | 0.314364 | 3641783  |
| ZUO1        | 1.709549 | 0.038302 | 3637908  |
| ZCF10       | 1.706521 | 0.138511 | 3643485  |
| RPL23A      | 1.705382 | 0.021535 | 3647558  |
| C4_02100C_A | 1.704081 | 0.302093 | 3635641  |
| NUP82       | 1.7038   | 0.049254 | 3640261  |
| C4_02780W_A | 1.702755 | 0.061855 | 3637902  |
| C2_05390C_A | 1.701576 | 0.600001 | 3643434  |
| CR_05960W_A | 1.696964 | 0.490533 | 30515417 |
| C4_02950C_A | 1.696266 | 0.480107 | 3637874  |
| C2_03170W_A | 1.696056 | 0.482434 | 3642988  |
| C6_03240W_A | 1.694266 | 0.493067 | 3639181  |
| C1_09000W_A | 1.692926 | 0.208284 | 3634915  |
| DNA2        | 1.691265 | 0.223727 | 3646072  |
| C5_04960W_A | 1.689801 | 0.055982 | 3636423  |
| C1_03540C_A | 1.688618 | 0.412106 | 3636920  |
| CR_08520C_A | 1.688519 | 0.403715 | 30515443 |
| C2_08690C_A | 1.688022 | 0.371217 | 3643888  |
| CR_10290C_A | 1.686833 | 0.076881 | 3638935  |
| HST3        | 1.686766 | 0.101255 | 3642641  |
| C7_03370C_A | 1.685859 | 0.07764  | 3646720  |
| TIF         | 1.684875 | 0.042306 | 3640190  |
| C3_03060W_A | 1.684115 | 0.364583 | 3638395  |
| C3_07760C_A | 1.681664 | 0.333139 | 3638450  |
| MXR1        | 1.681504 | 0.070793 | 3638881  |

|             |          |          |         |
|-------------|----------|----------|---------|
| DCW1        | 1.681445 | 0.052753 | 3638842 |
| RPS18       | 1.679626 | 0.033291 | 3637953 |
| LIP5        | 1.678989 | 0.352943 | 3641356 |
| C3_00610W_A | 1.678698 | 0.248338 | 3640578 |
| C5_00790C_A | 1.678023 | 0.067612 | 3644125 |
| C3_02290W_A | 1.677783 | 0.265956 | 3636556 |
| CR_06930W_A | 1.676816 | 0.220248 | 3648382 |
| C6_04110W_A | 1.675819 | 0.068898 | 3647834 |
| CR_10170C_A | 1.675017 | 0.085635 | 3638916 |
| CR_00490W_A | 1.67264  | 0.088983 | 3639723 |
| C7_04010W_A | 1.671772 | 0.092414 | 3643112 |
| URE2        | 1.670773 | 0.136567 | 3647795 |
| C2_06320W_A | 1.670383 | 0.085805 | 3646927 |
| CR_09100C_A | 1.669154 | 0.175017 | 3641928 |
| YHB5        | 1.668699 | 0.107824 | 3647343 |
| RSR1        | 1.666943 | 0.097632 | 3640145 |
| SAL6        | 1.66615  | 0.048572 | 3640289 |
| RPS23A      | 1.665292 | 0.035906 | 3639515 |
| ALS3        | 1.665161 | 0.049025 | 3647965 |
| ULP3        | 1.66409  | 0.164825 | 3640526 |
| CR_08990C_A | 1.662304 | 0.087635 | 3641891 |
| C1_09360C_A | 1.66132  | 0.103642 | 3634807 |
| C1_12700W_A | 1.656039 | 0.319898 | 3646831 |
| C6_00210W_A | 1.655473 | 0.102156 | 3646060 |
| NIP1        | 1.65537  | 0.073634 | 3635618 |
| C5_02690W_A | 1.652702 | 0.193643 | 3637775 |
| CDC47       | 1.65208  | 0.167791 | 3645780 |
| C4_03600C_A | 1.651903 | 0.056964 | 3645366 |
| AYR2        | 1.651471 | 0.09348  | 3639184 |
| VPH1        | 1.651298 | 0.032693 | 3646157 |
| UBP1        | 1.65067  | 0.105258 | 3641760 |
| C1_02390W_A | 1.648057 | 0.144884 | 3636791 |
| TCP1        | 1.646686 | 0.05341  | 3646499 |
| CDC54       | 1.643035 | 0.436426 | 3647606 |
| C2_10720C_A | 1.642474 | 0.113469 | 3641209 |
| C1_08390C_A | 1.64122  | 0.082652 | 3646504 |
| C1_06390W_A | 1.640896 | 0.197957 | 3639558 |
| TIP41       | 1.640855 | 0.164423 | 3636506 |
| PRE10       | 1.639244 | 0.124653 | 3636957 |
| CHS5        | 1.639007 | 0.031043 | 3637333 |
| VAC8        | 1.637846 | 0.045264 | 3647410 |
| C3_00830C_A | 1.637069 | 0.216916 | 3647757 |
| C1_03460C_A | 1.634217 | 0.239312 | 3636911 |
| NPL3        | 1.634173 | 0.053286 | 3643310 |
| C5_01880C_A | 1.633689 | 0.23851  | 3643751 |
| C4_02430W_A | 1.633468 | 0.116421 | 3637848 |
| C1_12740W_A | 1.632485 | 0.177211 | 3646819 |

|             |          |          |          |
|-------------|----------|----------|----------|
| LYS14       | 1.63206  | 0.341755 | 3639217  |
| C7_04060W_A | 1.631328 | 0.512762 | 3643156  |
| C2_09910C_A | 1.631308 | 0.512185 | 30515162 |
| CDC60       | 1.630491 | 0.044544 | 3640128  |
| CRK1        | 1.629901 | 0.098136 | 3643414  |
| GGA2        | 1.627169 | 0.056686 | 3636928  |
| C3_01790C_A | 1.626633 | 0.175809 | 3636587  |
| C5_00950C_A | 1.623469 | 0.110144 | 3642653  |
| C3_03380W_A | 1.623311 | 0.168714 | 3638367  |
| C2_02700C_A | 1.623154 | 0.255715 | 3643005  |
| NUP188      | 1.617011 | 0.037434 | 3634858  |
| GTR1        | 1.616773 | 0.30331  | 3643914  |
| C1_10110W_A | 1.616612 | 0.297865 | 3634778  |
| IMP1        | 1.61646  | 0.300986 | 3636881  |
| SRP101      | 1.614665 | 0.095191 | 3636513  |
| C1_02040C_A | 1.612857 | 0.041225 | 3644586  |
| C2_08380C_A | 1.609426 | 0.372951 | 3648253  |
| NAT5        | 1.607888 | 0.210007 | 3641022  |
| WRS1        | 1.607306 | 0.138881 | 3642060  |
| C5_00850C_A | 1.60637  | 0.633203 | 3642637  |
| SAP4        | 1.60637  | 0.633134 | 3640257  |
| CDC45       | 1.606085 | 0.257113 | 3648293  |
| RTF1        | 1.604988 | 0.135432 | 3637964  |
| C6_00500C_A | 1.604633 | 0.285332 | 3647149  |
| C4_05000W_A | 1.604479 | 0.6282   | 3641149  |
| CR_00870C_A | 1.602146 | 0.620773 | 3640398  |
| PGA26       | 1.602146 | 0.620738 | 3639890  |
| C2_01570W_A | 1.602136 | 0.619175 | 3635782  |
| RIA1        | 1.601774 | 0.090742 | 3644478  |
| C3_06540C_A | 1.600168 | 0.468541 | 3642274  |
| C2_10630W_A | 1.599255 | 0.20134  | 3641248  |
| C4_05380C_A | 1.597645 | 0.457429 | 30515276 |
| C3_06680C_A | 1.596568 | 0.381685 | 3642255  |
| C1_10500W_A | 1.596337 | 0.387962 | 3647188  |
| BMT8        | 1.595663 | 0.198386 | 3637442  |
| AAT22       | 1.594315 | 0.437089 | 3635651  |
| NIP100      | 1.591548 | 0.168487 | 3640970  |
| PEX4        | 1.591446 | 0.153215 | 3636429  |
| CR_05970C_A | 1.591431 | 0.143233 | 3642502  |
| C1_12110C_A | 1.590873 | 0.640216 | 3642054  |
| GUK1        | 1.590072 | 0.197488 | 3647231  |
| C3_03830W_A | 1.58892  | 0.23346  | 3645630  |
| CR_04720C_A | 1.588739 | 0.044085 | 3648140  |
| ALG11       | 1.586015 | 0.414692 | 3645871  |
| C3_06800C_A | 1.584725 | 0.271142 | 3638497  |
| SMD3        | 1.584364 | 0.377511 | 3647060  |
| TLO13       | 1.584337 | 0.373957 | 3647891  |

|             |          |          |          |
|-------------|----------|----------|----------|
| C2_08320C_A | 1.583395 | 0.565993 | 3648167  |
| C6_01300W_A | 1.582425 | 0.275193 | 3644024  |
| NIT2        | 1.581212 | 0.184451 | 3641874  |
| POB3        | 1.579803 | 0.108686 | 3635827  |
| SHE9        | 1.579583 | 0.187431 | 3642984  |
| CR_08640C_A | 1.579508 | 0.122647 | 3642112  |
| C1_02740C_A | 1.579366 | 0.428087 | 3636827  |
| C1_04980C_A | 1.5777   | 0.18034  | 3647529  |
| CR_02390W_A | 1.576119 | 0.098072 | 3644930  |
| C1_06190C_A | 1.575953 | 0.145642 | 3648391  |
| C4_06660W_A | 1.575534 | 0.172846 | 3642809  |
| C1_01220C_A | 1.575511 | 0.123778 | 3640210  |
| C7_00790W_A | 1.575244 | 0.180057 | 3637943  |
| CR_06820W_A | 1.575124 | 0.343023 | 3647325  |
| C1_00760W_A | 1.574256 | 0.169397 | 3639351  |
| C3_00640W_A | 1.573679 | 0.151846 | 3640574  |
| MGM101      | 1.572769 | 0.207617 | 3636820  |
| CR_09640C_A | 1.5724   | 0.246927 | 30515456 |
| BAT22       | 1.571898 | 0.078616 | 3643663  |
| SSN8        | 1.570584 | 0.251291 | 3641718  |
| C5_03140C_A | 1.570573 | 0.098986 | 3637798  |
| CR_08930C_A | 1.570231 | 0.131143 | 3641913  |
| PHO89       | 1.569918 | 0.207957 | 3635633  |
| ADH1        | 1.567008 | 0.10051  | 3636489  |
| DCC1        | 1.566479 | 0.553743 | 3638037  |
| C6_04230W_A | 1.566378 | 0.556359 | 3646274  |
| C3_06810W_A | 1.565351 | 0.200214 | 3638545  |
| MYO5        | 1.565264 | 0.066019 | 3647404  |
| SWI4        | 1.563536 | 0.250899 | 3645408  |
| C2_02910W_A | 1.56153  | 0.581497 | 30515097 |
| EMC9        | 1.557997 | 0.05965  | 3647918  |
| LCB2        | 1.55641  | 0.192626 | 3636181  |
| C2_09830C_A | 1.555896 | 0.289282 | 30515161 |
| C2_06040C_A | 1.555873 | 0.384505 | 3644069  |
| C4_04750W_A | 1.55512  | 0.178191 | 3641133  |
| GLG2        | 1.554181 | 0.214031 | 3642282  |
| MCM1        | 1.551876 | 0.150235 | 3638050  |
| C1_09470C_A | 1.551582 | 0.206762 | 3634761  |
| C3_01570W_A | 1.550132 | 0.309099 | 3636668  |
| C3_05150W_A | 1.54914  | 0.127041 | 3635162  |
| LCB4        | 1.546795 | 0.306993 | 3642057  |
| LKH1        | 1.546609 | 0.052594 | 3647187  |
| C3_06110C_A | 1.545378 | 0.136044 | 3641761  |
| HYS2        | 1.544686 | 0.287909 | 3636441  |
| RAD14       | 1.541991 | 0.23026  | 3636953  |
| C1_04860W_A | 1.541933 | 0.159767 | 3644784  |
| CSH3        | 1.540854 | 0.13269  | 3646798  |



|             |          |          |         |
|-------------|----------|----------|---------|
| SIN3        | 1.540743 | 0.057279 | 3639282 |
| UBP6        | 1.540512 | 0.090198 | 3639317 |
| FLC3        | 1.539394 | 0.158791 | 3642322 |
| C4_01120C_A | 1.539266 | 0.338874 | 3635683 |
| C7_00490C_A | 1.538665 | 0.185197 | 3637986 |
| C5_03830C_A | 1.537989 | 0.172685 | 3647227 |
| CR_04450C_A | 1.536928 | 0.116452 | 3640987 |
| SGT1        | 1.536875 | 0.096844 | 3644068 |
| RHR2        | 1.536402 | 0.125577 | 3640522 |
| SSC1        | 1.53318  | 0.089777 | 3645232 |
| C2_09070C_A | 1.530685 | 0.131041 | 3644111 |
| SEC5        | 1.528282 | 0.213604 | 3648178 |
| CDC15       | 1.528005 | 0.161031 | 3643459 |
| MCA1        | 1.525871 | 0.118378 | 3635233 |
| CR_03860C_A | 1.524352 | 0.214867 | 3643186 |
| C4_00170W_A | 1.521301 | 0.136363 | 3645028 |
| SBP1        | 1.521277 | 0.096319 | 3635280 |
| YPT1        | 1.520156 | 0.08925  | 3636915 |
| C5_04360C_A | 1.520102 | 0.192501 | 3636483 |
| AGP2        | 1.518567 | 0.129773 | 3635684 |
| C2_08340C_A | 1.517565 | 0.457213 | 3648165 |
| C7_00920C_A | 1.515673 | 0.297643 | 3637957 |
| C4_04870C_A | 1.513646 | 0.091551 | 3641160 |
| C4_05610C_A | 1.511242 | 0.10766  | 3641782 |
| CR_01560W_A | 1.511149 | 0.438636 | 3640075 |
| C5_01190W_A | 1.509813 | 0.192661 | 3642659 |
| TEA1        | 1.509025 | 0.162143 | 3643671 |
| MEX67       | 1.507748 | 0.194402 | 3641020 |
| AMN1        | 1.507164 | 0.467826 | 3635795 |
| C1_08180C_A | 1.506743 | 0.105915 | 3640743 |
| RAM2        | 1.506308 | 0.253856 | 3634767 |
| C5_01110W_A | 1.506055 | 0.171678 | 3642623 |
| CST20       | 1.505842 | 0.187344 | 3637790 |
| GLN1        | 1.505762 | 0.167018 | 3646386 |
| C2_01960C_A | 1.505347 | 0.691123 | 3635796 |
| C6_02810C_A | 1.503873 | 0.198686 | 3639248 |
| FCY21       | 1.503572 | 0.106288 | 3643822 |
| C1_04150C_A | 1.502404 | 0.595892 | 3644704 |
| C6_01200W_A | 1.501747 | 0.593131 | 3644041 |
| C1_12060C_A | 1.501659 | 0.595753 | 3642026 |
| TIM13       | 1.501622 | 0.587322 | 3637868 |
| C7_00850W_A | 1.501621 | 0.315781 | 3638056 |
| C1_07850C_A | 1.501525 | 0.588477 | 3640739 |
| C2_10730W_A | 1.501457 | 0.597363 | 3641210 |
| CR_01050C_A | 1.499497 | 0.250237 | 3640384 |
| ROD1        | 1.497887 | 0.193945 | 3635763 |
| C7_01650W_A | 1.497044 | 0.113846 | 3636984 |

|             |          |          |          |
|-------------|----------|----------|----------|
| RPL12       | 1.496609 | 0.108897 | 3636659  |
| RPS21B      | 1.496524 | 0.074511 | 30514961 |
| ENT3        | 1.494424 | 0.092155 | 3635813  |
| CR_07850W_A | 1.494306 | 0.167191 | 3647347  |
| C1_00470C_A | 1.492093 | 0.223924 | 3639315  |
| TAF60       | 1.490532 | 0.176333 | 3642252  |
| C2_08720W_A | 1.490436 | 0.243704 | 3643885  |
| C4_06360C_A | 1.48897  | 0.678895 | 3642825  |
| C6_00180C_A | 1.488952 | 0.686087 | 3646081  |
| C4_04950W_A | 1.488873 | 0.678302 | 3641168  |
| SUP35       | 1.488742 | 0.109327 | 3643785  |
| RUB1        | 1.488493 | 0.430585 | 30515194 |
| MED14       | 1.488479 | 0.220024 | 3637800  |
| MNR2        | 1.486789 | 0.087338 | 3645017  |
| C1_09910C_A | 1.486379 | 0.475289 | 3634798  |
| AGE1        | 1.486038 | 0.181428 | 3636913  |
| DAL4        | 1.48388  | 0.483158 | 3638422  |
| PEP8        | 1.482477 | 0.176514 | 3645624  |
| PEX2        | 1.480508 | 0.248089 | 3643460  |
| AGE2        | 1.479937 | 0.194969 | 3643810  |
| C1_03630W_A | 1.477118 | 0.239223 | 3636882  |
| CR_09530C_A | 1.476881 | 0.231191 | 3647101  |
| PKD2        | 1.476768 | 0.136588 | 3641876  |
| FOL1        | 1.474054 | 0.235836 | 3644123  |
| C5_02350C_A | 1.473946 | 0.510858 | 3637791  |
| C6_02740W_A | 1.473877 | 0.284674 | 3639216  |
| POM152      | 1.472714 | 0.205106 | 3638812  |
| MGE1        | 1.472468 | 0.134834 | 3640133  |
| FDH1        | 1.472465 | 0.43855  | 3646398  |
| C4_02340W_A | 1.472062 | 0.18685  | 3637883  |
| CR_01360W_A | 1.471691 | 0.435713 | 3640167  |
| C7_00310C_A | 1.471011 | 0.348346 | 3638045  |
| HOS2        | 1.469884 | 0.263544 | 3640509  |
| SKI8        | 1.469326 | 0.215543 | 3640294  |
| CR_07160C_A | 1.46889  | 0.196447 | 3648347  |
| C1_14030W_A | 1.468242 | 0.272322 | 3643340  |
| VPS16       | 1.467073 | 0.243217 | 3646150  |
| RPN3        | 1.466445 | 0.137896 | 3636917  |
| TUP1        | 1.465855 | 0.128164 | 3639369  |
| C1_14090W_A | 1.464698 | 0.262142 | 30515079 |
| RPS22A      | 1.464675 | 0.129555 | 3639551  |
| TIM8        | 1.464447 | 0.449509 | 3647469  |
| ATM1        | 1.46442  | 0.258722 | 3646284  |
| CZF1        | 1.464379 | 0.154584 | 3642915  |
| WSC4        | 1.464289 | 0.154511 | 3643282  |
| C5_03670C_A | 1.463792 | 0.347187 | 3646987  |
| C7_03010W_A | 1.463276 | 0.187021 | 3641382  |

|             |          |          |          |
|-------------|----------|----------|----------|
| ZRT2        | 1.462989 | 0.391116 | 3635861  |
| KRE9        | 1.461857 | 0.181705 | 3635183  |
| SMI1B       | 1.461255 | 0.549787 | 3643675  |
| C1_13690C_A | 1.460629 | 0.265806 | 30515076 |
| C3_01220W_A | 1.459241 | 0.374709 | 3636610  |
| RPB8        | 1.459042 | 0.314447 | 3647301  |
| PCT1        | 1.458454 | 0.16798  | 3645743  |
| VPS33       | 1.456704 | 0.277885 | 3647477  |
| C4_01950W_A | 1.456229 | 0.21651  | 3635665  |
| C1_10620W_A | 1.455529 | 0.109307 | 3647682  |
| CCT6        | 1.454782 | 0.195353 | 3642914  |
| C1_12430W_A | 1.453859 | 0.259944 | 3642013  |
| CR_09490W_A | 1.452878 | 0.178916 | 3641896  |
| GAP6        | 1.451616 | 0.168881 | 3646968  |
| C1_11090C_A | 1.451174 | 0.215793 | 3644415  |
| C2_05050C_A | 1.451166 | 0.452558 | 3643450  |
| C7_00210C_A | 1.450997 | 0.282239 | 3637983  |
| SIW14       | 1.450996 | 0.455324 | 3647323  |
| C7_01350C_A | 1.449349 | 0.378573 | 3645899  |
| RVS162      | 1.449185 | 0.290853 | 3646820  |
| C1_11010C_A | 1.448959 | 0.326968 | 3644421  |
| C2_00390C_A | 1.4484   | 0.217321 | 3638822  |
| GSH2        | 1.445394 | 0.223344 | 3642083  |
| SPO75       | 1.441922 | 0.297523 | 3645364  |
| C2_01720C_A | 1.441489 | 0.361225 | 3635731  |
| EHD3        | 1.441406 | 0.315748 | 3636858  |
| C4_03160C_A | 1.440692 | 0.472882 | 3637841  |
| C1_12070C_A | 1.440565 | 0.473471 | 3642025  |
| C5_00230C_A | 1.436801 | 0.630705 | 3641564  |
| C2_02500W_A | 1.434965 | 0.243076 | 3635816  |
| ACF2        | 1.434833 | 0.276636 | 3641613  |
| C6_00800C_A | 1.432611 | 0.14486  | 3647069  |
| CR_00830W_A | 1.43222  | 0.506418 | 3640412  |
| C3_02970C_A | 1.431403 | 0.307636 | 3638385  |
| CDC48       | 1.431138 | 0.178797 | 3644440  |
| PUP1        | 1.429633 | 0.158266 | 3638936  |
| CR_05460W_A | 1.427622 | 0.304502 | 3648237  |
| C1_06560W_A | 1.426847 | 0.30019  | 3639517  |
| RCE1        | 1.426666 | 0.384276 | 3641104  |
| CR_05700C_A | 1.426633 | 0.310449 | 3646701  |
| C4_03960W_A | 1.426488 | 0.254036 | 30515264 |
| FAD2        | 1.424442 | 0.117071 | 3644053  |
| C2_03130W_A | 1.424427 | 0.358178 | 3642993  |
| TRM1        | 1.424292 | 0.333404 | 3640396  |
| PUP3        | 1.423263 | 0.249034 | 3646718  |
| C6_02430W_A | 1.422057 | 0.264547 | 3639163  |
| IFF5        | 1.421675 | 0.219184 | 3642782  |

|             |          |          |          |
|-------------|----------|----------|----------|
| C2_04330C_A | 1.421499 | 0.370931 | 3645453  |
| PTC4        | 1.420902 | 0.235042 | 3646697  |
| NGS1        | 1.419903 | 0.180866 | 3639703  |
| C3_07630C_A | 1.419499 | 0.262778 | 3638491  |
| C2_00110W_A | 1.418124 | 0.408745 | 3647921  |
| C1_03920C_A | 1.416764 | 0.495061 | 3646413  |
| INO4        | 1.415985 | 0.415951 | 30515105 |
| C6_00260W_A | 1.415277 | 0.190794 | 3646065  |
| C7_03990C_A | 1.413964 | 0.322586 | 3643115  |
| C4_03150W_A | 1.413479 | 0.251134 | 3637842  |
| FAA4        | 1.413237 | 0.186495 | 3638973  |
| C6_02640C_A | 1.413163 | 0.328818 | 3639222  |
| RRD1        | 1.412284 | 0.411733 | 3638445  |
| C3_01120W_A | 1.411962 | 0.40365  | 3639836  |
| C6_03310W_A | 1.411912 | 0.40404  | 3639197  |
| CR_02610C_A | 1.41122  | 0.218058 | 3642566  |
| SPE2        | 1.409742 | 0.263126 | 3644116  |
| RPC19       | 1.40951  | 0.427632 | 3647693  |
| C4_05010W_A | 1.408837 | 0.229175 | 3641148  |
| C2_00920W_A | 1.408105 | 0.379528 | 3638893  |
| VPS2        | 1.408042 | 0.349323 | 3641546  |
| C3_05110W_A | 1.407882 | 0.377992 | 3635158  |
| RPS24       | 1.407589 | 0.135759 | 3640568  |
| C1_14020W_A | 1.404744 | 0.853792 | 3643339  |
| C4_00250W_A | 1.404744 | 0.853903 | 3645035  |
| RHO2        | 1.404621 | 0.558016 | 30515143 |
| C1_08110W_A | 1.404305 | 0.220556 | 3640716  |
| C1_04230W_A | 1.403504 | 0.258774 | 3644722  |
| C3_02070C_A | 1.401957 | 0.851269 | 3636576  |
| C3_05640W_A | 1.401957 | 0.851177 | 3643654  |
| C1_06220C_A | 1.401948 | 0.85118  | 3647518  |
| C2_06140C_A | 1.401948 | 0.85118  | 3644082  |
| C6_01130W_A | 1.401948 | 0.85118  | 3644055  |
| C6_04070C_A | 1.401948 | 0.851272 | 3647826  |
| C7_02360W_A | 1.401948 | 0.851272 | 3636931  |
| PGA28       | 1.401948 | 0.851272 | 3641350  |
| PGA61       | 1.401948 | 0.851272 | 3640292  |
| SAP5        | 1.401948 | 0.85118  | 3639268  |
| ORC4        | 1.401691 | 0.286042 | 3637753  |
| C7_00580C_A | 1.400846 | 0.489584 | 3637995  |
| PEX22       | 1.400544 | 0.408511 | 3648103  |
| TRP5        | 1.400455 | 0.196534 | 3648087  |
| C3_03680W_A | 1.400304 | 0.235036 | 3645648  |
| AXL2        | 1.399635 | 0.345558 | 3641184  |
| C1_12090C_A | 1.399435 | 0.85475  | 3642056  |
| C5_04690C_A | 1.399435 | 0.855297 | 30515320 |
| GTT1        | 1.399435 | 0.85507  | 3643653  |

|             |          |          |          |
|-------------|----------|----------|----------|
| RNY11       | 1.399435 | 0.855395 | 3636408  |
| RDH54       | 1.399244 | 0.336978 | 3641231  |
| C5_00560W_A | 1.397954 | 0.260626 | 3648267  |
| C1_13190W_A | 1.397522 | 0.203396 | 3636163  |
| C5_05260W_A | 1.397512 | 0.516299 | 3636473  |
| RFX2        | 1.397468 | 0.578277 | 3635658  |
| CR_03130W_A | 1.397381 | 0.542427 | 3645121  |
| SSZ1        | 1.397026 | 0.156751 | 3641139  |
| C2_04360W_A | 1.394821 | 0.37933  | 3645461  |
| SYN8        | 1.393696 | 0.501364 | 3645120  |
| C3_02850C_A | 1.392818 | 0.517836 | 3638332  |
| LEA1        | 1.392639 | 0.507972 | 3641807  |
| CR_02120C_A | 1.392623 | 0.509207 | 3640143  |
| TIM44       | 1.390689 | 0.20398  | 3640529  |
| KIN2        | 1.389474 | 0.193705 | 3639697  |
| SMT3        | 1.388311 | 0.215223 | 3644550  |
| IST1        | 1.388211 | 0.511449 | 3640587  |
| C1_04270C_A | 1.387825 | 0.757653 | 3644708  |
| MRS7        | 1.385555 | 0.253537 | 3640187  |
| C7_02220C_A | 1.383282 | 0.295127 | 3636989  |
| C5_03100C_A | 1.382526 | 0.32579  | 3637704  |
| C5_00150C_A | 1.382209 | 0.189666 | 3647872  |
| C1_12920C_A | 1.381324 | 0.411498 | 3636155  |
| CR_06780W_A | 1.381254 | 0.255869 | 3647312  |
| CTF18       | 1.379287 | 0.422008 | 3640431  |
| VPS15       | 1.378728 | 0.312824 | 3644040  |
| C5_02390C_A | 1.378408 | 0.293883 | 3637795  |
| C2_04450W_A | 1.377123 | 0.747067 | 3645467  |
| RPL10       | 1.376543 | 0.203291 | 3636850  |
| NCB2        | 1.376429 | 0.345184 | 3643028  |
| VPS41       | 1.376117 | 0.346482 | 3634800  |
| CR_03440W_A | 1.375804 | 0.741154 | 3645112  |
| STN1        | 1.375804 | 0.739635 | 3643901  |
| C4_05730W_A | 1.375723 | 0.739879 | 3641805  |
| C2_08750W_A | 1.375707 | 0.743924 | 3643881  |
| C6_01950C_A | 1.375483 | 0.336546 | 3644558  |
| C2_02620W_A | 1.374733 | 0.338963 | 3635838  |
| PEX19       | 1.372915 | 0.213719 | 3642108  |
| CCT7        | 1.372515 | 0.229664 | 3643734  |
| IPK1        | 1.371256 | 0.375682 | 3648091  |
| C3_07850W_A | 1.370635 | 0.314827 | 3647466  |
| IFI3        | 1.370414 | 0.631299 | 3644694  |
| CR_03700C_A | 1.370281 | 0.235319 | 3643223  |
| C1_09940W_A | 1.369087 | 0.5445   | 30515037 |
| YAE1        | 1.368406 | 0.495066 | 3637941  |
| ALG7        | 1.368033 | 0.428114 | 3642291  |
| C4_01650C_A | 1.367654 | 0.370146 | 3635713  |

|             |          |          |          |
|-------------|----------|----------|----------|
| C5_01000C_A | 1.36753  | 0.300128 | 3642651  |
| RTT101      | 1.367364 | 0.346855 | 3639827  |
| MSO1        | 1.366681 | 0.384546 | 3642040  |
| CR_06260W_A | 1.363358 | 0.456128 | 3644853  |
| MET18       | 1.362714 | 0.491589 | 3636631  |
| C2_10230W_A | 1.361931 | 0.477359 | 3643925  |
| C1_13720W_A | 1.36192  | 0.344958 | 3636134  |
| NTF2        | 1.35967  | 0.349765 | 30515039 |
| C1_07360W_A | 1.356724 | 0.301718 | 3644470  |
| NTH1        | 1.356622 | 0.178544 | 3639665  |
| MNN12       | 1.355732 | 0.336198 | 3634904  |
| PPZ1        | 1.355266 | 0.346923 | 3645265  |
| C7_03610C_A | 1.354432 | 0.326037 | 3646241  |
| C7_01270C_A | 1.354407 | 0.513962 | 3645908  |
| C6_02680W_A | 1.354384 | 0.444913 | 3639226  |
| C5_01140C_A | 1.354236 | 0.288639 | 3642663  |
| C1_11730W_A | 1.353326 | 0.323202 | 3645318  |
| PRE1        | 1.353002 | 0.307958 | 3636500  |
| PHO91       | 1.35288  | 0.23285  | 3644588  |
| C4_06690C_A | 1.352873 | 0.302674 | 30515285 |
| C5_05150C_A | 1.352003 | 0.464702 | 3636461  |
| C5_01090C_A | 1.351135 | 0.341408 | 3642625  |
| VTI1        | 1.350299 | 0.342343 | 3638352  |
| SWD3        | 1.349709 | 0.588707 | 3645890  |
| C3_03430C_A | 1.347772 | 0.542647 | 3638355  |
| C1_06710W_A | 1.347593 | 0.387962 | 3639510  |
| C1_06590C_A | 1.347365 | 0.330119 | 3639514  |
| CR_08350W_A | 1.347279 | 0.260149 | 3642082  |
| CR_05980W_A | 1.347187 | 0.203244 | 3642501  |
| MEC1        | 1.346958 | 0.395865 | 3647733  |
| TIM10       | 1.346465 | 0.406416 | 30515247 |
| LYS142      | 1.344974 | 0.361715 | 3634896  |
| C6_03420W_A | 1.344629 | 0.558393 | 3639235  |
| C7_00190W_A | 1.344454 | 0.444769 | 3637969  |
| C4_03040W_A | 1.343018 | 0.446728 | 30515253 |
| C1_01400C_A | 1.34249  | 0.322877 | 3640237  |
| NOP1        | 1.342476 | 0.265325 | 3642947  |
| C1_05630C_A | 1.342171 | 0.191332 | 3639840  |
| RPN5        | 1.341602 | 0.202046 | 3636405  |
| RAD50       | 1.341371 | 0.310268 | 3636594  |
| C5_03690W_A | 1.341201 | 0.587518 | 3646989  |
| C3_00730W_A | 1.34109  | 0.380496 | 3640530  |
| SNF4        | 1.340031 | 0.256976 | 3640264  |
| LAC1        | 1.339145 | 0.606409 | 3641717  |
| TFA1        | 1.338329 | 0.323571 | 3634850  |
| ROT2        | 1.337302 | 0.368815 | 3641566  |
| C3_03150W_A | 1.335822 | 0.314032 | 3638423  |

|             |          |          |          |
|-------------|----------|----------|----------|
| PRE6        | 1.334991 | 0.3732   | 30515395 |
| C5_04920C_A | 1.334974 | 0.27976  | 3636419  |
| C1_11720W_A | 1.334873 | 0.624529 | 3645319  |
| C4_06670W_A | 1.334793 | 0.625096 | 3642951  |
| C5_03530C_A | 1.334777 | 0.62132  | 3646971  |
| C3_06830C_A | 1.334616 | 0.357102 | 3638543  |
| DIT2        | 1.334612 | 0.617196 | 3640962  |
| C4_01660W_A | 1.334493 | 0.277727 | 3635712  |
| C2_01340W_A | 1.334339 | 0.279186 | 3638844  |
| PHO88       | 1.333595 | 0.424362 | 3641898  |
| GCR3        | 1.332067 | 0.298613 | 3646485  |
| C2_05520W_A | 1.331703 | 0.544629 | 3643421  |
| RPL21A      | 1.331462 | 0.237533 | 3637400  |
| CR_03540W_A | 1.331021 | 0.455188 | 3643215  |
| PHO81       | 1.330705 | 0.397501 | 3639662  |
| RIB3        | 1.329562 | 0.317643 | 3642062  |
| MDG1        | 1.329158 | 0.275772 | 3643311  |
| RPS25B      | 1.328714 | 0.226166 | 3646972  |
| TDH3        | 1.328256 | 0.29758  | 3638540  |
| C3_03820C_A | 1.32823  | 0.414832 | 3645631  |
| PR26        | 1.327575 | 0.230098 | 3642981  |
| C2_05040C_A | 1.325628 | 0.328465 | 3643449  |
| YKT6        | 1.325223 | 0.373454 | 3636863  |
| C1_09620C_A | 1.322289 | 0.509682 | 3634892  |
| C1_09570W_A | 1.321136 | 0.406638 | 3634887  |
| AVT7        | 1.320284 | 0.34248  | 3637433  |
| C1_12470W_A | 1.319592 | 0.730848 | 3648182  |
| MSS4        | 1.318105 | 0.266084 | 3647957  |
| TPK2        | 1.317052 | 0.272179 | 3643482  |
| C1_01530C_A | 1.317029 | 0.257796 | 3640232  |
| C1_08860C_A | 1.316231 | 0.423196 | 3634921  |
| GCN2        | 1.31592  | 0.421967 | 3645897  |
| HST1        | 1.315245 | 0.413432 | 3634770  |
| ZCF6        | 1.314383 | 0.489266 | 3635837  |
| C2_10300C_A | 1.313987 | 0.570043 | 3643955  |
| C2_00290W_A | 1.313566 | 0.566071 | 3638801  |
| C4_00420C_A | 1.313479 | 0.304886 | 3645021  |
| C2_05580W_A | 1.312232 | 0.347911 | 3645563  |
| BEM2        | 1.311463 | 0.345107 | 3637044  |
| PHO85       | 1.311193 | 0.316501 | 3646148  |
| C2_00320W_A | 1.310678 | 0.488575 | 3638798  |
| PRE8        | 1.310303 | 0.36452  | 3641906  |
| C1_07090C_A | 1.309384 | 0.357676 | 3639488  |
| C2_07290W_A | 1.309073 | 0.316637 | 3643476  |
| C1_10240C_A | 1.308642 | 0.496051 | 3634881  |
| CR_09840C_A | 1.307175 | 0.71872  | 3638988  |
| C2_02000W_A | 1.306561 | 0.304394 | 3635767  |

|             |          |          |          |
|-------------|----------|----------|----------|
| CCT3        | 1.305131 | 0.355631 | 3636458  |
| C1_08160W_A | 1.305055 | 0.381719 | 3640733  |
| TIF34       | 1.303537 | 0.245656 | 3636872  |
| VPS53       | 1.30257  | 0.356745 | 3639319  |
| TRP2        | 1.301666 | 0.404084 | 3640079  |
| C1_03910C_A | 1.301217 | 0.513189 | 3646412  |
| MED5        | 1.300308 | 0.428987 | 3648211  |
| PAP1        | 1.299731 | 0.388034 | 3643763  |
| CR_06850C_A | 1.298636 | 0.719427 | 30515424 |
| PTH2        | 1.298245 | 0.445068 | 3637709  |
| C4_04130W_A | 1.297343 | 0.443586 | 3641221  |
| RAD23       | 1.297239 | 0.325967 | 3635834  |
| BMT7        | 1.297016 | 0.611792 | 3638357  |
| ECM29       | 1.296235 | 0.353556 | 3638433  |
| CR_08430W_A | 1.292504 | 0.329837 | 3642120  |
| GIS2        | 1.290867 | 0.317069 | 3643744  |
| C2_04320W_A | 1.287474 | 0.526249 | 3648274  |
| C4_06740C_A | 1.287176 | 0.408825 | 3642923  |
| REX2        | 1.286781 | 0.537856 | 3635783  |
| ERF1        | 1.285624 | 0.360792 | 3643455  |
| C1_12120W_A | 1.285541 | 0.600008 | 3642053  |
| ARV1        | 1.284493 | 0.715978 | 3635248  |
| RPS27       | 1.284136 | 0.386909 | 30515429 |
| DFG10       | 1.283788 | 0.636441 | 3645786  |
| CR_06690C_A | 1.282652 | 0.471115 | 3646624  |
| PRE9        | 1.282526 | 0.405545 | 3638311  |
| RPC53       | 1.282297 | 0.510747 | 3637898  |
| MET8        | 1.281767 | 0.514483 | 3638533  |
| C4_06730C_A | 1.280952 | 0.302792 | 3642924  |
| C3_02490C_A | 1.280387 | 0.304101 | 3638351  |
| INO2        | 1.279788 | 0.534362 | 3639674  |
| C2_04180C_A | 1.279729 | 0.538606 | 3637330  |
| CR_09830W_A | 1.279616 | 0.654327 | 3638986  |
| C2_08990C_A | 1.279518 | 0.462239 | 3645783  |
| C7_03460W_A | 1.27942  | 0.715371 | 3646712  |
| CR_08300C_A | 1.278458 | 0.339667 | 3642076  |
| C1_02160W_A | 1.277015 | 0.614142 | 3644584  |
| C2_10120W_A | 1.275872 | 0.550629 | 3643936  |
| ALT1        | 1.275674 | 0.453725 | 3638307  |
| KIP4        | 1.27477  | 0.47783  | 3642032  |
| URA1        | 1.274539 | 0.264843 | 3634819  |
| CR_03690W_A | 1.274236 | 0.442108 | 3643222  |
| C2_05530C_A | 1.273948 | 0.357756 | 3643422  |
| C1_06420C_A | 1.273567 | 0.514916 | 3639554  |
| SNG4        | 1.273499 | 0.488082 | 3646714  |
| C1_08520C_A | 1.272927 | 0.585006 | 3646495  |
| AXL1        | 1.27211  | 0.446041 | 3641938  |



|             |          |          |          |
|-------------|----------|----------|----------|
| C4_04240C_A | 1.271565 | 0.436956 | 3646856  |
| PIN4        | 1.271149 | 0.436004 | 3640101  |
| HIR1        | 1.270531 | 0.351039 | 3638796  |
| C1_00910W_A | 1.270467 | 0.68845  | 3639284  |
| MNT2        | 1.268811 | 0.497349 | 3636583  |
| TSC2        | 1.267222 | 0.474743 | 3646953  |
| STB5        | 1.26605  | 0.499051 | 3640208  |
| C4_02670W_A | 1.265128 | 0.543311 | 3637830  |
| C6_00690W_A | 1.265116 | 0.559593 | 3647075  |
| MNN13       | 1.264996 | 0.626993 | 3637720  |
| GPD2        | 1.264899 | 0.420014 | 3644563  |
| DAD2        | 1.26466  | 0.681333 | 3643465  |
| RPL29       | 1.26401  | 0.378084 | 30515048 |
| C1_14560C_A | 1.263222 | 0.474906 | 3648376  |
| C4_03300C_A | 1.262654 | 0.807825 | 30515254 |
| THI4        | 1.262557 | 0.809967 | 3635160  |
| PEX14       | 1.262274 | 0.379537 | 3648208  |
| C6_02580W_A | 1.261768 | 0.538062 | 3639207  |
| PIN3        | 1.260916 | 0.411771 | 3635228  |
| C7_04240C_A | 1.258785 | 0.357154 | 3643165  |
| TIM54       | 1.258613 | 0.458667 | 3641349  |
| C3_02770C_A | 1.257414 | 0.453872 | 3638414  |
| CR_04300W_A | 1.253874 | 0.311804 | 3640995  |
| IFU5        | 1.253849 | 0.418952 | 3640116  |
| LAP4        | 1.251924 | 0.460937 | 3646979  |
| CR_04390C_A | 1.25131  | 0.443861 | 3640980  |
| PCD1        | 1.251124 | 0.417239 | 3647087  |
| C3_01800C_A | 1.25039  | 0.495951 | 3636586  |
| APE2        | 1.250006 | 0.356137 | 3647990  |
| CRM1        | 1.249744 | 0.371645 | 3639721  |
| TES15       | 1.249135 | 0.591172 | 3647478  |
| C3_06550C_A | 1.248707 | 0.533112 | 3642275  |
| RIM11       | 1.245598 | 0.399145 | 3648277  |
| HHT1        | 1.245499 | 0.369545 | 3638444  |
| FUR1        | 1.245228 | 0.495019 | 3646348  |
| CDC43       | 1.245184 | 0.655943 | 3648206  |
| PHR2        | 1.244012 | 0.391746 | 3639334  |
| KRE30       | 1.242085 | 0.376668 | 3642311  |
| C2_09480W_A | 1.241955 | 0.777239 | 3643819  |
| C2_06850W_A | 1.240677 | 0.657206 | 30515142 |
| SET1        | 1.239557 | 0.470628 | 3639280  |
| MNN15       | 1.235698 | 0.617271 | 3644794  |
| RPL30       | 1.235527 | 0.340262 | 30515273 |
| C2_10650W_A | 1.234591 | 0.759211 | 30515168 |
| C2_10060C_A | 1.234109 | 0.750813 | 3643948  |
| C2_10330C_A | 1.234022 | 0.752384 | 3643943  |
| C3_06150W_A | 1.233415 | 0.472942 | 3641765  |

|             |          |          |          |
|-------------|----------|----------|----------|
| C1_02800W_A | 1.233387 | 0.732793 | 3636873  |
| C7_01600W_A | 1.232546 | 0.52752  | 3637036  |
| C3_01690W_A | 1.232354 | 0.508503 | 3636604  |
| C6_04190C_A | 1.231435 | 0.791032 | 3646282  |
| C2_10870W_A | 1.230683 | 0.529028 | 3641234  |
| C6_01450C_A | 1.228518 | 0.492037 | 3641624  |
| C1_14040W_A | 1.227361 | 0.536037 | 3643342  |
| C2_00350W_A | 1.226434 | 0.551898 | 3638827  |
| ZCF16       | 1.225676 | 0.534097 | 3647395  |
| C6_02310W_A | 1.225581 | 0.525629 | 3645875  |
| C2_07200W_A | 1.225123 | 0.680976 | 3643481  |
| C3_02580C_A | 1.225108 | 0.679619 | 3638376  |
| BUD23       | 1.22437  | 0.614283 | 3642629  |
| C5_00550C_A | 1.224322 | 0.686822 | 3641535  |
| C4_02150C_A | 1.223664 | 0.674385 | 3635670  |
| C3_02760C_A | 1.222983 | 0.447853 | 3638413  |
| PRR2        | 1.222725 | 0.695685 | 3646723  |
| CR_04830C_A | 1.222692 | 0.66912  | 3647297  |
| C1_14200W_A | 1.22262  | 0.529521 | 3643301  |
| C3_00310C_A | 1.221076 | 0.615732 | 3640523  |
| CR_09040W_A | 1.219782 | 0.593154 | 3641894  |
| C1_08690W_A | 1.219731 | 0.589441 | 3634934  |
| C1_02720W_A | 1.21878  | 0.541819 | 3636825  |
| FLO9        | 1.218502 | 0.559724 | 3640581  |
| ZCF11       | 1.218074 | 0.543899 | 3645109  |
| C1_14520W_A | 1.218021 | 0.426491 | 3643332  |
| C3_05090C_A | 1.217698 | 0.531114 | 3635245  |
| SMF12       | 1.216974 | 0.504546 | 3643509  |
| RPS9B       | 1.216851 | 0.437557 | 30515104 |
| RPL7        | 1.215871 | 0.509956 | 6335362  |
| C1_03370W_A | 1.214902 | 0.452574 | 3636891  |
| RBT5        | 1.211776 | 0.508938 | 3645007  |
| EMP46       | 1.209183 | 0.514533 | 3645270  |
| TRY5        | 1.208543 | 0.643054 | 3641619  |
| COI1        | 1.207094 | 0.563488 | 3640721  |
| RPS28B      | 1.205657 | 0.470805 | 30515349 |
| MRS2        | 1.205583 | 0.673789 | 3640110  |
| C4_06170C_A | 1.204609 | 0.559171 | 3642818  |
| GAL7        | 1.202557 | 0.508075 | 3644591  |
| C1_04910C_A | 1.202461 | 0.536891 | 3644793  |
| SNU114      | 1.20029  | 0.526138 | 3647798  |
| C2_08630C_A | 1.200012 | 0.508779 | 3643910  |
| SLP2        | 1.199304 | 0.622798 | 3644091  |
| SPP1        | 1.198007 | 0.640809 | 3636897  |
| SYS1        | 1.197913 | 0.665302 | 3643138  |
| C5_03870C_A | 1.197305 | 0.626952 | 3647223  |
| EDC3        | 1.196603 | 0.63631  | 3646152  |

|             |          |          |          |
|-------------|----------|----------|----------|
| C5_02520W_A | 1.196554 | 0.763188 | 3637768  |
| COQ4        | 1.196531 | 0.575802 | 3636804  |
| C2_08830W_A | 1.196414 | 0.548924 | 3643894  |
| C7_04110W_A | 1.196385 | 0.576171 | 3643133  |
| C1_10630C_A | 1.195059 | 0.762889 | 3647683  |
| SPT3        | 1.194713 | 0.578909 | 3638977  |
| C1_01860W_A | 1.194664 | 0.537081 | 3645430  |
| C2_05760C_A | 1.194322 | 0.587143 | 3645578  |
| C2_04870C_A | 1.194268 | 0.429379 | 3648111  |
| C6_02800W_A | 1.194161 | 0.602723 | 3639246  |
| C1_08340C_A | 1.19413  | 0.662065 | 3640752  |
| C2_05080C_A | 1.191917 | 0.661328 | 3643453  |
| TRP1        | 1.191615 | 0.600677 | 3639321  |
| C2_04130W_A | 1.189793 | 0.552977 | 3637334  |
| C6_00230W_A | 1.189183 | 0.706521 | 3646061  |
| BIO32       | 1.188663 | 0.797028 | 3643430  |
| C2_02150C_A | 1.188496 | 0.537062 | 3635749  |
| CR_10500C_A | 1.187593 | 0.652674 | 3638982  |
| BZZ1        | 1.187563 | 0.516985 | 3636572  |
| FUN12       | 1.187485 | 0.489348 | 3640713  |
| C6_01960W_A | 1.187469 | 0.801026 | 3644559  |
| C1_13810W_A | 1.186514 | 0.63642  | 3636126  |
| C6_04260C_A | 1.186287 | 0.720949 | 3646277  |
| C4_02660W_A | 1.18617  | 0.830029 | 3637831  |
| PRE3        | 1.184759 | 0.531314 | 3643660  |
| TRR1        | 1.184481 | 0.520109 | 3637778  |
| CR_07870W_A | 1.183045 | 0.737456 | 3644146  |
| C4_05820W_A | 1.182009 | 0.736258 | 30515277 |
| C4_01790W_A | 1.181432 | 0.610529 | 3635597  |
| C1_03960C_A | 1.179418 | 0.656177 | 3646418  |
| PRE5        | 1.179319 | 0.573659 | 3643111  |
| C1_10190W_A | 1.178751 | 0.553445 | 3634785  |
| NUP84       | 1.178414 | 0.582497 | 3645351  |
| SIT4        | 1.177974 | 0.58679  | 3647993  |
| C4_06290W_A | 1.177488 | 0.825249 | 30515283 |
| C4_00290C_A | 1.177405 | 0.825054 | 3644994  |
| C1_05480C_A | 1.177391 | 0.828767 | 3642486  |
| CR_06100C_A | 1.177315 | 0.830416 | 3644842  |
| STT4        | 1.175832 | 0.520527 | 3647963  |
| C1_04620W_A | 1.175389 | 0.616951 | 3646135  |
| MIA40       | 1.175261 | 0.560522 | 3636866  |
| MNN22       | 1.174673 | 0.580857 | 3641117  |
| PGK1        | 1.174133 | 0.561394 | 3647081  |
| C4_03080W_A | 1.172126 | 0.554229 | 3637928  |
| C1_05750C_A | 1.172125 | 0.573228 | 3639891  |
| RVS167      | 1.170512 | 0.527807 | 3647831  |
| TEP1        | 1.170115 | 0.772544 | 3647653  |

|             |          |          |         |
|-------------|----------|----------|---------|
| C4_00700C_A | 1.169557 | 0.677152 | 3645751 |
| CR_00470W_A | 1.167799 | 0.545619 | 3639725 |
| C2_04790C_A | 1.167767 | 0.618303 | 3647779 |
| C3_07770C_A | 1.166913 | 0.696632 | 3647457 |
| C1_07080W_A | 1.166719 | 0.656382 | 3639489 |
| CR_09110C_A | 1.166305 | 0.646346 | 3641929 |
| ISN1        | 1.166137 | 0.601504 | 3640196 |
| RNR21       | 1.164529 | 0.621855 | 3643021 |
| SET6        | 1.164451 | 0.679694 | 3644590 |
| RTA3        | 1.163453 | 0.593735 | 3646566 |
| C5_05070W_A | 1.162822 | 0.681022 | 3636491 |
| SEN1        | 1.162801 | 0.615552 | 3635255 |
| C3_07280C_A | 1.162754 | 0.65451  | 3638431 |
| BFA1        | 1.162701 | 0.628664 | 3639301 |
| CR_05100W_A | 1.161897 | 0.676103 | 3646403 |
| C3_03260W_A | 1.161403 | 0.562575 | 3638320 |
| C6_00340C_A | 1.160489 | 0.671959 | 3646074 |
| C3_02160C_A | 1.158925 | 0.553057 | 3636654 |
| TIM22       | 1.158828 | 0.63346  | 3648168 |
| TRM9        | 1.158601 | 0.655036 | 3642074 |
| POS5        | 1.158352 | 0.608606 | 3638519 |
| COX13       | 1.157223 | 0.621867 | 3635784 |
| C5_04620C_A | 1.156748 | 0.7499   | 3636394 |
| C4_06800W_A | 1.156529 | 0.568212 | 3642917 |
| CLA4        | 1.155302 | 0.669711 | 3634878 |
| MLT1        | 1.154615 | 0.535575 | 3640748 |
| RPN10       | 1.154062 | 0.609348 | 3644080 |
| C7_01180W_A | 1.15389  | 0.652078 | 3645915 |
| HAL21       | 1.153835 | 0.603121 | 3644045 |
| SDS22       | 1.152338 | 0.598705 | 3637362 |
| C5_00600C_A | 1.151998 | 0.888993 | 3641586 |
| C2_05570C_A | 1.151543 | 0.707376 | 3645562 |
| C1_11930W_A | 1.15142  | 0.580023 | 3642002 |
| C4_00860C_A | 1.149983 | 0.67473  | 3635717 |
| PGA42       | 1.149421 | 0.886646 | 3642801 |
| C6_04080W_A | 1.148058 | 0.592088 | 3647837 |
| C4_01720C_A | 1.147979 | 0.559179 | 3635589 |
| CR_02430C_A | 1.146882 | 0.523707 | 3644924 |
| C6_03150C_A | 1.146698 | 0.675163 | 3639257 |
| C4_00050W_A | 1.146518 | 0.622581 | 3648060 |
| C6_03730C_A | 1.145866 | 0.675038 | 3640303 |
| CUE5        | 1.145502 | 0.557316 | 3642467 |
| RAD9        | 1.144314 | 0.689731 | 3637780 |
| CDS1        | 1.144082 | 0.588437 | 3647729 |
| C1_12350W_A | 1.143763 | 0.656823 | 3642063 |
| C1_13750C_A | 1.143306 | 0.841105 | 3636137 |
| C2_08910C_A | 1.143063 | 0.606472 | 3645798 |

|             |          |          |          |
|-------------|----------|----------|----------|
| C1_07210C_A | 1.142738 | 0.638599 | 3644473  |
| C2_04960C_A | 1.140529 | 0.773735 | 3643442  |
| MRR2        | 1.139212 | 0.656664 | 3647468  |
| CEF3        | 1.132895 | 0.6477   | 3647040  |
| RIM13       | 1.132625 | 0.702201 | 3636487  |
| UGP1        | 1.132538 | 0.578566 | 3648144  |
| CDC13       | 1.13218  | 0.795486 | 3639293  |
| CR_06640C_A | 1.131425 | 0.721816 | 3646619  |
| CR_06650C_A | 1.130652 | 0.759479 | 3646620  |
| CR_01780W_A | 1.129537 | 0.754126 | 3640157  |
| C3_02390W_A | 1.129378 | 0.808576 | 3636615  |
| C1_06640C_A | 1.128993 | 0.813415 | 30515010 |
| C7_04260W_A | 1.128888 | 0.640652 | 3643160  |
| C3_05120C_A | 1.128568 | 0.718493 | 3635159  |
| C2_07360W_A | 1.128258 | 0.756731 | 3645236  |
| CR_01020C_A | 1.126981 | 0.760609 | 3640420  |
| HXK1        | 1.126961 | 0.665337 | 3645964  |
| C1_02200C_A | 1.126949 | 0.754977 | 3644593  |
| TAF4        | 1.126728 | 0.663387 | 3645198  |
| CR_07200W_A | 1.126494 | 0.727598 | 3646044  |
| C5_02040W_A | 1.125759 | 0.680667 | 3643769  |
| CR_03760W_A | 1.125301 | 0.723602 | 3643178  |
| C2_00750W_A | 1.124729 | 0.838156 | 3638911  |
| SLF1        | 1.124252 | 0.747085 | 3638500  |
| C5_04890C_A | 1.123545 | 0.807073 | 3636415  |
| NPL6        | 1.122908 | 0.667274 | 3638883  |
| C2_03490C_A | 1.12057  | 0.729342 | 3637346  |
| CR_04460C_A | 1.119723 | 0.824306 | 3640988  |
| C2_07220W_A | 1.119175 | 0.676776 | 3643483  |
| CRG1        | 1.118019 | 0.703617 | 3646393  |
| HGC1        | 1.117207 | 0.769091 | 3639349  |
| MRR1        | 1.116285 | 0.739623 | 3641741  |
| RPT5        | 1.115269 | 0.65641  | 3642911  |
| C3_02930W_A | 1.114575 | 0.889949 | 3638380  |
| ERG1        | 1.113978 | 0.645026 | 3646509  |
| CR_03400W_A | 1.11393  | 0.763605 | 3645137  |
| MODF        | 1.113396 | 0.752419 | 3636182  |
| RPL9B       | 1.113375 | 0.669015 | 3638348  |
| C4_06410W_A | 1.112985 | 0.76047  | 3642796  |
| STE2        | 1.112579 | 0.886787 | 3646630  |
| C4_00500W_A | 1.112073 | 0.716405 | 3648379  |
| C7_00010C_A | 1.111929 | 0.736485 | 3638006  |
| RPO26       | 1.110924 | 0.710835 | 3646351  |
| CR_10830C_A | 1.110206 | 0.780562 | 3638960  |
| PRP3        | 1.109858 | 0.78598  | 3637406  |
| C1_04530C_A | 1.109195 | 0.759037 | 3646149  |
| C1_01070C_A | 1.10886  | 0.786098 | 3640172  |

|             |          |          |         |
|-------------|----------|----------|---------|
| C1_09440W_A | 1.108488 | 0.763101 | 3634857 |
| C5_05270C_A | 1.107964 | 0.750398 | 3636496 |
| C4_03560W_A | 1.107703 | 0.713744 | 3645373 |
| C2_09280C_A | 1.106875 | 0.755072 | 3644102 |
| C1_11560C_A | 1.106775 | 0.820612 | 3645331 |
| GLY1        | 1.106288 | 0.682316 | 3647181 |
| VID21       | 1.105159 | 0.699466 | 3642946 |
| RAD59       | 1.102178 | 0.849444 | 3648281 |
| ARG3        | 1.10212  | 0.875111 | 3639180 |
| C1_12810W_A | 1.10027  | 0.809222 | 3646827 |
| C5_00380W_A | 1.10022  | 0.801048 | 3641553 |
| C3_05430W_A | 1.099672 | 0.77013  | 3643667 |
| LYS143      | 1.099426 | 0.846508 | 3634894 |
| DRG1        | 1.09867  | 0.750628 | 3640714 |
| HIS4        | 1.09817  | 0.703508 | 3645025 |
| C5_02500C_A | 1.097637 | 0.765165 | 3637766 |
| C7_02690C_A | 1.096394 | 0.800073 | 3647649 |
| DTD2        | 1.095953 | 0.784317 | 3638390 |
| FKH2        | 1.095461 | 0.743556 | 3640536 |
| C1_01940C_A | 1.09531  | 0.84514  | 3645422 |
| RPL82       | 1.094993 | 0.760598 | 3644419 |
| C4_04250W_A | 1.094442 | 0.851659 | 3646855 |
| C5_02560C_A | 1.094157 | 0.733334 | 3637719 |
| CR_06030C_A | 1.093273 | 0.803199 | 3644874 |
| C6_04370W_A | 1.092343 | 0.807371 | 3646294 |
| CR_03240C_A | 1.091721 | 0.82679  | 3645126 |
| C1_10350C_A | 1.091534 | 0.780773 | 3634835 |
| MRS4        | 1.091016 | 0.810934 | 3642306 |
| AGC1        | 1.090587 | 0.744981 | 3636219 |
| C4_02860W_A | 1.090557 | 0.750373 | 3637909 |
| FGR39       | 1.09039  | 0.884972 | 3644529 |
| YOR1        | 1.090133 | 0.749363 | 3643964 |
| RPC40       | 1.090082 | 0.755038 | 3643427 |
| C1_06400C_A | 1.089968 | 0.738372 | 3639557 |
| C1_05010C_A | 1.089698 | 0.803326 | 3647532 |
| C1_02750C_A | 1.08925  | 0.735453 | 3636828 |
| C5_00050W_A | 1.089033 | 0.84239  | 3647875 |
| C3_02090C_A | 1.088854 | 0.819522 | 3636661 |
| GAR1        | 1.088233 | 0.74879  | 3645332 |
| ZDS1        | 1.08803  | 0.741387 | 3641103 |
| CR_06960W_A | 1.087607 | 0.792247 | 3645737 |
| C1_01390C_A | 1.085223 | 0.793546 | 3640236 |
| FGR14       | 1.085007 | 0.7567   | 3648083 |
| C1_06530C_A | 1.084455 | 0.750936 | 3639521 |
| MDL2        | 1.084027 | 0.78581  | 3639256 |
| MSU1        | 1.08047  | 0.867234 | 3643919 |
| C1_05610W_A | 1.080427 | 0.833629 | 3639843 |

|             |          |          |          |
|-------------|----------|----------|----------|
| CR_01550C_A | 1.080006 | 0.851127 | 3640074  |
| C7_00070C_A | 1.079821 | 0.76863  | 3638011  |
| PRP13       | 1.079314 | 0.766563 | 3643194  |
| C3_05380W_A | 1.079266 | 0.842715 | 3643679  |
| ZCF15       | 1.079079 | 0.791407 | 3637867  |
| YTM1        | 1.078785 | 0.784824 | 3634765  |
| C1_10410W_A | 1.078635 | 0.879071 | 3634840  |
| BCK1        | 1.078366 | 0.788617 | 3641384  |
| YPT52       | 1.074995 | 0.808863 | 3643346  |
| PRT1        | 1.074915 | 0.793437 | 3636959  |
| TRA1        | 1.074757 | 0.808081 | 3641644  |
| EAF7        | 1.074363 | 0.803185 | 3640973  |
| C2_08900W_A | 1.072914 | 0.866968 | 30515156 |
| C3_03590W_A | 1.072615 | 0.811269 | 3638302  |
| GLE2        | 1.072228 | 0.79855  | 3646293  |
| MET10       | 1.070622 | 0.763405 | 3644088  |
| C1_11140W_A | 1.070537 | 0.852333 | 3644410  |
| UGA33       | 1.070145 | 0.844792 | 3641886  |
| RPL42       | 1.070091 | 0.783921 | 30515041 |
| C2_01920C_A | 1.069181 | 0.811819 | 3635792  |
| HOS1        | 1.067666 | 0.881288 | 3646518  |
| IDI1        | 1.067436 | 0.824522 | 3637894  |
| GPH1        | 1.067323 | 0.804595 | 3637956  |
| QCR9        | 1.066664 | 0.85216  | 30515251 |
| CR_06250W_A | 1.066512 | 0.893074 | 3644852  |
| GCN5        | 1.065193 | 0.823449 | 3646626  |
| C1_03260W_A | 1.064146 | 0.871554 | 3636898  |
| C7_01960W_A | 1.063309 | 0.839697 | 3636969  |
| NOT4        | 1.062841 | 0.814465 | 3645115  |
| PUS4        | 1.062375 | 0.828595 | 3642661  |
| C1_04790W_A | 1.062181 | 0.857848 | 3644772  |
| EXO84       | 1.061847 | 0.846486 | 3644022  |
| MIM1        | 1.0613   | 0.857031 | 30515394 |
| C2_07920W_A | 1.060865 | 0.873404 | 3642294  |
| C1_12250C_A | 1.060767 | 0.81814  | 3642022  |
| HPA2        | 1.060743 | 0.86094  | 3647907  |
| C1_02410C_A | 1.060611 | 0.882403 | 3636793  |
| SKI2        | 1.059856 | 0.831491 | 3642143  |
| CR_10260W_A | 1.059069 | 0.904044 | 3638932  |
| C1_13370W_A | 1.058598 | 0.884978 | 3636216  |
| POX1        | 1.057339 | 0.838603 | 3640247  |
| C2_03800C_A | 1.056618 | 0.831535 | 3637401  |
| C1_04470C_A | 1.056457 | 0.919669 | 3646142  |
| SSK2        | 1.055969 | 0.83033  | 3641144  |
| C6_01520W_A | 1.055807 | 0.928843 | 3641617  |
| C6_02540C_A | 1.054791 | 0.926424 | 3639176  |
| C7_04120W_A | 1.054779 | 0.926023 | 3643132  |

|             |          |          |          |
|-------------|----------|----------|----------|
| C3_07470W_A | 1.05446  | 0.939214 | 3638479  |
| C6_01850W_A | 1.052995 | 0.852037 | 3641629  |
| YMX6        | 1.05221  | 0.887903 | 3640255  |
| SKO1        | 1.052035 | 0.843887 | 3644688  |
| OFR1        | 1.051369 | 0.883105 | 3640710  |
| EHT1        | 1.051001 | 0.864559 | 3636894  |
| BEM3        | 1.050966 | 0.862029 | 3637885  |
| C2_08390W_A | 1.050466 | 0.823807 | 3648252  |
| PRN2        | 1.050296 | 0.890179 | 3639879  |
| C1_06600W_A | 1.05005  | 0.836064 | 3639513  |
| TAF19       | 1.049988 | 0.895913 | 3641396  |
| CFL5        | 1.049054 | 0.935066 | 3642612  |
| PHO23       | 1.048562 | 0.873706 | 3643926  |
| SNM1        | 1.047869 | 0.903367 | 3642609  |
| FGR6-1      | 1.0478   | 0.951093 | 3647947  |
| C7_03620C_A | 1.045706 | 0.869309 | 3646242  |
| SLA2        | 1.045367 | 0.86238  | 3643149  |
| SRT1        | 1.044998 | 0.922075 | 3642020  |
| FCR3        | 1.044921 | 0.881899 | 3643760  |
| C1_11370C_A | 1.044565 | 0.898645 | 3644547  |
| SAM2        | 1.043465 | 0.899639 | 3644538  |
| C2_01230W_A | 1.042779 | 0.931639 | 3638795  |
| GSL2        | 1.042764 | 0.884062 | 3640410  |
| FGR43       | 1.041536 | 0.932161 | 3634828  |
| HGT8        | 1.041514 | 0.88428  | 3638875  |
| C6_02420W_A | 1.041001 | 0.891815 | 3645885  |
| C3_01260C_A | 1.040005 | 0.904383 | 3636625  |
| C2_10760C_A | 1.038661 | 0.88735  | 3641238  |
| GLC7        | 1.037344 | 0.864303 | 3647257  |
| PGA5        | 1.037233 | 0.971669 | 3644575  |
| C7_01010W_A | 1.03633  | 0.971117 | 3638021  |
| CR_06310W_A | 1.036324 | 0.971125 | 3644860  |
| C1_06000W_A | 1.036269 | 0.971599 | 3639870  |
| IFF11       | 1.036263 | 0.97121  | 3640580  |
| FET99       | 1.03625  | 0.971589 | 3647152  |
| C5_01870W_A | 1.036037 | 0.889276 | 3643752  |
| RAD2        | 1.035286 | 0.914001 | 3645374  |
| HSP60       | 1.034328 | 0.892001 | 3645275  |
| C2_05410W_A | 1.033967 | 0.894099 | 30515120 |
| C1_03100W_A | 1.033146 | 0.89096  | 3636925  |
| TIM50       | 1.032282 | 0.909727 | 3644530  |
| GCD1        | 1.031986 | 0.911404 | 3640965  |
| C5_04610W_A | 1.031693 | 0.906815 | 3636393  |
| C3_01170W_A | 1.031001 | 0.922171 | 3647958  |
| CTA3        | 1.029528 | 0.896721 | 3645333  |
| NAP1        | 1.029207 | 0.906321 | 3639714  |
| CR_09700W_A | 1.029171 | 0.941336 | 3647088  |



|             |          |          |          |
|-------------|----------|----------|----------|
| CGR1        | 1.029085 | 0.931963 | 3637853  |
| C4_04760C_A | 1.028821 | 0.930513 | 3641118  |
| PTC1        | 1.028528 | 0.93039  | 3634827  |
| C2_06300W_A | 1.026826 | 0.952758 | 3646924  |
| ARG83       | 1.026361 | 0.948067 | 3637862  |
| C4_06130W_A | 1.025553 | 0.920134 | 3648085  |
| RPL39       | 1.025527 | 0.926084 | 30515109 |
| C1_00660C_A | 1.024988 | 0.931718 | 3639376  |
| CR_06740W_A | 1.024814 | 0.949294 | 3646616  |
| C4_06770W_A | 1.024076 | 0.938732 | 3642920  |
| ECM14       | 1.02327  | 0.936048 | 3638392  |
| CGT1        | 1.023243 | 0.943506 | 3641808  |
| C3_03230C_A | 1.022403 | 0.942414 | 3638316  |
| PDC2        | 1.020826 | 0.956964 | 3634862  |
| CR_05330W_A | 1.020067 | 0.97388  | 30515404 |
| C3_05990C_A | 1.019831 | 0.973681 | 3641732  |
| C1_02210W_A | 1.019795 | 0.934091 | 3644594  |
| C2_08660C_A | 1.019753 | 0.973748 | 3643907  |
| C1_11970C_A | 1.019744 | 0.961483 | 3642044  |
| C4_05400C_A | 1.019379 | 0.948696 | 3646952  |
| C2_03830W_A | 1.019176 | 0.948465 | 3637399  |
| C2_00060C_A | 1.019123 | 0.942035 | 3647914  |
| C3_06260C_A | 1.018845 | 0.953261 | 3642240  |
| C7_01390W_A | 1.018055 | 0.98729  | 3645892  |
| GPI13       | 1.018048 | 0.963683 | 3637424  |
| ASH1        | 1.017549 | 0.960052 | 3641249  |
| GAL102      | 1.017041 | 0.954861 | 3644585  |
| MED21       | 1.016781 | 0.971644 | 3639010  |
| BUD31       | 1.016519 | 0.973054 | 3634796  |
| ABZ1        | 1.016143 | 0.948516 | 3648307  |
| C5_03010W_A | 1.014087 | 0.966518 | 3637819  |
| CBK1        | 1.013557 | 0.959043 | 3634838  |
| C7_00060C_A | 1.012607 | 0.971789 | 3638013  |
| CHS3        | 1.012572 | 0.959362 | 3636199  |
| C2_09710C_A | 1.011882 | 0.963634 | 3643786  |
| C5_04640C_A | 1.011553 | 0.957021 | 3636397  |
| ASR3        | 1.011462 | 0.969618 | 3637402  |
| HSP90       | 1.011323 | 0.965823 | 3636951  |
| C1_03990W_A | 1.011297 | 0.978399 | 3646424  |
| CR_08110W_A | 1.010852 | 0.980942 | 3642067  |
| SNO1        | 1.010833 | 0.977456 | 3636812  |
| CR_05140W_A | 1.009921 | 0.984663 | 3646400  |
| CR_07020W_A | 1.009807 | 0.970945 | 3645731  |
| ASG1        | 1.009336 | 0.97412  | 3647687  |
| SSN3        | 1.007956 | 0.980197 | 3637353  |
| TIF11       | 1.007319 | 0.975997 | 3641208  |
| CAF16       | 1.007256 | 0.978943 | 3646486  |

|             |          |          |          |
|-------------|----------|----------|----------|
| C2_10160W_A | 1.006902 | 0.991694 | 3643932  |
| C1_10340W_A | 1.005276 | 0.988483 | 3634909  |
| RPO21       | 1.00515  | 0.98369  | 3638991  |
| C4_03700W_A | 1.00453  | 0.988393 | 3645361  |
| C3_00170C_A | 1.004126 | 0.991618 | 3640589  |
| TIM9        | 1.004105 | 0.993036 | 3646243  |
| FAA2        | 1.003531 | 0.990616 | 3641731  |
| C1_08540C_A | 1.003188 | 0.990071 | 3646497  |
| CR_00630W_A | 1.002948 | 0.991246 | 3639690  |
| NOP5        | 1.002361 | 0.992538 | 3646084  |
| C4_02590C_A | 1.002091 | 0.995482 | 3637913  |
| C1_14470W_A | 1.001702 | 0.995639 | 3643327  |
| TIF35       | 1.001644 | 0.995218 | 3643308  |
| PES1        | 1.001289 | 0.996163 | 3644105  |
| CDL1        | 1.000832 | 0.997747 | 3641132  |
| C2_04380C_A | 1.00054  | 0.998661 | 3645459  |
| LPG20       | -1.00148 | 0.996416 | 3644780  |
| RPT2        | -1.00348 | 0.988954 | 3640525  |
| CR_10390W_A | -1.00413 | 0.993181 | 3638954  |
| HOS3        | -1.00505 | 0.98164  | 3637886  |
| GSC1        | -1.00523 | 0.98365  | 3636794  |
| MDS3        | -1.00542 | 0.983015 | 3638464  |
| PIM1        | -1.0058  | 0.97848  | 3640999  |
| C4_05210W_A | -1.00596 | 0.989311 | 3646154  |
| CR_01950W_A | -1.0065  | 0.981828 | 3640107  |
| PGA56       | -1.00658 | 0.980016 | 30515313 |
| RPC11       | -1.00696 | 0.987026 | 3641239  |
| C3_04370C_A | -1.00772 | 0.977555 | 3635172  |
| CR_10820W_A | -1.00785 | 0.98365  | 3638958  |
| C2_09690C_A | -1.00895 | 0.978166 | 3643789  |
| C1_12900W_A | -1.00925 | 0.980308 | 3636154  |
| C1_11670W_A | -1.01029 | 0.971186 | 3645338  |
| AKL1        | -1.01157 | 0.964813 | 3641237  |
| MCM3        | -1.01239 | 0.973342 | 3645223  |
| C2_03930C_A | -1.01334 | 0.965435 | 3637423  |
| C1_05230W_A | -1.01394 | 0.975481 | 3642463  |
| C6_00900C_A | -1.01414 | 0.976388 | 3644029  |
| C1_02030C_A | -1.01456 | 0.977934 | 3645415  |
| CR_02300C_A | -1.01565 | 0.954764 | 3644938  |
| C4_00800W_A | -1.01589 | 0.984507 | 3645757  |
| SPT10       | -1.01654 | 0.956682 | 3645729  |
| C1_02090C_A | -1.01661 | 0.962001 | 3644577  |
| HCM1        | -1.01741 | 0.98197  | 3634794  |
| C2_02290C_A | -1.01742 | 0.981847 | 3635807  |
| CR_06270W_A | -1.01742 | 0.981878 | 3644854  |
| SAP3        | -1.0175  | 0.98228  | 3635197  |
| C7_03860W_A | -1.01797 | 0.945263 | 3643144  |

|             |          |          |          |
|-------------|----------|----------|----------|
| ZFU2        | -1.01868 | 0.964809 | 3638534  |
| DOT5        | -1.01877 | 0.948165 | 3640519  |
| CIS2        | -1.01897 | 0.945886 | 3639366  |
| C7_02960C_A | -1.01969 | 0.958013 | 3641387  |
| FET33       | -1.0199  | 0.951591 | 3641544  |
| C6_04440C_A | -1.0206  | 0.946996 | 3645983  |
| C2_03140C_A | -1.02195 | 0.933674 | 3642992  |
| C5_02330W_A | -1.022   | 0.962462 | 3637789  |
| CR_04170W_A | -1.02274 | 0.921568 | 3640977  |
| C1_03280W_A | -1.02356 | 0.922448 | 3636901  |
| C6_02090C_A | -1.02383 | 0.936558 | 6335445  |
| ZCF13       | -1.02463 | 0.929357 | 3646354  |
| ALK2        | -1.02471 | 0.948465 | 3639700  |
| C3_02410C_A | -1.02599 | 0.93048  | 3638341  |
| COX15       | -1.02639 | 0.904365 | 3647071  |
| RAT1        | -1.02721 | 0.923144 | 3635686  |
| POL32       | -1.02757 | 0.930748 | 3639881  |
| C3_06490W_A | -1.02795 | 0.921201 | 3642285  |
| C7_00870W_A | -1.02898 | 0.954314 | 3638054  |
| FGR22       | -1.02898 | 0.954272 | 3635862  |
| TLO4        | -1.02978 | 0.956014 | 30515080 |
| C7_04200C_A | -1.02985 | 0.923915 | 3643122  |
| ATO1        | -1.0299  | 0.957254 | 3647761  |
| RPS19A      | -1.03167 | 0.895711 | 30515208 |
| C1_08760W_A | -1.03181 | 0.93395  | 3634787  |
| GSL1        | -1.03212 | 0.932114 | 3639844  |
| OPT2        | -1.03221 | 0.943518 | 3644915  |
| NTG1        | -1.03308 | 0.925609 | 3640746  |
| YIM1        | -1.03329 | 0.918078 | 3637372  |
| TIP120      | -1.03482 | 0.909057 | 3638494  |
| DFG5        | -1.03489 | 0.894621 | 3638867  |
| C2_09310C_A | -1.03505 | 0.936418 | 3644104  |
| C4_06440C_A | -1.03778 | 0.940701 | 3642793  |
| CR_04180C_A | -1.03793 | 0.882511 | 3640937  |
| C4_06090C_A | -1.03951 | 0.902493 | 3646532  |
| C7_02540W_A | -1.03956 | 0.916871 | 3636939  |
| DEM1        | -1.03972 | 0.919048 | 3643200  |
| BUR2        | -1.03983 | 0.914708 | 3637772  |
| FLC1        | -1.03985 | 0.858778 | 3639854  |
| LYP1        | -1.03985 | 0.931779 | 6335417  |
| C1_03950C_A | -1.04009 | 0.952246 | 3646417  |
| PSA2        | -1.04104 | 0.885084 | 3636159  |
| BMT6        | -1.04139 | 0.892485 | 3639258  |
| C7_01030C_A | -1.04171 | 0.874035 | 3638019  |
| HAL22       | -1.04181 | 0.901338 | 3644051  |
| CR_08590W_A | -1.04288 | 0.876203 | 3642106  |
| C1_05890W_A | -1.04383 | 0.981411 | 3639876  |

|             |          |          |          |
|-------------|----------|----------|----------|
| C2_00310W_A | -1.04383 | 0.981411 | 3638800  |
| C2_07870C_A | -1.04383 | 0.981411 | 3642319  |
| C5_03770C_A | -1.04383 | 0.981411 | 3647233  |
| C2_01800W_A | -1.04384 | 0.981409 | 30515092 |
| C3_01970C_A | -1.04384 | 0.981409 | 3636597  |
| C4_00730C_A | -1.04384 | 0.981409 | 3645765  |
| C4_03490C_A | -1.04384 | 0.981409 | 3646799  |
| C5_04140W_A | -1.04384 | 0.981409 | 3636524  |
| C7_02260W_A | -1.04384 | 0.981409 | 3637002  |
| CR_00530W_A | -1.04384 | 0.981409 | 3639668  |
| CR_01220W_A | -1.04384 | 0.981409 | 3640406  |
| CR_09350C_A | -1.04384 | 0.981409 | 3641901  |
| PGA22       | -1.04384 | 0.981409 | 3644939  |
| SCW4        | -1.04384 | 0.981409 | 3636797  |
| C1_10980W_A | -1.04384 | 0.981406 | 3644425  |
| C6_02620C_A | -1.04384 | 0.981406 | 3639211  |
| C7_02130W_A | -1.04384 | 0.981406 | 3636997  |
| FIG1        | -1.04384 | 0.981406 | 3644025  |
| DOA4        | -1.04473 | 0.865434 | 3643337  |
| C4_06430C_A | -1.04486 | 0.909533 | 3642794  |
| CR_01570W_A | -1.04504 | 0.929569 | 3640077  |
| VPS36       | -1.04555 | 0.88588  | 3637354  |
| IFG3        | -1.04623 | 0.900822 | 3641545  |
| FGR10       | -1.04753 | 0.923751 | 3641159  |
| C4_01300W_A | -1.04778 | 0.840056 | 3635605  |
| ATF1        | -1.04872 | 0.89687  | 3635273  |
| CR_04120C_A | -1.04879 | 0.913606 | 3640972  |
| MAF1        | -1.05153 | 0.853054 | 3642332  |
| RPT1        | -1.05171 | 0.836618 | 3642461  |
| C1_14080W_A | -1.05229 | 0.837337 | 3643345  |
| C6_04650W_A | -1.05275 | 0.828394 | 3645979  |
| MED7        | -1.05325 | 0.911782 | 3638344  |
| C7_02090C_A | -1.0533  | 0.892181 | 3637024  |
| POL5        | -1.05452 | 0.857206 | 3639254  |
| CR_05030W_A | -1.05459 | 0.848748 | 3646388  |
| GAP1        | -1.05461 | 0.817623 | 3637806  |
| C3_00270C_A | -1.0549  | 0.846285 | 3640527  |
| C4_06880C_A | -1.0556  | 0.865944 | 30515287 |
| CR_08550W_A | -1.05594 | 0.858677 | 3642141  |
| VPS34       | -1.05629 | 0.859953 | 3639540  |
| UFE1        | -1.05661 | 0.835836 | 3643174  |
| C5_02820C_A | -1.0572  | 0.857072 | 3637808  |
| C6_01000C_A | -1.0579  | 0.8806   | 3644048  |
| C1_06970C_A | -1.05812 | 0.843181 | 3639567  |
| MVD         | -1.05952 | 0.816077 | 3639306  |
| C7_03880C_A | -1.05999 | 0.909326 | 3643142  |
| SIK1        | -1.06059 | 0.79899  | 3638925  |

|             |          |          |          |
|-------------|----------|----------|----------|
| C2_06650C_A | -1.06072 | 0.886606 | 3648419  |
| CRZ1        | -1.06081 | 0.838325 | 3641722  |
| PLB2        | -1.06098 | 0.91358  | 3644562  |
| C2_02180W_A | -1.06163 | 0.853538 | 3635752  |
| DAP2        | -1.06194 | 0.862267 | 3637815  |
| MNN23       | -1.06208 | 0.826397 | 3634813  |
| C2_05710C_A | -1.06375 | 0.806426 | 30515127 |
| YPT7        | -1.06428 | 0.88874  | 3636864  |
| CTA6        | -1.06429 | 0.862465 | 3642907  |
| AVT1        | -1.06448 | 0.869039 | 3646928  |
| PCL7        | -1.06481 | 0.789089 | 3639491  |
| C1_14460W_A | -1.0652  | 0.77867  | 3643326  |
| SAM50       | -1.06525 | 0.895554 | 3641721  |
| C1_01470W_A | -1.06535 | 0.830139 | 3640241  |
| CR_04160C_A | -1.06675 | 0.819095 | 3640976  |
| C2_01490C_A | -1.06718 | 0.837554 | 3635800  |
| C7_00780W_A | -1.06771 | 0.848683 | 3637945  |
| C2_07620W_A | -1.06784 | 0.953827 | 3645194  |
| CTN1        | -1.06795 | 0.902939 | 3645414  |
| LAB5        | -1.06816 | 0.790025 | 3637893  |
| C1_10200C_A | -1.06915 | 0.835424 | 3634877  |
| C1_00430W_A | -1.06964 | 0.80485  | 3639285  |
| ORC1        | -1.0701  | 0.807826 | 3636922  |
| C4_04620C_A | -1.07025 | 0.936458 | 3641155  |
| C7_02850W_A | -1.07085 | 0.798988 | 3641399  |
| MED19       | -1.07148 | 0.824934 | 30515334 |
| SAC3        | -1.07176 | 0.806531 | 3635823  |
| NMA111      | -1.0722  | 0.755506 | 3640179  |
| MRPL10      | -1.07248 | 0.82149  | 3643446  |
| C3_05680W_A | -1.07345 | 0.831235 | 3641724  |
| CR_03220C_A | -1.07363 | 0.880728 | 3645128  |
| C1_03400W_A | -1.074   | 0.74944  | 3636904  |
| RPB4        | -1.07466 | 0.823134 | 3647800  |
| MET28       | -1.07568 | 0.787833 | 3637962  |
| CR_07480W_A | -1.07603 | 0.762316 | 3646047  |
| C1_02220C_A | -1.07729 | 0.815764 | 3644595  |
| GPR1        | -1.0777  | 0.833549 | 3642616  |
| CTA26       | -1.0779  | 0.808022 | 3638965  |
| C5_03470C_A | -1.07914 | 0.816539 | 3646963  |
| MET4        | -1.07961 | 0.77972  | 3641219  |
| PGA1        | -1.08003 | 0.859954 | 3638980  |
| CR_09240C_A | -1.08109 | 0.793505 | 3641919  |
| C1_01840C_A | -1.08121 | 0.788906 | 3645432  |
| C4_04550C_A | -1.08257 | 0.770566 | 3641106  |
| FGR28       | -1.08261 | 0.832109 | 3648315  |
| C1_04700C_A | -1.08265 | 0.781376 | 3644766  |
| CR_04280C_A | -1.0827  | 0.809074 | 3640993  |

|             |          |          |         |
|-------------|----------|----------|---------|
| GDI1        | -1.0842  | 0.753299 | 3643298 |
| HMT1        | -1.08422 | 0.772162 | 3640182 |
| UCF1        | -1.08437 | 0.77697  | 3648170 |
| SAP98       | -1.08455 | 0.831479 | 3637435 |
| C5_02480W_A | -1.0847  | 0.772765 | 3637762 |
| C5_04350C_A | -1.08518 | 0.79209  | 3636482 |
| C5_00100C_A | -1.08532 | 0.796218 | 3647883 |
| VPS22       | -1.08542 | 0.882517 | 3647250 |
| ISA1        | -1.08636 | 0.736197 | 3639174 |
| PRK1        | -1.08685 | 0.741964 | 3640153 |
| C1_10470W_A | -1.08783 | 0.774336 | 3647184 |
| C1_02900C_A | -1.0881  | 0.792359 | 3636869 |
| PAN1        | -1.08853 | 0.737356 | 3637386 |
| C1_00160C_A | -1.08867 | 0.720851 | 3639341 |
| YVH1        | -1.08899 | 0.793804 | 3643218 |
| MNN11       | -1.08903 | 0.834623 | 3636792 |
| C5_02360C_A | -1.08921 | 0.910807 | 3637792 |
| C4_02580W_A | -1.08926 | 0.911365 | 3637915 |
| C3_05330C_A | -1.08928 | 0.909928 | 3643650 |
| C5_01040W_A | -1.08929 | 0.911097 | 3642649 |
| FAV2        | -1.08986 | 0.935304 | 3647236 |
| C3_05760W_A | -1.09079 | 0.782464 | 3641720 |
| GCN20       | -1.0911  | 0.779935 | 3639314 |
| C4_01560C_A | -1.0917  | 0.785937 | 3635714 |
| PUT4        | -1.09262 | 0.851325 | 3636801 |
| NCP1        | -1.09268 | 0.751528 | 3637839 |
| C7_00810W_A | -1.09272 | 0.740992 | 3637940 |
| MEA1        | -1.09302 | 0.88397  | 3635154 |
| GLN4        | -1.09325 | 0.705354 | 3637998 |
| ESS1        | -1.09354 | 0.747264 | 3647989 |
| CR_10020C_A | -1.09487 | 0.848343 | 3639032 |
| MNT3        | -1.0962  | 0.805272 | 3648123 |
| C4_02880C_A | -1.09632 | 0.768467 | 3637907 |
| AGO1        | -1.0967  | 0.75493  | 3642828 |
| C4_00840W_A | -1.09682 | 0.708554 | 3635722 |
| CR_06510W_A | -1.09724 | 0.893112 | 3645264 |
| C4_01290W_A | -1.09867 | 0.709898 | 3635699 |
| MRPL3       | -1.10031 | 0.767361 | 3640722 |
| RBR3        | -1.10118 | 0.73601  | 3646728 |
| C5_04980W_A | -1.10124 | 0.809022 | 3636536 |
| SEC7        | -1.10166 | 0.698387 | 3635220 |
| PRS1        | -1.10223 | 0.696128 | 3635817 |
| C1_04630C_A | -1.1026  | 0.752365 | 3644762 |
| PTC2        | -1.10281 | 0.675558 | 3640105 |
| PDE1        | -1.10382 | 0.739559 | 3637713 |
| C2_01530C_A | -1.10401 | 0.64753  | 3635803 |
| C3_05320W_A | -1.10407 | 0.736015 | 3643648 |

|             |          |          |          |
|-------------|----------|----------|----------|
| C2_01760C_A | -1.10694 | 0.837136 | 3635736  |
| C2_01440C_A | -1.10701 | 0.834856 | 30515090 |
| C1_04990C_A | -1.10707 | 0.773078 | 3647530  |
| CR_01170W_A | -1.10771 | 0.690351 | 3640429  |
| C3_07660W_A | -1.10808 | 0.742845 | 3638462  |
| SKI3        | -1.10852 | 0.687928 | 3634847  |
| IRA2        | -1.10862 | 0.695103 | 3642011  |
| DBR1        | -1.10991 | 0.776431 | 3647560  |
| C4_03130W_A | -1.11087 | 0.73521  | 3637921  |
| RLP24       | -1.11107 | 0.714299 | 3645748  |
| CR_00570W_A | -1.11128 | 0.72692  | 3639664  |
| IRO1        | -1.11242 | 0.677425 | 3636648  |
| KIS2        | -1.11292 | 0.702649 | 3636211  |
| C1_13790C_A | -1.11353 | 0.802035 | 3636141  |
| C1_09310C_A | -1.11359 | 0.759564 | 3634833  |
| C7_02530C_A | -1.11465 | 0.721609 | 3636940  |
| C5_01920C_A | -1.11467 | 0.731128 | 3643742  |
| CBF1        | -1.11496 | 0.679117 | 3642779  |
| C3_00420W_A | -1.11537 | 0.714023 | 3640553  |
| C5_00140C_A | -1.11597 | 0.763721 | 3647873  |
| NRP1        | -1.11717 | 0.811665 | 3640698  |
| YML6        | -1.11795 | 0.73604  | 3637954  |
| YTA6        | -1.11812 | 0.639943 | 3638990  |
| SEC65       | -1.11929 | 0.690901 | 3640123  |
| C6_01220C_A | -1.12024 | 0.715028 | 3644042  |
| C1_09280W_A | -1.12065 | 0.714217 | 3634829  |
| SEC9        | -1.12102 | 0.64195  | 3644052  |
| ALP1        | -1.12172 | 0.649272 | 3644437  |
| GCD11       | -1.12204 | 0.643292 | 3637755  |
| RPA135      | -1.12249 | 0.678014 | 3637996  |
| RPS10       | -1.12373 | 0.578022 | 30515149 |
| USO6        | -1.12381 | 0.700989 | 3643647  |
| APN2        | -1.12401 | 0.7561   | 3647674  |
| SKN7        | -1.12406 | 0.699192 | 3641563  |
| MSF1        | -1.12425 | 0.681387 | 3638806  |
| C1_11680C_A | -1.12459 | 0.763508 | 30515056 |
| C4_05650W_A | -1.12518 | 0.702871 | 3641814  |
| CR_04750W_A | -1.12539 | 0.80804  | 30515399 |
| C2_10820C_A | -1.12632 | 0.671724 | 3641230  |
| FAD3        | -1.12671 | 0.717209 | 3636124  |
| NMD5        | -1.12676 | 0.662645 | 3645745  |
| C5_03480C_A | -1.12678 | 0.684587 | 3646965  |
| SFL2        | -1.12696 | 0.735133 | 3636434  |
| C2_07370W_A | -1.1288  | 0.695803 | 3645233  |
| C6_03530C_A | -1.12892 | 0.818643 | 3640260  |
| CR_04270C_A | -1.129   | 0.818784 | 3640992  |
| PUS7        | -1.12905 | 0.690539 | 3643960  |

|             |          |          |          |
|-------------|----------|----------|----------|
| C6_01550C_A | -1.13059 | 0.728163 | 3641653  |
| C6_01210W_A | -1.13105 | 0.688364 | 30515330 |
| LEM3        | -1.1323  | 0.690099 | 3643456  |
| UTP20       | -1.13275 | 0.688324 | 3647956  |
| C2_02490C_A | -1.13441 | 0.60456  | 3635815  |
| C1_08920W_A | -1.13496 | 0.70357  | 3634910  |
| C1_14310W_A | -1.1357  | 0.724371 | 3643315  |
| SEC15       | -1.13578 | 0.637906 | 3646845  |
| CR_05560W_A | -1.13578 | 0.678214 | 3647592  |
| TPO5        | -1.13591 | 0.730384 | 3647791  |
| SAP1        | -1.13639 | 0.834297 | 3640256  |
| AFL1        | -1.13647 | 0.574301 | 3641594  |
| CR_02940C_A | -1.13653 | 0.834882 | 3642589  |
| CR_10620C_A | -1.13954 | 0.627032 | 3639006  |
| C2_04400W_A | -1.1398  | 0.601538 | 3645457  |
| C7_00910C_A | -1.14036 | 0.740591 | 3637958  |
| CR_00230W_A | -1.14038 | 0.586156 | 3639698  |
| C5_01170W_A | -1.14047 | 0.773284 | 3642662  |
| LYS144      | -1.14139 | 0.661054 | 3640512  |
| C4_01130C_A | -1.14152 | 0.765473 | 3635682  |
| GYP8        | -1.14203 | 0.669939 | 3637750  |
| SWI1        | -1.14248 | 0.589801 | 3644996  |
| C2_07030C_A | -1.14288 | 0.687051 | 3643498  |
| C2_06430C_A | -1.14305 | 0.733082 | 3646558  |
| C3_05420W_A | -1.14354 | 0.659209 | 3643666  |
| C6_02450W_A | -1.14485 | 0.617261 | 3639167  |
| MPH1        | -1.1453  | 0.704111 | 3642817  |
| C2_06490W_A | -1.147   | 0.646734 | 3646569  |
| C5_04330W_A | -1.14721 | 0.715824 | 30515314 |
| HNH4        | -1.14722 | 0.846343 | 3636802  |
| NOC2        | -1.14774 | 0.604765 | 3647596  |
| C2_05960C_A | -1.14857 | 0.834568 | 3647479  |
| EST3        | -1.14859 | 0.833657 | 3640551  |
| CR_03070W_A | -1.14886 | 0.607582 | 3645105  |
| C1_05980W_A | -1.14931 | 0.66599  | 3639872  |
| C3_07420W_A | -1.15012 | 0.600306 | 3638485  |
| STE50       | -1.15121 | 0.635638 | 3636660  |
| MEP2        | -1.15233 | 0.741661 | 3645022  |
| KIS1        | -1.15312 | 0.604871 | 3644063  |
| FGR6-4      | -1.15313 | 0.680605 | 30515164 |
| C3_01670W_A | -1.15391 | 0.604059 | 3636606  |
| C5_00170W_A | -1.15414 | 0.617255 | 3647870  |
| HOL4        | -1.1548  | 0.545614 | 3645409  |
| SAP9        | -1.15549 | 0.594996 | 3645625  |
| MRPL8       | -1.15666 | 0.660326 | 3646039  |
| C3_07350W_A | -1.15716 | 0.610991 | 3638476  |
| KCH1        | -1.15787 | 0.703365 | 3636988  |



|             |          |          |          |
|-------------|----------|----------|----------|
| C2_07860W_A | -1.15864 | 0.628497 | 3642320  |
| CCR4        | -1.15999 | 0.522625 | 3640749  |
| MED4        | -1.16052 | 0.635503 | 3645209  |
| C2_07520C_A | -1.16063 | 0.626188 | 3645207  |
| C5_04720C_A | -1.16071 | 0.627503 | 3636518  |
| C3_03780W_A | -1.16088 | 0.792321 | 3645637  |
| SPA2        | -1.16113 | 0.509246 | 3646824  |
| GPI8        | -1.16252 | 0.613379 | 3646669  |
| C1_03620C_A | -1.16277 | 0.619452 | 30514981 |
| C1_03360W_A | -1.1637  | 0.540763 | 3636889  |
| PEP7        | -1.16377 | 0.679361 | 3645001  |
| C3_07690C_A | -1.16439 | 0.626522 | 3638458  |
| C2_08240W_A | -1.16517 | 0.542266 | 3642344  |
| C2_04740C_A | -1.16627 | 0.775572 | 3647786  |
| NAM7        | -1.16713 | 0.544158 | 3641540  |
| C3_01520C_A | -1.16808 | 0.563493 | 3636570  |
| GAL10       | -1.16968 | 0.513035 | 3644583  |
| C2_06230W_A | -1.1701  | 0.523307 | 3646911  |
| SNF1        | -1.17056 | 0.53282  | 3642643  |
| MED9        | -1.17068 | 0.645555 | 3643134  |
| C5_00260W_A | -1.17186 | 0.455135 | 3641561  |
| C1_07860W_A | -1.17198 | 0.838141 | 3640740  |
| C3_07240W_A | -1.17206 | 0.835417 | 3638530  |
| FGR32       | -1.1721  | 0.451865 | 3644136  |
| ATO9        | -1.17216 | 0.84323  | 3640392  |
| HYR3        | -1.17255 | 0.486622 | 3644119  |
| SSP96       | -1.17372 | 0.843974 | 3641401  |
| C3_03330C_A | -1.1738  | 0.561895 | 3638364  |
| RPP1        | -1.17443 | 0.736862 | 3644681  |
| C4_06450W_A | -1.17458 | 0.74001  | 3642792  |
| C2_00620C_A | -1.17506 | 0.70176  | 3638849  |
| CHS4        | -1.17553 | 0.502075 | 3641726  |
| SEC6        | -1.17617 | 0.519951 | 3640565  |
| PPS1        | -1.17622 | 0.709687 | 3646526  |
| HGT19       | -1.17644 | 0.558923 | 3640558  |
| C1_01180C_A | -1.17696 | 0.775596 | 3640206  |
| C3_04380C_A | -1.177   | 0.533309 | 3635173  |
| C1_07400C_A | -1.17772 | 0.643142 | 3644464  |
| C2_05540C_A | -1.17835 | 0.666687 | 3645559  |
| C2_08770C_A | -1.17948 | 0.717847 | 3643878  |
| TRS33       | -1.18168 | 0.688358 | 3636992  |
| TRM2        | -1.18258 | 0.630044 | 3640235  |
| NPR1        | -1.18313 | 0.554474 | 3639498  |
| MED22       | -1.18351 | 0.782866 | 3640217  |
| C3_02690C_A | -1.18367 | 0.636141 | 3638407  |
| YDJ1        | -1.18381 | 0.465435 | 3640939  |
| RBR2        | -1.18395 | 0.74906  | 3640983  |

|             |          |          |          |
|-------------|----------|----------|----------|
| HGH1        | -1.18496 | 0.579402 | 3635647  |
| C2_03780C_A | -1.18518 | 0.533344 | 3637368  |
| C7_02340C_A | -1.18564 | 0.606074 | 3636933  |
| CR_08280W_A | -1.18625 | 0.641836 | 3642102  |
| C2_00790C_A | -1.18634 | 0.627101 | 3638907  |
| HAP31       | -1.18767 | 0.725898 | 3640994  |
| C1_02770W_A | -1.18779 | 0.736733 | 30514973 |
| C2_05350C_A | -1.18779 | 0.736596 | 3643428  |
| CR_09310W_A | -1.18927 | 0.571427 | 3641923  |
| RAC1        | -1.18999 | 0.551216 | 3639508  |
| SPT23       | -1.19069 | 0.474843 | 3643958  |
| SRD1        | -1.19145 | 0.686571 | 3635764  |
| OPI1        | -1.19206 | 0.57044  | 3635777  |
| RPT6        | -1.19269 | 0.425884 | 3643877  |
| C1_08770W_A | -1.19383 | 0.559073 | 3634788  |
| HGT14       | -1.19389 | 0.601575 | 3648320  |
| ZCF31       | -1.19417 | 0.523312 | 3635191  |
| C1_14430C_A | -1.19476 | 0.556231 | 3643297  |
| C3_04230W_A | -1.19607 | 0.579936 | 3635187  |
| C4_07150W_A | -1.19634 | 0.732776 | 3642935  |
| C7_00940W_A | -1.19937 | 0.509696 | 3637955  |
| C3_06440W_A | -1.19953 | 0.438983 | 3642281  |
| SWD1        | -1.20139 | 0.58082  | 3640535  |
| DUO1        | -1.20234 | 0.6862   | 3646858  |
| C5_04870W_A | -1.20282 | 0.587069 | 3636438  |
| C1_05210C_A | -1.20316 | 0.570821 | 3642465  |
| C5_00040C_A | -1.20357 | 0.532528 | 3647874  |
| C3_02080W_A | -1.20357 | 0.552554 | 3636575  |
| CR_05710C_A | -1.20391 | 0.707352 | 3646700  |
| CR_03430W_A | -1.20401 | 0.707181 | 3645114  |
| C6_03550C_A | -1.20411 | 0.715439 | 3640246  |
| C1_04600C_A | -1.20557 | 0.513041 | 3646133  |
| C3_07600W_A | -1.20557 | 0.568667 | 3638495  |
| CR_08330W_A | -1.20583 | 0.54376  | 3642080  |
| C5_02830W_A | -1.20618 | 0.519163 | 3637809  |
| C2_01050W_A | -1.20627 | 0.734967 | 30515086 |
| CR_06090W_A | -1.20761 | 0.493849 | 6335359  |
| MIH1        | -1.20843 | 0.439857 | 3648188  |
| NUP60       | -1.20922 | 0.464292 | 3642826  |
| CYM1        | -1.2097  | 0.425694 | 3642244  |
| ZCF23       | -1.21001 | 0.520373 | 3644477  |
| C2_00420W_A | -1.21158 | 0.486606 | 3638819  |
| C2_09460C_A | -1.21183 | 0.448381 | 3647713  |
| C1_00970W_A | -1.21197 | 0.774736 | 30514958 |
| ALG1        | -1.21265 | 0.584425 | 3646517  |
| C4_01820C_A | -1.21425 | 0.477434 | 3635594  |
| CR_03780C_A | -1.21548 | 0.685907 | 3643179  |

|             |          |          |         |
|-------------|----------|----------|---------|
| C1_00890W_A | -1.21602 | 0.530165 | 3639354 |
| UTP13       | -1.21631 | 0.442684 | 3637718 |
| C5_00250C_A | -1.21639 | 0.669399 | 3641562 |
| PRC2        | -1.21715 | 0.57052  | 3647044 |
| HRQ2        | -1.21985 | 0.516307 | 3647850 |
| C2_02540W_A | -1.22144 | 0.471471 | 3635820 |
| CR_09140C_A | -1.22155 | 0.456939 | 3641879 |
| CWC22       | -1.22192 | 0.590131 | 3643938 |
| CR_10740W_A | -1.22316 | 0.528147 | 3638941 |
| HAC1        | -1.2234  | 0.484982 | 3639849 |
| KAP120      | -1.22461 | 0.338211 | 3643110 |
| C1_12710C_A | -1.22531 | 0.497765 | 3646822 |
| ARO1        | -1.22581 | 0.34638  | 3635680 |
| MED8        | -1.22655 | 0.653617 | 3645446 |
| C3_03530W_A | -1.22773 | 0.721187 | 3638312 |
| C5_02660C_A | -1.22864 | 0.485146 | 3637771 |
| DCR1        | -1.22887 | 0.49301  | 3641164 |
| C1_00880W_A | -1.22958 | 0.563952 | 3639355 |
| NOT3        | -1.23061 | 0.442706 | 3638829 |
| C4_03750C_A | -1.23124 | 0.596253 | 3645356 |
| RRP6        | -1.23139 | 0.486097 | 3647535 |
| CR_03310C_A | -1.23335 | 0.392411 | 3645097 |
| SCS7        | -1.23355 | 0.389008 | 3641157 |
| LIP9        | -1.23455 | 0.833797 | 3641395 |
| C4_02210W_A | -1.23456 | 0.829521 | 3635695 |
| CR_02440W_A | -1.23457 | 0.737121 | 3644923 |
| PGA58       | -1.23464 | 0.831801 | 3637826 |
| C3_04170W_A | -1.23465 | 0.831549 | 3635182 |
| C5_00510W_A | -1.23465 | 0.833825 | 3641539 |
| C6_03070C_A | -1.23465 | 0.833774 | 3639272 |
| PGA27       | -1.23475 | 0.666783 | 3638811 |
| CR_07250C_A | -1.23478 | 0.480105 | 3646028 |
| C5_00330C_A | -1.23534 | 0.464231 | 3641556 |
| C7_00830C_A | -1.23602 | 0.395086 | 3637938 |
| CDR3        | -1.23634 | 0.64274  | 3645365 |
| CR_03230W_A | -1.23726 | 0.484095 | 3645127 |
| C4_00880W_A | -1.23731 | 0.506873 | 3635681 |
| VPS17       | -1.23765 | 0.441203 | 3640218 |
| PEX13       | -1.23818 | 0.42656  | 3641877 |
| PUT3        | -1.2387  | 0.423026 | 3639535 |
| C4_03140C_A | -1.23896 | 0.557337 | 3637843 |
| CSI2        | -1.23916 | 0.506489 | 3642016 |
| C1_08470W_A | -1.24212 | 0.619562 | 3646490 |
| C1_13650C_A | -1.24222 | 0.525291 | 3636191 |
| SCT1        | -1.24291 | 0.459711 | 3648346 |
| C4_00950C_A | -1.24311 | 0.439952 | 3635675 |
| IME2        | -1.24352 | 0.833454 | 3645099 |

|             |          |          |         |
|-------------|----------|----------|---------|
| C7_00130W_A | -1.24429 | 0.477965 | 3637975 |
| C2_03530W_A | -1.24443 | 0.447552 | 3637341 |
| MKC1        | -1.2448  | 0.366964 | 3639710 |
| C4_06210C_A | -1.24603 | 0.399383 | 3642815 |
| DJP1        | -1.24727 | 0.394936 | 3647186 |
| CR_07820W_A | -1.24913 | 0.693128 | 3647344 |
| FGR27       | -1.25016 | 0.458403 | 3646988 |
| STR2        | -1.25051 | 0.438555 | 3644689 |
| C5_02620C_A | -1.25242 | 0.403355 | 3637783 |
| MET16       | -1.25282 | 0.445228 | 3642964 |
| C4_06650W_A | -1.25295 | 0.381727 | 3642810 |
| C3_07380W_A | -1.25379 | 0.436612 | 3638473 |
| JAB1        | -1.25481 | 0.414679 | 3646811 |
| C3_04120C_A | -1.25633 | 0.550117 | 3635282 |
| C5_02730C_A | -1.25677 | 0.413316 | 3637738 |
| C6_03380W_A | -1.25687 | 0.426808 | 3639231 |
| SUI2        | -1.25745 | 0.350693 | 3639569 |
| C1_03450C_A | -1.25851 | 0.37516  | 3636910 |
| YPS7        | -1.26112 | 0.452805 | 3636937 |
| NOP15       | -1.26156 | 0.45945  | 3637966 |
| C1_14450C_A | -1.26189 | 0.416525 | 3643299 |
| PWP1        | -1.26265 | 0.42028  | 3635623 |
| C4_03830W_A | -1.26288 | 0.426664 | 3647851 |
| C5_02140C_A | -1.26399 | 0.433028 | 3637752 |
| C7_00030W_A | -1.26409 | 0.444253 | 3638004 |
| C3_05970C_A | -1.26637 | 0.375952 | 3641730 |
| C1_11790W_A | -1.26698 | 0.634339 | 3645326 |
| C3_07170C_A | -1.26816 | 0.344472 | 3638536 |
| C4_04120C_A | -1.26835 | 0.427158 | 3641222 |
| C2_00860C_A | -1.2684  | 0.765906 | 3638805 |
| C2_00890W_A | -1.26855 | 0.76358  | 3638896 |
| ZPR1        | -1.26936 | 0.258754 | 3640177 |
| VPS20       | -1.26981 | 0.570262 | 3637427 |
| RPS42       | -1.26988 | 0.448428 | 3640195 |
| ZRT1        | -1.27198 | 0.776571 | 3642970 |
| C2_08420W_A | -1.27276 | 0.603072 | 3643897 |
| C3_07100C_A | -1.2735  | 0.380355 | 3638443 |
| CAS4        | -1.27527 | 0.456261 | 3636568 |
| C3_03540W_A | -1.27537 | 0.376242 | 3638313 |
| C7_00450C_A | -1.27634 | 0.493072 | 3637991 |
| C6_01920C_A | -1.27677 | 0.39736  | 3644534 |
| C2_04620W_A | -1.27685 | 0.273376 | 3645438 |
| C1_07390W_A | -1.27702 | 0.295293 | 3644466 |
| KIC1        | -1.27744 | 0.375965 | 3647784 |
| CR_00010C_A | -1.27819 | 0.355856 | 3639712 |
| CR_06040W_A | -1.27819 | 0.334225 | 3644836 |
| C2_00270C_A | -1.27881 | 0.472596 | 3638803 |

|             |          |          |         |
|-------------|----------|----------|---------|
| BNI1        | -1.27896 | 0.322941 | 3636118 |
| PHO8        | -1.28109 | 0.71481  | 3647179 |
| TIF4631     | -1.28136 | 0.311982 | 3643880 |
| ECM18       | -1.28248 | 0.707422 | 3645655 |
| CR_10380C_A | -1.28263 | 0.701311 | 3638953 |
| C4_00850C_A | -1.28271 | 0.706417 | 3635718 |
| APC1        | -1.28273 | 0.374189 | 3639383 |
| TAC1        | -1.28422 | 0.365772 | 3643755 |
| DOS2        | -1.28422 | 0.391723 | 3636183 |
| HAS1        | -1.28552 | 0.25258  | 3636443 |
| TIF3        | -1.28572 | 0.367962 | 3641646 |
| C1_12280C_A | -1.2861  | 0.672134 | 3642019 |
| C4_00470C_A | -1.28664 | 0.331585 | 3645011 |
| GLK1        | -1.28864 | 0.329479 | 3648348 |
| C3_06050C_A | -1.28865 | 0.465143 | 3641746 |
| C1_12530C_A | -1.28899 | 0.545326 | 3647608 |
| C1_01040W_A | -1.2897  | 0.48848  | 3640183 |
| C3_03100C_A | -1.28975 | 0.347821 | 3638399 |
| C2_02720W_A | -1.29005 | 0.339055 | 3643002 |
| CEM1        | -1.2941  | 0.467621 | 3635242 |
| C4_00560C_A | -1.29411 | 0.39371  | 3645744 |
| C1_00530C_A | -1.29412 | 0.348005 | 3639368 |
| PGM2        | -1.29415 | 0.273287 | 3642562 |
| NCE102      | -1.29464 | 0.329383 | 3635267 |
| ALO1        | -1.29491 | 0.281705 | 3638983 |
| YEA4        | -1.29518 | 0.643712 | 3643787 |
| C2_05490W_A | -1.29519 | 0.643718 | 3643417 |
| GPI2        | -1.29529 | 0.64241  | 3641011 |
| CDC39       | -1.29557 | 0.235273 | 3646278 |
| C5_01930W_A | -1.29603 | 0.397932 | 3643741 |
| EAP1        | -1.29696 | 0.352328 | 3643814 |
| C5_03040W_A | -1.29878 | 0.444559 | 3637824 |
| CR_04140W_A | -1.29889 | 0.344198 | 3640974 |
| WAL1        | -1.29984 | 0.25957  | 3647093 |
| TEL1        | -1.30065 | 0.440034 | 3639263 |
| HYR4        | -1.30142 | 0.335288 | 3640436 |
| TPS1        | -1.30153 | 0.29898  | 3646699 |
| C2_06440C_A | -1.30294 | 0.368643 | 3646565 |
| XOG1        | -1.30413 | 0.431735 | 3636837 |
| CR_02590C_A | -1.30432 | 0.402281 | 3642595 |
| C4_04510W_A | -1.30506 | 0.234354 | 3641120 |
| C2_08510W_A | -1.30632 | 0.600579 | 3643922 |
| C2_07240C_A | -1.30639 | 0.706979 | 3643486 |
| ECM38       | -1.30646 | 0.54049  | 3645375 |
| C4_03680C_A | -1.30687 | 0.545251 | 3645363 |
| CR_04240C_A | -1.30749 | 0.297496 | 3640989 |
| C6_00390W_A | -1.3083  | 0.340779 | 3646086 |

|             |          |          |          |
|-------------|----------|----------|----------|
| C1_13240W_A | -1.30943 | 0.325729 | 3636167  |
| VPS70       | -1.30945 | 0.407432 | 3637971  |
| C5_05090W_A | -1.30961 | 0.474719 | 3636493  |
| C4_02450W_A | -1.3099  | 0.439693 | 3637845  |
| POT1-2      | -1.30992 | 0.461362 | 3638908  |
| C4_06370C_A | -1.31012 | 0.463382 | 3642824  |
| ARX1        | -1.3102  | 0.213896 | 3636811  |
| C2_00820W_A | -1.31191 | 0.401668 | 3638809  |
| YCK2        | -1.31229 | 0.307598 | 3643655  |
| C3_03070W_A | -1.31317 | 0.401199 | 3638396  |
| GCD6        | -1.31506 | 0.333843 | 3646510  |
| C3_06280W_A | -1.31507 | 0.315318 | 3642238  |
| LIG4        | -1.3153  | 0.326627 | 3642986  |
| C3_04410C_A | -1.31567 | 0.290754 | 3635178  |
| PIF1        | -1.31569 | 0.329283 | 3646054  |
| C2_01070W_A | -1.31658 | 0.325267 | 3638834  |
| CR_03940W_A | -1.31692 | 0.36873  | 3648378  |
| YUH2        | -1.31913 | 0.34044  | 3636412  |
| C7_01230C_A | -1.31942 | 0.313303 | 3645906  |
| ZCF8        | -1.32178 | 0.355093 | 3636651  |
| C4_05260W_A | -1.32242 | 0.350726 | 3648282  |
| CAN1        | -1.32284 | 0.354815 | 3644035  |
| C7_00430W_A | -1.32293 | 0.326215 | 3637993  |
| ERG25       | -1.32402 | 0.396755 | 3644933  |
| CR_02460W_A | -1.32558 | 0.293239 | 3644922  |
| C6_03390W_A | -1.32583 | 0.372833 | 3639232  |
| C1_13840W_A | -1.32588 | 0.237604 | 3636129  |
| CUP1        | -1.32668 | 0.414351 | 30515318 |
| TTR1        | -1.32815 | 0.381848 | 3639313  |
| C5_04340W_A | -1.32968 | 0.532955 | 3636481  |
| C2_06080C_A | -1.33039 | 0.339719 | 3644098  |
| CR_08710W_A | -1.33062 | 0.197917 | 3642131  |
| GCD2        | -1.33118 | 0.298209 | 3638437  |
| ZNC1        | -1.33135 | 0.260221 | 3643754  |
| SFC1        | -1.33211 | 0.467339 | 3636413  |
| C1_11270W_A | -1.333   | 0.300558 | 3644555  |
| C2_02040W_A | -1.33417 | 0.27767  | 3635848  |
| PRO1        | -1.33485 | 0.263213 | 3639000  |
| HEX1        | -1.33501 | 0.336325 | 3646981  |
| C4_00740W_A | -1.33694 | 0.555986 | 3645764  |
| C1_02380C_A | -1.33705 | 0.55451  | 3636790  |
| C1_01090C_A | -1.33729 | 0.434592 | 3640174  |
| C2_02420C_A | -1.33736 | 0.333938 | 3635756  |
| C2_04500W_A | -1.33799 | 0.337609 | 3645462  |
| C5_00090C_A | -1.33855 | 0.34111  | 3647885  |
| RPL40B      | -1.33943 | 0.236055 | 30515232 |
| CR_10610C_A | -1.34047 | 0.569326 | 3639005  |

|             |          |          |          |
|-------------|----------|----------|----------|
| C6_03590C_A | -1.3406  | 0.468933 | 3640251  |
| PGA25       | -1.34207 | 0.325623 | 3647890  |
| CAS5        | -1.34266 | 0.333046 | 3635652  |
| HAP5        | -1.34299 | 0.303747 | 3642654  |
| C6_01490C_A | -1.34473 | 0.604083 | 3641620  |
| C4_07200C_A | -1.34514 | 0.341089 | 3642958  |
| CR_03960C_A | -1.34621 | 0.469766 | 3640963  |
| C7_04140C_A | -1.34699 | 0.260385 | 3643129  |
| SFL1        | -1.34744 | 0.189449 | 3642498  |
| RLI1        | -1.34749 | 0.297496 | 3636888  |
| C1_06770W_A | -1.34929 | 0.275105 | 3639504  |
| TAF145      | -1.3507  | 0.153915 | 3639486  |
| IMH3        | -1.35077 | 0.231762 | 3646556  |
| C7_03980W_A | -1.35184 | 0.410421 | 3643116  |
| C2_09860C_A | -1.35366 | 0.513423 | 3643781  |
| C1_05800C_A | -1.354   | 0.481123 | 3639887  |
| C2_05380W_A | -1.3546  | 0.310099 | 3643432  |
| C2_04730W_A | -1.35723 | 0.329722 | 3647787  |
| C1_05380C_A | -1.35735 | 0.355245 | 3642480  |
| FUR4        | -1.35777 | 0.498633 | 3638305  |
| C2_03950W_A | -1.3578  | 0.401677 | 3637420  |
| C3_00950C_A | -1.35804 | 0.407463 | 3639852  |
| FMP27       | -1.36082 | 0.259161 | 3641645  |
| DAL81       | -1.3613  | 0.363585 | 3640419  |
| C3_00400C_A | -1.36152 | 0.328023 | 3640554  |
| C1_04850C_A | -1.36185 | 0.648923 | 30514989 |
| DUR4        | -1.36203 | 0.416489 | 3645012  |
| GST3        | -1.36204 | 0.653372 | 3645278  |
| ULP2        | -1.36371 | 0.287214 | 3643196  |
| C4_03850W_A | -1.3648  | 0.180592 | 3647853  |
| TSM1        | -1.36521 | 0.209262 | 3645953  |
| DUR7        | -1.36711 | 0.357929 | 3643335  |
| CR_10230W_A | -1.36716 | 0.204354 | 3638921  |
| C6_03300C_A | -1.36766 | 0.235224 | 3639196  |
| C3_05940C_A | -1.36787 | 0.504768 | 3641744  |
| SUA72       | -1.36797 | 0.505055 | 3648239  |
| RAD18       | -1.36801 | 0.476119 | 3641637  |
| CR_03350C_A | -1.36804 | 0.295307 | 3645142  |
| C1_05360C_A | -1.36935 | 0.292701 | 3642482  |
| C1_01540W_A | -1.36997 | 0.274365 | 3640233  |
| C3_01850W_A | -1.37024 | 0.355478 | 3636565  |
| C2_00740C_A | -1.37031 | 0.24163  | 3638912  |
| C6_03540W_A | -1.37168 | 0.308858 | 3640244  |
| PFK2        | -1.37303 | 0.25462  | 3637056  |
| SOL1        | -1.37463 | 0.326136 | 3645627  |
| MRP7        | -1.3747  | 0.394895 | 3643118  |
| YAF9        | -1.37586 | 0.336113 | 3647864  |

|             |          |          |          |
|-------------|----------|----------|----------|
| C3_02720W_A | -1.37671 | 0.367405 | 3638410  |
| C5_01610W_A | -1.37874 | 0.356213 | 3647251  |
| SNF7        | -1.37994 | 0.180472 | 3639377  |
| C5_00320W_A | -1.38073 | 0.394071 | 30515291 |
| C7_00460W_A | -1.38206 | 0.678236 | 3637990  |
| C2_02230C_A | -1.38216 | 0.680504 | 3635775  |
| CR_01790C_A | -1.38304 | 0.363273 | 3640161  |
| CR_00110W_A | -1.38304 | 0.199308 | 3639731  |
| C1_03830C_A | -1.38427 | 0.277401 | 3644678  |
| C1_09220W_A | -1.38431 | 0.238194 | 3634898  |
| C4_01090C_A | -1.38464 | 0.477583 | 3635685  |
| C2_05160C_A | -1.38495 | 0.133275 | 3643461  |
| C1_00510W_A | -1.38564 | 0.290794 | 3639311  |
| C1_12820C_A | -1.38579 | 0.281756 | 3646826  |
| CR_10730C_A | -1.38637 | 0.221759 | 3638998  |
| C4_06590W_A | -1.38638 | 0.486637 | 3642778  |
| CTA9        | -1.38687 | 0.249308 | 3640215  |
| GNP1        | -1.38698 | 0.260328 | 3646073  |
| COX9        | -1.38776 | 0.236939 | 30515131 |
| C4_05980C_A | -1.38884 | 0.301286 | 3646516  |
| C1_03330C_A | -1.38929 | 0.299928 | 3636859  |
| C7_00610C_A | -1.38979 | 0.239357 | 3638030  |
| CR_01770C_A | -1.39013 | 0.166927 | 3640122  |
| MSS11       | -1.39082 | 0.350259 | 3647296  |
| C3_04690C_A | -1.39115 | 0.443731 | 3635196  |
| C3_00510W_A | -1.39129 | 0.450849 | 3640514  |
| CR_01410C_A | -1.39216 | 0.293565 | 3640136  |
| C5_03940C_A | -1.39255 | 0.307008 | 3647446  |
| C1_12540W_A | -1.39289 | 0.465886 | 3647607  |
| C1_05650W_A | -1.39523 | 0.343316 | 3639838  |
| C7_01370W_A | -1.39695 | 0.484014 | 3645901  |
| C5_02740W_A | -1.39731 | 0.348072 | 3637739  |
| CR_00340C_A | -1.39818 | 0.557002 | 30515365 |
| BUD2        | -1.39992 | 0.25806  | 3641541  |
| VID27       | -1.40098 | 0.143006 | 3647894  |
| HMI1        | -1.40158 | 0.262256 | 3638997  |
| C4_04020C_A | -1.40173 | 0.597245 | 3641215  |
| C1_08900W_A | -1.40283 | 0.477173 | 3634925  |
| C3_07590W_A | -1.40289 | 0.4508   | 3638496  |
| RPA190      | -1.40372 | 0.2417   | 3647677  |
| CRL1        | -1.40398 | 0.208594 | 3640238  |
| CRH12       | -1.40466 | 0.159612 | 3636447  |
| C4_06230C_A | -1.40524 | 0.188488 | 3642808  |
| C5_01310W_A | -1.40566 | 0.510769 | 3642645  |
| MAS2        | -1.40604 | 0.247337 | 3647249  |
| C3_05020W_A | -1.40645 | 0.421956 | 3635170  |
| GPX2        | -1.4098  | 0.345824 | 3644009  |



|             |          |          |          |
|-------------|----------|----------|----------|
| C2_01030W_A | -1.4102  | 0.258283 | 3638836  |
| ZCF18       | -1.41092 | 0.294514 | 3641635  |
| C4_04820C_A | -1.41096 | 0.366881 | 3641165  |
| SLK19       | -1.4118  | 0.19365  | 3638466  |
| RLM1        | -1.41205 | 0.242597 | 3635703  |
| DIM1        | -1.41247 | 0.365634 | 3636135  |
| C4_00580W_A | -1.41322 | 0.362535 | 3645773  |
| C2_08100W_A | -1.4141  | 0.225587 | 3642334  |
| C3_06040W_A | -1.41522 | 0.472754 | 3641745  |
| C3_05140C_A | -1.41574 | 0.264343 | 3635161  |
| C1_04490W_A | -1.41586 | 0.235668 | 3646145  |
| HST6        | -1.41789 | 0.754201 | 3642288  |
| BUD6        | -1.41854 | 0.181266 | 3640727  |
| C2_07430C_A | -1.42031 | 0.297592 | 3645201  |
| C4_02700W_A | -1.42042 | 0.236321 | 3637859  |
| KRR1        | -1.42063 | 0.228057 | 3644542  |
| GCN3        | -1.42079 | 0.246261 | 3645905  |
| GDH2        | -1.42097 | 0.21644  | 3642295  |
| C6_01890C_A | -1.421   | 0.21949  | 3641598  |
| HSM3        | -1.42191 | 0.261472 | 3646713  |
| C2_10140W_A | -1.42253 | 0.456009 | 3643934  |
| FCY23       | -1.42267 | 0.241733 | 3647681  |
| C4_02960W_A | -1.42302 | 0.150904 | 3637873  |
| GPM2        | -1.4249  | 0.149482 | 3644713  |
| C1_00200C_A | -1.42513 | 0.427515 | 3639336  |
| MRPL33      | -1.4255  | 0.423747 | 30515175 |
| C1_09350W_A | -1.42559 | 0.244058 | 3634805  |
| MRPS9       | -1.42671 | 0.193408 | 3642064  |
| SKN2        | -1.42708 | 0.230507 | 3638309  |
| C6_02900C_A | -1.42716 | 0.393736 | 3639240  |
| CR_10630W_A | -1.42723 | 0.439479 | 3639007  |
| ECM7        | -1.42732 | 0.229395 | 3645029  |
| NSA1        | -1.4299  | 0.26133  | 3642313  |
| C2_07000W_A | -1.43039 | 0.228393 | 3643534  |
| C3_04350C_A | -1.4319  | 0.729612 | 3635275  |
| AFG1        | -1.43201 | 0.279266 | 3634920  |
| UTP21       | -1.43206 | 0.281186 | 3635757  |
| PMA1        | -1.43217 | 0.145791 | 3640531  |
| FGR44       | -1.43285 | 0.203237 | 3635166  |
| C5_03850W_A | -1.4332  | 0.270882 | 3647225  |
| PTR22       | -1.43333 | 0.188514 | 3645634  |
| C4_01800W_A | -1.43389 | 0.728266 | 3635595  |
| CR_02780W_A | -1.43389 | 0.728439 | 3642582  |
| C1_07810C_A | -1.43426 | 0.292788 | 3640708  |
| C7_02350C_A | -1.43455 | 0.226795 | 3636932  |
| CR_01720W_A | -1.43504 | 0.217498 | 3640114  |
| C2_07770C_A | -1.43506 | 0.718928 | 30515144 |

|             |          |          |          |
|-------------|----------|----------|----------|
| CR_04990C_A | -1.43515 | 0.719028 | 3646391  |
| C5_00760W_A | -1.43527 | 0.186002 | 3644122  |
| C4_06420W_A | -1.43606 | 0.180974 | 3642795  |
| C6_03260W_A | -1.4364  | 0.27702  | 3639183  |
| TERT        | -1.43666 | 0.282586 | 3640729  |
| SPT7        | -1.43847 | 0.174628 | 3638928  |
| OLE1        | -1.43909 | 0.18685  | 3640755  |
| BCR1        | -1.44072 | 0.185857 | 3645280  |
| CR_06450W_A | -1.44127 | 0.306176 | 3645279  |
| C7_03240W_A | -1.44727 | 0.087874 | 3641368  |
| UBA4        | -1.44779 | 0.185381 | 3644432  |
| PEX12       | -1.44947 | 0.212967 | 3638862  |
| PAM17       | -1.45104 | 0.193293 | 3638369  |
| C3_01230C_A | -1.45187 | 0.576132 | 3636609  |
| C6_01330C_A | -1.45187 | 0.57603  | 3641643  |
| C1_11530C_A | -1.45187 | 0.57618  | 3645334  |
| C5_04630W_A | -1.45215 | 0.396113 | 3636395  |
| KIN3        | -1.4525  | 0.123464 | 3641199  |
| C1_00030C_A | -1.45313 | 0.312766 | 3639373  |
| C7_02860C_A | -1.45432 | 0.165861 | 3641397  |
| CKB2        | -1.45491 | 0.226577 | 3637741  |
| C3_05540C_A | -1.45621 | 0.52424  | 3643658  |
| PDC12       | -1.45799 | 0.436753 | 3635591  |
| C7_03580C_A | -1.45834 | 0.234683 | 3646238  |
| NRG1        | -1.45882 | 0.116154 | 3643166  |
| TOM7        | -1.45926 | 0.409032 | 30515355 |
| C2_08020C_A | -1.45958 | 0.162564 | 3642308  |
| C5_05250C_A | -1.4604  | 0.212788 | 3636472  |
| RGT1        | -1.46236 | 0.192667 | 3637920  |
| CR_03640C_A | -1.46241 | 0.162816 | 3643190  |
| UTR2        | -1.46257 | 0.197349 | 3636591  |
| C1_05280W_A | -1.46361 | 0.29612  | 3642475  |
| CSC25       | -1.46483 | 0.161573 | 3645660  |
| SWR1        | -1.46523 | 0.118962 | 3645220  |
| CR_03620C_A | -1.46601 | 0.094921 | 3643182  |
| HAP3        | -1.4661  | 0.594064 | 3635629  |
| FET31       | -1.46821 | 0.15056  | 3647151  |
| C1_10330C_A | -1.46824 | 0.280637 | 3634908  |
| TOM1        | -1.46847 | 0.100655 | 3642987  |
| TOP1        | -1.46898 | 0.17753  | 3644034  |
| C2_08960C_A | -1.46904 | 0.270503 | 3645787  |
| C7_04150W_A | -1.46958 | 0.184946 | 3643128  |
| C3_06140W_A | -1.47052 | 0.372383 | 3641764  |
| C2_03260W_A | -1.47162 | 0.195492 | 3637432  |
| CR_03180W_A | -1.47358 | 0.155523 | 3645133  |
| C1_14410W_A | -1.47798 | 0.198191 | 3643293  |
| C5_03440W_A | -1.47808 | 0.197512 | 30515310 |

|             |          |          |          |
|-------------|----------|----------|----------|
| C4_07130W_A | -1.4784  | 0.138169 | 3642938  |
| ROM2        | -1.47884 | 0.108527 | 3637434  |
| C7_00270W_A | -1.47892 | 0.176949 | 3637977  |
| CR_10770W_A | -1.47969 | 0.192978 | 3638944  |
| C4_00080C_A | -1.48181 | 0.179722 | 3648065  |
| C6_02690C_A | -1.48209 | 0.196236 | 3639228  |
| TIM17       | -1.48215 | 0.208741 | 3647790  |
| C1_11610C_A | -1.48405 | 0.143757 | 3645345  |
| CR_08940W_A | -1.48463 | 0.192993 | 3641914  |
| TIM23       | -1.48498 | 0.195609 | 3643777  |
| C2_01740C_A | -1.48502 | 0.328225 | 3635733  |
| C7_01590C_A | -1.48512 | 0.329463 | 3637037  |
| C5_01530C_A | -1.48684 | 0.182502 | 3647062  |
| C6_02110W_A | -1.48806 | 0.3559   | 3647553  |
| C6_01940W_A | -1.49244 | 0.51682  | 30515337 |
| C2_03560C_A | -1.49364 | 0.207898 | 3637337  |
| SEO1        | -1.49391 | 0.387679 | 3646621  |
| C1_07570C_A | -1.49464 | 0.376204 | 3646675  |
| WSC2        | -1.49465 | 0.053701 | 3639225  |
| C5_02310C_A | -1.495   | 0.344417 | 3637787  |
| SDA1        | -1.49506 | 0.081541 | 3646688  |
| SMI1        | -1.49507 | 0.117668 | 3640741  |
| OFD1        | -1.49646 | 0.139903 | 3646962  |
| TFG1        | -1.49662 | 0.053981 | 3635645  |
| SPB1        | -1.4973  | 0.168709 | 3648179  |
| C3_00380C_A | -1.49868 | 0.211317 | 3640540  |
| C6_03910C_A | -1.49868 | 0.213174 | 3640263  |
| CR_06010W_A | -1.49892 | 0.2531   | 3644870  |
| DCK1        | -1.49932 | 0.077376 | 3637383  |
| C7_03400C_A | -1.49975 | 0.15161  | 3646717  |
| C4_06840W_A | -1.50056 | 0.336557 | 3642913  |
| UBC8        | -1.50064 | 0.091044 | 3645433  |
| C2_05910W_A | -1.50084 | 0.225227 | 3647476  |
| TGL99       | -1.50304 | 0.161784 | 3636168  |
| C3_00390W_A | -1.50325 | 0.409241 | 3640539  |
| CR_04580W_A | -1.50848 | 0.136348 | 3640948  |
| C4_06680C_A | -1.50909 | 0.116056 | 3642950  |
| CR_10310W_A | -1.50926 | 0.626639 | 3638937  |
| CCH1        | -1.50984 | 0.124638 | 3640175  |
| TPO2        | -1.51001 | 0.505311 | 3643164  |
| C7_00840C_A | -1.51029 | 0.319192 | 3638057  |
| C3_02990C_A | -1.51052 | 0.30673  | 3638388  |
| CDR2        | -1.51292 | 0.180943 | 3635265  |
| CR_06470W_A | -1.51353 | 0.08447  | 3645277  |
| CR_09410W_A | -1.51388 | 0.174833 | 3641933  |
| MRP20       | -1.5145  | 0.179256 | 3640224  |
| RRP42       | -1.51635 | 0.251085 | 3647852  |

|             |          |          |          |
|-------------|----------|----------|----------|
| ILS1        | -1.51681 | 0.088678 | 3645956  |
| CR_01130W_A | -1.51737 | 0.117173 | 3640433  |
| CDH1        | -1.51748 | 0.141363 | 3638814  |
| C6_03740W_A | -1.51811 | 0.59935  | 3640304  |
| C2_08060W_A | -1.51893 | 0.482469 | 30515151 |
| C1_05400C_A | -1.51902 | 0.390736 | 3642478  |
| SPR28       | -1.51919 | 0.372305 | 3637716  |
| CR_00670C_A | -1.51921 | 0.233057 | 3639655  |
| C2_07410W_A | -1.51962 | 0.161933 | 3645203  |
| C1_11200W_A | -1.52082 | 0.164881 | 3644396  |
| C1_11300C_A | -1.52133 | 0.159236 | 3644552  |
| C6_03430C_A | -1.52158 | 0.106175 | 3640273  |
| C7_01170C_A | -1.52319 | 0.132673 | 3645914  |
| ENA2        | -1.52451 | 0.110664 | 3639291  |
| EXO70       | -1.52471 | 0.089839 | 3636948  |
| IMP4        | -1.52794 | 0.093478 | 3644138  |
| HRK1        | -1.53047 | 0.077296 | 3640586  |
| C5_02010C_A | -1.53092 | 0.12393  | 3643772  |
| SOG2        | -1.53099 | 0.081096 | 3644475  |
| RMT2        | -1.53105 | 0.178992 | 3641569  |
| C7_02460C_A | -1.5311  | 0.071936 | 3636946  |
| PBS2        | -1.53148 | 0.079621 | 3641748  |
| C4_04930C_A | -1.53192 | 0.348199 | 3641170  |
| SPT6        | -1.53258 | 0.089324 | 3643171  |
| C3_01190C_A | -1.53303 | 0.110494 | 3647961  |
| PGA62       | -1.53329 | 0.125329 | 3637879  |
| CR_07660C_A | -1.53676 | 0.11667  | 3647256  |
| C3_01660W_A | -1.5369  | 0.216882 | 3636607  |
| CR_08500W_A | -1.53698 | 0.086452 | 3642136  |
| RPR2        | -1.53772 | 0.413811 | 3641017  |
| C1_11150W_A | -1.53819 | 0.241589 | 3648356  |
| CR_04310C_A | -1.53876 | 0.199268 | 3640996  |
| C1_13330C_A | -1.53899 | 0.094179 | 3636150  |
| C1_01750W_A | -1.5413  | 0.350338 | 3645413  |
| C2_03420C_A | -1.54259 | 0.116861 | 3637411  |
| CR_08290W_A | -1.54325 | 0.085745 | 3642103  |
| C3_00530C_A | -1.54333 | 0.218313 | 3640588  |
| C1_02470W_A | -1.5439  | 0.402321 | 3636851  |
| C6_00490W_A | -1.54393 | 0.322929 | 3647150  |
| REP1        | -1.54525 | 0.198466 | 3639708  |
| CHO2        | -1.54627 | 0.178417 | 3647690  |
| HCR1        | -1.5468  | 0.126638 | 3638952  |
| C1_01820C_A | -1.54742 | 0.140633 | 3645435  |
| C2_01750C_A | -1.54774 | 0.205297 | 3635734  |
| CR_06320C_A | -1.54976 | 0.130713 | 3644845  |
| C5_03110C_A | -1.55145 | 0.379361 | 30515306 |
| CKB1        | -1.55335 | 0.109231 | 3638799  |

|             |          |          |          |
|-------------|----------|----------|----------|
| C7_04170W_A | -1.55432 | 0.506349 | 3643126  |
| CR_00980C_A | -1.55525 | 0.057306 | 3640426  |
| C4_03200C_A | -1.55594 | 0.111372 | 3637837  |
| CR_06680C_A | -1.55628 | 0.134244 | 3646623  |
| C5_03700C_A | -1.55766 | 0.187417 | 3646990  |
| C5_04320C_A | -1.55781 | 0.05913  | 3636480  |
| GLN3        | -1.55881 | 0.094763 | 3636453  |
| C3_02260C_A | -1.55886 | 0.117553 | 3636636  |
| C5_05210W_A | -1.56011 | 0.135816 | 3636468  |
| C5_03640W_A | -1.56029 | 0.138929 | 3646984  |
| C2_03410W_A | -1.56045 | 0.051572 | 3637412  |
| SFU1        | -1.56165 | 0.117766 | 3634867  |
| ARL1        | -1.56362 | 0.126498 | 3635637  |
| AFT2        | -1.56402 | 0.128334 | 3643511  |
| ECM3        | -1.56437 | 0.123202 | 3635754  |
| DUG3        | -1.56479 | 0.134025 | 3641381  |
| C1_10910C_A | -1.56634 | 0.126581 | 3644445  |
| BMS1        | -1.5664  | 0.065815 | 3639857  |
| C7_01400C_A | -1.56663 | 0.124279 | 3645893  |
| C2_03880C_A | -1.56725 | 0.512467 | 30515108 |
| PET100      | -1.56916 | 0.189205 | 30515038 |
| CR_06230W_A | -1.57064 | 0.239549 | 3644867  |
| IFF4        | -1.57217 | 0.188538 | 3639694  |
| SRB8        | -1.57355 | 0.082652 | 3641128  |
| RHD3        | -1.5737  | 0.057666 | 3641212  |
| HGT16       | -1.57447 | 0.456075 | 3646026  |
| PBP2        | -1.57669 | 0.047072 | 3640267  |
| PTH1        | -1.5773  | 0.096213 | 3637710  |
| C2_10740C_A | -1.57855 | 0.117291 | 3641236  |
| BPH1        | -1.57889 | 0.076371 | 3639547  |
| SLU7        | -1.57935 | 0.172129 | 3638501  |
| CR_01640C_A | -1.57976 | 0.473869 | 3640086  |
| IPT1        | -1.58004 | 0.074258 | 3634941  |
| OPT8        | -1.581   | 0.109419 | 3640266  |
| AFG3        | -1.58257 | 0.082593 | 3636589  |
| ABD1        | -1.5826  | 0.085862 | 3638456  |
| C4_00070C_A | -1.58316 | 0.042474 | 3648063  |
| C1_07960W_A | -1.58475 | 0.275439 | 3640725  |
| C1_01590C_A | -1.58485 | 0.047259 | 3640223  |
| SEC2        | -1.58548 | 0.037203 | 3636119  |
| DAO2        | -1.58552 | 0.193226 | 3646797  |
| CR_06530W_A | -1.58742 | 0.21289  | 3645262  |
| C5_01300C_A | -1.58746 | 0.421897 | 3642646  |
| C4_06960W_A | -1.58757 | 0.420506 | 3642926  |
| C2_07510W_A | -1.58865 | 0.270502 | 3645208  |
| CR_01630C_A | -1.58881 | 0.276099 | 3640085  |
| C3_02030W_A | -1.58926 | 0.114891 | 3636580  |

|             |          |          |         |
|-------------|----------|----------|---------|
| C2_10680W_A | -1.58937 | 0.072525 | 3641252 |
| C2_03460C_A | -1.59028 | 0.088865 | 3637348 |
| PHO84       | -1.5914  | 0.140859 | 3645348 |
| BRO1        | -1.59266 | 0.061204 | 3636590 |
| FRP3        | -1.59372 | 0.166467 | 3648102 |
| C2_05300C_A | -1.59467 | 0.121302 | 3643423 |
| MDR1        | -1.59692 | 0.401067 | 3639260 |
| C2_02440W_A | -1.59839 | 0.088947 | 3635758 |
| ZCF38       | -1.6031  | 0.107526 | 3639705 |
| RIX7        | -1.60468 | 0.102823 | 3637735 |
| C7_00300W_A | -1.60551 | 0.063465 | 3638046 |
| C1_06800W_A | -1.60566 | 0.112341 | 3639496 |
| C3_04750W_A | -1.60659 | 0.180318 | 3635252 |
| C3_03110W_A | -1.6068  | 0.172046 | 3638400 |
| CPR6        | -1.60706 | 0.046333 | 3639020 |
| C6_01980C_A | -1.60708 | 0.081175 | 3644560 |
| PRP39       | -1.6079  | 0.290107 | 3635832 |
| C1_05120W_A | -1.60799 | 0.076726 | 3647667 |
| BRF1        | -1.60935 | 0.058812 | 3646689 |
| ACH1        | -1.61021 | 0.045612 | 3643773 |
| C6_00640C_A | -1.61054 | 0.099492 | 3647134 |
| C1_01680C_A | -1.61066 | 0.17588  | 3640198 |
| C2_02730W_A | -1.61212 | 0.101787 | 3643035 |
| C3_00130C_A | -1.61215 | 0.06489  | 3640593 |
| GLE1        | -1.61222 | 0.097621 | 3642340 |
| DBP8        | -1.61248 | 0.098583 | 3646692 |
| SIS1        | -1.61299 | 0.055432 | 3644841 |
| ADH5        | -1.61384 | 0.116739 | 3640156 |
| SUI1        | -1.61429 | 0.088653 | 3647730 |
| UBR1        | -1.61686 | 0.063839 | 3637871 |
| C3_05060W_A | -1.61737 | 0.277576 | 3635241 |
| CR_00370W_A | -1.61742 | 0.082403 | 3639684 |
| CFL1        | -1.62235 | 0.248906 | 3641810 |
| MLS1        | -1.62393 | 0.114779 | 3634875 |
| NOP14       | -1.62575 | 0.099975 | 3635266 |
| C6_03220W_A | -1.62689 | 0.172163 | 3639179 |
| UTP4        | -1.62727 | 0.078408 | 3636657 |
| C2_00170C_A | -1.62925 | 0.064947 | 3638906 |
| MUP1        | -1.62928 | 0.052048 | 3642008 |
| C2_04570W_A | -1.63156 | 0.129979 | 3645441 |
| C2_09360W_A | -1.6318  | 0.152068 | 3644109 |
| C5_00350C_A | -1.63195 | 0.091405 | 3641554 |
| CR_09340W_A | -1.63236 | 0.056573 | 3641900 |
| BDF1        | -1.63354 | 0.021745 | 3641592 |
| SSD1        | -1.63491 | 0.02993  | 3636520 |
| SEH1        | -1.63524 | 0.051656 | 3642290 |
| DIP5        | -1.63566 | 0.063004 | 3636798 |

|             |          |          |          |
|-------------|----------|----------|----------|
| C2_09680W_A | -1.63637 | 0.093289 | 3643791  |
| SNF2        | -1.63714 | 0.085368 | 3635855  |
| C2_00230W_A | -1.63737 | 0.087475 | 3638901  |
| DRS1        | -1.63795 | 0.082081 | 3639045  |
| MDN1        | -1.63965 | 0.037372 | 3635614  |
| PFK1        | -1.63968 | 0.0742   | 3636448  |
| C6_02930W_A | -1.64605 | 0.034271 | 3639243  |
| PTP1        | -1.64654 | 0.056357 | 3642093  |
| C5_03300C_A | -1.64761 | 0.101857 | 3646357  |
| C1_01460W_A | -1.64767 | 0.047985 | 3640240  |
| CR_03410W_A | -1.64817 | 0.091098 | 3645136  |
| MTO1        | -1.64832 | 0.325225 | 3640707  |
| ECM42       | -1.64854 | 0.13949  | 3636995  |
| C3_02020W_A | -1.64855 | 0.046023 | 3636592  |
| C3_01150C_A | -1.64942 | 0.097693 | 3648401  |
| C3_05950W_A | -1.64981 | 0.222616 | 3641728  |
| C5_05130C_A | -1.65125 | 0.227828 | 3636459  |
| VPS13       | -1.6522  | 0.027208 | 3646528  |
| XYL2        | -1.65232 | 0.086223 | 3638961  |
| C1_05420W_A | -1.65431 | 0.209865 | 3642493  |
| MCU1        | -1.65448 | 0.248015 | 3636169  |
| C1_08910C_A | -1.65543 | 0.276041 | 3634926  |
| C1_05540C_A | -1.65582 | 0.058604 | 3642503  |
| CR_07760W_A | -1.65655 | 0.278635 | 30515431 |
| C6_04480C_A | -1.65795 | 0.05401  | 3645986  |
| C7_01360C_A | -1.65821 | 0.306479 | 3645900  |
| HLJ1        | -1.65928 | 0.091341 | 3643158  |
| GCN1        | -1.65973 | 0.06282  | 3641256  |
| IPK2        | -1.65993 | 0.085028 | 3643784  |
| IHD1        | -1.66071 | 0.111137 | 3640291  |
| C5_03030W_A | -1.66151 | 0.126602 | 3637822  |
| C1_06030C_A | -1.6625  | 0.377787 | 3639867  |
| C2_01820C_A | -1.66327 | 0.115506 | 3635831  |
| UGA1        | -1.66447 | 0.133371 | 3637329  |
| ALS9        | -1.66509 | 0.086884 | 3640281  |
| FBP1        | -1.66616 | 0.100481 | 3647464  |
| CR_10180W_A | -1.66624 | 0.400041 | 3638917  |
| SGE1        | -1.66835 | 0.118833 | 3642614  |
| PPT1        | -1.66877 | 0.120871 | 3636602  |
| CR_03730C_A | -1.67045 | 0.05114  | 3643226  |
| C3_04840C_A | -1.67077 | 0.125198 | 3635224  |
| SOD3        | -1.67095 | 0.132887 | 30515347 |
| C1_13950C_A | -1.67255 | 0.442522 | 3636186  |
| C5_04910W_A | -1.67357 | 0.242061 | 3636417  |
| C2_09510C_A | -1.67667 | 0.023577 | 3643816  |
| C7_03730C_A | -1.6769  | 0.076215 | 3647867  |
| CR_02270C_A | -1.67941 | 0.21006  | 3644911  |

|             |          |          |          |
|-------------|----------|----------|----------|
| C3_01560W_A | -1.68072 | 0.045525 | 3636669  |
| CHT1        | -1.68152 | 0.206895 | 3639704  |
| CR_05190W_A | -1.68304 | 0.640555 | 3648079  |
| MTR10       | -1.68387 | 0.061169 | 3647235  |
| NAG4        | -1.684   | 0.511684 | 3645978  |
| FRP5        | -1.68411 | 0.517995 | 3641600  |
| FLU1        | -1.68436 | 0.08949  | 3637048  |
| IAH1        | -1.68468 | 0.071251 | 3638945  |
| C2_04120C_A | -1.68534 | 0.041358 | 3637377  |
| CR_09480W_A | -1.68591 | 0.065064 | 3641939  |
| C1_07640C_A | -1.68626 | 0.205783 | 3646659  |
| TSR1        | -1.68684 | 0.044765 | 3642135  |
| C3_03740W_A | -1.68738 | 0.221609 | 3645640  |
| FCA1        | -1.68814 | 0.070133 | 30515327 |
| GRX3        | -1.68862 | 0.03609  | 3637858  |
| C7_01510W_A | -1.69028 | 0.034644 | 3637049  |
| PSD1        | -1.69035 | 0.031418 | 3639382  |
| C2_00700W_A | -1.69215 | 0.055867 | 3638884  |
| BBC1        | -1.69222 | 0.034441 | 3646661  |
| C5_01490C_A | -1.69384 | 0.031896 | 3647058  |
| C3_00010C_A | -1.69441 | 0.119316 | 3640600  |
| C6_02150C_A | -1.69637 | 0.149964 | 3645888  |
| C1_06410W_A | -1.69709 | 0.15092  | 3639555  |
| C1_00380C_A | -1.69752 | 0.054875 | 3639292  |
| C5_05360C_A | -1.69765 | 0.035581 | 3636402  |
| RPL38       | -1.69807 | 0.026837 | 30515082 |
| RSP5        | -1.69981 | 0.019781 | 3643898  |
| C4_01280C_A | -1.70125 | 0.061574 | 3635700  |
| C4_01710C_A | -1.70146 | 0.024444 | 3635708  |
| C1_04120C_A | -1.70318 | 0.188243 | 3644701  |
| C7_00160C_A | -1.70346 | 0.044959 | 3637972  |
| RPF2        | -1.70388 | 0.059403 | 3643467  |
| C5_00820W_A | -1.70396 | 0.089235 | 3644128  |
| UBI4        | -1.70396 | 0.05756  | 3638432  |
| C1_06650W_A | -1.70458 | 0.086667 | 3639543  |
| RRP8        | -1.70647 | 0.059745 | 3643900  |
| STI1        | -1.70717 | 0.01069  | 3643758  |
| CR_04370W_A | -1.70732 | 0.122051 | 3641004  |
| NHP2        | -1.70783 | 0.038078 | 3641003  |
| C4_03410W_A | -1.70816 | 0.066284 | 3646807  |
| HOL1        | -1.70817 | 0.260387 | 3636838  |
| C1_06540C_A | -1.71162 | 0.061366 | 3639520  |
| C2_09670C_A | -1.71217 | 0.040075 | 3643792  |
| PET127      | -1.71333 | 0.148956 | 3644417  |
| C3_00990C_A | -1.71338 | 0.59236  | 3639856  |
| C3_02660W_A | -1.71338 | 0.592118 | 3638404  |
| C3_04190W_A | -1.71338 | 0.59188  | 30515203 |



|             |          |          |          |
|-------------|----------|----------|----------|
| C4_05040W_A | -1.71339 | 0.59273  | 30515275 |
| C4_03370C_A | -1.71652 | 0.214375 | 3646796  |
| FPG1        | -1.71685 | 0.037857 | 3641632  |
| C2_01680C_A | -1.71735 | 0.032685 | 3635744  |
| CR_02960W_A | -1.72314 | 0.182256 | 3642591  |
| MED15       | -1.72483 | 0.028546 | 3640761  |
| CR_00090C_A | -1.72592 | 0.078451 | 3639734  |
| C3_03470W_A | -1.72879 | 0.313088 | 3638306  |
| VPS24       | -1.72948 | 0.04582  | 3638892  |
| HTS1        | -1.73017 | 0.01445  | 3636532  |
| SAP10       | -1.73039 | 0.045812 | 3641126  |
| RAX1        | -1.73218 | 0.03878  | 3635256  |
| C4_05330C_A | -1.73235 | 0.151229 | 3646959  |
| C2_06780C_A | -1.7351  | 0.109889 | 3643516  |
| C1_00100C_A | -1.73564 | 0.085288 | 3639325  |
| C1_03310W_A | -1.73594 | 0.056961 | 3636856  |
| MTG1        | -1.73615 | 0.171444 | 3645139  |
| CR_02890C_A | -1.73716 | 0.066034 | 3642585  |
| CR_05550C_A | -1.73746 | 0.034367 | 3647593  |
| UTP5        | -1.73776 | 0.038553 | 3638922  |
| SPB4        | -1.73926 | 0.081549 | 3647252  |
| C1_03270W_A | -1.74067 | 0.055771 | 3636900  |
| MSW1        | -1.74087 | 0.102561 | 3637743  |
| C2_00220C_A | -1.74088 | 0.031441 | 3638902  |
| C3_04700W_A | -1.7416  | 0.101347 | 3635247  |
| C2_00600C_A | -1.74324 | 0.020516 | 3638850  |
| GDT1        | -1.74337 | 0.054049 | 3645445  |
| RIM15       | -1.74396 | 0.041339 | 3637961  |
| C2_05820W_A | -1.74409 | 0.032765 | 3647482  |
| CNT         | -1.74497 | 0.011824 | 3644071  |
| C7_03230C_A | -1.74519 | 0.34026  | 3641369  |
| NAG3        | -1.74554 | 0.125744 | 3645969  |
| CR_09580C_A | -1.74621 | 0.054271 | 3647097  |
| C2_10070W_A | -1.74764 | 0.615469 | 3643946  |
| C5_03520W_A | -1.74764 | 0.614871 | 3646970  |
| C1_04370C_A | -1.74797 | 0.034294 | 3647994  |
| PEA2        | -1.74882 | 0.12176  | 3647673  |
| CCW14       | -1.75153 | 0.169551 | 3642650  |
| C3_07390C_A | -1.75421 | 0.063324 | 3638472  |
| GCD7        | -1.75446 | 0.040575 | 3637367  |
| C1_03050W_A | -1.755   | 0.023262 | 3636843  |
| RIM9        | -1.75519 | 0.100721 | 3644047  |
| MAS1        | -1.75619 | 0.051044 | 3636855  |
| C2_05550W_A | -1.75658 | 0.125163 | 3645560  |
| MUB1        | -1.75689 | 0.026029 | 3642246  |
| PPG1        | -1.75887 | 0.085164 | 3641143  |
| C2_02520W_A | -1.759   | 0.058258 | 3635818  |

|             |          |          |         |
|-------------|----------|----------|---------|
| C3_04330C_A | -1.75918 | 0.073444 | 3635272 |
| PRN3        | -1.76056 | 0.176555 | 3639878 |
| YCF1        | -1.76171 | 0.025153 | 3636934 |
| NIK1        | -1.76192 | 0.036414 | 3641358 |
| C2_07720C_A | -1.76224 | 0.099753 | 3642304 |
| C1_06910C_A | -1.76424 | 0.023815 | 3639526 |
| CR_03110W_A | -1.76508 | 0.107032 | 3645124 |
| C1_13560W_A | -1.76513 | 0.085265 | 3636174 |
| TFB3        | -1.76572 | 0.076735 | 3644115 |
| C2_01370C_A | -1.76613 | 0.0604   | 3635723 |
| C3_05160C_A | -1.76637 | 0.031075 | 3635229 |
| BEM1        | -1.76806 | 0.035489 | 3635627 |
| C7_01570C_A | -1.76949 | 0.339915 | 3637040 |
| C7_01720W_A | -1.76998 | 0.034402 | 3637011 |
| C2_00940W_A | -1.77061 | 0.046854 | 3638891 |
| C4_07060W_A | -1.77072 | 0.018944 | 3642908 |
| STE4        | -1.77222 | 0.142663 | 3637358 |
| CAN2        | -1.77433 | 0.050704 | 3644017 |
| C5_00030W_A | -1.77449 | 0.051605 | 3647879 |
| HST7        | -1.77475 | 0.024867 | 3640953 |
| C5_00800C_A | -1.77526 | 0.015593 | 3644126 |
| CR_07140C_A | -1.77609 | 0.067688 | 3648227 |
| C5_01430C_A | -1.77898 | 0.059223 | 3647056 |
| CCT8        | -1.77927 | 0.01479  | 3639324 |
| IFF3        | -1.78113 | 0.013634 | 3643189 |
| C1_11770C_A | -1.78139 | 0.014153 | 3645327 |
| C1_14550C_A | -1.78466 | 0.204995 | 3643334 |
| C2_10850C_A | -1.7854  | 0.01672  | 3641232 |
| C4_00030C_A | -1.78642 | 0.042579 | 3648055 |
| C3_03440C_A | -1.78724 | 0.17415  | 3638356 |
| PRN1        | -1.78791 | 0.089739 | 3639882 |
| C1_10840C_A | -1.78809 | 0.024523 | 3644452 |
| CYS3        | -1.79112 | 0.030534 | 3642081 |
| C2_09420W_A | -1.79213 | 0.095175 | 3647718 |
| URA7        | -1.79289 | 0.024657 | 3636510 |
| C2_05770W_A | -1.79393 | 0.049474 | 3645579 |
| C1_04960C_A | -1.79464 | 0.049371 | 3647527 |
| C2_07640W_A | -1.7954  | 0.016807 | 3645192 |
| CR_08200C_A | -1.79633 | 0.023724 | 3642087 |
| MBF1        | -1.7969  | 0.025521 | 3640171 |
| SYG1        | -1.79692 | 0.074561 | 3644777 |
| C2_04750W_A | -1.79734 | 0.092116 | 3647785 |
| CYR1        | -1.79748 | 0.029655 | 3641407 |
| MST1        | -1.79777 | 0.08279  | 3636831 |
| HEM1        | -1.79872 | 0.025517 | 3640149 |
| C6_01380C_A | -1.79914 | 0.145    | 3641606 |
| SNP3        | -1.80088 | 0.199949 | 3640991 |

|             |          |          |          |
|-------------|----------|----------|----------|
| C3_06290W_A | -1.80237 | 0.021554 | 3642237  |
| C5_03560W_A | -1.80598 | 0.046841 | 3646975  |
| POL93       | -1.80713 | 0.031059 | 3639299  |
| C5_05000C_A | -1.80789 | 0.065408 | 3636539  |
| C3_07680W_A | -1.80865 | 0.011246 | 3638459  |
| C7_03760W_A | -1.80891 | 0.079611 | 3647865  |
| YFH1        | -1.80901 | 0.080348 | 3646853  |
| C1_10420C_A | -1.80969 | 0.040125 | 3647178  |
| C1_05220C_A | -1.80988 | 0.402602 | 3642464  |
| C4_02680C_A | -1.80989 | 0.398081 | 3637828  |
| NOG1        | -1.81151 | 0.007086 | 3641736  |
| C2_09000C_A | -1.81434 | 0.167059 | 3645782  |
| EAf3        | -1.81448 | 0.137531 | 3648318  |
| C3_02350W_A | -1.81654 | 0.028558 | 3636618  |
| C7_03040W_A | -1.82131 | 0.201426 | 3641379  |
| FET3        | -1.82254 | 0.054321 | 3647153  |
| MTLA1       | -1.8242  | 0.157741 | 3643729  |
| C4_00680W_A | -1.82598 | 0.047871 | 3645753  |
| MAK21       | -1.82685 | 0.016481 | 3635147  |
| C4_03780C_A | -1.8279  | 0.064919 | 3645353  |
| C1_04360C_A | -1.83011 | 0.019251 | 30514985 |
| QDR1        | -1.83158 | 0.047813 | 3640941  |
| CR_02700W_A | -1.83431 | 0.275043 | 3642575  |
| C2_06160W_A | -1.83589 | 0.316027 | 3644079  |
| SKP1        | -1.83695 | 0.018317 | 3644485  |
| RCL1        | -1.83902 | 0.01776  | 3645199  |
| CWT1        | -1.83993 | 0.014408 | 3647595  |
| OPT1        | -1.8401  | 0.181693 | 3640150  |
| C5_03570W_A | -1.84034 | 0.049195 | 3646976  |
| C1_09950C_A | -1.84057 | 0.036245 | 3634861  |
| DCP2        | -1.84417 | 0.005219 | 3642069  |
| C1_04040C_A | -1.84591 | 0.020203 | 3646429  |
| C1_00570C_A | -1.8462  | 0.033108 | 3639362  |
| C6_04470C_A | -1.84687 | 0.014847 | 3645985  |
| C4_04990C_A | -1.84793 | 0.24177  | 3641166  |
| CR_10410C_A | -1.85233 | 0.014726 | 3638957  |
| SNX4        | -1.85259 | 0.019953 | 3638843  |
| C6_02350C_A | -1.85459 | 0.042139 | 3645881  |
| ZCF21       | -1.85472 | 0.023904 | 3645762  |
| ATO6        | -1.85528 | 0.130957 | 3643664  |
| CR_00220W_A | -1.85737 | 0.080773 | 3639699  |
| MBP1        | -1.85814 | 0.007715 | 3635281  |
| CR_10750C_A | -1.85916 | 0.030997 | 3638942  |
| C1_00540C_A | -1.85917 | 0.033026 | 3639367  |
| SLN1        | -1.8609  | 0.003624 | 3640422  |
| CR_09740W_A | -1.86226 | 0.046301 | 3639008  |
| KOG1        | -1.86311 | 0.022671 | 3642488  |

|             |          |          |         |
|-------------|----------|----------|---------|
| WOR4        | -1.86394 | 0.022681 | 3638454 |
| ELF1        | -1.86495 | 0.019445 | 3641903 |
| VAC7        | -1.86513 | 0.026719 | 3646849 |
| C2_10540W_A | -1.8653  | 0.030739 | 3641200 |
| RPB7        | -1.86856 | 0.074162 | 3640221 |
| C2_07680W_A | -1.86949 | 0.045686 | 3642339 |
| OYE2        | -1.86969 | 0.017537 | 3641603 |
| BLM3        | -1.87005 | 0.011157 | 3642310 |
| C1_06660W_A | -1.87037 | 0.010309 | 3639542 |
| GAP5        | -1.87118 | 0.016039 | 3646954 |
| ERG3        | -1.87195 | 0.034634 | 3644776 |
| CR_03930C_A | -1.87307 | 0.05774  | 3640957 |
| C5_02370C_A | -1.87313 | 0.051549 | 3637793 |
| C3_03770C_A | -1.87751 | 0.026995 | 3645636 |
| PGA18       | -1.88197 | 0.027236 | 3638394 |
| HNM3        | -1.88237 | 0.117906 | 3640093 |
| C2_00190C_A | -1.88243 | 0.007324 | 3638904 |
| C3_03310C_A | -1.88289 | 0.119322 | 3638363 |
| CR_10640W_A | -1.883   | 0.12061  | 3639014 |
| C5_04010C_A | -1.88623 | 0.298964 | 3647439 |
| PRP22       | -1.88665 | 0.014864 | 3636404 |
| C7_03890C_A | -1.88668 | 0.00811  | 3643108 |
| C1_12570C_A | -1.88709 | 0.015563 | 3647604 |
| C2_07740W_A | -1.88994 | 0.003184 | 3642302 |
| C3_06880W_A | -1.89031 | 0.44757  | 3638539 |
| C1_04800C_A | -1.89042 | 0.434492 | 3644789 |
| MIS12       | -1.89046 | 0.020108 | 3639669 |
| C2_06600W_A | -1.89065 | 0.009936 | 3646563 |
| CIC1        | -1.89237 | 0.050131 | 3644059 |
| UTP15       | -1.89396 | 0.035148 | 3643906 |
| NEP1        | -1.89663 | 0.057242 | 3644545 |
| C4_00660W_A | -1.89757 | 0.027497 | 3645755 |
| C7_03680W_A | -1.89775 | 0.127836 | 3646228 |
| C3_00450C_A | -1.89848 | 0.025183 | 3640548 |
| C5_03510C_A | -1.90543 | 0.034894 | 3646969 |
| C2_06200C_A | -1.90692 | 0.069498 | 3646908 |
| C1_09540W_A | -1.90716 | 0.03358  | 3634885 |
| C1_06980C_A | -1.90801 | 0.018045 | 3639565 |
| C2_00840W_A | -1.9095  | 0.083748 | 3638807 |
| MNN14       | -1.91356 | 0.009051 | 3643651 |
| C4_05230C_A | -1.91589 | 0.051954 | 3646156 |
| C2_06030W_A | -1.91674 | 0.02406  | 3644070 |
| DCK2        | -1.9179  | 0.028766 | 3637384 |
| ALR1        | -1.9184  | 0.032003 | 3636616 |
| C1_12580W_A | -1.9198  | 0.01084  | 3647603 |
| RAD57       | -1.92043 | 0.055908 | 3642333 |
| C7_02550C_A | -1.92243 | 0.027852 | 3637018 |

|             |          |          |          |
|-------------|----------|----------|----------|
| SRP54       | -1.92263 | 0.006669 | 3640377  |
| C2_04700C_A | -1.92481 | 0.138389 | 3647794  |
| C2_09870W_A | -1.92526 | 0.018885 | 3643780  |
| CLN3        | -1.92686 | 0.021783 | 3642624  |
| C5_02190C_A | -1.92881 | 0.045087 | 30515303 |
| MEF2        | -1.92947 | 0.022753 | 3639564  |
| C5_05460C_A | -1.93044 | 0.133736 | 3636527  |
| C3_00300W_A | -1.93129 | 0.012603 | 3640524  |
| C2_02800W_A | -1.93172 | 0.045022 | 30515096 |
| C3_06760W_A | -1.93529 | 0.033492 | 3638502  |
| C1_02950W_A | -1.93695 | 0.259311 | 3636833  |
| CET1        | -1.93815 | 0.006521 | 3640140  |
| CDC37       | -1.93821 | 0.01182  | 3639210  |
| NOC4        | -1.93906 | 0.022749 | 3645224  |
| TPK1        | -1.94058 | 0.016331 | 3634879  |
| GYP5        | -1.94078 | 0.012791 | 3641246  |
| DBP2        | -1.94155 | 0.007203 | 3647692  |
| SUV3        | -1.94227 | 0.057119 | 3645451  |
| C2_03690C_A | -1.94259 | 0.029259 | 3637376  |
| PGA4        | -1.9433  | 0.004739 | 3636406  |
| HBR1        | -1.94434 | 0.009425 | 3639295  |
| CR_06840W_A | -1.94479 | 0.010194 | 3647322  |
| C1_05450W_A | -1.94531 | 0.732498 | 3642490  |
| C2_06350C_A | -1.94531 | 0.732498 | 3646919  |
| C4_00640W_A | -1.94531 | 0.732498 | 3645767  |
| C4_05580C_A | -1.94531 | 0.732498 | 3641775  |
| OPT9        | -1.94531 | 0.732498 | 3640090  |
| PGA19       | -1.94531 | 0.732498 | 3638894  |
| C1_03470C_A | -1.94532 | 0.732496 | 3636912  |
| C1_05970W_A | -1.94532 | 0.732496 | 3639874  |
| C1_09700W_A | -1.94532 | 0.732496 | 3634876  |
| C1_10050W_A | -1.94532 | 0.732496 | 3634811  |
| C1_11390W_A | -1.94532 | 0.732496 | 3644544  |
| C2_00560W_A | -1.94532 | 0.732496 | 3638854  |
| C2_06980W_A | -1.94532 | 0.732496 | 3643530  |
| C4_02240C_A | -1.94532 | 0.732496 | 3635692  |
| C4_03500C_A | -1.94532 | 0.732496 | 3646801  |
| CR_02340W_A | -1.94532 | 0.732496 | 3644936  |
| DAL52       | -1.94532 | 0.732496 | 3643736  |
| GIT4        | -1.94532 | 0.732496 | 3642635  |
| KRE62       | -1.94532 | 0.732496 | 3641543  |
| MFA1        | -1.94532 | 0.732496 | 30515153 |
| MRV3        | -1.94532 | 0.732496 | 3636546  |
| OPT5        | -1.94532 | 0.732496 | 3640768  |
| PTR2        | -1.94532 | 0.732496 | 3640089  |
| SPR3        | -1.94532 | 0.732496 | 3635853  |
| C7_01660C_A | -1.94609 | 0.019749 | 3636983  |

|             |          |          |          |
|-------------|----------|----------|----------|
| SMX4        | -1.94641 | 0.132703 | 30515427 |
| C7_02450W_A | -1.94698 | 0.016924 | 3636972  |
| C4_02260C_A | -1.94704 | 0.04283  | 3635690  |
| GEF2        | -1.94707 | 0.034783 | 3644935  |
| CDC4        | -1.94867 | 0.003913 | 3640125  |
| C7_01280C_A | -1.95044 | 0.05019  | 3645909  |
| SDH4        | -1.95152 | 0.089734 | 3636497  |
| C4_03090W_A | -1.95342 | 0.019832 | 3637926  |
| VPH2        | -1.95479 | 0.082524 | 3642021  |
| C1_05250W_A | -1.95525 | 0.353952 | 3642462  |
| C6_02460C_A | -1.95585 | 0.023461 | 3639168  |
| NUP49       | -1.9567  | 0.005918 | 3636173  |
| ORM1        | -1.95741 | 0.003612 | 3640307  |
| EXM2        | -1.95837 | 0.020602 | 3642929  |
| C1_13430C_A | -1.96096 | 0.090325 | 3636223  |
| C5_04990W_A | -1.9613  | 0.105605 | 3636538  |
| C3_05400C_A | -1.96412 | 0.36587  | 3643681  |
| C4_04350W_A | -1.96432 | 0.016225 | 3646852  |
| SCO1        | -1.9652  | 0.009266 | 3641922  |
| RVS161      | -1.96659 | 0.003495 | 3638005  |
| DAL9        | -1.96805 | 0.070621 | 3645653  |
| C2_01310W_A | -1.96906 | 0.02339  | 3638788  |
| JIP5        | -1.97228 | 0.019321 | 3634922  |
| C4_04200C_A | -1.97244 | 0.331527 | 3641182  |
| CR_00600C_A | -1.97534 | 0.030224 | 3639660  |
| C4_04670C_A | -1.97823 | 0.022824 | 3641140  |
| RGD3        | -1.97836 | 0.003222 | 3648003  |
| RNR22       | -1.97887 | 0.001119 | 3645217  |
| C2_04280W_A | -1.98616 | 0.018534 | 3637326  |
| C4_07100C_A | -1.98769 | 0.005445 | 3642903  |
| C1_11110C_A | -1.98968 | 0.088572 | 3644413  |
| GRR1        | -1.99027 | 0.002613 | 3636392  |
| GSY1        | -1.99065 | 0.008764 | 3640435  |
| C1_02940C_A | -1.99109 | 0.022304 | 3636832  |
| C3_07800C_A | -1.99345 | 0.020298 | 3647461  |
| C7_03590C_A | -1.99744 | 0.024003 | 3646239  |
| PEL1        | -1.99773 | 0.009494 | 3637989  |
| HMS1        | -1.99926 | 0.00513  | 3641570  |
| C4_02920W_A | -2.00009 | 0.004372 | 3637878  |
| SAM35       | -2.00146 | 0.018871 | 3643329  |
| SDH1        | -2.0018  | 0.011435 | 3642477  |
| CTR1        | -2.00518 | 0.044472 | 3647077  |
| RIO2        | -2.00792 | 0.014106 | 3642066  |
| SAP2        | -2.0082  | 0.029739 | 3647354  |
| GAL1        | -2.01729 | 0.000534 | 3644581  |
| AMS1        | -2.01752 | 0.013549 | 3637882  |
| CR_07030C_A | -2.01967 | 0.040029 | 3645730  |

|             |          |          |          |
|-------------|----------|----------|----------|
| C3_07430W_A | -2.02076 | 0.001877 | 3638484  |
| RIB1        | -2.02192 | 0.004368 | 3642607  |
| C3_03920W_A | -2.02479 | 0.033851 | 30515197 |
| C1_06070W_A | -2.02561 | 0.010271 | 3639824  |
| CR_07320C_A | -2.02562 | 0.015208 | 3646057  |
| HEX3        | -2.02942 | 0.008881 | 3635776  |
| MTR2        | -2.03087 | 0.011689 | 30515167 |
| CR_07750C_A | -2.03196 | 0.020508 | 3647350  |
| UTP8        | -2.03306 | 0.003562 | 3640547  |
| MOB2        | -2.03373 | 0.021518 | 3639381  |
| CR_03120W_A | -2.03423 | 0.005183 | 3645123  |
| CR_00160C_A | -2.03548 | 0.015421 | 3639706  |
| C4_02850W_A | -2.0362  | 0.008881 | 3637910  |
| C3_07290W_A | -2.03682 | 0.008322 | 3638430  |
| RRP9        | -2.03701 | 0.041742 | 3642576  |
| CTN3        | -2.0448  | 0.024313 | 3647396  |
| GIR2        | -2.04551 | 0.009709 | 3636962  |
| C3_03670W_A | -2.05078 | 0.004268 | 3645649  |
| C4_06990W_A | -2.05111 | 0.018688 | 3642968  |
| MTG2        | -2.05458 | 0.017971 | 3646693  |
| C2_04820W_A | -2.0551  | 0.015103 | 3647776  |
| CR_03200C_A | -2.05778 | 0.009494 | 3645131  |
| CR_05440W_A | -2.05881 | 0.011931 | 3648245  |
| PNG2        | -2.05951 | 0.00786  | 3645568  |
| CR_03740C_A | -2.06006 | 0.027627 | 3643176  |
| MLP1        | -2.06073 | 0.003988 | 3635688  |
| C1_12610W_A | -2.06177 | 0.012744 | 3646825  |
| CR_02670C_A | -2.06208 | 0.010601 | 3642572  |
| HAL9        | -2.06481 | 0.003218 | 3643757  |
| RPM2        | -2.06499 | 0.010294 | 3644790  |
| PWP2        | -2.07361 | 0.005397 | 3640416  |
| MIG1        | -2.08122 | 0.002007 | 3637812  |
| SIZ1        | -2.08195 | 0.002607 | 3640219  |
| C2_02770W_A | -2.08419 | 0.00033  | 3643031  |
| ENP2        | -2.08422 | 0.009624 | 3646234  |
| RIT1        | -2.09032 | 0.029793 | 3638492  |
| YAK1        | -2.09171 | 0.002035 | 3647801  |
| C4_01500W_A | -2.09264 | 0.020784 | 3635617  |
| C6_03290W_A | -2.09436 | 0.002039 | 3639195  |
| C7_01990C_A | -2.0957  | 0.014899 | 3636966  |
| ESA1        | -2.096   | 0.009149 | 3640518  |
| C5_04050W_A | -2.09644 | 0.000276 | 3647735  |
| FGR15       | -2.09789 | 0.010335 | 3638882  |
| C1_09340C_A | -2.09804 | 0.009429 | 3634804  |
| C7_03480W_A | -2.10003 | 0.007868 | 3646230  |
| C1_00520W_A | -2.10003 | 0.009917 | 3639310  |
| CR_07190W_A | -2.10168 | 0.001342 | 3645269  |

|             |          |          |          |
|-------------|----------|----------|----------|
| C6_04290W_A | -2.10378 | 0.001346 | 3646280  |
| C3_00570C_A | -2.10419 | 0.005207 | 3640584  |
| C3_04920C_A | -2.10475 | 0.00955  | 3635268  |
| HGT6        | -2.10629 | 0.006752 | 3638873  |
| CEF1        | -2.11817 | 0.003831 | 3634808  |
| C3_07700W_A | -2.11836 | 0.006181 | 3638457  |
| CR_08400C_A | -2.11924 | 0.007754 | 3642115  |
| RAX2        | -2.12042 | 0.004186 | 3647610  |
| C2_07760W_A | -2.12104 | 0.006854 | 3642298  |
| C1_09040C_A | -2.12201 | 0.029707 | 3634769  |
| YKE2        | -2.1226  | 0.009707 | 30515454 |
| LEU3        | -2.12312 | 0.005751 | 3637757  |
| C6_02330W_A | -2.12417 | 0.001843 | 3645877  |
| C2_01240C_A | -2.12519 | 0.047836 | 3638794  |
| C2_08330W_A | -2.12562 | 0.019962 | 3648166  |
| C1_12680W_A | -2.12737 | 0.003349 | 3646833  |
| C2_07020C_A | -2.12759 | 0.029922 | 3643497  |
| C3_00100W_A | -2.12838 | 0.010427 | 3640567  |
| C1_06440C_A | -2.13191 | 0.0193   | 3639552  |
| CTF1        | -2.13379 | 0.017067 | 3635788  |
| HCH1        | -2.13514 | 0.018791 | 3641626  |
| C1_01850C_A | -2.13624 | 0.008013 | 3645431  |
| C5_01050C_A | -2.13707 | 0.023861 | 3642648  |
| CR_04350C_A | -2.13955 | 0.003094 | 3641001  |
| SPL1        | -2.14479 | 0.001205 | 3638035  |
| PRS5        | -2.14504 | 0.006646 | 3642296  |
| HSE1        | -2.1487  | 0.002716 | 3640407  |
| ZCF9        | -2.14931 | 0.00502  | 3638869  |
| ZCF20       | -2.15088 | 0.007906 | 3647059  |
| C1_11900C_A | -2.15107 | 0.018773 | 3642005  |
| FGR3        | -2.15148 | 0.003241 | 3641179  |
| HCA4        | -2.15186 | 0.009478 | 3637911  |
| EST1        | -2.15283 | 0.00089  | 3636526  |
| C1_11690W_A | -2.15283 | 0.006974 | 3645322  |
| C2_09240C_A | -2.15652 | 0.04664  | 3644064  |
| C1_14250C_A | -2.15817 | 0.005088 | 3643307  |
| C5_04180W_A | -2.15859 | 0.036436 | 3636544  |
| C6_00360C_A | -2.16288 | 0.026752 | 3646083  |
| POP2        | -2.16404 | 0.003451 | 3640301  |
| C1_12950W_A | -2.1642  | 0.005967 | 3636157  |
| CST5        | -2.16541 | 0.022173 | 3645981  |
| MAK5        | -2.16761 | 0.007179 | 3643454  |
| RTG1        | -2.16931 | 0.004971 | 3634929  |
| C4_03740W_A | -2.16947 | 0.00674  | 3645357  |
| C6_04450W_A | -2.17034 | 0.017483 | 3645982  |
| ADE8        | -2.17178 | 0.008069 | 3642999  |
| C7_03280C_A | -2.1798  | 0.004701 | 3641353  |



|             |          |          |          |
|-------------|----------|----------|----------|
| C2_06740W_A | -2.18026 | 0.001162 | 3648024  |
| NAB3        | -2.1807  | 0.001628 | 3639209  |
| CR_02950C_A | -2.18821 | 0.013313 | 3642590  |
| CR_03080C_A | -2.18908 | 0.047119 | 3645104  |
| C2_01190C_A | -2.19033 | 0.049652 | 3638859  |
| CR_05770W_A | -2.1909  | 0.013395 | 3646694  |
| ARD         | -2.19159 | 0.003651 | 3647906  |
| DBP7        | -2.19217 | 0.001369 | 3645903  |
| PDR16       | -2.19417 | 0.005291 | 3644679  |
| SUI3        | -2.19479 | 0.000656 | 3643130  |
| IFF9        | -2.19967 | 0.001647 | 3641008  |
| SSK1        | -2.20087 | 0.002595 | 3636184  |
| NIP7        | -2.20276 | 0.009065 | 3645880  |
| C7_01490W_A | -2.20773 | 0.014801 | 3637051  |
| C2_02120W_A | -2.20779 | 0.006533 | 3635746  |
| RER2        | -2.2078  | 0.005428 | 3636399  |
| MRT4        | -2.20963 | 0.008314 | 3639219  |
| OYE32       | -2.2115  | 0.001674 | 3642919  |
| C5_05140W_A | -2.21466 | 0.014659 | 3636460  |
| C3_02180C_A | -2.2147  | 0.005711 | 3636643  |
| CR_09440C_A | -2.21784 | 0.001395 | 3641937  |
| TBF1        | -2.21911 | 0.015202 | 3637327  |
| C1_11290W_A | -2.22037 | 0.014048 | 3644553  |
| C2_00360C_A | -2.2223  | 0.000211 | 3638825  |
| CKA1        | -2.22336 | 0.002047 | 3639018  |
| C3_05360C_A | -2.22348 | 0.00155  | 3643676  |
| CR_01440C_A | -2.22455 | 0.000456 | 30515374 |
| C2_05670C_A | -2.2262  | 0.042728 | 3645570  |
| C6_00310W_A | -2.23037 | 0.000891 | 3646071  |
| C5_04290C_A | -2.23214 | 0.003295 | 3636455  |
| ISW2        | -2.2411  | 0.012025 | 3642235  |
| TRY2        | -2.24224 | 0.005361 | 3647670  |
| VPS28       | -2.24344 | 0.00684  | 3645794  |
| C7_03210W_A | -2.24354 | 0.018008 | 3641371  |
| CR_02800C_A | -2.24394 | 0.002461 | 3642559  |
| BGL22       | -2.24645 | 0.018249 | 3641935  |
| C2_04080W_A | -2.24871 | 0.003054 | 3637381  |
| BLP1        | -2.24891 | 0.003337 | 30515065 |
| C3_06740W_A | -2.24906 | 0.013879 | 3638503  |
| C2_02200W_A | -2.25374 | 0.011481 | 3635772  |
| C4_05440C_A | -2.25475 | 0.001368 | 3646960  |
| CPP1        | -2.25682 | 0.001381 | 3634865  |
| C1_04220C_A | -2.25911 | 0.011658 | 3644721  |
| PHHB        | -2.25934 | 0.006665 | 3638871  |
| ENP1        | -2.26011 | 0.011746 | 3647861  |
| C6_01350W_A | -2.26358 | 0.003422 | 3641642  |
| C1_10080W_A | -2.26401 | 0.037259 | 3634814  |

|             |          |          |         |
|-------------|----------|----------|---------|
| CR_07670W_A | -2.26786 | 0.007044 | 3647255 |
| CR_10800C_A | -2.27083 | 0.001821 | 3638948 |
| C6_04410C_A | -2.27106 | 0.014084 | 3645950 |
| C1_00460W_A | -2.27192 | 0.014246 | 3639316 |
| C7_02930C_A | -2.27554 | 0.001744 | 3641390 |
| DUS4        | -2.27576 | 0.002173 | 3641580 |
| C2_04770W_A | -2.27688 | 0.01511  | 3647783 |
| C1_09390W_A | -2.27715 | 0.011499 | 3634851 |
| RTG3        | -2.27725 | 0.001801 | 3644423 |
| MPP10       | -2.27847 | 0.000434 | 3647912 |
| C3_07940W_A | -2.27915 | 0.001228 | 3647453 |
| C2_03550C_A | -2.28238 | 0.000555 | 3637338 |
| C1_03120W_A | -2.2846  | 0.000607 | 3636926 |
| C7_00200W_A | -2.28465 | 0.002342 | 3637968 |
| C3_02670W_A | -2.28787 | 0.046178 | 3638405 |
| FGR13       | -2.28887 | 0.024971 | 3648078 |
| C1_01160C_A | -2.28897 | 0.00443  | 3640204 |
| SSF1        | -2.29126 | 0.001697 | 3647085 |
| C2_06480W_A | -2.29313 | 0.003309 | 3646568 |
| SET2        | -2.29406 | 0.004727 | 3643923 |
| C1_10970W_A | -2.29496 | 0.007555 | 3644427 |
| C1_09840C_A | -2.29522 | 0.000422 | 3634848 |
| VPS27       | -2.29805 | 0.000385 | 3639326 |
| C2_02960C_A | -2.29869 | 0.001603 | 3643011 |
| C6_00550W_A | -2.30046 | 0.003977 | 3647144 |
| FRE3        | -2.30233 | 0.041572 | 3641789 |
| C7_01700W_A | -2.30252 | 0.000773 | 3637013 |
| C1_05200C_A | -2.30326 | 0.005498 | 3642466 |
| C2_02630W_A | -2.30402 | 0.013259 | 3635839 |
| GPD1        | -2.305   | 0.000143 | 3643924 |
| C4_06850C_A | -2.30542 | 0.001196 | 3642912 |
| C1_03040W_A | -2.30874 | 0.026166 | 3636842 |
| PDE2        | -2.30917 | 0.001028 | 3636877 |
| LIG1        | -2.31392 | 0.000841 | 3636947 |
| C2_05270W_A | -2.31431 | 0.004351 | 3643470 |
| THI20       | -2.3157  | 0.030494 | 3637387 |
| C3_00500C_A | -2.31654 | 0.009925 | 3640515 |
| C2_05990C_A | -2.3183  | 0.07747  | 3644074 |
| PSP1        | -2.31844 | 0.000482 | 3644551 |
| SWE1        | -2.32587 | 2.18E-05 | 3634866 |
| SEF1        | -2.32839 | 0.002669 | 3644945 |
| RAD1        | -2.33042 | 0.000714 | 3641192 |
| SPO7        | -2.33081 | 0.008808 | 3645576 |
| NAN1        | -2.33257 | 0.006812 | 3637932 |
| C3_00840C_A | -2.33604 | 0.048344 | 3647758 |
| INN1        | -2.33713 | 2.66E-05 | 3642578 |
| C6_02650C_A | -2.34299 | 0.00285  | 3639223 |

|             |          |          |         |
|-------------|----------|----------|---------|
| ZCF35       | -2.34853 | 0.004352 | 3641740 |
| C3_03190C_A | -2.34877 | 0.001859 | 3638427 |
| C7_04090C_A | -2.35065 | 0.000324 | 3643135 |
| C4_03580W_A | -2.35118 | 0.039932 | 3645369 |
| ADAEC       | -2.35756 | 0.000795 | 3637342 |
| C1_06820W_A | -2.35763 | 0.002484 | 3639493 |
| LEU5        | -2.36163 | 0.000528 | 3638838 |
| NDT80       | -2.36418 | 3.52E-05 | 3638840 |
| C2_05980C_A | -2.36737 | 0.02583  | 3644075 |
| C2_10600W_A | -2.36868 | 0.003201 | 3641245 |
| C2_08180C_A | -2.37313 | 0.005576 | 3642317 |
| PPR1        | -2.3735  | 0.004641 | 3636535 |
| DOT4        | -2.37361 | 0.001652 | 3646810 |
| C6_03210C_A | -2.37572 | 0.007461 | 3639178 |
| C7_03850W_A | -2.37713 | 0.01869  | 3643145 |
| CR_00820C_A | -2.37757 | 0.007076 | 3640413 |
| SRP40       | -2.37866 | 0.000751 | 3642605 |
| C1_08710W_A | -2.38029 | 0.008896 | 3634937 |
| C6_03780C_A | -2.38064 | 0.000623 | 3640308 |
| C6_02380W_A | -2.38861 | 0.001473 | 3645883 |
| CR_01090W_A | -2.38925 | 0.000393 | 3640379 |
| SBA1        | -2.39071 | 0.000802 | 3640305 |
| CR_04110W_A | -2.39248 | 0.001772 | 3641026 |
| NMD3        | -2.39741 | 0.000807 | 3646614 |
| C2_08860W_A | -2.40439 | 2.24E-05 | 3645776 |
| CR_03910C_A | -2.40885 | 0.000698 | 3640954 |
| C4_05740C_A | -2.40987 | 0.001286 | 3641806 |
| ZCF29       | -2.41036 | 0.00075  | 3641370 |
| CR_08410W_A | -2.41685 | 0.000973 | 3642116 |
| C1_10890C_A | -2.41996 | 0.000406 | 3644447 |
| UTP18       | -2.42494 | 0.002765 | 3643123 |
| C1_09710C_A | -2.42552 | 0.003168 | 3634818 |
| SSN6        | -2.42597 | 0.000371 | 3638518 |
| FAL1        | -2.42615 | 0.001967 | 3639839 |
| PCL5        | -2.42855 | 0.001642 | 3636466 |
| DOT6        | -2.43703 | 0.000753 | 3640078 |
| C2_02710C_A | -2.43759 | 0.003134 | 3643003 |
| MRF1        | -2.44123 | 0.000547 | 3645321 |
| C2_10050W_A | -2.4459  | 2.33E-05 | 3643949 |
| CR_10420W_A | -2.44601 | 0.000198 | 3638974 |
| BNA4        | -2.45061 | 0.000289 | 3640528 |
| C4_02170C_A | -2.45072 | 0.038824 | 3635667 |
| C3_07900C_A | -2.4525  | 0.004213 | 3647450 |
| C5_00160W_A | -2.45277 | 0.004864 | 3647871 |
| CAN3        | -2.45307 | 0.001309 | 3647066 |
| MRPL40      | -2.45467 | 0.002052 | 3640968 |
| C1_12860C_A | -2.45657 | 0.0237   | 3636179 |

|             |          |          |          |
|-------------|----------|----------|----------|
| C1_02960C_A | -2.4578  | 0.000159 | 3636834  |
| C3_00630W_A | -2.45822 | 0.000138 | 3640576  |
| PTK2        | -2.46278 | 0.000303 | 3641611  |
| DYN1        | -2.46746 | 0.000869 | 3635236  |
| CR_09460C_A | -2.46763 | 0.00064  | 30515453 |
| C1_08350C_A | -2.46893 | 0.000815 | 30515030 |
| CR_06330C_A | -2.47056 | 0.004698 | 3644846  |
| DBP3        | -2.47187 | 0.00083  | 3634868  |
| C2_00810C_A | -2.47206 | 0.018563 | 3638810  |
| C4_00750C_A | -2.4722  | 0.031368 | 3645763  |
| MEC3        | -2.4766  | 0.040264 | 3646910  |
| CR_07690W_A | -2.4767  | 0.039295 | 3648194  |
| SGS1        | -2.48049 | 0.007256 | 3641258  |
| NSA2        | -2.48277 | 0.000367 | 3642259  |
| TRM12       | -2.48362 | 0.014216 | 3641738  |
| C2_00770W_A | -2.48665 | 0.006802 | 3638909  |
| C4_00820W_A | -2.48722 | 0.025606 | 3645741  |
| C2_01250W_A | -2.49345 | 0.015592 | 3638793  |
| C5_00780C_A | -2.49394 | 0.002574 | 3644124  |
| MUC1        | -2.49475 | 0.000743 | 3645771  |
| C3_04940W_A | -2.4952  | 0.000237 | 3635270  |
| C4_07010C_A | -2.49897 | 0.029184 | 3642966  |
| C4_06620C_A | -2.50264 | 0.01939  | 3642813  |
| C4_02570C_A | -2.50309 | 0.006828 | 3637916  |
| C7_04290W_A | -2.50314 | 0.02173  | 3643172  |
| C1_06320W_A | -2.50784 | 0.048271 | 3648118  |
| PGA55       | -2.50965 | 0.001383 | 3645784  |
| CR_08190W_A | -2.51012 | 0.047418 | 3642084  |
| YHB4        | -2.51049 | 0.005757 | 3638999  |
| C3_05460W_A | -2.51124 | 0.008122 | 3643670  |
| C4_01930C_A | -2.513   | 0.015807 | 3635634  |
| C7_01040C_A | -2.51643 | 0.003879 | 3638018  |
| C3_02790W_A | -2.51708 | 0.003319 | 3638416  |
| SPT5        | -2.52029 | 9.58E-05 | 3635847  |
| PIR1        | -2.52094 | 0.001697 | 3645801  |
| HSX11       | -2.5269  | 0.031858 | 3635660  |
| C2_00490W_A | -2.52705 | 9.12E-05 | 3638870  |
| CR_06290C_A | -2.52873 | 0.000715 | 3644856  |
| C4_02110W_A | -2.52995 | 0.004349 | 3635673  |
| C4_00490W_A | -2.53292 | 0.001758 | 3645013  |
| CR_08040W_A | -2.53507 | 0.000995 | 3644135  |
| KNS1        | -2.53546 | 0.00095  | 3636228  |
| C7_03970C_A | -2.536   | 0.003885 | 3643117  |
| CR_03710C_A | -2.53844 | 0.000305 | 3643224  |
| CR_05640C_A | -2.54166 | 0.025215 | 3646690  |
| C2_09160W_A | -2.54248 | 0.0154   | 3644090  |
| URK1        | -2.54556 | 0.00026  | 3635186  |

|             |          |          |          |
|-------------|----------|----------|----------|
| SFP1        | -2.54917 | 0.000517 | 3635225  |
| C3_06370C_A | -2.54923 | 0.000605 | 3642258  |
| RPO41       | -2.54935 | 0.000154 | 3639378  |
| SOF1        | -2.55039 | 0.00012  | 3640585  |
| C7_03000C_A | -2.55256 | 0.001944 | 3641383  |
| CR_07910C_A | -2.55393 | 9.41E-05 | 3644142  |
| HAP43       | -2.55776 | 9.19E-05 | 3644531  |
| C5_02280C_A | -2.55778 | 0.00022  | 3637712  |
| SGD1        | -2.56005 | 0.002145 | 3643191  |
| C2_06800C_A | -2.5611  | 0.001691 | 3643518  |
| C3_07580W_A | -2.56159 | 0.001076 | 30515225 |
| MSN4        | -2.56289 | 8.09E-05 | 3634911  |
| EFG1        | -2.56913 | 7.95E-05 | 3644145  |
| C1_07950C_A | -2.57081 | 0.007728 | 3640724  |
| C6_02230W_A | -2.57274 | 0.000362 | 3645866  |
| CR_07920W_A | -2.57734 | 0.000124 | 3644141  |
| C1_10880W_A | -2.57749 | 0.001182 | 3644449  |
| MNN4        | -2.57755 | 9.69E-05 | 3642784  |
| NOP8        | -2.57905 | 0.007059 | 3646290  |
| C3_07920W_A | -2.58093 | 0.000101 | 30515226 |
| C6_02720C_A | -2.58152 | 0.00015  | 3639212  |
| AOX2        | -2.58843 | 0.046947 | 3634945  |
| C3_00160C_A | -2.5894  | 0.000265 | 3640591  |
| HAP41       | -2.59354 | 0.000842 | 3647405  |
| SLR1        | -2.59827 | 7.1E-05  | 3643957  |
| KRE1        | -2.59904 | 0.000564 | 3643180  |
| C7_02120C_A | -2.60029 | 0.010425 | 3637019  |
| ARG5,6      | -2.60201 | 0.000118 | 3634830  |
| C1_09850C_A | -2.60592 | 8.97E-05 | 3634849  |
| CR_02420W_A | -2.60602 | 0.000993 | 3644926  |
| C1_00370W_A | -2.61125 | 0.028532 | 30514954 |
| CNH1        | -2.61147 | 8.38E-05 | 3648056  |
| C1_09740C_A | -2.61551 | 0.086398 | 30515035 |
| SOD6        | -2.61708 | 0.000301 | 3638899  |
| C6_04550C_A | -2.61766 | 0.000335 | 3645976  |
| C1_01580W_A | -2.61825 | 0.000766 | 3640222  |
| ARG4        | -2.61877 | 0.000325 | 3646237  |
| C5_05340W_A | -2.61977 | 7.42E-05 | 3636400  |
| TBP1        | -2.62127 | 0.000196 | 3647675  |
| TEC1        | -2.62198 | 6.01E-05 | 3635261  |
| C3_04790W_A | -2.62269 | 0.001712 | 3635215  |
| PTR3        | -2.62285 | 0.002606 | 3645428  |
| C2_05830C_A | -2.63032 | 0.002469 | 3647483  |
| FTH2        | -2.63129 | 0.003855 | 3640401  |
| LEU42       | -2.6323  | 6.23E-05 | 3643808  |
| ARO10       | -2.63658 | 0.005766 | 3647320  |
| NAR1        | -2.63979 | 0.000269 | 3634916  |

|             |          |          |          |
|-------------|----------|----------|----------|
| C1_13530W_A | -2.64377 | 0.000591 | 3636170  |
| SST2        | -2.64455 | 0.015311 | 3637754  |
| ATX1        | -2.64575 | 0.009372 | 30515426 |
| C1_12370W_A | -2.64662 | 0.00976  | 3642061  |
| C5_02810W_A | -2.64727 | 0.012893 | 30515304 |
| CDC34       | -2.64966 | 2.5E-05  | 3637028  |
| C3_00940W_A | -2.65089 | 7.03E-05 | 3639851  |
| FHL1        | -2.65114 | 0.00018  | 3643493  |
| C4_02330C_A | -2.65209 | 0.02701  | 3637884  |
| CR_02510W_A | -2.66362 | 6.67E-05 | 3647694  |
| C5_02580W_A | -2.6702  | 0.000436 | 3637721  |
| ERO1        | -2.67235 | 4.08E-05 | 3634810  |
| YAH1        | -2.67437 | 0.0029   | 3638368  |
| GUT1        | -2.67692 | 0.000815 | 3648082  |
| C3_04260W_A | -2.68284 | 0.000328 | 3635140  |
| SVF1        | -2.68349 | 0.000161 | 3639289  |
| LSM6        | -2.68374 | 0.004645 | 30515363 |
| C5_02510C_A | -2.68482 | 0.000547 | 3637767  |
| C5_01290C_A | -2.68571 | 0.00041  | 3642647  |
| CR_05730C_A | -2.68576 | 3.23E-05 | 3646698  |
| CR_10810C_A | -2.68817 | 0.00017  | 3638949  |
| C4_04810C_A | -2.6905  | 0.00043  | 3641112  |
| CR_05910W_A | -2.69479 | 0.002675 | 3646680  |
| C4_02510W_A | -2.69974 | 0.000975 | 3637865  |
| AAH1        | -2.70179 | 0.011057 | 3643529  |
| C7_00040C_A | -2.70268 | 0.007743 | 3638002  |
| TRY3        | -2.70399 | 2.6E-05  | 3642652  |
| C3_02710W_A | -2.70597 | 0.000309 | 30515190 |
| C3_05860C_A | -2.70664 | 0.002297 | 3641759  |
| IRE1        | -2.70701 | 8.75E-05 | 3640726  |
| FCR1        | -2.71613 | 0.000241 | 3638542  |
| ATG15       | -2.71792 | 6.59E-05 | 3641641  |
| CR_00430C_A | -2.71877 | 0.012576 | 30515366 |
| C3_07490W_A | -2.7218  | 1.94E-05 | 3638528  |
| C3_06270C_A | -2.72213 | 0.001325 | 3642239  |
| DAL1        | -2.72464 | 0.004929 | 3640564  |
| SSU72       | -2.72488 | 0.000394 | 3645129  |
| RMS1        | -2.73442 | 0.000872 | 3646361  |
| C6_01040C_A | -2.73696 | 0.000327 | 3644014  |
| CKA2        | -2.74039 | 0.000111 | 3643444  |
| C7_01070C_A | -2.74153 | 2.69E-05 | 3637949  |
| AUR1        | -2.74384 | 4.28E-05 | 3642617  |
| C4_00610W_A | -2.74597 | 0.000848 | 3645770  |
| C2_09500W_A | -2.74922 | 8.1E-05  | 3643817  |
| FRP6        | -2.75105 | 4.03E-05 | 3641601  |
| C2_02820C_A | -2.75109 | 0.000416 | 3643027  |
| C4_07210W_A | -2.75143 | 0.001584 | 3642959  |

|             |          |          |          |
|-------------|----------|----------|----------|
| C2_07580W_A | -2.75512 | 0.01763  | 3645216  |
| C5_00310C_A | -2.7601  | 0.000261 | 3641576  |
| IFM3        | -2.76148 | 0.009523 | 3642335  |
| C5_03740W_A | -2.76373 | 0.00016  | 3647237  |
| C2_03000C_A | -2.76731 | 0.00157  | 3643022  |
| CR_00460C_A | -2.76899 | 0.000738 | 3639726  |
| C4_06790W_A | -2.76907 | 0.000536 | 3642918  |
| HNM1        | -2.76916 | 7.06E-06 | 3638857  |
| PMC1        | -2.77615 | 1.33E-05 | 3636627  |
| MSS116      | -2.77634 | 0.000398 | 3634792  |
| TOK1        | -2.78042 | 9.17E-05 | 3645754  |
| C1_13880C_A | -2.78602 | 8.45E-07 | 3636133  |
| SIR2        | -2.78642 | 0.00148  | 3638845  |
| C2_04850C_A | -2.78679 | 5.12E-05 | 3648114  |
| MNL1        | -2.79056 | 1.78E-06 | 3646050  |
| C2_00410C_A | -2.79095 | 0.000218 | 3638820  |
| TPT1        | -2.79147 | 0.000916 | 3640543  |
| C1_01890C_A | -2.79545 | 5.35E-05 | 3645427  |
| CR_06060W_A | -2.79572 | 0.001881 | 6335358  |
| GCS1        | -2.79644 | 4.14E-05 | 3640742  |
| C7_01150W_A | -2.79749 | 0.001188 | 3645913  |
| CR_05540C_A | -2.80109 | 4.55E-05 | 3647594  |
| CPH2        | -2.80962 | 2.41E-05 | 3646067  |
| C4_00460C_A | -2.8128  | 1.95E-05 | 3645010  |
| C1_13380W_A | -2.81395 | 0.011673 | 3636217  |
| C1_01140C_A | -2.81526 | 2.24E-05 | 3640202  |
| C2_03150C_A | -2.81559 | 0.010677 | 3642990  |
| C2_04520C_A | -2.81929 | 0.018258 | 3645447  |
| C1_00980W_A | -2.82023 | 0.007852 | 30514959 |
| NOP13       | -2.82448 | 3.2E-05  | 3638469  |
| C1_07130C_A | -2.82623 | 6.5E-05  | 3644462  |
| C1_10360C_A | -2.82693 | 2.97E-07 | 3634836  |
| UGT51C1     | -2.82849 | 4.98E-06 | 3640147  |
| NOT5        | -2.82971 | 9.74E-06 | 3640763  |
| MOH1        | -2.83242 | 0.003251 | 3646809  |
| RPA34       | -2.83943 | 0.000829 | 3634883  |
| CR_02970C_A | -2.84114 | 1.73E-05 | 3642603  |
| CR_06980W_A | -2.84769 | 0.015742 | 3645735  |
| C2_06620W_A | -2.85467 | 0.015133 | 3646564  |
| C7_03270W_A | -2.85663 | 0.001507 | 3641365  |
| CR_07830C_A | -2.8569  | 1.99E-05 | 3647345  |
| DIP2        | -2.86413 | 0.00025  | 3640762  |
| C5_04170W_A | -2.86791 | 1.32E-05 | 3636543  |
| MRPL36      | -2.86808 | 0.001009 | 3643733  |
| FAB1        | -2.87221 | 0.000149 | 3635766  |
| C2_07060W_A | -2.87258 | 0.000313 | 3643500  |
| BUD21       | -2.87549 | 9.87E-05 | 3640541  |

|             |          |          |          |
|-------------|----------|----------|----------|
| C6_04300W_A | -2.8817  | 0.000329 | 3646286  |
| IML1        | -2.88447 | 1.29E-05 | 3636813  |
| C2_06510W_A | -2.88462 | 0.000145 | 3646570  |
| C1_10250C_A | -2.88635 | 0.018362 | 3634882  |
| STF2        | -2.88676 | 0.000223 | 30515083 |
| C1_07660W_A | -2.8917  | 0.002779 | 3646656  |
| PSO2        | -2.89606 | 0.006833 | 3641241  |
| KTI12       | -2.89738 | 0.000114 | 3645140  |
| ATO2        | -2.90277 | 0.001358 | 3639845  |
| STD1        | -2.90343 | 5.23E-05 | 3647459  |
| BUD22       | -2.90367 | 0.000215 | 3640391  |
| C4_03190W_A | -2.90524 | 0.000145 | 3637838  |
| C6_04140C_A | -2.90917 | 1.44E-05 | 3647970  |
| FMT1        | -2.91017 | 0.000306 | 3646530  |
| FZO1        | -2.9118  | 9.03E-06 | 3646848  |
| C3_03300C_A | -2.91291 | 1.29E-05 | 3638361  |
| C1_02850W_A | -2.91769 | 0.000303 | 3636862  |
| C4_07220C_A | -2.91914 | 5.07E-05 | 3642955  |
| PUT2        | -2.92312 | 1.28E-05 | 3636439  |
| PEP12       | -2.92358 | 0.000133 | 3637737  |
| CAP1        | -2.92427 | 2.64E-05 | 3636640  |
| C5_03410C_A | -2.93605 | 0.007711 | 3646347  |
| C4_03460C_A | -2.93783 | 0.040435 | 3646813  |
| KRE6        | -2.93959 | 0.00024  | 3641756  |
| IFH1        | -2.94086 | 0.000534 | 3637770  |
| C2_03500W_A | -2.9495  | 6.84E-08 | 3637345  |
| VPS21       | -2.94998 | 2.56E-06 | 3642092  |
| C3_06600C_A | -2.96565 | 0.000927 | 3642280  |
| HST2        | -2.97174 | 0.003963 | 3640162  |
| PHO4        | -2.97845 | 9.4E-05  | 3641817  |
| CUP2        | -2.98735 | 7.73E-06 | 3636189  |
| LAS1        | -2.98928 | 5.09E-05 | 3644073  |
| C4_01420W_A | -2.99582 | 0.001492 | 3635626  |
| C1_03750W_A | -2.99632 | 0.000109 | 3644690  |
| BOI2        | -2.99879 | 0.000256 | 3640404  |
| NCS2        | -2.99885 | 4.28E-07 | 3643216  |
| MNN4-4      | -3.00077 | 0.005213 | 3639250  |
| C6_04050W_A | -3.00715 | 0.000223 | 3647830  |
| CR_02930W_A | -3.00773 | 1.11E-07 | 3642588  |
| STP2        | -3.00846 | 1.02E-05 | 3636214  |
| C2_03760C_A | -3.00866 | 3.63E-07 | 3637371  |
| C1_14480W_A | -3.00873 | 0.000731 | 3643328  |
| MRPL27      | -3.0142  | 4.1E-05  | 3636884  |
| SHA3        | -3.01655 | 0.00013  | 3644580  |
| C3_06160C_A | -3.0166  | 2.82E-05 | 3641766  |
| C4_04660C_A | -3.01762 | 7.05E-06 | 3641150  |
| PTP2        | -3.01905 | 6.35E-07 | 3647858  |



|             |          |          |          |
|-------------|----------|----------|----------|
| NOG2        | -3.0493  | 0.000669 | 3640299  |
| CR_05150W_A | -3.05157 | 0.02617  | 30515403 |
| C2_01510C_A | -3.0516  | 0.025954 | 3635801  |
| C2_08850C_A | -3.05286 | 1.31E-05 | 3643890  |
| HSP104      | -3.05393 | 4.06E-05 | 3642097  |
| RRS1        | -3.05566 | 0.000141 | 3639352  |
| C6_03460W_A | -3.06215 | 1.07E-08 | 3640252  |
| CR_10400W_A | -3.06645 | 2.23E-05 | 3638956  |
| RAS2        | -3.06806 | 1.62E-05 | 3635211  |
| ADA2        | -3.06948 | 1E-05    | 3644450  |
| NOP4        | -3.07113 | 0.000115 | 3647991  |
| SOK1        | -3.08073 | 8.85E-06 | 3642495  |
| C1_07160C_A | -3.08159 | 0.000199 | 30515020 |
| C2_07040W_A | -3.08394 | 0.000134 | 3643499  |
| C3_07550C_A | -3.09277 | 7.74E-06 | 3638525  |
| ZSF1        | -3.09451 | 5.82E-05 | 3641257  |
| C3_04540C_A | -3.09865 | 6.37E-06 | 3635262  |
| OSM1        | -3.101   | 3.25E-06 | 3645573  |
| C2_06660W_A | -3.10144 | 0.008762 | 3648418  |
| C7_01210C_A | -3.10241 | 0.000554 | 3645904  |
| C5_03920C_A | -3.10805 | 6.52E-05 | 3647448  |
| C4_01860C_A | -3.11005 | 7.52E-06 | 3635590  |
| C1_04510W_A | -3.11024 | 0.005035 | 3646147  |
| BMT9        | -3.11072 | 0.000184 | 3635654  |
| C3_05440C_A | -3.11211 | 0.004013 | 3643668  |
| C1_10230C_A | -3.11237 | 2.36E-05 | 3634880  |
| C1_11620W_A | -3.11936 | 0.010405 | 3645344  |
| C2_00090W_A | -3.11972 | 0.002322 | 3647910  |
| C1_06380C_A | -3.11978 | 0.007021 | 3639559  |
| C1_06760C_A | -3.12153 | 2.12E-05 | 3639505  |
| PDR6        | -3.12179 | 0.000184 | 3638824  |
| CDG1        | -3.13025 | 0.000202 | 3641883  |
| MSB2        | -3.1323  | 3.58E-06 | 3635830  |
| CR_00750C_A | -3.13565 | 8.52E-06 | 3640438  |
| RCA1        | -3.13575 | 2.02E-05 | 3639303  |
| C2_01540W_A | -3.13665 | 0.00118  | 3635804  |
| C1_09330W_A | -3.14306 | 0.005501 | 3634802  |
| ZCF27       | -3.14686 | 2.67E-05 | 3635631  |
| NAG1        | -3.14722 | 0.000248 | 3645966  |
| C5_00390C_A | -3.14792 | 1.1E-05  | 3641552  |
| TCC1        | -3.14825 | 4.46E-06 | 3638524  |
| ARO80       | -3.15083 | 0.000586 | 3636808  |
| SFT2        | -3.15185 | 0.001085 | 3644442  |
| DFG16       | -3.15187 | 1.59E-05 | 3637413  |
| CNS1        | -3.15449 | 8.24E-05 | 3639365  |
| C4_04460C_A | -3.16896 | 8.75E-06 | 3641127  |
| CR_10470C_A | -3.17171 | 1.07E-05 | 3638979  |

|             |          |          |          |
|-------------|----------|----------|----------|
| CR_01370C_A | -3.17244 | 5.55E-05 | 3640168  |
| PLB3        | -3.17365 | 2.26E-06 | 3647089  |
| NCR1        | -3.18098 | 3.14E-07 | 3643314  |
| C1_14580C_A | -3.18409 | 0.000175 | 3643290  |
| CCS1        | -3.19009 | 3.99E-07 | 3644476  |
| ROT1        | -3.19181 | 0.001762 | 3639350  |
| C7_01610W_A | -3.19549 | 0.000228 | 30515353 |
| RRP15       | -3.19713 | 1.29E-05 | 3648397  |
| RIM2        | -3.19726 | 0.002596 | 3645448  |
| BUD14       | -3.19906 | 1.1E-07  | 3643469  |
| CR_03870W_A | -3.19957 | 0.000974 | 3643187  |
| C1_11570W_A | -3.20169 | 0.024444 | 30515055 |
| C3_06820C_A | -3.20665 | 3.53E-07 | 3638544  |
| NBP2        | -3.20713 | 2.24E-05 | 3636963  |
| CR_10430C_A | -3.21043 | 0.026425 | 3638975  |
| C7_00590W_A | -3.21125 | 7.42E-05 | 3637994  |
| PNC1        | -3.21311 | 0.000247 | 3646232  |
| RGS2        | -3.22102 | 4.32E-06 | 3646629  |
| C5_02440C_A | -3.2298  | 0.000676 | 3637728  |
| MET2        | -3.23518 | 1.08E-05 | 3640070  |
| SAS10       | -3.23647 | 0.000406 | 3637899  |
| C6_00700C_A | -3.23745 | 4.81E-05 | 3647074  |
| C4_04010W_A | -3.24085 | 0.000453 | 3641218  |
| C2_00200W_A | -3.24527 | 1.21E-05 | 3638903  |
| C6_02970C_A | -3.247   | 0.000972 | 3639190  |
| RSM22       | -3.25    | 0.000137 | 3642506  |
| C5_03960W_A | -3.25121 | 4.21E-07 | 3647444  |
| HSP70       | -3.25129 | 3.15E-05 | 3636229  |
| C2_05060C_A | -3.25456 | 0.004758 | 3643451  |
| BAS1        | -3.25774 | 1.68E-06 | 3641136  |
| C6_03520C_A | -3.26754 | 0.034464 | 3640259  |
| C2_00280C_A | -3.26837 | 9.7E-05  | 3638802  |
| C1_07560W_A | -3.26851 | 0.000108 | 3646676  |
| C1_06470W_A | -3.30131 | 5.31E-07 | 30515007 |
| CR_00040C_A | -3.30205 | 4.13E-06 | 3639675  |
| C6_03370W_A | -3.31536 | 1.63E-05 | 3639230  |
| C1_05270C_A | -3.31712 | 7.43E-05 | 3642476  |
| C7_02160W_A | -3.31777 | 0.000682 | 3636994  |
| UPC2        | -3.3193  | 5.61E-05 | 3646489  |
| C6_00290W_A | -3.3215  | 6.61E-06 | 3646069  |
| NBN1        | -3.32208 | 1.89E-05 | 3637410  |
| C1_10140C_A | -3.32771 | 1.04E-05 | 3634780  |
| SHY1        | -3.33782 | 1.36E-05 | 3634824  |
| OPT7        | -3.33949 | 0.002156 | 3645008  |
| C6_04240W_A | -3.34029 | 0.002248 | 3646276  |
| RPF1        | -3.34144 | 1.27E-06 | 3637890  |
| C2_10170C_A | -3.34284 | 1.17E-06 | 3643931  |

|             |          |          |          |
|-------------|----------|----------|----------|
| C4_05590W_A | -3.34723 | 5.1E-06  | 3641776  |
| C1_12150C_A | -3.34942 | 0.005135 | 3642049  |
| SDS24       | -3.35288 | 5.96E-06 | 3640756  |
| PRB1        | -3.36239 | 1.16E-05 | 3643521  |
| C4_02090C_A | -3.36395 | 2.85E-06 | 3635642  |
| TSR2        | -3.36546 | 2.8E-05  | 3636845  |
| ARG81       | -3.37665 | 2.32E-06 | 3634775  |
| SMD2        | -3.37835 | 0.011809 | 30515133 |
| C1_11000C_A | -3.38329 | 2.51E-05 | 3644422  |
| C2_10810W_A | -3.40095 | 8.64E-06 | 3641243  |
| C3_01090W_A | -3.40323 | 0.001074 | 30515176 |
| C1_10060C_A | -3.41261 | 0.003562 | 3634812  |
| C1_07220W_A | -3.41362 | 1.06E-06 | 3644460  |
| PDX3        | -3.4137  | 6.45E-10 | 3640949  |
| ELP3        | -3.41429 | 1.95E-06 | 3641747  |
| BUL4        | -3.41627 | 0.000678 | 3642037  |
| C1_08700W_A | -3.41788 | 7.52E-10 | 3634936  |
| C2_00650W_A | -3.4251  | 1.14E-05 | 3638889  |
| C6_02290C_A | -3.43065 | 9.15E-06 | 3645873  |
| HPT1        | -3.43583 | 4.67E-07 | 3643034  |
| GZF3        | -3.43677 | 3.67E-09 | 3642563  |
| PHO86       | -3.43801 | 0.000218 | 3642323  |
| SPO72       | -3.44545 | 2.45E-07 | 3644072  |
| C5_03150W_A | -3.44693 | 2.52E-07 | 3637799  |
| C2_09820W_A | -3.44946 | 9.2E-07  | 3643801  |
| C3_07070C_A | -3.45387 | 9.57E-05 | 3638446  |
| GNP3        | -3.4547  | 4.28E-05 | 3639027  |
| MSS51       | -3.45482 | 4.06E-05 | 3639031  |
| PRP5        | -3.45524 | 2.88E-06 | 3638447  |
| C4_00060W_A | -3.45734 | 6.06E-05 | 3648061  |
| IFM1        | -3.45801 | 2.25E-06 | 3641389  |
| C4_01970W_A | -3.45854 | 8.23E-06 | 3635663  |
| C1_04720W_A | -3.46466 | 3.25E-05 | 30514988 |
| PAM18       | -3.47079 | 0.000995 | 3645747  |
| C1_08630W_A | -3.47234 | 8.12E-06 | 3634928  |
| C1_08840W_A | -3.47623 | 0.043266 | 3634919  |
| C3_02920W_A | -3.47815 | 1.99E-07 | 3638379  |
| ZCF30       | -3.47853 | 1.3E-06  | 3642051  |
| POP4        | -3.48883 | 0.000554 | 3639241  |
| FCY24       | -3.49244 | 0.003729 | 3641902  |
| DAL5        | -3.49958 | 0.000786 | 3638401  |
| TUS1        | -3.50317 | 1.38E-07 | 3646144  |
| C1_09240C_A | -3.50476 | 0.057284 | 3634901  |
| C2_07250C_A | -3.50896 | 0.006435 | 3643487  |
| C5_04860C_A | -3.50927 | 0.009034 | 3636437  |
| C1_14190C_A | -3.50962 | 5.35E-06 | 3643300  |
| C2_05750W_A | -3.51284 | 8.88E-05 | 3645577  |

|             |          |          |          |
|-------------|----------|----------|----------|
| C7_02110W_A | -3.52402 | 1.26E-06 | 3637022  |
| C1_10440W_A | -3.5352  | 0.000124 | 3647180  |
| CTM1        | -3.54765 | 7.3E-09  | 3638951  |
| DUR32       | -3.55125 | 0.001726 | 3636142  |
| UGA3        | -3.55529 | 1.63E-06 | 3638926  |
| C2_09980W_A | -3.55556 | 2.58E-06 | 3643965  |
| CR_10040W_A | -3.55699 | 0.000715 | 3639034  |
| C6_04530C_A | -3.56005 | 4.39E-07 | 3645970  |
| C6_02980C_A | -3.57156 | 8.22E-06 | 3639192  |
| RXT3        | -3.57297 | 5.79E-06 | 3643431  |
| CDR4        | -3.5836  | 2.96E-05 | 3640711  |
| C3_04720C_A | -3.58586 | 8.6E-07  | 3635249  |
| CAG1        | -3.58823 | 0.000653 | 3636469  |
| C1_13390W_A | -3.58923 | 0.000228 | 3636218  |
| C1_02450C_A | -3.6036  | 5.95E-05 | 3636849  |
| DES1        | -3.60377 | 2.64E-07 | 3636529  |
| CSP2        | -3.60519 | 0.024199 | 3645749  |
| ADR1        | -3.60675 | 1.99E-06 | 3637866  |
| MLH3        | -3.61386 | 2.15E-06 | 3643294  |
| C2_04110W_A | -3.61721 | 0.005979 | 3637378  |
| C1_11880W_A | -3.61767 | 0.000237 | 3642007  |
| C3_06420C_A | -3.61887 | 2.22E-06 | 3642262  |
| C1_14350W_A | -3.62138 | 1.1E-07  | 3643281  |
| SLM2        | -3.62321 | 3.35E-08 | 3647559  |
| C1_11580W_A | -3.62434 | 4.06E-06 | 3645330  |
| CR_09610C_A | -3.63622 | 4.35E-05 | 3647094  |
| PAM16       | -3.63712 | 3.41E-05 | 3643321  |
| ISU1        | -3.64232 | 3.82E-07 | 3637007  |
| CR_09800C_A | -3.64497 | 2.26E-06 | 3638984  |
| CR_06970C_A | -3.65183 | 1.15E-05 | 3645736  |
| BUD5        | -3.65295 | 2.57E-05 | 3647315  |
| MSN5        | -3.66681 | 1.07E-06 | 3637889  |
| CR_08680C_A | -3.66995 | 1.04E-07 | 3642127  |
| C3_03200C_A | -3.6744  | 0.013744 | 3638428  |
| C7_03500W_A | -3.67542 | 2.35E-05 | 3646246  |
| ISY1        | -3.68334 | 4.3E-05  | 3646233  |
| CPA2        | -3.68389 | 2.69E-07 | 3640385  |
| HNT1        | -3.6857  | 2.54E-09 | 3644441  |
| C6_00980C_A | -3.68655 | 3.96E-05 | 3644046  |
| NAT4        | -3.68806 | 6.02E-05 | 3635704  |
| C2_00540W_A | -3.69072 | 5.11E-08 | 3638865  |
| C6_01340C_A | -3.69247 | 0.000725 | 30515331 |
| C7_00260C_A | -3.70413 | 3.64E-08 | 3637978  |
| C1_06510C_A | -3.70777 | 2.19E-07 | 3639549  |
| GAP4        | -3.71968 | 2.25E-07 | 3644463  |
| C2_10790C_A | -3.72788 | 1.14E-05 | 3641242  |
| C6_04510C_A | -3.7326  | 2.62E-06 | 3645955  |

|             |          |          |          |
|-------------|----------|----------|----------|
| C4_05970W_A | -3.73413 | 2.57E-08 | 3646514  |
| C1_06840C_A | -3.7373  | 2.93E-06 | 30515012 |
| CR_03160W_A | -3.74083 | 0.000557 | 3645117  |
| CR_03480W_A | -3.74249 | 0.019886 | 3643199  |
| C1_03140W_A | -3.75653 | 4.31E-05 | 3636929  |
| C5_00570W_A | -3.77226 | 5.48E-10 | 3641589  |
| C6_02020C_A | -3.77269 | 2.37E-06 | 3647563  |
| C5_02320C_A | -3.7733  | 6.87E-06 | 3637788  |
| C1_00860W_A | -3.77428 | 0.000391 | 3639358  |
| OPY2        | -3.77676 | 7.29E-08 | 3640765  |
| C2_08450W_A | -3.7796  | 1.11E-05 | 3643905  |
| C1_07150W_A | -3.79366 | 0.002485 | 30515019 |
| HGT18       | -3.79734 | 0.000435 | 3645111  |
| REI1        | -3.80962 | 3.74E-05 | 3647536  |
| REG1        | -3.81112 | 7.28E-08 | 3638858  |
| SRR1        | -3.81373 | 0.002217 | 3647589  |
| SPT14       | -3.8239  | 6.69E-07 | 3641019  |
| RRN11       | -3.82621 | 6.45E-05 | 3645276  |
| C5_02070C_A | -3.83493 | 1.52E-08 | 3643746  |
| ATS1        | -3.84086 | 3.5E-06  | 3642079  |
| MIF2        | -3.84256 | 1.07E-06 | 3639220  |
| JEN2        | -3.84528 | 0.020478 | 3641214  |
| C3_02630C_A | -3.84851 | 4.26E-06 | 3638328  |
| SSY5        | -3.8558  | 1.53E-08 | 3642140  |
| SMC6        | -3.85831 | 2.06E-06 | 3637039  |
| RPD3        | -3.8586  | 5.69E-07 | 3642580  |
| C1_10120C_A | -3.85877 | 1.06E-06 | 3634779  |
| C5_03800W_A | -3.87303 | 2.62E-06 | 3647230  |
| NPR2        | -3.87533 | 3E-06    | 3638360  |
| PRP8        | -3.88249 | 1.39E-10 | 3642125  |
| CR_04710W_A | -3.8843  | 0.008513 | 3648141  |
| C2_02920W_A | -3.88778 | 3.75E-08 | 3643016  |
| TPO4        | -3.90346 | 2.61E-06 | 3640956  |
| C5_02590C_A | -3.91171 | 0.001487 | 3637723  |
| C3_07370W_A | -3.91552 | 1.29E-07 | 3638474  |
| C3_01770C_A | -3.92672 | 0.000229 | 3636588  |
| ICL1        | -3.94927 | 0.000104 | 3646146  |
| C7_01020C_A | -3.9529  | 1.66E-05 | 3638020  |
| C3_05850W_A | -3.95498 | 5.87E-06 | 3641758  |
| HRR25       | -3.9552  | 4.92E-10 | 3645878  |
| C1_00580W_A | -3.95935 | 0.000108 | 3639361  |
| C2_00690W_A | -3.96028 | 0.000555 | 3638885  |
| C3_07670W_A | -3.96088 | 1.09E-11 | 3638460  |
| IFR1        | -3.96428 | 0.00326  | 3643930  |
| SPO11       | -3.9691  | 0.006474 | 3643873  |
| PGA41       | -3.96954 | 0.00788  | 3642800  |
| C2_09660W_A | -3.97047 | 9.07E-07 | 3643793  |

|             |          |          |          |
|-------------|----------|----------|----------|
| PEX5        | -3.97562 | 1.67E-07 | 3645026  |
| C2_09790W_A | -3.97857 | 2.52E-05 | 3643804  |
| HSK3        | -4.00441 | 4.24E-05 | 3635730  |
| DAC1        | -4.01463 | 4.09E-05 | 3645967  |
| MHP1        | -4.02443 | 2.78E-09 | 3642460  |
| C5_04120C_A | -4.02685 | 9.17E-06 | 3636522  |
| C5_03460C_A | -4.02802 | 8.27E-05 | 3646345  |
| ALD6        | -4.02964 | 5.79E-05 | 3647407  |
| C2_00640W_A | -4.04453 | 0.0001   | 3638847  |
| UTP9        | -4.04708 | 1.3E-08  | 3638451  |
| C1_01630W_A | -4.04763 | 2.38E-08 | 3640194  |
| C6_04200C_A | -4.04804 | 0.001029 | 30515344 |
| CR_06550C_A | -4.05012 | 7.85E-07 | 3645260  |
| HAP2        | -4.05461 | 7.14E-09 | 3641800  |
| C1_01150C_A | -4.0566  | 1.94E-07 | 3640203  |
| C1_12750C_A | -4.05786 | 3.7E-05  | 3646818  |
| C3_04620C_A | -4.06369 | 0.000754 | 3635155  |
| C5_02020C_A | -4.06379 | 5.64E-08 | 3643771  |
| GCA1        | -4.06696 | 1.5E-06  | 3634903  |
| CEK2        | -4.0713  | 0.001131 | 3642459  |
| LIP4        | -4.07331 | 2.9E-06  | 3645987  |
| C3_02420C_A | -4.07648 | 0.000136 | 3638342  |
| GYP7        | -4.07708 | 6.34E-08 | 3646245  |
| C6_01620W_A | -4.07769 | 1.79E-05 | 3641647  |
| C2_07800W_A | -4.07883 | 0.001915 | 3642325  |
| WAR1        | -4.083   | 3.99E-08 | 3644691  |
| C3_06700C_A | -4.09329 | 1.45E-08 | 3642247  |
| C5_00130C_A | -4.1037  | 1.09E-07 | 3647881  |
| ISA2        | -4.11204 | 1.38E-06 | 3638513  |
| C1_11020W_A | -4.12561 | 4.95E-06 | 3644420  |
| C4_00690C_A | -4.12883 | 3.09E-07 | 3645752  |
| MAK16       | -4.13329 | 4.93E-05 | 3646920  |
| C1_05370C_A | -4.14354 | 1.76E-07 | 3642481  |
| NOP6        | -4.14733 | 1.49E-07 | 3639507  |
| C4_01230C_A | -4.16147 | 9.83E-06 | 3635706  |
| C1_05930C_A | -4.16586 | 3.71E-08 | 3639862  |
| MRPL37      | -4.18164 | 0.000891 | 3644782  |
| C3_02750W_A | -4.1843  | 0.009426 | 3638411  |
| CCE1        | -4.18532 | 0.010249 | 3640395  |
| CDR1        | -4.18853 | 3.24E-08 | 3635237  |
| DFI1        | -4.1963  | 2.68E-09 | 3638038  |
| CR_01710W_A | -4.19812 | 0.00023  | 3640130  |
| ALS5        | -4.20306 | 5.56E-09 | 3640277  |
| C3_05450C_A | -4.21204 | 2.54E-07 | 3643669  |
| C2_06090W_A | -4.22132 | 5.67E-09 | 3644097  |
| C5_01560C_A | -4.23277 | 1.34E-07 | 3647064  |
| HIP1        | -4.23695 | 4.24E-11 | 3643761  |

|             |          |          |          |
|-------------|----------|----------|----------|
| BRE1        | -4.23818 | 5.1E-08  | 3641568  |
| C2_10090C_A | -4.2497  | 7.12E-06 | 3643939  |
| C5_01470C_A | -4.26267 | 0.00119  | 3647050  |
| C3_02910W_A | -4.27687 | 0.000324 | 3638378  |
| ROA1        | -4.28398 | 1.03E-07 | 3645424  |
| C2_02110C_A | -4.28948 | 0.000393 | 3635745  |
| CHR1        | -4.30648 | 5.77E-08 | 3647601  |
| NAG6        | -4.30894 | 3.61E-11 | 3645961  |
| TRK1        | -4.31609 | 6.03E-10 | 3644153  |
| CR_02030C_A | -4.32563 | 3.96E-06 | 3640152  |
| C6_00520W_A | -4.333   | 0.007107 | 3647147  |
| CSP1        | -4.33333 | 0.010008 | 3648242  |
| CR_04820W_A | -4.33605 | 3.92E-08 | 3647298  |
| FLO8        | -4.33961 | 8.75E-10 | 3646292  |
| TOR1        | -4.35114 | 2.9E-10  | 3643480  |
| C7_00350C_A | -4.35184 | 6.4E-09  | 3638039  |
| C4_07170C_A | -4.35227 | 0.00072  | 30515289 |
| OLE2        | -4.35433 | 2.02E-09 | 3643503  |
| C3_00340W_A | -4.36538 | 0.000385 | 3640544  |
| IFF6        | -4.36721 | 2.07E-09 | 3644087  |
| CCC2        | -4.36801 | 1.27E-08 | 3637821  |
| YME1        | -4.37722 | 4.66E-09 | 3641816  |
| C5_01710C_A | -4.39686 | 2.28E-05 | 3643732  |
| TCO89       | -4.39782 | 1.75E-08 | 3644788  |
| C1_14380C_A | -4.40413 | 3.32E-07 | 3643285  |
| CKS1        | -4.41179 | 8.61E-07 | 3647732  |
| C1_09520C_A | -4.42014 | 2.08E-09 | 3634766  |
| FUN31       | -4.43455 | 1.34E-09 | 3642249  |
| C6_04180W_A | -4.44797 | 3.76E-09 | 3648176  |
| C6_03800C_A | -4.45094 | 1.79E-07 | 3640310  |
| CIRT4B      | -4.45167 | 4.53E-09 | 3642560  |
| FGR23       | -4.45996 | 1.09E-07 | 3636555  |
| ECM1        | -4.46274 | 1.09E-06 | 3641224  |
| C3_00030C_A | -4.47272 | 2.22E-07 | 3640571  |
| CR_02550C_A | -4.47896 | 8.14E-07 | 3647689  |
| C2_05840W_A | -4.47952 | 1.79E-05 | 3647484  |
| C3_02890C_A | -4.49275 | 0.00199  | 3638336  |
| MED3        | -4.4983  | 5E-06    | 3646522  |
| CR_03980W_A | -4.50191 | 4.79E-07 | 3640964  |
| C4_00100C_A | -4.50694 | 4.88E-08 | 3645004  |
| CR_03840C_A | -4.51802 | 0.007075 | 3643184  |
| C3_02040C_A | -4.52288 | 5.56E-07 | 3636579  |
| C3_07400W_A | -4.53207 | 1.81E-06 | 3638471  |
| CR_08420W_A | -4.54692 | 3.18E-09 | 3642117  |
| CR_03360W_A | -4.54927 | 3.86E-08 | 3645141  |
| C4_03020W_A | -4.55202 | 8.34E-14 | 3637934  |
| ECM21       | -4.55474 | 2.6E-12  | 3634784  |

|             |          |          |          |
|-------------|----------|----------|----------|
| SNQ2        | -4.55633 | 1.5E-10  | 3640290  |
| C3_01430W_A | -4.55739 | 7.19E-06 | 3636633  |
| C3_06240C_A | -4.55984 | 0.013344 | 30515213 |
| C6_00170C_A | -4.57347 | 3.37E-11 | 3647903  |
| KTI11       | -4.58212 | 0.002562 | 30515125 |
| C7_00330C_A | -4.58361 | 3.34E-07 | 3638042  |
| LPI9        | -4.61016 | 2.8E-12  | 3637060  |
| YTH1        | -4.61469 | 1.18E-12 | 3645572  |
| BMT5        | -4.62735 | 2.3E-11  | 3635781  |
| C6_02660C_A | -4.63528 | 6.25E-05 | 3639224  |
| SIP5        | -4.63821 | 7.9E-09  | 3639865  |
| ABC1        | -4.65579 | 2.63E-07 | 3640239  |
| C5_04530W_A | -4.66229 | 2.29E-08 | 3636507  |
| C2_02280W_A | -4.67732 | 4.64E-10 | 3635806  |
| C4_03350C_A | -4.69815 | 1.36E-06 | 3646794  |
| C2_02270C_A | -4.71277 | 5.57E-07 | 3635805  |
| RIM21       | -4.7147  | 6E-09    | 3643739  |
| CYC3        | -4.71473 | 1.53E-11 | 3642621  |
| RRN3        | -4.71936 | 4.5E-08  | 3647925  |
| C1_09130W_A | -4.72419 | 5.14E-11 | 3634943  |
| CR_00810W_A | -4.72569 | 9.94E-05 | 3640415  |
| LTV1        | -4.7344  | 1.22E-07 | 3639016  |
| C5_04080C_A | -4.73779 | 8.38E-09 | 3647731  |
| CR_10760C_A | -4.74568 | 1.5E-05  | 3638943  |
| C1_07980C_A | -4.74903 | 4.56E-10 | 3640696  |
| C1_01710W_A | -4.75956 | 2.4E-10  | 3640201  |
| C3_01130C_A | -4.76524 | 4.62E-09 | 3639901  |
| C1_05790W_A | -4.76743 | 5.36E-05 | 30515002 |
| EBP1        | -4.7735  | 6.35E-09 | 3644060  |
| CR_10060W_A | -4.7737  | 1.91E-12 | 3639035  |
| C2_10130W_A | -4.7747  | 0.004274 | 3643935  |
| PAN6        | -4.77965 | 5.54E-08 | 3647684  |
| RFG1        | -4.79205 | 6.15E-12 | 3642570  |
| HIT1        | -4.8008  | 0.000133 | 3637854  |
| C4_03000C_A | -4.80272 | 4.58E-09 | 3637935  |
| PRA1        | -4.81012 | 0.001515 | 3642969  |
| C3_07650C_A | -4.81092 | 4.4E-05  | 3638488  |
| C7_01940C_A | -4.81459 | 7.4E-11  | 3636971  |
| SEN15       | -4.81837 | 0.000123 | 3646411  |
| HMX1        | -4.84589 | 3.1E-07  | 3639294  |
| C3_02900W_A | -4.85544 | 2.62E-05 | 3638337  |
| C1_11080W_A | -4.87754 | 6.18E-11 | 3644416  |
| HBR3        | -4.88015 | 6.75E-08 | 3645652  |
| CR_10280W_A | -4.88435 | 0.000141 | 3638934  |
| C1_11160C_A | -4.88534 | 7.51E-06 | 3644399  |
| C3_03370C_A | -4.8965  | 6.87E-09 | 3638366  |
| YPT53       | -4.89817 | 2.5E-07  | 3642483  |



|             |          |          |          |
|-------------|----------|----------|----------|
| AHR1        | -4.90633 | 8.99E-09 | 3641733  |
| ATG9        | -4.90842 | 5.46E-08 | 3635239  |
| C1_00270W_A | -4.91001 | 3.85E-07 | 3639300  |
| C2_02530W_A | -4.91476 | 0.016749 | 3635819  |
| FMP45       | -4.92605 | 5.94E-08 | 3637004  |
| C4_05900C_A | -4.93165 | 5.12E-13 | 3641796  |
| FEN1        | -4.9368  | 1.8E-07  | 3646829  |
| PUF3        | -4.93694 | 1.04E-09 | 3646950  |
| C6_00380C_A | -4.98372 | 1.69E-07 | 3646085  |
| C2_06570C_A | -4.9909  | 1.65E-11 | 3646561  |
| C1_10950C_A | -4.99379 | 4.83E-08 | 3644428  |
| SMM1        | -4.99744 | 1.63E-07 | 3643778  |
| YHB1        | -5.00854 | 2.56E-07 | 3647353  |
| C2_09570C_A | -5.00884 | 0.000241 | 3643811  |
| C2_08950W_A | -5.00934 | 4.47E-09 | 3645788  |
| CR_10000C_A | -5.01142 | 0.000572 | 3639030  |
| C5_03260C_A | -5.0209  | 3.35E-08 | 3646360  |
| GST2        | -5.03062 | 6.26E-10 | 3637937  |
| SNT1        | -5.03382 | 4.69E-12 | 3642033  |
| DAL8        | -5.03544 | 3.4E-05  | 3635181  |
| C2_08920W_A | -5.05534 | 8.26E-10 | 3645797  |
| CR_03250C_A | -5.06858 | 3.86E-12 | 3645102  |
| POP3        | -5.08685 | 4.93E-06 | 3638993  |
| PFK26       | -5.08712 | 6.96E-13 | 3634912  |
| CR_04920W_A | -5.10275 | 1.48E-10 | 3648207  |
| C3_05800W_A | -5.11022 | 7.07E-08 | 3641754  |
| MDM34       | -5.11808 | 1.37E-11 | 3647517  |
| C2_01660C_A | -5.12348 | 8.01E-07 | 3635742  |
| C1_07530W_A | -5.14731 | 0.001005 | 30515025 |
| C1_04710C_A | -5.15295 | 3.5E-06  | 3644764  |
| GCV2        | -5.16244 | 5.34E-11 | 3646505  |
| ARG8        | -5.17908 | 9.01E-09 | 3641131  |
| CR_03660C_A | -5.18105 | 5.42E-08 | 3643219  |
| SCH9        | -5.2082  | 1.74E-10 | 3637421  |
| C4_02520C_A | -5.23218 | 8.82E-10 | 3637863  |
| KCS1        | -5.24502 | 4.29E-07 | 3648120  |
| CTA8        | -5.25422 | 6.06E-11 | 3634947  |
| C3_03690W_A | -5.27897 | 0.003443 | 3645647  |
| YWP1        | -5.28376 | 8.93E-07 | 3643915  |
| CR_04250W_A | -5.29257 | 0.036435 | 3640990  |
| C4_04560C_A | -5.29883 | 3.93E-12 | 3641105  |
| C6_02790C_A | -5.31603 | 7.7E-11  | 3639245  |
| MDJ1        | -5.33222 | 5.71E-11 | 3646980  |
| STP4        | -5.33663 | 0.000235 | 3637405  |
| CR_09920W_A | -5.35082 | 7.82E-12 | 3639028  |
| C1_10710C_A | -5.36194 | 0.000568 | 3644407  |
| C1_06090C_A | -5.38548 | 1.98E-11 | 3639822  |

|             |          |          |          |
|-------------|----------|----------|----------|
| PTC5        | -5.39576 | 3.53E-12 | 3642072  |
| C4_02690W_A | -5.4247  | 2.75E-08 | 3637861  |
| SFT1        | -5.4594  | 3.04E-05 | 30515372 |
| C3_00120W_A | -5.4607  | 0.01579  | 3640566  |
| CR_04600W_A | -5.50446 | 1.72E-11 | 3640950  |
| C3_02840W_A | -5.50465 | 7.57E-05 | 3638331  |
| MRP17       | -5.50552 | 5.22E-09 | 3641548  |
| ZCF28       | -5.52537 | 8.7E-06  | 3634776  |
| SUR2        | -5.54165 | 6.29E-12 | 3642973  |
| RNR3        | -5.54211 | 3.95E-11 | 3647591  |
| CR_03670W_A | -5.54322 | 0.01872  | 3643220  |
| DHH1        | -5.54861 | 1.67E-09 | 3639490  |
| C5_02680W_A | -5.57642 | 5.88E-11 | 3637774  |
| C6_01590W_A | -5.58157 | 5E-17    | 3641650  |
| C4_06040W_A | -5.59684 | 8.14E-06 | 3646521  |
| ELC1        | -5.60061 | 0.000556 | 3646151  |
| HGT4        | -5.60102 | 5.3E-10  | 3635269  |
| COX19       | -5.61657 | 3.92E-07 | 3636220  |
| C2_02300W_A | -5.63176 | 1.91E-06 | 3635808  |
| C1_01510W_A | -5.64095 | 7.32E-06 | 3640229  |
| TPS2        | -5.64123 | 1.73E-10 | 3636892  |
| C7_00340C_A | -5.64301 | 1.75E-14 | 3638040  |
| IFE2        | -5.64965 | 3.15E-10 | 3648027  |
| CR_02100C_A | -5.65445 | 1.22E-06 | 3640141  |
| EPL1        | -5.65668 | 4.85E-16 | 3639732  |
| AAF1        | -5.65936 | 1.17E-12 | 3642284  |
| RAD3        | -5.71151 | 2.4E-15  | 3638014  |
| PRM9        | -5.71287 | 0.013767 | 30515173 |
| SUA71       | -5.72828 | 2.87E-14 | 3636879  |
| DRE2        | -5.73687 | 1.69E-13 | 3642571  |
| MET1        | -5.75743 | 7.07E-12 | 3643014  |
| C2_08030W_A | -5.90943 | 1.47E-07 | 3642309  |
| BRG1        | -5.91035 | 1.36E-08 | 3647664  |
| GRF10       | -5.9169  | 8.45E-14 | 3636492  |
| BUB3        | -5.92733 | 4.5E-12  | 3646362  |
| WHI3        | -5.93257 | 1.47E-11 | 3636991  |
| C1_13130C_A | -5.93294 | 2.48E-11 | 3636202  |
| SLY41       | -5.93544 | 9.09E-14 | 3647139  |
| C4_00260W_A | -5.95312 | 5.8E-10  | 3645037  |
| C1_09790C_A | -5.98622 | 3.15E-12 | 3634843  |
| RPA12       | -5.98865 | 1.88E-06 | 3643477  |
| C2_03570C_A | -5.99096 | 1.18E-05 | 3637336  |
| C3_06560W_A | -5.99676 | 2.41E-14 | 3642276  |
| ATO10       | -5.99815 | 0.001005 | 3640394  |
| RGA2        | -6.01453 | 1.5E-15  | 3635661  |
| CR_03260W_A | -6.02018 | 1.42E-09 | 30515389 |
| C3_05250C_A | -6.0238  | 2.39E-08 | 3635199  |

|             |          |          |          |
|-------------|----------|----------|----------|
| C6_00530C_A | -6.04487 | 4.48E-06 | 30515326 |
| MTM1        | -6.04526 | 9.83E-09 | 3642487  |
| C3_05790C_A | -6.04565 | 6.25E-06 | 3641753  |
| C1_14330W_A | -6.05032 | 1.13E-07 | 3643278  |
| C7_03380W_A | -6.08442 | 9.82E-07 | 30515359 |
| ARG1        | -6.09024 | 1.55E-08 | 3639691  |
| C2_02570W_A | -6.10826 | 6.77E-06 | 3635858  |
| HAP42       | -6.11995 | 2.33E-14 | 3635729  |
| CRP1        | -6.12063 | 4.42E-10 | 3634826  |
| C3_05900W_A | -6.14417 | 4.42E-08 | 3641739  |
| RIM101      | -6.17321 | 5.53E-12 | 3643280  |
| C6_04400W_A | -6.20468 | 0.000338 | 3645949  |
| C3_05750C_A | -6.20721 | 0.001224 | 3641719  |
| NBP35       | -6.21105 | 1.34E-13 | 3647412  |
| TAZ1        | -6.21265 | 7.2E-07  | 3644108  |
| PGA7        | -6.22971 | 1.16E-11 | 3645006  |
| C1_06750W_A | -6.23046 | 0.000121 | 3639506  |
| DED1        | -6.26562 | 5.87E-14 | 3641752  |
| C1_07790C_A | -6.31791 | 1.57E-07 | 3640706  |
| AUT7        | -6.32421 | 1.78E-10 | 30514999 |
| C5_01730W_A | -6.33044 | 1.9E-05  | 3643730  |
| TYE7        | -6.33373 | 6.17E-12 | 3636203  |
| C7_01690W_A | -6.35742 | 6.94E-09 | 3636980  |
| C2_05810W_A | -6.36764 | 1.43E-13 | 3647481  |
| C1_13010W_A | -6.38454 | 7.26E-10 | 3636120  |
| MIT1        | -6.38462 | 6.81E-16 | 3644089  |
| C1_05330C_A | -6.45866 | 2.66E-12 | 3642485  |
| C1_04590W_A | -6.50992 | 2.05E-10 | 30514987 |
| C2_00760C_A | -6.55805 | 9.78E-09 | 3638910  |
| C2_09880C_A | -6.56095 | 6.76E-14 | 3643779  |
| C3_01110C_A | -6.56934 | 0.008117 | 3639835  |
| CR_09930W_A | -6.58791 | 9.83E-12 | 3639029  |
| C2_05640W_A | -6.65088 | 4.22E-15 | 3645566  |
| STE11       | -6.65166 | 1.37E-17 | 3637369  |
| CR_08650C_A | -6.75275 | 1.86E-16 | 3642124  |
| C1_08890C_A | -6.75402 | 0.001967 | 3634924  |
| C1_09320C_A | -6.78056 | 1.76E-22 | 3634834  |
| C5_03210C_A | -6.82004 | 0.005964 | 3646364  |
| C4_00810C_A | -6.83886 | 9.9E-07  | 3645742  |
| C1_09650W_A | -6.86893 | 6.25E-16 | 3634870  |
| C3_02980C_A | -6.88343 | 7.54E-07 | 3638386  |
| CR_00310C_A | -6.95541 | 8.43E-15 | 3639715  |
| STB3        | -6.95912 | 5.64E-14 | 3645781  |
| CPA1        | -6.96776 | 2.18E-11 | 3635715  |
| UTP22       | -7.01704 | 1.44E-08 | 3635760  |
| C3_06940W_A | -7.04491 | 1.25E-20 | 3638509  |
| C2_08530C_A | -7.10194 | 0.000299 | 3643921  |

|             |          |          |          |
|-------------|----------|----------|----------|
| C1_05160C_A | -7.14117 | 2.18E-15 | 3642468  |
| C1_05690C_A | -7.1462  | 0.043838 | 3639896  |
| QDR3        | -7.14642 | 5.95E-10 | 3644023  |
| C4_07020C_A | -7.14671 | 0.043891 | 3642965  |
| DLH1        | -7.14671 | 0.044338 | 3647605  |
| C1_13820C_A | -7.1643  | 3.47E-07 | 3636127  |
| PHR3        | -7.16518 | 9.48E-17 | 3645003  |
| C7_01910C_A | -7.17373 | 4.07E-11 | 3637029  |
| MFG1        | -7.17601 | 2.54E-15 | 3643884  |
| C1_01610C_A | -7.18085 | 7.32E-08 | 3640225  |
| C2_02390W_A | -7.18977 | 5.2E-13  | 3635829  |
| ATG1        | -7.25146 | 2.14E-14 | 3641175  |
| ALS6        | -7.27553 | 1.89E-10 | 3642266  |
| WOR2        | -7.29639 | 9.23E-10 | 3635230  |
| C3_00230C_A | -7.29863 | 2.36E-06 | 3640557  |
| C1_08610C_A | -7.37166 | 1.2E-11  | 3646512  |
| CTR2        | -7.43545 | 2.21E-18 | 3648427  |
| CR_08080W_A | -7.43618 | 0.000205 | 3642094  |
| CR_08580C_A | -7.44234 | 5.64E-08 | 3642105  |
| C4_01960C_A | -7.45723 | 1.46E-15 | 3635664  |
| RPN4        | -7.4797  | 1.88E-16 | 3644684  |
| C3_07570C_A | -7.48263 | 1.32E-10 | 3638522  |
| C6_03200W_A | -7.49436 | 5.25E-14 | 3639177  |
| C3_00620C_A | -7.50139 | 1.39E-10 | 30515171 |
| C6_01780C_A | -7.52558 | 5.56E-12 | 3641636  |
| C7_02660C_A | -7.53996 | 0.000487 | 3647652  |
| GCA2        | -7.59559 | 4.57E-10 | 3647194  |
| HSP78       | -7.61582 | 8.11E-14 | 3637414  |
| C1_04820C_A | -7.62387 | 3.02E-07 | 3644787  |
| C2_08700C_A | -7.65459 | 3.52E-14 | 3643887  |
| C6_03000C_A | -7.67468 | 0.001074 | 3639194  |
| C7_00630C_A | -7.73952 | 4.8E-07  | 3638028  |
| CDR11       | -7.77363 | 5.94E-12 | 3647389  |
| C1_05920W_A | -7.85065 | 0.001561 | 3639864  |
| C4_03230C_A | -7.85181 | 0.001286 | 3637836  |
| PZF1        | -7.8634  | 1.09E-08 | 3648113  |
| C4_07040W_A | -7.87465 | 3.52E-05 | 3642963  |
| C2_01060C_A | -7.88775 | 9.21E-08 | 3638835  |
| FRP1        | -7.90741 | 3.19E-19 | 3645005  |
| TRY4        | -7.93371 | 9.46E-11 | 3635240  |
| CFL2        | -8.09536 | 0.004242 | 3641811  |
| PGA13       | -8.09703 | 0.002229 | 3642138  |
| C7_04160W_A | -8.14315 | 6.21E-08 | 3643127  |
| QDR2        | -8.15455 | 4.27E-15 | 3643661  |
| RSN1        | -8.16723 | 7.16E-17 | 3638308  |
| C4_05160C_A | -8.18446 | 2E-15    | 3647411  |
| CR_04220C_A | -8.22131 | 2.24E-08 | 3640943  |

|             |          |          |          |
|-------------|----------|----------|----------|
| ITR1        | -8.24749 | 4.67E-25 | 3643440  |
| CR_08470W_A | -8.25124 | 3.65E-14 | 3642134  |
| C1_09780C_A | -8.33306 | 7.35E-27 | 3634842  |
| CR_07680C_A | -8.40085 | 1.32E-05 | 3648193  |
| ZCF3        | -8.41123 | 1.17E-15 | 3645335  |
| C6_02950C_A | -8.43375 | 8.45E-10 | 3639188  |
| FGR46       | -8.45983 | 0.004014 | 3638989  |
| C5_05240C_A | -8.46037 | 0.004127 | 3636471  |
| MTLA2       | -8.46082 | 0.006093 | 3643766  |
| CR_01600C_A | -8.46491 | 4.41E-09 | 3640080  |
| SLD1        | -8.69881 | 1.04E-14 | 3638406  |
| C1_11320C_A | -8.73187 | 6.86E-10 | 30515052 |
| CR_08720W_A | -8.73516 | 1.58E-09 | 3642122  |
| RPC10       | -8.79914 | 6.22E-13 | 3643292  |
| C4_06200W_A | -8.87447 | 4.25E-05 | 30515282 |
| OYE23       | -8.95506 | 4.72E-05 | 3641618  |
| CR_08830W_A | -8.98186 | 6.34E-12 | 30515450 |
| C1_10580C_A | -9.05273 | 8.61E-06 | 3647679  |
| C1_08830C_A | -9.05385 | 0.0049   | 3634918  |
| C7_03550C_A | -9.05443 | 0.006432 | 3646235  |
| CR_02910W_A | -9.08548 | 2.13E-15 | 3642586  |
| RCH1        | -9.14498 | 1.2E-15  | 3645002  |
| C1_13250W_A | -9.15371 | 7.33E-19 | 3636143  |
| C1_00090W_A | -9.17941 | 3.2E-06  | 3639304  |
| DEF1        | -9.23254 | 1.59E-14 | 3639023  |
| SPO1        | -9.37225 | 0.000731 | 3647039  |
| C6_01400W_A | -9.37401 | 0.000817 | 3641604  |
| C6_03440W_A | -9.43739 | 4.79E-10 | 3640274  |
| C1_12630C_A | -9.50422 | 3.11E-07 | 3646838  |
| CR_00840C_A | -9.54329 | 0.002603 | 3640411  |
| SSY1        | -9.58861 | 2.51E-17 | 3637382  |
| C3_03250W_A | -9.65418 | 1.1E-20  | 3638318  |
| C5_02640W_A | -9.68207 | 1.77E-13 | 3637785  |
| HEM3        | -9.68335 | 1.94E-18 | 3643940  |
| FYV5        | -9.74975 | 3.6E-08  | 3647057  |
| PTC8        | -9.78163 | 3.13E-20 | 3635674  |
| RIM8        | -9.82622 | 1.84E-18 | 3639342  |
| C4_07140W_A | -9.90598 | 1.47E-20 | 3642936  |
| ARF1        | -9.99222 | 8.66E-23 | 3642130  |
| C5_01900C_A | -10.0431 | 0.001441 | 30515302 |
| C2_02580W_A | -10.044  | 3.2E-15  | 3635860  |
| OPT4        | -10.0534 | 5E-14    | 3647697  |
| C5_02980C_A | -10.1548 | 1.66E-11 | 3637816  |
| ECM22       | -10.1764 | 3.7E-24  | 3648000  |
| C3_05840W_A | -10.1984 | 0.008738 | 3641757  |
| C3_04510W_A | -10.2947 | 4.67E-10 | 3635258  |
| RFX1        | -10.3614 | 5.83E-10 | 3644844  |

|             |          |          |          |
|-------------|----------|----------|----------|
| C2_07280W_A | -10.3997 | 9.32E-05 | 3643475  |
| COX11       | -10.4155 | 1.64E-24 | 3646842  |
| C2_09610W_A | -10.4611 | 1.42E-16 | 3643798  |
| C5_04840C_A | -10.5708 | 8.29E-17 | 3636435  |
| C6_03360C_A | -10.575  | 2.23E-08 | 3639203  |
| FTH1        | -10.6044 | 1.08E-18 | 3634852  |
| C3_00150W_A | -10.6374 | 5.08E-11 | 3640595  |
| HSP31       | -10.6472 | 7.26E-08 | 3644589  |
| FET34       | -10.6475 | 2.32E-19 | 3647131  |
| C1_11510C_A | -10.7982 | 2.07E-15 | 3645336  |
| CUP9        | -10.9531 | 2.41E-15 | 3636950  |
| C4_04520W_A | -10.9694 | 2.46E-14 | 3641110  |
| C2_06520C_A | -11.0728 | 3.23E-07 | 3646571  |
| KAR4        | -11.1158 | 1.27E-08 | 3644937  |
| VTC4        | -11.1411 | 1.46E-34 | 3646795  |
| C3_06950W_A | -11.2351 | 2.33E-16 | 3638507  |
| C6_03180C_A | -11.2543 | 1.15E-29 | 3639261  |
| C4_02770C_A | -11.3088 | 1.1E-10  | 3637903  |
| TPS3        | -11.3138 | 9.39E-23 | 3641205  |
| FRE10       | -11.3214 | 9.66E-22 | 3646841  |
| WSC1        | -11.4837 | 3.95E-19 | 3635138  |
| C4_02740W_A | -12.0617 | 1.09E-23 | 3637855  |
| C2_02190C_A | -12.0801 | 8.61E-18 | 3635753  |
| HGT17       | -12.1264 | 2.56E-05 | 3635687  |
| MRV4        | -12.1281 | 3.05E-05 | 3636547  |
| CTA4        | -12.13   | 1.06E-27 | 3641743  |
| ARR3        | -12.2071 | 2.52E-09 | 3642910  |
| C1_06350W_A | -12.2162 | 1.07E-23 | 3639562  |
| C7_02610C_A | -12.3031 | 8.03E-20 | 3648285  |
| TRY6        | -12.3817 | 1.03E-06 | 3638499  |
| HAK1        | -12.3849 | 9.44E-07 | 3639546  |
| SEN2        | -12.472  | 1.91E-14 | 3637832  |
| C1_09820C_A | -12.4964 | 2.37E-05 | 3634846  |
| C2_07070W_A | -12.5653 | 6.73E-18 | 3643501  |
| C6_01870C_A | -12.5851 | 4.81E-16 | 3641625  |
| COX17       | -12.6806 | 1.4E-08  | 30515088 |
| C5_01020C_A | -13.225  | 0.000827 | 30515297 |
| C2_08350C_A | -13.3179 | 0.023044 | 3640769  |
| C2_10000C_A | -13.3179 | 0.02283  | 30515163 |
| C3_04450C_A | -13.3187 | 0.022825 | 3635207  |
| SSU81       | -13.3554 | 2.84E-17 | 3634944  |
| ELA1        | -13.9595 | 1.83E-12 | 3644680  |
| C1_01130W_A | -13.9842 | 3.49E-27 | 3640178  |
| C2_08580W_A | -14.1126 | 5.97E-07 | 3643916  |
| C4_01240C_A | -14.4275 | 7.99E-18 | 3635705  |
| C4_04300C_A | -14.509  | 3.38E-10 | 3646843  |
| FAR1        | -14.5391 | 2.4E-11  | 3637970  |

|             |          |          |         |
|-------------|----------|----------|---------|
| C5_01990W_A | -14.5542 | 0.000252 | 3643774 |
| C2_04670W_A | -14.5606 | 5.37E-13 | 3647789 |
| PGA48       | -14.6278 | 2.54E-25 | 3647905 |
| C5_04850W_A | -14.8072 | 1.81E-07 | 3636436 |
| C4_05350W_A | -15.0473 | 2.56E-30 | 3646948 |
| FTR1        | -15.5486 | 1.03E-24 | 3643318 |
| C1_07650W_A | -15.7604 | 4.85E-12 | 3646657 |
| GAC1        | -15.8388 | 5.33E-26 | 3638025 |
| ZCF2        | -16.1431 | 8.98E-24 | 3642484 |
| C3_01540W_A | -16.4187 | 2.86E-08 | 3636567 |
| C2_06530W_A | -16.5948 | 3E-10    | 3646572 |
| CR_01510C_A | -17.3958 | 0.000137 | 3640104 |
| PGA37       | -18.0574 | 3.49E-12 | 3636484 |
| C1_09210C_A | -18.486  | 1.23E-40 | 3634897 |
| GIT1        | -19.0061 | 0.007193 | 3646562 |
| C3_00590W_A | -19.3163 | 0.011395 | 6335207 |
| C1_05440C_A | -19.7732 | 4.15E-22 | 3642489 |
| C5_03080C_A | -19.8345 | 2.08E-30 | 3637701 |
| C7_03560W_A | -20.0478 | 5.28E-17 | 3646236 |
| C7_00880C_A | -20.2943 | 1.46E-26 | 3638052 |
| FRE9        | -20.5985 | 4.91E-31 | 3643452 |
| C6_03810W_A | -20.6664 | 5.84E-35 | 3640286 |
| C7_02600C_A | -20.9744 | 9.75E-28 | 3648286 |
| WOR3        | -21.1252 | 2.25E-13 | 3641009 |
| CLG1        | -21.3623 | 2.33E-46 | 3646030 |
| C4_01220C_A | -21.4702 | 9.83E-09 | 3635650 |
| C6_04420W_A | -22.1141 | 6.55E-14 | 3645951 |
| SUT1        | -22.3533 | 3.65E-33 | 3637706 |
| C3_06660C_A | -22.4047 | 0.000204 | 3642253 |
| C7_01430C_A | -22.481  | 7.88E-18 | 3636961 |
| IFA14       | -22.5334 | 6.68E-11 | 3639012 |
| FGR47       | -23.1897 | 4.39E-34 | 3641651 |
| ALS7        | -23.3069 | 6.05E-37 | 3642234 |
| PGA57       | -23.4119 | 5.68E-08 | 3635608 |
| PRX1        | -23.4625 | 5.52E-37 | 3641357 |
| C2_05330C_A | -24.1733 | 1.96E-27 | 3643426 |
| LIP1        | -24.2996 | 4.78E-07 | 3634888 |
| FGR42       | -24.692  | 0.002396 | 3647438 |
| C6_03280W_A | -24.6922 | 0.002435 | 3639185 |
| C5_04030W_A | -26.3099 | 4.69E-34 | 3647737 |
| BMT1        | -26.4009 | 1.68E-32 | 3638535 |
| ARG11       | -27.4639 | 7.09E-08 | 3635193 |
| CR_08880C_A | -28.6962 | 1.79E-19 | 3641878 |
| UGA6        | -29.9059 | 5.75E-07 | 3642975 |
| C1_01620C_A | -30.0636 | 6.55E-35 | 3640193 |
| ZCF1        | -30.2303 | 9.59E-36 | 3638329 |
| PUT1        | -30.3718 | 1.27E-35 | 3637779 |

|             |          |          |          |
|-------------|----------|----------|----------|
| C1_00190C_A | -30.8314 | 6.55E-36 | 3639337  |
| KSP1        | -31.3795 | 3.56E-45 | 3644467  |
| GIT3        | -34.1502 | 2.85E-45 | 3642634  |
| HSP21       | -36.4567 | 9.27E-29 | 3637364  |
| RME1        | -36.806  | 5.7E-41  | 3644453  |
| C1_09770W_A | -37.666  | 8.09E-24 | 3634825  |
| C6_00810C_A | -40.6757 | 2.5E-29  | 3647068  |
| CR_06140W_A | -41.4117 | 1.18E-32 | 3644862  |
| CDA2        | -44.5016 | 5.93E-09 | 3639716  |
| C1_06430C_A | -47.4333 | 0.000274 | 3639553  |
| C1_02690C_A | -47.6452 | 0.000348 | 3636823  |
| CR_04940W_A | -47.6739 | 1.27E-12 | 3648209  |
| C3_03460C_A | -55.3378 | 6.55E-14 | 3638359  |
| C4_03340C_A | -55.9612 | 2.34E-11 | 3648090  |
| HWP2        | -68.7656 | 7.89E-05 | 3646803  |
| C2_08260W_A | -69.5115 | 1.9E-10  | 3642345  |
| SSU1        | -75.1902 | 4.98E-55 | 3641882  |
| C5_04380C_A | -80.3798 | 9.51E-09 | 3636485  |
| C2_02130C_A | -80.8713 | 3.9E-17  | 3635747  |
| C7_01680C_A | -82.3703 | 8.21E-55 | 3636981  |
| C1_11410C_A | -92.9351 | 6.91E-06 | 30515054 |
| PHO87       | -101.876 | 6.82E-16 | 3639861  |
| CFL4        | -110.874 | 1.04E-09 | 3642639  |
| HSP30       | -133.299 | 8.39E-34 | 3645419  |
| C2_04090W_A | -175.745 | 0.047536 | 3637380  |
| C1_06620C_A | -181.056 | 0.042471 | 3639545  |
| C3_04870W_A | -181.056 | 0.042535 | 3635226  |
| C5_00810C_A | -181.056 | 0.042535 | 3644127  |
| CR_07540C_A | -181.056 | 0.042535 | 3648001  |
| C1_07040C_A | -181.067 | 0.043619 | 3639533  |
| MNN1        | -200.045 | 1.02E-21 | 3637784  |
| CR_01530C_A | -214.7   | 3.28E-13 | 3640072  |
| C2_09330C_A | -222.761 | 0.034696 | 3644106  |
| C7_00770W_A | -225.442 | 3.28E-23 | 3637959  |
| C3_07910W_A | -233.322 | 0.037145 | 3647449  |
| CRZ2        | -251.913 | 8.85E-83 | 3645725  |
| C3_07930C_A | -278.198 | 0.031524 | 3647452  |
| C4_07260W_A | -280.664 | 8.97E-09 | 3642942  |
| GPI1        | -285.772 | 3.82E-28 | 3643680  |
| CR_03320C_A | -322.997 | 0.027477 | 3645096  |
| C2_02640C_A | -598.085 | 0.012099 | 30515095 |
| C4_06910W_A | -766.138 | 6.97E-12 | 3642933  |
| C3_06170C_A | -848.358 | 0.008112 | 3642272  |
| C1_14630C_A | -30088.4 | 5.05E-05 | 3643291  |
| TAR1        | -102569  | 0        | 30515449 |

**B120 vs Control**



| Name        | Fold<br>change | P-value | GeneID   |
|-------------|----------------|---------|----------|
| ASG7        | #N/A           | #N/A    | 3639173  |
| ATO7        | #N/A           | #N/A    | 3635814  |
| BUD20       | #N/A           | #N/A    | 3645800  |
| C1_00020C_A | #N/A           | #N/A    | 3639374  |
| C1_01720C_A | #N/A           | #N/A    | 30514964 |
| C1_01970W_A | #N/A           | #N/A    | 30514967 |
| C1_03580W_A | #N/A           | #N/A    | 30514980 |
| C1_03880C_A | #N/A           | #N/A    | 3646409  |
| C1_04440W_A | #N/A           | #N/A    | 3646138  |
| C1_05550C_A | #N/A           | #N/A    | 30514994 |
| C1_05730W_A | #N/A           | #N/A    | 30515001 |
| C1_05890W_A | #N/A           | #N/A    | 3639876  |
| C1_06300W_A | #N/A           | #N/A    | 30515004 |
| C1_06310W_A | #N/A           | #N/A    | 30515005 |
| C1_06490C_A | #N/A           | #N/A    | 30515009 |
| C1_06830W_A | #N/A           | #N/A    | 30515011 |
| C1_07320W_A | #N/A           | #N/A    | 30515023 |
| C1_07450W_A | #N/A           | #N/A    | 30515024 |
| C1_07940W_A | #N/A           | #N/A    | 30515027 |
| C1_08960W_A | #N/A           | #N/A    | 30515032 |
| C1_08970W_A | #N/A           | #N/A    | 30515033 |
| C1_09500W_A | #N/A           | #N/A    | 3634764  |
| C1_09560C_A | #N/A           | #N/A    | 30515034 |
| C1_09700W_A | #N/A           | #N/A    | 3634876  |
| C1_10050W_A | #N/A           | #N/A    | 3634811  |
| C1_10130W_A | #N/A           | #N/A    | 30515040 |
| C1_10590W_A | #N/A           | #N/A    | 30515042 |
| C1_11180C_A | #N/A           | #N/A    | 30515050 |
| C1_11710C_A | #N/A           | #N/A    | 3645320  |
| C1_11780W_A | #N/A           | #N/A    | 30515057 |
| C1_12040W_A | #N/A           | #N/A    | 3642029  |
| C1_12940C_A | #N/A           | #N/A    | 30515067 |
| C1_12980W_A | #N/A           | #N/A    | 30515068 |
| C1_12990W_A | #N/A           | #N/A    | 30515069 |
| C1_13000W_A | #N/A           | #N/A    | 30515070 |
| C1_13040C_A | #N/A           | #N/A    | 30515071 |
| C1_13500C_A | #N/A           | #N/A    | 30515075 |
| C2_00310W_A | #N/A           | #N/A    | 3638800  |
| C2_00560W_A | #N/A           | #N/A    | 3638854  |
| C2_00900W_A | #N/A           | #N/A    | 3638895  |
| C2_01460C_A | #N/A           | #N/A    | 3635844  |
| C2_02080W_A | #N/A           | #N/A    | 30515093 |
| C2_02140C_A | #N/A           | #N/A    | 3635748  |
| C2_03580W_A | #N/A           | #N/A    | 30515100 |
| C2_03630W_A | #N/A           | #N/A    | 3637438  |

|             |      |      |          |
|-------------|------|------|----------|
| C2_04070C_A | #N/A | #N/A | 30515110 |
| C2_04610C_A | #N/A | #N/A | 30515113 |
| C2_05310C_A | #N/A | #N/A | 30515119 |
| C2_05420C_A | #N/A | #N/A | 30515121 |
| C2_05600W_A | #N/A | #N/A | 30515124 |
| C2_05880W_A | #N/A | #N/A | 30515129 |
| C2_06400C_A | #N/A | #N/A | 30515135 |
| C2_06410W_A | #N/A | #N/A | 30515136 |
| C2_06560W_A | #N/A | #N/A | 30515139 |
| C2_06980W_A | #N/A | #N/A | 3643530  |
| C2_07710W_A | #N/A | #N/A | 3642305  |
| C2_08150W_A | #N/A | #N/A | 3642328  |
| C2_08520C_A | #N/A | #N/A | 30515155 |
| C2_09110C_A | #N/A | #N/A | 3644114  |
| C2_09340W_A | #N/A | #N/A | 3644107  |
| C2_09540W_A | #N/A | #N/A | 30515159 |
| C2_09550C_A | #N/A | #N/A | 30515160 |
| C2_09800C_A | #N/A | #N/A | 3643803  |
| C2_10150W_A | #N/A | #N/A | 3643933  |
| C2_10800W_A | #N/A | #N/A | 30515169 |
| C3_00140W_A | #N/A | #N/A | 3640596  |
| C3_00680C_A | #N/A | #N/A | 3640537  |
| C3_01050C_A | #N/A | #N/A | 3639831  |
| C3_01740C_A | #N/A | #N/A | 30515178 |
| C3_02880W_A | #N/A | #N/A | 3638335  |
| C3_04150W_A | #N/A | #N/A | 30515202 |
| C3_05660C_A | #N/A | #N/A | 3643656  |
| C3_05820W_A | #N/A | #N/A | 30515212 |
| C3_06390W_A | #N/A | #N/A | 30515216 |
| C4_00990W_A | #N/A | #N/A | 3635609  |
| C4_01570C_A | #N/A | #N/A | 30515236 |
| C4_01580C_A | #N/A | #N/A | 30515237 |
| C4_01590C_A | #N/A | #N/A | 30515238 |
| C4_01600C_A | #N/A | #N/A | 30515239 |
| C4_01610C_A | #N/A | #N/A | 30515240 |
| C4_01620C_A | #N/A | #N/A | 30515241 |
| C4_01630C_A | #N/A | #N/A | 30515242 |
| C4_01640C_A | #N/A | #N/A | 30515243 |
| C4_02650C_A | #N/A | #N/A | 30515249 |
| C4_03480C_A | #N/A | #N/A | 3646815  |
| C4_04040W_A | #N/A | #N/A | 3641213  |
| C4_04400C_A | #N/A | #N/A | 30515268 |
| C4_04490C_A | #N/A | #N/A | 30515269 |
| C4_06180C_A | #N/A | #N/A | 30515281 |
| C4_06520W_A | #N/A | #N/A | 30515284 |
| C4_06630C_A | #N/A | #N/A | 3642812  |
| C5_01030W_A | #N/A | #N/A | 30515298 |

|             |      |      |          |
|-------------|------|------|----------|
| C5_01150C_A | #N/A | #N/A | 30515299 |
| C5_01160C_A | #N/A | #N/A | 30515300 |
| C5_02850W_A | #N/A | #N/A | 30515305 |
| C5_03450W_A | #N/A | #N/A | 30515311 |
| C5_03890C_A | #N/A | #N/A | 30515312 |
| C5_04450C_A | #N/A | #N/A | 30515315 |
| C6_00220C_A | #N/A | #N/A | 30515324 |
| C6_01540C_A | #N/A | #N/A | 30515333 |
| C6_02390W_A | #N/A | #N/A | 30515339 |
| C6_02400W_A | #N/A | #N/A | 30515340 |
| C6_02620C_A | #N/A | #N/A | 3639211  |
| C6_03570W_A | #N/A | #N/A | 3640248  |
| C6_03600C_A | #N/A | #N/A | 3640295  |
| C6_04150W_A | #N/A | #N/A | 30515343 |
| C7_00540W_A | #N/A | #N/A | 30515348 |
| C7_01000C_A | #N/A | #N/A | 3638022  |
| C7_01060W_A | #N/A | #N/A | 3637950  |
| C7_01130C_A | #N/A | #N/A | 3645912  |
| C7_01260W_A | #N/A | #N/A | 30515352 |
| C7_02190W_A | #N/A | #N/A | 30515356 |
| C7_02420C_A | #N/A | #N/A | 3636975  |
| C7_04070C_A | #N/A | #N/A | 3643153  |
| CR_00450C_A | #N/A | #N/A | 30515367 |
| CR_00500C_A | #N/A | #N/A | 30515368 |
| CR_00530W_A | #N/A | #N/A | 3639668  |
| CR_02320W_A | #N/A | #N/A | 30515381 |
| CR_02470W_A | #N/A | #N/A | 30515382 |
| CR_02660C_A | #N/A | #N/A | 30515383 |
| CR_03190C_A | #N/A | #N/A | 30515388 |
| CR_04980C_A | #N/A | #N/A | 3646395  |
| CR_05350W_A | #N/A | #N/A | 30515405 |
| CR_05370W_A | #N/A | #N/A | 30515406 |
| CR_05470C_A | #N/A | #N/A | 30515409 |
| CR_06190C_A | #N/A | #N/A | 30515418 |
| CR_06200C_A | #N/A | #N/A | 30515419 |
| CR_06210C_A | #N/A | #N/A | 30515420 |
| CR_06220C_A | #N/A | #N/A | 30515421 |
| CR_06580W_A | #N/A | #N/A | 3646627  |
| CR_06600C_A | #N/A | #N/A | 30515422 |
| CR_06630W_A | #N/A | #N/A | 30515423 |
| CR_08140W_A | #N/A | #N/A | 30515435 |
| CR_10320W_A | #N/A | #N/A | 3638938  |
| CR_10460W_A | #N/A | #N/A | 30515457 |
| CSA2        | #N/A | #N/A | 3642930  |
| FGR18       | #N/A | #N/A | 3644112  |
| FGR37       | #N/A | #N/A | 3641609  |
| FIG1        | #N/A | #N/A | 3644025  |

|          |      |      |          |
|----------|------|------|----------|
| GTT1     | #N/A | #N/A | 3643653  |
| GTT12    | #N/A | #N/A | 3638304  |
| ITS1     | #N/A | #N/A | 30515447 |
| ITS2     | #N/A | #N/A | 30515448 |
| MFALPHA  | #N/A | #N/A | 3646420  |
| MRV3     | #N/A | #N/A | 3636546  |
| OPT5     | #N/A | #N/A | 3640768  |
| PGA12    | #N/A | #N/A | 3638920  |
| PGA22    | #N/A | #N/A | 3644939  |
| PGA50    | #N/A | #N/A | 3647524  |
| RDN18    | #N/A | #N/A | 3648135  |
| RDN25    | #N/A | #N/A | 3648137  |
| RDN5     | #N/A | #N/A | 3648138  |
| RDN58    | #N/A | #N/A | 3648136  |
| RFC52    | #N/A | #N/A | 30514953 |
| RHD2     | #N/A | #N/A | 3637891  |
| RPR1     | #N/A | #N/A | 30515150 |
| SCR1     | #N/A | #N/A | 30515392 |
| SNR52    | #N/A | #N/A | 30515222 |
| SNR6     | #N/A | #N/A | 30515211 |
| SPR3     | #N/A | #N/A | 3635853  |
| tA(AGC)1 | #N/A | #N/A | 30515148 |
| tA(AGC)2 | #N/A | #N/A | 30515199 |
| tA(AGC)3 | #N/A | #N/A | 30514965 |
| tA(AGC)4 | #N/A | #N/A | 30514960 |
| tA(AGC)5 | #N/A | #N/A | 30515321 |
| tA(AGC)7 | #N/A | #N/A | 30515078 |
| tA(UGC)1 | #N/A | #N/A | 30515336 |
| tA(UGC)2 | #N/A | #N/A | 30515342 |
| tC(GCA)1 | #N/A | #N/A | 30515411 |
| tC(GCA)2 | #N/A | #N/A | 30515410 |
| tD(GUC)2 | #N/A | #N/A | 30515261 |
| tD(GUC)3 | #N/A | #N/A | 30515260 |
| tD(GUC)4 | #N/A | #N/A | 30515259 |
| tD(GUC)5 | #N/A | #N/A | 30515114 |
| tD(GUC)6 | #N/A | #N/A | 30515233 |
| tD(GUC)7 | #N/A | #N/A | 30515452 |
| tE(CUC)1 | #N/A | #N/A | 30515101 |
| tE(UUC)1 | #N/A | #N/A | 30515196 |
| tE(UUC)2 | #N/A | #N/A | 30515184 |
| tE(UUC)3 | #N/A | #N/A | 30515295 |
| tE(UUC)4 | #N/A | #N/A | 30515294 |
| tE(UUC)5 | #N/A | #N/A | 30515309 |
| tE(UUC)6 | #N/A | #N/A | 30515198 |
| tE(UUC)7 | #N/A | #N/A | 30515445 |
| tF(GAA)1 | #N/A | #N/A | 30515191 |
| tF(GAA)2 | #N/A | #N/A | 30515103 |

|          |      |      |          |
|----------|------|------|----------|
| tF(GAA)3 | #N/A | #N/A | 30515107 |
| tF(GAA)4 | #N/A | #N/A | 30515166 |
| tF(GAA)5 | #N/A | #N/A | 30515224 |
| tG(CCC)1 | #N/A | #N/A | 30515228 |
| tG(GCC)1 | #N/A | #N/A | 30515432 |
| tG(GCC)2 | #N/A | #N/A | 30515258 |
| tG(GCC)3 | #N/A | #N/A | 30515115 |
| tG(GCC)4 | #N/A | #N/A | 30515231 |
| tG(GCC)5 | #N/A | #N/A | 30515230 |
| tG(GCC)6 | #N/A | #N/A | 30515446 |
| tG(UCC)1 | #N/A | #N/A | 30515172 |
| tG(UCC)2 | #N/A | #N/A | 30515229 |
| tH(GUG)1 | #N/A | #N/A | 30515401 |
| tH(GUG)3 | #N/A | #N/A | 30515217 |
| tI(AAU)1 | #N/A | #N/A | 30515138 |
| tI(AAU)2 | #N/A | #N/A | 30515147 |
| tI(AAU)3 | #N/A | #N/A | 30515122 |
| tI(AAU)4 | #N/A | #N/A | 30515272 |
| tI(AAU)5 | #N/A | #N/A | 30515440 |
| tI(UAU)1 | #N/A | #N/A | 30515045 |
| tK(CUU)1 | #N/A | #N/A | 30515193 |
| tK(CUU)2 | #N/A | #N/A | 30515206 |
| tK(UUU)1 | #N/A | #N/A | 30515181 |
| tK(UUU)2 | #N/A | #N/A | 30515428 |
| tK(UUU)3 | #N/A | #N/A | 30515436 |
| tK(UUU)4 | #N/A | #N/A | 30515437 |
| tK(UUU)5 | #N/A | #N/A | 30515438 |
| tL(AAG)1 | #N/A | #N/A | 30515379 |
| tL(AAG)2 | #N/A | #N/A | 30515022 |
| tL(CAA)1 | #N/A | #N/A | 30515091 |
| tL(CAA)2 | #N/A | #N/A | 30515087 |
| tL(CAA)3 | #N/A | #N/A | 30515346 |
| tL(CAA)4 | #N/A | #N/A | 30515444 |
| tL(CAA)5 | #N/A | #N/A | 30515322 |
| tL(CAA)6 | #N/A | #N/A | 30515362 |
| tL(UAA)1 | #N/A | #N/A | 30515089 |
| tL(UAA)2 | #N/A | #N/A | 30515375 |
| tL(UAA)3 | #N/A | #N/A | 30514979 |
| tL(UAA)4 | #N/A | #N/A | 30515017 |
| tL(UAA)5 | #N/A | #N/A | 30515360 |
| tM(CAU)1 | #N/A | #N/A | 30515188 |
| tM(CAU)2 | #N/A | #N/A | 30515145 |
| tM(CAU)3 | #N/A | #N/A | 30515132 |
| tM(CAU)4 | #N/A | #N/A | 30515451 |
| tN(GUU)1 | #N/A | #N/A | 30514997 |
| tN(GUU)2 | #N/A | #N/A | 30514996 |
| tN(GUU)3 | #N/A | #N/A | 30514978 |

|          |      |      |          |
|----------|------|------|----------|
| tN(GUU)4 | #N/A | #N/A | 30515455 |
| tP(AGG)1 | #N/A | #N/A | 30515016 |
| tP(UGG)1 | #N/A | #N/A | 30514992 |
| tP(UGG)2 | #N/A | #N/A | 30515157 |
| tP(UGG)3 | #N/A | #N/A | 30514956 |
| tP(UGG)4 | #N/A | #N/A | 30515413 |
| tP(UGG)5 | #N/A | #N/A | 30515412 |
| tQ(CUG)1 | #N/A | #N/A | 30515296 |
| tQ(UUG)1 | #N/A | #N/A | 30515257 |
| tQ(UUG)3 | #N/A | #N/A | 30515118 |
| tQ(UUG)4 | #N/A | #N/A | 30515271 |
| tQ(UUG)5 | #N/A | #N/A | 30515270 |
| tR(ACG)1 | #N/A | #N/A | 30515408 |
| tR(ACG)2 | #N/A | #N/A | 30515407 |
| tR(CCG)1 | #N/A | #N/A | 30514970 |
| tR(CCU)1 | #N/A | #N/A | 30515177 |
| tR(UCU)1 | #N/A | #N/A | 30515192 |
| tR(UCU)2 | #N/A | #N/A | 30515102 |
| tR(UCU)3 | #N/A | #N/A | 30515106 |
| tR(UCU)4 | #N/A | #N/A | 30514971 |
| tR(UCU)5 | #N/A | #N/A | 30515223 |
| tS(AGA)1 | #N/A | #N/A | 30515416 |
| tS(AGA)2 | #N/A | #N/A | 30515425 |
| tS(AGA)3 | #N/A | #N/A | 30515415 |
| tS(AGA)4 | #N/A | #N/A | 30515126 |
| tS(CAG)1 | #N/A | #N/A | 30515292 |
| tS(CGA)1 | #N/A | #N/A | 30515036 |
| tS(GCU)1 | #N/A | #N/A | 30515398 |
| tS(GCU)2 | #N/A | #N/A | 30515397 |
| tS(UGA)1 | #N/A | #N/A | 30514963 |
| tS(UGA)2 | #N/A | #N/A | 30515279 |
| tS(UGA)3 | #N/A | #N/A | 30515235 |
| tT(AGU)1 | #N/A | #N/A | 30514998 |
| tT(AGU)3 | #N/A | #N/A | 30515369 |
| tT(AGU)4 | #N/A | #N/A | 30515116 |
| tT(AGU)6 | #N/A | #N/A | 30514952 |
| tT(CGU)1 | #N/A | #N/A | 30514983 |
| tT(UGU)1 | #N/A | #N/A | 30515252 |
| tT(UGU)2 | #N/A | #N/A | 30515278 |
| tV(AAC)1 | #N/A | #N/A | 30515094 |
| tV(AAC)2 | #N/A | #N/A | 30515180 |
| tV(AAC)3 | #N/A | #N/A | 30515380 |
| tV(AAC)4 | #N/A | #N/A | 30515414 |
| tV(AAC)5 | #N/A | #N/A | 30515209 |
| tV(AAC)6 | #N/A | #N/A | 30515210 |
| tV(CAC)1 | #N/A | #N/A | 30515081 |
| tV(UAC)1 | #N/A | #N/A | 30515165 |

|             |          |          |          |
|-------------|----------|----------|----------|
| tW(CCA)1    | #N/A     | #N/A     | 30515064 |
| tW(CCA)2    | #N/A     | #N/A     | 30515220 |
| tY(GUA)1    | #N/A     | #N/A     | 30515058 |
| tY(GUA)2    | #N/A     | #N/A     | 30515183 |
| tY(GUA)3    | #N/A     | #N/A     | 30515221 |
| tY(GUA)4    | #N/A     | #N/A     | 30515059 |
| C1_04180W_A | 1838.009 | 2.44E-05 | 3644716  |
| HHT21       | 687.4192 | 3.45E-13 | 3644707  |
| C4_05390W_A | 365.7476 | 0.000913 | 3646951  |
| HGT12       | 356.9393 | 0.00117  | 3638048  |
| CRH11       | 259.2182 | 9.02E-10 | 3637905  |
| C1_03150C_A | 228.3427 | 0.002216 | 30514976 |
| ALI1        | 211.9259 | 0.002599 | 3636635  |
| CDC11       | 202.9542 | 0.002835 | 3647888  |
| C2_09590C_A | 183.3749 | 0.003417 | 3643800  |
| VMA10       | 168.7248 | 0.003997 | 3645215  |
| HRT2        | 156.5937 | 1.55E-08 | 3635709  |
| C3_07840C_A | 154.6042 | 0.004735 | 3647465  |
| SAM51       | 153.5386 | 0.004687 | 3641582  |
| COG4        | 152.0432 | 0.004734 | 3645571  |
| TNA1        | 145.2899 | 0.006371 | 3637827  |
| C3_02620C_A | 141.9118 | 0.005387 | 3638326  |
| HHT2        | 141.278  | 7.51E-21 | 3647326  |
| C1_11990W_A | 136.0189 | 0.005713 | 3642042  |
| HTA2        | 122.987  | 6.43E-20 | 3644715  |
| C6_02140W_A | 112.1675 | 0.007998 | 3645886  |
| FGR41       | 109.0029 | 1.56E-07 | 3634839  |
| PXP2        | 103.623  | 0.010247 | 3636558  |
| SOU1        | 96.51473 | 2.85E-11 | 3642799  |
| HOM6        | 96.06665 | 3.39E-07 | 3636815  |
| C6_00710W_A | 91.24766 | 0.011193 | 3647073  |
| PGA38       | 91.10256 | 2.25E-13 | 3637846  |
| C5_03000C_A | 89.18306 | 0.011658 | 3637818  |
| MLC1        | 86.9366  | 0.01214  | 30515387 |
| C1_13100W_A | 86.61008 | 0.013682 | 30515073 |
| ECM331      | 81.09085 | 0.013749 | 3637731  |
| CDC10       | 80.54509 | 7.4E-07  | 3640947  |
| ERG28       | 77.18923 | 0.014466 | 3638833  |
| LSC1        | 76.38602 | 1.03E-24 | 3640199  |
| FGR6-10     | 76.35584 | 0.014889 | 3641770  |
| CR_06380C_A | 74.58674 | 0.015345 | 3648139  |
| CR_05310W_A | 74.22469 | 0.01543  | 3648125  |
| C6_02180W_A | 74.17393 | 0.015405 | 3645861  |
| GUP1        | 73.3657  | 0.015691 | 3636171  |
| DPM2        | 70.25507 | 0.016958 | 30515325 |
| CR_10130W_A | 68.25876 | 0.017607 | 3638970  |
| C3_02140C_A | 64.07053 | 9.18E-13 | 3636656  |

|             |          |          |          |
|-------------|----------|----------|----------|
| C3_06750W_A | 61.07263 | 0.020849 | 30515219 |
| CR_00280C_A | 59.80364 | 0.021404 | 3639719  |
| HHO1        | 59.61921 | 2.53E-12 | 30515358 |
| C6_00660C_A | 58.96976 | 0.021812 | 3647133  |
| C2_02330W_A | 58.96065 | 0.021778 | 3635811  |
| CR_05210W_A | 58.11305 | 0.022346 | 3648081  |
| C4_02460W_A | 55.97889 | 0.023544 | 3637844  |
| DPM1        | 55.92615 | 5.24E-06 | 3640700  |
| CR_04490C_A | 55.84606 | 0.024013 | 3641013  |
| TUB4        | 54.69301 | 0.024324 | 3641774  |
| BIO2        | 54.68603 | 6.59E-06 | 3640106  |
| C1_11950W_A | 54.26734 | 0.024617 | 3642045  |
| C3_06730W_A | 53.247   | 0.025616 | 3638504  |
| ERG11       | 52.62181 | 1.7E-16  | 3641571  |
| FAD1        | 52.54865 | 0.026021 | 3634930  |
| C2_10010C_A | 52.14356 | 0.026197 | 3643962  |
| PGA6        | 51.4342  | 9.52E-06 | 3634774  |
| ILV5        | 51.0439  | 1.68E-28 | 3644012  |
| HHF1        | 50.64913 | 1.77E-25 | 3644705  |
| C1_10560C_A | 50.44964 | 0.027769 | 3647196  |
| C6_00400C_A | 50.05936 | 0.028112 | 3646087  |
| CHT3        | 49.59319 | 1.64E-12 | 3638967  |
| C7_00240W_A | 48.81486 | 0.030285 | 3637980  |
| POL30       | 46.53292 | 2.46E-05 | 3635583  |
| C2_09960W_A | 45.80774 | 0.031869 | 3643821  |
| C7_03650W_A | 45.79697 | 0.03188  | 3646224  |
| C3_07540C_A | 45.52861 | 0.032421 | 3638526  |
| TUB2        | 45.23504 | 4.47E-11 | 3639329  |
| C3_01100W_A | 43.70186 | 0.033806 | 3639834  |
| C2_05720C_A | 42.18395 | 6.34E-11 | 3645574  |
| ARC18       | 41.13062 | 0.037203 | 3644056  |
| ACP12       | 40.92523 | 3.17E-05 | 3637361  |
| SOL3        | 40.84536 | 8.92E-11 | 3646625  |
| IFE1        | 40.53337 | 0.038312 | 3644778  |
| C1_07920W_A | 40.28704 | 0.038256 | 30515026 |
| C7_01750W_A | 40.18398 | 0.03912  | 3637009  |
| CCN1        | 40.05794 | 0.038887 | 3643735  |
| RBE1        | 39.93976 | 0.039342 | 3643317  |
| CWH43       | 39.35949 | 2.27E-10 | 3640389  |
| RFA2        | 39.04335 | 5.05E-05 | 3643506  |
| C1_06700W_A | 38.29284 | 4.22E-05 | 3639511  |
| C1_02100W_A | 38.06428 | 0.04152  | 3644578  |
| HHF22       | 37.97656 | 6.84E-26 | 3647327  |
| SNZ1        | 37.85121 | 4.79E-10 | 3636803  |
| C1_03600W_A | 37.26534 | 4.86E-05 | 3636880  |
| C2_05510C_A | 37.23845 | 0.042502 | 3643420  |
| AGM1        | 37.1082  | 5.15E-05 | 3636138  |



|             |          |          |          |
|-------------|----------|----------|----------|
| C4_02600C_A | 36.92031 | 0.042839 | 3637912  |
| C7_01100C_A | 36.8408  | 0.043711 | 3637948  |
| LEU2        | 36.69563 | 7.47E-09 | 3638034  |
| OST1        | 36.59624 | 5.41E-05 | 3643657  |
| THR1        | 35.67744 | 6.16E-05 | 3641572  |
| C1_03940W_A | 35.65093 | 2.04E-07 | 3646415  |
| CWH8        | 35.22868 | 0.045807 | 3644598  |
| PHA2        | 35.21192 | 0.045825 | 3638346  |
| YNK1        | 34.72237 | 4.59E-15 | 3637746  |
| PMI1        | 34.70729 | 1.87E-07 | 3643795  |
| C1_09060C_A | 34.30913 | 7.31E-05 | 3634772  |
| C1_07490C_A | 33.6558  | 0.049359 | 3646666  |
| ATP18       | 33.52918 | 8.07E-05 | 30515084 |
| C1_06050C_A | 33.36543 | 8.24E-05 | 30515003 |
| PGA45       | 33.15621 | 0.000108 | 3639875  |
| PHO15       | 32.46646 | 1.2E-13  | 3644459  |
| ERG6        | 32.4299  | 7.49E-12 | 3636655  |
| CYT1        | 31.6298  | 3.65E-19 | 3643441  |
| ATP19       | 30.76045 | 0.000116 | 30515061 |
| CR_03000C_A | 30.26503 | 0.000118 | 3642597  |
| HTA1        | 29.87498 | 1.59E-20 | 3645658  |
| ATP1        | 29.82967 | 1.37E-45 | 3646134  |
| SHE3        | 29.64287 | 0.000137 | 3639277  |
| CR_03470W_A | 29.29306 | 0.000147 | 3643198  |
| ERG26       | 29.26096 | 4.01E-09 | 3642803  |
| CDC28       | 27.41372 | 0.000193 | 3644838  |
| QCR2        | 26.23998 | 7.16E-19 | 3646352  |
| C2_07140W_A | 26.09914 | 8.14E-14 | 3643508  |
| ERV46       | 25.96754 | 2.37E-06 | 3644129  |
| CR_09330C_A | 25.89895 | 1.55E-17 | 3641899  |
| C2_02050C_A | 25.54991 | 2.81E-06 | 3635851  |
| TAL1        | 25.53146 | 9.72E-37 | 3643225  |
| TUB1        | 25.37593 | 3.83E-15 | 3641930  |
| C5_02380W_A | 25.36484 | 2.31E-44 | 3637794  |
| PHR1        | 25.07557 | 1.35E-35 | 3641108  |
| GND1        | 24.47076 | 4.8E-38  | 3636131  |
| C1_14320C_A | 24.32981 | 0.00038  | 3643316  |
| PDI1        | 24.24315 | 1.29E-21 | 3641367  |
| C5_02920W_A | 23.93852 | 0.000369 | 3637751  |
| HAT1        | 23.58362 | 3.39E-06 | 3644770  |
| SEC21       | 23.10166 | 1.57E-15 | 3644786  |
| C2_07540W_A | 22.78709 | 0.000503 | 3645222  |
| C4_03170W_A | 22.73576 | 0.083578 | 3637840  |
| LSC2        | 22.22575 | 1.28E-28 | 3646618  |
| CR_06170W_A | 22.10278 | 0.000519 | 3644865  |
| CR_03330W_A | 21.97744 | 0.000537 | 3645095  |
| C1_02760W_A | 21.9228  | 1.71E-09 | 3636870  |

|             |          |          |          |
|-------------|----------|----------|----------|
| CR_05500C_A | 21.86455 | 0.000594 | 3647598  |
| AAP1        | 21.76539 | 6.84E-08 | 3647397  |
| DDR48       | 21.76286 | 1.79E-14 | 3644061  |
| TSA1        | 21.44504 | 1.2E-28  | 3642269  |
| DOG1        | 21.31599 | 0.000602 | 3641597  |
| APE3        | 21.14587 | 8.7E-08  | 3643875  |
| PMM1        | 21.11455 | 3.19E-09 | 3636852  |
| FRP2        | 21.00679 | 3.94E-09 | 3638008  |
| CR_04760C_A | 20.94452 | 8.53E-06 | 3647303  |
| ASH2        | 20.85535 | 0.000689 | 3636445  |
| ERG13       | 20.74262 | 1.4E-15  | 3641881  |
| LAT1        | 20.62469 | 1.14E-27 | 3636986  |
| ZWF1        | 20.36406 | 9.16E-22 | 3634913  |
| IDP1        | 19.66598 | 2.71E-12 | 3647474  |
| CYB5        | 19.61352 | 1.3E-05  | 3637965  |
| C1_07260C_A | 19.50037 | 0.000858 | 3644456  |
| COX5        | 19.36686 | 1.16E-15 | 3634768  |
| SPE3        | 19.22154 | 4.17E-13 | 3643528  |
| QCR8        | 19.11081 | 4.86E-11 | 30515112 |
| ACS2        | 19.07977 | 8.65E-33 | 3644710  |
| AMO2        | 19.06399 | 3.93E-06 | 3648021  |
| CDC19       | 18.92144 | 2.99E-39 | 3643438  |
| EMP24       | 18.91416 | 1.94E-05 | 3647247  |
| C5_01230C_A | 18.87226 | 4.53E-11 | 3642618  |
| C1_04430C_A | 18.86443 | 0.000939 | 30514986 |
| TSA1B       | 18.80112 | 1.34E-26 | 30515214 |
| PST3        | 18.63648 | 1.48E-20 | 3648031  |
| C2_07650C_A | 18.60677 | 1.73E-05 | 3642342  |
| SSR1        | 18.47764 | 5.76E-13 | 3638055  |
| C2_03970W_A | 18.38394 | 0.001036 | 3637419  |
| LEU1        | 18.31934 | 1.04E-24 | 3639685  |
| CR_03520C_A | 18.25413 | 7.96E-11 | 3643203  |
| ATP3        | 18.21657 | 1.05E-21 | 3640387  |
| PMT2        | 18.20375 | 1.46E-15 | 3638538  |
| C2_03020C_A | 18.17033 | 2.11E-21 | 3643019  |
| CBR1        | 17.99706 | 5.6E-10  | 3646961  |
| RPS17B      | 17.93804 | 4.12E-21 | 30515044 |
| C6_02190C_A | 17.89396 | 2.18E-05 | 3645862  |
| EAF6        | 17.75288 | 0.001221 | 3646494  |
| RFC5        | 17.74404 | 0.001254 | 3638890  |
| CDC21       | 17.73972 | 0.001329 | 3643463  |
| CHO1        | 17.6637  | 1.7E-08  | 3644557  |
| C4_00710W_A | 17.56656 | 2.17E-05 | 3645750  |
| C4_01510W_A | 17.55835 | 1.14E-09 | 3635616  |
| CAR1        | 17.53611 | 2.09E-17 | 3636503  |
| ALD5        | 17.32618 | 2.71E-32 | 3643026  |
| CHT2        | 17.3235  | 1.12E-12 | 3636523  |

|             |          |          |          |
|-------------|----------|----------|----------|
| CR_00990W_A | 17.31264 | 0.001407 | 3640425  |
| PHO8        | 17.28495 | 4.98E-05 | 3647179  |
| C4_00390W_A | 17.25032 | 2.93E-05 | 3645016  |
| MDH1-1      | 17.18595 | 3.37E-28 | 3635636  |
| ASK1        | 17.17152 | 0.001671 | 3635656  |
| C1_01190C_A | 17.16693 | 2.61E-05 | 3640207  |
| SCW11       | 17.11685 | 3.36E-15 | 3636521  |
| C6_02560W_A | 16.94474 | 5.28E-11 | 3639205  |
| MIS11       | 16.87701 | 1.78E-21 | 3645732  |
| ERG10       | 16.87007 | 1.93E-19 | 3648275  |
| C2_07010W_A | 16.77273 | 2.9E-11  | 3643535  |
| CAT1        | 16.68428 | 6.41E-27 | 3639495  |
| PLC2        | 16.59256 | 1.16E-06 | 3642985  |
| SEC22       | 16.43395 | 0.00171  | 30515391 |
| EGD2        | 16.41417 | 9.79E-18 | 3635284  |
| RPL24A      | 16.26565 | 2.01E-21 | 3641174  |
| CLB4        | 16.08615 | 5.76E-05 | 3643102  |
| TOS1        | 15.97822 | 2.26E-20 | 3636566  |
| LYS9        | 15.83943 | 7.26E-09 | 3642279  |
| CYP1        | 15.83687 | 6E-23    | 3636978  |
| C2_09040W_A | 15.7738  | 4.45E-09 | 3645792  |
| DOA1        | 15.75416 | 8.22E-14 | 3634871  |
| RAD54       | 15.72087 | 0.002036 | 3636192  |
| OSH3        | 15.66866 | 8.85E-11 | 3645368  |
| C5_02220C_A | 15.40786 | 0.002213 | 3637760  |
| C4_03050C_A | 15.37045 | 7.8E-11  | 3637930  |
| C1_05180C_A | 15.206   | 0.00228  | 30514990 |
| SWI6        | 15.19313 | 0.002268 | 3634932  |
| HGT3        | 15.09436 | 0.002311 | 3643185  |
| C2_09100C_A | 15.04437 | 1.49E-08 | 3644113  |
| RGD1        | 15.0054  | 3.16E-06 | 3639868  |
| C5_04410C_A | 14.96721 | 3.25E-06 | 3636410  |
| C1_09980C_A | 14.93896 | 7.92E-05 | 3634863  |
| ATP2        | 14.84413 | 4.31E-35 | 3645039  |
| ERV25       | 14.76595 | 2.46E-07 | 3642243  |
| HIS1        | 14.71901 | 1.81E-09 | 3636501  |
| CR_03950W_A | 14.71511 | 0.002664 | 3640960  |
| LAP41       | 14.7109  | 1.92E-13 | 3636653  |
| ACO2        | 14.66116 | 5.05E-06 | 3646708  |
| C1_06920C_A | 14.57765 | 0.002669 | 3639525  |
| BGL2        | 14.5723  | 2.01E-19 | 3635691  |
| TRP4        | 14.45655 | 0.000101 | 3642904  |
| SEC23       | 14.41655 | 3.04E-16 | 3641818  |
| COF1        | 14.35135 | 1.35E-15 | 30515293 |
| RET2        | 14.31734 | 5.33E-11 | 3637714  |
| C7_01710W_A | 14.26044 | 3.28E-11 | 3637012  |
| PDX1        | 14.26037 | 2.51E-19 | 3636128  |

|             |          |          |          |
|-------------|----------|----------|----------|
| RBT4        | 14.20971 | 4.46E-09 | 3639534  |
| C2_07550W_A | 14.19059 | 5.64E-13 | 3645221  |
| SGA1        | 14.08709 | 5.16E-07 | 3636652  |
| C1_00700W_A | 14.0716  | 0.00294  | 3639330  |
| VMA2        | 14.01203 | 8.43E-20 | 3646710  |
| NHP6A       | 14.01073 | 5.24E-19 | 30515244 |
| HTA3        | 13.9788  | 6.48E-07 | 3638322  |
| MCR1        | 13.97497 | 1.52E-20 | 3647561  |
| C2_06770W_A | 13.89158 | 0.003171 | 3643515  |
| TRX1        | 13.78433 | 5.19E-16 | 3638950  |
| EGD1        | 13.76647 | 1.04E-16 | 3645340  |
| CR_05360C_A | 13.76533 | 0.00318  | 3648033  |
| OPI3        | 13.76344 | 0.003179 | 3642277  |
| PDB1        | 13.75554 | 1.2E-23  | 3641186  |
| C6_03050C_A | 13.71845 | 0.00013  | 3639270  |
| C2_06890C_A | 13.62791 | 0.000193 | 3643522  |
| KTR4        | 13.61894 | 0.003509 | 3646425  |
| HWP1        | 13.51326 | 0.003815 | 3645372  |
| C1_03240W_A | 13.46082 | 6.81E-06 | 3636895  |
| C2_02410W_A | 13.3515  | 3.58E-11 | 3635755  |
| CWH41       | 13.34932 | 1.95E-08 | 3646533  |
| FAS2        | 13.33568 | 7.28E-33 | 3635222  |
| RPP2A       | 13.286   | 2.07E-13 | 30515439 |
| C6_03130W_A | 13.27253 | 8.84E-06 | 30515341 |
| C2_09050C_A | 13.13027 | 7.86E-07 | 3645791  |
| C6_04100W_A | 13.11986 | 4.87E-11 | 3647836  |
| C2_00590W_A | 13.05847 | 0.000196 | 3638851  |
| C1_10310W_A | 13.04766 | 0.003809 | 3634906  |
| ERG24       | 12.99919 | 3.81E-08 | 3647716  |
| DAP1        | 12.9599  | 9.68E-06 | 3641021  |
| C7_00670C_A | 12.9564  | 3.74E-08 | 3638024  |
| C5_05020C_A | 12.9287  | 8.94E-07 | 3636486  |
| CR_08480C_A | 12.89856 | 7.05E-09 | 30515442 |
| DAG7        | 12.84864 | 8.06E-08 | 3635607  |
| CMP1        | 12.83466 | 4.87E-08 | 3639328  |
| SEC13       | 12.8303  | 2.85E-11 | 3638425  |
| ACT1        | 12.8107  | 5.71E-31 | 3636195  |
| RPS15       | 12.76949 | 4.95E-19 | 3635194  |
| LEU4        | 12.74658 | 3.86E-05 | 3639339  |
| CHS1        | 12.73321 | 7.17E-08 | 3641364  |
| RFA1        | 12.62997 | 1.84E-12 | 3638823  |
| C1_12650C_A | 12.62905 | 0.004468 | 3646836  |
| SRB1        | 12.62123 | 2.91E-24 | 3647454  |
| C4_04600C_A | 12.58514 | 0.00022  | 3641156  |
| HMG1        | 12.56945 | 2.16E-12 | 3644687  |
| ADK1        | 12.55946 | 1.28E-14 | 3644533  |
| C1_09020W_A | 12.38657 | 1.33E-07 | 3634917  |

|             |          |          |          |
|-------------|----------|----------|----------|
| CR_01490C_A | 12.35493 | 1.07E-05 | 30515376 |
| SAC1        | 12.34319 | 1.14E-06 | 3634864  |
| SER33       | 12.31887 | 3.64E-17 | 3642030  |
| CR_08610W_A | 12.27599 | 4.34E-07 | 3642109  |
| ERP5        | 12.25139 | 1.79E-06 | 30515046 |
| C5_00080C_A | 12.15978 | 8.65E-11 | 3647886  |
| ERG2        | 12.15374 | 0.005599 | 3639347  |
| C1_04200C_A | 12.12938 | 1.26E-05 | 3644718  |
| C5_02110W_A | 12.08456 | 4.75E-23 | 3637732  |
| ADE1        | 12.05989 | 3.08E-13 | 3639722  |
| SEC20       | 12.02082 | 0.000282 | 3639206  |
| C1_14060W_A | 11.99738 | 7.47E-16 | 3643344  |
| FRS2        | 11.98153 | 3.46E-16 | 3636824  |
| ARP3        | 11.96765 | 1.37E-14 | 3643479  |
| HSP12       | 11.92655 | 1.7E-22  | 3643745  |
| C3_01070C_A | 11.92014 | 0.005767 | 3639832  |
| RPL8B       | 11.90277 | 1.1E-20  | 3635198  |
| C6_02480W_A | 11.80705 | 4.29E-05 | 3639170  |
| ACO1        | 11.79003 | 1.29E-26 | 3642090  |
| PGA63       | 11.69737 | 9E-19    | 3639524  |
| TEF2        | 11.65805 | 1.79E-31 | 3646502  |
| ARC35       | 11.61564 | 8.49E-09 | 3639823  |
| C4_04970C_A | 11.61297 | 2.83E-05 | 30515274 |
| POL1        | 11.50899 | 9.17E-07 | 3635144  |
| RKI1        | 11.44311 | 0.000417 | 3636574  |
| C1_01080W_A | 11.40988 | 0.006784 | 3640173  |
| IDH1        | 11.36372 | 1.53E-24 | 3634893  |
| C4_01840C_A | 11.34004 | 5.51E-09 | 3635592  |
| SMC1        | 11.30749 | 0.000487 | 3643221  |
| PMT4        | 11.30533 | 5.34E-11 | 3644096  |
| HXK2        | 11.29445 | 8.59E-30 | 3641015  |
| PGA10       | 11.27947 | 0.000416 | 3645009  |
| SEC12       | 11.24843 | 9.97E-11 | 3641639  |
| IPP1        | 11.23418 | 1.65E-20 | 3643874  |
| HYR1        | 11.19754 | 0.007094 | 3636226  |
| C5_05200C_A | 11.16652 | 5.27E-07 | 3636467  |
| ACB1        | 11.13361 | 2.29E-08 | 30515350 |
| HGT13       | 11.09998 | 0.009139 | 3638047  |
| HTB1        | 11.08604 | 5.93E-22 | 3645659  |
| HIS5        | 11.07781 | 0.000463 | 3645756  |
| ASN1        | 11.04034 | 2.74E-17 | 3645790  |
| CRC1        | 10.89127 | 1.47E-10 | 3640112  |
| ARE2        | 10.87502 | 9.47E-13 | 3643526  |
| C1_12180C_A | 10.81329 | 4.82E-05 | 3642038  |
| SSA2        | 10.68246 | 4.44E-15 | 3644711  |
| CAM1-1      | 10.64827 | 2.83E-15 | 3646358  |
| C1_11760C_A | 10.59087 | 4.75E-06 | 3645328  |

|             |          |          |          |
|-------------|----------|----------|----------|
| C1_02500W_A | 10.58613 | 0.00826  | 3636795  |
| APL4        | 10.57854 | 1.54E-09 | 3642565  |
| C4_07080C_A | 10.5631  | 0.000535 | 3642905  |
| CR_10530W_A | 10.54734 | 0.008554 | 3639042  |
| DUT1        | 10.53783 | 7.26E-05 | 3640188  |
| CAT2        | 10.52959 | 2E-16    | 3635659  |
| C1_07590C_A | 10.48875 | 5.28E-06 | 3646673  |
| CR_09670C_A | 10.4243  | 1.07E-09 | 3647091  |
| LYS12       | 10.40542 | 3.21E-14 | 3640134  |
| C1_00420W_A | 10.39157 | 8.9E-11  | 3639286  |
| C4_00020W_A | 10.37825 | 1.25E-11 | 3648053  |
| SAR1        | 10.37601 | 7.06E-09 | 3645865  |
| RIP1        | 10.34997 | 3.24E-15 | 3635204  |
| ERV29       | 10.34737 | 7.43E-07 | 3635672  |
| SEC18       | 10.31585 | 4.57E-14 | 3636208  |
| MDH1        | 10.29508 | 1.78E-18 | 3639667  |
| BMT4        | 10.26576 | 7.93E-07 | 3639182  |
| C6_02880W_A | 10.23887 | 0.010976 | 3639238  |
| PDA1        | 10.23438 | 6.69E-26 | 3642902  |
| GLC3        | 10.20591 | 1.34E-17 | 3639200  |
| CR_03270W_A | 10.19432 | 6.7E-05  | 3645101  |
| C5_04550W_A | 10.18278 | 6.99E-05 | 3636508  |
| NUC2        | 10.15506 | 1.28E-14 | 3637030  |
| PIL1        | 10.1486  | 8.59E-28 | 3644769  |
| C1_11960C_A | 10.13518 | 0.010331 | 30515060 |
| NUO1        | 10.1285  | 2.17E-07 | 3647100  |
| HET1        | 10.08937 | 2.08E-10 | 3647897  |
| MSH6        | 10.05593 | 2.14E-06 | 3636161  |
| GRP1        | 10.01927 | 0.000874 | 3634899  |
| C2_00180C_A | 10.01756 | 2.6E-06  | 3638905  |
| SUB2        | 10.01    | 4.08E-17 | 3645033  |
| MCM6        | 9.958443 | 0.000104 | 3640142  |
| CR_09230C_A | 9.953533 | 8.1E-05  | 3641918  |
| QCR7        | 9.952857 | 5.68E-09 | 3639233  |
| C3_06860C_A | 9.945282 | 6.38E-15 | 3638541  |
| C1_13270W_A | 9.927411 | 1.54E-06 | 3636144  |
| C5_01960C_A | 9.888138 | 1.53E-10 | 3643738  |
| CEX1        | 9.796031 | 8.84E-05 | 3644913  |
| C2_02020W_A | 9.773477 | 8.18E-10 | 3635769  |
| ATP5        | 9.730191 | 4.73E-17 | 3640521  |
| DED81       | 9.719106 | 3.23E-17 | 3646227  |
| ADE6        | 9.703398 | 3.74E-17 | 3647304  |
| CR_00130C_A | 9.691789 | 1.49E-08 | 3639709  |
| HGT2        | 9.63479  | 8.38E-15 | 3644579  |
| CR_04860C_A | 9.606546 | 0.012276 | 3647294  |
| C1_04780C_A | 9.590933 | 8.76E-06 | 3644774  |
| HOF1        | 9.563019 | 0.0002   | 3645014  |

|             |          |          |          |
|-------------|----------|----------|----------|
| C2_06610C_A | 9.556247 | 0.012088 | 30515140 |
| CLC1        | 9.526619 | 2.28E-10 | 3635662  |
| C3_03510C_A | 9.519302 | 2.97E-08 | 3638310  |
| C5_04950C_A | 9.51792  | 1.73E-06 | 3636422  |
| SDH12       | 9.482635 | 5.05E-19 | 3642775  |
| GVP36       | 9.479023 | 2.35E-06 | 3641772  |
| ABG1        | 9.475219 | 6.07E-07 | 3647715  |
| HGT10       | 9.459689 | 2.7E-08  | 3640309  |
| C2_05290C_A | 9.41889  | 0.000145 | 3643472  |
| EXG2        | 9.382717 | 0.000159 | 3636816  |
| VMA8        | 9.378104 | 9.59E-09 | 3642798  |
| MET15       | 9.365122 | 9.76E-11 | 3645031  |
| C2_10200W_A | 9.35755  | 0.012913 | 3643928  |
| CR_05130C_A | 9.353852 | 0.01266  | 3646401  |
| C1_07510W_A | 9.348398 | 0.001071 | 3646664  |
| SEF2        | 9.348245 | 0.001067 | 3647052  |
| MTS1        | 9.299234 | 3.58E-13 | 3634873  |
| ALS4        | 9.29918  | 3.3E-16  | 3647972  |
| SSH1        | 9.298413 | 9.36E-07 | 3642504  |
| INP51       | 9.27662  | 1.2E-05  | 3643806  |
| LYS4        | 9.259959 | 6.87E-06 | 3641180  |
| RPS12       | 9.218562 | 1.1E-15  | 3638438  |
| C5_02210W_A | 9.210499 | 3.01E-06 | 3637759  |
| PDC11       | 9.199961 | 7.14E-22 | 3642780  |
| CDC5        | 9.196171 | 1.8E-10  | 3639281  |
| C1_10520W_A | 9.179259 | 0.014305 | 3647191  |
| MET6        | 9.146335 | 2.39E-21 | 3640084  |
| RIC1        | 9.139621 | 0.000148 | 3639331  |
| FTR2        | 9.112545 | 7.84E-10 | 3643303  |
| C1_01800W_A | 9.111195 | 0.00131  | 3645407  |
| LIP6        | 9.107916 | 0.014414 | 3634890  |
| STV1        | 9.102005 | 1.53E-14 | 3646070  |
| C7_04000W_A | 9.079604 | 3.17E-06 | 3643114  |
| ATP17       | 9.030875 | 4.04E-12 | 30515364 |
| ECM33       | 8.989139 | 2.55E-18 | 30514977 |
| C6_03320W_A | 8.984097 | 0.000227 | 3639198  |
| RPL43A      | 8.981992 | 5.37E-15 | 30515319 |
| C2_02310W_A | 8.965554 | 2.55E-07 | 3635809  |
| CRD2        | 8.944269 | 0.014348 | 30515234 |
| CAP4        | 8.929689 | 0.001445 | 3637335  |
| MSC7        | 8.920142 | 8.23E-11 | 3645214  |
| CR_10140W_A | 8.886184 | 4.71E-16 | 3638972  |
| MPS1        | 8.844632 | 0.015309 | 3641888  |
| VMA11       | 8.839008 | 2.17E-05 | 3637054  |
| GDH3        | 8.810927 | 5.21E-19 | 3648086  |
| C7_02100W_A | 8.805456 | 5.91E-14 | 3637023  |
| PRN4        | 8.773161 | 2.66E-05 | 3639877  |

|             |          |          |          |
|-------------|----------|----------|----------|
| ILV6        | 8.763517 | 1.52E-09 | 3635598  |
| RTT109      | 8.761953 | 0.016201 | 3639678  |
| C7_02520W_A | 8.725516 | 0.016478 | 3636941  |
| NIF3        | 8.712736 | 5.14E-06 | 3646527  |
| C2_02260W_A | 8.67693  | 8.39E-07 | 3635778  |
| CDC12       | 8.676501 | 2.27E-10 | 3636809  |
| ADH2        | 8.6686   | 2.44E-20 | 3640751  |
| MSB1        | 8.660026 | 5.58E-06 | 3648218  |
| JEM1        | 8.627393 | 0.00181  | 3643876  |
| PTP3        | 8.607839 | 7.37E-15 | 3638940  |
| HOM3        | 8.570892 | 1.53E-05 | 3641771  |
| ENA21       | 8.557637 | 7.05E-23 | 3641392  |
| C5_03120W_A | 8.533618 | 0.016998 | 3637705  |
| MCM2        | 8.530397 | 0.016971 | 3643197  |
| GLO2        | 8.527836 | 1E-06    | 3644067  |
| C1_11280W_A | 8.514242 | 9.04E-09 | 3644554  |
| VCX1        | 8.500969 | 7.85E-07 | 3646508  |
| C4_03290W_A | 8.481667 | 1.84E-09 | 3637887  |
| DPB4        | 8.442559 | 0.000266 | 3638818  |
| C5_05230C_A | 8.429344 | 8.84E-17 | 3636470  |
| CR_04880W_A | 8.424807 | 4.39E-05 | 3647309  |
| C6_02530C_A | 8.415596 | 0.000279 | 3639175  |
| SEP7        | 8.377203 | 3.42E-05 | 3644596  |
| ACC1        | 8.340154 | 2.04E-24 | 3639688  |
| C6_02250W_A | 8.330526 | 0.01863  | 3645869  |
| C1_02330C_A | 8.315534 | 1.56E-14 | 30514969 |
| C4_06160W_A | 8.296779 | 0.001963 | 3642819  |
| C1_12400C_A | 8.258471 | 6.2E-05  | 3642059  |
| C6_00930C_A | 8.245865 | 3.14E-09 | 3644032  |
| C3_01020W_A | 8.242534 | 0.002082 | 3639828  |
| TVP18       | 8.197944 | 0.000342 | 3634844  |
| HSL1        | 8.187977 | 6.32E-08 | 3637810  |
| NDE1        | 8.179892 | 2.03E-22 | 3638354  |
| C4_01460C_A | 8.158487 | 0.002268 | 3635622  |
| LSP1        | 8.141147 | 8.25E-19 | 3648025  |
| ARF3        | 8.135405 | 0.020972 | 3636628  |
| RPS7A       | 8.117182 | 3.73E-15 | 3636573  |
| SER1        | 8.110336 | 3.52E-10 | 3646909  |
| HIS7        | 8.103035 | 4.42E-06 | 3647868  |
| CR_01100C_A | 8.077892 | 0.023063 | 3640378  |
| C3_06920W_A | 8.076741 | 1.97E-06 | 3638511  |
| PEX6        | 8.032538 | 1.97E-09 | 3643436  |
| CR_05800C_A | 8.020212 | 0.021308 | 3646706  |
| SCP1        | 8.018936 | 0.021328 | 3646554  |
| OSM2        | 8.017323 | 2.22E-09 | 3636193  |
| ASR1        | 8.01293  | 1.31E-17 | 3644402  |
| VPS51       | 8.00038  | 0.000358 | 3639242  |



|             |          |          |          |
|-------------|----------|----------|----------|
| C2_05860C_A | 7.998921 | 0.023943 | 3647473  |
| APL2        | 7.995099 | 1.39E-07 | 3638343  |
| LYS1        | 7.984475 | 1.67E-07 | 6335429  |
| C4_04800W_A | 7.940051 | 1.03E-11 | 3641113  |
| C6_03960W_A | 7.936324 | 3.68E-14 | 3640269  |
| C1_04030W_A | 7.932285 | 0.0004   | 3646428  |
| SNF5        | 7.917592 | 3.88E-06 | 3648297  |
| CR_10440W_A | 7.916025 | 0.021795 | 3638976  |
| ERG5        | 7.88777  | 1.96E-15 | 3641400  |
| APM4        | 7.884545 | 0.000431 | 3642297  |
| SDH2        | 7.873263 | 8.71E-12 | 3646397  |
| TPI1        | 7.864224 | 1.01E-23 | 3638482  |
| ATP4        | 7.8503   | 1.5E-15  | 3643418  |
| CR_00910W_A | 7.825181 | 1.81E-12 | 30515371 |
| PRD1        | 7.813247 | 4.04E-15 | 3642471  |
| CAS1        | 7.802475 | 0.000398 | 3645324  |
| MDH1-3      | 7.800968 | 1.13E-09 | 3641197  |
| RPP1A       | 7.800917 | 2.92E-14 | 3636839  |
| MMD1        | 7.792773 | 4.84E-14 | 30515015 |
| AAT1        | 7.791468 | 2.58E-14 | 3643468  |
| C4_04160W_A | 7.767464 | 2.19E-12 | 3641185  |
| C4_03400W_A | 7.766041 | 0.00316  | 30515256 |
| CUP5        | 7.765994 | 5.29E-10 | 3635174  |
| PEX8        | 7.750729 | 7.44E-05 | 3647393  |
| GDE1        | 7.750483 | 9.1E-09  | 3636505  |
| AHP1        | 7.740095 | 3.84E-19 | 3637850  |
| CR_04850C_A | 7.725135 | 0.02515  | 3647295  |
| MNS1        | 7.71835  | 3.13E-07 | 3644692  |
| C1_02650W_A | 7.715827 | 6.09E-09 | 3636818  |
| NDH51       | 7.691366 | 1.32E-13 | 3645444  |
| C1_05670W_A | 7.688274 | 1.96E-10 | 3639899  |
| RNR1        | 7.682349 | 4.43E-09 | 3642989  |
| C1_02700C_A | 7.672419 | 1.56E-12 | 30514972 |
| C3_01610W_A | 7.668465 | 8.95E-14 | 3636664  |
| C2_06260W_A | 7.665574 | 0.26227  | 3646913  |
| ERG9        | 7.659297 | 1.3E-11  | 3643913  |
| C2_01260W_A | 7.651946 | 0.002791 | 3638792  |
| GCV1        | 7.64758  | 1.14E-09 | 3639172  |
| VMA5        | 7.636608 | 3.45E-07 | 3642316  |
| CR_09010C_A | 7.612967 | 1.52E-13 | 3641892  |
| C6_04280W_A | 7.567113 | 3.27E-08 | 3646279  |
| BMH1        | 7.555297 | 1.92E-19 | 3636810  |
| TPD3        | 7.546685 | 7.84E-10 | 3638512  |
| HGT1        | 7.5446   | 1.56E-22 | 3645420  |
| C1_05490C_A | 7.533166 | 5.79E-07 | 3642507  |
| C7_03350C_A | 7.518639 | 0.029762 | 3646722  |
| PEX11       | 7.51636  | 0.000117 | 3646288  |

|             |          |          |          |
|-------------|----------|----------|----------|
| C4_04920W_A | 7.492965 | 0.000107 | 3641172  |
| KIP1        | 7.480809 | 0.003329 | 3645261  |
| MEU1        | 7.457566 | 1.6E-05  | 3645635  |
| MNT1        | 7.453139 | 2.5E-16  | 3636585  |
| CPR3        | 7.449862 | 3.57E-10 | 3635812  |
| SOD1        | 7.421232 | 2.59E-05 | 30515248 |
| TOM20       | 7.402684 | 1.49E-06 | 3636817  |
| DPP2        | 7.360321 | 0.003333 | 3645341  |
| C6_02030C_A | 7.35537  | 1.35E-08 | 3647562  |
| C1_04460C_A | 7.336242 | 0.000116 | 3646140  |
| GIN4        | 7.324827 | 2.5E-05  | 3644543  |
| POR1        | 7.320476 | 3.45E-20 | 3644698  |
| SMC2        | 7.320295 | 0.000144 | 3643918  |
| C1_12240C_A | 7.30542  | 7.3E-06  | 3642023  |
| ARC40       | 7.302213 | 3.05E-10 | 3644866  |
| CIT1        | 7.256125 | 1.25E-16 | 3643201  |
| PYC2        | 7.237156 | 3.31E-15 | 3637323  |
| C3_00520W_A | 7.229116 | 0.003898 | 3640513  |
| C2_03210W_A | 7.18398  | 0.003984 | 30515098 |
| C1_08800W_A | 7.179433 | 4.16E-06 | 3634791  |
| SHM2        | 7.152145 | 9.39E-19 | 3640306  |
| KGD2        | 7.138535 | 2.32E-13 | 3646036  |
| CYK3        | 7.122176 | 0.000747 | 3639539  |
| CSR1        | 7.099592 | 0.000679 | 3641162  |
| CR_09560C_A | 7.096446 | 0.030543 | 3647099  |
| C1_03490W_A | 7.087974 | 6.72E-07 | 3636914  |
| GLO1        | 7.07578  | 1.03E-09 | 3639312  |
| C4_02420C_A | 7.069668 | 0.031899 | 3637849  |
| PMT1        | 7.063282 | 1.3E-12  | 3641393  |
| C1_08080C_A | 7.037117 | 3.13E-06 | 30515029 |
| CR_07230W_A | 7.010151 | 1.37E-06 | 3646031  |
| CSM3        | 7.001523 | 0.033983 | 3644083  |
| C4_06140C_A | 6.99482  | 0.031327 | 3642821  |
| C1_01950C_A | 6.975805 | 0.000801 | 3645421  |
| PST2        | 6.972634 | 0.001248 | 3643909  |
| FRE30       | 6.906975 | 3.97E-13 | 3646025  |
| STT3        | 6.906323 | 5.44E-09 | 3635743  |
| C1_08730W_A | 6.895941 | 0.000855 | 3634938  |
| C7_00230W_A | 6.876814 | 0.000253 | 3637982  |
| AHP2        | 6.852312 | 3.5E-06  | 3636977  |
| GLT1        | 6.840914 | 7.56E-18 | 3639519  |
| TPO3        | 6.839913 | 1.31E-18 | 3634790  |
| BFR1        | 6.833918 | 1.14E-12 | 3635579  |
| CAM1        | 6.796194 | 1.75E-17 | 3641734  |
| HNT2        | 6.789456 | 0.034447 | 3642271  |
| C1_02890C_A | 6.787293 | 0.006354 | 3636867  |
| ALG8        | 6.783245 | 0.00576  | 3636562  |

|             |          |          |          |
|-------------|----------|----------|----------|
| TFS1        | 6.780277 | 4.72E-14 | 3642655  |
| FRE7        | 6.779014 | 6.07E-16 | 3646024  |
| VMA7        | 6.772082 | 0.001065 | 3637332  |
| NPT1        | 6.761929 | 3.04E-08 | 3643109  |
| MES1        | 6.755443 | 3.99E-12 | 3636516  |
| CR_01320C_A | 6.706802 | 1.09E-05 | 3640386  |
| RPL10A      | 6.70306  | 1.88E-17 | 3645868  |
| CR_04770C_A | 6.688718 | 0.036892 | 3647302  |
| FBA1        | 6.682164 | 4.23E-19 | 3635585  |
| C1_00450C_A | 6.673701 | 5.55E-06 | 30514955 |
| FMA1        | 6.66779  | 0.040017 | 3647986  |
| PDR17       | 6.665375 | 0.007274 | 3643007  |
| C2_05560W_A | 6.653168 | 0.001099 | 3645561  |
| C6_00770C_A | 6.648109 | 0.038196 | 3647079  |
| C4_06460C_A | 6.633094 | 0.006604 | 3642791  |
| CPY1        | 6.617944 | 7.12E-14 | 3646721  |
| C1_14240W_A | 6.615953 | 3.6E-09  | 3643306  |
| RPP1B       | 6.613034 | 2.74E-11 | 3643104  |
| EXO1        | 6.612015 | 0.001172 | 3641583  |
| C6_03950C_A | 6.588619 | 0.000308 | 3640268  |
| C4_00770C_A | 6.5855   | 6.21E-06 | 3645760  |
| TOP2        | 6.58452  | 3.08E-06 | 3642777  |
| FAA21       | 6.560447 | 9.66E-08 | 3638418  |
| C3_00210C_A | 6.550568 | 0.007573 | 3640560  |
| CRN1        | 6.550025 | 2.35E-09 | 3637034  |
| TOS4        | 6.517065 | 2.89E-08 | 3644548  |
| C2_05170W_A | 6.516457 | 1.33E-05 | 3643462  |
| C1_01010W_A | 6.51618  | 2.79E-06 | 3640181  |
| C1_01050C_A | 6.510054 | 4.3E-08  | 3640170  |
| RNH35       | 6.478249 | 0.040537 | 3636987  |
| C2_09780C_A | 6.474852 | 3.8E-06  | 3643805  |
| FUM11       | 6.463995 | 6.66E-11 | 3641016  |
| DPM3        | 6.462668 | 0.007387 | 30515245 |
| CR_06770C_A | 6.461552 | 0.0001   | 3647313  |
| C1_11860W_A | 6.45925  | 1.1E-11  | 3642009  |
| C3_07230W_A | 6.449655 | 1.87E-06 | 3638531  |
| DUR1,2      | 6.434535 | 3.53E-07 | 3644771  |
| HEM14       | 6.431241 | 2.28E-06 | 3634923  |
| ASM3        | 6.427277 | 0.00723  | 3639332  |
| C3_04420W_A | 6.405807 | 9.66E-12 | 3635180  |
| CR_05200C_A | 6.402248 | 0.000336 | 3648080  |
| C3_05290C_A | 6.388873 | 0.008138 | 3635203  |
| CR_03560W_A | 6.358117 | 0.00803  | 3643217  |
| C3_01510W_A | 6.335304 | 2.26E-05 | 3636571  |
| HBR2        | 6.329786 | 5.81E-12 | 3646273  |
| YSA1        | 6.326478 | 8.5E-06  | 3638516  |
| CR_09520C_A | 6.315515 | 0.007797 | 3647103  |

|             |          |          |          |
|-------------|----------|----------|----------|
| CR_05760C_A | 6.314525 | 0.007741 | 3646695  |
| RAD53       | 6.31403  | 0.007725 | 3645633  |
| SKN1        | 6.306224 | 2.61E-12 | 3641755  |
| C1_10750C_A | 6.289134 | 0.009024 | 30515043 |
| C5_05350W_A | 6.287215 | 0.000528 | 3636401  |
| CR_02260C_A | 6.284092 | 0.000458 | 3644912  |
| C1_03170C_A | 6.277787 | 0.044352 | 3636805  |
| ASE1        | 6.271207 | 0.001781 | 3641729  |
| C1_03720C_A | 6.267331 | 1.25E-06 | 3648216  |
| CR_00060C_A | 6.256668 | 2.09E-08 | 3639673  |
| IFA4        | 6.193483 | 0.008321 | 3645454  |
| C5_04420W_A | 6.185616 | 2.72E-05 | 3636411  |
| AGE3        | 6.175083 | 8.39E-07 | 3644565  |
| SPC34       | 6.174908 | 0.045739 | 3641173  |
| C2_06750C_A | 6.173299 | 0.045157 | 3648023  |
| CR_05680C_A | 6.169514 | 0.000538 | 3646684  |
| PUP2        | 6.163621 | 1.19E-09 | 3646617  |
| C2_07420W_A | 6.155076 | 2.95E-05 | 3645202  |
| SMF3        | 6.139635 | 5.9E-08  | 3638852  |
| RPS26A      | 6.138237 | 2.3E-13  | 3635787  |
| C7_03310W_A | 6.1373   | 0.00859  | 3646726  |
| C5_00340W_A | 6.136474 | 5.75E-05 | 3641555  |
| MET13       | 6.131471 | 1.07E-06 | 3638382  |
| RPL18       | 6.127428 | 1.75E-15 | 3635156  |
| C4_00380W_A | 6.107242 | 0.000202 | 3645015  |
| DUN1        | 6.105266 | 0.001924 | 3636494  |
| C5_01550C_A | 6.096026 | 1.34E-10 | 3647063  |
| IST2        | 6.088737 | 1.6E-10  | 3646662  |
| RPS8A       | 6.085989 | 5.77E-15 | 3645565  |
| LHS1        | 6.083757 | 1.26E-09 | 3643032  |
| RTS1        | 6.079976 | 2.62E-12 | 3646557  |
| FAS1        | 6.07583  | 2.91E-18 | 3641593  |
| ATP14       | 6.05898  | 1.02E-08 | 30515134 |
| SEC8        | 6.049678 | 3.02E-06 | 3647078  |
| C1_00210C_A | 6.049395 | 3.67E-12 | 3639335  |
| CR_09590W_A | 6.032873 | 1.19E-05 | 3647095  |
| CDC42       | 6.032377 | 1.23E-05 | 3646488  |
| C3_03270W_A | 6.020923 | 0.008905 | 3638321  |
| C3_04080W_A | 6.020881 | 6.3E-10  | 30515200 |
| C1_02290C_A | 6.019467 | 0.000647 | 3644568  |
| C6_01750C_A | 6.018196 | 0.009163 | 3641640  |
| C3_02820C_A | 6.015497 | 6.98E-06 | 3638419  |
| CR_00690C_A | 6.006395 | 0.000155 | 3640390  |
| SPC3        | 5.992998 | 0.000512 | 3636121  |
| CR_02620C_A | 5.978234 | 3.17E-06 | 3642567  |
| CR_06070W_A | 5.976799 | 7.95E-06 | 3644840  |
| TSC11       | 5.961847 | 0.009186 | 3645267  |

|             |          |          |          |
|-------------|----------|----------|----------|
| DSE1        | 5.961064 | 2.84E-07 | 3643899  |
| FESUR1      | 5.94994  | 1.37E-09 | 3638514  |
| CAR2        | 5.943874 | 2.25E-13 | 3645027  |
| C1_07340W_A | 5.943268 | 1.26E-09 | 3644472  |
| RPS1        | 5.934958 | 1E-16    | 3636924  |
| C1_01290C_A | 5.906609 | 0.009868 | 3640184  |
| RAM1        | 5.905462 | 0.009814 | 3647859  |
| C3_04810C_A | 5.891638 | 1.94E-14 | 30515205 |
| ZCF5        | 5.864084 | 0.000637 | 3641819  |
| RHB1        | 5.852705 | 0.011186 | 3635232  |
| TMA19       | 5.83485  | 3.69E-13 | 3640399  |
| ERG251      | 5.816651 | 2.37E-15 | 3635716  |
| SAH1        | 5.81624  | 1.85E-15 | 3636452  |
| C1_02780W_A | 5.81169  | 6E-08    | 3636871  |
| APM1        | 5.810877 | 7.58E-07 | 3636424  |
| ADE5,7      | 5.802585 | 3.07E-13 | 3640719  |
| HXT5        | 5.797631 | 0.000161 | 3643209  |
| CMK2        | 5.781838 | 9.37E-09 | 3643961  |
| RAD10       | 5.773529 | 0.003184 | 3639884  |
| EFB1        | 5.742462 | 1.08E-14 | 3641125  |
| CR_05010W_A | 5.727934 | 0.011821 | 3646389  |
| SNL1        | 5.716529 | 9.55E-06 | 3647192  |
| C2_08930W_A | 5.701649 | 1.31E-08 | 3645795  |
| RPL28       | 5.690551 | 1.4E-13  | 30515386 |
| C5_01410C_A | 5.68769  | 3.35E-06 | 3647054  |
| SAC6        | 5.652498 | 2.63E-14 | 3639213  |
| AMO1        | 5.650111 | 0.000759 | 3642994  |
| NPL4        | 5.647093 | 1.92E-05 | 3639820  |
| SOD2        | 5.646145 | 1.4E-08  | 3640231  |
| AYR1        | 5.629517 | 0.000357 | 3647754  |
| ACS1        | 5.62452  | 1.96E-13 | 3643941  |
| CR_04870C_A | 5.621806 | 0.018734 | 3647310  |
| C7_03640C_A | 5.611657 | 0.012997 | 3646223  |
| C1_10540C_A | 5.582762 | 0.000768 | 3647193  |
| C3_02570W_A | 5.578936 | 6.03E-06 | 3638375  |
| C2_03340W_A | 5.57542  | 2.49E-05 | 3637392  |
| C2_07980W_A | 5.568084 | 0.000506 | 3642312  |
| C1_01250W_A | 5.561431 | 3.09E-06 | 3640212  |
| ARP2        | 5.553459 | 4.76E-11 | 3641915  |
| RPL19A      | 5.549315 | 1.47E-14 | 3635257  |
| ARO4        | 5.546603 | 5.73E-11 | 3647668  |
| DQD1        | 5.543162 | 2.78E-05 | 3643488  |
| ARO3        | 5.52984  | 3.74E-06 | 3635770  |
| RPS16A      | 5.517098 | 1.89E-12 | 30514974 |
| GLO3        | 5.496334 | 3.19E-12 | 3640556  |
| PMT5        | 5.490781 | 0.000416 | 3639011  |
| VPS1        | 5.487047 | 6.89E-12 | 3642656  |

|             |          |          |          |
|-------------|----------|----------|----------|
| TFP1        | 5.472819 | 3.13E-11 | 3636662  |
| ARC19       | 5.471655 | 0.003313 | 3640418  |
| CEK1        | 5.468878 | 0.003362 | 3642789  |
| C1_02270C_A | 5.466904 | 3.36E-07 | 3644566  |
| C4_06810C_A | 5.457723 | 3.4E-09  | 3642916  |
| COX6        | 5.455292 | 1.55E-12 | 30515099 |
| CYB2        | 5.452434 | 7.11E-06 | 3636213  |
| C5_05040W_A | 5.445535 | 0.00107  | 3636488  |
| C7_00600C_A | 5.445448 | 0.00103  | 3638031  |
| GRS1        | 5.431191 | 5.54E-13 | 3642474  |
| C2_06950C_A | 5.423927 | 0.004328 | 3643527  |
| DSL1        | 5.404437 | 0.003725 | 3645718  |
| RPL35       | 5.383264 | 7.43E-12 | 30515207 |
| C1_10730W_A | 5.368796 | 7.24E-06 | 3644404  |
| C4_04140W_A | 5.368423 | 0.001162 | 3641220  |
| ABP1        | 5.359814 | 1.01E-12 | 3637875  |
| TYR1        | 5.347187 | 3.88E-05 | 3635639  |
| C4_00910C_A | 5.331697 | 0.004047 | 3635679  |
| C3_06400C_A | 5.325917 | 0.018652 | 3642260  |
| VMA13       | 5.298794 | 2E-08    | 30515402 |
| RAP1        | 5.290834 | 4.72E-05 | 3643945  |
| YBN5        | 5.289948 | 1.47E-11 | 3644781  |
| C2_01930C_A | 5.269838 | 2.02E-07 | 3635793  |
| APT1        | 5.264679 | 1E-05    | 3635842  |
| C6_00090W_A | 5.262646 | 0.01869  | 3647898  |
| FUM12       | 5.242811 | 1.07E-09 | 3638489  |
| COQ3        | 5.226264 | 2.26E-05 | 3641630  |
| C6_01360W_A | 5.210236 | 0.001375 | 3641608  |
| DOT1        | 5.205295 | 1.28E-05 | 3642236  |
| RAD52       | 5.19075  | 0.001691 | 3647148  |
| C3_05300C_A | 5.141999 | 0.001637 | 3643646  |
| THR4        | 5.138371 | 1.55E-10 | 3637711  |
| C6_02470W_A | 5.13064  | 3.13E-06 | 3639169  |
| C2_07110C_A | 5.117042 | 0.00066  | 3643505  |
| DBF2        | 5.108505 | 1.87E-05 | 3648101  |
| SUN41       | 5.106095 | 7.16E-13 | 3647067  |
| RPL20B      | 5.102767 | 3.66E-11 | 3635615  |
| IDH2        | 5.098195 | 4.84E-12 | 3642979  |
| APL5        | 5.074075 | 4.6E-06  | 3638377  |
| C1_07990C_A | 5.056838 | 6.44E-10 | 3640697  |
| GPX3        | 5.033956 | 0.001869 | 3644471  |
| C1_06630W_A | 5.033842 | 0.001882 | 3639544  |
| TRP99       | 5.023769 | 1.05E-05 | 3642494  |
| GLR1        | 5.022126 | 1.46E-10 | 3647061  |
| CR_01080W_A | 4.998284 | 8.52E-08 | 3640381  |
| C7_01320W_A | 4.988729 | 2.77E-05 | 3645896  |
| SSB1        | 4.981428 | 7.25E-14 | 3642095  |

|             |          |          |          |
|-------------|----------|----------|----------|
| FCY2        | 4.977917 | 2.98E-05 | 3638365  |
| UBA2        | 4.977542 | 8.81E-05 | 3640701  |
| C1_02910C_A | 4.971844 | 0.019995 | 3636829  |
| RFC3        | 4.96747  | 0.006506 | 3647440  |
| MUM2        | 4.954608 | 7.09E-09 | 3636432  |
| VPS23       | 4.943061 | 0.005874 | 3644401  |
| C3_00850C_A | 4.941521 | 4.52E-12 | 3647748  |
| C7_03820C_A | 4.940548 | 0.08332  | 3643148  |
| C3_02210C_A | 4.925435 | 0.000101 | 3636641  |
| PEX1        | 4.915592 | 2.41E-07 | 3636943  |
| SPF1        | 4.915234 | 2.47E-09 | 3646573  |
| CR_07110C_A | 4.914138 | 0.021542 | 3648224  |
| KAR2        | 4.911254 | 1.55E-12 | 3638830  |
| MCI4        | 4.904653 | 3.22E-05 | 3640118  |
| ECI1        | 4.899577 | 1.69E-05 | 3642128  |
| PET9        | 4.896564 | 4.26E-14 | 3641587  |
| MVB12       | 4.893855 | 0.002175 | 30515400 |
| BUB1        | 4.886884 | 3.45E-05 | 3637922  |
| POT1        | 4.881967 | 3.19E-09 | 3639707  |
| C4_04440W_A | 4.881063 | 3.58E-05 | 3641177  |
| RPS14B      | 4.874681 | 5.1E-10  | 30515006 |
| C1_02970W_A | 4.871933 | 1.02E-07 | 3636835  |
| C2_04480W_A | 4.866503 | 0.000119 | 3645464  |
| C1_00330C_A | 4.86456  | 0.000336 | 3639296  |
| C2_05130W_A | 4.860908 | 0.002471 | 3643458  |
| C2_01160W_A | 4.855745 | 0.001079 | 3638861  |
| END3        | 4.851561 | 2.69E-05 | 3636644  |
| ADE13       | 4.84921  | 8.5E-13  | 3644863  |
| CR_08450C_A | 4.847181 | 0.000436 | 3642133  |
| SHM1        | 4.846876 | 1.24E-10 | 3646724  |
| ANB1        | 4.844189 | 3.24E-11 | 3641648  |
| ZRT1        | 4.836115 | 0.024951 | 3642970  |
| ATP7        | 4.831249 | 3.1E-07  | 3646672  |
| CDC46       | 4.824044 | 0.008623 | 3646912  |
| C2_07270W_A | 4.817535 | 0.000191 | 3643474  |
| ESP1        | 4.815058 | 0.001115 | 3640197  |
| HEM13       | 4.812616 | 1.07E-11 | 3647390  |
| C1_12880C_A | 4.810871 | 0.000115 | 3636151  |
| CR_07120C_A | 4.807038 | 0.009764 | 3648225  |
| CLB2        | 4.805404 | 3.17E-07 | 3635840  |
| YCP4        | 4.802347 | 3.93E-11 | 3648032  |
| ZCF24       | 4.79986  | 0.002743 | 3645417  |
| C4_01470W_A | 4.797172 | 0.02391  | 3635621  |
| ADO1        | 4.792085 | 6.89E-08 | 3639274  |
| HYU1        | 4.790267 | 1.86E-07 | 3643024  |
| SHP1        | 4.7879   | 9.63E-08 | 3640083  |
| PGA54       | 4.784819 | 5.98E-06 | 3637929  |

|             |          |          |          |
|-------------|----------|----------|----------|
| CR_08670C_A | 4.784242 | 0.004562 | 3642126  |
| C4_00190W_A | 4.784157 | 0.026083 | 3645030  |
| C4_05810W_A | 4.774123 | 3.98E-11 | 3641786  |
| ALS1        | 4.773698 | 2.72E-12 | 3640280  |
| C1_07820W_A | 4.766812 | 0.008476 | 3640735  |
| VRG4        | 4.765142 | 2.21E-05 | 3641768  |
| CR_03530W_A | 4.764333 | 6E-11    | 3643204  |
| COX4        | 4.761933 | 2E-10    | 3635737  |
| C1_07840W_A | 4.74667  | 3.32E-08 | 3640737  |
| C2_09250W_A | 4.73521  | 0.025772 | 3644065  |
| CCC1        | 4.735147 | 4.15E-05 | 3645645  |
| CHS2        | 4.726487 | 2.82E-07 | 3641893  |
| RAD51       | 4.721485 | 1.7E-06  | 3644944  |
| C6_01460C_A | 4.713532 | 0.001102 | 3641623  |
| MRP8        | 4.703489 | 0.000999 | 3641178  |
| ARL3        | 4.70155  | 8.2E-05  | 3644397  |
| CR_02770C_A | 4.686288 | 6.33E-05 | 3642581  |
| RHD1        | 4.678515 | 2.18E-06 | 3647531  |
| ECM39       | 4.677118 | 0.000282 | 3641386  |
| RPP0        | 4.67709  | 1.57E-12 | 3638023  |
| MNN10       | 4.675716 | 3.84E-05 | 3644997  |
| BNR1        | 4.673159 | 0.000238 | 3639672  |
| PLB5        | 4.669618 | 7.88E-05 | 3640750  |
| C4_02930W_A | 4.667741 | 0.030369 | 3637876  |
| SUC1        | 4.647869 | 2.14E-05 | 3641916  |
| BET4        | 4.644508 | 0.029015 | 3644695  |
| C3_05280C_A | 4.643136 | 0.0029   | 3635202  |
| C7_03200C_A | 4.642943 | 8.24E-05 | 3641342  |
| C6_00110C_A | 4.642241 | 0.000998 | 3647896  |
| RPL17B      | 4.636212 | 5.49E-12 | 3645439  |
| C1_03440C_A | 4.63618  | 2.73E-07 | 3636908  |
| XKS1        | 4.626103 | 8.78E-11 | 3648306  |
| C3_04590W_A | 4.620455 | 4.11E-08 | 30515204 |
| C7_03780C_A | 4.620165 | 0.028384 | 3643119  |
| PRS         | 4.616869 | 0.010077 | 3640100  |
| ERG4        | 4.605261 | 3.99E-10 | 3640511  |
| PST1        | 4.592851 | 1.24E-05 | 3643520  |
| CDC73       | 4.576266 | 1.23E-05 | 3636830  |
| C1_07440W_A | 4.576005 | 8.94E-08 | 3644482  |
| CR_07640C_A | 4.574011 | 0.010049 | 3647258  |
| C3_04780C_A | 4.573436 | 0.00011  | 3635214  |
| C1_11740W_A | 4.57214  | 0.010421 | 3645317  |
| C3_04970C_A | 4.565463 | 2.45E-07 | 3635164  |
| AOX1        | 4.564104 | 0.012332 | 3634946  |
| C7_00520W_A | 4.555587 | 1.73E-10 | 3638001  |
| C3_04460W_A | 4.553939 | 1.17E-05 | 3635208  |
| C4_04090C_A | 4.54992  | 0.000271 | 3641225  |



|             |          |          |          |
|-------------|----------|----------|----------|
| C7_00150W_A | 4.53436  | 3.77E-08 | 3637973  |
| SOD5        | 4.528373 | 9.43E-05 | 3638886  |
| RNH1        | 4.527781 | 6.15E-05 | 3639237  |
| RPL13       | 4.522181 | 7.61E-11 | 3636841  |
| CTA2        | 4.510811 | 3.26E-05 | 3639372  |
| TLO9        | 4.492328 | 5.46E-05 | 3648051  |
| C4_01730C_A | 4.484703 | 1.57E-05 | 3635588  |
| OBPA        | 4.483625 | 6.28E-10 | 3643764  |
| C2_10860C_A | 4.481975 | 4.23E-08 | 3641233  |
| ARO2        | 4.461283 | 6.85E-08 | 3648190  |
| DNM1        | 4.447179 | 6.48E-10 | 3643673  |
| CR_00880W_A | 4.446845 | 0.032787 | 3640397  |
| HOC1        | 4.442325 | 1.63E-05 | 3641605  |
| PHB1        | 4.437346 | 8.52E-06 | 3645641  |
| IQG1        | 4.43387  | 1.97E-06 | 3637052  |
| C2_08160C_A | 4.421769 | 5.35E-08 | 30515152 |
| GCF1        | 4.419751 | 3.75E-08 | 3646498  |
| HEM4        | 4.40646  | 0.001477 | 3643942  |
| ALG6        | 4.404784 | 0.001578 | 3647316  |
| RFC4        | 4.39987  | 0.000458 | 3638994  |
| C4_00590C_A | 4.398026 | 5.44E-10 | 3645772  |
| C1_05990C_A | 4.392687 | 0.004265 | 3639871  |
| UBI3        | 4.391692 | 1.26E-10 | 3642934  |
| RPL3        | 4.383679 | 6.25E-13 | 3647719  |
| MYO2        | 4.381377 | 9.29E-06 | 3636140  |
| CR_02880W_A | 4.374263 | 0.038063 | 3642584  |
| UGA32       | 4.370585 | 0.012341 | 3639333  |
| RPS30       | 4.370089 | 1.14E-08 | 30515390 |
| GRE3        | 4.366848 | 1.65E-09 | 3637811  |
| TKL1        | 4.365052 | 4.15E-13 | 3640767  |
| LIP8        | 4.363147 | 0.000491 | 3646727  |
| C3_07450C_A | 4.361694 | 0.00434  | 3638481  |
| C1_10090C_A | 4.34984  | 5.51E-09 | 3634817  |
| CHS6        | 4.346294 | 0.000159 | 3641377  |
| C4_03770W_A | 4.34528  | 0.046655 | 3645354  |
| ENO1        | 4.336003 | 2.8E-12  | 3646493  |
| MYO1        | 4.333659 | 5.83E-05 | 3647248  |
| MMS21       | 4.327314 | 0.037069 | 3642265  |
| CR_01180W_A | 4.315798 | 4.58E-05 | 3640427  |
| ILV2        | 4.312168 | 1.84E-08 | 3636552  |
| CR_07460C_A | 4.311358 | 5.98E-05 | 3646049  |
| C6_03330C_A | 4.309888 | 0.000419 | 3639199  |
| ENG1        | 4.299672 | 4.28E-06 | 3636886  |
| C4_02400C_A | 4.298154 | 0.013966 | 3637851  |
| CDC3        | 4.298065 | 5.59E-08 | 3644719  |
| RIM1        | 4.296706 | 1.55E-05 | 3639898  |
| C5_01070C_A | 4.295627 | 0.000313 | 3642627  |

|             |          |          |          |
|-------------|----------|----------|----------|
| SOU2        | 4.293898 | 0.038642 | 3642823  |
| ERG12       | 4.28544  | 6E-05    | 3634859  |
| RPL5        | 4.284489 | 6.89E-12 | 3637057  |
| GFA1        | 4.277351 | 2.07E-09 | 3636557  |
| NIT3        | 4.276937 | 8.4E-05  | 3644408  |
| C1_01910W_A | 4.272056 | 8.96E-08 | 3645425  |
| C2_03450W_A | 4.268959 | 0.007832 | 3637349  |
| GYP1        | 4.268027 | 4.52E-06 | 3641138  |
| IFA21       | 4.265162 | 0.005069 | 3641344  |
| RPL6        | 4.261851 | 2.4E-10  | 30514975 |
| SMC5        | 4.252986 | 0.005488 | 3645103  |
| SMC3        | 4.243202 | 0.043385 | 3638408  |
| C4_01760W_A | 4.242486 | 2.22E-05 | 3635584  |
| C2_05850C_A | 4.239102 | 0.000488 | 3647472  |
| CDC68       | 4.234715 | 1.56E-09 | 3642787  |
| ERG8        | 4.215725 | 2.35E-05 | 3635640  |
| C4_03860C_A | 4.211368 | 0.040365 | 3647854  |
| C2_07440C_A | 4.204022 | 0.000168 | 3645200  |
| CR_02690W_A | 4.201904 | 0.002546 | 3642574  |
| GDB1        | 4.200819 | 3.2E-09  | 3647409  |
| GSP1        | 4.196436 | 7.01E-10 | 3646925  |
| C3_03560W_A | 4.193113 | 0.000705 | 3638299  |
| C6_02100W_A | 4.192912 | 0.002285 | 3647554  |
| CSP37       | 4.189841 | 1.87E-10 | 3640098  |
| YPT31       | 4.186633 | 2.54E-05 | 3647999  |
| C2_08650W_A | 4.185107 | 2.8E-05  | 3643908  |
| MEP1        | 4.178704 | 1.65E-06 | 3636553  |
| MED1        | 4.167546 | 0.000114 | 3637418  |
| LAP3        | 4.166183 | 3.03E-05 | 3641012  |
| GIN1        | 4.164229 | 0.00763  | 3644539  |
| C2_09560C_A | 4.164156 | 4.73E-05 | 3643813  |
| C6_01050W_A | 4.157014 | 0.000111 | 3644015  |
| C5_04770W_A | 4.156334 | 0.001418 | 3636444  |
| TFC4        | 4.153391 | 2.75E-05 | 3638420  |
| C3_03340C_A | 4.152087 | 0.000395 | 30515195 |
| C3_01420C_A | 4.138995 | 0.003243 | 3636634  |
| C3_01590W_A | 4.138928 | 0.006016 | 3636666  |
| C2_01320W_A | 4.125847 | 0.000143 | 3638846  |
| C6_03470W_A | 4.121491 | 3.63E-06 | 3640253  |
| IFR2        | 4.119613 | 4.43E-09 | 3645100  |
| MAK32       | 4.115919 | 0.016915 | 3645411  |
| ARA1        | 4.11289  | 1.07E-06 | 3642331  |
| TRS20       | 4.110238 | 0.045712 | 3640214  |
| C1_05320C_A | 4.108892 | 0.003495 | 3642470  |
| C1_01360C_A | 4.099856 | 1.28E-08 | 3640191  |
| RIB5        | 4.09884  | 2.89E-07 | 3636499  |
| C2_06920C_A | 4.097639 | 0.003275 | 3643524  |

|             |          |          |          |
|-------------|----------|----------|----------|
| GPM1        | 4.094811 | 1.1E-11  | 3637431  |
| C4_05790W_A | 4.093592 | 0.001493 | 3641784  |
| SGT2        | 4.091994 | 6.11E-09 | 3642978  |
| C6_03620C_A | 4.090275 | 3.4E-05  | 3640297  |
| MAM33       | 4.089564 | 4.31E-06 | 3643103  |
| POL3        | 4.088238 | 2.63E-05 | 3641359  |
| PTC6        | 4.080382 | 0.000175 | 3647351  |
| LRO1        | 4.076609 | 9.71E-07 | 3639356  |
| PAN3        | 4.075926 | 1.8E-05  | 3636464  |
| TEF1        | 4.057489 | 2.81E-12 | 3648254  |
| APN1        | 4.055585 | 0.00042  | 3642263  |
| C3_05880C_A | 4.054707 | 8.26E-07 | 3641737  |
| ETR1        | 4.053903 | 2.56E-09 | 3640561  |
| CR_01300W_A | 4.050269 | 0.000193 | 30515373 |
| C3_01820W_A | 4.044433 | 5.21E-07 | 3636584  |
| RFC2        | 4.042349 | 0.017617 | 3637939  |
| SDC1        | 4.036051 | 0.047579 | 3636542  |
| GWT1        | 4.035319 | 0.000939 | 3645575  |
| CBP1        | 4.034595 | 1.64E-07 | 3641920  |
| C2_01690W_A | 4.030003 | 1.13E-06 | 3635728  |
| FGR38       | 4.028997 | 0.000822 | 3645412  |
| C5_02400W_A | 4.01733  | 6.66E-07 | 3637724  |
| PGA53       | 4.00596  | 0.000596 | 3635599  |
| CR_08900C_A | 4.004752 | 4.06E-05 | 3641908  |
| NUF2        | 4.000134 | 0.009743 | 3642613  |
| NAM2        | 3.9956   | 0.000951 | 3640275  |
| SEC27       | 3.986826 | 1.86E-09 | 3645870  |
| CR_03460W_A | 3.98451  | 0.000102 | 3643213  |
| FAA2-1      | 3.976596 | 3.15E-05 | 3644100  |
| RPL37B      | 3.968491 | 1.92E-08 | 30515053 |
| RTA2        | 3.966534 | 3.42E-09 | 3646567  |
| RPS3        | 3.960462 | 2.57E-09 | 3647299  |
| MAL2        | 3.958848 | 0.001163 | 3638946  |
| ARP9        | 3.954072 | 0.000538 | 3639829  |
| EIF4E       | 3.949179 | 7.03E-08 | 3638981  |
| C1_02440C_A | 3.949013 | 0.00381  | 3636848  |
| SEC26       | 3.948852 | 1.44E-09 | 3641005  |
| C3_02190C_A | 3.947474 | 9.35E-05 | 3636642  |
| RFC1        | 3.941991 | 4.86E-07 | 3645582  |
| YMC1        | 3.936085 | 0.000845 | 3644474  |
| FGR51       | 3.926193 | 0.001023 | 3647796  |
| RPS13       | 3.920084 | 4.08E-09 | 30515328 |
| ORC3        | 3.913576 | 0.000265 | 3645639  |
| C1_08040W_A | 3.900356 | 0.010291 | 30515028 |
| CMK1        | 3.888962 | 1.87E-09 | 3635263  |
| C1_11120C_A | 3.885287 | 4.71E-06 | 3644412  |
| CSE4        | 3.884084 | 0.001935 | 3647750  |

|             |          |          |          |
|-------------|----------|----------|----------|
| CR_07350W_A | 3.881453 | 6.36E-07 | 3646055  |
| C6_00270W_A | 3.874674 | 0.000671 | 3646066  |
| C4_02620C_A | 3.863685 | 1.87E-10 | 3637834  |
| MON2        | 3.86338  | 4.16E-06 | 3636201  |
| ECM4        | 3.861272 | 3.48E-09 | 3640144  |
| HEM15       | 3.860449 | 7.65E-09 | 3645211  |
| RBT1        | 3.852977 | 0.026366 | 3645377  |
| YST1        | 3.847571 | 2.76E-09 | 3643678  |
| C4_06710W_A | 3.844873 | 0.004744 | 3642948  |
| C5_00060C_A | 3.844642 | 0.004779 | 3647889  |
| C6_04560W_A | 3.838336 | 1.95E-07 | 3645977  |
| DLD2        | 3.833643 | 0.002306 | 3638475  |
| CR_05900W_A | 3.828715 | 0.009064 | 3646681  |
| C4_00330C_A | 3.811174 | 4.68E-05 | 30515227 |
| C6_00200C_A | 3.810169 | 0.000105 | 3646082  |
| GEA2        | 3.808547 | 3.25E-06 | 3636646  |
| TOM22       | 3.805063 | 0.000344 | 3647650  |
| ILV3        | 3.801724 | 2.26E-07 | 3636428  |
| CR_09570W_A | 3.799081 | 0.024863 | 3647098  |
| THS1        | 3.798406 | 2.21E-09 | 3647882  |
| C4_04980W_A | 3.79642  | 0.029166 | 3641167  |
| BET2        | 3.78926  | 0.000764 | 3639025  |
| DAK2        | 3.7853   | 1.29E-09 | 3634895  |
| C1_09070W_A | 3.780526 | 1.56E-05 | 3634773  |
| TLO1        | 3.773943 | 0.000151 | 3639677  |
| CSA1        | 3.773755 | 2.77E-07 | 3638009  |
| C6_02490C_A | 3.767172 | 0.000972 | 3639171  |
| RCK2        | 3.759158 | 1.44E-08 | 3643507  |
| YHM2        | 3.756415 | 3.34E-05 | 3647137  |
| RPS4A       | 3.75226  | 2.61E-09 | 3641247  |
| TIP1        | 3.746488 | 0.00522  | 3636512  |
| C2_10470C_A | 3.739362 | 0.000222 | 3641196  |
| C7_01740C_A | 3.735914 | 0.010711 | 3637010  |
| YPT72       | 3.730405 | 0.000819 | 3643523  |
| CR_02570C_A | 3.725871 | 0.006134 | 3647685  |
| COQ6        | 3.725703 | 1.21E-06 | 3636878  |
| C1_11920W_A | 3.723107 | 0.000149 | 3642003  |
| ERV1        | 3.722706 | 0.012526 | 30515385 |
| CR_09510C_A | 3.718582 | 5.35E-05 | 3647105  |
| MED20       | 3.716479 | 0.026857 | 30515250 |
| SNG3        | 3.715989 | 0.00198  | 3646715  |
| C2_00730C_A | 3.714478 | 0.000884 | 3638913  |
| ARC1        | 3.713175 | 3.58E-08 | 3645108  |
| C5_03400C_A | 3.709467 | 0.009008 | 30515308 |
| C4_02470C_A | 3.707083 | 1.94E-06 | 3637869  |
| C1_08660C_A | 3.704048 | 0.029196 | 3634931  |
| C2_00880W_A | 3.700457 | 0.001921 | 3638897  |

|             |          |          |          |
|-------------|----------|----------|----------|
| PMT6        | 3.694695 | 6.03E-06 | 3641116  |
| CR_01070W_A | 3.693822 | 0.067295 | 3640382  |
| CDC50       | 3.693412 | 0.000563 | 3640302  |
| CHS8        | 3.690719 | 1.26E-06 | 3640532  |
| MNN24       | 3.689339 | 0.000136 | 3638789  |
| URA5        | 3.686915 | 0.001503 | 3640087  |
| C6_04250W_A | 3.679997 | 3.62E-08 | 30515345 |
| C2_02950W_A | 3.675702 | 4.33E-05 | 3643012  |
| KSR1        | 3.673992 | 0.012754 | 3646052  |
| C1_01210W_A | 3.673771 | 0.012633 | 3640209  |
| RPP2B       | 3.673728 | 2.53E-07 | 3635195  |
| MSH2        | 3.66911  | 8.11E-05 | 3642939  |
| CR_07780W_A | 3.667162 | 6.54E-05 | 3647352  |
| MPT5        | 3.664488 | 0.000327 | 3636205  |
| C2_03290W_A | 3.66258  | 0.002208 | 3637429  |
| DPS1-1      | 3.662083 | 9.61E-09 | 3645134  |
| C7_03160W_A | 3.658124 | 4.83E-06 | 3641345  |
| EFT2        | 3.654489 | 1.75E-10 | 3642998  |
| C3_05550C_A | 3.646172 | 0.000673 | 3643659  |
| C2_08200W_A | 3.642934 | 0.003074 | 3648342  |
| C5_01440C_A | 3.641763 | 0.014128 | 3647043  |
| C2_09970C_A | 3.637506 | 6.43E-06 | 3643820  |
| C7_01460C_A | 3.637454 | 0.02884  | 3636958  |
| ATC1        | 3.636418 | 4.66E-07 | 3639570  |
| C3_06410C_A | 3.635222 | 0.029186 | 3642261  |
| C3_04800C_A | 3.633897 | 0.000162 | 3635216  |
| RPL11       | 3.628115 | 5.57E-07 | 3643489  |
| ZRT2        | 3.625316 | 0.000525 | 3635861  |
| CYC1        | 3.621439 | 2.08E-06 | 3643937  |
| C3_01900C_A | 3.618585 | 0.003961 | 3636559  |
| C1_13260W_A | 3.617375 | 0.000165 | 30515074 |
| PRO3        | 3.610474 | 1.53E-06 | 3645036  |
| STE24       | 3.607919 | 4.26E-06 | 3645040  |
| C1_08050W_A | 3.605464 | 3.36E-06 | 3640709  |
| CSH1        | 3.6024   | 0.000209 | 3646427  |
| C4_04230W_A | 3.596364 | 0.031119 | 3646857  |
| C4_06940C_A | 3.592489 | 0.007206 | 3642928  |
| SPE1        | 3.588007 | 2E-06    | 3639327  |
| C2_06110W_A | 3.582587 | 9.4E-05  | 3644094  |
| PKH2        | 3.581673 | 4.7E-07  | 3642058  |
| RPS21       | 3.580468 | 1.07E-09 | 3640242  |
| GCV3        | 3.576153 | 2.32E-08 | 3636194  |
| C7_00410C_A | 3.575138 | 0.001513 | 3638033  |
| SUR7        | 3.571597 | 5.53E-08 | 3641610  |
| CR_07370W_A | 3.569751 | 0.00184  | 3646053  |
| MSM1        | 3.567683 | 0.034058 | 3636398  |
| C2_08620W_A | 3.566245 | 4.15E-06 | 3643912  |

|             |          |          |          |
|-------------|----------|----------|----------|
| CR_01820W_A | 3.565505 | 1.34E-06 | 3640164  |
| C6_00910C_A | 3.561318 | 1.25E-07 | 3644030  |
| CDC24       | 3.560837 | 6.93E-05 | 3643737  |
| CR_00350W_A | 3.551928 | 6.24E-07 | 3639686  |
| LTP1        | 3.54924  | 0.000578 | 3640760  |
| C1_06480C_A | 3.548362 | 0.001613 | 30515008 |
| DPP3        | 3.545335 | 0.016889 | 3636942  |
| ZCF39       | 3.543958 | 6.06E-08 | 3639037  |
| C1_10690W_A | 3.543819 | 0.009303 | 3644443  |
| CR_01430W_A | 3.542037 | 0.037066 | 3640138  |
| PLD1        | 3.541658 | 7.58E-09 | 3645329  |
| OCA1        | 3.540632 | 0.007449 | 3643929  |
| C2_00830C_A | 3.539496 | 2.23E-06 | 3638808  |
| C6_00760W_A | 3.537615 | 7.77E-05 | 3647080  |
| FRS1        | 3.537092 | 5.94E-08 | 3640121  |
| CR_08050C_A | 3.536733 | 5.84E-06 | 3644133  |
| RAD7        | 3.532291 | 0.000828 | 3635833  |
| PCK1        | 3.532053 | 3.09E-07 | 3639701  |
| CR_02410W_A | 3.530893 | 0.000954 | 3644928  |
| RHO1        | 3.520112 | 1.9E-06  | 3642564  |
| DAO1        | 3.516713 | 5.09E-05 | 3636885  |
| C7_03660C_A | 3.515835 | 7.45E-08 | 3646226  |
| C2_09760W_A | 3.513593 | 0.0325   | 3643807  |
| CR_05480W_A | 3.513257 | 1.56E-06 | 3648238  |
| YPD1        | 3.510288 | 0.000141 | 3644458  |
| SER2        | 3.508777 | 0.00132  | 3643006  |
| C4_04390W_A | 3.505198 | 2.33E-07 | 30515267 |
| ILV1        | 3.497688 | 5.45E-06 | 3646918  |
| TAF14       | 3.490952 | 9.38E-07 | 3637357  |
| SEC62       | 3.490582 | 0.000763 | 3636860  |
| RPL2        | 3.488    | 3E-09    | 30515049 |
| ERG7        | 3.47695  | 1.63E-06 | 3635761  |
| TPM2        | 3.463702 | 1.76E-08 | 30515441 |
| TOM70       | 3.459765 | 3.86E-06 | 3647645  |
| RPS5        | 3.45377  | 7.48E-08 | 3637700  |
| C2_07100W_A | 3.452099 | 4.83E-06 | 3643504  |
| C3_01910C_A | 3.44955  | 0.000243 | 30515182 |
| LYS21       | 3.448996 | 5.96E-06 | 3644763  |
| RPL25       | 3.446974 | 6.11E-08 | 30515338 |
| C1_05720W_A | 3.446578 | 1.36E-08 | 30515000 |
| SEC24       | 3.436669 | 1.46E-07 | 3634939  |
| C4_04330C_A | 3.435872 | 9.58E-07 | 3646840  |
| ARH2        | 3.42532  | 0.001696 | 3643411  |
| C7_02080W_A | 3.422608 | 0.019878 | 3637025  |
| IDP2        | 3.422345 | 6.06E-06 | 3644934  |
| FGR34       | 3.421452 | 0.000314 | 3639033  |
| C1_08780W_A | 3.41164  | 5.97E-05 | 3634789  |

|             |          |          |          |
|-------------|----------|----------|----------|
| PGI1        | 3.410834 | 5.02E-09 | 3644847  |
| WBP1        | 3.407076 | 2.02E-06 | 3644398  |
| C4_07240W_A | 3.397752 | 0.000794 | 3642945  |
| BUB2        | 3.396079 | 0.085358 | 3643030  |
| C5_01420W_A | 3.395195 | 0.000845 | 3647055  |
| PFY1        | 3.394346 | 1.22E-06 | 3640703  |
| RPS6A       | 3.393747 | 3.42E-08 | 3635701  |
| OCA6        | 3.392126 | 0.037995 | 3643336  |
| CTA24       | 3.389604 | 1.72E-06 | 3636475  |
| C2_05800C_A | 3.388256 | 0.000426 | 3645584  |
| C6_03880W_A | 3.383004 | 6.76E-06 | 3640293  |
| RPN7        | 3.381411 | 8.06E-08 | 3641909  |
| C7_04280C_A | 3.377739 | 0.000135 | 3643173  |
| MSI3        | 3.377126 | 5.54E-08 | 3639821  |
| C1_07780W_A | 3.373855 | 0.000244 | 3647955  |
| RNA1        | 3.373659 | 8.42E-06 | 3636595  |
| CR_05750W_A | 3.369767 | 1.48E-07 | 3646696  |
| PNP1        | 3.368778 | 5.12E-05 | 3638426  |
| ASR2        | 3.36718  | 4.86E-08 | 3641907  |
| C2_02090W_A | 3.366693 | 0.006003 | 3635854  |
| CTA7        | 3.361841 | 0.000142 | 3637776  |
| C3_04630W_A | 3.361808 | 0.007469 | 3635189  |
| C1_06200W_A | 3.348214 | 0.000984 | 3648300  |
| C4_05080C_A | 3.33982  | 0.010635 | 3641129  |
| C1_02320C_A | 3.337994 | 1.26E-06 | 3644572  |
| FLC2        | 3.336579 | 1.73E-07 | 3647962  |
| ATP16       | 3.335138 | 1.21E-07 | 3638963  |
| YDC1        | 3.331511 | 0.0014   | 3642962  |
| LPD1        | 3.331129 | 2.59E-08 | 3646037  |
| CR_07700W_A | 3.330587 | 0.001462 | 3648195  |
| C3_04360W_A | 3.32699  | 0.000117 | 3635276  |
| C4_05850C_A | 3.326485 | 0.003313 | 3641791  |
| CAK1        | 3.323578 | 0.006592 | 3637352  |
| CYS4        | 3.323463 | 6.26E-08 | 3645429  |
| HGT7        | 3.316587 | 3.15E-09 | 3638876  |
| C1_13320C_A | 3.313585 | 2.15E-05 | 3636149  |
| CDC54       | 3.312477 | 0.046825 | 3647606  |
| RPL4B       | 3.310956 | 1.68E-09 | 3643347  |
| VAM3        | 3.310933 | 0.044664 | 3635146  |
| RPL16A      | 3.304252 | 8.53E-08 | 3639338  |
| C7_01930C_A | 3.297231 | 0.00346  | 3637027  |
| GUS1        | 3.290358 | 4.98E-07 | 3638029  |
| WH11        | 3.281778 | 8.45E-05 | 30515117 |
| APS3        | 3.279583 | 0.012261 | 3646491  |
| THI6        | 3.277897 | 0.003495 | 3638333  |
| CR_04730W_A | 3.270788 | 0.048514 | 3647305  |
| RPL32       | 3.268913 | 6.92E-07 | 30515335 |

|             |          |          |          |
|-------------|----------|----------|----------|
| C6_01420C_A | 3.259617 | 1.48E-05 | 3641602  |
| PLC1        | 3.256842 | 0.00319  | 3647860  |
| C4_05860W_A | 3.256047 | 0.003956 | 3641792  |
| C7_03050W_A | 3.256047 | 0.003958 | 3641378  |
| CR_04500C_A | 3.254641 | 0.003585 | 3641014  |
| C1_02060W_A | 3.253492 | 0.004263 | 30514968 |
| ARC15       | 3.247678 | 0.002252 | 3646043  |
| ERG27       | 3.243112 | 0.000643 | 3640432  |
| C1_10320W_A | 3.242574 | 0.004605 | 3634907  |
| GTT11       | 3.240905 | 0.0007   | 3645644  |
| C1_00320W_A | 3.240631 | 0.003855 | 3639297  |
| CR_04020C_A | 3.239609 | 0.008339 | 3640969  |
| TOM40       | 3.235929 | 5.18E-07 | 3636968  |
| CR_01280C_A | 3.232545 | 0.026337 | 3640400  |
| C5_04150C_A | 3.229732 | 0.048425 | 3636525  |
| CR_08920W_A | 3.229366 | 0.001026 | 3641911  |
| MUQ1        | 3.228865 | 6.95E-05 | 3638898  |
| MNN21       | 3.226883 | 0.000246 | 3648124  |
| CNB1        | 3.226404 | 0.002157 | 3636463  |
| PEX7        | 3.217779 | 0.000363 | 3644027  |
| KRE5        | 3.213178 | 0.000315 | 3638384  |
| C1_02370C_A | 3.212249 | 0.016902 | 3644576  |
| C1_00630W_A | 3.212211 | 0.012995 | 3639380  |
| AMN1        | 3.20945  | 0.00699  | 3635795  |
| C3_01940C_A | 3.20822  | 0.003895 | 3636600  |
| BRN1        | 3.207037 | 0.006495 | 3641815  |
| C3_03080W_A | 3.197662 | 0.008964 | 3638397  |
| C5_00280C_A | 3.195959 | 0.002423 | 3641581  |
| C3_03410C_A | 3.194977 | 9.52E-07 | 3638353  |
| KGD1        | 3.194708 | 1.59E-07 | 3647752  |
| C2_10700C_A | 3.194401 | 0.000351 | 3641207  |
| CR_07570W_A | 3.193407 | 0.003922 | 3648004  |
| C4_00410W_A | 3.190955 | 0.00367  | 3645019  |
| C1_06890C_A | 3.189397 | 1.05E-06 | 30515014 |
| C2_00400C_A | 3.188389 | 3.17E-06 | 3638821  |
| CDC20       | 3.185867 | 0.002577 | 3644057  |
| RBF1        | 3.185442 | 0.00107  | 3639251  |
| NUP159      | 3.18531  | 2.49E-07 | 3647458  |
| C2_00870W_A | 3.184447 | 0.013272 | 3638804  |
| RPD31       | 3.178408 | 5.89E-06 | 3638520  |
| CR_05880W_A | 3.178199 | 0.029891 | 3646702  |
| PXA2        | 3.177556 | 0.000113 | 3642055  |
| C4_01910W_A | 3.168856 | 0.005648 | 3635635  |
| FGR29       | 3.15931  | 0.013557 | 3641190  |
| C1_02430C_A | 3.156165 | 1.86E-05 | 3636846  |
| MNN2        | 3.153347 | 0.002726 | 3644405  |
| RPL15A      | 3.153339 | 2.16E-08 | 3641025  |



|             |          |          |          |
|-------------|----------|----------|----------|
| C2_01390W_A | 3.152792 | 1.02E-05 | 3635726  |
| C5_01540W_A | 3.15278  | 6.85E-07 | 30515301 |
| GAL4        | 3.145353 | 2.31E-05 | 3641244  |
| C4_03110W_A | 3.145093 | 5.78E-07 | 3637924  |
| PEX3        | 3.14311  | 0.001918 | 3644484  |
| C4_02720C_A | 3.133483 | 0.000476 | 3637857  |
| RHO3        | 3.130774 | 0.005785 | 3643448  |
| ADE17       | 3.130072 | 8.91E-08 | 3641024  |
| PMR1        | 3.126437 | 1.56E-05 | 3638043  |
| FOX3        | 3.125536 | 0.000161 | 3636629  |
| C3_03840C_A | 3.124989 | 0.001634 | 3645628  |
| CAT8        | 3.122091 | 0.022345 | 3640745  |
| SAM4        | 3.119238 | 0.000247 | 3646506  |
| C1_10460W_A | 3.117114 | 0.000449 | 3647183  |
| C1_02040C_A | 3.114025 | 6.81E-07 | 3644586  |
| SFH5        | 3.109683 | 0.005962 | 3634884  |
| C2_04370W_A | 3.109333 | 0.000152 | 3645460  |
| C4_01830C_A | 3.102724 | 0.00052  | 3635593  |
| SEC3        | 3.101258 | 5.75E-05 | 3642806  |
| DLD1        | 3.100797 | 0.000209 | 3643025  |
| C4_03720C_A | 3.096938 | 0.002809 | 3645359  |
| C3_01720C_A | 3.092851 | 8.05E-07 | 3636601  |
| ATP20       | 3.088392 | 0.000427 | 3647602  |
| RBK1        | 3.087825 | 0.001613 | 3646830  |
| HYM1        | 3.087208 | 0.000469 | 3637355  |
| PPH21       | 3.082837 | 9.93E-06 | 3636665  |
| AKR1        | 3.081755 | 4.37E-06 | 3636166  |
| C6_03580W_A | 3.074944 | 0.033298 | 3640250  |
| C1_10410W_A | 3.072768 | 0.006397 | 3634840  |
| STE23       | 3.072536 | 0.000277 | 3639236  |
| ISC1        | 3.068456 | 0.047479 | 3646705  |
| YBL053      | 3.059137 | 0.024462 | 3647045  |
| COQ5        | 3.056621 | 0.000516 | 3643416  |
| C3_06350W_A | 3.056456 | 0.000474 | 30515215 |
| SEC10       | 3.056427 | 2.06E-05 | 3642961  |
| MAE1        | 3.053469 | 3.3E-05  | 3641615  |
| C2_00510W_A | 3.050046 | 0.000943 | 3638868  |
| RPB11       | 3.044876 | 0.035519 | 30514957 |
| SET3        | 3.043204 | 1.03E-05 | 3643320  |
| C4_05640C_A | 3.042784 | 0.019957 | 3641813  |
| C4_00320C_A | 3.040844 | 0.005102 | 3644999  |
| LAG1        | 3.032881 | 0.018501 | 3640383  |
| C1_01000C_A | 3.03199  | 0.018862 | 3640180  |
| UBA1        | 3.027938 | 6.53E-07 | 3642286  |
| C7_00420C_A | 3.027152 | 0.005447 | 3638032  |
| C3_01210C_A | 3.027107 | 0.000355 | 3636612  |
| C1_06670W_A | 3.025106 | 5.3E-05  | 3639541  |

|             |          |          |          |
|-------------|----------|----------|----------|
| YKU80       | 3.016921 | 0.008108 | 3645138  |
| YCG1        | 3.015795 | 0.002591 | 3636639  |
| CR_07600W_A | 3.015243 | 0.002198 | 3644849  |
| PPE1        | 3.013709 | 0.037741 | 3635802  |
| C3_01280W_A | 3.011952 | 0.003493 | 3636623  |
| C2_09620W_A | 2.99534  | 0.004312 | 3643797  |
| C3_01140W_A | 2.988167 | 0.015101 | 3639902  |
| YVC1        | 2.984122 | 7.71E-05 | 3642303  |
| LYS2        | 2.977979 | 8.68E-07 | 3636875  |
| RPL27A      | 2.972314 | 5.41E-06 | 30515062 |
| C2_07390C_A | 2.971217 | 2.06E-05 | 3645229  |
| RPS21B      | 2.971079 | 2.26E-06 | 30514961 |
| CR_01380W_A | 2.96741  | 0.000606 | 3640131  |
| ERG1        | 2.965366 | 2.09E-06 | 3646509  |
| PGA33       | 2.9649   | 0.004982 | 3637350  |
| C2_04410W_A | 2.962673 | 0.008864 | 3645455  |
| CR_09070C_A | 2.960733 | 0.000686 | 3641926  |
| RAV2        | 2.960576 | 0.013868 | 3639252  |
| C1_12140W_A | 2.957727 | 0.023154 | 3642050  |
| C3_06690C_A | 2.955933 | 0.024324 | 3642256  |
| C2_02930C_A | 2.953754 | 2.46E-05 | 3643015  |
| CR_04080C_A | 2.952827 | 8.34E-06 | 3641023  |
| C1_10500W_A | 2.952463 | 0.026342 | 3647188  |
| C6_03820C_A | 2.950293 | 0.000662 | 3640288  |
| PRE2        | 2.947765 | 6.98E-06 | 3643490  |
| CCP1        | 2.946338 | 3.57E-06 | 3638350  |
| CR_09750C_A | 2.937202 | 0.000497 | 3639009  |
| PIKA        | 2.93437  | 0.000552 | 3643765  |
| C3_01180C_A | 2.930273 | 0.0002   | 3647960  |
| APG7        | 2.929679 | 0.026463 | 3646615  |
| RPS20       | 2.927931 | 2.52E-06 | 3642071  |
| C2_07080C_A | 2.92757  | 0.029737 | 3643502  |
| NUO2        | 2.921966 | 8.77E-06 | 3638381  |
| VMA4        | 2.91528  | 3.65E-05 | 3640111  |
| IFK2        | 2.915276 | 0.013626 | 3637439  |
| CR_04560C_A | 2.915175 | 0.014027 | 3640946  |
| C7_00120W_A | 2.915055 | 0.005279 | 3637976  |
| POL2        | 2.914919 | 0.000741 | 3645733  |
| RDI1        | 2.908801 | 2.43E-05 | 3635167  |
| C1_14170W_A | 2.906942 | 2.52E-05 | 3643323  |
| HOG1        | 2.905987 | 1.56E-05 | 3637393  |
| C4_06240W_A | 2.90412  | 0.02833  | 3642807  |
| PEP3        | 2.899453 | 0.003518 | 3639267  |
| C1_11100W_A | 2.894866 | 0.014224 | 3644414  |
| C2_04170C_A | 2.893219 | 9.1E-06  | 30515111 |
| SWC4        | 2.891548 | 0.00045  | 3639679  |
| KIP2        | 2.890161 | 0.047484 | 3643954  |

|             |          |          |          |
|-------------|----------|----------|----------|
| C3_05410W_A | 2.89012  | 2.58E-06 | 3643665  |
| ADP1        | 2.889479 | 4.15E-05 | 3642458  |
| C5_02060W_A | 2.888281 | 0.045989 | 3643748  |
| TRP3        | 2.888259 | 0.007084 | 3642035  |
| C4_03810W_A | 2.888163 | 0.010842 | 3645350  |
| MNN26       | 2.88769  | 0.00784  | 3646240  |
| C6_00920W_A | 2.885206 | 0.000932 | 3644031  |
| MRP2        | 2.881909 | 0.002855 | 3636498  |
| AIP2        | 2.877053 | 9.24E-06 | 3638393  |
| C7_01480W_A | 2.875012 | 0.015331 | 3636956  |
| ZCF32       | 2.873059 | 0.015974 | 3635213  |
| ADE12       | 2.871562 | 1.18E-06 | 3634869  |
| C7_00380W_A | 2.871104 | 0.023128 | 3638036  |
| RPL14       | 2.868383 | 2.41E-06 | 30515072 |
| COX7        | 2.866055 | 0.000528 | 3638339  |
| PTC7        | 2.862764 | 4.2E-05  | 3645000  |
| SEC34       | 2.861241 | 0.000751 | 3644455  |
| HAM1        | 2.857411 | 0.005263 | 3647224  |
| C4_02100C_A | 2.854572 | 0.017253 | 3635641  |
| SEC61       | 2.85047  | 1.75E-06 | 3647462  |
| C5_02050W_A | 2.84619  | 4.46E-05 | 3643768  |
| PHB2        | 2.842031 | 3.11E-05 | 3635238  |
| IFD3        | 2.837813 | 0.002509 | 3640211  |
| BUD7        | 2.835784 | 3.86E-05 | 3647228  |
| C2_09930W_A | 2.835625 | 0.002086 | 3643824  |
| C1_14050C_A | 2.83307  | 0.000547 | 3643343  |
| ADE2        | 2.831325 | 1.24E-06 | 3635259  |
| C3_04130W_A | 2.828222 | 0.000492 | 3635283  |
| C1_03430W_A | 2.825236 | 0.002501 | 3636906  |
| PEP1        | 2.824036 | 3.04E-06 | 3647612  |
| C3_06610W_A | 2.815454 | 0.014679 | 3642248  |
| C5_00750C_A | 2.81511  | 0.000668 | 3644121  |
| C1_02490C_A | 2.813498 | 0.005971 | 3636853  |
| ARO9        | 2.805316 | 0.034795 | 3641773  |
| C1_00920W_A | 2.796011 | 0.001553 | 3639283  |
| C5_02900W_A | 2.794995 | 0.001522 | 3637747  |
| ALG9        | 2.792449 | 0.002755 | 3644457  |
| CDC55       | 2.792061 | 5.84E-06 | 3635785  |
| C7_02170C_A | 2.790296 | 0.000904 | 3636993  |
| STE13       | 2.788092 | 0.019749 | 3647597  |
| C4_02040W_A | 2.787254 | 0.019445 | 3635649  |
| CR_07170W_A | 2.786722 | 0.013651 | 3645271  |
| C5_05440C_A | 2.785316 | 9.82E-06 | 3636431  |
| C6_04120C_A | 2.784618 | 0.009569 | 3647974  |
| ANT1        | 2.782418 | 0.004532 | 3639516  |
| VPS35       | 2.773687 | 0.00017  | 3645567  |
| C2_07630C_A | 2.773548 | 3.69E-06 | 3645193  |

|             |          |          |          |
|-------------|----------|----------|----------|
| C1_01490W_A | 2.770204 | 9.06E-07 | 3640226  |
| C4_01020C_A | 2.768522 | 3.6E-06  | 3635606  |
| C1_02830W_A | 2.762806 | 0.007787 | 3636876  |
| CR_08130W_A | 2.76044  | 0.008527 | 3642070  |
| C2_02840C_A | 2.750528 | 0.003247 | 3642976  |
| GAD1        | 2.746896 | 0.000112 | 3645339  |
| HOM2        | 2.741336 | 2.24E-05 | 3635826  |
| BTS1        | 2.728473 | 0.039927 | 3646982  |
| C1_01900C_A | 2.727511 | 0.002158 | 3645426  |
| SEC4        | 2.722688 | 5.42E-05 | 3640119  |
| PKH3        | 2.722609 | 6.86E-05 | 3646075  |
| RAS1        | 2.721531 | 2.1E-06  | 3643927  |
| PGA52       | 2.719656 | 8.97E-06 | 3647908  |
| RPS18       | 2.717289 | 1.21E-05 | 3637953  |
| FAA2-3      | 2.715986 | 0.00372  | 3643125  |
| C4_04650W_A | 2.715945 | 0.044354 | 3641152  |
| C1_08490W_A | 2.7105   | 0.000883 | 3646492  |
| C7_02670W_A | 2.709112 | 0.02555  | 3647651  |
| GIM5        | 2.707005 | 0.025483 | 3639886  |
| CR_03020C_A | 2.700824 | 0.01349  | 3642598  |
| CR_08560C_A | 2.700071 | 0.000627 | 3642142  |
| CR_08620C_A | 2.69415  | 0.009033 | 3642110  |
| C1_03510C_A | 2.692845 | 1.11E-05 | 3636916  |
| C1_07630W_A | 2.688007 | 0.009776 | 3646660  |
| C3_05010C_A | 2.687054 | 0.011896 | 3635169  |
| APA2        | 2.684451 | 0.000166 | 3639234  |
| CDC7        | 2.682668 | 0.023895 | 3643424  |
| SCL1        | 2.682212 | 0.000102 | 3640510  |
| RPN8        | 2.678861 | 3.36E-05 | 3643770  |
| C6_04060W_A | 2.673602 | 0.001335 | 3647828  |
| RIM20       | 2.673375 | 3.59E-05 | 3634809  |
| C3_06970W_A | 2.671178 | 0.003965 | 3638506  |
| SRV2        | 2.669026 | 8.6E-06  | 3640938  |
| C2_03900C_A | 2.668709 | 3.87E-05 | 3637395  |
| C7_03840W_A | 2.667077 | 0.00958  | 3643146  |
| URA4        | 2.667065 | 0.001453 | 3642632  |
| C4_04720W_A | 2.663376 | 0.000219 | 3641137  |
| C1_13190W_A | 2.662752 | 4.34E-06 | 3636163  |
| GUA1        | 2.657238 | 4.61E-05 | 3634763  |
| C6_02410W_A | 2.654473 | 0.000736 | 3645884  |
| C7_03260C_A | 2.65271  | 0.046621 | 3641366  |
| AHA1        | 2.652142 | 0.001211 | 3638933  |
| RPS22A      | 2.64506  | 8.83E-05 | 3639551  |
| C2_05220C_A | 2.643415 | 0.000731 | 3643466  |
| C7_01160C_A | 2.641136 | 0.016541 | 30515351 |
| FGR17       | 2.639792 | 0.025971 | 3640296  |
| ERG20       | 2.639327 | 0.000166 | 3645440  |

|             |          |          |          |
|-------------|----------|----------|----------|
| MDL1        | 2.636826 | 0.001143 | 3640146  |
| C7_02780W_A | 2.633207 | 9.2E-06  | 3641361  |
| C3_00050C_A | 2.631199 | 0.010415 | 3640570  |
| CR_06560C_A | 2.629067 | 0.00154  | 3648367  |
| HEM2        | 2.628258 | 0.002392 | 3637428  |
| SMC4        | 2.624822 | 0.000654 | 3641578  |
| MED18       | 2.62443  | 0.015696 | 3644103  |
| C3_00470W_A | 2.624198 | 0.003024 | 3640520  |
| C7_00250C_A | 2.623933 | 0.001433 | 3637979  |
| C3_07820W_A | 2.623656 | 0.030689 | 3647463  |
| CR_01700C_A | 2.617543 | 0.004422 | 3640129  |
| C1_04640W_A | 2.613821 | 0.001277 | 3644761  |
| NPL3        | 2.613433 | 5.58E-06 | 3643310  |
| C7_02370W_A | 2.611227 | 8.09E-06 | 3636930  |
| CR_09150W_A | 2.610071 | 0.021572 | 3641880  |
| SRO77       | 2.609067 | 0.000112 | 3646088  |
| KEM1        | 2.604211 | 2.27E-05 | 3636222  |
| C4_01780C_A | 2.603947 | 0.005193 | 3635582  |
| C3_05150W_A | 2.5999   | 0.000138 | 3635162  |
| ARP8        | 2.597074 | 9.27E-06 | 3640200  |
| C1_06720C_A | 2.597024 | 0.011671 | 3639509  |
| C3_02120W_A | 2.594592 | 0.001303 | 3636658  |
| SCT2        | 2.593016 | 0.000123 | 3643018  |
| PGA49       | 2.592273 | 0.019043 | 3646525  |
| GBP2        | 2.591581 | 1.56E-05 | 3637992  |
| RAD16       | 2.589443 | 0.000137 | 3636874  |
| C1_07690C_A | 2.589143 | 0.001555 | 3641767  |
| CR_06820W_A | 2.586807 | 0.024907 | 3647325  |
| VPS52       | 2.584517 | 0.007992 | 3638996  |
| C6_00890W_A | 2.580543 | 1.3E-05  | 3644028  |
| SMP2        | 2.579622 | 6.55E-06 | 3635779  |
| CR_09990W_A | 2.577623 | 0.001455 | 3638930  |
| RPN6        | 2.573168 | 0.000125 | 3645352  |
| NOP10       | 2.572325 | 0.014807 | 30515434 |
| CYP5        | 2.570767 | 1.23E-05 | 3642257  |
| C2_09650W_A | 2.570229 | 0.00027  | 3643794  |
| C1_01300W_A | 2.568828 | 0.000124 | 3640185  |
| VPS11       | 2.568648 | 0.000536 | 3646524  |
| RPL23A      | 2.566013 | 4.01E-05 | 3647558  |
| CRG1        | 2.561731 | 0.00029  | 3646393  |
| ALG2        | 2.55969  | 0.00721  | 3647832  |
| CHC1        | 2.557964 | 2.76E-05 | 3647552  |
| PRC3        | 2.557316 | 0.000293 | 3639889  |
| C1_02680C_A | 2.553009 | 0.027778 | 3636822  |
| CDC47       | 2.541887 | 0.002262 | 3645780  |
| CR_05860W_A | 2.541563 | 0.007208 | 3646703  |
| C7_02470C_A | 2.539555 | 0.013597 | 3636945  |

|             |          |          |          |
|-------------|----------|----------|----------|
| RCY1        | 2.536007 | 0.024623 | 3643731  |
| C5_02750C_A | 2.535948 | 0.002298 | 3637740  |
| RPN2        | 2.531661 | 2.71E-05 | 3642027  |
| C2_01870C_A | 2.525655 | 0.02058  | 3635836  |
| PXA1        | 2.525168 | 1.33E-05 | 3639713  |
| CR_08000C_A | 2.52346  | 0.000117 | 3644150  |
| RIB4        | 2.523105 | 3.22E-05 | 30514995 |
| VAS1        | 2.522468 | 3.53E-05 | 3648340  |
| C1_10820C_A | 2.521161 | 0.000184 | 3644435  |
| COX8        | 2.519493 | 3.96E-05 | 30515130 |
| C1_11890W_A | 2.514738 | 0.003625 | 3642006  |
| C2_08380C_A | 2.509597 | 0.038696 | 3648253  |
| MRPL6       | 2.509182 | 0.024482 | 3639724  |
| AAT22       | 2.508663 | 0.040531 | 3635651  |
| RPL12       | 2.50806  | 3.95E-05 | 3636659  |
| C1_13280C_A | 2.492515 | 0.022281 | 3636145  |
| UBP13       | 2.490365 | 0.00043  | 3638879  |
| RBP1        | 2.4849   | 6.69E-05 | 3647647  |
| C5_03490C_A | 2.475073 | 0.000129 | 3646967  |
| RCT1        | 2.474717 | 1.02E-05 | 3641727  |
| C5_04900C_A | 2.465399 | 0.004697 | 3636416  |
| C2_02700C_A | 2.463975 | 0.027582 | 3643005  |
| C6_00190W_A | 2.463915 | 0.00797  | 3646080  |
| MDM10       | 2.463405 | 0.028603 | 3647778  |
| RPL42       | 2.463099 | 0.000172 | 30515041 |
| UBC15       | 2.460482 | 0.025684 | 3641260  |
| C3_01570W_A | 2.458067 | 0.02652  | 3636668  |
| CR_10510W_A | 2.45781  | 0.004395 | 3639039  |
| SSO2        | 2.457189 | 0.000966 | 3643809  |
| RPS23A      | 2.455572 | 8.23E-05 | 3639515  |
| CR_10600C_A | 2.452579 | 0.000152 | 3639004  |
| GLK4        | 2.449055 | 7.49E-05 | 3646046  |
| GPI7        | 2.444845 | 0.048888 | 3647672  |
| C1_09610W_A | 2.440823 | 0.003527 | 3634891  |
| SLA1        | 2.432947 | 6.33E-05 | 3635739  |
| C3_06710W_A | 2.430998 | 0.000424 | 3638448  |
| MAC1        | 2.429153 | 0.015976 | 3637985  |
| C2_01170C_A | 2.429046 | 0.002148 | 3638860  |
| CR_03860C_A | 2.418678 | 0.002578 | 3643186  |
| C3_03760W_A | 2.416464 | 0.003159 | 3645638  |
| SEC72       | 2.415993 | 0.021435 | 3645768  |
| C2_07810W_A | 2.408725 | 0.007816 | 3642324  |
| C1_14180W_A | 2.406406 | 0.017692 | 3643324  |
| ASC1        | 2.398784 | 6.49E-05 | 3645907  |
| C7_00190W_A | 2.396703 | 0.00451  | 3637969  |
| KRS1        | 2.3959   | 8.81E-05 | 3638486  |
| C5_01350W_A | 2.395533 | 0.003273 | 3642640  |

|             |          |          |         |
|-------------|----------|----------|---------|
| C6_03040C_A | 2.394206 | 0.028631 | 3639269 |
| C1_11600W_A | 2.393694 | 0.028638 | 3645346 |
| C2_04490W_A | 2.391905 | 0.00303  | 3645463 |
| HAT2        | 2.390658 | 0.003222 | 3645973 |
| PHM7        | 2.387006 | 0.000103 | 3642329 |
| C6_00240C_A | 2.385279 | 0.011401 | 3646062 |
| ALA1        | 2.3827   | 9.71E-05 | 3640285 |
| C1_03690W_A | 2.379688 | 0.000572 | 3648426 |
| KEL1        | 2.378594 | 0.000206 | 3639318 |
| C1_11850W_A | 2.367947 | 4.06E-05 | 3642010 |
| C5_02690W_A | 2.36689  | 0.004542 | 3637775 |
| C2_05020W_A | 2.365269 | 0.080676 | 3643447 |
| C5_00580W_A | 2.359794 | 0.003898 | 3641588 |
| RPG1A       | 2.356664 | 8.31E-05 | 3646816 |
| C7_00140C_A | 2.352993 | 0.016037 | 3637974 |
| C1_12170C_A | 2.345719 | 0.018025 | 3642039 |
| POB3        | 2.342409 | 6.89E-05 | 3635827 |
| TUF1        | 2.340644 | 0.000113 | 3639360 |
| C6_01370W_A | 2.337912 | 0.015875 | 3641607 |
| C6_02280W_A | 2.33786  | 0.021099 | 3645872 |
| GAT1        | 2.335742 | 0.019287 | 3641794 |
| C1_04560W_A | 2.333752 | 0.027674 | 3646130 |
| C1_04580C_A | 2.332114 | 0.041056 | 3646132 |
| CR_06620W_A | 2.331245 | 0.014183 | 3646631 |
| C5_04960W_A | 2.324337 | 0.00013  | 3636423 |
| C5_01890W_A | 2.323363 | 0.011846 | 3643750 |
| C7_03030W_A | 2.3154   | 0.019902 | 3641380 |
| CDC60       | 2.30498  | 0.000152 | 3640128 |
| RBD1        | 2.304979 | 0.00356  | 3642018 |
| C1_03790C_A | 2.302005 | 0.000292 | 3644682 |
| IRR1        | 2.301679 | 0.008303 | 3643305 |
| C1_05390C_A | 2.300145 | 0.003688 | 3642479 |
| SLC1        | 2.299892 | 0.01491  | 3638324 |
| RPN1        | 2.296617 | 9.14E-05 | 3636147 |
| EBP7        | 2.296557 | 0.019911 | 3642971 |
| C4_00230W_A | 2.296028 | 0.041348 | 3645034 |
| YBP1        | 2.294396 | 0.00503  | 3636187 |
| GIT2        | 2.293948 | 0.016373 | 3642633 |
| CR_08990C_A | 2.29287  | 0.000297 | 3641891 |
| CR_10590W_A | 2.292382 | 0.004042 | 3639003 |
| OXR1        | 2.292357 | 0.008406 | 3638372 |
| C5_02230W_A | 2.288961 | 0.000174 | 3637708 |
| C5_00790C_A | 2.286177 | 0.000149 | 3644125 |
| C6_04340W_A | 2.2854   | 0.02012  | 3646291 |
| C6_02630C_A | 2.284877 | 0.004564 | 3639221 |
| SRB9        | 2.28369  | 0.000705 | 3635845 |
| PDS5        | 2.283634 | 0.012433 | 3642341 |

|             |          |          |          |
|-------------|----------|----------|----------|
| CR_00290W_A | 2.283513 | 0.000745 | 3639717  |
| C6_00560W_A | 2.281888 | 0.005376 | 3647143  |
| C7_04310C_A | 2.273739 | 0.008251 | 3643141  |
| C1_14500C_A | 2.272886 | 0.000256 | 3643331  |
| C2_07190C_A | 2.271774 | 0.010321 | 3643513  |
| C1_11010C_A | 2.268064 | 0.014091 | 3644421  |
| ARO8        | 2.264606 | 0.00091  | 3638828  |
| MSK1        | 2.264456 | 0.040598 | 3637032  |
| C1_09360C_A | 2.261582 | 0.000262 | 3634807  |
| C4_00780C_A | 2.261474 | 0.002377 | 3645759  |
| NMT1        | 2.258241 | 0.002921 | 3635624  |
| C1_12830C_A | 2.253884 | 0.001409 | 3636176  |
| C7_01650W_A | 2.253027 | 0.000226 | 3636984  |
| C1_14530W_A | 2.252178 | 0.013532 | 3643333  |
| TLO34       | 2.250107 | 0.022379 | 3648392  |
| UGA2        | 2.248015 | 0.00055  | 3645436  |
| URA2        | 2.247725 | 0.000241 | 3645728  |
| BCY1        | 2.247233 | 0.000185 | 3638832  |
| C2_08270C_A | 2.241639 | 0.013326 | 3642347  |
| VPS4        | 2.240563 | 0.003238 | 3637703  |
| RPL21A      | 2.238891 | 0.000396 | 3637400  |
| ALS2        | 2.234465 | 0.001316 | 3645724  |
| C3_07480W_A | 2.233765 | 0.005839 | 3638529  |
| C1_10680C_A | 2.232642 | 0.000425 | 3647678  |
| C5_01940W_A | 2.229495 | 0.004009 | 3643740  |
| C2_09600C_A | 2.224411 | 0.035576 | 3643799  |
| RPS24       | 2.220066 | 0.001052 | 3640568  |
| C2_03910C_A | 2.216661 | 0.032992 | 3637426  |
| FAT1        | 2.212525 | 0.007331 | 3647083  |
| C6_02740W_A | 2.209416 | 0.011833 | 3639216  |
| C7_02480W_A | 2.209082 | 0.03833  | 3636944  |
| C1_14090W_A | 2.208659 | 0.011984 | 30515079 |
| NAT2        | 2.200404 | 0.008646 | 3638837  |
| NHX1        | 2.199802 | 0.001507 | 3647141  |
| TIF         | 2.197968 | 0.000127 | 3640190  |
| PEX4        | 2.196796 | 0.002456 | 3636429  |
| BNI4        | 2.194218 | 0.006245 | 3646406  |
| RPL10       | 2.194015 | 0.000334 | 3636850  |
| PGA14       | 2.19325  | 0.000258 | 3641560  |
| PRO2        | 2.192178 | 0.020977 | 3638532  |
| SES1        | 2.189834 | 0.000378 | 3638415  |
| OCH1        | 2.187863 | 0.006856 | 3641751  |
| TIP20       | 2.185746 | 0.007347 | 3636457  |
| CDC53       | 2.185688 | 0.00062  | 3636603  |
| C2_00570W_A | 2.181093 | 0.002254 | 3638853  |
| LMO1        | 2.173453 | 0.006288 | 3641403  |
| RNR21       | 2.169672 | 0.000228 | 3643021  |



|             |          |          |          |
|-------------|----------|----------|----------|
| C4_03920W_A | 2.166543 | 0.028108 | 3648314  |
| MP65        | 2.166142 | 9.38E-05 | 3643951  |
| VTC3        | 2.164663 | 0.001164 | 3643206  |
| ROB1        | 2.163969 | 0.000851 | 3636212  |
| C4_03600C_A | 2.163772 | 0.00325  | 3645366  |
| RPL29       | 2.160572 | 0.000671 | 30515048 |
| RBT5        | 2.159695 | 0.000205 | 3645007  |
| C2_01900C_A | 2.150463 | 0.009146 | 3635789  |
| C1_00410C_A | 2.148618 | 0.016315 | 3639287  |
| INO4        | 2.147809 | 0.046567 | 30515105 |
| ADH1        | 2.145808 | 0.000387 | 3636489  |
| C6_00430C_A | 2.144056 | 0.005928 | 3646089  |
| CR_04230W_A | 2.143584 | 0.019396 | 3640944  |
| FOX2        | 2.14037  | 0.000885 | 3648327  |
| NSP1        | 2.140094 | 0.000275 | 3637430  |
| C6_03310W_A | 2.139352 | 0.035435 | 3639197  |
| HPC2        | 2.136889 | 0.018469 | 3636188  |
| GRE2        | 2.13591  | 0.010131 | 3648026  |
| C2_03360W_A | 2.12994  | 0.000542 | 3637389  |
| C5_03550W_A | 2.128704 | 0.000529 | 3646973  |
| RCE1        | 2.127907 | 0.038559 | 3641104  |
| LCB4        | 2.12443  | 0.049988 | 3642057  |
| C4_05340W_A | 2.123846 | 0.042739 | 3646947  |
| URA6        | 2.122485 | 0.004846 | 3647988  |
| GLX3        | 2.12239  | 0.006528 | 3638325  |
| INT1        | 2.121336 | 0.002053 | 3637761  |
| C3_00830C_A | 2.11953  | 0.009564 | 3647757  |
| USO1        | 2.118283 | 0.001065 | 3648280  |
| AAT21       | 2.116614 | 0.001294 | 3647241  |
| RPS25B      | 2.115656 | 0.001989 | 3646972  |
| UBC4        | 2.112027 | 0.000486 | 3638927  |
| CR_09620C_A | 2.107281 | 0.017056 | 6335435  |
| NAT5        | 2.100995 | 0.02851  | 3641022  |
| TRY5        | 2.100745 | 0.045069 | 3641619  |
| RVB2        | 2.098795 | 0.000668 | 3637055  |
| CR_08170C_A | 2.09536  | 0.030466 | 3642073  |
| C3_01950C_A | 2.095227 | 0.007318 | 3636599  |
| CMD1        | 2.093833 | 0.000566 | 3646520  |
| C3_07740W_A | 2.093025 | 0.001973 | 3638453  |
| RPL39       | 2.092658 | 0.000692 | 30515109 |
| C5_04470C_A | 2.086796 | 0.00079  | 3636414  |
| C2_04330C_A | 2.084197 | 0.032551 | 3645453  |
| C1_02000W_A | 2.078329 | 0.010832 | 3645418  |
| C6_02370C_A | 2.077146 | 0.008636 | 3645882  |
| ZUO1        | 2.06865  | 0.001303 | 3637908  |
| COQ4        | 2.06438  | 0.007447 | 3636804  |
| C4_03320W_A | 2.062616 | 0.033052 | 3648092  |

|             |          |          |         |
|-------------|----------|----------|---------|
| ACP1        | 2.061519 | 0.013596 | 3639825 |
| CR_09500C_A | 2.06014  | 0.026812 | 3641897 |
| STP1        | 2.057547 | 0.017139 | 3635152 |
| C1_08680C_A | 2.05689  | 0.037458 | 3634933 |
| C1_10280C_A | 2.055667 | 0.003122 | 3634902 |
| CR_07080W_A | 2.053764 | 0.002311 | 3647964 |
| KEX2        | 2.041583 | 0.009754 | 3634914 |
| PTC4        | 2.041419 | 0.011791 | 3646697 |
| TIF5        | 2.040476 | 0.013886 | 3637765 |
| CR_07840C_A | 2.03548  | 0.033372 | 3647346 |
| POX1-3      | 2.035178 | 0.002924 | 3636598 |
| APR1        | 2.0315   | 0.000809 | 3645204 |
| C3_00890C_A | 2.026902 | 0.038979 | 3647753 |
| C5_03140C_A | 2.026388 | 0.000781 | 3637798 |
| C2_10460C_A | 2.025915 | 0.00882  | 3641195 |
| CR_03600C_A | 2.025272 | 0.012005 | 3643207 |
| TIP41       | 2.024499 | 0.032484 | 3636506 |
| DBP5        | 2.023781 | 0.004437 | 3636564 |
| GOR1        | 2.022555 | 0.039642 | 3636836 |
| GPA2        | 2.016448 | 0.022326 | 3636638 |
| SKI8        | 2.014892 | 0.010656 | 3640294 |
| PSD2        | 2.013251 | 0.004198 | 3636515 |
| REV3        | 2.013221 | 0.046159 | 3641749 |
| RPT4        | 2.005125 | 0.000577 | 3640966 |
| C1_06190C_A | 2.000529 | 0.014113 | 3648391 |
| C4_02950C_A | 1.999918 | 0.340362 | 3637874 |
| C1_12920C_A | 1.999099 | 0.045504 | 3636155 |
| CR_09190C_A | 1.998805 | 0.049585 | 3641885 |
| C3_03210W_A | 1.996191 | 0.131177 | 3638315 |
| C5_03880C_A | 1.995248 | 0.337182 | 3647222 |
| EMP70       | 1.993997 | 0.013712 | 3637919 |
| MRE11       | 1.990768 | 0.029383 | 3645898 |
| C1_04470C_A | 1.989891 | 0.159852 | 3646142 |
| GCN4        | 1.987451 | 0.000825 | 3643823 |
| C3_03930W_A | 1.986809 | 0.012409 | 3645657 |
| HGT5        | 1.986766 | 0.016377 | 3635201 |
| CYT2        | 1.983618 | 0.219035 | 3635671 |
| CCT5        | 1.982837 | 0.001128 | 3643478 |
| C2_08340C_A | 1.973904 | 0.137009 | 3648165 |
| MKK2        | 1.968446 | 0.010724 | 3645580 |
| C3_07030C_A | 1.968332 | 0.020804 | 3638517 |
| C1_12930C_A | 1.967166 | 0.472982 | 3636156 |
| CR_06690C_A | 1.966348 | 0.020881 | 3646624 |
| C1_06360W_A | 1.966077 | 0.075654 | 3639561 |
| C6_01490C_A | 1.963611 | 0.172592 | 3641620 |
| C3_05110W_A | 1.963379 | 0.053669 | 3635158 |
| UME1        | 1.961    | 0.002676 | 3643101 |

|             |          |          |          |
|-------------|----------|----------|----------|
| FGR50       | 1.955656 | 0.085171 | 3644859  |
| C6_00850W_A | 1.95468  | 0.005793 | 3644010  |
| C1_04980C_A | 1.95329  | 0.019476 | 3647529  |
| BIG1        | 1.952565 | 0.054434 | 3644434  |
| SNO1        | 1.946173 | 0.043446 | 3636812  |
| PGK1        | 1.944757 | 0.00162  | 3647081  |
| C1_09750W_A | 1.944434 | 0.071342 | 3634822  |
| C5_03980W_A | 1.943631 | 0.003869 | 3647442  |
| ECM15       | 1.94264  | 0.072851 | 30515218 |
| TLG2        | 1.941647 | 0.095401 | 3635773  |
| MEC1        | 1.940961 | 0.017335 | 3647733  |
| C1_12060C_A | 1.936515 | 0.354267 | 3642026  |
| C5_04300C_A | 1.936497 | 0.001645 | 3636456  |
| CR_05960W_A | 1.936159 | 0.353776 | 30515417 |
| CPH1        | 1.935344 | 0.197752 | 3644468  |
| IST1        | 1.931261 | 0.140692 | 3640587  |
| CR_05890C_A | 1.928299 | 0.02617  | 3646682  |
| BMT3        | 1.927302 | 0.087189 | 3640439  |
| C4_04180C_A | 1.925384 | 0.24679  | 3641183  |
| C1_09470C_A | 1.922927 | 0.033758 | 3634761  |
| NCP1        | 1.920839 | 0.00153  | 3637839  |
| C4_02680C_A | 1.920779 | 0.343056 | 3637828  |
| RPS28B      | 1.920002 | 0.003646 | 30515349 |
| HRT1        | 1.916932 | 0.079317 | 30515187 |
| C3_01890C_A | 1.915134 | 0.001572 | 3636561  |
| CR_01120C_A | 1.914648 | 0.019702 | 3640434  |
| TPK2        | 1.914642 | 0.001624 | 3643482  |
| C1_13030C_A | 1.913275 | 0.00389  | 3636122  |
| C2_07610C_A | 1.912979 | 0.004807 | 3645195  |
| C3_06680C_A | 1.91241  | 0.194977 | 3642255  |
| ALS3        | 1.912006 | 0.002286 | 3647965  |
| CR_02120C_A | 1.910814 | 0.155678 | 3640143  |
| SHE9        | 1.910728 | 0.029536 | 3642984  |
| C7_00920C_A | 1.908571 | 0.067255 | 3637957  |
| ESC4        | 1.904362 | 0.380036 | 3635727  |
| C1_05780W_A | 1.902277 | 0.012754 | 3639888  |
| ZCF10       | 1.900952 | 0.050235 | 3643485  |
| SSC1        | 1.899357 | 0.001382 | 3645232  |
| C7_04210C_A | 1.899272 | 0.003124 | 3643121  |
| C4_06470W_A | 1.899011 | 0.037395 | 3642790  |
| C1_01940C_A | 1.898945 | 0.110783 | 3645422  |
| IML2        | 1.892987 | 0.003877 | 3643302  |
| WRS1        | 1.892551 | 0.014796 | 3642060  |
| C3_03830W_A | 1.890923 | 0.058381 | 3645630  |
| C5_02450W_A | 1.887833 | 0.021044 | 3637729  |
| C2_02360C_A | 1.887642 | 0.197003 | 3635824  |
| CZF1        | 1.885005 | 0.007594 | 3642915  |

|             |          |          |          |
|-------------|----------|----------|----------|
| HMO1        | 1.883525 | 0.003822 | 3646685  |
| ARF2        | 1.883011 | 0.002445 | 3635271  |
| MYO5        | 1.880317 | 0.003297 | 3647404  |
| CR_09640C_A | 1.877759 | 0.064977 | 30515456 |
| C4_00210W_A | 1.877498 | 0.378764 | 3645032  |
| C2_00630C_A | 1.877419 | 0.384202 | 3638848  |
| C1_02240W_A | 1.876967 | 0.005811 | 3644597  |
| C1_09000W_A | 1.876832 | 0.09683  | 3634915  |
| C3_01680C_A | 1.873488 | 0.023523 | 3636605  |
| C4_04620C_A | 1.873008 | 0.13102  | 3641155  |
| C3_07330W_A | 1.8707   | 0.335764 | 3638478  |
| TIM21       | 1.866832 | 0.063029 | 3644573  |
| LHP1        | 1.866059 | 0.031235 | 3646665  |
| C1_09810W_A | 1.86514  | 0.051528 | 3634845  |
| DIT1        | 1.864979 | 0.508626 | 3648147  |
| UME7        | 1.864714 | 0.506665 | 3637918  |
| MCA1        | 1.864154 | 0.00317  | 3635233  |
| C1_08390C_A | 1.862977 | 0.015405 | 3646504  |
| CTA1        | 1.86241  | 0.039148 | 3641631  |
| C2_04180C_A | 1.861991 | 0.107492 | 3637330  |
| C5_05260W_A | 1.861967 | 0.208898 | 3636473  |
| C6_02960W_A | 1.861158 | 0.272821 | 3639189  |
| C2_09710C_A | 1.859692 | 0.003682 | 3643786  |
| LYS142      | 1.85822  | 0.025729 | 3634896  |
| YCS4        | 1.85526  | 0.02116  | 3645196  |
| CDC14       | 1.853068 | 0.020965 | 3647132  |
| SWD2        | 1.851246 | 0.092253 | 3646677  |
| C5_04790C_A | 1.850345 | 0.407352 | 3636446  |
| C3_07460W_A | 1.850274 | 0.064636 | 3638480  |
| C3_06490W_A | 1.848732 | 0.005394 | 3642285  |
| LPT1        | 1.848232 | 0.009598 | 3645212  |
| C2_05570C_A | 1.845395 | 0.07437  | 3645562  |
| C2_07200W_A | 1.845239 | 0.18311  | 3643481  |
| C1_04910C_A | 1.845238 | 0.025453 | 3644793  |
| C2_00110W_A | 1.845155 | 0.111894 | 3647921  |
| SBP1        | 1.843257 | 0.004847 | 3635280  |
| MAD2        | 1.842797 | 0.3293   | 3644696  |
| ABP2        | 1.842613 | 0.333361 | 3643443  |
| C6_01330C_A | 1.84198  | 0.325953 | 3641643  |
| C3_06550C_A | 1.841074 | 0.064049 | 3642275  |
| C1_13060C_A | 1.841017 | 0.008372 | 3636123  |
| HDA1        | 1.840638 | 0.031384 | 3640154  |
| CR_00830W_A | 1.840353 | 0.197038 | 3640412  |
| C3_07140C_A | 1.840338 | 0.234538 | 3638439  |
| MIR1        | 1.839914 | 0.004634 | 3634782  |
| C1_12740W_A | 1.839848 | 0.081901 | 3646819  |
| CR_05120W_A | 1.83923  | 0.010996 | 3646402  |

|             |          |          |          |
|-------------|----------|----------|----------|
| C4_06740C_A | 1.839021 | 0.004775 | 3642923  |
| C5_01980C_A | 1.83771  | 0.097915 | 3643775  |
| C1_12660W_A | 1.836683 | 0.137967 | 3646835  |
| CR_01670W_A | 1.836665 | 0.228866 | 3640124  |
| TEA1        | 1.835999 | 0.02704  | 3643671  |
| C7_01190W_A | 1.834265 | 0.150787 | 3645902  |
| UGA11       | 1.833886 | 0.148617 | 3637437  |
| C2_01220W_A | 1.831288 | 0.012222 | 3638856  |
| C2_05410W_A | 1.831148 | 0.005885 | 30515120 |
| DBF4        | 1.826855 | 0.075599 | 3641388  |
| MET3        | 1.826039 | 0.033321 | 3636132  |
| LYS14       | 1.824538 | 0.200751 | 3639217  |
| C6_02580W_A | 1.823817 | 0.076333 | 3639207  |
| C5_02520W_A | 1.823335 | 0.27291  | 3637768  |
| CR_05330W_A | 1.823079 | 0.272939 | 30515404 |
| MMS22       | 1.822384 | 0.277627 | 3639681  |
| C4_02780W_A | 1.82114  | 0.009056 | 3637902  |
| C2_08540C_A | 1.820072 | 0.407078 | 3643920  |
| CDC6        | 1.819814 | 0.40328  | 3642034  |
| CR_02060W_A | 1.817673 | 0.110561 | 3640155  |
| C2_05050C_A | 1.815318 | 0.154029 | 3643450  |
| C2_10670W_A | 1.814718 | 0.00208  | 3641251  |
| C3_02770C_A | 1.814134 | 0.030351 | 3638414  |
| TRP1        | 1.811583 | 0.033181 | 3639321  |
| CR_01260W_A | 1.809864 | 0.149683 | 3640402  |
| MED16       | 1.807218 | 0.031814 | 3646725  |
| C7_03370C_A | 1.806765 | 0.022939 | 3646720  |
| C2_01920C_A | 1.805408 | 0.016003 | 3635792  |
| CR_05970C_A | 1.805359 | 0.036094 | 3642502  |
| C3_06810W_A | 1.803852 | 0.062814 | 3638545  |
| ADE4        | 1.80124  | 0.006984 | 3641769  |
| CR_08980C_A | 1.80007  | 0.109665 | 3641890  |
| C3_00610W_A | 1.797743 | 0.166993 | 3640578  |
| RPL9B       | 1.796963 | 0.004583 | 3638348  |
| C2_00920W_A | 1.796478 | 0.100969 | 3638893  |
| RAD32       | 1.79555  | 0.076382 | 3637340  |
| YRB1        | 1.795307 | 0.010082 | 3639663  |
| C4_01670C_A | 1.794745 | 0.108234 | 3635711  |
| C6_04110W_A | 1.792484 | 0.008513 | 3647834  |
| C7_00580C_A | 1.79189  | 0.156546 | 3637995  |
| C1_10960W_A | 1.791635 | 0.204253 | 30515047 |
| C2_00320W_A | 1.791374 | 0.070237 | 3638798  |
| C1_14200W_A | 1.791043 | 0.039959 | 3643301  |
| C1_12070C_A | 1.790748 | 0.221986 | 3642025  |
| AGO1        | 1.789804 | 0.03476  | 3642828  |
| CSH3        | 1.787807 | 0.012361 | 3646798  |
| C2_02870W_A | 1.787582 | 0.122756 | 3642972  |

|             |          |          |          |
|-------------|----------|----------|----------|
| C1_14030W_A | 1.78708  | 0.03836  | 3643340  |
| C6_02940C_A | 1.78571  | 0.037219 | 3639187  |
| C2_08390W_A | 1.78457  | 0.006685 | 3648252  |
| MET14       | 1.78401  | 0.185782 | 3641547  |
| C6_03990C_A | 1.780818 | 0.268889 | 3640271  |
| VPH1        | 1.779083 | 0.004849 | 3646157  |
| RPN3        | 1.778804 | 0.005533 | 3636917  |
| CDC27       | 1.773771 | 0.120275 | 3640405  |
| TYS1        | 1.773627 | 0.003621 | 3637870  |
| AGP2        | 1.772964 | 0.007119 | 3635684  |
| DCW1        | 1.772411 | 0.009405 | 3638842  |
| DDI1        | 1.77096  | 0.015111 | 3643295  |
| C1_07050C_A | 1.770696 | 0.083876 | 3639532  |
| C1_03470C_A | 1.770211 | 0.758169 | 3636912  |
| C1_14020W_A | 1.770211 | 0.758336 | 3643339  |
| C7_02210W_A | 1.770065 | 0.755917 | 3636990  |
| CR_04400W_A | 1.770065 | 0.755917 | 30515393 |
| C3_02070C_A | 1.769919 | 0.756301 | 3636576  |
| C4_00730C_A | 1.769919 | 0.756373 | 3645765  |
| C7_01380W_A | 1.769919 | 0.756638 | 3645891  |
| RNY11       | 1.769919 | 0.756774 | 3636408  |
| ZCF4        | 1.769919 | 0.756206 | 3641799  |
| C6_00080C_A | 1.769741 | 0.19138  | 3647899  |
| VRP1        | 1.767481 | 0.010664 | 3642293  |
| SWI4        | 1.766744 | 0.061846 | 3645408  |
| C1_00310W_A | 1.766619 | 0.026692 | 3639298  |
| C4_06170C_A | 1.76477  | 0.040707 | 3642818  |
| CR_00490W_A | 1.764487 | 0.03848  | 3639723  |
| C1_01400C_A | 1.76368  | 0.033988 | 3640237  |
| C1_01220C_A | 1.763266 | 0.037582 | 3640210  |
| C6_03110C_A | 1.762501 | 0.553606 | 3639278  |
| C4_05000W_A | 1.762463 | 0.549796 | 3641149  |
| C2_01040W_A | 1.762174 | 0.54909  | 30515085 |
| C2_01570W_A | 1.762174 | 0.549323 | 3635782  |
| CTF18       | 1.762042 | 0.104522 | 3640431  |
| EFH1        | 1.761886 | 0.556165 | 3646929  |
| ZCF26       | 1.761479 | 0.429053 | 3635666  |
| C2_10730W_A | 1.760943 | 0.429071 | 3641210  |
| C4_02160C_A | 1.759124 | 0.028852 | 3635668  |
| GRP2        | 1.758948 | 0.015082 | 3637744  |
| C1_12430W_A | 1.758702 | 0.06129  | 3642013  |
| CHS5        | 1.757859 | 0.003904 | 3637333  |
| PEX19       | 1.756846 | 0.021663 | 3642108  |
| ACE2        | 1.756629 | 0.042905 | 3646034  |
| C3_00010C_A | 1.756355 | 0.049234 | 3640600  |
| C3_01310W_A | 1.756123 | 0.269064 | 3636620  |
| CST20       | 1.753875 | 0.044039 | 3637790  |

|             |          |          |          |
|-------------|----------|----------|----------|
| SIN3        | 1.753583 | 0.005768 | 3639282  |
| C2_10720C_A | 1.753177 | 0.04842  | 3641209  |
| QCR9        | 1.749939 | 0.051711 | 30515251 |
| C1_04970W_A | 1.748525 | 0.013088 | 3647528  |
| MSO1        | 1.74769  | 0.033068 | 3642040  |
| VPS2        | 1.745668 | 0.055263 | 3641546  |
| RPS27       | 1.74533  | 0.006306 | 30515429 |
| GGA2        | 1.744866 | 0.008488 | 3636928  |
| C1_12120W_A | 1.742056 | 0.200853 | 3642053  |
| AGE1        | 1.741659 | 0.091479 | 3636913  |
| MCM1        | 1.741572 | 0.044768 | 3638050  |
| C6_02160W_A | 1.734789 | 0.266727 | 3645889  |
| CR_05460W_A | 1.73308  | 0.099744 | 3648237  |
| ZCF19       | 1.731829 | 0.573656 | 3644869  |
| AYR2        | 1.731571 | 0.041572 | 3639184  |
| PEX2        | 1.730986 | 0.039458 | 3643460  |
| URA1        | 1.730346 | 0.006401 | 3634819  |
| C1_08690W_A | 1.729782 | 0.086973 | 3634934  |
| C3_00960W_A | 1.728783 | 0.18655  | 3639853  |
| VPS16       | 1.727972 | 0.043476 | 3646150  |
| ASH1        | 1.726778 | 0.081536 | 3641249  |
| RAM2        | 1.725706 | 0.095466 | 3634767  |
| VPS33       | 1.72418  | 0.111505 | 3647477  |
| MID1        | 1.721714 | 0.097827 | 3647441  |
| C1_00790W_A | 1.720141 | 0.376534 | 3639348  |
| C7_01670W_A | 1.720037 | 0.379907 | 3636982  |
| C3_06540C_A | 1.71941  | 0.381402 | 3642274  |
| C1_00510W_A | 1.719354 | 0.051498 | 3639311  |
| PCT1        | 1.718016 | 0.020983 | 3645743  |
| DFG10       | 1.714641 | 0.294878 | 3645786  |
| GPH1        | 1.714466 | 0.037448 | 3637956  |
| C3_01220W_A | 1.71349  | 0.200056 | 3636610  |
| ANP1        | 1.713096 | 0.128203 | 3643917  |
| RPL30       | 1.712687 | 0.025249 | 30515273 |
| C1_11250W_A | 1.712611 | 0.12724  | 3644556  |
| C5_01110W_A | 1.711459 | 0.047373 | 3642623  |
| PSY2        | 1.711449 | 0.189819 | 3644567  |
| CCT2        | 1.709674 | 0.020936 | 3643815  |
| STB5        | 1.707748 | 0.048424 | 3640208  |
| ROT2        | 1.705698 | 0.02266  | 3641566  |
| FAV3        | 1.705661 | 0.223412 | 3647911  |
| CR_10120C_A | 1.702346 | 0.461937 | 3638969  |
| IPL1        | 1.699029 | 0.267562 | 3645876  |
| C1_14040W_A | 1.698712 | 0.053098 | 3643342  |
| SGT1        | 1.697913 | 0.012734 | 3644068  |
| C4_00170W_A | 1.6968   | 0.023205 | 3645028  |
| VPS41       | 1.695946 | 0.092544 | 3634800  |

|             |          |          |          |
|-------------|----------|----------|----------|
| C2_02000W_A | 1.695673 | 0.022192 | 3635767  |
| HYS2        | 1.695083 | 0.144386 | 3636441  |
| SWD3        | 1.694945 | 0.259941 | 3645890  |
| YAE1        | 1.692923 | 0.209723 | 3637941  |
| SEC1        | 1.690691 | 0.047279 | 3636935  |
| C1_04860W_A | 1.685619 | 0.01802  | 3644784  |
| C5_04920C_A | 1.684323 | 0.015362 | 3636419  |
| RAD6        | 1.682982 | 0.132472 | 3643143  |
| RDH54       | 1.682975 | 0.10216  | 3641231  |
| STT4        | 1.681366 | 0.008926 | 3647963  |
| CR_07220C_A | 1.681066 | 0.154421 | 3646040  |
| C4_06950W_A | 1.679015 | 0.399602 | 3642927  |
| C1_05900W_A | 1.678175 | 0.084511 | 3639866  |
| PHO88       | 1.673865 | 0.089383 | 3641898  |
| C6_00250W_A | 1.673668 | 0.020615 | 3646063  |
| ALT1        | 1.673342 | 0.068668 | 3638307  |
| BMT8        | 1.673122 | 0.125495 | 3637442  |
| C1_13810W_A | 1.671714 | 0.083622 | 3636126  |
| SEC5        | 1.671256 | 0.048698 | 3648178  |
| SSZ1        | 1.670159 | 0.019567 | 3641139  |
| C3_01790C_A | 1.668534 | 0.105146 | 3636587  |
| MGM101      | 1.667718 | 0.121736 | 3636820  |
| CR_04460C_A | 1.667589 | 0.237264 | 3640988  |
| MRPL19      | 1.665664 | 0.207377 | 3639497  |
| C4_04870C_A | 1.663313 | 0.011034 | 3641160  |
| C4_03730C_A | 1.662784 | 0.209998 | 3645358  |
| MGE1        | 1.662469 | 0.028686 | 3640133  |
| C1_06710W_A | 1.661662 | 0.117744 | 3639510  |
| C2_01960C_A | 1.659939 | 0.596369 | 3635796  |
| C2_04450W_A | 1.659939 | 0.596284 | 3645467  |
| C2_07770C_A | 1.659803 | 0.594344 | 30515144 |
| C6_02300C_A | 1.659803 | 0.593963 | 3645874  |
| PHO112      | 1.659431 | 0.596005 | 3644929  |
| C4_04750W_A | 1.658711 | 0.057796 | 3641133  |
| SNF4        | 1.658037 | 0.025248 | 3640264  |
| C1_10630C_A | 1.65793  | 0.381454 | 3647683  |
| FDH3        | 1.655973 | 0.012693 | 3638923  |
| C2_10630W_A | 1.655915 | 0.105549 | 3641248  |
| ARP4        | 1.654074 | 0.083029 | 3639201  |
| C4_05630W_A | 1.653871 | 0.048679 | 3641812  |
| RPS19A      | 1.653549 | 0.025101 | 30515208 |
| PUP3        | 1.653365 | 0.035616 | 3646718  |
| RPS9B       | 1.653315 | 0.015132 | 30515104 |
| C1_05950C_A | 1.653122 | 0.158653 | 3639859  |
| CRK1        | 1.649838 | 0.05859  | 3643414  |
| C7_04060W_A | 1.644738 | 0.487142 | 3643156  |
| GUT2        | 1.641198 | 0.014792 | 3642921  |



|             |          |          |          |
|-------------|----------|----------|----------|
| ALG7        | 1.641095 | 0.163996 | 3642291  |
| TCP1        | 1.640348 | 0.025905 | 3646499  |
| ULP1        | 1.638663 | 0.159243 | 3638314  |
| PRT1        | 1.638327 | 0.023724 | 3636959  |
| SMI1B       | 1.637905 | 0.42689  | 3643675  |
| C1_02210W_A | 1.637    | 0.042285 | 3644594  |
| C2_08690C_A | 1.635892 | 0.389216 | 3643888  |
| PGA59       | 1.635122 | 0.011098 | 3637881  |
| C3_03060W_A | 1.634445 | 0.39087  | 3638395  |
| AQY1        | 1.632578 | 0.174222 | 3642587  |
| KIN2        | 1.630047 | 0.017555 | 3639697  |
| C5_05150C_A | 1.629675 | 0.216864 | 3636461  |
| C2_05590C_A | 1.628752 | 0.174327 | 3645564  |
| UBP6        | 1.627684 | 0.016715 | 3639317  |
| SFI1        | 1.626541 | 0.102631 | 3641385  |
| TIM10       | 1.626358 | 0.153656 | 30515247 |
| NIP1        | 1.625839 | 0.013799 | 3635618  |
| C4_06020C_A | 1.622981 | 0.110369 | 3646519  |
| COX13       | 1.622601 | 0.020137 | 3635784  |
| C7_04010W_A | 1.622078 | 0.022591 | 3643112  |
| SUP35       | 1.621845 | 0.022202 | 3643785  |
| URE2        | 1.620858 | 0.111865 | 3647795  |
| MCM3        | 1.620469 | 0.123834 | 3645223  |
| C5_03100C_A | 1.620329 | 0.098991 | 3637704  |
| C2_02620W_A | 1.619658 | 0.098669 | 3635838  |
| PRE1        | 1.618882 | 0.028821 | 3636500  |
| C1_06390W_A | 1.618051 | 0.178993 | 3639558  |
| C2_04300C_A | 1.616517 | 0.184204 | 3648276  |
| NRG1        | 1.613871 | 0.026131 | 3643166  |
| PUP1        | 1.613827 | 0.017256 | 3638936  |
| ATM1        | 1.612339 | 0.103347 | 3646284  |
| DTD2        | 1.611829 | 0.081144 | 3638390  |
| PKC1        | 1.611791 | 0.019843 | 3635210  |
| SIW14       | 1.611712 | 0.268247 | 3647323  |
| TDH3        | 1.610474 | 0.024986 | 3638540  |
| C1_03370W_A | 1.610355 | 0.018385 | 3636891  |
| SAL6        | 1.610293 | 0.040388 | 3640289  |
| C7_00210C_A | 1.609437 | 0.141867 | 3637983  |
| RIM11       | 1.60931  | 0.038208 | 3648277  |
| C4_06690C_A | 1.607812 | 0.068747 | 30515285 |
| CR_06260W_A | 1.605434 | 0.181028 | 3644853  |
| C3_06800C_A | 1.605129 | 0.177274 | 3638497  |
| C5_02500C_A | 1.604108 | 0.073057 | 3637766  |
| TOA2        | 1.602385 | 0.184557 | 3635710  |
| C2_07290W_A | 1.60209  | 0.026375 | 3643476  |
| C2_00290W_A | 1.601858 | 0.251743 | 3638801  |
| C4_01950W_A | 1.601476 | 0.070615 | 3635665  |

|             |          |          |          |
|-------------|----------|----------|----------|
| C3_05120C_A | 1.599322 | 0.107407 | 3635159  |
| C7_02510W_A | 1.599239 | 0.19659  | 30515357 |
| CR_08930C_A | 1.59857  | 0.074775 | 3641913  |
| C1_14520W_A | 1.595471 | 0.041014 | 3643332  |
| LKH1        | 1.594967 | 0.017871 | 3647187  |
| C7_02560W_A | 1.591004 | 0.116877 | 3637016  |
| CR_05980W_A | 1.588677 | 0.028948 | 3642501  |
| GAR1        | 1.588577 | 0.056911 | 3645332  |
| CR_01350C_A | 1.588499 | 0.028339 | 3640166  |
| TLO13       | 1.588489 | 0.321772 | 3647891  |
| ABP140      | 1.588236 | 0.325852 | 3644592  |
| PRE10       | 1.587175 | 0.036088 | 3636957  |
| C4_00940W_A | 1.586399 | 0.521984 | 3635677  |
| PDK2        | 1.58637  | 0.026319 | 3641876  |
| CR_06930W_A | 1.585854 | 0.241856 | 3648382  |
| FOL1        | 1.585351 | 0.138784 | 3644123  |
| TIM22       | 1.581636 | 0.0873   | 3648168  |
| UBP1        | 1.581198 | 0.062187 | 3641760  |
| C6_02680W_A | 1.580515 | 0.179538 | 3639226  |
| ACF2        | 1.580299 | 0.115753 | 3641613  |
| TIM44       | 1.580025 | 0.031263 | 3640529  |
| TIF34       | 1.57934  | 0.031415 | 3636872  |
| TAF60       | 1.574247 | 0.079177 | 3642252  |
| C7_02920W_A | 1.573735 | 0.418651 | 3641391  |
| C2_05760C_A | 1.573596 | 0.096991 | 3645578  |
| TRM1        | 1.573297 | 0.145148 | 3640396  |
| NUP82       | 1.568361 | 0.029741 | 3640261  |
| C1_13690C_A | 1.568115 | 0.055356 | 30515076 |
| OPT6        | 1.567205 | 0.296948 | 3635603  |
| C1_08520C_A | 1.566044 | 0.311191 | 3646495  |
| C1_10620W_A | 1.565238 | 0.042477 | 3647682  |
| C3_00660W_A | 1.564272 | 0.122361 | 3640538  |
| C2_09070C_A | 1.563785 | 0.150141 | 3644111  |
| ISN1        | 1.560247 | 0.033675 | 3640196  |
| C1_08110W_A | 1.559816 | 0.044304 | 3640716  |
| CR_04720C_A | 1.558892 | 0.0469   | 3648140  |
| C6_00210W_A | 1.557857 | 0.08568  | 3646060  |
| C2_02660W_A | 1.557472 | 0.307638 | 3643009  |
| C4_03300C_A | 1.557408 | 0.646809 | 30515254 |
| C2_09850C_A | 1.557314 | 0.646921 | 3643782  |
| IHD2        | 1.557041 | 0.307177 | 3639359  |
| EMC9        | 1.55429  | 0.02623  | 3647918  |
| SAM2        | 1.553248 | 0.087539 | 3644538  |
| SAS3        | 1.552916 | 0.172177 | 3640073  |
| NCE103      | 1.552459 | 0.227925 | 3636621  |
| CHS7        | 1.552403 | 0.169241 | 3639869  |
| VTI1        | 1.551818 | 0.091122 | 3638352  |

|             |          |          |          |
|-------------|----------|----------|----------|
| C3_01620W_A | 1.550806 | 0.445412 | 3636663  |
| C2_05710C_A | 1.550721 | 0.04109  | 30515127 |
| NCB2        | 1.548302 | 0.152991 | 3643028  |
| C6_00500C_A | 1.548254 | 0.286312 | 3647149  |
| COI1        | 1.548076 | 0.099264 | 3640721  |
| C7_02630W_A | 1.547594 | 0.194597 | 3647646  |
| NGG1        | 1.547365 | 0.090374 | 3636902  |
| C3_05090C_A | 1.546311 | 0.103557 | 3635245  |
| C7_00310C_A | 1.546309 | 0.253714 | 3638045  |
| RHR2        | 1.545759 | 0.073769 | 3640522  |
| C7_00790W_A | 1.545337 | 0.160239 | 3637943  |
| PAP1        | 1.545317 | 0.096736 | 3643763  |
| C2_00350W_A | 1.544291 | 0.164608 | 3638827  |
| C1_06560W_A | 1.54346  | 0.160917 | 3639517  |
| RUB1        | 1.541253 | 0.361278 | 30515194 |
| SAC7        | 1.539425 | 0.082468 | 3638010  |
| SPE2        | 1.53877  | 0.125307 | 3644116  |
| DAM1        | 1.535533 | 0.256873 | 3634820  |
| NUP188      | 1.534444 | 0.06279  | 3634858  |
| C1_10190W_A | 1.53245  | 0.04141  | 3634785  |
| C2_08830W_A | 1.531953 | 0.069915 | 3643894  |
| PEX14       | 1.528442 | 0.064801 | 3648208  |
| C1_12640W_A | 1.527841 | 0.5562   | 3646837  |
| PR26        | 1.524727 | 0.034628 | 3642981  |
| CR_02390W_A | 1.524648 | 0.071649 | 3644930  |
| C1_04230W_A | 1.524557 | 0.094543 | 3644722  |
| VPS53       | 1.524346 | 0.068127 | 3639319  |
| MNN9        | 1.523712 | 0.157936 | 3641735  |
| RPS42       | 1.52131  | 0.039411 | 3640195  |
| GTR1        | 1.52055  | 0.333859 | 3643914  |
| MDG1        | 1.519808 | 0.04819  | 3643311  |
| C3_07850W_A | 1.51966  | 0.109342 | 3647466  |
| NIP100      | 1.518615 | 0.143515 | 3640970  |
| OFR1        | 1.516403 | 0.049511 | 3640710  |
| C2_03130W_A | 1.516107 | 0.215404 | 3642993  |
| C6_02810C_A | 1.513339 | 0.149156 | 3639248  |
| FEN12       | 1.512911 | 0.186828 | 3637404  |
| UGP1        | 1.511641 | 0.058367 | 3648144  |
| C2_03170W_A | 1.510263 | 0.595054 | 3642988  |
| C1_06970C_A | 1.509157 | 0.087071 | 3639567  |
| CR_08350W_A | 1.50799  | 0.04872  | 3642082  |
| C5_01880C_A | 1.506996 | 0.235334 | 3643751  |
| CR_01560W_A | 1.505233 | 0.426947 | 3640075  |
| C5_00550C_A | 1.502962 | 0.380667 | 3641535  |
| C3_03430C_A | 1.50248  | 0.346465 | 3638355  |
| C5_04360C_A | 1.502237 | 0.072155 | 3636483  |
| C2_08720W_A | 1.501939 | 0.201187 | 3643885  |

|             |          |          |          |
|-------------|----------|----------|----------|
| AGE2        | 1.501937 | 0.116986 | 3643810  |
| RPS10       | 1.501423 | 0.081977 | 30515149 |
| SYS3        | 1.500488 | 0.1194   | 3645119  |
| C3_01120W_A | 1.497543 | 0.275996 | 3639836  |
| BAT21       | 1.496622 | 0.128973 | 3637356  |
| PHO89       | 1.495978 | 0.203978 | 3635633  |
| EDC3        | 1.495171 | 0.235494 | 3646152  |
| C1_04790W_A | 1.494783 | 0.145034 | 3644772  |
| NIT2        | 1.490664 | 0.219363 | 3641874  |
| C6_00900C_A | 1.489759 | 0.347267 | 3644029  |
| PRE9        | 1.486859 | 0.117633 | 3638311  |
| C4_02450W_A | 1.486759 | 0.204581 | 3637845  |
| GPI19       | 1.486554 | 0.52808  | 3643471  |
| TUP1        | 1.48601  | 0.056279 | 3639369  |
| RTF1        | 1.48535  | 0.069205 | 3637964  |
| ENT3        | 1.481639 | 0.060354 | 3635813  |
| HSP60       | 1.481167 | 0.053724 | 3645275  |
| C1_03630W_A | 1.48029  | 0.196194 | 3636882  |
| C3_07760C_A | 1.480209 | 0.439753 | 3638450  |
| SRT1        | 1.478817 | 0.3084   | 3642020  |
| MCT1        | 1.478514 | 0.267219 | 3646683  |
| ECM29       | 1.478371 | 0.073997 | 3638433  |
| RPN5        | 1.475665 | 0.059618 | 3636405  |
| C2_03890W_A | 1.475578 | 0.50426  | 3637396  |
| C1_08180C_A | 1.475274 | 0.083551 | 3640743  |
| SGO1        | 1.473893 | 0.254291 | 3643464  |
| RIM13       | 1.473885 | 0.170576 | 3636487  |
| C1_08470W_A | 1.473258 | 0.26583  | 3646490  |
| C6_03260W_A | 1.473141 | 0.14863  | 3639183  |
| C4_05180C_A | 1.47303  | 0.103664 | 3647413  |
| C2_08660C_A | 1.471253 | 0.497115 | 3643907  |
| C1_09620C_A | 1.470957 | 0.308471 | 3634892  |
| CAF16       | 1.47086  | 0.068138 | 3646486  |
| C2_06320W_A | 1.46821  | 0.135433 | 3646927  |
| CR_10500C_A | 1.467895 | 0.242547 | 3638982  |
| CR_07340C_A | 1.467249 | 0.185206 | 3646056  |
| CDC13       | 1.466871 | 0.354304 | 3639293  |
| C1_13490C_A | 1.465581 | 0.386697 | 3636230  |
| IFF5        | 1.465066 | 0.153481 | 3642782  |
| C7_02850W_A | 1.464767 | 0.066218 | 3641399  |
| C1_11970C_A | 1.464217 | 0.280306 | 3642044  |
| IRS4        | 1.464126 | 0.155353 | 3645650  |
| APE2        | 1.462326 | 0.062117 | 3647990  |
| PHM5        | 1.461904 | 0.145902 | 3637951  |
| GYP2        | 1.461674 | 0.132464 | 3641780  |
| C5_03830C_A | 1.461438 | 0.185317 | 3647227  |
| C1_09910C_A | 1.460646 | 0.422027 | 3634798  |

|             |          |          |          |
|-------------|----------|----------|----------|
| C1_09110W_A | 1.460325 | 0.41891  | 3634940  |
| PTH2        | 1.460156 | 0.225383 | 3637709  |
| PRE8        | 1.460124 | 0.090788 | 3641906  |
| RPL82       | 1.456953 | 0.061607 | 3644419  |
| C1_01530C_A | 1.455503 | 0.064527 | 3640232  |
| ALG11       | 1.454967 | 0.460735 | 3645871  |
| GSG1        | 1.45449  | 0.350029 | 3647609  |
| RIB3        | 1.450225 | 0.069055 | 3642062  |
| EXO84       | 1.449806 | 0.15057  | 3644022  |
| CR_04450C_A | 1.446188 | 0.083322 | 3640987  |
| C3_03590W_A | 1.445874 | 0.100985 | 3638302  |
| C1_06590C_A | 1.445079 | 0.097064 | 3639514  |
| C7_02220C_A | 1.443797 | 0.098954 | 3636989  |
| C7_01350C_A | 1.440001 | 0.367515 | 3645899  |
| SPO75       | 1.439622 | 0.269083 | 3645364  |
| TRP2        | 1.436866 | 0.176914 | 3640079  |
| SNG4        | 1.435564 | 0.234663 | 3646714  |
| C3_03150W_A | 1.435375 | 0.172128 | 3638423  |
| C6_01960W_A | 1.434352 | 0.557507 | 3644559  |
| HGT19       | 1.434158 | 0.070252 | 3640558  |
| PHO85       | 1.433467 | 0.150299 | 3646148  |
| SRP101      | 1.431595 | 0.141781 | 3636513  |
| CR_04120C_A | 1.431028 | 0.298829 | 3640972  |
| C4_06730C_A | 1.430572 | 0.083169 | 3642924  |
| RAD14       | 1.429187 | 0.274313 | 3636953  |
| SEC14       | 1.427705 | 0.078475 | 3641542  |
| C4_05220C_A | 1.42759  | 0.413063 | 3646155  |
| C5_03480C_A | 1.427533 | 0.181403 | 3646965  |
| NTF2        | 1.426969 | 0.140837 | 30515039 |
| TIF35       | 1.426583 | 0.125871 | 3643308  |
| POM152      | 1.426038 | 0.104929 | 3638812  |
| TOM7        | 1.425878 | 0.395906 | 30515355 |
| C5_02390C_A | 1.425501 | 0.158523 | 3637795  |
| GDS1        | 1.425304 | 0.09099  | 3642626  |
| C2_01720C_A | 1.424257 | 0.3644   | 3635731  |
| GSH2        | 1.422991 | 0.104409 | 3642083  |
| CR_09490W_A | 1.422987 | 0.179989 | 3641896  |
| C2_10870W_A | 1.422835 | 0.223759 | 3641234  |
| CR_10620C_A | 1.422227 | 0.102365 | 3639006  |
| CRM1        | 1.421973 | 0.09471  | 3639721  |
| C2_00750W_A | 1.419394 | 0.540567 | 3638911  |
| CCT7        | 1.418936 | 0.115644 | 3643734  |
| SUA72       | 1.417693 | 0.400291 | 3648239  |
| MDL2        | 1.417623 | 0.189674 | 3639256  |
| C6_02640C_A | 1.416211 | 0.251179 | 3639222  |
| C1_05660C_A | 1.415936 | 0.07996  | 3639900  |
| C5_01090C_A | 1.415274 | 0.179454 | 3642625  |

|             |          |          |          |
|-------------|----------|----------|----------|
| REX2        | 1.413159 | 0.317888 | 3635783  |
| MRV2        | 1.412834 | 0.463909 | 3636545  |
| C7_03010W_A | 1.412192 | 0.102171 | 3641382  |
| C2_07910C_A | 1.410884 | 0.636129 | 30515146 |
| C6_03150C_A | 1.409961 | 0.222942 | 3639257  |
| C3_05760W_A | 1.409168 | 0.182354 | 3641720  |
| C1_08860C_A | 1.408515 | 0.226477 | 3634921  |
| VAC8        | 1.40739  | 0.11834  | 3647410  |
| CR_00470W_A | 1.407351 | 0.113442 | 3639725  |
| C7_00010C_A | 1.406524 | 0.183065 | 3638006  |
| PRE6        | 1.405865 | 0.141748 | 30515395 |
| C1_00760W_A | 1.405529 | 0.273444 | 3639351  |
| C1_11560C_A | 1.405484 | 0.374419 | 3645331  |
| CDC45       | 1.4054   | 0.372917 | 3648293  |
| NUP85       | 1.404606 | 0.107955 | 3635175  |
| C6_00800C_A | 1.402972 | 0.104914 | 3647069  |
| C1_08160W_A | 1.402574 | 0.185832 | 3640733  |
| C1_14470W_A | 1.402124 | 0.185257 | 3643327  |
| HHT1        | 1.397841 | 0.097584 | 3638444  |
| FET31       | 1.397652 | 0.179847 | 3647151  |
| DAP2        | 1.3974   | 0.216415 | 3637815  |
| C1_06640C_A | 1.396716 | 0.497271 | 30515010 |
| PRP13       | 1.396488 | 0.149716 | 3643194  |
| C2_04360W_A | 1.394971 | 0.269789 | 3645461  |
| C2_10060C_A | 1.39383  | 0.591342 | 3643948  |
| BZZ1        | 1.392953 | 0.132674 | 3636572  |
| RVS162      | 1.392917 | 0.288036 | 3646820  |
| CR_03690W_A | 1.391186 | 0.213633 | 3643222  |
| C1_10110W_A | 1.39089  | 0.460102 | 3634778  |
| C3_02970C_A | 1.390725 | 0.326241 | 3638385  |
| MED17       | 1.390271 | 0.250189 | 3636918  |
| C3_00170C_A | 1.387685 | 0.387164 | 3640589  |
| MIA40       | 1.38605  | 0.194132 | 3636866  |
| CR_02610C_A | 1.38555  | 0.110417 | 3642566  |
| C1_05010C_A | 1.385249 | 0.324202 | 3647532  |
| CEF3        | 1.384338 | 0.09197  | 3647040  |
| C5_03530C_A | 1.384267 | 0.573973 | 3646971  |
| RPC31       | 1.384236 | 0.362588 | 3642577  |
| TRP5        | 1.383363 | 0.129792 | 3648087  |
| C3_03680W_A | 1.382774 | 0.172498 | 3645648  |
| SMT3        | 1.382443 | 0.129491 | 3644550  |
| C4_01790W_A | 1.381347 | 0.247035 | 3635597  |
| CR_08640C_A | 1.381212 | 0.193474 | 3642112  |
| C1_08340C_A | 1.378246 | 0.366244 | 3640752  |
| C2_02180W_A | 1.37539  | 0.257762 | 3635752  |
| SDS22       | 1.374312 | 0.155715 | 3637362  |
| CCT3        | 1.37425  | 0.186131 | 3636458  |

|             |          |          |          |
|-------------|----------|----------|----------|
| C4_05820W_A | 1.371757 | 0.476268 | 30515277 |
| POS5        | 1.371356 | 0.242294 | 3638519  |
| C4_02860W_A | 1.370754 | 0.11867  | 3637909  |
| PEP8        | 1.369878 | 0.214668 | 3645624  |
| UAP1        | 1.368188 | 0.197662 | 3637769  |
| CR_09830W_A | 1.368132 | 0.564898 | 3638986  |
| MODF        | 1.367446 | 0.287311 | 3636182  |
| C5_01190W_A | 1.367067 | 0.283724 | 3642659  |
| C7_04240C_A | 1.366752 | 0.134935 | 3643165  |
| C1_12000C_A | 1.366193 | 0.754609 | 3642041  |
| C1_14560C_A | 1.363987 | 0.21226  | 3648376  |
| C4_02430W_A | 1.363086 | 0.25036  | 3637848  |
| ZCF16       | 1.362694 | 0.330815 | 3647395  |
| C2_02170W_A | 1.362103 | 0.336623 | 3635751  |
| C4_04130W_A | 1.361377 | 0.289624 | 3641221  |
| C1_12250C_A | 1.361024 | 0.145    | 3642022  |
| KRE9        | 1.360891 | 0.217268 | 3635183  |
| HSP90       | 1.360772 | 0.122683 | 3636951  |
| BAT22       | 1.359651 | 0.152379 | 3643663  |
| LAP4        | 1.359311 | 0.234955 | 3646979  |
| CR_08430W_A | 1.359133 | 0.153798 | 3642120  |
| RAD50       | 1.357908 | 0.228618 | 3636594  |
| C5_05270C_A | 1.357607 | 0.243005 | 3636496  |
| C1_06420C_A | 1.356527 | 0.352968 | 3639554  |
| MLT1        | 1.356134 | 0.131102 | 3640748  |
| BEM2        | 1.356104 | 0.181431 | 3637044  |
| YPT1        | 1.355115 | 0.141279 | 3636915  |
| ERF1        | 1.354671 | 0.206209 | 3643455  |
| VPS15       | 1.354329 | 0.244252 | 3644040  |
| SPT20       | 1.35383  | 0.280015 | 3642492  |
| SMD3        | 1.353454 | 0.516678 | 3647060  |
| C1_03660W_A | 1.353073 | 0.624416 | 30514982 |
| TIM8        | 1.352966 | 0.516049 | 3647469  |
| RVS167      | 1.352896 | 0.132845 | 3647831  |
| C2_08320C_A | 1.352807 | 0.677229 | 3648167  |
| FGR6-1      | 1.352697 | 0.677483 | 3647947  |
| PGA32       | 1.352476 | 0.681705 | 3638537  |
| C7_02010C_A | 1.352018 | 0.756035 | 3636954  |
| C2_07620W_A | 1.351989 | 0.754623 | 3645194  |
| SAP8        | 1.351989 | 0.754508 | 3638371  |
| C3_02160C_A | 1.351917 | 0.186097 | 3636654  |
| C4_04950W_A | 1.351908 | 0.755425 | 3641168  |
| C2_09630C_A | 1.351797 | 0.755208 | 3643796  |
| FAV2        | 1.351797 | 0.756548 | 3647236  |
| C5_03370C_A | 1.351767 | 0.758548 | 3646350  |
| C5_01260W_A | 1.351686 | 0.758191 | 3642615  |
| GUK1        | 1.351467 | 0.358257 | 3647231  |

|             |          |          |          |
|-------------|----------|----------|----------|
| C5_00150C_A | 1.34987  | 0.119244 | 3647872  |
| C3_00730W_A | 1.347703 | 0.266257 | 3640530  |
| GIS2        | 1.347117 | 0.139085 | 3643744  |
| C2_01800W_A | 1.346687 | 0.872605 | 30515092 |
| C2_02790C_A | 1.346687 | 0.872605 | 3643029  |
| CR_08260C_A | 1.346687 | 0.872605 | 3642100  |
| DAL52       | 1.346687 | 0.872605 | 3643736  |
| KRE62       | 1.346687 | 0.872605 | 3641543  |
| PGA19       | 1.346687 | 0.872605 | 3638894  |
| C1_06160W_A | 1.346576 | 0.87264  | 3639846  |
| C4_00250W_A | 1.346576 | 0.87264  | 3645035  |
| CR_03300C_A | 1.346576 | 0.87264  | 3645098  |
| PGA61       | 1.346576 | 0.87264  | 3640292  |
| C2_04500W_A | 1.345858 | 0.18414  | 3645462  |
| C5_00850C_A | 1.342472 | 0.768209 | 3642637  |
| C1_10240C_A | 1.342373 | 0.448854 | 3634881  |
| RPT5        | 1.341008 | 0.138106 | 3642911  |
| C1_12760W_A | 1.339507 | 0.411892 | 3646817  |
| PRR2        | 1.338723 | 0.568459 | 3646723  |
| CR_10290C_A | 1.33629  | 0.255404 | 3638935  |
| CR_06780W_A | 1.336132 | 0.266928 | 3647312  |
| MSH3        | 1.335628 | 0.383162 | 3643889  |
| GCR3        | 1.334604 | 0.180578 | 3646485  |
| CDC48       | 1.334372 | 0.170846 | 3644440  |
| C2_05900W_A | 1.334002 | 0.877484 | 3647475  |
| RPB8        | 1.330783 | 0.438741 | 3647301  |
| C1_05750C_A | 1.330598 | 0.218983 | 3639891  |
| ACH1        | 1.328141 | 0.214098 | 3643773  |
| C4_01430C_A | 1.327738 | 0.530246 | 3635625  |
| C3_07420W_A | 1.326988 | 0.165787 | 3638485  |
| PIN4        | 1.326965 | 0.188652 | 3640101  |
| C3_00640W_A | 1.326722 | 0.245155 | 3640574  |
| C1_09940W_A | 1.324017 | 0.597839 | 30515037 |
| C3_07110W_A | 1.323371 | 0.387897 | 3638442  |
| C3_07690C_A | 1.321719 | 0.273805 | 3638458  |
| YIM1        | 1.317784 | 0.288942 | 3637372  |
| ORC4        | 1.317285 | 0.293195 | 3637753  |
| CR_03430W_A | 1.315952 | 0.536583 | 3645114  |
| NOP1        | 1.315816 | 0.20584  | 3642947  |
| CR_01050C_A | 1.315166 | 0.391351 | 3640384  |
| PEP7        | 1.315085 | 0.40116  | 3645001  |
| RRD1        | 1.314514 | 0.473436 | 3638445  |
| RPN10       | 1.313804 | 0.190057 | 3644080  |
| AGP3        | 1.312736 | 0.385796 | 3641163  |
| DAD4        | 1.312477 | 0.65836  | 30515433 |
| C2_00390C_A | 1.312382 | 0.252952 | 3638822  |
| CR_10380C_A | 1.312184 | 0.656121 | 3638953  |



|             |          |          |          |
|-------------|----------|----------|----------|
| TIF11       | 1.311432 | 0.254615 | 3641208  |
| TIM54       | 1.310895 | 0.286021 | 3641349  |
| C3_02390W_A | 1.310706 | 0.573104 | 3636615  |
| C4_01300W_A | 1.310696 | 0.29871  | 3635605  |
| FGR22       | 1.309538 | 0.496574 | 3635862  |
| C6_01210W_A | 1.308219 | 0.300493 | 30515330 |
| TRR1        | 1.307443 | 0.198643 | 3637778  |
| C3_03380W_A | 1.30722  | 0.360952 | 3638367  |
| CUE5        | 1.305906 | 0.170745 | 3642467  |
| RPL40B      | 1.30509  | 0.180386 | 30515232 |
| PRE5        | 1.304929 | 0.225487 | 3643111  |
| CR_03240C_A | 1.304341 | 0.445495 | 3645126  |
| FAA4        | 1.303936 | 0.217786 | 3638973  |
| ATO1        | 1.302834 | 0.653175 | 3647761  |
| CFL5        | 1.301929 | 0.616353 | 3642612  |
| C2_02150C_A | 1.300777 | 0.302037 | 3635749  |
| PCL7        | 1.298526 | 0.210628 | 3639491  |
| C4_00860C_A | 1.297587 | 0.389209 | 3635717  |
| C5_00230C_A | 1.294523 | 0.724402 | 3641564  |
| C3_02580C_A | 1.294486 | 0.597744 | 3638376  |
| C6_04230W_A | 1.294234 | 0.724052 | 3646274  |
| FUN12       | 1.294122 | 0.204334 | 3640713  |
| CCT6        | 1.293413 | 0.211172 | 3642914  |
| C1_03620C_A | 1.29293  | 0.31173  | 30514981 |
| IFU5        | 1.291244 | 0.251493 | 3640116  |
| C7_04120W_A | 1.290467 | 0.643871 | 3643132  |
| C6_02540C_A | 1.290363 | 0.64451  | 3639176  |
| CDC15       | 1.289247 | 0.359721 | 3643459  |
| C2_08900W_A | 1.287423 | 0.454758 | 30515156 |
| C3_02870C_A | 1.287196 | 0.504427 | 3638334  |
| C3_06830C_A | 1.286484 | 0.290974 | 3638543  |
| C3_05990C_A | 1.286461 | 0.671724 | 3641732  |
| C6_04370W_A | 1.283641 | 0.467759 | 3646294  |
| CR_09040W_A | 1.283146 | 0.450714 | 3641894  |
| C4_01650C_A | 1.282906 | 0.434436 | 3635713  |
| LEA1        | 1.280023 | 0.619635 | 3641807  |
| C4_03960W_A | 1.279582 | 0.275369 | 30515264 |
| C7_01600W_A | 1.279031 | 0.385818 | 3637036  |
| CR_08300C_A | 1.278991 | 0.212388 | 3642076  |
| C4_00700C_A | 1.278888 | 0.463098 | 3645751  |
| C4_05610C_A | 1.278222 | 0.229385 | 3641782  |
| PRE3        | 1.272843 | 0.249748 | 3643660  |
| C3_06110C_A | 1.272027 | 0.357262 | 3641761  |
| RPS27A      | 1.271609 | 0.697049 | 30514993 |
| VPS36       | 1.269853 | 0.361028 | 3637354  |
| C1_09570W_A | 1.269711 | 0.447575 | 3634887  |
| ASR3        | 1.269338 | 0.224193 | 3637402  |

|             |          |          |          |
|-------------|----------|----------|----------|
| C2_06040C_A | 1.26752  | 0.623055 | 3644069  |
| CR_06520C_A | 1.267418 | 0.619096 | 3645263  |
| C4_04250W_A | 1.266665 | 0.551764 | 3646855  |
| CR_09240C_A | 1.266623 | 0.388944 | 3641919  |
| C5_00560W_A | 1.266274 | 0.336706 | 3648267  |
| C2_06430C_A | 1.266097 | 0.470173 | 3646558  |
| C7_01180W_A | 1.264048 | 0.428184 | 3645915  |
| MRS7        | 1.263151 | 0.239124 | 3640187  |
| IDI1        | 1.261054 | 0.374902 | 3637894  |
| C1_11790W_A | 1.260275 | 0.609912 | 3645326  |
| C4_00500W_A | 1.259637 | 0.351622 | 3648379  |
| C7_00060C_A | 1.259626 | 0.421192 | 3638013  |
| C1_11910W_A | 1.258871 | 0.678274 | 3642004  |
| C4_06880C_A | 1.25875  | 0.441941 | 30515287 |
| HIR1        | 1.258738 | 0.248535 | 3638796  |
| CR_03760W_A | 1.258446 | 0.432721 | 3643178  |
| ZCF6        | 1.257979 | 0.533109 | 3635837  |
| C7_03990C_A | 1.25604  | 0.473758 | 3643115  |
| TIM9        | 1.255607 | 0.581865 | 3646243  |
| C3_02850C_A | 1.253471 | 0.647213 | 3638332  |
| MEX67       | 1.25206  | 0.360181 | 3641020  |
| CDC23       | 1.252058 | 0.465819 | 3642111  |
| C7_04260W_A | 1.250247 | 0.322202 | 3643160  |
| DAL7        | 1.249487 | 0.820974 | 3636130  |
| C2_05390C_A | 1.249384 | 0.819711 | 3643434  |
| PGA26       | 1.249357 | 0.820013 | 3639890  |
| PGA42       | 1.249179 | 0.821069 | 3642801  |
| C2_04390W_A | 1.249077 | 0.824597 | 3645458  |
| C4_05040W_A | 1.249077 | 0.824384 | 30515275 |
| MVD         | 1.246553 | 0.2614   | 3639306  |
| C1_02510W_A | 1.245748 | 0.649727 | 3636796  |
| GSY1        | 1.243622 | 0.404    | 3640435  |
| MNN13       | 1.242754 | 0.629684 | 3637720  |
| C1_09220W_A | 1.242562 | 0.392274 | 3634898  |
| CR_10820W_A | 1.23833  | 0.544507 | 3638958  |
| CR_04300W_A | 1.237987 | 0.255127 | 3640995  |
| C4_05210W_A | 1.23767  | 0.59342  | 3646154  |
| SLP2        | 1.236418 | 0.519237 | 3644091  |
| C6_04190C_A | 1.235627 | 0.776625 | 3646282  |
| C4_03150W_A | 1.235375 | 0.403839 | 3637842  |
| SPS20       | 1.234527 | 0.466533 | 3645739  |
| C4_00420C_A | 1.234018 | 0.324687 | 3645021  |
| PGM2        | 1.233922 | 0.359975 | 3642562  |
| POX1        | 1.233182 | 0.34009  | 3640247  |
| C3_03260W_A | 1.232432 | 0.320614 | 3638320  |
| C3_01170W_A | 1.232399 | 0.42016  | 3647958  |
| C2_04780W_A | 1.232018 | 0.383243 | 3647781  |

|             |          |          |          |
|-------------|----------|----------|----------|
| ZCF22       | 1.232006 | 0.781055 | 3637727  |
| C1_03950C_A | 1.230999 | 0.738698 | 3646417  |
| BIO32       | 1.230798 | 0.735784 | 3643430  |
| MET8        | 1.230714 | 0.557089 | 3638533  |
| CR_08520C_A | 1.230398 | 0.738695 | 30515443 |
| C1_10920W_A | 1.230057 | 0.511408 | 3644433  |
| MRPL33      | 1.228955 | 0.618429 | 30515175 |
| C1_02200C_A | 1.228112 | 0.59511  | 3644593  |
| C1_00910W_A | 1.228032 | 0.715053 | 3639284  |
| GAP6        | 1.227086 | 0.297857 | 3646968  |
| CDS1        | 1.226408 | 0.324806 | 3647729  |
| C1_02030C_A | 1.224823 | 0.669233 | 3645415  |
| C1_07060C_A | 1.224701 | 0.674733 | 30515018 |
| C1_03920C_A | 1.224602 | 0.674686 | 3646413  |
| C1_09440W_A | 1.222639 | 0.488948 | 3634857  |
| TES15       | 1.220855 | 0.579804 | 3647478  |
| NTH1        | 1.220835 | 0.373358 | 3639665  |
| C6_01950C_A | 1.220482 | 0.496879 | 3644558  |
| SIT4        | 1.219757 | 0.393597 | 3647993  |
| C4_03560W_A | 1.219607 | 0.4527   | 3645373  |
| C1_02220C_A | 1.217373 | 0.514561 | 3644595  |
| C2_08630C_A | 1.216226 | 0.430601 | 3643910  |
| C7_04110W_A | 1.215143 | 0.526728 | 3643133  |
| RTT101      | 1.21289  | 0.50774  | 3639827  |
| IFD6        | 1.21232  | 0.731809 | 3644703  |
| TRA1        | 1.211864 | 0.387567 | 3641644  |
| ZCF25       | 1.210994 | 0.721127 | 3635694  |
| RPC11       | 1.209792 | 0.609304 | 3641239  |
| SFL2        | 1.209238 | 0.553132 | 3636434  |
| C1_04530C_A | 1.20831  | 0.515592 | 3646149  |
| C5_04980W_A | 1.208285 | 0.522623 | 3636536  |
| C4_01660W_A | 1.208141 | 0.377343 | 3635712  |
| C2_04960C_A | 1.207789 | 0.635472 | 3643442  |
| LYP1        | 1.207789 | 0.635839 | 6335417  |
| C4_02670W_A | 1.207613 | 0.573492 | 3637830  |
| AVT1        | 1.207255 | 0.538611 | 3646928  |
| C1_08540C_A | 1.206263 | 0.373635 | 3646497  |
| MIM1        | 1.206105 | 0.506081 | 30515394 |
| TIP120      | 1.205277 | 0.376732 | 3638494  |
| C1_02720W_A | 1.204829 | 0.545113 | 3636825  |
| C2_06300W_A | 1.20329  | 0.664786 | 3646924  |
| C7_01950W_A | 1.202025 | 0.649258 | 3636970  |
| LRG1        | 1.202015 | 0.450524 | 3639727  |
| FUR1        | 1.19906  | 0.502237 | 3646348  |
| C3_07770C_A | 1.198156 | 0.626458 | 3647457  |
| C1_11670W_A | 1.197682 | 0.41112  | 3645338  |
| STN1        | 1.19747  | 0.864336 | 3643901  |

|             |          |          |          |
|-------------|----------|----------|----------|
| C5_00380W_A | 1.195848 | 0.584527 | 3641553  |
| VAN1        | 1.195597 | 0.475668 | 3638527  |
| C1_05630C_A | 1.195301 | 0.383741 | 3639840  |
| ZCF11       | 1.194296 | 0.547729 | 3645109  |
| C5_02560C_A | 1.193802 | 0.452767 | 3637719  |
| C4_03130W_A | 1.192517 | 0.488818 | 3637921  |
| C1_12470W_A | 1.191226 | 0.818627 | 3648182  |
| C2_05520W_A | 1.190731 | 0.681657 | 3643421  |
| MED14       | 1.189243 | 0.495569 | 3637800  |
| UGA33       | 1.188436 | 0.557309 | 3641886  |
| C4_03040W_A | 1.187946 | 0.632997 | 30515253 |
| C4_06770W_A | 1.186676 | 0.557996 | 3642920  |
| C1_03960C_A | 1.185321 | 0.63437  | 3646418  |
| C5_00090C_A | 1.184409 | 0.496412 | 3647885  |
| SEN1        | 1.183992 | 0.496546 | 3635255  |
| MRR2        | 1.183765 | 0.492004 | 3647468  |
| EMP46       | 1.183418 | 0.508644 | 3645270  |
| VPS22       | 1.181571 | 0.732766 | 3647250  |
| COX15       | 1.181005 | 0.381912 | 3647071  |
| C1_11090C_A | 1.18046  | 0.543819 | 3644415  |
| DOS2        | 1.179473 | 0.460537 | 3636183  |
| C3_07630C_A | 1.179192 | 0.55754  | 3638491  |
| TAF4        | 1.178493 | 0.493472 | 3645198  |
| MAF1        | 1.178265 | 0.440799 | 3642332  |
| C1_04150C_A | 1.177956 | 0.827473 | 3644704  |
| MXR1        | 1.177841 | 0.553655 | 3638881  |
| SSN8        | 1.177773 | 0.649347 | 3641718  |
| BEM3        | 1.175718 | 0.528692 | 3637885  |
| C1_07100C_A | 1.175286 | 0.755219 | 3639487  |
| FLO9        | 1.174609 | 0.595255 | 3640581  |
| C4_03160C_A | 1.173432 | 0.747552 | 3637841  |
| C1_13750C_A | 1.172748 | 0.811327 | 3636137  |
| SET1        | 1.172689 | 0.505796 | 3639280  |
| C1_13950C_A | 1.172261 | 0.805689 | 3636186  |
| YKT6        | 1.171802 | 0.552768 | 3636863  |
| C6_03550C_A | 1.171362 | 0.729785 | 3640246  |
| C2_05530C_A | 1.171271 | 0.471577 | 3643422  |
| C7_00910C_A | 1.171017 | 0.579564 | 3637958  |
| PIN3        | 1.169686 | 0.434288 | 3635228  |
| YHM1        | 1.169395 | 0.686312 | 3644535  |
| AXL2        | 1.168959 | 0.642234 | 3641184  |
| C2_00060C_A | 1.168664 | 0.46617  | 3647914  |
| SPT3        | 1.1684   | 0.565385 | 3638977  |
| NPL6        | 1.167995 | 0.524746 | 3638883  |
| UCF1        | 1.166402 | 0.48529  | 3648170  |
| C2_02500W_A | 1.166265 | 0.53609  | 3635816  |
| HIS4        | 1.165571 | 0.418981 | 3645025  |

|             |          |          |          |
|-------------|----------|----------|----------|
| C7_03610C_A | 1.16513  | 0.548755 | 3646241  |
| RPT1        | 1.164398 | 0.421516 | 3642461  |
| SIM1        | 1.163952 | 0.452452 | 3636185  |
| C1_14310W_A | 1.163755 | 0.593006 | 3643315  |
| C1_11430W_A | 1.163489 | 0.741091 | 3644541  |
| LCB2        | 1.16272  | 0.595149 | 3636181  |
| POT1-2      | 1.16087  | 0.628384 | 3638908  |
| CR_07470W_A | 1.160738 | 0.760426 | 3646048  |
| C6_00260W_A | 1.159832 | 0.481424 | 3646065  |
| C1_04700C_A | 1.158367 | 0.51526  | 3644766  |
| PTC1        | 1.157332 | 0.552008 | 3634827  |
| C4_06440C_A | 1.156801 | 0.718989 | 3642793  |
| SKI2        | 1.15303  | 0.504984 | 3642143  |
| C1_02770W_A | 1.152395 | 0.775911 | 30514973 |
| FAD2        | 1.151055 | 0.478294 | 3644053  |
| C2_08240W_A | 1.150681 | 0.511213 | 3642344  |
| C1_11140W_A | 1.150421 | 0.645858 | 3644410  |
| C5_03670C_A | 1.150055 | 0.696508 | 3646987  |
| RIA1        | 1.149969 | 0.507912 | 3644478  |
| C7_02960C_A | 1.149709 | 0.675993 | 3641387  |
| C1_04620W_A | 1.148208 | 0.604755 | 3646135  |
| TSC2        | 1.147402 | 0.629686 | 3646953  |
| C3_02690C_A | 1.147236 | 0.61947  | 3638407  |
| PGA58       | 1.146853 | 0.889883 | 3637826  |
| IME2        | 1.146759 | 0.889701 | 3645099  |
| SLA2        | 1.146384 | 0.538031 | 3643149  |
| C3_02090C_A | 1.145517 | 0.666529 | 3636661  |
| C5_01870W_A | 1.145149 | 0.511238 | 3643752  |
| C2_03800C_A | 1.144724 | 0.518079 | 3637401  |
| CR_05700C_A | 1.144493 | 0.636585 | 3646701  |
| SMF12       | 1.144048 | 0.564791 | 3643509  |
| C2_09280C_A | 1.143601 | 0.650072 | 3644102  |
| GSL2        | 1.143424 | 0.598472 | 3640410  |
| C3_03820C_A | 1.141918 | 0.668027 | 3645631  |
| SYN8        | 1.141223 | 0.761425 | 3645120  |
| C1_06600W_A | 1.140855 | 0.485969 | 3639513  |
| ULP3        | 1.140781 | 0.645748 | 3640526  |
| C1_08760W_A | 1.139633 | 0.703053 | 3634787  |
| C2_03260W_A | 1.139208 | 0.574102 | 3637432  |
| C6_04080W_A | 1.138832 | 0.512022 | 3647837  |
| C2_04320W_A | 1.138811 | 0.720447 | 3648274  |
| C5_05090W_A | 1.137043 | 0.686144 | 3636493  |
| C5_02140C_A | 1.13699  | 0.588499 | 3637752  |
| AVT4        | 1.136316 | 0.649406 | 3645316  |
| C4_01120C_A | 1.135441 | 0.747042 | 3635683  |
| C1_12910W_A | 1.134454 | 0.885715 | 30515066 |
| C1_05610W_A | 1.134422 | 0.689508 | 3639843  |

|             |          |          |         |
|-------------|----------|----------|---------|
| C7_00490C_A | 1.134178 | 0.679983 | 3637986 |
| MED5        | 1.13407  | 0.668065 | 3648211 |
| FGR39       | 1.133993 | 0.821627 | 3644529 |
| MRS2        | 1.133737 | 0.761284 | 3640110 |
| C1_06340W_A | 1.133465 | 0.823197 | 3639499 |
| C5_04630W_A | 1.132997 | 0.732931 | 3636395 |
| MCU1        | 1.131291 | 0.757331 | 3636169 |
| ECM7        | 1.131234 | 0.648908 | 3645029 |
| C3_05420W_A | 1.130009 | 0.655766 | 3643666 |
| C2_00820W_A | 1.129401 | 0.675954 | 3638809 |
| GLK1        | 1.129205 | 0.570323 | 3648348 |
| C1_13720W_A | 1.129114 | 0.678548 | 3636134 |
| AKL1        | 1.128602 | 0.54284  | 3641237 |
| SKO1        | 1.127762 | 0.602793 | 3644688 |
| C6_04650W_A | 1.127281 | 0.551185 | 3645979 |
| MNR2        | 1.12681  | 0.597661 | 3645017 |
| PPZ1        | 1.126251 | 0.684643 | 3645265 |
| C1_14460W_A | 1.126034 | 0.552624 | 3643326 |
| C1_02160W_A | 1.125654 | 0.781582 | 3644584 |
| C3_02490C_A | 1.125596 | 0.595821 | 3638351 |
| CR_07870W_A | 1.125339 | 0.778585 | 3644146 |
| SEC65       | 1.123598 | 0.621157 | 3640123 |
| TIM50       | 1.123125 | 0.594743 | 3644530 |
| C2_06490W_A | 1.122602 | 0.645274 | 3646569 |
| C4_00050W_A | 1.121419 | 0.652693 | 3648060 |
| C2_01760C_A | 1.120273 | 0.796368 | 3635736 |
| CR_03700C_A | 1.119858 | 0.650771 | 3643223 |
| C4_01310W_A | 1.119443 | 0.879485 | 3635604 |
| PGA15       | 1.119351 | 0.878839 | 3642781 |
| SCS7        | 1.119244 | 0.632556 | 3641157 |
| TIM13       | 1.119101 | 0.87943  | 3637868 |
| ATO9        | 1.119034 | 0.880516 | 3640392 |
| C1_05480C_A | 1.119009 | 0.880427 | 3642486 |
| C5_00950C_A | 1.117849 | 0.638489 | 3642653 |
| MOB1        | 1.117705 | 0.701482 | 3639208 |
| BMT7        | 1.117455 | 0.822815 | 3638357 |
| C2_01340W_A | 1.117407 | 0.603987 | 3638844 |
| C4_01720C_A | 1.117266 | 0.580762 | 3635589 |
| CR_05560W_A | 1.117215 | 0.648027 | 3647592 |
| TFA1        | 1.116256 | 0.668949 | 3634850 |
| RAD2        | 1.115677 | 0.695609 | 3645374 |
| PRP3        | 1.115492 | 0.730683 | 3637406 |
| C1_12810W_A | 1.114438 | 0.768648 | 3646827 |
| FBP1        | 1.113742 | 0.600999 | 3647464 |
| C4_06800W_A | 1.112225 | 0.61281  | 3642917 |
| C7_00270W_A | 1.11173  | 0.667394 | 3637977 |
| C7_00070C_A | 1.111387 | 0.595343 | 3638011 |

|             |          |          |          |
|-------------|----------|----------|----------|
| HMT1        | 1.111263 | 0.633445 | 3640182  |
| CR_03540W_A | 1.111207 | 0.773465 | 3643215  |
| RPO21       | 1.108193 | 0.620187 | 3638991  |
| C2_04130W_A | 1.108177 | 0.671014 | 3637334  |
| C1_00970W_A | 1.10815  | 0.867134 | 30514958 |
| CR_05710C_A | 1.107998 | 0.829627 | 3646700  |
| LAB5        | 1.106908 | 0.639324 | 3637893  |
| C5_04620C_A | 1.106187 | 0.800192 | 3636394  |
| PFK2        | 1.106155 | 0.640592 | 3637056  |
| C4_03200C_A | 1.104886 | 0.68764  | 3637837  |
| MRPL10      | 1.102619 | 0.759637 | 3643446  |
| C5_02350C_A | 1.102446 | 0.859909 | 3637791  |
| CR_01020C_A | 1.10232  | 0.791844 | 3640420  |
| HOS1        | 1.100911 | 0.789101 | 3646518  |
| C6_01200W_A | 1.100464 | 0.903085 | 3644041  |
| C6_01220C_A | 1.099787 | 0.710205 | 3644042  |
| GLE2        | 1.098677 | 0.6919   | 3646293  |
| C2_07220W_A | 1.097171 | 0.694061 | 3643483  |
| EAF7        | 1.096109 | 0.697154 | 3640973  |
| CR_10830C_A | 1.093861 | 0.79147  | 3638960  |
| C4_04500C_A | 1.0932   | 0.754933 | 3641123  |
| C2_10300C_A | 1.091585 | 0.863177 | 3643955  |
| CDR3        | 1.091344 | 0.820117 | 3645365  |
| C1_13790C_A | 1.09115  | 0.819597 | 3636141  |
| C2_08420W_A | 1.090035 | 0.843561 | 3643897  |
| CR_06030C_A | 1.088744 | 0.766142 | 3644874  |
| C5_05130C_A | 1.088242 | 0.795295 | 3636459  |
| ECM14       | 1.087818 | 0.731862 | 3638392  |
| C6_01300W_A | 1.085843 | 0.836362 | 3644024  |
| PHO23       | 1.085463 | 0.742284 | 3643926  |
| C5_04340W_A | 1.08355  | 0.840061 | 3636481  |
| HXK1        | 1.081317 | 0.749486 | 3645964  |
| IRO1        | 1.081256 | 0.748055 | 3636648  |
| RPL38       | 1.079974 | 0.719626 | 30515082 |
| CR_02300C_A | 1.079934 | 0.759119 | 3644938  |
| MSS4        | 1.079752 | 0.693727 | 3647957  |
| C7_00850W_A | 1.078737 | 0.845234 | 3638056  |
| GPD2        | 1.078468 | 0.735565 | 3644563  |
| RAD23       | 1.077785 | 0.713449 | 3635834  |
| IMP1        | 1.077381 | 0.876855 | 3636881  |
| HPD1        | 1.074819 | 0.890304 | 3639239  |
| C2_05350C_A | 1.074574 | 0.884881 | 3643428  |
| C1_01860W_A | 1.074357 | 0.764379 | 3645430  |
| SIK1        | 1.074191 | 0.735364 | 3638925  |
| CGT1        | 1.074108 | 0.764716 | 3641808  |
| PDC12       | 1.073207 | 0.882282 | 3635591  |
| C6_03530C_A | 1.073147 | 0.893181 | 3640260  |

|             |          |          |         |
|-------------|----------|----------|---------|
| EHD3        | 1.073088 | 0.768454 | 3636858 |
| C5_01300C_A | 1.07306  | 0.893935 | 3642646 |
| CR_03400W_A | 1.071824 | 0.811014 | 3645137 |
| C1_00660C_A | 1.071493 | 0.774028 | 3639376 |
| C5_04720C_A | 1.071028 | 0.804662 | 3636518 |
| C1_03990W_A | 1.070519 | 0.836063 | 3646424 |
| DOA4        | 1.069796 | 0.754923 | 3643337 |
| C7_02530C_A | 1.068582 | 0.777934 | 3636940 |
| GAL10       | 1.068416 | 0.750833 | 3644583 |
| GCN2        | 1.068285 | 0.815773 | 3645897 |
| C7_04170W_A | 1.067745 | 0.916556 | 3643126 |
| ARV1        | 1.067722 | 0.916799 | 3635248 |
| DEM1        | 1.067683 | 0.852638 | 3643200 |
| C2_05960C_A | 1.067461 | 0.91771  | 3647479 |
| C1_11930W_A | 1.066285 | 0.741595 | 3642002 |
| GCD11       | 1.065386 | 0.769293 | 3637755 |
| ATF1        | 1.065115 | 0.837115 | 3635273 |
| PRN2        | 1.064596 | 0.840183 | 3639879 |
| SYS1        | 1.064546 | 0.871676 | 3643138 |
| KIC1        | 1.064305 | 0.753285 | 3647784 |
| C5_04640C_A | 1.064072 | 0.747681 | 3636397 |
| C5_01000C_A | 1.063865 | 0.819707 | 3642651 |
| C1_03280W_A | 1.06386  | 0.778178 | 3636901 |
| C6_00340C_A | 1.063626 | 0.8333   | 3646074 |
| C4_00580W_A | 1.063094 | 0.83972  | 3645773 |
| POL32       | 1.062779 | 0.839    | 3639881 |
| CR_08110W_A | 1.0627   | 0.883026 | 3642067 |
| C3_03100C_A | 1.060219 | 0.806137 | 3638399 |
| TAF19       | 1.060122 | 0.858679 | 3641396 |
| SAP98       | 1.058666 | 0.872036 | 3637435 |
| GCN20       | 1.058521 | 0.795736 | 3639314 |
| C1_03450C_A | 1.057467 | 0.808616 | 3636910 |
| PAN1        | 1.055818 | 0.784132 | 3637386 |
| PHO81       | 1.055165 | 0.860987 | 3639662 |
| LPG20       | 1.054856 | 0.84678  | 3644780 |
| MNN15       | 1.054786 | 0.886696 | 3644794 |
| C6_01850W_A | 1.054661 | 0.782569 | 3641629 |
| THI20       | 1.054198 | 0.867675 | 3637387 |
| C1_07090C_A | 1.054026 | 0.825998 | 3639488 |
| C5_00040C_A | 1.053795 | 0.803887 | 3647874 |
| C1_00470C_A | 1.053668 | 0.855489 | 3639315 |
| DRG1        | 1.053595 | 0.822031 | 3640714 |
| C7_00500W_A | 1.052365 | 0.934341 | 3637987 |
| C1_03100W_A | 1.052291 | 0.83333  | 3636925 |
| C4_05010W_A | 1.051299 | 0.826442 | 3641148 |
| C3_04120C_A | 1.051164 | 0.8821   | 3635282 |
| C6_00230W_A | 1.048425 | 0.907898 | 3646061 |



|             |          |          |          |
|-------------|----------|----------|----------|
| CR_01420W_A | 1.048236 | 0.847658 | 3640137  |
| PRK1        | 1.047324 | 0.819621 | 3640153  |
| SRD1        | 1.045748 | 0.908387 | 3635764  |
| ZCF13       | 1.045464 | 0.864801 | 3646354  |
| C3_04350C_A | 1.044292 | 0.965015 | 3635275  |
| UME6        | 1.044292 | 0.965009 | 3647522  |
| C5_00510W_A | 1.044229 | 0.965179 | 3641539  |
| THI4        | 1.044229 | 0.965169 | 3635160  |
| C2_10320C_A | 1.044143 | 0.965269 | 3643944  |
| CR_04390C_A | 1.043402 | 0.873942 | 3640980  |
| YPS7        | 1.042213 | 0.863654 | 3636937  |
| CR_09660W_A | 1.041911 | 0.918356 | 3647092  |
| ECM38       | 1.041377 | 0.920232 | 3645375  |
| C3_06280W_A | 1.040763 | 0.87274  | 3642238  |
| C1_11720W_A | 1.039912 | 0.944478 | 3645319  |
| CR_01950W_A | 1.039767 | 0.869857 | 3640107  |
| WSC4        | 1.039704 | 0.902959 | 3643282  |
| ERB1        | 1.038829 | 0.846419 | 3644702  |
| RAD59       | 1.038751 | 0.933245 | 3648281  |
| C5_02040W_A | 1.038638 | 0.880081 | 3643769  |
| C2_01530C_A | 1.037031 | 0.848098 | 3635803  |
| C1_11730W_A | 1.036768 | 0.869838 | 3645318  |
| C3_02080W_A | 1.036717 | 0.904938 | 3636575  |
| GDA1        | 1.035016 | 0.882734 | 3641762  |
| C2_10120W_A | 1.034864 | 0.925745 | 3643936  |
| SKI3        | 1.033659 | 0.866295 | 3634847  |
| C4_04550C_A | 1.033395 | 0.884134 | 3641106  |
| C3_04410C_A | 1.033054 | 0.867457 | 3635178  |
| C5_00330C_A | 1.031952 | 0.889092 | 3641556  |
| C7_03980W_A | 1.031492 | 0.917273 | 3643116  |
| GLG2        | 1.031201 | 0.919824 | 3642282  |
| ZCF17       | 1.029383 | 0.917649 | 3640205  |
| SNF1        | 1.028657 | 0.886856 | 3642643  |
| FGR28       | 1.028615 | 0.936883 | 3648315  |
| C4_06430C_A | 1.028049 | 0.937683 | 3642794  |
| CR_06790C_A | 1.028047 | 0.947674 | 3647311  |
| MED7        | 1.027821 | 0.948267 | 3638344  |
| FRP3        | 1.027673 | 0.896611 | 3648102  |
| CR_06850C_A | 1.025736 | 0.970593 | 30515424 |
| DCR1        | 1.025531 | 0.916015 | 3641164  |
| C1_06400C_A | 1.025178 | 0.921085 | 3639557  |
| DOT5        | 1.024556 | 0.920113 | 3640519  |
| C1_01930W_A | 1.02266  | 0.941662 | 30514966 |
| C1_05520W_A | 1.022547 | 0.965859 | 3642505  |
| C5_01220W_A | 1.0201   | 0.947487 | 3642620  |
| LYS143      | 1.020013 | 0.965736 | 3634894  |
| DBR1        | 1.017826 | 0.959612 | 3647560  |

|             |          |          |          |
|-------------|----------|----------|----------|
| GYP8        | 1.017187 | 0.950865 | 3637750  |
| C2_08910C_A | 1.017172 | 0.934053 | 3645798  |
| NOT4        | 1.016436 | 0.936262 | 3645115  |
| CR_02430C_A | 1.01471  | 0.947428 | 3644924  |
| CR_07310W_A | 1.013134 | 0.971759 | 3646058  |
| CR_06250W_A | 1.012684 | 0.973622 | 3644852  |
| CR_00570W_A | 1.012193 | 0.958264 | 3639664  |
| AVT7        | 1.012162 | 0.963721 | 3637433  |
| MRPL8       | 1.010631 | 0.970714 | 3646039  |
| C4_01290W_A | 1.01003  | 0.969144 | 3635699  |
| C1_07210C_A | 1.009597 | 0.968092 | 3644473  |
| C1_02740C_A | 1.008384 | 0.987989 | 3636827  |
| CR_00380W_A | 1.008138 | 0.988501 | 3639682  |
| C5_04320C_A | 1.00804  | 0.969906 | 3636480  |
| C1_09350W_A | 1.007646 | 0.978799 | 3634805  |
| NUP84       | 1.007583 | 0.974136 | 3645351  |
| UBA4        | 1.00729  | 0.976115 | 3644432  |
| SFC1        | 1.007042 | 0.985845 | 3636413  |
| C4_00850C_A | 1.006796 | 0.991771 | 3635718  |
| C6_04260C_A | 1.005992 | 0.989086 | 3646277  |
| C5_02820C_A | 1.00514  | 0.985251 | 3637808  |
| C2_04790C_A | 1.004753 | 0.988069 | 3647779  |
| C5_02480W_A | 1.004715 | 0.984438 | 3637762  |
| C1_08910C_A | 1.004539 | 0.991216 | 3634926  |
| SLF1        | 1.003854 | 0.991018 | 3638500  |
| C7_00300W_A | 1.002789 | 0.988733 | 3638046  |
| C7_00430W_A | 1.002663 | 0.990444 | 3637993  |
| C6_03240W_A | 1.002648 | 0.997195 | 3639181  |
| C2_03490C_A | 1.002478 | 0.993063 | 3637346  |
| ASG1        | 1.001586 | 0.994823 | 3647687  |
| C1_09430W_A | 1.000798 | 0.997463 | 3634855  |
| C2_03140C_A | 1.000473 | 0.998182 | 3642992  |
| C1_12670C_A | -1.00032 | 0.999345 | 3646834  |
| C5_00050W_A | -1.00052 | 0.99892  | 3647875  |
| C3_01690W_A | -1.00153 | 0.995478 | 3636604  |
| C1_02410C_A | -1.00179 | 0.995956 | 3636793  |
| C5_01140C_A | -1.0021  | 0.992956 | 3642663  |
| CR_09310W_A | -1.0024  | 0.992255 | 3641923  |
| YPT52       | -1.00268 | 0.991347 | 3643346  |
| GLC7        | -1.0027  | 0.989868 | 3647257  |
| TLO4        | -1.00316 | 0.995148 | 30515080 |
| FGR14       | -1.00344 | 0.987238 | 3648083  |
| CR_01170W_A | -1.00349 | 0.986432 | 3640429  |
| SEC7        | -1.00416 | 0.983566 | 3635220  |
| C4_02150C_A | -1.00435 | 0.992562 | 3635670  |
| GCN5        | -1.00447 | 0.985418 | 3646626  |
| CR_07160C_A | -1.00476 | 0.984488 | 3648347  |

|             |          |          |          |
|-------------|----------|----------|----------|
| C4_06280C_A | -1.00544 | 0.988422 | 3642802  |
| CR_03070W_A | -1.0059  | 0.977788 | 3645105  |
| C4_06660W_A | -1.00704 | 0.985107 | 3642809  |
| VID21       | -1.00816 | 0.969201 | 3642946  |
| UFE1        | -1.00833 | 0.967053 | 3643174  |
| C4_00560C_A | -1.00846 | 0.97536  | 3645744  |
| KRE30       | -1.00895 | 0.965657 | 3642311  |
| RSR1        | -1.00965 | 0.97298  | 3640145  |
| SSN3        | -1.01027 | 0.970947 | 3637353  |
| C6_03420W_A | -1.01087 | 0.982383 | 3639235  |
| FDH1        | -1.01199 | 0.973396 | 3646398  |
| YUH2        | -1.01212 | 0.949788 | 3636412  |
| CR_06960W_A | -1.0123  | 0.963083 | 3645737  |
| FMP27       | -1.01273 | 0.953629 | 3641645  |
| RPT2        | -1.01324 | 0.946043 | 3640525  |
| C2_00740C_A | -1.01398 | 0.944506 | 3638912  |
| KIS2        | -1.01438 | 0.956876 | 3636211  |
| SAC3        | -1.01606 | 0.948653 | 3635823  |
| C4_02880C_A | -1.01689 | 0.952292 | 3637907  |
| C1_07400C_A | -1.01852 | 0.951223 | 3644464  |
| C3_05680W_A | -1.01864 | 0.944972 | 3641724  |
| C2_01490C_A | -1.01896 | 0.94298  | 3635800  |
| SOD4        | -1.01897 | 0.97595  | 3638888  |
| GAL102      | -1.0193  | 0.935769 | 3644585  |
| CR_09340W_A | -1.01968 | 0.918808 | 3641900  |
| PUS4        | -1.0199  | 0.936082 | 3642661  |
| C6_02800W_A | -1.0211  | 0.945968 | 3639246  |
| C5_01920C_A | -1.02156 | 0.929966 | 3643742  |
| TEP1        | -1.02189 | 0.967576 | 3647653  |
| C3_02410C_A | -1.02243 | 0.922074 | 3638341  |
| C2_03530W_A | -1.0225  | 0.922035 | 3637341  |
| COX9        | -1.02291 | 0.930687 | 30515131 |
| SAP9        | -1.02307 | 0.908698 | 3645625  |
| LIG4        | -1.02548 | 0.888007 | 3642986  |
| ARO1        | -1.02573 | 0.898474 | 3635680  |
| C1_13840W_A | -1.02577 | 0.905064 | 3636129  |
| BCK1        | -1.02731 | 0.909161 | 3641384  |
| RPC40       | -1.02795 | 0.908852 | 3643427  |
| C1_02750C_A | -1.02907 | 0.89815  | 3636828  |
| CR_00340C_A | -1.02948 | 0.955112 | 30515365 |
| SEC9        | -1.03094 | 0.880292 | 3644052  |
| SSK2        | -1.03141 | 0.873975 | 3641144  |
| IFG3        | -1.03142 | 0.926122 | 3641545  |
| C2_05580W_A | -1.03183 | 0.902583 | 3645563  |
| C1_00380C_A | -1.0322  | 0.874431 | 3639292  |
| PSA2        | -1.03252 | 0.873241 | 3636159  |
| CDL1        | -1.03287 | 0.894817 | 3641132  |

|             |          |          |         |
|-------------|----------|----------|---------|
| PCD1        | -1.03453 | 0.887483 | 3647087 |
| C5_00100C_A | -1.03503 | 0.888352 | 3647883 |
| C1_04490W_A | -1.03521 | 0.856984 | 3646145 |
| C2_00420W_A | -1.03568 | 0.885591 | 3638819 |
| CTA3        | -1.03616 | 0.867398 | 3645333 |
| C1_13650C_A | -1.03712 | 0.892622 | 3636191 |
| C1_00030C_A | -1.0373  | 0.903496 | 3639373 |
| C5_02730C_A | -1.03881 | 0.873896 | 3637738 |
| C1_12900W_A | -1.03888 | 0.898472 | 3636154 |
| BMT6        | -1.0398  | 0.871408 | 3639258 |
| C2_10230W_A | -1.04004 | 0.925255 | 3643925 |
| MET28       | -1.04096 | 0.841279 | 3637962 |
| C2_02490C_A | -1.041   | 0.857831 | 3635815 |
| CR_06640C_A | -1.04101 | 0.899683 | 3646619 |
| C3_01260C_A | -1.04116 | 0.890153 | 3636625 |
| TEL1        | -1.04151 | 0.880637 | 3639263 |
| GDI1        | -1.04191 | 0.838885 | 3643298 |
| NRP1        | -1.04213 | 0.917598 | 3640698 |
| C2_08990C_A | -1.04399 | 0.883278 | 3645783 |
| C1_03330C_A | -1.04439 | 0.877418 | 3636859 |
| C2_04380C_A | -1.04568 | 0.868731 | 3645459 |
| FLC3        | -1.04603 | 0.861736 | 3642322 |
| C2_10160W_A | -1.04626 | 0.944881 | 3643932 |
| C1_03260W_A | -1.04654 | 0.893255 | 3636898 |
| C2_04870C_A | -1.04752 | 0.803484 | 3648111 |
| LEM3        | -1.04837 | 0.821833 | 3643456 |
| CR_07510W_A | -1.04944 | 0.903366 | 3647998 |
| C7_01510W_A | -1.04971 | 0.822813 | 3637049 |
| SEC15       | -1.0499  | 0.841272 | 3646845 |
| PIM1        | -1.04997 | 0.813758 | 3640999 |
| C3_05380W_A | -1.05093 | 0.87827  | 3643679 |
| C2_10760C_A | -1.05181 | 0.833223 | 3641238 |
| C3_00310C_A | -1.05379 | 0.89921  | 3640523 |
| HYR3        | -1.05419 | 0.789648 | 3644119 |
| C7_03860W_A | -1.05432 | 0.795833 | 3643144 |
| MNN12       | -1.05581 | 0.848675 | 3634904 |
| RPC19       | -1.05621 | 0.894658 | 3647693 |
| C1_04990C_A | -1.05635 | 0.854725 | 3647530 |
| GPM2        | -1.05639 | 0.813995 | 3644713 |
| HAL21       | -1.05645 | 0.817446 | 3644045 |
| C5_00250C_A | -1.05663 | 0.90059  | 3641562 |
| YMC2        | -1.05664 | 0.914501 | 3634786 |
| C4_06450W_A | -1.05689 | 0.906454 | 3642792 |
| C6_01520W_A | -1.05728 | 0.919927 | 3641617 |
| NOP5        | -1.0578  | 0.786559 | 3646084 |
| VPS17       | -1.05787 | 0.814009 | 3640218 |
| HAP3        | -1.0582  | 0.929328 | 3635629 |

|             |          |          |          |
|-------------|----------|----------|----------|
| DCK1        | -1.05827 | 0.791865 | 3637383  |
| C4_02660W_A | -1.05924 | 0.94097  | 3637831  |
| C4_06650W_A | -1.05938 | 0.782802 | 3642810  |
| C7_01960W_A | -1.06096 | 0.82252  | 3636969  |
| GLN1        | -1.06108 | 0.755433 | 3646386  |
| GAL7        | -1.06139 | 0.782009 | 3644591  |
| IFF4        | -1.06181 | 0.843847 | 3639694  |
| PGA11       | -1.06194 | 0.951925 | 3638939  |
| C4_06360C_A | -1.06212 | 0.953165 | 3642825  |
| PES1        | -1.0626  | 0.761837 | 3644105  |
| CR_08550W_A | -1.0636  | 0.756148 | 3642141  |
| ISA1        | -1.06365 | 0.758356 | 3639174  |
| CRH12       | -1.06429 | 0.774344 | 3636447  |
| C5_03690W_A | -1.06447 | 0.909197 | 3646989  |
| ZCF15       | -1.06454 | 0.791289 | 3637867  |
| C1_00890W_A | -1.06621 | 0.778136 | 3639354  |
| C3_06150W_A | -1.06706 | 0.787561 | 3641765  |
| RBR3        | -1.07012 | 0.772464 | 3646728  |
| C7_01270C_A | -1.07152 | 0.862386 | 3645908  |
| TRM9        | -1.07239 | 0.819296 | 3642074  |
| MED9        | -1.07261 | 0.812474 | 3643134  |
| MED4        | -1.07316 | 0.800429 | 3645209  |
| SUI2        | -1.07337 | 0.736445 | 3639569  |
| CCH1        | -1.07374 | 0.756765 | 3640175  |
| C1_05420W_A | -1.074   | 0.813609 | 3642493  |
| ROD1        | -1.07447 | 0.724468 | 3635763  |
| C2_02040W_A | -1.07465 | 0.747209 | 3635848  |
| FGR43       | -1.07468 | 0.87027  | 3634828  |
| ARG83       | -1.07494 | 0.822147 | 3637862  |
| C1_10340W_A | -1.07508 | 0.818932 | 3634909  |
| CBF1        | -1.0757  | 0.751384 | 3642779  |
| CR_05100W_A | -1.07631 | 0.816518 | 3646403  |
| VPS34       | -1.07655 | 0.782164 | 3639540  |
| SIT1        | -1.07658 | 0.728467 | 3642307  |
| C3_07350W_A | -1.07743 | 0.74352  | 3638476  |
| PGA27       | -1.07752 | 0.874879 | 3638811  |
| CTA26       | -1.08008 | 0.775671 | 3638965  |
| CR_05140W_A | -1.08112 | 0.874298 | 3646400  |
| C2_07870C_A | -1.0831  | 0.966412 | 3642319  |
| C5_03770C_A | -1.0831  | 0.966393 | 3647233  |
| C6_02550W_A | -1.0831  | 0.966393 | 3639204  |
| C6_04070C_A | -1.0831  | 0.966393 | 3647826  |
| C7_02360W_A | -1.0831  | 0.966535 | 3636931  |
| CR_09350C_A | -1.0831  | 0.966606 | 3641901  |
| C1_13180W_A | -1.08319 | 0.966359 | 3636162  |
| C3_01970C_A | -1.08319 | 0.966359 | 3636597  |
| C3_02200W_A | -1.08319 | 0.966359 | 30515185 |

|             |          |          |          |
|-------------|----------|----------|----------|
| C5_03730W_A | -1.08319 | 0.966359 | 3647238  |
| C6_02760W_A | -1.08319 | 0.966359 | 3639218  |
| RBR1        | -1.08319 | 0.966359 | 3640986  |
| SCW4        | -1.08319 | 0.966359 | 3636797  |
| C1_06220C_A | -1.08328 | 0.966324 | 3647518  |
| CR_07300W_A | -1.08328 | 0.966324 | 3646059  |
| CR_07740W_A | -1.08328 | 0.966324 | 30515430 |
| CR_08740W_A | -1.08328 | 0.966324 | 3642123  |
| GIT4        | -1.08328 | 0.966324 | 3642635  |
| PGA28       | -1.08328 | 0.966324 | 3641350  |
| PTR2        | -1.08328 | 0.966324 | 3640089  |
| CR_01550C_A | -1.08404 | 0.82956  | 3640074  |
| C1_02390W_A | -1.08407 | 0.784857 | 3636791  |
| CR_00010C_A | -1.0842  | 0.735292 | 3639712  |
| C2_09480W_A | -1.08443 | 0.920086 | 3643819  |
| GCD1        | -1.08471 | 0.694635 | 3640965  |
| SNM1        | -1.08662 | 0.822022 | 3642609  |
| PPS1        | -1.08799 | 0.827235 | 3646526  |
| C2_04620W_A | -1.08801 | 0.707365 | 3645438  |
| C1_07360W_A | -1.08885 | 0.730103 | 3644470  |
| C2_08770C_A | -1.09019 | 0.836975 | 3643878  |
| C1_06650W_A | -1.09087 | 0.713532 | 3639543  |
| C3_00400C_A | -1.09266 | 0.747597 | 3640554  |
| C1_00530C_A | -1.09269 | 0.707527 | 3639368  |
| MEA1        | -1.09336 | 0.873806 | 3635154  |
| C4_06670W_A | -1.09368 | 0.875535 | 3642951  |
| C3_04380C_A | -1.09393 | 0.700765 | 3635173  |
| CR_01570W_A | -1.09538 | 0.839446 | 3640077  |
| KAP120      | -1.09572 | 0.621244 | 3643110  |
| CR_08590W_A | -1.09705 | 0.689641 | 3642106  |
| RPO26       | -1.09825 | 0.707748 | 3646351  |
| PDC2        | -1.09883 | 0.754767 | 3634862  |
| FGR32       | -1.09915 | 0.619195 | 3644136  |
| C6_03540W_A | -1.09924 | 0.717726 | 3640244  |
| C1_00160C_A | -1.10142 | 0.650301 | 3639341  |
| C5_00400C_A | -1.10144 | 0.687263 | 3641550  |
| NOT3        | -1.10201 | 0.625337 | 3638829  |
| MET18       | -1.10231 | 0.804045 | 3636631  |
| CR_09700W_A | -1.10251 | 0.784661 | 3647088  |
| HOS2        | -1.10353 | 0.763226 | 3640509  |
| C2_06230W_A | -1.10357 | 0.608681 | 3646911  |
| SMI1        | -1.1062  | 0.649255 | 3640741  |
| C7_00130W_A | -1.10625 | 0.70431  | 3637975  |
| RAD9        | -1.10694 | 0.736335 | 3637780  |
| HAP31       | -1.10762 | 0.810271 | 3640994  |
| C2_07520C_A | -1.10778 | 0.703212 | 3645207  |
| C1_12350W_A | -1.1078  | 0.656437 | 3642063  |

|             |          |          |          |
|-------------|----------|----------|----------|
| CR_04280C_A | -1.108   | 0.698027 | 3640993  |
| C1_07280C_A | -1.11078 | 0.858486 | 30515021 |
| C3_00950C_A | -1.11114 | 0.724581 | 3639852  |
| NPR1        | -1.11176 | 0.601735 | 3639498  |
| PGA1        | -1.11282 | 0.778435 | 3638980  |
| ABZ1        | -1.11457 | 0.592794 | 3648307  |
| STR2        | -1.11547 | 0.57788  | 3644689  |
| C1_14430C_A | -1.11547 | 0.689209 | 3643297  |
| C4_03700W_A | -1.11558 | 0.706545 | 3645361  |
| C1_09310C_A | -1.11635 | 0.72977  | 3634833  |
| TGL99       | -1.11728 | 0.68293  | 3636168  |
| MNN22       | -1.11769 | 0.737497 | 3641117  |
| C1_10350C_A | -1.11809 | 0.632523 | 3634835  |
| ERG3        | -1.11926 | 0.665164 | 3644776  |
| MDS3        | -1.1199  | 0.575718 | 3638464  |
| BUL1        | -1.12083 | 0.787971 | 3640734  |
| CR_09110C_A | -1.12084 | 0.711491 | 3641929  |
| C1_11370C_A | -1.12163 | 0.704508 | 3644547  |
| CR_07140C_A | -1.12212 | 0.63974  | 3648227  |
| C3_00270C_A | -1.12218 | 0.617523 | 3640527  |
| MED21       | -1.12264 | 0.8021   | 3639010  |
| FCY23       | -1.12354 | 0.648924 | 3647681  |
| CR_03960C_A | -1.1236  | 0.72602  | 3640963  |
| ALK2        | -1.12364 | 0.728217 | 3639700  |
| ORC1        | -1.12664 | 0.57433  | 3636922  |
| C1_03360W_A | -1.12696 | 0.546964 | 3636889  |
| C5_01490C_A | -1.12707 | 0.538826 | 3647058  |
| CR_06530W_A | -1.12714 | 0.683321 | 3645262  |
| C2_05540C_A | -1.12738 | 0.684455 | 3645559  |
| CGR1        | -1.12822 | 0.642371 | 3637853  |
| PFK1        | -1.12848 | 0.569123 | 3636448  |
| C5_02830W_A | -1.12858 | 0.588383 | 3637809  |
| C2_03830W_A | -1.12862 | 0.612159 | 3637399  |
| C2_01630W_A | -1.12884 | 0.875662 | 3635738  |
| CR_08280W_A | -1.12906 | 0.721726 | 3642102  |
| C3_04690C_A | -1.12915 | 0.73313  | 3635196  |
| C3_03070W_A | -1.12938 | 0.659567 | 3638396  |
| SEC6        | -1.1296  | 0.531443 | 3640565  |
| RFX2        | -1.13274 | 0.827692 | 3635658  |
| C2_09690C_A | -1.13279 | 0.63936  | 3643789  |
| C6_02430W_A | -1.13284 | 0.597111 | 3639163  |
| CR_10610C_A | -1.13402 | 0.804954 | 3639005  |
| CR_06470W_A | -1.13428 | 0.575394 | 3645277  |
| CR_00110W_A | -1.1348  | 0.517763 | 3639731  |
| PEX13       | -1.13485 | 0.546807 | 3641877  |
| C6_03380W_A | -1.13666 | 0.529296 | 3639231  |
| ENA2        | -1.13668 | 0.502387 | 3639291  |

|             |          |          |          |
|-------------|----------|----------|----------|
| GPR1        | -1.13721 | 0.618511 | 3642616  |
| C5_03850W_A | -1.13736 | 0.639501 | 3647225  |
| TPS1        | -1.13857 | 0.580787 | 3646699  |
| SCT1        | -1.13944 | 0.530982 | 3648346  |
| BUR2        | -1.14016 | 0.668249 | 3637772  |
| C2_03930C_A | -1.14084 | 0.600314 | 3637423  |
| ZCF31       | -1.14156 | 0.572459 | 3635191  |
| C2_03780C_A | -1.14227 | 0.577072 | 3637368  |
| PLB2        | -1.1423  | 0.807756 | 3644562  |
| C5_04610W_A | -1.14312 | 0.56883  | 3636393  |
| CR_10630W_A | -1.14458 | 0.748204 | 3639007  |
| CR_03410W_A | -1.14557 | 0.594869 | 3645136  |
| C5_05000C_A | -1.14886 | 0.530329 | 3636539  |
| PIR1        | -1.1492  | 0.545645 | 3645801  |
| FLC1        | -1.1494  | 0.517167 | 3639854  |
| TTR1        | -1.14957 | 0.50731  | 3639313  |
| C2_08060W_A | -1.14969 | 0.784134 | 30515151 |
| MKC1        | -1.14999 | 0.496424 | 3639710  |
| CR_06010W_A | -1.15002 | 0.65198  | 3644870  |
| SKN7        | -1.15197 | 0.587037 | 3641563  |
| BNI1        | -1.15206 | 0.467326 | 3636118  |
| ZDS1        | -1.15215 | 0.491595 | 3641103  |
| C1_14080W_A | -1.15262 | 0.424923 | 3643345  |
| C3_07380W_A | -1.15449 | 0.541362 | 3638473  |
| C1_12530C_A | -1.15508 | 0.683394 | 3647608  |
| C2_01230W_A | -1.15546 | 0.744004 | 3638795  |
| DAD2        | -1.15592 | 0.806408 | 3643465  |
| C4_03680C_A | -1.15827 | 0.710443 | 3645363  |
| DFG5        | -1.16026 | 0.448112 | 3638867  |
| C1_04930C_A | -1.16056 | 0.787081 | 3644792  |
| C3_02760C_A | -1.1606  | 0.534681 | 3638413  |
| STE50       | -1.16106 | 0.582884 | 3636660  |
| C1_10470W_A | -1.16135 | 0.5122   | 3647184  |
| CR_06090W_A | -1.16184 | 0.515499 | 6335359  |
| C6_03300C_A | -1.16249 | 0.518673 | 3639196  |
| C4_01820C_A | -1.16269 | 0.516193 | 3635594  |
| C5_02330W_A | -1.1631  | 0.71775  | 3637789  |
| C3_03540W_A | -1.16327 | 0.516196 | 3638313  |
| C1_07570C_A | -1.16343 | 0.715484 | 3646675  |
| C7_01230C_A | -1.16352 | 0.513654 | 3645906  |
| C5_00140C_A | -1.16443 | 0.603221 | 3647873  |
| GSL1        | -1.16466 | 0.600341 | 3639844  |
| CAS5        | -1.16473 | 0.50178  | 3635652  |
| NAP1        | -1.16485 | 0.444683 | 3639714  |
| C7_00810W_A | -1.16525 | 0.492684 | 3637940  |
| ESS1        | -1.16553 | 0.512524 | 3647989  |
| FCR3        | -1.16576 | 0.534676 | 3643760  |



|             |          |          |          |
|-------------|----------|----------|----------|
| CR_08710W_A | -1.16752 | 0.443212 | 3642131  |
| HGH1        | -1.16758 | 0.529183 | 3635647  |
| HOL1        | -1.16821 | 0.735246 | 3636838  |
| INO2        | -1.16941 | 0.696599 | 3639674  |
| RPL7        | -1.16947 | 0.523969 | 6335362  |
| SPT23       | -1.16957 | 0.484188 | 3643958  |
| ULP2        | -1.17002 | 0.549262 | 3643196  |
| CR_03730C_A | -1.17054 | 0.533513 | 3643226  |
| LTE1        | -1.17069 | 0.585086 | 3643495  |
| C1_14450C_A | -1.17086 | 0.411734 | 3643299  |
| FGR10       | -1.17115 | 0.736265 | 3641159  |
| ZCF8        | -1.17121 | 0.562178 | 3636651  |
| C2_01750C_A | -1.1717  | 0.586825 | 3635734  |
| YOR1        | -1.17208 | 0.483624 | 3643964  |
| HAL22       | -1.17244 | 0.615915 | 3644051  |
| C5_02370C_A | -1.17273 | 0.543041 | 3637793  |
| C3_05020W_A | -1.17297 | 0.64615  | 3635170  |
| C1_03460C_A | -1.1731  | 0.717721 | 3636911  |
| C4_06130W_A | -1.17429 | 0.374956 | 3648085  |
| CR_00220W_A | -1.17511 | 0.581366 | 3639699  |
| EAP1        | -1.17555 | 0.493057 | 3643814  |
| C3_06040W_A | -1.17657 | 0.740931 | 3641745  |
| BPH1        | -1.17714 | 0.444418 | 3639547  |
| C4_06090C_A | -1.17791 | 0.55117  | 3646532  |
| MLS1        | -1.17792 | 0.400479 | 3634875  |
| C4_02340W_A | -1.17794 | 0.515718 | 3637883  |
| C1_04630C_A | -1.17894 | 0.478507 | 3644762  |
| C5_00320W_A | -1.17917 | 0.63074  | 30515291 |
| C3_05430W_A | -1.17948 | 0.581583 | 3643667  |
| C1_05280W_A | -1.18001 | 0.559912 | 3642475  |
| C2_00270C_A | -1.18012 | 0.543747 | 3638803  |
| HST1        | -1.18029 | 0.54948  | 3634770  |
| C1_03910C_A | -1.18124 | 0.688099 | 3646412  |
| C1_01840C_A | -1.18143 | 0.437501 | 3645432  |
| C6_01450C_A | -1.18177 | 0.501088 | 3641624  |
| C5_03170C_A | -1.1828  | 0.547381 | 3637801  |
| RPT6        | -1.18438 | 0.35078  | 3643877  |
| GPI2        | -1.18466 | 0.743927 | 3641011  |
| C4_00840W_A | -1.18482 | 0.475204 | 3635722  |
| CRZ1        | -1.18509 | 0.471219 | 3641722  |
| C2_10820C_A | -1.18589 | 0.458356 | 3641230  |
| C6_00390W_A | -1.19047 | 0.458431 | 3646086  |
| IPK2        | -1.19078 | 0.489636 | 3643784  |
| TOM1        | -1.19096 | 0.397396 | 3642987  |
| CDG1        | -1.19152 | 0.383665 | 3641883  |
| C3_04190W_A | -1.19169 | 0.861488 | 30515203 |
| C5_00600C_A | -1.19171 | 0.859654 | 3641586  |

|             |          |          |          |
|-------------|----------|----------|----------|
| ALK8        | -1.19181 | 0.859669 | 3648226  |
| C6_01000C_A | -1.19266 | 0.578029 | 3644048  |
| ALG1        | -1.19305 | 0.588216 | 3646517  |
| C1_00430W_A | -1.19331 | 0.472704 | 3639285  |
| C7_03620C_A | -1.19456 | 0.419195 | 3646242  |
| CR_06510W_A | -1.19557 | 0.792252 | 3645264  |
| C3_06290W_A | -1.19581 | 0.394071 | 3642237  |
| JAB1        | -1.196   | 0.46537  | 3646811  |
| CR_07200W_A | -1.19629 | 0.594599 | 3646044  |
| C7_01590C_A | -1.19642 | 0.624356 | 3637037  |
| C6_04440C_A | -1.19713 | 0.507868 | 3645983  |
| C7_04150W_A | -1.19849 | 0.415334 | 3643128  |
| CR_03180W_A | -1.19888 | 0.39456  | 3645133  |
| C3_04370C_A | -1.19923 | 0.434003 | 3635172  |
| CCR4        | -1.19964 | 0.394446 | 3640749  |
| NGS1        | -1.19968 | 0.43198  | 3639703  |
| RAT1        | -1.19972 | 0.363104 | 3635686  |
| C6_00490W_A | -1.19991 | 0.597917 | 3647150  |
| CR_03220C_A | -1.20059 | 0.682194 | 3645128  |
| CR_01130W_A | -1.20165 | 0.452218 | 3640433  |
| C2_06030W_A | -1.20177 | 0.411593 | 3644070  |
| C1_11150W_A | -1.20221 | 0.48995  | 3648356  |
| C2_07030C_A | -1.20389 | 0.547428 | 3643498  |
| C4_04930C_A | -1.20423 | 0.662106 | 3641170  |
| C5_02660C_A | -1.20474 | 0.50168  | 3637771  |
| SPT10       | -1.20511 | 0.486288 | 3645729  |
| RPB4        | -1.20512 | 0.506519 | 3647800  |
| C2_02910W_A | -1.20832 | 0.806783 | 30515097 |
| BRO1        | -1.20855 | 0.357482 | 3636590  |
| HCM1        | -1.20872 | 0.809678 | 3634794  |
| SNU114      | -1.20889 | 0.440786 | 3647798  |
| C2_07360W_A | -1.20947 | 0.603291 | 3645236  |
| CR_02210W_A | -1.21113 | 0.461582 | 3644943  |
| CR_07020W_A | -1.21158 | 0.405489 | 3645731  |
| OFD1        | -1.21239 | 0.369979 | 3646962  |
| NHP2        | -1.2146  | 0.336044 | 3641003  |
| CR_10740W_A | -1.2146  | 0.452654 | 3638941  |
| RTA3        | -1.21486 | 0.439753 | 3646566  |
| C3_05320W_A | -1.21549 | 0.397723 | 3643648  |
| GCN3        | -1.21639 | 0.385228 | 3645905  |
| C3_01670W_A | -1.21691 | 0.386429 | 3636606  |
| SNP3        | -1.21723 | 0.656006 | 3640991  |
| GLN4        | -1.21731 | 0.379026 | 3637998  |
| RHD3        | -1.21762 | 0.335494 | 3641212  |
| C5_00390C_A | -1.21792 | 0.331903 | 3641552  |
| PEX12       | -1.21879 | 0.383669 | 3638862  |
| C3_02360C_A | -1.21914 | 0.726481 | 3636617  |

|             |          |          |          |
|-------------|----------|----------|----------|
| CR_09140C_A | -1.21915 | 0.46331  | 3641879  |
| HRK1        | -1.2196  | 0.282178 | 3640586  |
| C1_11300C_A | -1.22018 | 0.410542 | 3644552  |
| C2_05490W_A | -1.22145 | 0.702457 | 3643417  |
| C1_07160C_A | -1.223   | 0.28055  | 30515020 |
| C4_03090W_A | -1.22313 | 0.374543 | 3637926  |
| HSM3        | -1.2233  | 0.359064 | 3646713  |
| CR_01360W_A | -1.22368 | 0.670889 | 3640167  |
| MSF1        | -1.22552 | 0.411215 | 3638806  |
| C2_07510W_A | -1.2272  | 0.57306  | 3645208  |
| C7_02090C_A | -1.2272  | 0.574257 | 3637024  |
| C3_02720W_A | -1.22735 | 0.536568 | 3638410  |
| TRS33       | -1.22744 | 0.564096 | 3636992  |
| KIP4        | -1.2275  | 0.537314 | 3642032  |
| CR_04180C_A | -1.22807 | 0.300751 | 3640937  |
| HST3        | -1.22897 | 0.446086 | 3642641  |
| IRA2        | -1.23509 | 0.292197 | 3642011  |
| MRP7        | -1.23562 | 0.412482 | 3643118  |
| GPX2        | -1.23577 | 0.409646 | 3644009  |
| C1_06530C_A | -1.23618 | 0.289639 | 3639521  |
| PRO1        | -1.23643 | 0.25063  | 3639000  |
| ALO1        | -1.23653 | 0.279358 | 3638983  |
| GCN1        | -1.2366  | 0.29379  | 3641256  |
| MNT2        | -1.23789 | 0.453151 | 3636583  |
| CLA4        | -1.2385  | 0.461546 | 3634878  |
| C4_04760C_A | -1.23857 | 0.458448 | 3641118  |
| XUT1        | -1.23881 | 0.560815 | 3642785  |
| YML6        | -1.2398  | 0.417526 | 3637954  |
| OLE1        | -1.24004 | 0.316419 | 3640755  |
| SIS1        | -1.24016 | 0.298745 | 3644841  |
| C1_01470W_A | -1.24018 | 0.272403 | 3640241  |
| POL5        | -1.2407  | 0.388828 | 3639254  |
| SOL1        | -1.24102 | 0.459853 | 3645627  |
| C7_00450C_A | -1.24164 | 0.5109   | 3637991  |
| EHT1        | -1.24495 | 0.342905 | 3636894  |
| CR_06270W_A | -1.24682 | 0.797092 | 3644854  |
| C1_01460W_A | -1.24686 | 0.315402 | 3640240  |
| ADH5        | -1.24734 | 0.310485 | 3640156  |
| C1_01820C_A | -1.2479  | 0.391189 | 3645435  |
| C4_04120C_A | -1.24796 | 0.389249 | 3641222  |
| IPK1        | -1.24821 | 0.525276 | 3648091  |
| ATO2        | -1.24941 | 0.325908 | 3639845  |
| SRB8        | -1.25197 | 0.34138  | 3641128  |
| CR_10390W_A | -1.252   | 0.637267 | 3638954  |
| RAC1        | -1.25237 | 0.378588 | 3639508  |
| C1_03400W_A | -1.25487 | 0.261803 | 3636904  |
| C1_00880W_A | -1.25511 | 0.494549 | 3639355  |

|             |          |          |          |
|-------------|----------|----------|----------|
| C6_02650C_A | -1.25551 | 0.357998 | 3639223  |
| RPR2        | -1.25609 | 0.645964 | 3641017  |
| C4_06410W_A | -1.25661 | 0.49382  | 3642796  |
| C5_05210W_A | -1.25794 | 0.319909 | 3636468  |
| TRM2        | -1.25801 | 0.419074 | 3640235  |
| TIF3        | -1.25802 | 0.257146 | 3641646  |
| KIS1        | -1.25942 | 0.216841 | 3644063  |
| C6_02310W_A | -1.25955 | 0.411629 | 3645875  |
| CR_07660C_A | -1.25997 | 0.284789 | 3647256  |
| C2_02440W_A | -1.26003 | 0.333175 | 3635758  |
| ARG3        | -1.26075 | 0.65797  | 3639180  |
| CR_07480W_A | -1.26233 | 0.262358 | 3646047  |
| C6_03590C_A | -1.26266 | 0.455899 | 3640251  |
| C7_02860C_A | -1.26275 | 0.254633 | 3641397  |
| C7_00840C_A | -1.26276 | 0.522432 | 3638057  |
| C4_00470C_A | -1.26283 | 0.348822 | 3645011  |
| C5_04870W_A | -1.2636  | 0.434915 | 3636438  |
| C3_07600W_A | -1.26361 | 0.433142 | 3638495  |
| MEC3        | -1.26376 | 0.541786 | 3646910  |
| CR_10170C_A | -1.26478 | 0.376138 | 3638916  |
| TSM1        | -1.26577 | 0.219851 | 3645953  |
| C5_03810C_A | -1.2674  | 0.677131 | 3647229  |
| HGT16       | -1.2675  | 0.679769 | 3646026  |
| MED19       | -1.26869 | 0.3992   | 30515334 |
| C1_01090C_A | -1.26981 | 0.42688  | 3640174  |
| C5_04890C_A | -1.27077 | 0.565228 | 3636415  |
| PET100      | -1.27215 | 0.440641 | 30515038 |
| C1_08240C_A | -1.27226 | 0.409471 | 3640759  |
| C3_00510W_A | -1.27557 | 0.493556 | 3640514  |
| NUP60       | -1.27801 | 0.278957 | 3642826  |
| ECM18       | -1.27867 | 0.707243 | 3645655  |
| C2_07790C_A | -1.27875 | 0.704255 | 3642326  |
| NTG1        | -1.27987 | 0.441775 | 3640746  |
| C2_00230W_A | -1.28056 | 0.316255 | 3638901  |
| HOL4        | -1.28081 | 0.211934 | 3645409  |
| IAH1        | -1.28152 | 0.25522  | 3638945  |
| C4_00740W_A | -1.28221 | 0.603872 | 3645764  |
| C3_00390W_A | -1.28231 | 0.607252 | 3640539  |
| C5_04350C_A | -1.28347 | 0.348774 | 3636482  |
| C3_06880W_A | -1.28358 | 0.758777 | 3638539  |
| SMX4        | -1.28457 | 0.471911 | 30515427 |
| C2_05820W_A | -1.28511 | 0.23584  | 3647482  |
| C6_01920C_A | -1.28634 | 0.278036 | 3644534  |
| C2_01030W_A | -1.28672 | 0.346494 | 3638836  |
| C2_08960C_A | -1.28681 | 0.404527 | 3645787  |
| PUT3        | -1.28769 | 0.254498 | 3639535  |
| C4_03080W_A | -1.28987 | 0.293281 | 3637928  |

|             |          |          |          |
|-------------|----------|----------|----------|
| C4_02700W_A | -1.2899  | 0.334538 | 3637859  |
| C6_03730C_A | -1.29097 | 0.390859 | 3640303  |
| ERG25       | -1.29114 | 0.347405 | 3644933  |
| C2_07860W_A | -1.29116 | 0.342597 | 3642320  |
| C1_10200C_A | -1.29187 | 0.328912 | 3634877  |
| C5_00260W_A | -1.29434 | 0.238508 | 3641561  |
| CYR1        | -1.29465 | 0.199396 | 3641407  |
| SWI1        | -1.29506 | 0.183337 | 3644996  |
| MED8        | -1.29521 | 0.548214 | 3645446  |
| YTA6        | -1.29551 | 0.218147 | 3638990  |
| HCR1        | -1.29612 | 0.19597  | 3638952  |
| CR_04170W_A | -1.29648 | 0.235971 | 3640977  |
| C1_01070C_A | -1.29749 | 0.449238 | 3640172  |
| PHO91       | -1.29839 | 0.17446  | 3644588  |
| C1_10840C_A | -1.29841 | 0.195476 | 3644452  |
| C1_07860W_A | -1.30019 | 0.737402 | 3640740  |
| C5_02360C_A | -1.3003  | 0.740843 | 3637792  |
| C7_00780W_A | -1.30265 | 0.314823 | 3637945  |
| C2_06850W_A | -1.30334 | 0.566303 | 30515142 |
| C1_05380C_A | -1.30452 | 0.317438 | 3642480  |
| C1_08920W_A | -1.30521 | 0.387838 | 3634910  |
| LYS144      | -1.30602 | 0.299037 | 3640512  |
| C2_05910W_A | -1.30978 | 0.283256 | 3647476  |
| C3_06260C_A | -1.31017 | 0.336051 | 3642240  |
| C4_05260W_A | -1.31253 | 0.315596 | 3648282  |
| C4_05650W_A | -1.31257 | 0.323603 | 3641814  |
| C6_01380C_A | -1.31289 | 0.432601 | 3641606  |
| C3_03110W_A | -1.31357 | 0.405609 | 3638400  |
| C3_05970C_A | -1.31416 | 0.147607 | 3641730  |
| BDF1        | -1.31469 | 0.1492   | 3641592  |
| SKN2        | -1.31497 | 0.32461  | 3638309  |
| C1_01680C_A | -1.3154  | 0.336893 | 3640198  |
| C5_01290C_A | -1.3155  | 0.135344 | 3642647  |
| GLY1        | -1.31754 | 0.194105 | 3647181  |
| CR_03230W_A | -1.31784 | 0.278042 | 3645127  |
| C2_07720C_A | -1.31824 | 0.292052 | 3642304  |
| C2_03880C_A | -1.31858 | 0.617139 | 30515108 |
| CR_10770W_A | -1.31859 | 0.250165 | 3638944  |
| C4_07200C_A | -1.3188  | 0.284953 | 3642958  |
| C3_02260C_A | -1.32202 | 0.169451 | 3636636  |
| GDH2        | -1.32216 | 0.206029 | 3642295  |
| C3_06440W_A | -1.32278 | 0.148416 | 3642281  |
| SWR1        | -1.32396 | 0.134007 | 3645220  |
| C1_04600C_A | -1.32492 | 0.216122 | 3646133  |
| C3_06140W_A | -1.3267  | 0.432507 | 3641764  |
| C5_03010W_A | -1.32697 | 0.312135 | 3637819  |
| C5_00170W_A | -1.3279  | 0.243993 | 3647870  |

|             |          |          |          |
|-------------|----------|----------|----------|
| CR_03310C_A | -1.32959 | 0.15615  | 3645097  |
| C1_05400C_A | -1.33103 | 0.521321 | 3642478  |
| SRP54       | -1.33257 | 0.165147 | 3640377  |
| C3_05060W_A | -1.33264 | 0.418434 | 3635241  |
| C1_14550C_A | -1.33287 | 0.486838 | 3643334  |
| RGT1        | -1.33296 | 0.196216 | 3637920  |
| SPT7        | -1.33343 | 0.184943 | 3638928  |
| AFG1        | -1.33358 | 0.316341 | 3634920  |
| RPB7        | -1.33382 | 0.328088 | 3640221  |
| C1_09280W_A | -1.33536 | 0.319411 | 3634829  |
| SPP1        | -1.33541 | 0.416516 | 3636897  |
| GPI8        | -1.33577 | 0.265883 | 3646669  |
| CR_01720W_A | -1.33605 | 0.260774 | 3640114  |
| BBC1        | -1.337   | 0.148067 | 3646661  |
| CAS4        | -1.337   | 0.115801 | 3636568  |
| C1_06410W_A | -1.33706 | 0.364245 | 3639555  |
| CR_04140W_A | -1.33816 | 0.232604 | 3640974  |
| C3_03230C_A | -1.339   | 0.275216 | 3638316  |
| C6_02900C_A | -1.33921 | 0.403653 | 3639240  |
| C4_06210C_A | -1.33987 | 0.155551 | 3642815  |
| MRR1        | -1.34084 | 0.296482 | 3641741  |
| CHS4        | -1.34251 | 0.13872  | 3641726  |
| C4_00950C_A | -1.34315 | 0.198831 | 3635675  |
| DUR7        | -1.34383 | 0.339454 | 3643335  |
| C4_00070C_A | -1.34473 | 0.112499 | 3648063  |
| C3_02990C_A | -1.34478 | 0.404017 | 3638388  |
| C7_03240W_A | -1.34644 | 0.10942  | 3641368  |
| RIM15       | -1.34843 | 0.117581 | 3637961  |
| C2_10650W_A | -1.34871 | 0.643771 | 30515168 |
| CR_01770C_A | -1.34934 | 0.12518  | 3640122  |
| YDJ1        | -1.34969 | 0.182892 | 3640939  |
| FKH2        | -1.3517  | 0.181458 | 3640536  |
| PRS1        | -1.35182 | 0.199977 | 3635817  |
| C2_08020C_A | -1.35243 | 0.187613 | 3642308  |
| AFL1        | -1.35285 | 0.145104 | 3641594  |
| C6_03430C_A | -1.35373 | 0.185473 | 3640273  |
| YTM1        | -1.35496 | 0.174757 | 3634765  |
| C2_06080C_A | -1.35601 | 0.216277 | 3644098  |
| C1_04850C_A | -1.35615 | 0.680744 | 30514989 |
| MRPS9       | -1.35644 | 0.207464 | 3642064  |
| C1_01540W_A | -1.35663 | 0.190266 | 3640233  |
| C2_07700C_A | -1.35771 | 0.760755 | 3642337  |
| C6_03070C_A | -1.35771 | 0.761108 | 3639272  |
| C2_08750W_A | -1.35783 | 0.759016 | 3643881  |
| C4_01800W_A | -1.35786 | 0.761176 | 3635595  |
| CR_06920W_A | -1.35786 | 0.761184 | 3647314  |
| DUR35       | -1.35786 | 0.761307 | 3635150  |

|             |          |          |          |
|-------------|----------|----------|----------|
| C1_06000W_A | -1.35794 | 0.761591 | 3639870  |
| C2_05040C_A | -1.35865 | 0.1511   | 3643449  |
| GLE1        | -1.35907 | 0.180085 | 3642340  |
| CR_05030W_A | -1.36062 | 0.142086 | 3646388  |
| C1_12870C_A | -1.36253 | 0.58744  | 3636180  |
| C1_14410W_A | -1.36289 | 0.27335  | 3643293  |
| C7_03580C_A | -1.36364 | 0.288646 | 3646238  |
| PAM17       | -1.36372 | 0.176408 | 3638369  |
| HCH1        | -1.36402 | 0.261369 | 3641626  |
| C6_04480C_A | -1.36511 | 0.167557 | 3645986  |
| C6_03390W_A | -1.36549 | 0.356341 | 3639232  |
| C4_00660W_A | -1.36661 | 0.23888  | 3645755  |
| C1_11200W_A | -1.36745 | 0.278854 | 3644396  |
| HST6        | -1.36967 | 0.762719 | 3642288  |
| LIP9        | -1.36967 | 0.762453 | 3641395  |
| PHO100      | -1.36967 | 0.762611 | 3644483  |
| C2_02720W_A | -1.36982 | 0.162205 | 3643002  |
| CSI2        | -1.37028 | 0.301334 | 3642016  |
| C1_00100C_A | -1.3707  | 0.284159 | 3639325  |
| C4_03710C_A | -1.37119 | 0.365531 | 3645360  |
| C2_05550W_A | -1.37156 | 0.260587 | 3645560  |
| MRS4        | -1.37228 | 0.2468   | 3642306  |
| C1_07390W_A | -1.37358 | 0.094635 | 3644466  |
| C5_03870C_A | -1.37365 | 0.171417 | 3647223  |
| C3_00420W_A | -1.3739  | 0.180744 | 3640553  |
| C5_04330W_A | -1.37397 | 0.356419 | 30515314 |
| C2_06650C_A | -1.37553 | 0.394477 | 3648419  |
| C5_03470C_A | -1.37584 | 0.228846 | 3646963  |
| VPS70       | -1.37643 | 0.109845 | 3637971  |
| FMO1        | -1.37693 | 0.581736 | 3635852  |
| HGT8        | -1.37797 | 0.127122 | 3638875  |
| INO1        | -1.37898 | 0.096495 | 3638966  |
| PRC2        | -1.37932 | 0.252227 | 3647044  |
| C4_03750C_A | -1.38004 | 0.371448 | 3645356  |
| CR_00230W_A | -1.38051 | 0.08612  | 3639698  |
| C2_09870W_A | -1.3809  | 0.205096 | 3643780  |
| PGA56       | -1.38165 | 0.121998 | 30515313 |
| CTA9        | -1.38218 | 0.159657 | 3640215  |
| C5_05070W_A | -1.38232 | 0.372518 | 3636491  |
| CR_06650C_A | -1.38271 | 0.288993 | 3646620  |
| C3_01520C_A | -1.38351 | 0.159152 | 3636570  |
| C1_03270W_A | -1.3836  | 0.110577 | 3636900  |
| GAL1        | -1.3858  | 0.10353  | 3644581  |
| C1_05650W_A | -1.38752 | 0.219996 | 3639838  |
| C2_03950W_A | -1.38761 | 0.250992 | 3637420  |
| C7_04140C_A | -1.38771 | 0.133785 | 3643129  |
| DIP5        | -1.38794 | 0.085611 | 3636798  |

|             |          |          |          |
|-------------|----------|----------|----------|
| C1_06980C_A | -1.3899  | 0.196967 | 3639565  |
| C5_02620C_A | -1.38996 | 0.193856 | 3637783  |
| PGA7        | -1.39001 | 0.114    | 3645006  |
| CR_03740C_A | -1.39045 | 0.198686 | 3643176  |
| NCE102      | -1.39085 | 0.14291  | 3635267  |
| CR_03780C_A | -1.39099 | 0.454557 | 3643179  |
| HN3         | -1.39201 | 0.302673 | 3640093  |
| C1_09950C_A | -1.39344 | 0.187821 | 3634861  |
| C1_13370W_A | -1.39405 | 0.322718 | 3636216  |
| SEH1        | -1.39467 | 0.160382 | 3642290  |
| BUD6        | -1.39524 | 0.179639 | 3640727  |
| C5_03940C_A | -1.40022 | 0.241116 | 3647446  |
| RPP1        | -1.40261 | 0.403814 | 3644681  |
| C4_06370C_A | -1.40296 | 0.306382 | 3642824  |
| HAC1        | -1.403   | 0.101378 | 3639849  |
| C5_01530C_A | -1.40327 | 0.206342 | 3647062  |
| RAD57       | -1.40358 | 0.240777 | 3642333  |
| RIM9        | -1.40364 | 0.230711 | 3644047  |
| C5_02190C_A | -1.40564 | 0.164606 | 30515303 |
| C4_04360W_A | -1.40694 | 0.666253 | 3646851  |
| C3_07240W_A | -1.40709 | 0.665688 | 3638530  |
| CPR6        | -1.40755 | 0.062563 | 3639020  |
| C2_08510W_A | -1.40843 | 0.449671 | 3643922  |
| C1_13240W_A | -1.40857 | 0.131407 | 3636167  |
| CR_06570C_A | -1.41043 | 0.188354 | 3648366  |
| VP2         | -1.41071 | 0.272243 | 3642021  |
| AGC1        | -1.41147 | 0.238993 | 3636219  |
| C2_03460C_A | -1.41253 | 0.121472 | 3637348  |
| SNX4        | -1.41266 | 0.106213 | 3638843  |
| CR_00370W_A | -1.41291 | 0.125559 | 3639684  |
| RPC53       | -1.41377 | 0.239007 | 3637898  |
| C4_06230C_A | -1.41671 | 0.150805 | 3642808  |
| XYL2        | -1.41699 | 0.105544 | 3638961  |
| SPT6        | -1.41868 | 0.091086 | 3643171  |
| C1_06800W_A | -1.41897 | 0.16133  | 3639496  |
| C3_00360W_A | -1.41937 | 0.258526 | 3640542  |
| CR_01790C_A | -1.4194  | 0.220464 | 3640161  |
| APC1        | -1.41987 | 0.131263 | 3639383  |
| CSC25       | -1.42041 | 0.115536 | 3645660  |
| HGT14       | -1.42101 | 0.275614 | 3648320  |
| C1_01390C_A | -1.42139 | 0.19156  | 3640236  |
| C3_03920W_A | -1.42165 | 0.278126 | 30515197 |
| SLK19       | -1.42186 | 0.102105 | 3638466  |
| CR_10230W_A | -1.4223  | 0.070793 | 3638921  |
| IMH3        | -1.42388 | 0.090893 | 3646556  |
| C5_01930W_A | -1.42597 | 0.161653 | 3643741  |
| C4_02580W_A | -1.42609 | 0.717458 | 3637915  |



|             |          |          |          |
|-------------|----------|----------|----------|
| MDN1        | -1.42622 | 0.052449 | 3635614  |
| CBK1        | -1.42645 | 0.063532 | 3634838  |
| WAL1        | -1.42665 | 0.060221 | 3647093  |
| TPO5        | -1.42669 | 0.307537 | 3647791  |
| VPS24       | -1.42751 | 0.115955 | 3638892  |
| C1_08900W_A | -1.42756 | 0.469355 | 3634925  |
| RPA135      | -1.42889 | 0.08732  | 3637996  |
| ZNC1        | -1.42901 | 0.086326 | 3643754  |
| C7_00030W_A | -1.42922 | 0.103659 | 3638004  |
| CHK1        | -1.4293  | 0.141075 | 3637394  |
| CR_10260W_A | -1.42968 | 0.433433 | 3638932  |
| GCD6        | -1.43058 | 0.062568 | 3646510  |
| C7_00830C_A | -1.43174 | 0.06533  | 3637938  |
| C1_08770W_A | -1.43197 | 0.242002 | 3634788  |
| BFA1        | -1.4326  | 0.174433 | 3639301  |
| HYR4        | -1.43347 | 0.161798 | 3640436  |
| C1_11270W_A | -1.43383 | 0.074312 | 3644555  |
| CRL1        | -1.43644 | 0.07863  | 3640238  |
| YPT7        | -1.437   | 0.366438 | 3636864  |
| SFU1        | -1.43731 | 0.173373 | 3634867  |
| DIT2        | -1.43887 | 0.522341 | 3640962  |
| ZCF38       | -1.43893 | 0.126005 | 3639705  |
| SWD1        | -1.43893 | 0.171192 | 3640535  |
| ILS1        | -1.44041 | 0.078601 | 3645956  |
| C3_03330C_A | -1.444   | 0.103186 | 3638364  |
| OPI1        | -1.44412 | 0.14361  | 3635777  |
| C1_06030C_A | -1.44552 | 0.485263 | 3639867  |
| MPH1        | -1.44651 | 0.179542 | 3642817  |
| C3_07660W_A | -1.44666 | 0.147332 | 3638462  |
| YFH1        | -1.44711 | 0.193351 | 3646853  |
| BEM1        | -1.44896 | 0.134943 | 3635627  |
| C5_00030W_A | -1.4497  | 0.086289 | 3647879  |
| C2_07640W_A | -1.45105 | 0.064714 | 3645192  |
| C2_08100W_A | -1.45181 | 0.132049 | 3642334  |
| C2_07370W_A | -1.45221 | 0.161508 | 3645233  |
| C4_03140C_A | -1.45247 | 0.240987 | 3637843  |
| MSS11       | -1.45376 | 0.205173 | 3647296  |
| C2_01190C_A | -1.45443 | 0.230957 | 3638859  |
| C5_03040W_A | -1.45472 | 0.238192 | 3637824  |
| CR_00160C_A | -1.45507 | 0.109973 | 3639706  |
| C7_04200C_A | -1.45731 | 0.08548  | 3643122  |
| C3_05940C_A | -1.45751 | 0.408986 | 3641744  |
| SKP1        | -1.46519 | 0.045848 | 3644485  |
| HGC1        | -1.46543 | 0.33773  | 3639349  |
| C1_11680C_A | -1.46586 | 0.261092 | 30515056 |
| CR_09530C_A | -1.46753 | 0.093894 | 3647101  |
| C1_10330C_A | -1.46803 | 0.214437 | 3634908  |

|             |          |          |          |
|-------------|----------|----------|----------|
| HTS1        | -1.46809 | 0.054948 | 3636532  |
| C1_06660W_A | -1.46839 | 0.100846 | 3639542  |
| C3_06050C_A | -1.47018 | 0.162972 | 3641746  |
| SCO1        | -1.4704  | 0.079016 | 3641922  |
| CR_04160C_A | -1.47089 | 0.074891 | 3640976  |
| CR_02590C_A | -1.47211 | 0.161607 | 3642595  |
| PUT4        | -1.47335 | 0.427846 | 3636801  |
| ECM17       | -1.47367 | 0.031974 | 3644077  |
| C3_03470W_A | -1.474   | 0.455897 | 3638306  |
| CR_05440W_A | -1.47464 | 0.08131  | 3648245  |
| C2_04400W_A | -1.47844 | 0.070177 | 3645457  |
| C4_03930C_A | -1.47919 | 0.265045 | 30515262 |
| C1_12710C_A | -1.47987 | 0.13235  | 3646822  |
| C3_07170C_A | -1.48056 | 0.092568 | 3638536  |
| PUS7        | -1.48096 | 0.070741 | 3643960  |
| UTP20       | -1.48142 | 0.054061 | 3647956  |
| C7_01280C_A | -1.48204 | 0.137172 | 3645909  |
| HMI1        | -1.4826  | 0.140551 | 3638997  |
| C3_03770C_A | -1.48416 | 0.075178 | 3645636  |
| ECM42       | -1.48611 | 0.157626 | 3636995  |
| APN2        | -1.48708 | 0.280789 | 3647674  |
| SPA2        | -1.48769 | 0.033017 | 3646824  |
| PGA18       | -1.48788 | 0.104222 | 3638394  |
| CR_07760W_A | -1.48954 | 0.426373 | 30515431 |
| C3_04230W_A | -1.48965 | 0.129345 | 3635187  |
| MRPL3       | -1.49071 | 0.116189 | 3640722  |
| PDE1        | -1.4918  | 0.163538 | 3637713  |
| C6_00690W_A | -1.49391 | 0.396613 | 3647075  |
| C5_01310W_A | -1.49439 | 0.386664 | 3642645  |
| CDH1        | -1.49547 | 0.124318 | 3638814  |
| PWP1        | -1.49573 | 0.034497 | 3635623  |
| CR_04150W_A | -1.49614 | 0.434373 | 3640975  |
| C3_07100C_A | -1.4962  | 0.071503 | 3638443  |
| GSC1        | -1.49658 | 0.036776 | 3636794  |
| C2_05080C_A | -1.4967  | 0.356941 | 3643453  |
| CDR2        | -1.49689 | 0.110036 | 3635265  |
| C1_07080W_A | -1.49752 | 0.190322 | 3639489  |
| FGR6-4      | -1.49955 | 0.26229  | 30515164 |
| C2_06160W_A | -1.50092 | 0.428828 | 3644079  |
| C1_02950W_A | -1.50111 | 0.445583 | 3636833  |
| C4_06960W_A | -1.50126 | 0.428721 | 3642926  |
| PSD1        | -1.50126 | 0.027659 | 3639382  |
| C5_05360C_A | -1.50323 | 0.039724 | 3636402  |
| C6_00360C_A | -1.50442 | 0.134364 | 3646083  |
| MNT3        | -1.50456 | 0.229464 | 3648123  |
| CR_02270C_A | -1.50513 | 0.218424 | 3644911  |
| C5_02310C_A | -1.50748 | 0.262884 | 3637787  |

|             |          |          |          |
|-------------|----------|----------|----------|
| DUG3        | -1.51033 | 0.0566   | 3641381  |
| CR_02960W_A | -1.51246 | 0.270016 | 3642591  |
| PRA1        | -1.51254 | 0.352269 | 3642969  |
| HAP5        | -1.51314 | 0.113125 | 3642654  |
| C3_07590W_A | -1.51477 | 0.305088 | 3638496  |
| PBP2        | -1.5165  | 0.038035 | 3640267  |
| VPS13       | -1.51803 | 0.029195 | 3646528  |
| CR_04310C_A | -1.51941 | 0.126868 | 3640996  |
| C2_08740W_A | -1.51945 | 0.20913  | 3643882  |
| ZCF23       | -1.5218  | 0.095678 | 3644477  |
| C2_06780C_A | -1.52283 | 0.153259 | 3643516  |
| C4_06840W_A | -1.5231  | 0.281246 | 3642913  |
| DUO1        | -1.52395 | 0.333213 | 3646858  |
| C2_00940W_A | -1.52738 | 0.04263  | 3638891  |
| MAS2        | -1.52795 | 0.136909 | 3647249  |
| DJP1        | -1.52839 | 0.0658   | 3647186  |
| C3_03310C_A | -1.52986 | 0.247994 | 3638363  |
| TAF145      | -1.53158 | 0.052108 | 3639486  |
| C2_03410W_A | -1.53278 | 0.023194 | 3637412  |
| C7_00460W_A | -1.53292 | 0.606044 | 3637990  |
| C6_04410C_A | -1.53306 | 0.161099 | 3645950  |
| C1_11110C_A | -1.53353 | 0.244248 | 3644413  |
| TIF4631     | -1.53567 | 0.031609 | 3643880  |
| C3_06270C_A | -1.53585 | 0.079996 | 3642239  |
| C5_00760W_A | -1.53633 | 0.080156 | 3644122  |
| C5_03640W_A | -1.53704 | 0.081979 | 3646984  |
| C3_03200C_A | -1.53749 | 0.359611 | 3638428  |
| STI1        | -1.5398  | 0.016657 | 3643758  |
| GCD2        | -1.5399  | 0.050965 | 3638437  |
| C5_03300C_A | -1.54073 | 0.097406 | 3646357  |
| SNF7        | -1.54218 | 0.057546 | 3639377  |
| C7_04290W_A | -1.54221 | 0.16129  | 3643172  |
| SOD6        | -1.5425  | 0.085162 | 3638899  |
| CEM1        | -1.54268 | 0.199825 | 3635242  |
| C2_00600C_A | -1.54459 | 0.022916 | 3638850  |
| CR_09580C_A | -1.54549 | 0.090012 | 3647097  |
| YCF1        | -1.54669 | 0.030023 | 3636934  |
| USO6        | -1.54844 | 0.050118 | 3643647  |
| C1_06770W_A | -1.5487  | 0.042051 | 3639504  |
| C1_08350C_A | -1.5491  | 0.0244   | 30515030 |
| C3_01800C_A | -1.54954 | 0.147044 | 3636586  |
| CR_00630W_A | -1.55341 | 0.079872 | 3639690  |
| FAA2        | -1.55612 | 0.099476 | 3641731  |
| FRE3        | -1.55702 | 0.233523 | 3641789  |
| RAD18       | -1.55709 | 0.238704 | 3641637  |
| C7_02450W_A | -1.55799 | 0.028533 | 3636972  |
| CDC37       | -1.5583  | 0.02255  | 3639210  |

|             |          |          |          |
|-------------|----------|----------|----------|
| ZCF21       | -1.55962 | 0.019691 | 3645762  |
| SDH1        | -1.56139 | 0.050481 | 3642477  |
| POL93       | -1.56176 | 0.024619 | 3639299  |
| C2_01250W_A | -1.5624  | 0.174282 | 3638793  |
| HAS1        | -1.56243 | 0.015931 | 3636443  |
| FCA1        | -1.56257 | 0.035832 | 30515327 |
| HEX1        | -1.56345 | 0.084122 | 3646981  |
| CR_08290W_A | -1.56389 | 0.045551 | 3642103  |
| C2_01070W_A | -1.56491 | 0.035304 | 3638834  |
| C6_04450W_A | -1.56618 | 0.061023 | 3645982  |
| C3_07280C_A | -1.56687 | 0.07232  | 3638431  |
| C1_12540W_A | -1.56785 | 0.33013  | 3647607  |
| ZPR1        | -1.56808 | 0.033643 | 3640177  |
| CR_04830C_A | -1.56834 | 0.316831 | 3647297  |
| C3_05950W_A | -1.57207 | 0.175754 | 3641728  |
| C3_07390C_A | -1.57498 | 0.080505 | 3638472  |
| C2_10680W_A | -1.57586 | 0.055589 | 3641252  |
| C2_07920W_A | -1.57621 | 0.161916 | 3642294  |
| CR_09410W_A | -1.57637 | 0.115455 | 3641933  |
| C3_04920C_A | -1.5765  | 0.011125 | 3635268  |
| C4_04240C_A | -1.57676 | 0.068915 | 3646856  |
| FCR1        | -1.57711 | 0.015434 | 3638542  |
| C4_02210W_A | -1.57737 | 0.644453 | 3635695  |
| C1_12820C_A | -1.57751 | 0.087716 | 3646826  |
| PGA17       | -1.57763 | 0.657618 | 3637391  |
| PRY1        | -1.57773 | 0.656866 | 3646674  |
| C3_00030C_A | -1.58002 | 0.035077 | 3640571  |
| MBF1        | -1.58062 | 0.017742 | 3640171  |
| C1_02800W_A | -1.581   | 0.433597 | 3636873  |
| C7_01570C_A | -1.58122 | 0.427849 | 3637040  |
| MTLA1       | -1.58191 | 0.213358 | 3643729  |
| CDC43       | -1.58197 | 0.32749  | 3648206  |
| BUD31       | -1.58245 | 0.329508 | 3634796  |
| C5_03110C_A | -1.58461 | 0.340253 | 30515306 |
| VPS20       | -1.58538 | 0.095169 | 3637427  |
| LSM6        | -1.58733 | 0.088953 | 30515363 |
| CFL1        | -1.5882  | 0.223206 | 3641810  |
| CDC4        | -1.58924 | 0.031033 | 3640125  |
| C4_03370C_A | -1.58948 | 0.17706  | 3646796  |
| MBP1        | -1.5918  | 0.046424 | 3635281  |
| C5_03440W_A | -1.59277 | 0.12069  | 30515310 |
| C7_01700W_A | -1.5934  | 0.007478 | 3637013  |
| FCY21       | -1.59451 | 0.042359 | 3643822  |
| KOG1        | -1.59471 | 0.024384 | 3642488  |
| UTP21       | -1.59609 | 0.01471  | 3635757  |
| SAP1        | -1.59612 | 0.448397 | 3640256  |
| C5_03700C_A | -1.59625 | 0.115305 | 3646990  |

|             |          |          |          |
|-------------|----------|----------|----------|
| C6_04470C_A | -1.59631 | 0.020322 | 3645985  |
| RSP5        | -1.59798 | 0.011182 | 3643898  |
| C4_00030C_A | -1.59835 | 0.047533 | 3648055  |
| C4_01710C_A | -1.59885 | 0.010031 | 3635708  |
| C2_00190C_A | -1.59985 | 0.027971 | 3638904  |
| C3_03530W_A | -1.59985 | 0.329084 | 3638312  |
| C5_02990W_A | -1.60021 | 0.333333 | 3637817  |
| C1_05120W_A | -1.60025 | 0.030601 | 3647667  |
| CR_09100C_A | -1.60088 | 0.125658 | 3641928  |
| C2_09310C_A | -1.60226 | 0.236915 | 3644104  |
| C7_01720W_A | -1.60296 | 0.049865 | 3637011  |
| C5_05250C_A | -1.604   | 0.089293 | 3636472  |
| ORM1        | -1.6046  | 0.011973 | 3640307  |
| ARL1        | -1.60647 | 0.05775  | 3635637  |
| C7_03040W_A | -1.60909 | 0.296179 | 3641379  |
| GDT1        | -1.6102  | 0.093418 | 3645445  |
| C3_01660W_A | -1.61085 | 0.14466  | 3636607  |
| C2_09460C_A | -1.61212 | 0.062278 | 3647713  |
| C3_00380C_A | -1.61275 | 0.118178 | 3640540  |
| C2_01440C_A | -1.61295 | 0.302016 | 30515090 |
| CR_07850W_A | -1.61512 | 0.083572 | 3647347  |
| C2_07240C_A | -1.61539 | 0.493017 | 3643486  |
| HNM4        | -1.61546 | 0.469741 | 3636802  |
| C1_05220C_A | -1.61549 | 0.480133 | 3642464  |
| CDC39       | -1.6171  | 0.008991 | 3646278  |
| C3_07940W_A | -1.61728 | 0.024634 | 3647453  |
| C6_01980C_A | -1.61731 | 0.049968 | 3644560  |
| TFG1        | -1.61752 | 0.019162 | 3635645  |
| CR_02460W_A | -1.61876 | 0.022315 | 3644922  |
| C7_03280C_A | -1.61895 | 0.006331 | 3641353  |
| PRN3        | -1.6204  | 0.219674 | 3639878  |
| AFT2        | -1.62196 | 0.085101 | 3643511  |
| CR_00980C_A | -1.623   | 0.007089 | 3640426  |
| ROM2        | -1.62376 | 0.010508 | 3637434  |
| C6_01090C_A | -1.62454 | 0.340356 | 3644020  |
| C7_03970C_A | -1.62458 | 0.037996 | 3643117  |
| NIK1        | -1.62505 | 0.039676 | 3641358  |
| FUR4        | -1.62695 | 0.094759 | 3638305  |
| YHB5        | -1.62775 | 0.052211 | 3647343  |
| SNF2        | -1.62798 | 0.008777 | 3635855  |
| BGL22       | -1.63131 | 0.071404 | 3641935  |
| MRP20       | -1.63143 | 0.077974 | 3640224  |
| C1_14250C_A | -1.6319  | 0.007267 | 3643307  |
| CR_04580W_A | -1.63213 | 0.043138 | 3640948  |
| SSD1        | -1.6348  | 0.019201 | 3636520  |
| C7_01490W_A | -1.63506 | 0.046815 | 3637051  |
| GAP1        | -1.63516 | 0.007235 | 3637806  |

|             |          |          |         |
|-------------|----------|----------|---------|
| YMX6        | -1.6359  | 0.136419 | 3640255 |
| RLP24       | -1.6361  | 0.02302  | 3645748 |
| C4_07060W_A | -1.63798 | 0.007275 | 3642908 |
| C1_02090C_A | -1.6386  | 0.115283 | 3644577 |
| C6_02450W_A | -1.64171 | 0.098365 | 3639167 |
| GLN3        | -1.64326 | 0.011885 | 3636453 |
| C2_03560C_A | -1.64494 | 0.051364 | 3637337 |
| PGA4        | -1.64583 | 0.013283 | 3636406 |
| C3_04750W_A | -1.64681 | 0.133712 | 3635252 |
| HMX1        | -1.64982 | 0.008463 | 3639294 |
| ZCF18       | -1.65094 | 0.057993 | 3641635 |
| C1_01590C_A | -1.65119 | 0.010763 | 3640223 |
| DCK2        | -1.65149 | 0.039725 | 3637384 |
| C2_06550W_A | -1.65258 | 0.262221 | 3646559 |
| C1_01040W_A | -1.65335 | 0.076111 | 3640183 |
| MOB2        | -1.65337 | 0.050864 | 3639381 |
| C3_03440C_A | -1.6537  | 0.219046 | 3638356 |
| C2_05300C_A | -1.65475 | 0.01634  | 3643423 |
| HSE1        | -1.65614 | 0.008538 | 3640407 |
| FGR16       | -1.65714 | 0.312096 | 3644411 |
| SGE1        | -1.6575  | 0.058948 | 3642614 |
| C7_02690C_A | -1.65761 | 0.155713 | 3647649 |
| C7_01030C_A | -1.65865 | 0.009788 | 3638019 |
| ADE8        | -1.65961 | 0.010803 | 3642999 |
| C4_04350W_A | -1.65982 | 0.044281 | 3646852 |
| CR_01780W_A | -1.6599  | 0.152403 | 3640157 |
| CR_04370W_A | -1.6624  | 0.093004 | 3641004 |
| C3_07430W_A | -1.66308 | 0.006763 | 3638484 |
| C2_01740C_A | -1.66335 | 0.170126 | 3635733 |
| C1_05980W_A | -1.66344 | 0.062199 | 3639872 |
| CHO2        | -1.66573 | 0.031835 | 3647690 |
| TERT        | -1.6668  | 0.055427 | 3640729 |
| TIM23       | -1.66688 | 0.039823 | 3643777 |
| VPS28       | -1.66695 | 0.019203 | 3645794 |
| C4_04820C_A | -1.66797 | 0.089717 | 3641165 |
| YCK2        | -1.66894 | 0.006823 | 3643655 |
| CR_03620C_A | -1.67006 | 0.018613 | 3643182 |
| C2_02540W_A | -1.6701  | 0.014629 | 3635820 |
| C2_05380W_A | -1.67126 | 0.094114 | 3643432 |
| C1_01750W_A | -1.67437 | 0.180677 | 3645413 |
| MNN11       | -1.67498 | 0.169467 | 3636792 |
| YVH1        | -1.67537 | 0.068388 | 3643218 |
| HOS3        | -1.67663 | 0.020632 | 3637886 |
| AMS1        | -1.67699 | 0.044604 | 3637882 |
| CKB2        | -1.67716 | 0.054629 | 3637741 |
| NAM7        | -1.67754 | 0.007268 | 3641540 |
| TAC1        | -1.67813 | 0.028413 | 3643755 |

|             |          |          |          |
|-------------|----------|----------|----------|
| CKB1        | -1.67884 | 0.029926 | 3638799  |
| C7_03680W_A | -1.67926 | 0.119753 | 3646228  |
| PHHB        | -1.67965 | 0.007157 | 3638871  |
| MNN23       | -1.68206 | 0.029808 | 3634813  |
| C1_04370C_A | -1.68234 | 0.027836 | 3647994  |
| CR_04270C_A | -1.68245 | 0.34881  | 3640992  |
| C1_04220C_A | -1.68312 | 0.04748  | 3644721  |
| PLB1        | -1.68339 | 0.519373 | 3644561  |
| C6_03740W_A | -1.68343 | 0.532647 | 3640304  |
| DUR4        | -1.68397 | 0.143563 | 3645012  |
| C2_00490W_A | -1.68411 | 0.002102 | 3638870  |
| C2_06600W_A | -1.68545 | 0.009532 | 3646563  |
| C3_04170W_A | -1.68574 | 0.634574 | 3635182  |
| C2_05400W_A | -1.68684 | 0.212777 | 3643435  |
| C3_02180C_A | -1.68816 | 0.039915 | 3636643  |
| C4_02590C_A | -1.68867 | 0.106713 | 3637913  |
| C1_06470W_A | -1.69203 | 0.013337 | 30515007 |
| CR_02950C_A | -1.69206 | 0.051262 | 3642590  |
| UPC2        | -1.69264 | 0.004482 | 3646489  |
| C7_00610C_A | -1.69383 | 0.042338 | 3638030  |
| C6_01080C_A | -1.69517 | 0.204517 | 3644019  |
| C1_03040W_A | -1.69559 | 0.102398 | 3636842  |
| NOC2        | -1.69821 | 0.009529 | 3647596  |
| C4_01280C_A | -1.69849 | 0.050489 | 3635700  |
| HLJ1        | -1.69883 | 0.024195 | 3643158  |
| CR_04240C_A | -1.70405 | 0.009934 | 3640989  |
| CR_08940W_A | -1.70494 | 0.021922 | 3641914  |
| CIS2        | -1.70729 | 0.035748 | 3639366  |
| C7_00350C_A | -1.70753 | 0.027165 | 3638039  |
| C1_00460W_A | -1.71056 | 0.028249 | 3639316  |
| C1_00580W_A | -1.7136  | 0.077831 | 3639361  |
| C1_03310W_A | -1.71362 | 0.010192 | 3636856  |
| MRT4        | -1.71369 | 0.0142   | 3639219  |
| ZFU2        | -1.71683 | 0.101159 | 3638534  |
| C4_03850W_A | -1.7178  | 0.005006 | 3647853  |
| NOP15       | -1.71793 | 0.02481  | 3637966  |
| C4_07130W_A | -1.71845 | 0.004623 | 3642938  |
| CR_01090W_A | -1.71868 | 0.018622 | 3640379  |
| C1_13530W_A | -1.71925 | 0.016591 | 3636170  |
| FGR27       | -1.7195  | 0.023807 | 3646988  |
| C3_06240C_A | -1.72382 | 0.287975 | 30515213 |
| C6_00640C_A | -1.72398 | 0.043283 | 3647134  |
| C3_01190C_A | -1.72479 | 0.01495  | 3647961  |
| C4_03410W_A | -1.72535 | 0.026313 | 3646807  |
| C7_02540W_A | -1.72904 | 0.146069 | 3636939  |
| C3_05360C_A | -1.72909 | 0.008409 | 3643676  |
| BUD23       | -1.72919 | 0.132646 | 3642629  |

|             |          |          |          |
|-------------|----------|----------|----------|
| CR_07190W_A | -1.72929 | 0.014817 | 3645269  |
| C4_01090C_A | -1.72933 | 0.200909 | 3635685  |
| C7_02340C_A | -1.73056 | 0.040967 | 3636933  |
| C2_04730W_A | -1.73245 | 0.045313 | 3647787  |
| MUB1        | -1.73331 | 0.008098 | 3642246  |
| PGA25       | -1.73389 | 0.029401 | 3647890  |
| MST1        | -1.73482 | 0.036569 | 3636831  |
| ADAEC       | -1.73482 | 0.008011 | 3637342  |
| GCD7        | -1.73584 | 0.012434 | 3637367  |
| C2_04850C_A | -1.73717 | 0.003986 | 3648114  |
| ARG5,6      | -1.73802 | 0.00645  | 3634830  |
| C1_05200C_A | -1.74066 | 0.01811  | 3642466  |
| BUD2        | -1.74102 | 0.033273 | 3641541  |
| CR_02800C_A | -1.74121 | 0.028703 | 3642559  |
| AFG3        | -1.74242 | 0.002571 | 3636589  |
| C6_00310W_A | -1.74296 | 0.007768 | 3646071  |
| RNR22       | -1.74551 | 0.012296 | 3645217  |
| C5_01170W_A | -1.74643 | 0.219127 | 3642662  |
| C4_06680C_A | -1.74684 | 0.004463 | 3642950  |
| DAL81       | -1.74699 | 0.032271 | 3640419  |
| OSM1        | -1.74771 | 0.022868 | 3645573  |
| CR_00670C_A | -1.74906 | 0.087393 | 3639655  |
| VID27       | -1.74919 | 0.005047 | 3647894  |
| CR_03120W_A | -1.74966 | 0.00126  | 3645123  |
| C1_08710W_A | -1.75013 | 0.055318 | 3634937  |
| C2_02730W_A | -1.75014 | 0.003355 | 3643035  |
| GNP1        | -1.75049 | 0.007368 | 3646073  |
| SDH4        | -1.75118 | 0.096498 | 3636497  |
| C2_00620C_A | -1.7517  | 0.199363 | 3638849  |
| C3_05140C_A | -1.75175 | 0.031051 | 3635161  |
| C4_03780C_A | -1.75369 | 0.026254 | 3645353  |
| C1_04360C_A | -1.75439 | 0.002897 | 30514985 |
| C3_04790W_A | -1.75492 | 0.029144 | 3635215  |
| RLI1        | -1.75574 | 0.003423 | 3636888  |
| C1_06910C_A | -1.75613 | 0.010143 | 3639526  |
| C6_00550W_A | -1.75621 | 0.007352 | 3647144  |
| RPF2        | -1.75808 | 0.010305 | 3643467  |
| RMT2        | -1.75935 | 0.022132 | 3641569  |
| C6_02930W_A | -1.76123 | 0.00614  | 3639243  |
| YAK1        | -1.76245 | 0.004714 | 3647801  |
| C2_00700W_A | -1.76403 | 0.001879 | 3638884  |
| C1_05230W_A | -1.76556 | 0.174298 | 3642463  |
| C7_03730C_A | -1.76598 | 0.017376 | 3647867  |
| MTR10       | -1.7662  | 0.0113   | 3647235  |
| FRP6        | -1.76666 | 0.009488 | 3641601  |
| C2_00220C_A | -1.76708 | 0.012522 | 3638902  |
| BCR1        | -1.76741 | 0.006516 | 3645280  |



|             |          |          |          |
|-------------|----------|----------|----------|
| BNA4        | -1.76898 | 0.001422 | 3640528  |
| C2_00170C_A | -1.77123 | 0.010163 | 3638906  |
| CR_00600C_A | -1.77513 | 0.00889  | 3639660  |
| PHR2        | -1.77921 | 0.027989 | 3639334  |
| CST5        | -1.77933 | 0.035131 | 3645981  |
| UBR1        | -1.78328 | 0.002664 | 3637871  |
| C2_09670C_A | -1.7842  | 0.009629 | 3643792  |
| PGA62       | -1.78566 | 0.017804 | 3637879  |
| CET1        | -1.78637 | 0.002848 | 3640140  |
| CR_08330W_A | -1.79104 | 0.025293 | 3642080  |
| GPI13       | -1.79125 | 0.114726 | 3637424  |
| DCP2        | -1.79276 | 0.003512 | 3642069  |
| C1_03120W_A | -1.79294 | 0.008129 | 3636926  |
| FET33       | -1.793   | 0.048738 | 3641544  |
| CR_04350C_A | -1.79503 | 0.006538 | 3641001  |
| C3_01850W_A | -1.79924 | 0.046899 | 3636565  |
| C7_03880C_A | -1.80354 | 0.166408 | 3643142  |
| C1_02940C_A | -1.80615 | 0.018063 | 3636832  |
| CYM1        | -1.80689 | 0.004782 | 3642244  |
| C6_03910C_A | -1.80816 | 0.047731 | 3640263  |
| C3_00530C_A | -1.81029 | 0.028304 | 3640588  |
| C2_10140W_A | -1.81098 | 0.145438 | 3643934  |
| C1_05800C_A | -1.81124 | 0.14755  | 3639887  |
| C4_01130C_A | -1.8128  | 0.136813 | 3635682  |
| PBS2        | -1.81328 | 0.001197 | 3641748  |
| SUI3        | -1.81418 | 0.005341 | 3643130  |
| CCW14       | -1.81623 | 0.119115 | 3642650  |
| C2_07000W_A | -1.81723 | 0.034705 | 3643534  |
| CR_03350C_A | -1.8178  | 0.025035 | 3645142  |
| HRQ2        | -1.81845 | 0.074908 | 3647850  |
| C6_02110W_A | -1.81967 | 0.095569 | 3647553  |
| C7_02460C_A | -1.82008 | 0.003911 | 3636946  |
| CR_03110W_A | -1.82102 | 0.09389  | 3645124  |
| UTR2        | -1.82398 | 0.009899 | 3636591  |
| HMS1        | -1.82445 | 0.001876 | 3641570  |
| C1_09340C_A | -1.82706 | 0.010533 | 3634804  |
| CR_03640C_A | -1.82711 | 0.003076 | 3643190  |
| C4_00750C_A | -1.82843 | 0.091015 | 3645763  |
| C3_01090W_A | -1.82943 | 0.04611  | 30515176 |
| HGT6        | -1.83038 | 0.010539 | 3638873  |
| C3_04700W_A | -1.83313 | 0.020251 | 3635247  |
| CR_02940C_A | -1.83405 | 0.339731 | 3642589  |
| C1_03050W_A | -1.83645 | 0.004884 | 3636843  |
| C4_02110W_A | -1.83726 | 0.016326 | 3635673  |
| POP2        | -1.83727 | 0.00807  | 3640301  |
| NEP1        | -1.83786 | 0.012814 | 3644545  |
| C2_07680W_A | -1.83822 | 0.017396 | 3642339  |

|             |          |          |          |
|-------------|----------|----------|----------|
| C5_02010C_A | -1.83846 | 0.004983 | 3643772  |
| BLM3        | -1.83968 | 0.001596 | 3642310  |
| C3_04940W_A | -1.84226 | 0.009192 | 3635270  |
| C5_03570W_A | -1.84244 | 0.006477 | 3646976  |
| C4_01560C_A | -1.84478 | 0.030235 | 3635714  |
| NMA111      | -1.84539 | 0.001284 | 3640179  |
| CHS3        | -1.84669 | 0.0048   | 3636199  |
| C2_02520W_A | -1.84731 | 0.01429  | 3635818  |
| C7_00940W_A | -1.84852 | 0.000528 | 3637955  |
| C1_06070W_A | -1.84863 | 0.008723 | 3639824  |
| C1_02900C_A | -1.84896 | 0.021482 | 3636869  |
| C2_01820C_A | -1.84968 | 0.018151 | 3635831  |
| CR_04750W_A | -1.8521  | 0.169735 | 30515399 |
| C1_10080W_A | -1.85252 | 0.075446 | 3634814  |
| ESA1        | -1.8528  | 0.002707 | 3640518  |
| LEU42       | -1.85354 | 0.002535 | 3643808  |
| YAF9        | -1.85463 | 0.052256 | 3647864  |
| CR_08400C_A | -1.85694 | 0.023167 | 3642115  |
| RAX1        | -1.85818 | 0.004237 | 3635256  |
| C1_13330C_A | -1.85881 | 0.003056 | 3636150  |
| CR_07250C_A | -1.85886 | 0.00758  | 3646028  |
| ARX1        | -1.85894 | 0.001419 | 3636811  |
| C3_05400C_A | -1.86019 | 0.385365 | 3643681  |
| C1_05540C_A | -1.86553 | 0.003521 | 3642503  |
| C5_01040W_A | -1.86639 | 0.451723 | 3642649  |
| BLP1        | -1.86667 | 0.002801 | 30515065 |
| C3_02930W_A | -1.86673 | 0.451639 | 3638380  |
| STE2        | -1.86685 | 0.444437 | 3646630  |
| SAP3        | -1.86696 | 0.452893 | 3635197  |
| NCR1        | -1.86846 | 0.001434 | 3643314  |
| C4_00880W_A | -1.87334 | 0.012157 | 3635681  |
| CHT1        | -1.8756  | 0.119852 | 3639704  |
| ECM3        | -1.8777  | 0.014855 | 3635754  |
| WOR4        | -1.87889 | 0.005062 | 3638454  |
| PPR1        | -1.87972 | 0.00892  | 3636535  |
| CR_03930C_A | -1.8811  | 0.014253 | 3640957  |
| DAO2        | -1.88117 | 0.035047 | 3646797  |
| HPA2        | -1.88144 | 0.069742 | 3647907  |
| SAP6        | -1.88176 | 0.542229 | 3639229  |
| C7_01010W_A | -1.8818  | 0.524187 | 3638021  |
| C2_02420C_A | -1.88189 | 0.006449 | 3635756  |
| IFF11       | -1.88191 | 0.524838 | 3640580  |
| OP4         | -1.88195 | 0.522065 | 3636125  |
| MRV1        | -1.88207 | 0.521062 | 3635610  |
| UTP13       | -1.88306 | 0.001458 | 3637718  |
| CR_08040W_A | -1.88663 | 0.003682 | 3644135  |
| C2_07740W_A | -1.8888  | 0.000307 | 3642302  |

|             |          |          |          |
|-------------|----------|----------|----------|
| RGD3        | -1.8922  | 0.000463 | 3648003  |
| C3_07700W_A | -1.89227 | 0.054694 | 3638457  |
| CTA6        | -1.89265 | 0.04635  | 3642907  |
| MAS1        | -1.89383 | 0.000389 | 3636855  |
| PIF1        | -1.89428 | 0.009284 | 3646054  |
| SST2        | -1.89479 | 0.055218 | 3637754  |
| CR_10730C_A | -1.89541 | 0.001644 | 3638998  |
| STF2        | -1.89802 | 0.001705 | 30515083 |
| MLP1        | -1.89943 | 0.001875 | 3635688  |
| CR_09480W_A | -1.90001 | 0.017385 | 3641939  |
| UBC8        | -1.90005 | 0.000292 | 3645433  |
| ABD1        | -1.90094 | 0.003663 | 3638456  |
| STE4        | -1.90126 | 0.042094 | 3637358  |
| C1_00200C_A | -1.90275 | 0.146027 | 3639336  |
| SAM50       | -1.90379 | 0.155835 | 3641721  |
| C2_07430C_A | -1.90656 | 0.004998 | 3645201  |
| C6_03520C_A | -1.90945 | 0.194795 | 3640259  |
| C1_07810C_A | -1.90951 | 0.030563 | 3640708  |
| RPM2        | -1.91146 | 0.000994 | 3644790  |
| MSU1        | -1.91285 | 0.075244 | 3643919  |
| C3_00450C_A | -1.91338 | 0.001059 | 3640548  |
| NMD5        | -1.91644 | 0.003666 | 3645745  |
| C7_02350C_A | -1.91907 | 0.004643 | 3636932  |
| C6_02720C_A | -1.91959 | 0.00793  | 3639212  |
| CR_06040W_A | -1.92261 | 0.002407 | 3644836  |
| C2_04750W_A | -1.92679 | 0.035261 | 3647785  |
| C2_06200C_A | -1.92887 | 0.012027 | 3646908  |
| CR_05910W_A | -1.93002 | 0.017096 | 3646680  |
| PTC2        | -1.93361 | 0.000258 | 3640105  |
| C6_02090C_A | -1.93483 | 0.010305 | 6335445  |
| RLM1        | -1.93539 | 0.019399 | 3635703  |
| CR_00820C_A | -1.93609 | 0.007496 | 3640413  |
| CCT8        | -1.93669 | 0.00043  | 3639324  |
| C3_07920W_A | -1.94046 | 0.000361 | 30515226 |
| IRE1        | -1.94082 | 0.00153  | 3640726  |
| C4_02960W_A | -1.94225 | 0.002103 | 3637873  |
| C3_07680W_A | -1.94234 | 0.000751 | 3638459  |
| CR_08200C_A | -1.94436 | 0.000463 | 3642087  |
| C2_00810C_A | -1.94466 | 0.032658 | 3638810  |
| CR_08190W_A | -1.94559 | 0.125177 | 3642084  |
| C2_09820W_A | -1.94591 | 0.022948 | 3643801  |
| EXO70       | -1.95319 | 0.006326 | 3636948  |
| C4_00680W_A | -1.95351 | 0.009791 | 3645753  |
| C2_07410W_A | -1.95392 | 0.010393 | 3645203  |
| C2_00360C_A | -1.95466 | 0.001531 | 3638825  |
| RCL1        | -1.95725 | 0.002953 | 3645199  |
| PEP12       | -1.95749 | 0.005101 | 3637737  |

|             |          |          |          |
|-------------|----------|----------|----------|
| VPS27       | -1.96128 | 0.00125  | 3639326  |
| RIB1        | -1.96326 | 0.001698 | 3642607  |
| PRP22       | -1.96417 | 0.003783 | 3636404  |
| CR_06740W_A | -1.96513 | 0.067056 | 3646616  |
| C2_07800W_A | -1.96622 | 0.100748 | 3642325  |
| C2_09240C_A | -1.96638 | 0.041733 | 3644064  |
| C4_05400C_A | -1.96845 | 0.005739 | 3646952  |
| PMC1        | -1.96956 | 0.00104  | 3636627  |
| C1_05210C_A | -1.96998 | 0.024949 | 3642465  |
| LAC1        | -1.97082 | 0.134374 | 3641717  |
| MED22       | -1.97215 | 0.259037 | 3640217  |
| PCL1        | -1.97219 | 0.262582 | 3646356  |
| C6_01940W_A | -1.97247 | 0.262578 | 30515337 |
| CR_02440W_A | -1.97251 | 0.276163 | 3644923  |
| C5_04010C_A | -1.97263 | 0.27187  | 3647439  |
| C7_01150W_A | -1.97358 | 0.010981 | 3645913  |
| CR_05730C_A | -1.97664 | 0.002362 | 3646698  |
| C2_03420C_A | -1.98028 | 0.004639 | 3637411  |
| GRX3        | -1.98223 | 0.001001 | 3637858  |
| NAG3        | -1.98244 | 0.00388  | 3645969  |
| CR_04820W_A | -1.98556 | 0.002638 | 3647298  |
| FGR44       | -1.9884  | 0.005217 | 3635166  |
| EFG1        | -1.98889 | 0.002659 | 3644145  |
| FPG1        | -1.98994 | 0.000489 | 3641632  |
| C3_00630W_A | -1.9902  | 0.000192 | 3640576  |
| C4_07210W_A | -1.99364 | 0.004592 | 3642959  |
| C1_03750W_A | -1.99436 | 0.009681 | 3644690  |
| MED15       | -1.99468 | 0.000356 | 3640761  |
| MTR2        | -1.99563 | 0.002641 | 30515167 |
| IPT1        | -1.99707 | 0.002893 | 3634941  |
| C1_01140C_A | -1.99922 | 0.003561 | 3640202  |
| C1_10420C_A | -1.9995  | 0.005289 | 3647178  |
| C6_02460C_A | -2.00031 | 0.006146 | 3639168  |
| SOG2        | -2.00045 | 0.000115 | 3644475  |
| C2_02770W_A | -2.00129 | 4.27E-05 | 3643031  |
| C2_10850C_A | -2.00316 | 0.00192  | 3641232  |
| C1_12580W_A | -2.00317 | 0.002639 | 3647603  |
| C1_04960C_A | -2.00392 | 0.00432  | 3647527  |
| C4_00080C_A | -2.00549 | 0.002519 | 3648065  |
| ZCF20       | -2.00823 | 0.003878 | 3647059  |
| RER2        | -2.01527 | 0.002752 | 3636399  |
| SSN6        | -2.01753 | 0.001574 | 3638518  |
| YKE2        | -2.01779 | 0.006727 | 30515454 |
| CR_10750C_A | -2.01932 | 0.010652 | 3638942  |
| C5_02740W_A | -2.02154 | 0.031042 | 3637739  |
| C5_01050C_A | -2.02238 | 0.0175   | 3642648  |
| MUC1        | -2.0231  | 3.53E-05 | 3645771  |

|             |          |          |          |
|-------------|----------|----------|----------|
| TBP1        | -2.02966 | 0.001499 | 3647675  |
| NAB3        | -2.03045 | 8.62E-05 | 3639209  |
| SFL1        | -2.03147 | 9.45E-05 | 3642498  |
| RVS161      | -2.03165 | 0.000219 | 3638005  |
| PTR22       | -2.03372 | 0.00072  | 3645634  |
| C4_07100C_A | -2.03409 | 9.89E-05 | 3642903  |
| FGR3        | -2.0354  | 0.00126  | 3641179  |
| INN1        | -2.03749 | 5.38E-05 | 3642578  |
| C2_00840W_A | -2.03865 | 0.016253 | 3638807  |
| C1_01850C_A | -2.04117 | 0.003731 | 3645431  |
| C3_06760W_A | -2.04326 | 0.00373  | 3638502  |
| HBR1        | -2.04502 | 0.000694 | 3639295  |
| C3_07580W_A | -2.04547 | 0.002582 | 30515225 |
| C2_09510C_A | -2.04788 | 0.000404 | 3643816  |
| LEU5        | -2.04945 | 0.000825 | 3638838  |
| CWT1        | -2.0514  | 0.001025 | 3647595  |
| GAP5        | -2.0527  | 0.000129 | 3646954  |
| RPA190      | -2.05314 | 0.000325 | 3647677  |
| C3_00100W_A | -2.0556  | 0.002877 | 3640567  |
| CWC22       | -2.05732 | 0.033909 | 3643938  |
| SIZ1        | -2.06384 | 0.000129 | 3640219  |
| C2_04820W_A | -2.06543 | 0.002674 | 3647776  |
| CR_06290C_A | -2.06932 | 0.002854 | 3644856  |
| CR_08500W_A | -2.06983 | 0.00057  | 3642136  |
| C2_01310W_A | -2.07443 | 0.002404 | 3638788  |
| C5_00350C_A | -2.07621 | 0.0018   | 3641554  |
| C4_04510W_A | -2.07759 | 0.00053  | 3641120  |
| C3_03190C_A | -2.079   | 0.00314  | 3638427  |
| BRF1        | -2.08077 | 0.000591 | 3646689  |
| RCA1        | -2.08222 | 0.000221 | 3639303  |
| C2_02800W_A | -2.08306 | 0.017971 | 30515096 |
| C5_03560W_A | -2.08423 | 0.005751 | 3646975  |
| C2_10050W_A | -2.08565 | 0.001103 | 3643949  |
| C1_05360C_A | -2.08629 | 0.000795 | 3642482  |
| C2_00770W_A | -2.09107 | 0.005793 | 3638909  |
| C4_02570C_A | -2.0929  | 0.00868  | 3637916  |
| C5_03740W_A | -2.09673 | 0.002451 | 3647237  |
| PTH1        | -2.09832 | 0.001082 | 3637710  |
| C4_01860C_A | -2.10085 | 0.0057   | 3635590  |
| C3_04840C_A | -2.10749 | 0.019718 | 3635224  |
| FAB1        | -2.10981 | 4.93E-05 | 3635766  |
| C7_00160C_A | -2.11285 | 0.000531 | 3637972  |
| C4_05440C_A | -2.11288 | 0.003358 | 3646960  |
| C3_00130C_A | -2.11361 | 2.36E-05 | 3640593  |
| SLU7        | -2.11475 | 0.023537 | 3638501  |
| C4_02920W_A | -2.11634 | 0.000583 | 3637878  |
| C1_07640C_A | -2.11979 | 0.022097 | 3646659  |

|             |          |          |          |
|-------------|----------|----------|----------|
| C3_06600C_A | -2.12135 | 0.005967 | 3642280  |
| C4_01970W_A | -2.12482 | 0.000549 | 3635663  |
| KCH1        | -2.12802 | 0.041301 | 3636988  |
| C7_00040C_A | -2.13222 | 0.014632 | 3638002  |
| C1_06540C_A | -2.13372 | 0.001593 | 3639520  |
| RRP6        | -2.13459 | 0.000509 | 3647535  |
| C7_03400C_A | -2.13909 | 0.000369 | 3646717  |
| GAP2        | -2.13924 | 5.97E-05 | 3643662  |
| C1_04040C_A | -2.14115 | 0.001455 | 3646429  |
| C5_03030W_A | -2.14119 | 0.005524 | 3637822  |
| SET6        | -2.14198 | 0.022385 | 3644590  |
| MET4        | -2.14351 | 0.002168 | 3641219  |
| C2_02200W_A | -2.14374 | 0.002728 | 3635772  |
| CUP1        | -2.14379 | 0.000937 | 30515318 |
| ZSF1        | -2.14383 | 2.3E-05  | 3641257  |
| C1_10910C_A | -2.14468 | 0.000965 | 3644445  |
| UBI4        | -2.14505 | 5.53E-05 | 3638432  |
| C4_04670C_A | -2.15115 | 0.000405 | 3641140  |
| C5_00820W_A | -2.15205 | 0.001875 | 3644128  |
| CAN3        | -2.15462 | 0.000515 | 3647066  |
| CR_01410C_A | -2.15475 | 0.001336 | 3640136  |
| C6_04550C_A | -2.15502 | 0.000134 | 3645976  |
| XOG1        | -2.15909 | 0.010931 | 3636837  |
| C7_03890C_A | -2.16058 | 0.00016  | 3643108  |
| CR_02670C_A | -2.16561 | 0.000889 | 3642572  |
| PPG1        | -2.16917 | 0.01459  | 3641143  |
| SFP1        | -2.17505 | 0.000123 | 3635225  |
| C5_05140W_A | -2.17524 | 0.002159 | 3636460  |
| TPK1        | -2.1763  | 3.01E-05 | 3634879  |
| C6_04290W_A | -2.17648 | 0.000364 | 3646280  |
| GIR2        | -2.17664 | 0.000578 | 3636962  |
| CR_06450W_A | -2.1819  | 0.010748 | 3645279  |
| C3_06740W_A | -2.18506 | 0.001099 | 3638503  |
| PSP1        | -2.18557 | 5.37E-05 | 3644551  |
| C7_02550C_A | -2.19038 | 0.001119 | 3637018  |
| C1_14480W_A | -2.19437 | 0.003591 | 3643328  |
| MTG2        | -2.19616 | 0.002107 | 3646693  |
| C6_01890C_A | -2.19719 | 0.000152 | 3641598  |
| C2_05160C_A | -2.19811 | 2.75E-05 | 3643461  |
| RAD1        | -2.20173 | 0.000467 | 3641192  |
| C1_00540C_A | -2.20496 | 0.00024  | 3639367  |
| RTG1        | -2.20616 | 0.000565 | 3634929  |
| C1_11690W_A | -2.2095  | 0.000156 | 3645322  |
| C5_05460C_A | -2.20954 | 0.04982  | 3636527  |
| C5_00800C_A | -2.20992 | 2.79E-05 | 3644126  |
| C3_04260W_A | -2.21166 | 0.001274 | 3635140  |
| SUL2        | -2.21285 | 0.0195   | 3637835  |

|             |          |          |          |
|-------------|----------|----------|----------|
| TFB3        | -2.21494 | 0.003147 | 3644115  |
| CR_08410W_A | -2.2176  | 0.000706 | 3642116  |
| CR_00090C_A | -2.22052 | 0.001694 | 3639734  |
| CR_03710C_A | -2.22074 | 0.000163 | 3643224  |
| C4_05740C_A | -2.22247 | 1.06E-05 | 3641806  |
| C5_02580W_A | -2.22837 | 0.001236 | 3637721  |
| SGS1        | -2.2359  | 0.000167 | 3641258  |
| C5_02510C_A | -2.23835 | 0.001318 | 3637767  |
| UTP15       | -2.23908 | 0.000444 | 3643906  |
| C3_07900C_A | -2.24141 | 0.002131 | 3647450  |
| MET10       | -2.2417  | 6.63E-06 | 3644088  |
| CR_10640W_A | -2.24209 | 0.03511  | 3639014  |
| C7_03000C_A | -2.24639 | 0.00198  | 3641383  |
| C2_10740C_A | -2.24745 | 0.000229 | 3641236  |
| C4_06850C_A | -2.24824 | 0.000325 | 3642912  |
| STD1        | -2.25073 | 1.21E-06 | 3647459  |
| C2_03760C_A | -2.25144 | 0.000489 | 3637371  |
| AXL1        | -2.25206 | 0.009554 | 3641938  |
| C1_12610W_A | -2.25277 | 0.000818 | 3646825  |
| RIX7        | -2.25348 | 0.00018  | 3637735  |
| PRP45       | -2.25617 | 0.028862 | 3639166  |
| PMA1        | -2.25837 | 8.97E-05 | 3640531  |
| NUP49       | -2.25906 | 0.000357 | 3636173  |
| TSR1        | -2.26057 | 6.24E-05 | 3642135  |
| PDX3        | -2.26169 | 0.000166 | 3640949  |
| RIT1        | -2.26305 | 0.008451 | 3638492  |
| CR_03940W_A | -2.26405 | 0.001095 | 3648378  |
| BMT9        | -2.26966 | 0.000279 | 3635654  |
| URA7        | -2.27118 | 6.75E-06 | 3636510  |
| C3_07490W_A | -2.27467 | 2.84E-06 | 3638528  |
| C5_01430C_A | -2.27535 | 0.001147 | 3647056  |
| C6_03780C_A | -2.27632 | 0.000227 | 3640308  |
| C1_07150W_A | -2.27963 | 0.040382 | 30515019 |
| C1_12680W_A | -2.28105 | 2.07E-05 | 3646833  |
| C1_12860C_A | -2.2835  | 0.021875 | 3636179  |
| SPL1        | -2.28427 | 1.88E-05 | 3638035  |
| CR_07320C_A | -2.28433 | 0.000346 | 3646057  |
| DES1        | -2.2866  | 6.23E-06 | 3636529  |
| C6_03220W_A | -2.2866  | 0.013979 | 3639179  |
| C3_04330C_A | -2.29423 | 2.41E-05 | 3635272  |
| NSA1        | -2.29454 | 0.000129 | 3642313  |
| SBA1        | -2.29745 | 0.00012  | 3640305  |
| C3_00570C_A | -2.29814 | 8.3E-05  | 3640584  |
| HEM1        | -2.30361 | 0.00013  | 3640149  |
| C6_02980C_A | -2.30386 | 0.001109 | 3639192  |
| C5_04910W_A | -2.30399 | 0.02938  | 3636417  |
| C2_10600W_A | -2.30596 | 0.00089  | 3641245  |

|             |          |          |          |
|-------------|----------|----------|----------|
| C2_09680W_A | -2.30657 | 0.002166 | 3643791  |
| C2_04570W_A | -2.3087  | 0.000162 | 3645441  |
| YAH1        | -2.30918 | 0.001943 | 3638368  |
| HSP104      | -2.30995 | 0.000123 | 3642097  |
| C1_03830C_A | -2.31257 | 0.000163 | 3644678  |
| IMP4        | -2.31417 | 0.000137 | 3644138  |
| NAT4        | -2.31564 | 0.000861 | 3635704  |
| DRS1        | -2.31691 | 1.07E-05 | 3639045  |
| C3_02790W_A | -2.31693 | 0.006443 | 3638416  |
| C1_12950W_A | -2.32037 | 0.000194 | 3636157  |
| C1_00570C_A | -2.33254 | 0.000753 | 3639362  |
| C4_07010C_A | -2.33298 | 0.03096  | 3642966  |
| CR_02510W_A | -2.33819 | 0.00023  | 3647694  |
| C1_04590W_A | -2.33991 | 0.001314 | 30514987 |
| UGA1        | -2.34134 | 0.002467 | 3637329  |
| C6_00980C_A | -2.34204 | 0.001075 | 3644046  |
| SPT5        | -2.34429 | 1.99E-05 | 3635847  |
| CR_06680C_A | -2.3459  | 4.31E-05 | 3646623  |
| C7_01990C_A | -2.34928 | 0.000865 | 3636966  |
| C3_00500C_A | -2.35117 | 0.000884 | 3640515  |
| SUI1        | -2.35167 | 0.000172 | 3647730  |
| CR_03080C_A | -2.35556 | 0.018416 | 3645104  |
| NIP7        | -2.35563 | 0.00046  | 3645880  |
| TRY2        | -2.35651 | 0.000385 | 3647670  |
| CR_07030C_A | -2.35666 | 0.001709 | 3645730  |
| C1_11290W_A | -2.36163 | 0.004504 | 3644553  |
| C1_13560W_A | -2.36641 | 0.004124 | 3636174  |
| C1_11900C_A | -2.36903 | 0.000728 | 3642005  |
| C1_10230C_A | -2.37178 | 3.24E-06 | 3634880  |
| PRN1        | -2.3729  | 0.002819 | 3639882  |
| CR_07670W_A | -2.3734  | 0.000223 | 3647255  |
| C3_07670W_A | -2.37386 | 5.38E-06 | 3638460  |
| PEX5        | -2.37391 | 3.73E-06 | 3645026  |
| C1_00980W_A | -2.37453 | 0.012932 | 30514959 |
| CR_10400W_A | -2.38056 | 0.000162 | 3638956  |
| C2_10540W_A | -2.38179 | 6.52E-05 | 3641200  |
| ALR1        | -2.38346 | 3.52E-06 | 3636616  |
| HST7        | -2.38607 | 4.61E-05 | 3640953  |
| C2_02390W_A | -2.38676 | 0.006831 | 3635829  |
| C6_00700C_A | -2.38732 | 0.000204 | 3647074  |
| C1_12570C_A | -2.39201 | 6.74E-06 | 3647604  |
| TIM17       | -2.39446 | 0.000879 | 3647790  |
| CTM1        | -2.39566 | 0.000276 | 3638951  |
| ATG15       | -2.39974 | 1.9E-05  | 3641641  |
| HNT1        | -2.40563 | 1.82E-06 | 3644441  |
| C3_02030W_A | -2.40664 | 0.00044  | 3636580  |
| PNC1        | -2.40706 | 0.000413 | 3646232  |



|             |          |          |          |
|-------------|----------|----------|----------|
| C1_09850C_A | -2.40906 | 7.33E-07 | 3634849  |
| DIM1        | -2.40924 | 0.005192 | 3636135  |
| C1_06840C_A | -2.41063 | 2.36E-05 | 30515012 |
| EXM2        | -2.41256 | 0.000972 | 3642929  |
| C1_07960W_A | -2.41294 | 0.009056 | 3640725  |
| C6_02150C_A | -2.41366 | 0.007636 | 3645888  |
| C1_11770C_A | -2.41565 | 1.98E-06 | 3645327  |
| C3_07800C_A | -2.41641 | 0.000409 | 3647461  |
| IFF3        | -2.41687 | 5.42E-05 | 3643189  |
| C6_02690C_A | -2.41746 | 0.00025  | 3639228  |
| C2_04120C_A | -2.4189  | 2.96E-05 | 3637377  |
| PDR6        | -2.42143 | 3.94E-05 | 3638824  |
| CR_10040W_A | -2.42868 | 0.002144 | 3639034  |
| UTP5        | -2.4312  | 3.09E-05 | 3638922  |
| C4_06420W_A | -2.43519 | 0.000101 | 3642795  |
| IFF9        | -2.43712 | 0.000132 | 3641008  |
| C2_09810C_A | -2.44234 | 0.044737 | 3643802  |
| HAP43       | -2.44299 | 5.26E-07 | 3644531  |
| C3_00940W_A | -2.44725 | 8.84E-07 | 3639851  |
| C3_03740W_A | -2.44837 | 0.035406 | 3645640  |
| BMS1        | -2.4489  | 1.29E-06 | 3639857  |
| C2_06120C_A | -2.45133 | 0.039468 | 3644084  |
| SLR1        | -2.4515  | 5.72E-06 | 3643957  |
| C4_04010W_A | -2.45517 | 0.002818 | 3641218  |
| ISY1        | -2.4561  | 0.000448 | 3646233  |
| C7_02930C_A | -2.45967 | 2.28E-05 | 3641390  |
| OPT3        | -2.46089 | 2.66E-05 | 3644918  |
| C7_01400C_A | -2.46434 | 0.000427 | 3645893  |
| ARO80       | -2.46473 | 0.000313 | 3636808  |
| C5_04290C_A | -2.46654 | 2.58E-05 | 3636455  |
| C7_00260C_A | -2.47821 | 2.64E-06 | 3637978  |
| C4_01930C_A | -2.48978 | 0.005656 | 3635634  |
| FGR13       | -2.48991 | 0.002145 | 3648078  |
| TUS1        | -2.49059 | 7.69E-06 | 3646144  |
| C4_03580W_A | -2.49191 | 0.015339 | 3645369  |
| DAL5        | -2.49203 | 0.00576  | 3638401  |
| C3_00300W_A | -2.49438 | 1.25E-05 | 3640524  |
| UTP4        | -2.49476 | 5.29E-05 | 3636657  |
| KNS1        | -2.49796 | 0.000904 | 3636228  |
| C1_06320W_A | -2.49823 | 0.047225 | 3648118  |
| CKA1        | -2.50473 | 1.43E-05 | 3639018  |
| CR_10000C_A | -2.50565 | 0.016753 | 3639030  |
| DBP8        | -2.50656 | 0.000154 | 3646692  |
| MRPL37      | -2.50721 | 0.019903 | 3644782  |
| C2_06480W_A | -2.51115 | 0.000221 | 3646568  |
| SOD3        | -2.51388 | 1.57E-07 | 30515347 |
| EST1        | -2.51537 | 2.41E-06 | 3636526  |

|             |          |          |          |
|-------------|----------|----------|----------|
| C2_04100W_A | -2.51985 | 0.003706 | 3637379  |
| PET127      | -2.5218  | 0.000116 | 3644417  |
| C4_05900C_A | -2.52828 | 1.21E-06 | 3641796  |
| C3_02710W_A | -2.52883 | 7.73E-05 | 30515190 |
| C5_00780C_A | -2.52889 | 0.000402 | 3644124  |
| DAL1        | -2.53076 | 0.000252 | 3640564  |
| C2_09980W_A | -2.53294 | 0.000159 | 3643965  |
| C2_03150C_A | -2.53369 | 0.004624 | 3642990  |
| C4_02510W_A | -2.53533 | 0.000124 | 3637865  |
| PGA55       | -2.5354  | 2.68E-05 | 3645784  |
| SAM35       | -2.53978 | 0.000133 | 3643329  |
| C2_04280W_A | -2.54069 | 4.19E-05 | 3637326  |
| MRPL27      | -2.54296 | 0.000359 | 3636884  |
| MHP1        | -2.54376 | 2.99E-05 | 3642460  |
| CR_10430C_A | -2.54415 | 0.046243 | 3638975  |
| OPT7        | -2.54479 | 0.008941 | 3645008  |
| SVF1        | -2.54491 | 1.7E-05  | 3639289  |
| C1_02960C_A | -2.54937 | 3.58E-06 | 3636834  |
| C2_01680C_A | -2.55032 | 6.32E-05 | 3635744  |
| DUR32       | -2.55032 | 0.009594 | 3636142  |
| C1_01580W_A | -2.55268 | 8.54E-05 | 3640222  |
| CR_02100C_A | -2.55439 | 0.000166 | 3640141  |
| C3_02910W_A | -2.55582 | 0.010224 | 3638378  |
| PRP39       | -2.55648 | 0.011149 | 3635832  |
| C2_07760W_A | -2.56055 | 7.53E-05 | 3642298  |
| C7_00200W_A | -2.56112 | 6.86E-05 | 3637968  |
| C1_04120C_A | -2.56377 | 0.009981 | 3644701  |
| TRM12       | -2.56736 | 0.001499 | 3641738  |
| MNN4        | -2.57336 | 1.49E-06 | 3642784  |
| FGR15       | -2.57341 | 0.000191 | 3638882  |
| C6_03290W_A | -2.58203 | 1.27E-05 | 3639195  |
| C2_05770W_A | -2.58323 | 3.69E-05 | 3645579  |
| CTR1        | -2.58559 | 1.08E-05 | 3647077  |
| PTP1        | -2.58645 | 3.5E-05  | 3642093  |
| GEF2        | -2.58784 | 2.1E-06  | 3644935  |
| MSW1        | -2.5882  | 0.005922 | 3637743  |
| C3_05160C_A | -2.5892  | 6.85E-08 | 3635229  |
| MEF2        | -2.58949 | 5.71E-05 | 3639564  |
| C3_00840C_A | -2.60131 | 0.025941 | 3647758  |
| CIP1        | -2.60145 | 0.007726 | 3644018  |
| SEC2        | -2.60191 | 2.29E-05 | 3636119  |
| C2_07060W_A | -2.60681 | 5.46E-05 | 3643500  |
| IFE2        | -2.60764 | 1.14E-06 | 3648027  |
| C4_07220C_A | -2.60948 | 2.49E-05 | 3642955  |
| ARG4        | -2.61606 | 0.000134 | 3646237  |
| C1_00520W_A | -2.6188  | 0.000381 | 3639310  |
| PAM16       | -2.6188  | 5E-05    | 3643321  |

|             |          |          |          |
|-------------|----------|----------|----------|
| C4_00610W_A | -2.61895 | 3.3E-05  | 3645770  |
| POP4        | -2.62415 | 0.000604 | 3639241  |
| CAP1        | -2.62813 | 1.52E-05 | 3636640  |
| C1_11160C_A | -2.62922 | 0.001618 | 3644399  |
| RTG3        | -2.63524 | 1.83E-05 | 3644423  |
| PNG2        | -2.63666 | 0.000129 | 3645568  |
| KRR1        | -2.63694 | 4.22E-05 | 3644542  |
| GRR1        | -2.63829 | 2.52E-07 | 3636392  |
| KIN3        | -2.6406  | 2.45E-05 | 3641199  |
| RXT3        | -2.64164 | 0.000744 | 3643431  |
| JIP5        | -2.64287 | 6.14E-06 | 3634922  |
| NOC4        | -2.6442  | 9.98E-07 | 3645224  |
| C1_06380C_A | -2.64676 | 0.016911 | 3639559  |
| MNL1        | -2.65074 | 3E-07    | 3646050  |
| CR_00660W_A | -2.65203 | 0.033959 | 3639658  |
| C2_03550C_A | -2.65208 | 1.09E-07 | 3637338  |
| C7_01370W_A | -2.65231 | 0.023019 | 3645901  |
| CTF1        | -2.65302 | 9.02E-05 | 3635788  |
| CAN2        | -2.65668 | 4.86E-07 | 3644017  |
| OYE2        | -2.65707 | 2.37E-05 | 3641603  |
| C6_02420W_A | -2.65734 | 9.48E-05 | 3645885  |
| TOP1        | -2.65809 | 5.1E-08  | 3644034  |
| CR_02890C_A | -2.65847 | 6.59E-05 | 3642585  |
| PPT1        | -2.66345 | 0.000248 | 3636602  |
| STP2        | -2.66461 | 5.56E-06 | 3636214  |
| CR_10800C_A | -2.66502 | 1.29E-07 | 3638948  |
| PWP2        | -2.66788 | 1.59E-07 | 3640416  |
| CR_03200C_A | -2.66901 | 1.8E-06  | 3645131  |
| C6_03370W_A | -2.6706  | 2.31E-06 | 3639230  |
| LEU3        | -2.67129 | 7.17E-07 | 3637757  |
| C4_06990W_A | -2.67279 | 2.24E-05 | 3642968  |
| C6_02380W_A | -2.67784 | 5.83E-08 | 3645883  |
| QDR1        | -2.68055 | 1.4E-06  | 3640941  |
| CR_00430C_A | -2.68378 | 0.008927 | 30515366 |
| C2_09360W_A | -2.68538 | 0.002246 | 3644109  |
| C3_01150C_A | -2.69066 | 0.000546 | 3648401  |
| RRP8        | -2.69068 | 1.91E-05 | 3643900  |
| DFG16       | -2.69653 | 5.33E-06 | 3637413  |
| DAL9        | -2.69759 | 0.001546 | 3645653  |
| ARG81       | -2.70034 | 1.19E-07 | 3634775  |
| C5_04990W_A | -2.70078 | 0.011952 | 3636538  |
| C1_10890C_A | -2.70477 | 1.02E-05 | 3644447  |
| PRS5        | -2.70819 | 1.6E-06  | 3642296  |
| YHB4        | -2.70865 | 4.47E-05 | 3638999  |
| C4_03740W_A | -2.7098  | 8.25E-05 | 3645357  |
| GUT1        | -2.71096 | 9.94E-05 | 3648082  |
| C5_00130C_A | -2.7175  | 5.9E-05  | 3647881  |

|             |          |          |          |
|-------------|----------|----------|----------|
| C4_02850W_A | -2.71992 | 3.07E-07 | 3637910  |
| FCY24       | -2.72053 | 0.015172 | 3641902  |
| MIS12       | -2.72132 | 8.04E-07 | 3639669  |
| FMT1        | -2.72509 | 3E-05    | 3646530  |
| C2_01370C_A | -2.72512 | 3.98E-07 | 3635723  |
| C2_02710C_A | -2.72693 | 2.58E-05 | 3643003  |
| C1_08840W_A | -2.72956 | 0.033704 | 3634919  |
| C7_02120C_A | -2.73337 | 0.001452 | 3637019  |
| HEX3        | -2.73437 | 1.97E-05 | 3635776  |
| MIG1        | -2.73513 | 2.43E-07 | 3637812  |
| C2_00200W_A | -2.74192 | 5.67E-07 | 3638903  |
| CR_10410C_A | -2.7422  | 1.84E-06 | 3638957  |
| C3_00160C_A | -2.74454 | 7.3E-07  | 3640591  |
| VAC7        | -2.74704 | 9.57E-05 | 3646849  |
| CR_05550C_A | -2.7564  | 2.98E-07 | 3647593  |
| C5_05340W_A | -2.7591  | 1.94E-06 | 3636400  |
| UTP8        | -2.7608  | 2.24E-09 | 3640547  |
| C2_09790W_A | -2.76177 | 5.34E-05 | 3643804  |
| DYN1        | -2.76386 | 1.5E-06  | 3635236  |
| MET16       | -2.76528 | 6.48E-05 | 3642964  |
| ERO1        | -2.77107 | 6.09E-08 | 3634810  |
| C1_14190C_A | -2.77177 | 2.74E-06 | 3643300  |
| C2_02570W_A | -2.77196 | 0.005933 | 3635858  |
| C4_03190W_A | -2.77201 | 9.41E-06 | 3637838  |
| C1_02850W_A | -2.77418 | 7.13E-09 | 3636862  |
| SPB1        | -2.77509 | 2.69E-07 | 3648179  |
| C2_08850C_A | -2.77919 | 1.3E-06  | 3643890  |
| SSU72       | -2.78101 | 1.35E-05 | 3645129  |
| MSN4        | -2.78135 | 7.52E-07 | 3634911  |
| C7_03760W_A | -2.78819 | 0.001142 | 3647865  |
| C3_06820C_A | -2.79074 | 1.6E-08  | 3638544  |
| C5_03960W_A | -2.79921 | 2.89E-10 | 3647444  |
| C2_05670C_A | -2.79943 | 0.004377 | 3645570  |
| C4_02090C_A | -2.80818 | 6.42E-06 | 3635642  |
| CR_07830C_A | -2.81051 | 9.22E-09 | 3647345  |
| C1_09390W_A | -2.81055 | 0.000421 | 3634851  |
| C5_02810W_A | -2.8154  | 0.008876 | 30515304 |
| ADA2        | -2.81941 | 9.82E-06 | 3644450  |
| CNH1        | -2.82118 | 3.27E-08 | 3648056  |
| C6_02330W_A | -2.83554 | 4.57E-07 | 3645877  |
| C4_03830W_A | -2.83738 | 1.33E-05 | 3647851  |
| LIG1        | -2.8382  | 8.65E-07 | 3636947  |
| C4_05330C_A | -2.84138 | 3.47E-05 | 3646959  |
| GCV2        | -2.84281 | 1.22E-07 | 3646505  |
| SWE1        | -2.84579 | 3.5E-06  | 3634866  |
| C1_11580W_A | -2.85052 | 1.91E-07 | 3645330  |
| FET3        | -2.85099 | 0.000325 | 3647153  |

|             |          |          |          |
|-------------|----------|----------|----------|
| C2_02960C_A | -2.85279 | 5.98E-06 | 3643011  |
| DUS4        | -2.86132 | 4.43E-06 | 3641580  |
| CEF1        | -2.86182 | 1.93E-06 | 3634808  |
| C2_09420W_A | -2.8628  | 0.000826 | 3647718  |
| NAG1        | -2.86289 | 6.75E-06 | 3645966  |
| SET2        | -2.86438 | 1.14E-06 | 3643923  |
| CR_06840W_A | -2.86592 | 6.97E-08 | 3647322  |
| SDA1        | -2.86931 | 3.05E-08 | 3646688  |
| CPA2        | -2.87005 | 5.38E-05 | 3640385  |
| CR_03870W_A | -2.8701  | 0.000506 | 3643187  |
| CLN3        | -2.87308 | 0.000157 | 3642624  |
| C1_14580C_A | -2.87386 | 7.12E-08 | 3643290  |
| C7_01660C_A | -2.87745 | 1.04E-05 | 3636983  |
| C4_02690W_A | -2.88076 | 1.57E-09 | 3637861  |
| C2_02820C_A | -2.89557 | 1.89E-05 | 3643027  |
| CPH2        | -2.8972  | 1.3E-07  | 3646067  |
| REP1        | -2.89747 | 0.005094 | 3639708  |
| SPR28       | -2.90176 | 0.02033  | 3637716  |
| CR_06060W_A | -2.90608 | 0.000118 | 6335358  |
| C2_05060C_A | -2.90695 | 0.001367 | 3643451  |
| C3_02890C_A | -2.91247 | 0.011634 | 3638336  |
| HAL9        | -2.91276 | 1.05E-05 | 3643757  |
| C3_02020W_A | -2.91342 | 1.29E-10 | 3636592  |
| C3_01540W_A | -2.91939 | 0.016384 | 3636567  |
| CR_09740W_A | -2.9203  | 1.8E-07  | 3639008  |
| C2_10790C_A | -2.92913 | 4.24E-05 | 3641242  |
| CR_01440C_A | -2.93015 | 1.73E-05 | 30515374 |
| TCO89       | -2.93176 | 8.31E-09 | 3644788  |
| C4_00060W_A | -2.93267 | 5.1E-06  | 3648061  |
| RIO2        | -2.93771 | 4.21E-07 | 3642066  |
| CR_07910C_A | -2.94186 | 1.71E-08 | 3644142  |
| C1_11880W_A | -2.94266 | 0.00014  | 3642007  |
| C1_03140W_A | -2.94688 | 4.7E-07  | 3636929  |
| PRB1        | -2.94818 | 9.13E-08 | 3643521  |
| URK1        | -2.94852 | 4.31E-07 | 3635186  |
| C7_00870W_A | -2.95496 | 0.020924 | 3638054  |
| RPA34       | -2.95696 | 1.01E-05 | 3634883  |
| GNP3        | -2.95737 | 7.85E-05 | 3639027  |
| CNT         | -2.95831 | 3.91E-08 | 3644071  |
| CR_09460C_A | -2.96095 | 3.1E-08  | 30515453 |
| HST2        | -2.96192 | 0.000425 | 3640162  |
| C1_12150C_A | -2.96392 | 0.004875 | 3642049  |
| C2_08860W_A | -2.96554 | 9.48E-06 | 3645776  |
| C1_09540W_A | -2.96772 | 2.17E-05 | 3634885  |
| CR_07690W_A | -2.96773 | 0.009325 | 3648194  |
| DBP3        | -2.96951 | 1.08E-06 | 3634868  |
| C4_07150W_A | -2.96993 | 0.022133 | 3642935  |

|             |          |          |          |
|-------------|----------|----------|----------|
| C2_00790C_A | -2.97306 | 9.51E-06 | 3638907  |
| C4_03950C_A | -2.9748  | 0.030664 | 30515263 |
| HGT18       | -2.9749  | 0.00122  | 3645111  |
| C3_02920W_A | -2.97619 | 3.5E-07  | 3638379  |
| ARO10       | -2.97662 | 0.001729 | 3647320  |
| C2_00650W_A | -2.97773 | 1.57E-08 | 3638889  |
| CR_07920W_A | -2.9801  | 3.75E-06 | 3644141  |
| C2_04770W_A | -2.9846  | 0.000537 | 3647783  |
| C6_01350W_A | -2.98497 | 1.1E-05  | 3641642  |
| OYE32       | -2.98689 | 4.03E-08 | 3642919  |
| C3_03300C_A | -2.98727 | 4.84E-08 | 3638361  |
| C1_13430C_A | -2.9933  | 0.000778 | 3636223  |
| CR_02970C_A | -2.99389 | 4.01E-10 | 3642603  |
| CR_06320C_A | -2.99612 | 0.000189 | 3644845  |
| ECM21       | -2.99905 | 2.8E-07  | 3634784  |
| C7_01040C_A | -3.0027  | 4.7E-06  | 3638018  |
| C2_01660C_A | -3.00283 | 1.58E-05 | 3635742  |
| CIC1        | -3.00431 | 6.3E-06  | 3644059  |
| SFT1        | -3.01226 | 0.000747 | 30515372 |
| C6_03460W_A | -3.01566 | 2.1E-11  | 3640252  |
| C6_01550C_A | -3.02056 | 2.03E-05 | 3641653  |
| RAX2        | -3.02434 | 9.69E-07 | 3647610  |
| C3_03000W_A | -3.03077 | 0.030565 | 3638389  |
| EAf3        | -3.03572 | 0.000599 | 3648318  |
| CR_01370C_A | -3.03901 | 1.41E-05 | 3640168  |
| MNN4-4      | -3.04386 | 0.001269 | 3639250  |
| IFF8        | -3.04569 | 0.016921 | 3644117  |
| BUD21       | -3.05142 | 1.95E-06 | 3640541  |
| NOG1        | -3.05145 | 6.52E-09 | 3641736  |
| RRS1        | -3.05834 | 4.11E-06 | 3639352  |
| C7_03210W_A | -3.0621  | 0.001261 | 3641371  |
| PLB3        | -3.06308 | 7.36E-08 | 3647089  |
| CDR4        | -3.06557 | 3.61E-06 | 3640711  |
| C3_05860C_A | -3.06559 | 3.82E-06 | 3641759  |
| C5_00160W_A | -3.06994 | 0.000602 | 3647871  |
| FAD3        | -3.07066 | 0.001797 | 3636124  |
| CR_00750C_A | -3.07438 | 1.26E-06 | 3640438  |
| LIP7        | -3.07477 | 0.040476 | 3641917  |
| C2_00540W_A | -3.07681 | 1.57E-09 | 3638865  |
| SAP2        | -3.07976 | 2.01E-05 | 3647354  |
| C6_02350C_A | -3.08069 | 6.66E-06 | 3645881  |
| OPT8        | -3.08128 | 1.07E-06 | 3640266  |
| C1_08700W_A | -3.0832  | 1.97E-08 | 3634936  |
| C7_01070C_A | -3.08924 | 1.27E-07 | 3637949  |
| CR_06230W_A | -3.0962  | 7.36E-05 | 3644867  |
| MAK21       | -3.09858 | 1.39E-08 | 3635147  |
| C1_01630W_A | -3.10033 | 4.9E-09  | 3640194  |

|             |          |          |          |
|-------------|----------|----------|----------|
| C4_01500W_A | -3.10062 | 1.3E-06  | 3635617  |
| TOR1        | -3.10268 | 1.04E-08 | 3643480  |
| SHY1        | -3.10505 | 4E-08    | 3634824  |
| CR_05770W_A | -3.10693 | 0.000346 | 3646694  |
| GYP5        | -3.11185 | 4.3E-09  | 3641246  |
| FRP1        | -3.11293 | 2.68E-09 | 3645005  |
| C3_05850W_A | -3.11364 | 2.3E-06  | 3641758  |
| C2_09160W_A | -3.11714 | 0.000105 | 3644090  |
| CR_03160W_A | -3.11838 | 0.000104 | 3645117  |
| NMD3        | -3.12025 | 2.38E-10 | 3646614  |
| C3_04720C_A | -3.12267 | 1.59E-07 | 3635249  |
| TOK1        | -3.1254  | 2.4E-08  | 3645754  |
| C2_07580W_A | -3.1298  | 0.003021 | 3645216  |
| SDS24       | -3.13972 | 3.81E-09 | 3640756  |
| SLM2        | -3.14081 | 1.16E-08 | 3647559  |
| C3_01560W_A | -3.14135 | 1.04E-07 | 3636669  |
| C6_02790C_A | -3.14173 | 3.41E-08 | 3639245  |
| PTP2        | -3.14326 | 2.46E-09 | 3647858  |
| PTR3        | -3.14604 | 6.65E-05 | 3645428  |
| C2_06620W_A | -3.14618 | 0.008632 | 3646564  |
| C2_06440C_A | -3.14747 | 0.003422 | 3646565  |
| SLN1        | -3.1515  | 4.03E-10 | 3640422  |
| MEP2        | -3.15269 | 1.48E-07 | 3645022  |
| HAP41       | -3.15364 | 1.47E-09 | 3647405  |
| C5_03630C_A | -3.15787 | 0.002093 | 3646983  |
| C1_09840C_A | -3.1596  | 1.79E-08 | 3634848  |
| CTN1        | -3.16012 | 0.000448 | 3645414  |
| C4_05980C_A | -3.16216 | 0.000313 | 3646516  |
| C1_07950C_A | -3.16239 | 0.000117 | 3640724  |
| C2_04080W_A | -3.16872 | 3.37E-10 | 3637381  |
| CR_10810C_A | -3.17194 | 4.93E-07 | 3638949  |
| CIRT4B      | -3.17429 | 2.21E-08 | 3642560  |
| C5_01610W_A | -3.1765  | 0.000432 | 3647251  |
| ROT1        | -3.17902 | 0.000386 | 3639350  |
| C5_00310C_A | -3.18757 | 1.24E-06 | 3641576  |
| C2_00640W_A | -3.18791 | 3.85E-05 | 3638847  |
| MAK5        | -3.18984 | 6E-08    | 3643454  |
| C4_04810C_A | -3.19326 | 1.3E-07  | 3641112  |
| C1_05270C_A | -3.19499 | 8.93E-06 | 3642476  |
| C5_04170W_A | -3.19832 | 4.23E-11 | 3636543  |
| GYP7        | -3.1985  | 1.27E-09 | 3646245  |
| C5_02280C_A | -3.2129  | 1.69E-08 | 3637712  |
| C6_01340C_A | -3.21601 | 0.000256 | 30515331 |
| ARD         | -3.21664 | 1.26E-06 | 3647906  |
| C3_03670W_A | -3.21751 | 5E-07    | 3645649  |
| C4_04460C_A | -3.21765 | 4.15E-09 | 3641127  |
| FAL1        | -3.21782 | 1.64E-07 | 3639839  |

|             |          |          |          |
|-------------|----------|----------|----------|
| BUL4        | -3.21968 | 8.17E-06 | 3642037  |
| CR_02930W_A | -3.22678 | 5.41E-08 | 3642588  |
| CR_07750C_A | -3.22714 | 9.27E-08 | 3647350  |
| HSX11       | -3.23002 | 0.004797 | 3635660  |
| C1_05160C_A | -3.2317  | 3.78E-09 | 3642468  |
| NAG6        | -3.23389 | 6.87E-09 | 3645961  |
| C3_01130C_A | -3.23632 | 3.23E-06 | 3639901  |
| C6_02020C_A | -3.23808 | 1.14E-09 | 3647563  |
| C2_02120W_A | -3.24287 | 2.74E-07 | 3635746  |
| CR_08420W_A | -3.244   | 2.08E-10 | 3642117  |
| TBF1        | -3.24828 | 3.53E-08 | 3637327  |
| CR_05540C_A | -3.25108 | 3.58E-07 | 3647594  |
| UGT51C1     | -3.25228 | 2.2E-08  | 3640147  |
| CKA2        | -3.25519 | 2.61E-06 | 3643444  |
| MRPL36      | -3.25665 | 5.94E-06 | 3643733  |
| SUV3        | -3.26166 | 7.15E-07 | 3645451  |
| YTH1        | -3.26949 | 3.67E-09 | 3645572  |
| C2_08330W_A | -3.27144 | 5.24E-07 | 3648166  |
| REG1        | -3.27439 | 9.71E-09 | 3638858  |
| SPT14       | -3.27475 | 6.81E-08 | 3641019  |
| SPB4        | -3.27632 | 1.6E-06  | 3647252  |
| C1_09740C_A | -3.28008 | 0.025123 | 30515035 |
| C1_06820W_A | -3.28561 | 1.27E-08 | 3639493  |
| CR_10280W_A | -3.28639 | 5.38E-05 | 3638934  |
| C2_00090W_A | -3.28676 | 0.000343 | 3647910  |
| C4_05970W_A | -3.28955 | 1.12E-07 | 3646514  |
| C1_12370W_A | -3.29291 | 1.91E-05 | 3642061  |
| C7_02160W_A | -3.29303 | 3.55E-07 | 3636994  |
| WSC2        | -3.29559 | 1.52E-06 | 3639225  |
| C1_01160C_A | -3.29638 | 3.22E-07 | 3640204  |
| C1_09520C_A | -3.29931 | 1.13E-09 | 3634766  |
| CPP1        | -3.30075 | 9.39E-08 | 3634865  |
| CRP1        | -3.30111 | 8.09E-10 | 3634826  |
| C1_04840C_A | -3.30195 | 0.006687 | 3644785  |
| C3_00340W_A | -3.30217 | 0.003005 | 3640544  |
| OPT1        | -3.30556 | 0.000889 | 3640150  |
| STB3        | -3.31726 | 1.12E-06 | 3645781  |
| C1_01890C_A | -3.32249 | 1.69E-11 | 3645427  |
| C4_05230C_A | -3.32802 | 4.24E-08 | 3646156  |
| NOT5        | -3.32965 | 3.45E-11 | 3640763  |
| RGA2        | -3.33916 | 7.83E-09 | 3635661  |
| C1_10970W_A | -3.34234 | 8.92E-10 | 3644427  |
| MRPL40      | -3.34954 | 2.37E-08 | 3640968  |
| HSK3        | -3.35533 | 4.37E-06 | 3635730  |
| CR_03910C_A | -3.35876 | 8.51E-11 | 3640954  |
| C1_14350W_A | -3.37485 | 3.34E-13 | 3643281  |
| SFT2        | -3.37758 | 6E-06    | 3644442  |



|             |          |          |          |
|-------------|----------|----------|----------|
| ATX1        | -3.37791 | 0.002532 | 30515426 |
| C4_06080W_A | -3.38064 | 0.012286 | 30515280 |
| C7_00590W_A | -3.38084 | 3.25E-07 | 3637994  |
| C1_11570W_A | -3.38152 | 0.012072 | 30515055 |
| ZCF9        | -3.38156 | 2.36E-07 | 3638869  |
| SYG1        | -3.38398 | 3.01E-05 | 3644777  |
| C2_05270W_A | -3.38493 | 2.46E-09 | 3643470  |
| SPO7        | -3.38546 | 5.1E-06  | 3645576  |
| HPT1        | -3.38619 | 9.85E-08 | 3643034  |
| C1_06440C_A | -3.39022 | 9.83E-07 | 3639552  |
| C1_04510W_A | -3.3903  | 0.001355 | 3646147  |
| CCS1        | -3.39209 | 7.19E-12 | 3644476  |
| C3_02900W_A | -3.39556 | 4.95E-05 | 3638337  |
| DOT6        | -3.39835 | 2.98E-08 | 3640078  |
| PDE2        | -3.40052 | 6.22E-10 | 3636877  |
| C2_00280C_A | -3.40184 | 1.34E-05 | 3638802  |
| C4_05590W_A | -3.40364 | 1.57E-11 | 3641776  |
| SSY5        | -3.40674 | 6.4E-12  | 3642140  |
| PHO86       | -3.40888 | 4.7E-05  | 3642323  |
| C2_06090W_A | -3.41873 | 2.55E-07 | 3644097  |
| C2_07020C_A | -3.42308 | 0.00039  | 3643497  |
| CR_10420W_A | -3.42496 | 1.36E-08 | 3638974  |
| NBP2        | -3.42716 | 3.94E-08 | 3636963  |
| BAS1        | -3.43114 | 3.96E-11 | 3641136  |
| SPO11       | -3.43775 | 0.004575 | 3643873  |
| C4_00100C_A | -3.43789 | 3.12E-11 | 3645004  |
| SAP10       | -3.44638 | 2.38E-07 | 3641126  |
| HGT4        | -3.45073 | 4.96E-10 | 3635269  |
| BUB3        | -3.45249 | 6.18E-08 | 3646362  |
| C1_07560W_A | -3.45606 | 2.29E-05 | 3646676  |
| C7_01610W_A | -3.45632 | 1E-05    | 30515353 |
| C1_10360C_A | -3.45937 | 1.08E-08 | 3634836  |
| C3_06370C_A | -3.46306 | 1.97E-09 | 3642258  |
| TEC1        | -3.46633 | 3.3E-10  | 3635261  |
| PHO4        | -3.46685 | 2.5E-08  | 3641817  |
| MLH3        | -3.46856 | 4.03E-08 | 3643294  |
| C6_02970C_A | -3.47393 | 3.92E-07 | 3639190  |
| MRF1        | -3.47476 | 3.44E-10 | 3645321  |
| C5_02070C_A | -3.47582 | 3.76E-13 | 3643746  |
| C4_06790W_A | -3.48396 | 1.67E-08 | 3642918  |
| MPP10       | -3.48442 | 1.06E-09 | 3647912  |
| SMC6        | -3.48735 | 2.04E-08 | 3637039  |
| C1_11620W_A | -3.49076 | 0.002096 | 3645344  |
| C5_02440C_A | -3.49622 | 0.000201 | 3637728  |
| C7_01210C_A | -3.50182 | 4.76E-08 | 3645904  |
| C3_02670W_A | -3.50526 | 0.000652 | 3638405  |
| C1_10880W_A | -3.50543 | 1.03E-11 | 3644449  |

|             |          |          |          |
|-------------|----------|----------|----------|
| CR_06330C_A | -3.50651 | 0.000148 | 3644846  |
| UTP18       | -3.50954 | 1.81E-08 | 3643123  |
| YME1        | -3.51158 | 1.44E-10 | 3641816  |
| C2_02630W_A | -3.51479 | 5.89E-05 | 3635839  |
| C2_01050W_A | -3.51502 | 0.044919 | 30515086 |
| ZCF27       | -3.5269  | 4.61E-10 | 3635631  |
| PSO2        | -3.52804 | 0.001299 | 3641241  |
| PEA2        | -3.53441 | 5.7E-05  | 3647673  |
| MSN5        | -3.55085 | 3.75E-09 | 3637889  |
| NOP14       | -3.55105 | 1.62E-10 | 3635266  |
| RIM21       | -3.55379 | 3.03E-09 | 3643739  |
| C1_10120C_A | -3.56018 | 1.61E-11 | 3634779  |
| C5_03410C_A | -3.56743 | 1.25E-05 | 3646347  |
| C3_04620C_A | -3.59361 | 6.87E-05 | 3635155  |
| C2_03690C_A | -3.59438 | 9.41E-07 | 3637376  |
| ALS9        | -3.59972 | 1.28E-09 | 3640281  |
| PGA41       | -3.60007 | 0.003277 | 3642800  |
| CDC34       | -3.60394 | 6.19E-11 | 3637028  |
| VPS21       | -3.60601 | 5.94E-10 | 3642092  |
| PTK2        | -3.60886 | 1.39E-12 | 3641611  |
| DBP7        | -3.6089  | 6.98E-10 | 3645903  |
| CUP2        | -3.60999 | 7.55E-10 | 3636189  |
| PUT2        | -3.61026 | 1.2E-09  | 3636439  |
| ELP3        | -3.61221 | 3.37E-10 | 3641747  |
| C1_10710C_A | -3.6148  | 0.001572 | 3644407  |
| C3_04540C_A | -3.61542 | 1.83E-08 | 3635262  |
| RMP1        | -3.61553 | 0.002933 | 3636215  |
| IML1        | -3.62022 | 4.82E-10 | 3636813  |
| ISW2        | -3.62207 | 1.18E-06 | 3642235  |
| C2_07040W_A | -3.62525 | 3.7E-06  | 3643499  |
| ICL1        | -3.63199 | 1.68E-08 | 3646146  |
| C2_00690W_A | -3.64308 | 0.000305 | 3638885  |
| HSP70       | -3.64701 | 1.66E-05 | 3636229  |
| C5_04180W_A | -3.64835 | 0.000216 | 3636544  |
| CR_00040C_A | -3.65605 | 1.17E-09 | 3639675  |
| NSA2        | -3.66917 | 4.86E-10 | 3642259  |
| C4_06040W_A | -3.67246 | 0.000189 | 3646521  |
| C4_01230C_A | -3.67264 | 1.2E-06  | 3635706  |
| C6_04510C_A | -3.67663 | 2.13E-08 | 3645955  |
| C2_05830C_A | -3.67724 | 1.61E-08 | 3647483  |
| C7_01170C_A | -3.68941 | 0.000216 | 3645914  |
| C2_06510W_A | -3.70847 | 3.68E-08 | 3646570  |
| CR_03260W_A | -3.71052 | 2.25E-07 | 30515389 |
| C2_03000C_A | -3.71597 | 2.82E-07 | 3643022  |
| C2_06570C_A | -3.71808 | 5.39E-09 | 3646561  |
| ELF1        | -3.72375 | 1.65E-13 | 3641903  |
| CR_07940W_A | -3.72767 | 4.74E-05 | 3644139  |

|             |          |          |          |
|-------------|----------|----------|----------|
| C1_11020W_A | -3.73531 | 9.82E-06 | 3644420  |
| C1_13380W_A | -3.73926 | 0.000391 | 3636217  |
| C2_02110C_A | -3.74086 | 0.000307 | 3635745  |
| C5_02020C_A | -3.74619 | 1.22E-12 | 3643771  |
| C5_04050W_A | -3.74955 | 2.88E-10 | 3647735  |
| LIP4        | -3.75194 | 9.47E-09 | 3645987  |
| NOP13       | -3.75296 | 8.53E-12 | 3638469  |
| C3_05450C_A | -3.75377 | 3.02E-09 | 3643669  |
| C3_00410C_A | -3.75406 | 0.005491 | 3640552  |
| SSF1        | -3.75743 | 2.04E-09 | 3647085  |
| HIP1        | -3.76706 | 6.66E-12 | 3643761  |
| C3_02350W_A | -3.77047 | 3.09E-12 | 3636618  |
| C4_00690C_A | -3.77091 | 3.39E-09 | 3645752  |
| MSS51       | -3.77732 | 1.82E-10 | 3639031  |
| CKS1        | -3.78812 | 1.25E-08 | 3647732  |
| C1_05790W_A | -3.78913 | 0.000552 | 30515002 |
| ENP2        | -3.79367 | 8.79E-12 | 3646234  |
| C1_10140C_A | -3.79863 | 2.96E-07 | 3634780  |
| C2_02270C_A | -3.81176 | 1.29E-07 | 3635805  |
| C1_02470W_A | -3.81228 | 0.01603  | 3636851  |
| CSP1        | -3.81351 | 0.011985 | 3648242  |
| C4_03230C_A | -3.81382 | 0.012116 | 3637836  |
| SOF1        | -3.8158  | 2.29E-11 | 3640585  |
| SEN15       | -3.82396 | 0.000331 | 3646411  |
| PEL1        | -3.83096 | 2.98E-09 | 3637989  |
| C4_04660C_A | -3.83315 | 2.45E-14 | 3641150  |
| C2_10170C_A | -3.83559 | 7.55E-10 | 3643931  |
| MSB2        | -3.83858 | 1.34E-13 | 3635830  |
| C6_04240W_A | -3.84705 | 0.000278 | 3646276  |
| C5_03150W_A | -3.85455 | 1.23E-08 | 3637799  |
| C2_08180C_A | -3.85912 | 7.6E-09  | 3642317  |
| RPF1        | -3.87085 | 1.85E-09 | 3637890  |
| C1_11610C_A | -3.873   | 1.34E-10 | 3645345  |
| C3_06160C_A | -3.88174 | 1.08E-10 | 3641766  |
| CR_02420W_A | -3.89143 | 1.7E-08  | 3644926  |
| CR_05640C_A | -3.89285 | 0.000453 | 3646690  |
| C5_01470C_A | -3.89332 | 0.000686 | 3647050  |
| C1_07130C_A | -3.89453 | 9.06E-11 | 3644462  |
| C6_03210C_A | -3.89666 | 2.56E-06 | 3639178  |
| TPS2        | -3.90761 | 1.52E-10 | 3636892  |
| TCC1        | -3.91376 | 1.24E-12 | 3638524  |
| C6_04050W_A | -3.91479 | 4.18E-07 | 3647830  |
| C2_02280W_A | -3.92087 | 5E-10    | 3635806  |
| C2_07250C_A | -3.92601 | 0.000883 | 3643487  |
| CR_03840C_A | -3.93072 | 0.01729  | 3643184  |
| SLD1        | -3.9337  | 1.12E-10 | 3638406  |
| SGD1        | -3.94069 | 5.53E-11 | 3643191  |

|             |          |          |         |
|-------------|----------|----------|---------|
| RIM2        | -3.95    | 5.59E-07 | 3645448 |
| BRE1        | -3.95566 | 8.52E-13 | 3641568 |
| C1_09040C_A | -3.95777 | 4.92E-08 | 3634769 |
| DBP2        | -3.95825 | 3.69E-08 | 3647692 |
| C1_13880C_A | -3.96016 | 1.98E-11 | 3636133 |
| C6_04300W_A | -3.96453 | 3.98E-08 | 3646286 |
| DAL8        | -3.96579 | 4.07E-05 | 3635181 |
| IFH1        | -3.96944 | 3.78E-09 | 3637770 |
| C1_01710W_A | -3.9702  | 1.44E-10 | 3640201 |
| NBN1        | -3.9736  | 2.17E-09 | 3637410 |
| C1_09710C_A | -3.98053 | 1.78E-12 | 3634818 |
| SHA3        | -3.98962 | 4.67E-10 | 3644580 |
| ADR1        | -3.99508 | 2.14E-10 | 3637866 |
| DFI1        | -3.99791 | 7.08E-15 | 3638038 |
| C6_04140C_A | -3.99976 | 8.1E-10  | 3647970 |
| C4_00820W_A | -4.00537 | 0.0001   | 3645741 |
| CTN3        | -4.00796 | 8.31E-10 | 3647396 |
| CR_09440C_A | -4.00926 | 4.62E-10 | 3641937 |
| C2_09500W_A | -4.01076 | 1.43E-11 | 3643817 |
| BOI2        | -4.01291 | 3.94E-11 | 3640404 |
| C1_04820C_A | -4.01438 | 0.000153 | 3644787 |
| LPI9        | -4.01622 | 2.05E-12 | 3637060 |
| C1_00860W_A | -4.02311 | 9.93E-07 | 3639358 |
| C2_05990C_A | -4.02702 | 0.001614 | 3644074 |
| C7_03480W_A | -4.02964 | 4.09E-08 | 3646230 |
| PCL5        | -4.03594 | 2.9E-11  | 3636466 |
| CR_00460C_A | -4.04829 | 2.56E-06 | 3639726 |
| NPR2        | -4.04899 | 2.07E-08 | 3638360 |
| MED3        | -4.06064 | 4.98E-07 | 3646522 |
| NAN1        | -4.06115 | 6.15E-11 | 3637932 |
| RPD3        | -4.06181 | 1.41E-11 | 3642580 |
| C3_07070C_A | -4.06984 | 8.45E-06 | 3638446 |
| BUD14       | -4.07078 | 1.94E-09 | 3643469 |
| TPT1        | -4.07212 | 1.83E-07 | 3640543 |
| MTG1        | -4.08746 | 4.58E-06 | 3645139 |
| UGA3        | -4.09129 | 7.8E-14  | 3638926 |
| ISA2        | -4.09585 | 8.9E-13  | 3638513 |
| SSK1        | -4.09656 | 7.73E-10 | 3636184 |
| C6_00520W_A | -4.10244 | 0.007265 | 3647147 |
| CR_02700W_A | -4.10473 | 0.012952 | 3642575 |
| C6_00380C_A | -4.10506 | 3.9E-10  | 3646085 |
| C7_01020C_A | -4.12171 | 2.9E-09  | 3638020 |
| C5_03260C_A | -4.1221  | 6.08E-07 | 3646360 |
| C1_05370C_A | -4.12861 | 1.18E-09 | 3642481 |
| RRP15       | -4.13    | 4.22E-10 | 3648397 |
| ZCF29       | -4.13165 | 3.35E-13 | 3641370 |
| MIF2        | -4.15186 | 1.19E-15 | 3639220 |

|             |          |          |          |
|-------------|----------|----------|----------|
| CR_09610C_A | -4.1566  | 7.25E-08 | 3647094  |
| MNN14       | -4.16376 | 2.76E-12 | 3643651  |
| C2_07280W_A | -4.16503 | 0.004063 | 3643475  |
| PFK26       | -4.17486 | 1.67E-10 | 3634912  |
| PRP8        | -4.18433 | 4.14E-14 | 3642125  |
| CR_06980W_A | -4.20133 | 0.000612 | 3645735  |
| CR_06970C_A | -4.21397 | 7.87E-08 | 3645736  |
| SIR2        | -4.21601 | 7.34E-06 | 3638845  |
| FZO1        | -4.21917 | 9.68E-11 | 3646848  |
| PTC5        | -4.22874 | 2.51E-17 | 3642072  |
| ISU1        | -4.23126 | 6.19E-13 | 3637007  |
| C6_04400W_A | -4.24447 | 0.000316 | 3645949  |
| SOK1        | -4.24848 | 4.06E-11 | 3642495  |
| C3_05460W_A | -4.24909 | 6.52E-07 | 3643670  |
| FHL1        | -4.25649 | 1.83E-14 | 3643493  |
| RRP9        | -4.2588  | 1.88E-11 | 3642576  |
| C7_02110W_A | -4.26644 | 5.7E-12  | 3637022  |
| NAR1        | -4.27099 | 4.71E-14 | 3634916  |
| CR_09920W_A | -4.27332 | 3.68E-12 | 3639028  |
| C7_03590C_A | -4.27966 | 1.06E-11 | 3646239  |
| C2_08950W_A | -4.2801  | 3.21E-11 | 3645788  |
| PRM9        | -4.28195 | 0.033636 | 30515173 |
| HCA4        | -4.28786 | 2.99E-12 | 3637911  |
| C4_04190C_A | -4.30079 | 0.039188 | 3646860  |
| C6_02230W_A | -4.30167 | 9.26E-12 | 3645866  |
| C3_07910W_A | -4.30607 | 0.044644 | 3647449  |
| DAC1        | -4.31197 | 4.06E-09 | 3645967  |
| ENP1        | -4.33419 | 2.99E-10 | 3647861  |
| ZCF35       | -4.34523 | 5.53E-08 | 3641740  |
| RPA12       | -4.34644 | 6.1E-06  | 3643477  |
| MOH1        | -4.34949 | 9.58E-05 | 3646809  |
| CR_04110W_A | -4.35716 | 8.44E-14 | 3641026  |
| BMT5        | -4.35919 | 2.07E-12 | 3635781  |
| CR_04710W_A | -4.35945 | 0.000677 | 3648141  |
| C1_14380C_A | -4.36299 | 1.86E-09 | 3643285  |
| COX19       | -4.36475 | 1.58E-06 | 3636220  |
| C2_05980C_A | -4.37396 | 0.000192 | 3644075  |
| SPO72       | -4.37462 | 4.93E-15 | 3644072  |
| C7_03270W_A | -4.37551 | 8.2E-11  | 3641365  |
| FTH2        | -4.38644 | 8.42E-08 | 3640401  |
| C3_07290W_A | -4.38725 | 1.45E-11 | 3638430  |
| FGR23       | -4.40485 | 2.21E-09 | 3636555  |
| DIP2        | -4.40797 | 1.77E-18 | 3640762  |
| LAS1        | -4.41864 | 1.05E-10 | 3644073  |
| CR_08680C_A | -4.43076 | 1.16E-16 | 3642127  |
| ECM1        | -4.4326  | 9.67E-06 | 3641224  |
| C7_03380W_A | -4.43464 | 5.13E-07 | 30515359 |

|             |          |          |         |
|-------------|----------|----------|---------|
| C2_03500W_A | -4.43601 | 1.18E-16 | 3637345 |
| GPT1        | -4.43678 | 0.000914 | 3647671 |
| CR_02550C_A | -4.43682 | 7.17E-11 | 3647689 |
| C6_01400W_A | -4.44008 | 0.007154 | 3641604 |
| AAF1        | -4.45325 | 5.94E-18 | 3642284 |
| IHD1        | -4.45483 | 0.001357 | 3640291 |
| C2_05810W_A | -4.46435 | 2.48E-09 | 3647481 |
| C1_09650W_A | -4.46985 | 3.28E-17 | 3634870 |
| CR_03250C_A | -4.47441 | 1.28E-13 | 3645102 |
| AHR1        | -4.47694 | 1.57E-10 | 3641733 |
| C2_03570C_A | -4.48375 | 4.44E-05 | 3637336 |
| NDT80       | -4.49197 | 1.63E-17 | 3638840 |
| SEF1        | -4.49688 | 1.53E-15 | 3644945 |
| HNMI        | -4.49874 | 9.39E-11 | 3638857 |
| C4_00460C_A | -4.5088  | 3.37E-19 | 3645010 |
| C1_10250C_A | -4.51032 | 0.000214 | 3634882 |
| C7_00340C_A | -4.51659 | 5.45E-14 | 3638040 |
| CNS1        | -4.52897 | 7.68E-12 | 3639365 |
| IFM3        | -4.53155 | 1E-06    | 3642335 |
| C4_00260W_A | -4.54129 | 3.96E-17 | 3645037 |
| C6_04530C_A | -4.55277 | 1.15E-18 | 3645970 |
| C4_02260C_A | -4.56039 | 1.51E-07 | 3635690 |
| YWP1        | -4.5628  | 2.09E-13 | 3643915 |
| SIP5        | -4.5752  | 8.94E-14 | 3639865 |
| FUN31       | -4.59889 | 3.47E-13 | 3642249 |
| C2_09000C_A | -4.59917 | 0.000671 | 3645782 |
| C4_06620C_A | -4.60726 | 2.56E-05 | 3642813 |
| TSR2        | -4.60777 | 3.84E-09 | 3636845 |
| C6_01040C_A | -4.62725 | 4.1E-12  | 3644014 |
| ALP1        | -4.65449 | 7.53E-15 | 3644437 |
| PDR16       | -4.65452 | 9.93E-11 | 3644679 |
| CR_10760C_A | -4.65523 | 7.95E-06 | 3638943 |
| KAR4        | -4.65524 | 7.17E-06 | 3644937 |
| C4_03020W_A | -4.65584 | 2.9E-13  | 3637934 |
| ATO10       | -4.66239 | 0.003146 | 3640394 |
| C6_03000C_A | -4.66382 | 0.002894 | 3639194 |
| PAM18       | -4.67314 | 1.26E-08 | 3645747 |
| C6_00170C_A | -4.67721 | 2.4E-19  | 3647903 |
| C1_00270W_A | -4.67884 | 1.7E-16  | 3639300 |
| RPO41       | -4.68321 | 7.15E-18 | 3639378 |
| TPO4        | -4.6839  | 3.26E-11 | 3640956 |
| C5_04530W_A | -4.68587 | 3.5E-09  | 3636507 |
| C3_02840W_A | -4.6907  | 0.000317 | 3638331 |
| NCS2        | -4.69942 | 2.85E-16 | 3643216 |
| GCA1        | -4.70082 | 3.23E-05 | 3634903 |
| C1_10440W_A | -4.70608 | 5.53E-12 | 3647180 |
| C1_00090W_A | -4.71013 | 0.000201 | 3639304 |

|             |          |          |          |
|-------------|----------|----------|----------|
| MDJ1        | -4.71451 | 2.8E-14  | 3646980  |
| IFF6        | -4.7179  | 4.23E-13 | 3644087  |
| C1_04720W_A | -4.72755 | 2.54E-07 | 30514988 |
| C3_02420C_A | -4.73019 | 2.44E-07 | 3638342  |
| C1_06760C_A | -4.7302  | 3.92E-17 | 3639505  |
| C6_04200C_A | -4.73155 | 5.82E-06 | 30515344 |
| C2_06660W_A | -4.73475 | 1.25E-05 | 3648418  |
| GST3        | -4.73475 | 0.047253 | 3645278  |
| EPL1        | -4.74001 | 1.51E-14 | 3639732  |
| CR_01630C_A | -4.74597 | 0.000263 | 3640085  |
| C5_03460C_A | -4.7606  | 8.82E-06 | 3646345  |
| C1_09330W_A | -4.77549 | 7.68E-06 | 3634802  |
| C1_09130W_A | -4.78524 | 1.35E-12 | 3634943  |
| DOT4        | -4.79464 | 1.47E-17 | 3646810  |
| BUD5        | -4.80028 | 1.39E-13 | 3647315  |
| C3_02630C_A | -4.82308 | 6.92E-08 | 3638328  |
| C3_03690W_A | -4.83605 | 0.00443  | 3645647  |
| C1_08890C_A | -4.83685 | 0.004511 | 3634924  |
| C5_02680W_A | -4.84172 | 4.19E-14 | 3637774  |
| C1_06510C_A | -4.84468 | 5.61E-16 | 3639549  |
| C7_02660C_A | -4.85504 | 0.001218 | 3647652  |
| C2_09660W_A | -4.85611 | 2.06E-15 | 3643793  |
| C1_07530W_A | -4.85738 | 0.000529 | 30515025 |
| CR_08650C_A | -4.87366 | 1.15E-15 | 3642124  |
| ZCF30       | -4.88806 | 8.53E-14 | 3642051  |
| NOP8        | -4.88933 | 5.81E-12 | 3646290  |
| C3_07550C_A | -4.88957 | 5.55E-14 | 3638525  |
| C3_06560W_A | -4.89485 | 1.3E-11  | 3642276  |
| MIH1        | -4.91109 | 1.83E-10 | 3648188  |
| C4_03350C_A | -4.91343 | 1.64E-12 | 3646794  |
| C2_08450W_A | -4.91405 | 1.83E-11 | 3643905  |
| REI1        | -4.91499 | 2.03E-12 | 3647536  |
| NOP4        | -4.93205 | 3.93E-18 | 3647991  |
| C3_07400W_A | -4.93254 | 1.64E-11 | 3638471  |
| FLU1        | -4.94634 | 2.89E-09 | 3637048  |
| C3_07650C_A | -4.96455 | 2.32E-06 | 3638488  |
| C4_01420W_A | -4.97296 | 6.16E-12 | 3635626  |
| HIT1        | -4.9799  | 1.47E-05 | 3637854  |
| RAD3        | -5.00374 | 3.68E-20 | 3638014  |
| C4_02170C_A | -5.00522 | 0.000185 | 3635667  |
| C1_05930C_A | -5.01775 | 1.63E-13 | 3639862  |
| MUP1        | -5.02397 | 2.13E-20 | 3642008  |
| C4_01960C_A | -5.03159 | 3.14E-14 | 3635664  |
| C7_03500W_A | -5.03441 | 1.59E-10 | 3646246  |
| CSP2        | -5.04551 | 0.00195  | 3645749  |
| CR_01710W_A | -5.04602 | 7.37E-08 | 3640130  |
| CCE1        | -5.04612 | 0.001809 | 3640395  |

|             |          |          |          |
|-------------|----------|----------|----------|
| MIT1        | -5.04666 | 1.65E-14 | 3644089  |
| OLE2        | -5.04802 | 2.98E-15 | 3643503  |
| C2_09570C_A | -5.04894 | 8.64E-05 | 3643811  |
| YHB1        | -5.07632 | 2.45E-16 | 3647353  |
| C6_01620W_A | -5.08499 | 1.1E-08  | 3641647  |
| RMS1        | -5.09067 | 4.42E-12 | 3646361  |
| C1_06350W_A | -5.09596 | 9.77E-20 | 3639562  |
| C3_00230C_A | -5.11751 | 1.97E-05 | 3640557  |
| ARG1        | -5.13218 | 5.87E-12 | 3639691  |
| CR_00810W_A | -5.15239 | 1.76E-06 | 3640415  |
| C1_08830C_A | -5.16249 | 0.029578 | 3634918  |
| SRP40       | -5.171   | 3.05E-16 | 3642605  |
| SNT1        | -5.17267 | 5.75E-18 | 3642033  |
| HAP2        | -5.1767  | 5.47E-15 | 3641800  |
| TRK1        | -5.18113 | 2.31E-19 | 3644153  |
| C5_03800W_A | -5.18387 | 1.23E-14 | 3647230  |
| DHH1        | -5.18966 | 2.16E-12 | 3639490  |
| C3_01110C_A | -5.19239 | 0.011155 | 3639835  |
| ARG8        | -5.19341 | 2.38E-12 | 3641131  |
| CAG1        | -5.21714 | 1.45E-05 | 3636469  |
| C2_05640W_A | -5.23505 | 5.87E-12 | 3645566  |
| PAN6        | -5.24785 | 1.06E-13 | 3647684  |
| C4_07170C_A | -5.2499  | 2.29E-05 | 30515289 |
| C2_06800C_A | -5.26534 | 9.47E-10 | 3643518  |
| C4_04560C_A | -5.27352 | 3.18E-20 | 3641105  |
| CR_10470C_A | -5.3069  | 1E-15    | 3638979  |
| KRE1        | -5.31272 | 4.02E-10 | 3643180  |
| C4_00490W_A | -5.33192 | 4.24E-13 | 3645013  |
| C2_06740W_A | -5.35005 | 1.16E-14 | 3648024  |
| MET2        | -5.35908 | 3.87E-18 | 3640070  |
| C2_02300W_A | -5.37462 | 2.88E-08 | 3635808  |
| C7_01690W_A | -5.37553 | 4.76E-11 | 3636980  |
| MTLA2       | -5.38951 | 0.027783 | 3643766  |
| C5_03510C_A | -5.39498 | 2.22E-10 | 3646969  |
| C2_01240C_A | -5.39922 | 1.61E-05 | 3638794  |
| C2_02920W_A | -5.40693 | 3.49E-25 | 3643016  |
| HSP78       | -5.41188 | 6.13E-13 | 3637414  |
| IFR1        | -5.41223 | 7.95E-05 | 3643930  |
| CR_09800C_A | -5.42138 | 1.44E-21 | 3638984  |
| C1_07220W_A | -5.42209 | 1.85E-19 | 3644460  |
| C3_01770C_A | -5.42289 | 5.53E-09 | 3636588  |
| OPT2        | -5.43812 | 7.37E-07 | 3644915  |
| C5_03920C_A | -5.46672 | 4.81E-13 | 3647448  |
| C1_08630W_A | -5.46802 | 2.14E-16 | 3634928  |
| C5_00570W_A | -5.47272 | 4.66E-16 | 3641589  |
| C1_07980C_A | -5.47286 | 1.12E-19 | 3640696  |
| SUA71       | -5.47448 | 1.58E-17 | 3636879  |



|             |          |          |          |
|-------------|----------|----------|----------|
| C2_00410C_A | -5.47474 | 3.52E-27 | 3638820  |
| C3_07570C_A | -5.47475 | 4.33E-14 | 3638522  |
| AUR1        | -5.48801 | 1.9E-19  | 3642617  |
| YPT53       | -5.49122 | 5.55E-15 | 3642483  |
| C1_01150C_A | -5.49651 | 3.13E-20 | 3640203  |
| TRY3        | -5.49771 | 1.36E-15 | 3642652  |
| CR_10060W_A | -5.51503 | 5.72E-18 | 3639035  |
| C3_06700C_A | -5.51544 | 3.69E-17 | 3642247  |
| C6_00530C_A | -5.52235 | 3.36E-06 | 30515326 |
| PRP5        | -5.52432 | 4.49E-17 | 3638447  |
| HRR25       | -5.53051 | 8.41E-21 | 3645878  |
| ATS1        | -5.53251 | 1.83E-10 | 3642079  |
| C4_03000C_A | -5.54568 | 2.13E-09 | 3637935  |
| RSN1        | -5.56779 | 8.21E-10 | 3638308  |
| C1_11080W_A | -5.58728 | 1.1E-22  | 3644416  |
| UTP9        | -5.5884  | 9.98E-21 | 3638451  |
| RIM101      | -5.61683 | 3.69E-19 | 3643280  |
| BUD22       | -5.62256 | 8.89E-14 | 3640391  |
| CR_00310C_A | -5.62325 | 2.08E-18 | 3639715  |
| C5_04860C_A | -5.62461 | 8.57E-05 | 3636437  |
| C7_01940C_A | -5.63776 | 2.1E-18  | 3636971  |
| C3_00620C_A | -5.63819 | 3.68E-15 | 30515171 |
| CAN1        | -5.6407  | 5.3E-24  | 3644035  |
| GAP4        | -5.69972 | 2.22E-18 | 3644463  |
| KTI12       | -5.70194 | 4.11E-12 | 3645140  |
| C1_09790C_A | -5.7082  | 7.47E-23 | 3634843  |
| C5_03210C_A | -5.73915 | 0.025862 | 3646364  |
| C3_07370W_A | -5.74772 | 2.08E-16 | 3638474  |
| HAP42       | -5.77922 | 6.34E-14 | 3635729  |
| CR_03360W_A | -5.78288 | 1.92E-15 | 3645141  |
| IFM1        | -5.7957  | 8.35E-13 | 3641389  |
| CR_04600W_A | -5.79781 | 1.12E-17 | 3640950  |
| C6_04180W_A | -5.79831 | 1.35E-17 | 3648176  |
| C2_08920W_A | -5.80308 | 2.58E-21 | 3645797  |
| C2_05750W_A | -5.83428 | 1.19E-19 | 3645577  |
| C5_04120C_A | -5.85568 | 1.88E-10 | 3636522  |
| AUT7        | -5.85706 | 1.39E-17 | 30514999 |
| OPY2        | -5.85977 | 4.73E-23 | 3640765  |
| C3_05840W_A | -5.86668 | 0.020502 | 3641757  |
| C6_00290W_A | -5.86677 | 8.06E-16 | 3646069  |
| C3_01340W_A | -5.86716 | 0.022401 | 3636650  |
| RPC10       | -5.90306 | 7.79E-16 | 3643292  |
| C2_01540W_A | -5.90311 | 1.42E-13 | 3635804  |
| C6_01590W_A | -5.90746 | 1.22E-25 | 3641650  |
| FET34       | -5.91869 | 9.63E-21 | 3647131  |
| C1_11000C_A | -5.93999 | 9.3E-12  | 3644422  |
| C7_04090C_A | -5.94406 | 1.61E-22 | 3643135  |

|             |          |          |          |
|-------------|----------|----------|----------|
| C5_01730W_A | -5.96345 | 5.05E-06 | 3643730  |
| C4_02520C_A | -5.97036 | 8.94E-17 | 3637863  |
| ATO6        | -5.97417 | 9.64E-06 | 3643664  |
| C3_06420C_A | -5.98049 | 3.94E-15 | 3642262  |
| DRE2        | -5.98202 | 1.07E-18 | 3642571  |
| CR_03320C_A | -5.99941 | 0.032394 | 3645096  |
| C2_10130W_A | -6.01483 | 0.001082 | 3643935  |
| NOP6        | -6.02766 | 1.67E-13 | 3639507  |
| RGS2        | -6.03159 | 3.85E-16 | 3646629  |
| C2_04110W_A | -6.03928 | 1.27E-05 | 3637378  |
| C1_14330W_A | -6.04508 | 1.13E-09 | 3643278  |
| PHO84       | -6.07279 | 2.28E-10 | 3645348  |
| C5_04080C_A | -6.0812  | 3.09E-15 | 3647731  |
| C5_02320C_A | -6.09999 | 3.31E-09 | 3637788  |
| ALS5        | -6.16116 | 6.85E-18 | 3640277  |
| C2_10810W_A | -6.19402 | 1.41E-16 | 3641243  |
| C1_07660W_A | -6.19785 | 3.2E-07  | 3646656  |
| PHR3        | -6.21502 | 1.44E-23 | 3645003  |
| CR_02030C_A | -6.22322 | 1.01E-15 | 3640152  |
| KRE6        | -6.24519 | 3.24E-14 | 3641756  |
| PUF3        | -6.25731 | 1.28E-17 | 3646950  |
| CPA1        | -6.26036 | 2.75E-10 | 3635715  |
| C7_03850W_A | -6.34449 | 1.55E-14 | 3643145  |
| C6_02290C_A | -6.34486 | 1.65E-16 | 3645873  |
| C2_04700C_A | -6.39203 | 4.64E-06 | 3647794  |
| C6_03800C_A | -6.40506 | 3.25E-13 | 3640310  |
| PGA13       | -6.41719 | 0.00982  | 3642138  |
| C1_13390W_A | -6.44571 | 1.39E-08 | 3636218  |
| C4_07040W_A | -6.48264 | 2.92E-05 | 3642963  |
| C5_01020C_A | -6.5031  | 0.004294 | 30515297 |
| C7_00330C_A | -6.54887 | 1.34E-13 | 3638042  |
| VTC4        | -6.56184 | 2.12E-25 | 3646795  |
| GST2        | -6.56577 | 6.21E-18 | 3637937  |
| C3_02040C_A | -6.58129 | 4.07E-18 | 3636579  |
| C5_02980C_A | -6.59484 | 6.75E-10 | 3637816  |
| CR_09930W_A | -6.60746 | 4.3E-11  | 3639029  |
| ALD6        | -6.62763 | 2.62E-14 | 3647407  |
| WAR1        | -6.64449 | 4.81E-19 | 3644691  |
| ROA1        | -6.65362 | 4.7E-24  | 3645424  |
| C5_01560C_A | -6.66243 | 2.82E-14 | 3647064  |
| C6_01780C_A | -6.6818  | 8.49E-08 | 3641636  |
| GPD1        | -6.69392 | 8.75E-20 | 3643924  |
| TPS3        | -6.71532 | 1.28E-13 | 3641205  |
| C1_09780C_A | -6.73014 | 2.06E-19 | 3634842  |
| C3_06940W_A | -6.74345 | 4.22E-25 | 3638509  |
| ZCF28       | -6.74892 | 5.84E-08 | 3634776  |
| MDM34       | -6.77899 | 3.91E-23 | 3647517  |

|             |          |          |          |
|-------------|----------|----------|----------|
| HBR3        | -6.7972  | 1.67E-17 | 3645652  |
| TYE7        | -6.81311 | 1.73E-24 | 3636203  |
| C1_06090C_A | -6.8296  | 1.04E-17 | 3639822  |
| C3_05800W_A | -6.84326 | 1.14E-16 | 3641754  |
| CR_06550C_A | -6.86932 | 1.18E-17 | 3645260  |
| COX17       | -6.88291 | 3.8E-07  | 30515088 |
| KCS1        | -6.89409 | 2.88E-12 | 3648120  |
| ATG9        | -6.91695 | 1.01E-14 | 3635239  |
| C3_02980C_A | -6.91823 | 4.96E-08 | 3638386  |
| C2_04520C_A | -6.93731 | 1.85E-05 | 3645447  |
| SLY41       | -6.94398 | 5.54E-19 | 3647139  |
| MSS116      | -6.95057 | 7.81E-20 | 3634792  |
| C1_12750C_A | -6.97146 | 1.1E-12  | 3646818  |
| NBP35       | -7.00915 | 4.53E-21 | 3647412  |
| SNQ2        | -7.03992 | 5.52E-27 | 3640290  |
| STE11       | -7.06143 | 6.12E-25 | 3637369  |
| CTA8        | -7.07198 | 5.48E-19 | 3634947  |
| LTV1        | -7.08012 | 1.64E-19 | 3639016  |
| RRN11       | -7.08818 | 3.38E-14 | 3645276  |
| C3_03370C_A | -7.09298 | 2.25E-12 | 3638366  |
| C2_05840W_A | -7.09563 | 3.08E-16 | 3647484  |
| RRN3        | -7.1154  | 6.2E-28  | 3647925  |
| C6_02660C_A | -7.12591 | 1.55E-07 | 3639224  |
| FMP45       | -7.14511 | 4.94E-20 | 3637004  |
| AAH1        | -7.16276 | 1.07E-07 | 3643529  |
| WHI3        | -7.17093 | 6.46E-22 | 3636991  |
| CCC2        | -7.19306 | 8.88E-19 | 3637821  |
| FTH1        | -7.22689 | 1.7E-25  | 3634852  |
| PGA48       | -7.38104 | 3.51E-20 | 3647905  |
| SSY1        | -7.38816 | 1.95E-27 | 3637382  |
| SAS10       | -7.395   | 8.67E-24 | 3637899  |
| ALS6        | -7.39595 | 9.86E-15 | 3642266  |
| MRP17       | -7.40383 | 4.89E-19 | 3641548  |
| C4_01220C_A | -7.43199 | 4.83E-08 | 3635650  |
| C1_10060C_A | -7.43551 | 9.2E-07  | 3634812  |
| MAK16       | -7.44279 | 7.83E-20 | 3646920  |
| RFG1        | -7.48407 | 4.89E-34 | 3642570  |
| OYE23       | -7.48788 | 8.21E-06 | 3641618  |
| C1_05920W_A | -7.5296  | 0.001455 | 3639864  |
| C2_08030W_A | -7.57969 | 2.57E-10 | 3642309  |
| FGR46       | -7.58623 | 0.003399 | 3638989  |
| C1_02450C_A | -7.5911  | 1.58E-11 | 3636849  |
| C6_03200W_A | -7.60552 | 8.16E-23 | 3639177  |
| C1_12630C_A | -7.63205 | 1.66E-09 | 3646838  |
| C4_04200C_A | -7.63278 | 0.010367 | 3641182  |
| GZF3        | -7.63552 | 2.34E-31 | 3642563  |
| POP3        | -7.6467  | 3.81E-09 | 3638993  |

|             |          |          |          |
|-------------|----------|----------|----------|
| FLO8        | -7.67333 | 1.51E-29 | 3646292  |
| C1_13010W_A | -7.69926 | 3.51E-19 | 3636120  |
| C3_05250C_A | -7.76167 | 1.26E-14 | 3635199  |
| FYV5        | -7.79494 | 9.02E-07 | 3647057  |
| CYC3        | -7.8125  | 2.7E-28  | 3642621  |
| RAS2        | -7.85692 | 1.23E-16 | 3635211  |
| C2_03710W_A | -7.85855 | 0.037247 | 3637374  |
| GRX1        | -7.8592  | 0.029491 | 3637026  |
| NRG2        | -7.8592  | 0.029491 | 3647893  |
| C2_02220C_A | -7.85967 | 0.029116 | 3635774  |
| C4_07020C_A | -7.85967 | 0.029116 | 3642965  |
| C5_02800C_A | -7.85985 | 0.034004 | 3637807  |
| C3_04450C_A | -7.86032 | 0.029112 | 3635207  |
| C4_02190C_A | -7.86032 | 0.029112 | 3635697  |
| C2_08700C_A | -7.89303 | 6.41E-26 | 3643887  |
| CR_04220C_A | -7.92069 | 1.94E-11 | 3640943  |
| C4_05160C_A | -7.98831 | 5.69E-22 | 3647411  |
| C1_01610C_A | -8.04303 | 1.15E-09 | 3640225  |
| CR_03660C_A | -8.09509 | 5.73E-13 | 3643219  |
| C1_06750W_A | -8.09778 | 2.01E-05 | 3639506  |
| SUR2        | -8.13911 | 2.15E-14 | 3642973  |
| C7_02610C_A | -8.14457 | 2.73E-24 | 3648285  |
| MTM1        | -8.16764 | 3.71E-18 | 3642487  |
| C1_10950C_A | -8.21152 | 2.93E-24 | 3644428  |
| CR_04920W_A | -8.39487 | 1.11E-18 | 3648207  |
| SEO1        | -8.41484 | 0.000215 | 3646621  |
| EBP1        | -8.42221 | 8.01E-15 | 3644060  |
| C1_09820C_A | -8.4264  | 0.000634 | 3634846  |
| C3_00150W_A | -8.45345 | 3.49E-06 | 3640595  |
| FTR1        | -8.46961 | 7.6E-21  | 3643318  |
| C4_04300C_A | -8.53907 | 1.55E-08 | 3646843  |
| CR_08830W_A | -8.58539 | 5.88E-12 | 30515450 |
| C3_05440C_A | -8.66387 | 1.14E-08 | 3643668  |
| C2_02550C_A | -8.74994 | 0.001456 | 3635856  |
| SPO1        | -8.74994 | 0.001411 | 3647039  |
| C3_04510W_A | -8.75271 | 5.78E-11 | 3635258  |
| ARF1        | -8.75744 | 1.48E-23 | 3642130  |
| C5_01710C_A | -8.78345 | 3.23E-13 | 3643732  |
| KTI11       | -8.80141 | 1.13E-05 | 30515125 |
| CR_03980W_A | -8.82352 | 4.54E-15 | 3640964  |
| GAC1        | -8.8508  | 1.09E-22 | 3638025  |
| TAZ1        | -8.89479 | 1.14E-09 | 3644108  |
| NOG2        | -8.91403 | 3.08E-27 | 3640299  |
| ARR3        | -8.92648 | 8.35E-11 | 3642910  |
| C2_00760C_A | -8.94171 | 1.31E-19 | 3638910  |
| ZCF3        | -8.98792 | 4.58E-23 | 3645335  |
| RSM22       | -8.99134 | 2.34E-23 | 3642506  |

|             |          |          |         |
|-------------|----------|----------|---------|
| GCA2        | -9.01361 | 4.15E-22 | 3647194 |
| C4_00810C_A | -9.0399  | 2.53E-09 | 3645742 |
| C6_02950C_A | -9.08111 | 2.5E-09  | 3639188 |
| C7_04160W_A | -9.12359 | 1.62E-09 | 3643127 |
| CHR1        | -9.12782 | 1.57E-31 | 3647601 |
| C2_06520C_A | -9.26622 | 2.55E-09 | 3646571 |
| C4_01240C_A | -9.32393 | 6.95E-24 | 3635705 |
| CR_04680C_A | -9.40041 | 0.002383 | 3648142 |
| ECM22       | -9.45964 | 1.25E-20 | 3648000 |
| UTP22       | -9.61616 | 1.83E-24 | 3635760 |
| CDR1        | -9.65595 | 7.4E-30  | 3635237 |
| GCS1        | -9.7155  | 4.76E-33 | 3640742 |
| C2_10090C_A | -9.73087 | 2.66E-19 | 3643939 |
| C1_05330C_A | -9.78682 | 1.47E-26 | 3642485 |
| CEK2        | -9.80063 | 1.27E-07 | 3642459 |
| C6_03360C_A | -9.84441 | 3.15E-08 | 3639203 |
| C3_01430W_A | -9.84666 | 3.4E-12  | 3636633 |
| CDR11       | -9.92484 | 1.56E-24 | 3647389 |
| CYS3        | -9.92507 | 1.4E-31  | 3642081 |
| C1_12440W_A | -9.94521 | 0.000235 | 3642012 |
| ATG1        | -9.95089 | 1.93E-33 | 3641175 |
| CR_02910W_A | -9.97492 | 6.18E-23 | 3642586 |
| CR_08470W_A | -9.99736 | 1.48E-29 | 3642134 |
| SRR1        | -10.0261 | 3.31E-18 | 3647589 |
| WOR3        | -10.0884 | 2.67E-14 | 3641009 |
| RNR3        | -10.1754 | 3.03E-18 | 3647591 |
| C1_13250W_A | -10.1907 | 1.41E-39 | 3636143 |
| PZF1        | -10.204  | 1.23E-15 | 3648113 |
| C4_03460C_A | -10.2209 | 2.3E-05  | 3646813 |
| CR_08580C_A | -10.248  | 2.18E-11 | 3642105 |
| BRG1        | -10.3587 | 4.38E-25 | 3647664 |
| STP4        | -10.3602 | 7.21E-26 | 3637405 |
| C3_04730C_A | -10.4378 | 0.000532 | 3635250 |
| C3_05900W_A | -10.4609 | 5.95E-17 | 3641739 |
| QDR3        | -10.597  | 8.44E-15 | 3644023 |
| CTR2        | -10.6415 | 1.98E-28 | 3648427 |
| C5_02590C_A | -10.8757 | 5.34E-16 | 3637723 |
| C1_04710C_A | -10.9831 | 8.05E-15 | 3644764 |
| ELA1        | -11.1971 | 1.06E-15 | 3644680 |
| C6_00730W_A | -11.2467 | 0.007424 | 3647070 |
| CR_01250C_A | -11.2473 | 0.008001 | 3640403 |
| C3_05790C_A | -11.391  | 2.76E-09 | 3641753 |
| C2_01060C_A | -11.4649 | 8.46E-11 | 3638835 |
| C1_13130C_A | -11.5185 | 1.38E-25 | 3636202 |
| UGA6        | -11.5216 | 7.1E-07  | 3642975 |
| C4_02770C_A | -11.576  | 1.15E-11 | 3637903 |
| C1_11510C_A | -11.6151 | 1.65E-23 | 3645336 |

|             |          |          |          |
|-------------|----------|----------|----------|
| C1_01510W_A | -11.6795 | 7.18E-28 | 3640229  |
| PGA37       | -11.7365 | 3.26E-09 | 3636484  |
| SCH9        | -11.8877 | 1.4E-37  | 3637421  |
| C5_02640W_A | -11.895  | 5.58E-18 | 3637785  |
| MFG1        | -12.1363 | 2.06E-37 | 3643884  |
| C6_04420W_A | -12.231  | 8.12E-17 | 3645951  |
| FAR1        | -12.2423 | 4.55E-16 | 3637970  |
| C1_11320C_A | -12.2568 | 5.35E-22 | 30515052 |
| C1_07790C_A | -12.2667 | 8.73E-16 | 3640706  |
| C2_08580W_A | -12.3282 | 2.36E-07 | 3643916  |
| C1_10580C_A | -12.3285 | 8.35E-07 | 3647679  |
| C2_02530W_A | -12.3585 | 0.001724 | 3635819  |
| C2_02580W_A | -12.3811 | 2.27E-20 | 3635860  |
| C2_02190C_A | -12.9277 | 2.29E-21 | 3635753  |
| C1_08610C_A | -12.9307 | 7.47E-41 | 3646512  |
| QDR2        | -13.1507 | 6.14E-38 | 3643661  |
| C1_05440C_A | -13.2301 | 9.97E-15 | 3642489  |
| GRF10       | -13.401  | 3.52E-30 | 3636492  |
| DEF1        | -13.4988 | 1.39E-35 | 3639023  |
| HGT17       | -13.5297 | 1.71E-05 | 3635687  |
| SUT1        | -13.5503 | 3.93E-20 | 3637706  |
| ITR1        | -13.8712 | 8.02E-53 | 3643440  |
| C5_04840C_A | -13.9483 | 8.72E-26 | 3636435  |
| FEN1        | -13.9796 | 3.17E-18 | 3646829  |
| HEM3        | -14.0117 | 4.69E-40 | 3643940  |
| C3_06950W_A | -14.0535 | 1.77E-21 | 3638507  |
| ABC1        | -14.095  | 4.65E-32 | 3640239  |
| C2_09610W_A | -14.1862 | 6.37E-22 | 3643798  |
| RFX1        | -14.2167 | 1.53E-15 | 3644844  |
| C4_04520W_A | -14.2226 | 1.66E-32 | 3641110  |
| C6_03180C_A | -14.2364 | 3.32E-61 | 3639261  |
| C1_06870C_A | -14.5173 | 0.018295 | 30515013 |
| C1_12800W_A | -14.5173 | 0.018295 | 3646828  |
| C4_00530C_A | -14.5181 | 0.018107 | 3645746  |
| AGA1        | -14.5184 | 0.01811  | 3641536  |
| C1_05690C_A | -14.5184 | 0.018295 | 3639896  |
| C2_08350C_A | -14.5184 | 0.018295 | 3640769  |
| C2_10000C_A | -14.5184 | 0.018295 | 30515163 |
| OFI1        | -14.519  | 0.019824 | 3636225  |
| ALK6        | -14.5193 | 0.018107 | 3637045  |
| CR_04610C_A | -14.5193 | 0.018107 | 3640951  |
| C7_02000C_A | -14.5202 | 0.019438 | 3636964  |
| C2_04090W_A | -14.5851 | 0.00482  | 3637380  |
| C3_04870W_A | -14.6362 | 0.001344 | 3635226  |
| C7_03550C_A | -14.6371 | 0.001854 | 3646235  |
| CTA4        | -14.6457 | 2.69E-42 | 3641743  |
| TRY4        | -14.7061 | 1.73E-18 | 3635240  |

|             |          |          |          |
|-------------|----------|----------|----------|
| C3_03250W_A | -14.7263 | 7.18E-43 | 3638318  |
| C5_04850W_A | -14.7443 | 1.22E-08 | 3636436  |
| C4_04020C_A | -14.8212 | 0.000898 | 3641215  |
| C7_01910C_A | -14.9196 | 2.22E-26 | 3637029  |
| SEN2        | -14.9296 | 3.22E-24 | 3637832  |
| IFA14       | -15.2375 | 2.49E-12 | 3639012  |
| RPN4        | -15.2975 | 1.57E-44 | 3644684  |
| COX11       | -15.334  | 3.27E-38 | 3646842  |
| WSC1        | -15.4207 | 8.29E-31 | 3635138  |
| LIP1        | -15.7431 | 1.45E-06 | 3634888  |
| C3_05750C_A | -16.1447 | 7.27E-06 | 3641719  |
| DED1        | -16.2609 | 8.62E-44 | 3641752  |
| CR_01600C_A | -16.7845 | 1.51E-13 | 3640080  |
| C1_09320C_A | -16.7867 | 7.75E-51 | 3634834  |
| ZCF2        | -17.0157 | 3.71E-49 | 3642484  |
| RCH1        | -17.0327 | 1.81E-29 | 3645002  |
| C1_13820C_A | -17.3556 | 8.57E-34 | 3636127  |
| C2_07070W_A | -17.4091 | 7.57E-40 | 3643501  |
| CUP9        | -17.4647 | 2.48E-29 | 3636950  |
| C4_06200W_A | -17.5709 | 2.91E-06 | 30515282 |
| PTC8        | -17.5718 | 1.19E-40 | 3635674  |
| SMM1        | -17.7178 | 6.73E-21 | 3643778  |
| C6_03810W_A | -17.8375 | 5.1E-32  | 3640286  |
| C2_08530C_A | -18.088  | 1.2E-10  | 3643921  |
| C6_01870C_A | -18.118  | 2.5E-24  | 3641625  |
| CR_08080W_A | -18.2385 | 1.49E-05 | 3642094  |
| C7_02600C_A | -18.3847 | 2.97E-44 | 3648286  |
| MET1        | -18.496  | 3.78E-45 | 3643014  |
| C6_03440W_A | -18.5428 | 1.71E-30 | 3640274  |
| C4_02740W_A | -19.0194 | 2.48E-29 | 3637855  |
| C2_04670W_A | -19.0277 | 6.71E-18 | 3647789  |
| SSU81       | -19.0663 | 3.7E-22  | 3634944  |
| C5_03080C_A | -19.1169 | 1.58E-40 | 3637701  |
| C7_00630C_A | -19.2482 | 6.37E-09 | 3638028  |
| C7_00880C_A | -19.3614 | 4.23E-26 | 3638052  |
| CR_07680C_A | -19.8739 | 4.98E-09 | 3648193  |
| FRE10       | -20.0088 | 2.09E-38 | 3646841  |
| CR_08720W_A | -20.1007 | 9.42E-14 | 3642122  |
| C3_02750W_A | -20.1962 | 2.42E-06 | 3638411  |
| C1_07650W_A | -20.3098 | 1.76E-16 | 3646657  |
| ALS7        | -20.8784 | 2.07E-50 | 3642234  |
| RIM8        | -21.1266 | 1.25E-49 | 3639342  |
| C6_01020W_A | -21.2116 | 0.00694  | 3644050  |
| KSP1        | -21.267  | 2.5E-60  | 3644467  |
| MNN1        | -21.3818 | 2.1E-17  | 3637784  |
| WOR2        | -21.6015 | 6.91E-13 | 3635230  |
| RME1        | -21.6374 | 1.27E-33 | 3644453  |

|             |          |          |          |
|-------------|----------|----------|----------|
| HSP21       | -21.7154 | 2.07E-28 | 3637364  |
| C2_09880C_A | -21.8566 | 7.15E-24 | 3643779  |
| C1_01130W_A | -22.5388 | 1.28E-59 | 3640178  |
| PUT1        | -22.7263 | 1.12E-61 | 3637779  |
| OPT4        | -23.1833 | 5.13E-42 | 3647697  |
| C4_07140W_A | -23.2754 | 1.54E-48 | 3642936  |
| C1_09210C_A | -24.2635 | 8.41E-46 | 3634897  |
| CR_04940W_A | -24.6581 | 2.05E-15 | 3648209  |
| FGR47       | -24.7305 | 1.17E-66 | 3641651  |
| C3_06660C_A | -24.7998 | 0.000155 | 3642253  |
| C1_09770W_A | -25.5724 | 5.41E-36 | 3634825  |
| C1_06620C_A | -27.0355 | 0.001599 | 3639545  |
| CR_07540C_A | -27.0355 | 0.00158  | 3648001  |
| C6_03280W_A | -27.0377 | 0.001576 | 3639185  |
| FGR42       | -27.0377 | 0.001579 | 3647438  |
| C1_07040C_A | -27.0394 | 0.002002 | 3639533  |
| C5_04380C_A | -27.0768 | 1.55E-12 | 3636485  |
| C1_01620C_A | -28.466  | 6.82E-49 | 3640193  |
| C1_11410C_A | -28.8406 | 3.1E-08  | 30515054 |
| CDA2        | -30.3991 | 5.57E-10 | 3639716  |
| C4_05350W_A | -30.4761 | 6.36E-71 | 3646948  |
| C5_01990W_A | -31.3485 | 0.000193 | 3643774  |
| C5_05240C_A | -33.2952 | 0.00068  | 3636471  |
| C1_00190C_A | -33.5611 | 6.43E-36 | 3639337  |
| HSP31       | -34.0461 | 3.97E-16 | 3644589  |
| JEN2        | -35.4732 | 4.13E-25 | 3641214  |
| HAK1        | -35.5909 | 2.38E-07 | 3639546  |
| C7_01430C_A | -36.8909 | 1.91E-81 | 3636961  |
| C2_05330C_A | -38.2871 | 5.52E-32 | 3643426  |
| C2_06530W_A | -38.6995 | 2.66E-18 | 3646572  |
| ARG11       | -40.2359 | 5.59E-08 | 3635193  |
| PRX1        | -40.3126 | 1.62E-61 | 3641357  |
| GIT3        | -41.1804 | 1.37E-68 | 3642634  |
| FRE9        | -42.0899 | 1.34E-50 | 3643452  |
| C4_03340C_A | -42.2182 | 3.09E-14 | 3648090  |
| PGA57       | -42.5493 | 3.4E-08  | 3635608  |
| CFL4        | -43.4123 | 3E-14    | 3642639  |
| AOX2        | -44.5952 | 1.11E-45 | 3634945  |
| C5_04030W_A | -45.7296 | 1.44E-49 | 3647737  |
| BMT1        | -46.4745 | 1.33E-64 | 3638535  |
| CLG1        | -47.8743 | 2.86E-89 | 3646030  |
| ZCF1        | -50.4125 | 4.82E-56 | 3638329  |
| TRY6        | -51.9003 | 7.31E-07 | 3638499  |
| CR_08880C_A | -60.4004 | 2.74E-40 | 3641878  |
| SSU1        | -64.727  | 1.23E-73 | 3641882  |
| CR_06140W_A | -67.7026 | 3.21E-41 | 3644862  |
| C4_07260W_A | -70.351  | 1.78E-16 | 3642942  |



|             |          |          |          |
|-------------|----------|----------|----------|
| C2_08260W_A | -77.3753 | 4.69E-12 | 3642345  |
| C3_03460C_A | -100.623 | 1.19E-13 | 3638359  |
| C7_01680C_A | -114.134 | 2.18E-85 | 3636981  |
| C6_00810C_A | -135.115 | 2.65E-40 | 3647068  |
| C4_07000W_A | -136.008 | 0.042247 | 3642967  |
| CR_06870C_A | -136.016 | 0.042244 | 3647318  |
| C2_02130C_A | -147.088 | 1.2E-15  | 3635747  |
| PHO87       | -149.396 | 1.5E-15  | 3639861  |
| CR_01530C_A | -163.387 | 3.46E-16 | 3640072  |
| C5_00810C_A | -176.984 | 0.031332 | 3644127  |
| C2_09330C_A | -217.962 | 0.024789 | 3644106  |
| C7_00770W_A | -251.543 | 6.66E-26 | 3637959  |
| C3_07930C_A | -271.31  | 0.022461 | 3647452  |
| HSP30       | -275.508 | 2.7E-44  | 3645419  |
| CR_00840C_A | -299.927 | 0.017681 | 3640411  |
| C1_06430C_A | -340.831 | 0.01539  | 3639553  |
| CR_01510C_A | -340.893 | 0.015099 | 3640104  |
| C1_02690C_A | -342.692 | 0.015583 | 3636823  |
| C7_03560W_A | -383.892 | 2.3E-124 | 3646236  |
| GPI1        | -384.925 | 4E-34    | 3643680  |
| MRV4        | -463.776 | 0.010505 | 3636547  |
| HWP2        | -494.125 | 0.010453 | 3646803  |
| C1_05250W_A | -791.506 | 0.005147 | 3642462  |
| C3_06170C_A | -832.65  | 0.004823 | 3642272  |
| CRZ2        | -2384.7  | 1E-70    | 3645725  |
| C4_06910W_A | -5520.62 | 0.000275 | 3642933  |
| C1_14630C_A | -29635.3 | 1.54E-05 | 3643291  |
| TAR1        | -72057.2 | 0        | 30515449 |
