# Supplementary material for: Reprogramming in Candida albicans Gene Expression Network under Butanol Stress Abrogates Hyphal Development
Source: MDPI journal article supplement (doi:10.3390/ijms242417227), 2023-12-07
Supplement: s1 [file s1]

Table S3: Gene Ontology processes enriched in the induced and repressed genes sets obtained by comparing serum vs serum with butanol gene expression RPKM values

| S20 vs B20 Upregulated genes |                         |                              |                                         |                   |                      |                                                                                                                                                                                                                                                                                                                                                                                                                                                                                                                                                                                                                                                                                                                                                                                                                                                                                                                                                                                                                                                                                                                                                                                                                                                                                                                                                                                                                                                                                                                                                                                                                                                                                                                                                                                                                                                                                                                                                                                                                                                                                                        |
|------------------------------|-------------------------|------------------------------|-----------------------------------------|-------------------|----------------------|--------------------------------------------------------------------------------------------------------------------------------------------------------------------------------------------------------------------------------------------------------------------------------------------------------------------------------------------------------------------------------------------------------------------------------------------------------------------------------------------------------------------------------------------------------------------------------------------------------------------------------------------------------------------------------------------------------------------------------------------------------------------------------------------------------------------------------------------------------------------------------------------------------------------------------------------------------------------------------------------------------------------------------------------------------------------------------------------------------------------------------------------------------------------------------------------------------------------------------------------------------------------------------------------------------------------------------------------------------------------------------------------------------------------------------------------------------------------------------------------------------------------------------------------------------------------------------------------------------------------------------------------------------------------------------------------------------------------------------------------------------------------------------------------------------------------------------------------------------------------------------------------------------------------------------------------------------------------------------------------------------------------------------------------------------------------------------------------------------|
| GOID                         | GO_term                 | Cluster frequency            | Background frequency                    | Corrected P-value | False discovery rate | Gene(s) annotated to the term                                                                                                                                                                                                                                                                                                                                                                                                                                                                                                                                                                                                                                                                                                                                                                                                                                                                                                                                                                                                                                                                                                                                                                                                                                                                                                                                                                                                                                                                                                                                                                                                                                                                                                                                                                                                                                                                                                                                                                                                                                                                          |
| 34660                        | ncRNA metabolic process | 464 out of 1061 genes, 43.7% | 935 out of 6473 background genes, 14.4% | 3.02E-149         | 0.00%                | HBR1:CNS1:RPO41:NRM1:RRS1:TRI1:C1_01150C_A:C1_01160C_A:TRM2:C1_01530C_A:C1_02090C_A:ABP140:C1_02450C_A:PDE2:C1_02900C_A:TSR2:C1_03630W_A:RPP1:C1_03830C_A:C1_04040C_A:C1_04120C_A:ERB1:NOP4:C1_04510W_A:C1_04530C_A:C1_04710C_A:C1_04970W_A:RRP6:REI1:TRY2:C1_05220C_A:C1_05360C_A:C1_05380C_A:RSM22:RPS27A:FAL1:C1_05650W_A:C1_06540C_A:NOP6:C1_06760C_A:RIA1:LHP1:C1_07510W_A:C1_07660W_A:ERD1:C1_07950C_A:C1_07960W_A:FUN12:MLT1:DIP2:GCR3:GCD6:C1_08630W_A:MSS116:CEF1:C1_09390W_A:C1_09710C_A:C1_09790C_A:PDC2:DBP3:MNN23:FCY23:C1_10620W_A:RPA190:C1_10920W_A:C1_10950C_A:C1_10970W_A:C1_11000C_A:NEP1:KRR1:GAR1:MUP1:C1_11900C_A:C1_11910W_A:TRP3:C1_12280C_A:CSI2:C1_12350W_A:WRS1:C1_12440W_A:C1_12570C_A:C1_12630C_A:C1_12750C_A:C1_12760W_A:C1_12820C_A:REX3:RMP1:C1_13380W_A:MCU1:C1_13820C_A:C1_14080W_A:C1_14330W_A:MPP10:FAV3:C2_00200W_A:C2_00280C_A:C2_00410C_A:C2_00820W_A:C2_00840W_A:C2_01070W_A:C2_01220W_A:C2_01420C_A:REX2:C2_01820C_A:C2_01860C_A:C2_02120W_A:C2_02420C_A:UTP21:UTP22:PRS1:C2_02540W_A:C2_02630W_A:PDR17:MET1:PRP3:SCH9:C2_04120C_A:TBF1:SUV3:RIM2:C2_04570W_A:SNU114:C2_04700C_A:C2_04820W_A:PZF1:CKA2:C2_05050C_A:C2_05080C_A:MAK5:C2_05160C_A:RPF2:RPC40:KTI11:C2_05670C_A:C2_05750W_A:C2_05830C_A:C2_05840W_A:LAS1:ECM17:MAK16:C2_06480W_A:C2_06520C_A:C2_06530W_A:VAS1:C2_06660W_A:FHL1:C2_06850W_A:NOC4:C2_07360W_A:RCL1:PRS5:C2_07920W_A:NSA1:C2_08180C_A:EAF3:RRP8:C2_08530C_A:MSU1:UTP15:C2_09160W_A:C2_09180W_A:C2_09310C_A:PES1:TAZ1:RRP15:C2_09500W_A:C2_09660W_A:SMM1:C2_09920W_A:CWC22:PUS7:C2_10740C_A:RPC11:C2_10810W_A:RPS24:C3_00100W_A:UTP8:BUD21:SOFF1:C3_00660W_A:C3_00830C_A:BMS1:ARP9:UTP20:NCE103:C3_01310W_A:C3_01560W_A:C3_02020W_A:C3_02040C_A:UTP4:ILV2:C3_02350W_A:C3_02670W_A:C3_02840W_A:C3_02850C_A:C3_03070W_A:C3_03110W_A:C3_03330C_A:HBR3:C3_04370C_A:C3_04380C_A:MAK21:ARV1:SFP1:NOP14:CEM1:C3_05140C_A:C3_05160C_A:RPL8B:C3_05280C_A:C3_05380W_A:C3_05440C_A:QDR2:C3_05800W_A:C3_05860C_A:TRM12:C3_05900W_A:NOG1:C3_06150W_A:DOT1:ISW2:C3_06370C_A:NSA2:PRP5:NOP13:C3_07400W_A:C3_07550C_A:C3_07570C_A:RIT1:RAD4:UTP9:C3_ |

|  |  |  |  |  |                                                                                                                                                                                                                                                                                                                                                                                                                                                                                                                                                                                                                                                                                                                                                                                                                                                                                                                                                                                                                                                                                                                                                                                                                                                                                                                                                                                                                                                                                                                                                                                                                                                                                                                                                                                                                                                                                                                                                                                                                                                                                                                                 |
|--|--|--|--|--|---------------------------------------------------------------------------------------------------------------------------------------------------------------------------------------------------------------------------------------------------------------------------------------------------------------------------------------------------------------------------------------------------------------------------------------------------------------------------------------------------------------------------------------------------------------------------------------------------------------------------------------------------------------------------------------------------------------------------------------------------------------------------------------------------------------------------------------------------------------------------------------------------------------------------------------------------------------------------------------------------------------------------------------------------------------------------------------------------------------------------------------------------------------------------------------------------------------------------------------------------------------------------------------------------------------------------------------------------------------------------------------------------------------------------------------------------------------------------------------------------------------------------------------------------------------------------------------------------------------------------------------------------------------------------------------------------------------------------------------------------------------------------------------------------------------------------------------------------------------------------------------------------------------------------------------------------------------------------------------------------------------------------------------------------------------------------------------------------------------------------------|
|  |  |  |  |  | 07800C_A:DUR4:RLP24:NMD5:C4_00690C_A:C4_00740W_A:C4_00800W_A:C4_00810C_A:C4_00880W_A:C4_00940W_A:RAT1:C4_01280C_A:PWP1:C4_01500W_A:SLX4:HIT1:SAS10:RPC53:HCA4:C4_02850W_A:ZUO1:C4_02880C_A:NAN1:C4_03140C_A:C4_03170W_A:DAO2:C4_03720C_A:C4_03730C_A:C4_03740W_A:NUP84:C4_03830W_A:RRP42:RAM1:ECM1:DUO1:C4_04520W_A:SSZ1:BAS1:C4_04810C_A:AGP3:RPL30:C4_05230C_A:C4_05260W_A:C4_05360C_A:C4_05650W_A:C4_06210C_A:C4_06410W_A:NOP1:C4_06790W_A:C4_06950W_A:C4_07060W_A:C4_07150W_A:DU4:MRP17:RMT2:C5_00920W_A:BUD23:CYC3:PUS4:C5_01430C_A:FYV5:SPB4:C5_01610W_A:C5_01930W_A:C5_02010C_A:C5_02070C_A:RIX7:C5_02440C_A:SPR28:UTP13:CKB2:MSW1:C5_03010W_A:RMS1:RPO26:C5_03400C_A:C5_03920C_A:C5_04120C_A:MSM1:HAS1:C5_04840C_A:C5_04910W_A:GRF10:C5_05340W_A:NOP5:DC14:TOP1:C6_01040C_A:C6_01120C_A:CIC1:C6_01890C_A:SWD3:C6_02230W_A:ALG11:C6_02290C_A:C6_02350C_A:C6_02430W_A:MRT4:C6_02900C_A:POP4:C6_03210C_A:C6_03380W_A:C6_03390W_A:C6_03440W_A:NAM2:SPB1:C6_04240W_A:NOP8:ILS1:C6_04530C_A:C7_00160C_A:C7_00220W_A:C7_00330C_A:THG1:RPA135:NOP15:C7_01030C_A:DBP7:C7_01210C_A:C7_01270C_A:C7_01360C_A:C7_01400C_A:GIR2:FLU1:C7_01570C_A:C7_01950W_A:LIG1:C7_02340C_A:C7_02460C_A:C7_02660C_A:C7_02930C_A:C7_03400C_A:ISY1:ENP2:C7_03590C_A:ENP1:C7_03850W_A:C7_03880C_A:C7_04150W_A:UTP18:CR_00430C_A:CR_00460C_A:BUD22:PW2:CR_00830W_A:TRM1:DAL81:CR_01320C_A:CR_01410C_A:PRS:CR_01550C_A:CR_01600C_A:CR_01670W_A:CDC60:CR_01700C_A:CR_01710W_A:CR_01780W_A:CR_01950W_A:CR_02030C_A:MCM6:CR_02420W_A:CR_02550C_A:RRP9:RPC31:CR_02890C_A:SRP40:ARC1:SMC5:CR_03110W_A:CR_03200C_A:CR_03230W_A:CR_03360W_A:KTI12:CR_03400W_A:NCS2:YVH1:SMC1:PRP42:CR_03940W_A:CR_04110W_A:CR_04160C_A:CR_04170W_A:CR_04240C_A:CR_04300W_A:CR_04500C_A:CR_04710W_A:RPB8:NOC2:CR_05550C_A:RNR3:MTG2:DBP8:RFX1:RPL7:CR_06230W_A:FR50:CR_06450W_A:RRN11:CR_06680C_A:NMD3:CR_06840W_A:CR_06970C_A:POL2:CR_07030C_A:CR_07310W_A:PIF1:FUN30:CR_07640C_A:DBP6:IMP4:CR_08000C_A:NOP10:SSB1:RIO2:ATS1:CR_08330W_A:CR_08410W_A:TSR1:CR_08940W_A:MP51:SSF1:CR_09740W_A:MED21:CR_09800C_A:DPB2:SIK1:UTP5:CR_10260W_A:CR_10410C_A:CR_10470C_A:DRS1:LTV1:POP3 |
|--|--|--|--|--|---------------------------------------------------------------------------------------------------------------------------------------------------------------------------------------------------------------------------------------------------------------------------------------------------------------------------------------------------------------------------------------------------------------------------------------------------------------------------------------------------------------------------------------------------------------------------------------------------------------------------------------------------------------------------------------------------------------------------------------------------------------------------------------------------------------------------------------------------------------------------------------------------------------------------------------------------------------------------------------------------------------------------------------------------------------------------------------------------------------------------------------------------------------------------------------------------------------------------------------------------------------------------------------------------------------------------------------------------------------------------------------------------------------------------------------------------------------------------------------------------------------------------------------------------------------------------------------------------------------------------------------------------------------------------------------------------------------------------------------------------------------------------------------------------------------------------------------------------------------------------------------------------------------------------------------------------------------------------------------------------------------------------------------------------------------------------------------------------------------------------------|

|       |                  |                              |                                         |           |       |                                                                                                                                                                                                                                                                                                                                                                                                                                                                                                                                                                                                                                                                                                                                                                                                                                                                                                                                                                                                                                                                                                                                                                                                                                                                                                                                                                                                                                                                                                                                                                                                                                                                                                                                                                                                                                                                                                                                                                                                                                                                                                                                                                                                                                                                                                                                                                                                                                                                                                                                                                                                                                                              |
|-------|------------------|------------------------------|-----------------------------------------|-----------|-------|--------------------------------------------------------------------------------------------------------------------------------------------------------------------------------------------------------------------------------------------------------------------------------------------------------------------------------------------------------------------------------------------------------------------------------------------------------------------------------------------------------------------------------------------------------------------------------------------------------------------------------------------------------------------------------------------------------------------------------------------------------------------------------------------------------------------------------------------------------------------------------------------------------------------------------------------------------------------------------------------------------------------------------------------------------------------------------------------------------------------------------------------------------------------------------------------------------------------------------------------------------------------------------------------------------------------------------------------------------------------------------------------------------------------------------------------------------------------------------------------------------------------------------------------------------------------------------------------------------------------------------------------------------------------------------------------------------------------------------------------------------------------------------------------------------------------------------------------------------------------------------------------------------------------------------------------------------------------------------------------------------------------------------------------------------------------------------------------------------------------------------------------------------------------------------------------------------------------------------------------------------------------------------------------------------------------------------------------------------------------------------------------------------------------------------------------------------------------------------------------------------------------------------------------------------------------------------------------------------------------------------------------------------------|
| 34470 | ncRNA processing | 441 out of 1061 genes, 41.6% | 860 out of 6473 background genes, 13.3% | 3.45E-147 | 0.00% | HBR1:CNS1:RPO41:NRM1:RRS1:TRI1:C1_01150C_A:C1_01160C_A:TRM2:C1_02090C_A:ABP140:C1_02450C_A:PDE2:C1_02900C_A:TSR2:C1_03630W_A:RPP1:C1_03830C_A:C1_04040C_A:C1_04120C_A:ERB1:NOP4:C1_04510W_A:C1_04530C_A:C1_04710C_A:C1_04970W_A:RRP6:REI1:TRY2:C1_05220C_A:C1_05360C_A:C1_05380C_A:RSM22:RPS27A:FAL1:C1_05650W_A:C1_06540C_A:NOP6:C1_06760C_A:RIA1:LHP1:C1_07510W_A:C1_07660W_A:ERD1:C1_07950C_A:C1_07960W_A:FUN12:MLT1:DI P2:GCR3:GCD6:C1_08630W_A:MSS116:CEF1:C1_09390W_A:C1_09710C_A:C1_09790C_A:PDC2:DBP3:MNN23:FCY23:C1_10620W_A:C1_10950C_A:C1_10970W_A:C1_11000C_A:NEP1:KRR1:MUP1:C1_11900C_A:C1_11910W_A:TRP3:C1_12280C_A:CSI 2:C1_12350W_A:C1_12440W_A:C1_12570C_A:C1_12630C_A:C1_12750C_A:C1_12760W_A:C1_12820C_A:REX3:RMP1:C1_13380W_A:MCU1:C1_13820C_A:C1_14080W_A:C1_14330W_A:MPP10:FAV3:C2_00200W_A:C2_00280C_A:C2_00410C_A:C2_00820W_A:C2_00840W_A:C2_01070W_A:C2_01220W_A:C2_01420C_A:REX2:C2_01820C_A:C2_01860C_A:C2_02120W_A:C2_02420C_A:UTP21:UTP22:PRS1:C2_02540W_A:C2_02630W_A:PDR17:MET1:PRP3:SCH9:C2_04120C_A:TBF1:SUV3:RIM2:C2_04570W_A:SNU114:C2_04700C_A:C2_04820W_A:PZF1:CKA2:C2_05050C_A:C2_05080C_A:MAK5:C2_05160C_A:RPF2:KTI11:C2_05670C_A:C2_05750W_A:C2_05830C_A:C2_05840W_A:LAS1:ECM17:MAK16:C2_06480W_A:C2_06520C_A:C2_06530W_A:C2_06660W_A:FHL1:C2_06850W_A:NOC4:C2_07360W_A:RCL1:PRS5:C2_07920W_A:NSA1:C2_08180C_A:EAF3:RRP8:C2_08530C_A:MSU1:UTP15:C2_09160W_A:C2_09180W_A:C2_09310C_A:PES1:TAZ1:RRP15:C2_09500W_A:C2_09660W_A:SMM1:C2_09920W_A:CWC22:PUS7:C2_10740C_A:C2_10810W_A:RPS24:C3_00100W_A:UTP8:BUD21:SOF1:C3_00660W_A:C3_00830C_A:BMS1:ARP9:UTP20:NCE103:C3_01310W_A:C3_01560W_A:C3_02020W_A:C3_02040C_A:UTP4:ILV2:C3_02350W_A:C3_02670W_A:C3_02840W_A:C3_02850C_A:C3_03070W_A:C3_03110W_A:C3_03330C_A:HBR3:C3_04370C_A:C3_04380C_A:MAK21:ARV1:SFP1:NOP14:CEM1:C3_05140C_A:C3_05160C_A:RPL8B:C3_05280C_A:C3_05380W_A:C3_05440C_A:QDR2:C3_05800W_A:C3_05860C_A:TRM12:C3_05900W_A:NOG1:C3_06150W_A:DOT1:ISW2:C3_06370C_A:NSA2:PRP5:NOP13:C3_07400W_A:C3_07550C_A:C3_07570C_A:RIT1:RAD4:UTP9:C3_07800C_A:DUR4:RLP24:NMD5:C4_00690C_A:C4_00740W_A:C4_00800W_A:C4_00810C_A:C4_00880W_A:C4_00940W_A:RAT1:C4_01280C_A:PWP1:C4_01500W_A:SLX4:HIT1:SAS10:RPC53:HCA4:C4_02850W_A:ZUO1:C4_02880C_A:NAN1:C4_03140C_A:C4_03170W_A:DAO2:C4_03720C_A:C4_03730C_A:C4_03740W_A:NUP84:C4_03830W_A:RRP42:RAM1:ECM1:DUO1:C4_04520W_A:SSZ1:BAS1:C4_04810C_A:AGP3:RPL30:C4_05230C_A:C4_05260W_A:C4_05360C_A:C4_05650W_A:C4_06210C_A:C4_06410W_A:NOP1:C4_06790W_A:C4_06950W_A:C4_07060W_A:C4_07150W_A:DUS4:MRP17:RMT2:C5_00920W_A:BUD23:CYC3:PUS4:C5_01430C_A:FYV5:SPB4:C5_01610W_A:C5_01930W_A:C5_02010C_A:C5_02070C_A:RIX7:C5_024 |
|-------|------------------|------------------------------|-----------------------------------------|-----------|-------|--------------------------------------------------------------------------------------------------------------------------------------------------------------------------------------------------------------------------------------------------------------------------------------------------------------------------------------------------------------------------------------------------------------------------------------------------------------------------------------------------------------------------------------------------------------------------------------------------------------------------------------------------------------------------------------------------------------------------------------------------------------------------------------------------------------------------------------------------------------------------------------------------------------------------------------------------------------------------------------------------------------------------------------------------------------------------------------------------------------------------------------------------------------------------------------------------------------------------------------------------------------------------------------------------------------------------------------------------------------------------------------------------------------------------------------------------------------------------------------------------------------------------------------------------------------------------------------------------------------------------------------------------------------------------------------------------------------------------------------------------------------------------------------------------------------------------------------------------------------------------------------------------------------------------------------------------------------------------------------------------------------------------------------------------------------------------------------------------------------------------------------------------------------------------------------------------------------------------------------------------------------------------------------------------------------------------------------------------------------------------------------------------------------------------------------------------------------------------------------------------------------------------------------------------------------------------------------------------------------------------------------------------------------|

|  |  |  |  |  |  |                                                                                                                                                                                                                                                                                                                                                                                                                                                                                                                                                                                                                                                                                                                                                                                                                                                                                                                                                                                                                                                                                                                                                                                                                                                                                                                                                                                                                                                                                       |
|--|--|--|--|--|--|---------------------------------------------------------------------------------------------------------------------------------------------------------------------------------------------------------------------------------------------------------------------------------------------------------------------------------------------------------------------------------------------------------------------------------------------------------------------------------------------------------------------------------------------------------------------------------------------------------------------------------------------------------------------------------------------------------------------------------------------------------------------------------------------------------------------------------------------------------------------------------------------------------------------------------------------------------------------------------------------------------------------------------------------------------------------------------------------------------------------------------------------------------------------------------------------------------------------------------------------------------------------------------------------------------------------------------------------------------------------------------------------------------------------------------------------------------------------------------------|
|  |  |  |  |  |  | 40C_A:SPR28:UTP13:CKB2:C5_03010W_A:RMS1:C5_03400C_A:C5_03920C_A:C5_04120C_A:HAS1:C5_04840C_A:C5_04910W_A:GRF10:C5_05340W_A:NOP5:CDC14:T<br>OP1:C6_01040C_A:C6_01120C_A:CIC1:C6_01890C_A:SWD3:C6_02230W_A:ALG11:<br>C6_02290C_A:C6_02350C_A:C6_02430W_A:MRT4:C6_02900C_A:POP4:C6_03210C<br>_A:C6_03380W_A:C6_03390W_A:C6_03440W_A:SPB1:C6_04240W_A:NOP8:C6_04<br>530C_A:C7_00160C_A:C7_00220W_A:C7_00330C_A:THG1:NOP15:C7_01030C_A:D<br>BP7:C7_01210C_A:C7_01270C_A:C7_01360C_A:GIR2:FLU1:C7_01570C_A:C7_01950<br>W_A:LIG1:C7_02340C_A:C7_02460C_A:C7_02660C_A:C7_02930C_A:C7_03400C_A:<br>ISY1:ENP2:C7_03590C_A:ENP1:C7_03850W_A:C7_03880C_A:C7_04150W_A:UTP18<br>:CR_00430C_A:CR_00460C_A:BUD22:PWP2:CR_00830W_A:TRM1:DAL81:CR_01320<br>C_A:CR_01410C_A:CR_01550C_A:CR_01600C_A:CR_01670W_A:CR_01700C_A:CR_<br>01710W_A:CR_01780W_A:CR_02030C_A:MCM6:CR_02420W_A:CR_02550C_A:RRP<br>9:CR_02890C_A:SRP40:SMC5:CR_03200C_A:CR_03230W_A:CR_03360W_A:KTI12:N<br>CS2:YVH1:SMC1:PRP42:CR_03940W_A:CR_04110W_A:CR_04160C_A:CR_04170W_<br>A:CR_04240C_A:CR_04300W_A:CR_04500C_A:CR_04710W_A:NOC2:CR_05550C_A:<br>RNR3:MTG2:DBP8:RFX1:RPL7:CR_06230W_A:FGR50:CR_06450W_A:RRN11:CR_066<br>80C_A:NMD3:CR_06840W_A:CR_06970C_A:POL2:CR_07030C_A:CR_07310W_A:PIF<br>1:FUN30:CR_07640C_A:DBP6:IMP4:CR_08000C_A:NOP10:SSB1:RIO2:ATS1:CR_0833<br>0W_A:CR_08410W_A:TSR1:CR_08940W_A:MPS1:SSF1:CR_09740W_A:MED21:CR_0<br>9800C_A:DPB2:SIK1:UTP5:CR_10260W_A:CR_10410C_A:CR_10470C_A:DRS1:LTV1:<br>POP3 |
|--|--|--|--|--|--|---------------------------------------------------------------------------------------------------------------------------------------------------------------------------------------------------------------------------------------------------------------------------------------------------------------------------------------------------------------------------------------------------------------------------------------------------------------------------------------------------------------------------------------------------------------------------------------------------------------------------------------------------------------------------------------------------------------------------------------------------------------------------------------------------------------------------------------------------------------------------------------------------------------------------------------------------------------------------------------------------------------------------------------------------------------------------------------------------------------------------------------------------------------------------------------------------------------------------------------------------------------------------------------------------------------------------------------------------------------------------------------------------------------------------------------------------------------------------------------|

|       |                     |                              |                                         |           |       |                                                                                                                                                                                                                                                                                                                                                                                                                                                                                                                                                                                                                                                                                                                                                                                                                                                                                                                                                                                                                                                                                                                                                                                                                                                                                                                                                                                                                                                                                                                                                                                                                                                                                                                                                                                                                                                                                                                                                                                                                                                                                                                                                                                                                                                                                                                                                                                                                                                                                                                                                                                                                                                                  |
|-------|---------------------|------------------------------|-----------------------------------------|-----------|-------|------------------------------------------------------------------------------------------------------------------------------------------------------------------------------------------------------------------------------------------------------------------------------------------------------------------------------------------------------------------------------------------------------------------------------------------------------------------------------------------------------------------------------------------------------------------------------------------------------------------------------------------------------------------------------------------------------------------------------------------------------------------------------------------------------------------------------------------------------------------------------------------------------------------------------------------------------------------------------------------------------------------------------------------------------------------------------------------------------------------------------------------------------------------------------------------------------------------------------------------------------------------------------------------------------------------------------------------------------------------------------------------------------------------------------------------------------------------------------------------------------------------------------------------------------------------------------------------------------------------------------------------------------------------------------------------------------------------------------------------------------------------------------------------------------------------------------------------------------------------------------------------------------------------------------------------------------------------------------------------------------------------------------------------------------------------------------------------------------------------------------------------------------------------------------------------------------------------------------------------------------------------------------------------------------------------------------------------------------------------------------------------------------------------------------------------------------------------------------------------------------------------------------------------------------------------------------------------------------------------------------------------------------------------|
| 42254 | ribosome biogenesis | 448 out of 1061 genes, 42.2% | 886 out of 6473 background genes, 13.7% | 6.16E-147 | 0.00% | HBR1:CNS1:RPO41:NRM1:RRS1:TRI1:C1_01160C_A:C1_02090C_A:ABP140:C1_02450C_A:PDE2:C1_02900C_A:TSR2:ARX1:C1_03630W_A:RPP1:C1_03830C_A:C1_04040C_A:C1_04120C_A:ERB1:NOP4:C1_04510W_A:C1_04710C_A:C1_04970W_A:RRP6:REI1:TRY2:C1_05220C_A:C1_05360C_A:C1_05380C_A:RSM22:RPS27A:FAL1:C1_05650W_A:C1_06530C_A:C1_06540C_A:NOP6:C1_06760C_A:RIA1:C1_07510W_A:C1_07660W_A:ERD1:C1_07950C_A:C1_07960W_A:FUN12:MLT1:DIP2:GCR3:GCD6:C1_08630W_A:MSS116:JIP5:C1_09040C_A:CEF1:C1_09390W_A:YTM1:C1_09710C_A:C1_09790C_A:PDC2:DBP3:MNN23:FCY23:C1_10620W_A:RPA190:C1_10920W_A:C1_10950C_A:C1_10970W_A:C1_11000C_A:NEP1:KRR1:GAR1:MUP1:C1_11900C_A:C1_11910W_A:TRP3:C1_12280C_A:CSI2:C1_12350W_A:C1_12440W_A:C1_12570C_A:C1_12630C_A:C1_12680W_A:C1_12750C_A:C1_12760W_A:C1_12820C_A:REX3:RMP1:C1_13370W_A:C1_13380W_A:MCU1:C1_13820C_A:C1_14080W_A:C1_14330W_A:MPP10:FAV3:C2_00200W_A:C2_00280C_A:C2_00410C_A:C2_00820W_A:C2_00840W_A:C2_01070W_A:C2_01220W_A:C2_01420C_A:REX2:C2_01820C_A:C2_01860C_A:C2_02120W_A:C2_02420C_A:UTP21:UTP22:PRS1:C2_02540W_A:C2_02630W_A:PDR17:MET1:PRP3:SCH9:C2_04120C_A:TBF1:SUV3:RIM2:C2_04570W_A:SNU114:C2_04700C_A:C2_04820W_A:PZF1:CKA2:C2_05050C_A:C2_05080C_A:MAK5:C2_05160C_A:RPF2:C2_05670C_A:C2_05750W_A:C2_05830C_A:C2_05840W_A:LAS1:ECM17:MAK16:C2_06520C_A:C2_06530W_A:C2_06660W_A:RPL11:FHL1:C2_06850W_A:NOC4:C2_07360W_A:RCL1:PRS5:C2_07920W_A:NSA1:KRE30:RPS10:C2_08180C_A:EAF3:RRP8:C2_08530C_A:MSU1:UTP15:MFG1:C2_09160W_A:C2_09180W_A:MED18:C2_09310C_A:PES1:TAZ1:RRP15:C2_09660W_A:SMM1:C2_09920W_A:CWC22:PUS7:C2_10740C_A:C2_10810W_A:RPS24:C3_00100W_A:UTP8:BUD21:SOF1:C3_00660W_A:C3_00830C_A:BMS1:ARP9:UTP20:NCE103:C3_01310W_A:RPS7A:C3_01560W_A:C3_02020W_A:C3_02040C_A:UTP4:ILV2:C3_02350W_A:C3_02670W_A:SMC3:C3_02840W_A:C3_02850C_A:C3_03070W_A:C3_03110W_A:C3_03330C_A:HBAR3:C3_04370C_A:C3_04380C_A:MAK21:RPS15:ARV1:SFP1:NOP14:CEM1:C3_05160C_A:RPL8B:C3_05280C_A:C3_05380W_A:C3_05440C_A:QDR2:C3_05800W_A:C3_05860C_A:C3_05900W_A:NOG1:C3_06150W_A:DOT1:ISW2:C3_06370C_A:NSA2:PRP5:NOP13:C3_07550C_A:C3_07570C_A:RAD4:UTP9:C3_07800C_A:DUR4:RLP24:NMD5:C4_00690C_A:C4_00740W_A:C4_00800W_A:C4_00810C_A:C4_00880W_A:RAT1:C4_01280C_A:PWP1:C4_01500W_A:SLX4:HIT1:SAS10:RPC53:HCA4:ZUO1:C4_02880C_A:NAN1:C4_03140C_A:C4_03170W_A:DAO2:C4_03720C_A:C4_03740W_A:NUP84:C4_03830W_A:RRP42:RAM1:ECM1:DUO1:C4_04520W_A:SSZ1:BAS1:C4_04820C_A:AGP3:RPL30:C4_05010W_A:C4_05230C_A:C4_05260W_A:C4_05360C_A:C4_05650W_A:C4_06210C_A:C4_06410W_A:NOP1:C4_06790W_A:C4_06950W_A:C4_07060W_A:C4_07150W_A:MRP17:RMT2:C5_00920W_A:BUD23:CYC3:PUS4:C5_01430C_A:FYV5:SPB4:C5_01930W_A:C5_02010C_A:C5_02070C_A:RIX7:C5_02440C_A:TIF5:S |
|-------|---------------------|------------------------------|-----------------------------------------|-----------|-------|------------------------------------------------------------------------------------------------------------------------------------------------------------------------------------------------------------------------------------------------------------------------------------------------------------------------------------------------------------------------------------------------------------------------------------------------------------------------------------------------------------------------------------------------------------------------------------------------------------------------------------------------------------------------------------------------------------------------------------------------------------------------------------------------------------------------------------------------------------------------------------------------------------------------------------------------------------------------------------------------------------------------------------------------------------------------------------------------------------------------------------------------------------------------------------------------------------------------------------------------------------------------------------------------------------------------------------------------------------------------------------------------------------------------------------------------------------------------------------------------------------------------------------------------------------------------------------------------------------------------------------------------------------------------------------------------------------------------------------------------------------------------------------------------------------------------------------------------------------------------------------------------------------------------------------------------------------------------------------------------------------------------------------------------------------------------------------------------------------------------------------------------------------------------------------------------------------------------------------------------------------------------------------------------------------------------------------------------------------------------------------------------------------------------------------------------------------------------------------------------------------------------------------------------------------------------------------------------------------------------------------------------------------------|

|  |  |  |  |  |  |                                                                                                                                                                                                                                                                                                                                                                                                                                                                                                                                                                                                                                                                                                                                                                                                                                                                                                                                                                                                                                                                                                                                                                                                                                                                                                                                                                                                                                                                    |
|--|--|--|--|--|--|--------------------------------------------------------------------------------------------------------------------------------------------------------------------------------------------------------------------------------------------------------------------------------------------------------------------------------------------------------------------------------------------------------------------------------------------------------------------------------------------------------------------------------------------------------------------------------------------------------------------------------------------------------------------------------------------------------------------------------------------------------------------------------------------------------------------------------------------------------------------------------------------------------------------------------------------------------------------------------------------------------------------------------------------------------------------------------------------------------------------------------------------------------------------------------------------------------------------------------------------------------------------------------------------------------------------------------------------------------------------------------------------------------------------------------------------------------------------|
|  |  |  |  |  |  | PR28:UTP13:BUR2:CKB2:C5_03010W_A:RMS1:C5_03400C_A:C5_03920C_A:C5_04120C_A:C5_04720C_A:HAS1:C5_04840C_A:C5_04910W_A:GRF10:C5_05340W_A:NO<br>P5:CDC14:TOP1:C6_01040C_A:C6_01120C_A:CIC1:C6_01890C_A:SWD3:C6_02230<br>W_A:RPL10A:ALG11:C6_02290C_A:C6_02430W_A:MRT4:C6_02900C_A:POP4:C6_0<br>3210C_A:C6_03380W_A:C6_03390W_A:C6_03440W_A:NOG2:SPB1:C6_04240W_A:<br>NOP8:C7_00160C_A:C7_00220W_A:C7_00330C_A:THG1:RPA135:NOP15:C7_01030<br>C_A:DBP7:C7_01210C_A:C7_01270C_A:C7_01360C_A:GIR2:FLU1:C7_01570C_A:C7_<br>01950W_A:LIG1:C7_02460C_A:C7_02660C_A:C7_02930C_A:C7_03400C_A:ISY1:EN<br>P2:C7_03590C_A:ENP1:C7_03850W_A:C7_03880C_A:C7_04150W_A:UTP18:CR_00<br>430C_A:CR_00460C_A:BUD22:PWP2:CR_00830W_A:DAL81:CR_01320C_A:CR_0141<br>0C_A:CR_01550C_A:CR_01600C_A:CR_01670W_A:CR_01700C_A:CR_01710W_A:CR_<br>01780W_A:CR_02030C_A:MCM6:CR_02420W_A:CR_02550C_A:RRP9:CR_02890C_<br>A:SRP40:SMC5:CR_03200C_A:CR_03230W_A:CR_03360W_A:KTI12:NCS2:YVH1:SGD<br>1:SMC1:PRP42:CR_03940W_A:MEX67:CR_04110W_A:CR_04170W_A:CR_04240C_A<br>:CR_04500C_A:CR_04710W_A:NOC2:CR_05550C_A:RNR3:MTG2:DBP8:SDA1:RFX1:R<br>PL7:CR_06230W_A:FGR50:CR_06450W_A:RRN11:CR_06680C_A:NMD3:CR_06840W<br>_A:CR_06970C_A:POL2:CR_07030C_A:CR_07310W_A:PIF1:FUN30:CR_07640C_A:DB<br>P6:IMP4:CR_08000C_A:NOP10:SSB1:RIO2:ATS1:CR_08330W_A:CR_08410W_A:TSR<br>1:CR_08500W_A:MPS1:ELF1:SSF1:CR_09740W_A:MED21:CR_09800C_A:DPB2:SIK1:<br>UTP5:CR_10260W_A:CR_10410C_A:CR_10470C_A:DRS1:LTV1:POP3 |
|--|--|--|--|--|--|--------------------------------------------------------------------------------------------------------------------------------------------------------------------------------------------------------------------------------------------------------------------------------------------------------------------------------------------------------------------------------------------------------------------------------------------------------------------------------------------------------------------------------------------------------------------------------------------------------------------------------------------------------------------------------------------------------------------------------------------------------------------------------------------------------------------------------------------------------------------------------------------------------------------------------------------------------------------------------------------------------------------------------------------------------------------------------------------------------------------------------------------------------------------------------------------------------------------------------------------------------------------------------------------------------------------------------------------------------------------------------------------------------------------------------------------------------------------|

|       |                                      |                              |                                         |           |       |                                                                                                                                                                                                                                                                                                                                                                                                                                                                                                                                                                                                                                                                                                                                                                                                                                                                                                                                                                                                                                                                                                                                                                                                                                                                                                                                                                                                                                                                                                                                                                                                                                                                                                                                                                                                                                                                                                                                                                                                                                                                                                                                                                                                                                                                                                                                                                                                                                                                                                                                                                                                                                                                     |
|-------|--------------------------------------|------------------------------|-----------------------------------------|-----------|-------|---------------------------------------------------------------------------------------------------------------------------------------------------------------------------------------------------------------------------------------------------------------------------------------------------------------------------------------------------------------------------------------------------------------------------------------------------------------------------------------------------------------------------------------------------------------------------------------------------------------------------------------------------------------------------------------------------------------------------------------------------------------------------------------------------------------------------------------------------------------------------------------------------------------------------------------------------------------------------------------------------------------------------------------------------------------------------------------------------------------------------------------------------------------------------------------------------------------------------------------------------------------------------------------------------------------------------------------------------------------------------------------------------------------------------------------------------------------------------------------------------------------------------------------------------------------------------------------------------------------------------------------------------------------------------------------------------------------------------------------------------------------------------------------------------------------------------------------------------------------------------------------------------------------------------------------------------------------------------------------------------------------------------------------------------------------------------------------------------------------------------------------------------------------------------------------------------------------------------------------------------------------------------------------------------------------------------------------------------------------------------------------------------------------------------------------------------------------------------------------------------------------------------------------------------------------------------------------------------------------------------------------------------------------------|
| 22613 | ribonucleoprotein complex biogenesis | 453 out of 1061 genes, 42.7% | 915 out of 6473 background genes, 14.1% | 3.24E-144 | 0.00% | HBR1:CNS1:RPO41:NRM1:RRS1:TRI1:C1_01160C_A:C1_02090C_A:ABP140:C1_02450C_A:PDE2:C1_02900C_A:TSR2:ARX1:C1_03630W_A:RPP1:C1_03830C_A:C1_04040C_A:C1_04120C_A:ERB1:NOP4:C1_04510W_A:C1_04710C_A:C1_04970W_A:RRP6:REI1:TRY2:C1_05220C_A:C1_05360C_A:C1_05380C_A:RSM22:RPS27A:FAL1:C1_05650W_A:C1_06530C_A:C1_06540C_A:NOP6:C1_06760C_A:RIA1:C1_07510W_A:C1_07660W_A:ERD1:C1_07950C_A:C1_07960W_A:FUN12:MLT1:DIP2:GCR3:GCD6:C1_08630W_A:MSS116:JIP5:C1_09040C_A:CEF1:C1_09390W_A:YTM1:C1_09710C_A:C1_09790C_A:PDC2:DBP3:MNN23:FCY23:C1_10620W_A:RPA190:C1_10920W_A:C1_10950C_A:C1_10970W_A:C1_11000C_A:NEP1:KRR1:GAR1:MUP1:C1_11900C_A:C1_11910W_A:TRP3:C1_12280C_A:CSI2:C1_12350W_A:C1_12440W_A:C1_12570C_A:C1_12630C_A:C1_12680W_A:C1_12750C_A:C1_12760W_A:C1_12820C_A:REX3:RMP1:C1_13370W_A:C1_13380W_A:MCU1:C1_13820C_A:C1_14080W_A:C1_14330W_A:MPP10:FAV3:C2_00200W_A:C2_00280C_A:C2_00410C_A:C2_00820W_A:C2_00840W_A:C2_01070W_A:C2_01220W_A:C2_01420C_A:REX2:C2_01820C_A:PRP39:C2_01860C_A:C2_02120W_A:C2_02420C_A:UTP21:UTP22:PRS1:C2_02540W_A:C2_02630W_A:PDR17:MET1:PRP3:SCH9:C2_04120C_A:TBF1:SUV3:RIM2:C2_04570W_A:SNU114:C2_04700C_A:C2_04820W_A:PZF1:CKA2:C2_05050C_A:C2_05080C_A:MAK5:C2_05160C_A:RPF2:C2_05670C_A:C2_05750W_A:C2_05830C_A:C2_05840W_A:LAS1:ECM17:MAK16:C2_06520C_A:C2_06530W_A:C2_06650C_A:C2_06660W_A:RPL11:FHL1:C2_06850W_A:NOC4:C2_07360W_A:RCL1:PRS5:C2_07920W_A:NSA1:KRE30:RPS10:C2_08180C_A:EAF3:RRP8:C2_08530C_A:MSU1:UTP15:MFG1:C2_09160W_A:C2_09180W_A:MED18:C2_09310C_A:PES1:TAZ1:RRP15:C2_09660W_A:SMM1:C2_09920W_A:CWC22:PUS7:C2_10740C_A:C2_10810W_A:RPS24:C3_00100W_A:UTP8:BUD21:SOF1:C3_00660W_A:C3_00830C_A:BMS1:ARP9:UTP20:NCE103:C3_01310W_A:RPS7A:C3_01560W_A:C3_02020W_A:C3_02040C_A:UTP4:ILV2:C3_02350W_A:C3_02670W_A:SMC3:C3_02840W_A:C3_02850C_A:C3_03070W_A:C3_03110W_A:C3_03330C_A:HBR3:C3_04370C_A:C3_04380C_A:MAK21:RPS15:ARV1:SFP1:NOP14:CEM1:C3_05160C_A:RPL8B:C3_05280C_A:C3_05380W_A:C3_05440C_A:QDR2:C3_05800W_A:C3_05860C_A:C3_05900W_A:NOG1:C3_06150W_A:DOT1:ISW2:C3_06370C_A:NSA2:PRP5:NOP13:C3_07550C_A:C3_07570C_A:RAD4:UTP9:C3_07800C_A:DUR4:RLP24:NMD5:C4_00690C_A:C4_00740W_A:C4_00800W_A:C4_00810C_A:C4_00880W_A:RAT1:C4_01280C_A:PWP1:C4_01500W_A:SLX4:HIT1:SAS10:RPC53:HCA4:ZUO1:C4_02880C_A:NAN1:C4_03140C_A:C4_03170W_A:DAO2:C4_03720C_A:C4_03740W_A:NUP84:C4_03830W_A:RRP42:RAM1:ECM1:DUO1:C4_04520W_A:SSZ1:BAS1:C4_04820C_A:AGP3:RPL30:C4_05010W_A:C4_05230C_A:C4_05260W_A:C4_05360C_A:C4_05650W_A:C4_06210C_A:C4_06410W_A:NOP1:C4_06790W_A:C4_06950W_A:C4_07060W_A:C4_07150W_A:MRP17:RMT2:C5_00920W_A:BUD23:CYC3:PUS4:C5_01430C_A:FYV5:SPB4:C5_01930W_A:C5_02010C_A:C5_02070C_A:RIX7:C5_0 |
|-------|--------------------------------------|------------------------------|-----------------------------------------|-----------|-------|---------------------------------------------------------------------------------------------------------------------------------------------------------------------------------------------------------------------------------------------------------------------------------------------------------------------------------------------------------------------------------------------------------------------------------------------------------------------------------------------------------------------------------------------------------------------------------------------------------------------------------------------------------------------------------------------------------------------------------------------------------------------------------------------------------------------------------------------------------------------------------------------------------------------------------------------------------------------------------------------------------------------------------------------------------------------------------------------------------------------------------------------------------------------------------------------------------------------------------------------------------------------------------------------------------------------------------------------------------------------------------------------------------------------------------------------------------------------------------------------------------------------------------------------------------------------------------------------------------------------------------------------------------------------------------------------------------------------------------------------------------------------------------------------------------------------------------------------------------------------------------------------------------------------------------------------------------------------------------------------------------------------------------------------------------------------------------------------------------------------------------------------------------------------------------------------------------------------------------------------------------------------------------------------------------------------------------------------------------------------------------------------------------------------------------------------------------------------------------------------------------------------------------------------------------------------------------------------------------------------------------------------------------------------|

|  |  |  |  |  |  |                                                                                                                                                                                                                                                                                                                                                                                                                                                                                                                                                                                                                                                                                                                                                                                                                                                                                                                                                                                                                                                                                                                                                                                                                                                                                                                                                                                                                          |
|--|--|--|--|--|--|--------------------------------------------------------------------------------------------------------------------------------------------------------------------------------------------------------------------------------------------------------------------------------------------------------------------------------------------------------------------------------------------------------------------------------------------------------------------------------------------------------------------------------------------------------------------------------------------------------------------------------------------------------------------------------------------------------------------------------------------------------------------------------------------------------------------------------------------------------------------------------------------------------------------------------------------------------------------------------------------------------------------------------------------------------------------------------------------------------------------------------------------------------------------------------------------------------------------------------------------------------------------------------------------------------------------------------------------------------------------------------------------------------------------------|
|  |  |  |  |  |  | 2440C_A:TIF5:SPR28:UTP13:BUR2:CKB2:C5_03010W_A:RMS1:C5_03400C_A:C5_03920C_A:C5_04120C_A:C5_04720C_A:HAS1:C5_04840C_A:C5_04910W_A:GRF10:C5_05340W_A:NOP5:CDC14:TOP1:C6_01040C_A:C6_01120C_A:CIC1:TIF3:C6_01890C_A:SWD3:C6_02230W_A:RPL10A:ALG11:C6_02290C_A:C6_02430W_A:PRP45:MRT4:C6_02900C_A:POP4:C6_03210C_A:C6_03380W_A:C6_03390W_A:C6_03440W_A:NOG2:SPB1:C6_04240W_A:NOP8:C7_00160C_A:C7_00220W_A:C7_00330C_A:THG1:RPA135:NOP15:C7_01030C_A:DBP7:C7_01210C_A:C7_01270C_A:C7_01360C_A:GIR2:FLU1:C7_01570C_A:C7_01950W_A:LIG1:C7_02460C_A:C7_02660C_A:C7_02930C_A:C7_03400C_A:ISY1:ENP2:C7_03590C_A:ENP1:C7_03850W_A:C7_03880C_A:C7_04150W_A:UTP18:CR_00430C_A:CR_00460C_A:BUD22:PWP2:CR_00830W_A:DAL81:CR_01320C_A:CR_01410C_A:CR_01550C_A:CR_01600C_A:CR_01670W_A:CR_01700C_A:CR_01710W_A:CR_01780W_A:CR_02030C_A:MCM6:CR_02420W_A:CR_02550C_A:RRP9:CR_02890C_A:SRP40:ARC1:SMC5:CR_03200C_A:CR_03230W_A:CR_03360W_A:KTI12:NCS2:YVH1:SGD1:SMC1:PRP42:CR_03940W_A:MEX67:CR_04110W_A:CR_04170W_A:CR_04240C_A:CR_04500C_A:CR_04710W_A:NOC2:CR_05550C_A:RNR3:MTG2:DBP8:SDA1:RFX1:RPL7:CR_06230W_A:FGR50:CR_06450W_A:RRN11:CR_06680C_A:NMD3:CR_06840W_A:CR_06970C_A:POL2:CR_07030C_A:CR_07310W_A:PIF1:FUN30:CR_07640C_A:DBP6:IMP4:CR_08000C_A:NOP10:SSB1:RIO2:ATS1:CR_08330W_A:CR_08410W_A:TSR1:CR_08500W_A:MPS1:ELF1:SSF1:CR_09740W_A:MED21:CR_09800C_A:DPB2:SIK1:UTP5:CR_10260W_A:CR_10410C_A:CR_10470C_A:DRS1:LTV1:POP3 |
|--|--|--|--|--|--|--------------------------------------------------------------------------------------------------------------------------------------------------------------------------------------------------------------------------------------------------------------------------------------------------------------------------------------------------------------------------------------------------------------------------------------------------------------------------------------------------------------------------------------------------------------------------------------------------------------------------------------------------------------------------------------------------------------------------------------------------------------------------------------------------------------------------------------------------------------------------------------------------------------------------------------------------------------------------------------------------------------------------------------------------------------------------------------------------------------------------------------------------------------------------------------------------------------------------------------------------------------------------------------------------------------------------------------------------------------------------------------------------------------------------|



|      |                |                              |                                         |           |       |                                                                                                                                                                                                                                                                                                                                                                                                                                                                                                                                                                                                                                                                                                                                                                                                                                                                                                                                                                                                                                                                                                                                                                                                                                                                                                                                                                                                                                                                                                                                                                                                                                                                                                                                                                                                                                                                                                                                                                                                                                                                                                                                                                                                                                                                                                                                                                                                                                                                                                                                                                                                                                                             |
|------|----------------|------------------------------|-----------------------------------------|-----------|-------|-------------------------------------------------------------------------------------------------------------------------------------------------------------------------------------------------------------------------------------------------------------------------------------------------------------------------------------------------------------------------------------------------------------------------------------------------------------------------------------------------------------------------------------------------------------------------------------------------------------------------------------------------------------------------------------------------------------------------------------------------------------------------------------------------------------------------------------------------------------------------------------------------------------------------------------------------------------------------------------------------------------------------------------------------------------------------------------------------------------------------------------------------------------------------------------------------------------------------------------------------------------------------------------------------------------------------------------------------------------------------------------------------------------------------------------------------------------------------------------------------------------------------------------------------------------------------------------------------------------------------------------------------------------------------------------------------------------------------------------------------------------------------------------------------------------------------------------------------------------------------------------------------------------------------------------------------------------------------------------------------------------------------------------------------------------------------------------------------------------------------------------------------------------------------------------------------------------------------------------------------------------------------------------------------------------------------------------------------------------------------------------------------------------------------------------------------------------------------------------------------------------------------------------------------------------------------------------------------------------------------------------------------------------|
| 6396 | RNA processing | 456 out of 1061 genes, 43.0% | 931 out of 6473 background genes, 14.4% | 5.28E-143 | 0.00% | HBR1:CNS1:RPO41:NRM1:RRS1:TRI1:C1_01150C_A:C1_01160C_A:TRM2:C1_02090C_A:ABP140:C1_02450C_A:PDE2:C1_02900C_A:TSR2:C1_03370W_A:C1_03630W_A:RPP1:C1_03830C_A:C1_04040C_A:C1_04120C_A:ERB1:NOP4:C1_04510W_A:C1_04530C_A:C1_04710C_A:C1_04970W_A:RRP6:REI1:TRY2:C1_05220C_A:C1_05360C_A:C1_05380C_A:RSM22:RPS27A:FAL1:C1_05650W_A:C1_06540C_A:NOP6:C1_06760C_A:RIA1:LHP1:C1_07510W_A:C1_07660W_A:MRPL3:ERD1:C1_07950C_A:C1_07960W_A:FUN12:MLT1:DIP2:GCR3:GCD6:C1_08630W_A:MSS116:C1_08890C_A:CEF1:C1_09390W_A:C1_09710C_A:C1_09790C_A:BUD31:PDC2:DBP3:MNN23:C1_10080W_A:FCY23:C1_10620W_A:C1_10950C_A:C1_10970W_A:C1_11000C_A:PET127:NEP1:KRR1:MUP1:C1_11900C_A:C1_11910W_A:TRP3:C1_12280C_A:CSI2:C1_12350W_A:C1_12440W_A:C1_12570C_A:C1_12630C_A:C1_12670C_A:C1_12750C_A:C1_12760W_A:C1_12820C_A:REX3:RMP1:C1_13380W_A:MCU1:C1_13820C_A:C1_14080W_A:C1_14330W_A:MPP10:FAV3:C2_00200W_A:C2_00280C_A:C2_00410C_A:C2_00820W_A:C2_00840W_A:C2_01070W_A:C2_01220W_A:C2_01420C_A:REX2:C2_01820C_A:PRP39:C2_01860C_A:C2_02120W_A:C2_02420C_A:UTP21:UTP22:PRS1:C2_02540W_A:C2_02630W_A:PDR17:MET1:PRP3:SCH9:C2_04120C_A:TBF1:SUV3:RIM2:C2_04570W_A:SNU114:C2_04700C_A:C2_04820W_A:PZF1:CKA2:C2_05050C_A:C2_05080C_A:MAK5:C2_05160C_A:RPF2:KTI11:C2_05670C_A:C2_05750W_A:C2_05830C_A:C2_05840W_A:LAS1:ECM17:MAK16:C2_06480W_A:C2_06520C_A:C2_06530W_A:C2_06650C_A:C2_06660W_A:FHL1:C2_06850W_A:NOC4:C2_07360W_A:RCL1:PRS5:C2_07920W_A:NSA1:C2_08180C_A:EAF3:RRP8:C2_08530C_A:MSU1:UTP15:C2_09160W_A:C2_09180W_A:C2_09310C_A:PES1:TAZ1:RRP15:C2_09500W_A:C2_09660W_A:SMM1:C2_09920W_A:CWC22:UBP8:PUS7:C2_10740C_A:C2_10810W_A:RPS24:C3_00100W_A:UTP8:BUD21:SOF1:C3_00660W_A:C3_00830C_A:BMS1:ARP9:UTP20:NCE103:C3_01310W_A:C3_01560W_A:C3_02020W_A:C3_02040C_A:UTP4:ILV2:C3_02350W_A:C3_02670W_A:C3_02750W_A:C3_02840W_A:C3_02850C_A:C3_03070W_A:C3_03110W_A:C3_03330C_A:HBR3:C3_04370C_A:C3_04380C_A:MAK21:ARV1:SFP1:NOP14:CEM1:C3_05140C_A:C3_05160C_A:RPL8B:C3_05280C_A:C3_05380W_A:C3_05440C_A:QDR2:C3_05800W_A:C3_05860C_A:TRM12:C3_05900W_A:NOG1:C3_06150W_A:DOT1:ISW2:C3_06370C_A:NSA2:PRP5:NOP13:C3_07400W_A:C3_07550C_A:C3_07570C_A:RIT1:RAD4:UTP9:C3_07800C_A:DUR4:RPL24:NMD5:C4_00690C_A:C4_00740W_A:C4_00800W_A:C4_00810C_A:C4_00880W_A:C4_00940W_A:RAT1:C4_01280C_A:PWP1:C4_01500W_A:SLX4:HIT1:SAS10:RPC53:HCA4:C4_02850W_A:ZUO1:C4_02880C_A:NAN1:C4_03140C_A:C4_03170W_A:DAO2:C4_03720C_A:C4_03730C_A:C4_03740W_A:NUP84:C4_03830W_A:RRP42:RAM1:ECM1:DUO1:C4_04520W_A:SSZ1:BAS1:C4_04810C_A:AGP3:RPL30:C4_05230C_A:C4_05260W_A:C4_05360C_A:C4_05650W_A:C4_06210C_A:C4_06410W_A:NOP1:C4_06790W_A:C4_06950W_A:C4_07060W_A:C4_07150W_A:DUS4:MRP17:RMT2:C5_00920 |
|------|----------------|------------------------------|-----------------------------------------|-----------|-------|-------------------------------------------------------------------------------------------------------------------------------------------------------------------------------------------------------------------------------------------------------------------------------------------------------------------------------------------------------------------------------------------------------------------------------------------------------------------------------------------------------------------------------------------------------------------------------------------------------------------------------------------------------------------------------------------------------------------------------------------------------------------------------------------------------------------------------------------------------------------------------------------------------------------------------------------------------------------------------------------------------------------------------------------------------------------------------------------------------------------------------------------------------------------------------------------------------------------------------------------------------------------------------------------------------------------------------------------------------------------------------------------------------------------------------------------------------------------------------------------------------------------------------------------------------------------------------------------------------------------------------------------------------------------------------------------------------------------------------------------------------------------------------------------------------------------------------------------------------------------------------------------------------------------------------------------------------------------------------------------------------------------------------------------------------------------------------------------------------------------------------------------------------------------------------------------------------------------------------------------------------------------------------------------------------------------------------------------------------------------------------------------------------------------------------------------------------------------------------------------------------------------------------------------------------------------------------------------------------------------------------------------------------------|

|  |  |  |  |  |  |                                                                                                                                                                                                                                                                                                                                                                                                                                                                                                                                                                                                                                                                                                                                                                                                                                                                                                                                                                                                                                                                                                                                                                                                                                                                                                                                                                                                                                                                                                                                                   |
|--|--|--|--|--|--|---------------------------------------------------------------------------------------------------------------------------------------------------------------------------------------------------------------------------------------------------------------------------------------------------------------------------------------------------------------------------------------------------------------------------------------------------------------------------------------------------------------------------------------------------------------------------------------------------------------------------------------------------------------------------------------------------------------------------------------------------------------------------------------------------------------------------------------------------------------------------------------------------------------------------------------------------------------------------------------------------------------------------------------------------------------------------------------------------------------------------------------------------------------------------------------------------------------------------------------------------------------------------------------------------------------------------------------------------------------------------------------------------------------------------------------------------------------------------------------------------------------------------------------------------|
|  |  |  |  |  |  | W_A:BUD23:CYC3:PUS4:C5_01430C_A:FYV5:SPB4:C5_01610W_A:C5_01930W_A:C5_02010C_A:C5_02070C_A:RIX7:C5_02440C_A:SPR28:UTP13:CKB2:C5_03010W_A:RMS1:C5_03400C_A:C5_03920C_A:C5_04120C_A:HAS1:C5_04840C_A:C5_04910W_A:GRF10:C5_05340W_A:NOP5:C6_00530C_A:CDC14:TOP1:C6_01040C_A:C6_01120C_A:CIC1:C6_01890C_A:SWD3:C6_02230W_A:ALG11:C6_02290C_A:C6_02350C_A:C6_02430W_A:PRP45:C6_02690C_A:MRT4:C6_02900C_A:POP4:C6_03210C_A:C6_03380W_A:C6_03390W_A:C6_03440W_A:NAM2:SPB1:C6_04240W_A:NOP8:C6_04530C_A:C7_00160C_A:C7_00220W_A:C7_00330C_A:THG1:NOP15:C7_01030C_A:DBP7:C7_01210C_A:C7_01270C_A:C7_01360C_A:GIR2:FLU1:C7_01570C_A:C7_01950W_A:LIG1:C7_02340C_A:C7_02460C_A:C7_02660C_A:C7_02930C_A:C7_03400C_A:ISY1:ENP2:C7_03590C_A:ENP1:C7_03850W_A:C7_03880C_A:C7_04150W_A:UTP18:CR_00430C_A:CR_00460C_A:BUD22:PWP2:CR_00830W_A:TRM1:DAL81:CR_01320C_A:CR_01410C_A:CR_01550C_A:CR_01600C_A:CR_01670W_A:CR_01700C_A:CR_01710W_A:CR_01780W_A:CR_02030C_A:MCM6:CR_02420W_A:CR_02550C_A:RRP9:CR_02890C_A:SRP40:SMC5:CR_03200C_A:CR_03230W_A:CR_03360W_A:KTI12:NCS2:YVH1:SMC1:PRP42:CR_03940W_A:CR_04110W_A:CR_04160C_A:CR_04170W_A:CR_04240C_A:CR_04300W_A:CR_04500C_A:CR_04710W_A:NOC2:CR_05550C_A:RNR3:MTG2:DBP8:RFX1:RPL7:CR_06230W_A:FGR50:CR_06450W_A:RRN11:CR_06680C_A:NMD3:CR_06840W_A:CR_06970C_A:POL2:CR_07030C_A:CR_07310W_A:PIF1:FUN30:CR_07640C_A:DBP6:IMP4:CR_08000C_A:NOP10:SSB1:RIO2:ATS1:CR_08330W_A:CR_08410W_A:TSR1:CR_08940W_A:MPS1:SSF1:CR_09740W_A:MED21:CR_09800C_A:DPB2:SIK1:UTP5:CR_10260W_A:CR_10410C_A:CR_10470C_A:DRS1:LTV1:POP3 |
|--|--|--|--|--|--|---------------------------------------------------------------------------------------------------------------------------------------------------------------------------------------------------------------------------------------------------------------------------------------------------------------------------------------------------------------------------------------------------------------------------------------------------------------------------------------------------------------------------------------------------------------------------------------------------------------------------------------------------------------------------------------------------------------------------------------------------------------------------------------------------------------------------------------------------------------------------------------------------------------------------------------------------------------------------------------------------------------------------------------------------------------------------------------------------------------------------------------------------------------------------------------------------------------------------------------------------------------------------------------------------------------------------------------------------------------------------------------------------------------------------------------------------------------------------------------------------------------------------------------------------|

|      |                 |                              |                                         |           |       |                                                                                                                                                                                                                                                                                                                                                                                                                                                                                                                                                                                                                                                                                                                                                                                                                                                                                                                                                                                                                                                                                                                                                                                                                                                                                                                                                                                                                                                                                                                                                                                                                                                                                                                                                                                                                                                                                                                                                                                                                                                                                                                                                                                                                                                                                                                                                                                                                                                                                                                                                                                                                                                                   |
|------|-----------------|------------------------------|-----------------------------------------|-----------|-------|-------------------------------------------------------------------------------------------------------------------------------------------------------------------------------------------------------------------------------------------------------------------------------------------------------------------------------------------------------------------------------------------------------------------------------------------------------------------------------------------------------------------------------------------------------------------------------------------------------------------------------------------------------------------------------------------------------------------------------------------------------------------------------------------------------------------------------------------------------------------------------------------------------------------------------------------------------------------------------------------------------------------------------------------------------------------------------------------------------------------------------------------------------------------------------------------------------------------------------------------------------------------------------------------------------------------------------------------------------------------------------------------------------------------------------------------------------------------------------------------------------------------------------------------------------------------------------------------------------------------------------------------------------------------------------------------------------------------------------------------------------------------------------------------------------------------------------------------------------------------------------------------------------------------------------------------------------------------------------------------------------------------------------------------------------------------------------------------------------------------------------------------------------------------------------------------------------------------------------------------------------------------------------------------------------------------------------------------------------------------------------------------------------------------------------------------------------------------------------------------------------------------------------------------------------------------------------------------------------------------------------------------------------------------|
| 6364 | rRNA processing | 417 out of 1061 genes, 39.3% | 806 out of 6473 background genes, 12.5% | 3.66E-139 | 0.00% | HBR1:CNS1:RPO41:NRM1:RRS1:TRI1:C1_01160C_A:C1_02090C_A:ABP140:C1_02450C_A:PDE2:C1_02900C_A:TSR2:C1_03630W_A:RPP1:C1_03830C_A:C1_04040C_A:C1_04120C_A:ERB1:NOP4:C1_04510W_A:C1_04710C_A:C1_04970W_A:RRP6:REI1:TRY2:C1_05220C_A:C1_05360C_A:C1_05380C_A:RSM22:RPS27A:FAL1:C1_05650W_A:C1_06540C_A:NOP6:C1_06760C_A:RIA1:C1_07510W_A:C1_07660W_A:ERD1:C1_07950C_A:C1_07960W_A:FUN12:MLT1:DIP2:GCR3:GCD6:C1_08630W_A:MSS116:CEF1:C1_09390W_A:C1_09710C_A:C1_09790C_A:PDC2:DBP3:MNN23:FCY23:C1_10620W_A:C1_10950C_A:C1_10970W_A:C1_11000C_A:NEP1:KRR1:MUP1:C1_11900C_A:C1_11910W_A:TRP3:C1_12280C_A:CSI2:C1_12350W_A:C1_12440W_A:C1_12570C_A:C1_12630C_A:C1_12750C_A:C1_12760W_A:C1_12820C_A:REX3:RMP1:C1_13380W_A:MCU1:C1_13820C_A:C1_14080W_A:C1_14330W_A:MPP10:FAV3:C2_00200W_A:C2_00280C_A:C2_00410C_A:C2_00820W_A:C2_00840W_A:C2_01070W_A:C2_01220W_A:C2_01420C_A:REX2:C2_01820C_A:C2_01860C_A:C2_02120W_A:C2_02420C_A:UTP21:UTP22:PRS1:C2_02540W_A:C2_02630W_A:PDR17:MET1:PRP3:SCH9:C2_04120C_A:TBF1:SUV3:RIM2:C2_04570W_A:SNU114:C2_04700C_A:C2_04820W_A:PZF1:CKA2:C2_05050C_A:C2_05080C_A:MAK5:C2_05160C_A:RPF2:C2_05670C_A:C2_05750W_A:C2_05830C_A:C2_05840W_A:LAS1:ECM17:MAK16:C2_06520C_A:C2_06530W_A:C2_06660W_A:FHL1:C2_06850W_A:NOC4:C2_07360W_A:RCL1:PRS5:C2_07920W_A:NSA1:C2_08180C_A:EAF3:RRP8:C2_08530C_A:MSU1:UTP15:C2_09160W_A:C2_09180W_A:C2_09310C_A:PES1:TAZ1:RRP15:C2_09660W_A:SMM1:C2_09920W_A:CWC22:PUS7:C2_10740C_A:C2_10810W_A:RPS24:C3_00100W_A:UTP8:BUD21:SOF1:C3_00660W_A:C3_00830C_A:BMS1:ARP9:UTP20:NCE103:C3_01310W_A:C3_01560W_A:C3_02020W_A:C3_02040C_A:UTP4:ILV2:C3_02350W_A:C3_02670W_A:C3_02840W_A:C3_02850C_A:C3_03070W_A:C3_03110W_A:C3_03330C_A:HBR3:C3_04370C_A:C3_04380C_A:MAK21:ARV1:SFP1:NOP14:CEM1:C3_05160C_A:RPL8B:C3_05280C_A:C3_05380W_A:C3_05440C_A:QDR2:C3_05800W_A:C3_05860C_A:C3_05900W_A:NOG1:C3_06150W_A:DOT1:ISW2:C3_06370C_A:NSA2:PRP5:NOP13:C3_07550C_A:C3_07570C_A:RAD4:UTP9:C3_07800C_A:DUR4:RLP24:NMD5:C4_00690C_A:C4_00740W_A:C4_00800W_A:C4_00810C_A:C4_00880W_A:RAT1:C4_01280C_A:PWP1:C4_01500W_A:SLX4:HIT1:SAS10:RPC53:HCA4:ZUO1:C4_02880C_A:NAN1:C4_03140C_A:C4_03170W_A:DAO2:C4_03720C_A:C4_03740W_A:NUP84:C4_03830W_A:RRP42:RAM1:ECM1:DUO1:C4_04520W_A:SSZ1:BAS1:AGP3:RPL30:C4_05230C_A:C4_05260W_A:C4_05360C_A:C4_05650W_A:C4_06210C_A:C4_06410W_A:NOP1:C4_06790W_A:C4_06950W_A:C4_07060W_A:C4_07150W_A:MRP17:RMT2:C5_00920W_A:BUD23:CYC3:PUS4:C5_01430C_A:FYV5:SPB4:C5_01930W_A:C5_02010C_A:C5_02070C_A:RIX7:C5_02440C_A:SPR28:UTP13:CKB2:C5_03010W_A:RMS1:C5_03400C_A:C5_03920C_A:C5_04120C_A:HAS1:C5_04840C_A:C5_04910W_A:GRF10:C5_05340W_A:NOP5:CDC14:TOP1:C6_01040C_A:C6_01120C_A:CIC1:C6_ |
|------|-----------------|------------------------------|-----------------------------------------|-----------|-------|-------------------------------------------------------------------------------------------------------------------------------------------------------------------------------------------------------------------------------------------------------------------------------------------------------------------------------------------------------------------------------------------------------------------------------------------------------------------------------------------------------------------------------------------------------------------------------------------------------------------------------------------------------------------------------------------------------------------------------------------------------------------------------------------------------------------------------------------------------------------------------------------------------------------------------------------------------------------------------------------------------------------------------------------------------------------------------------------------------------------------------------------------------------------------------------------------------------------------------------------------------------------------------------------------------------------------------------------------------------------------------------------------------------------------------------------------------------------------------------------------------------------------------------------------------------------------------------------------------------------------------------------------------------------------------------------------------------------------------------------------------------------------------------------------------------------------------------------------------------------------------------------------------------------------------------------------------------------------------------------------------------------------------------------------------------------------------------------------------------------------------------------------------------------------------------------------------------------------------------------------------------------------------------------------------------------------------------------------------------------------------------------------------------------------------------------------------------------------------------------------------------------------------------------------------------------------------------------------------------------------------------------------------------------|

|  |  |  |  |  |  |                                                                                                                                                                                                                                                                                                                                                                                                                                                                                                                                                                                                                                                                                                                                                                                                                                                                                                                                                                                                                                                                                                                                                   |
|--|--|--|--|--|--|---------------------------------------------------------------------------------------------------------------------------------------------------------------------------------------------------------------------------------------------------------------------------------------------------------------------------------------------------------------------------------------------------------------------------------------------------------------------------------------------------------------------------------------------------------------------------------------------------------------------------------------------------------------------------------------------------------------------------------------------------------------------------------------------------------------------------------------------------------------------------------------------------------------------------------------------------------------------------------------------------------------------------------------------------------------------------------------------------------------------------------------------------|
|  |  |  |  |  |  | 01890C_A:SWD3:C6_02230W_A:ALG11:C6_02290C_A:C6_02430W_A:MRT4:C6_02900C_A:POP4:C6_03210C_A:C6_03380W_A:C6_03390W_A:C6_03440W_A:SPB1:C6_04240W_A:NOP8:C7_00160C_A:C7_00220W_A:C7_00330C_A:THG1:NOP15:C7_01030C_A:DBP7:C7_01210C_A:C7_01270C_A:C7_01360C_A:GIR2:FLU1:C7_01570C_A:C7_01950W_A:LIG1:C7_02460C_A:C7_02660C_A:C7_02930C_A:C7_03400C_A:ISY1:ENP2:C7_03590C_A:ENP1:C7_03850W_A:C7_03880C_A:C7_04150W_A:UTP18:CR_00430C_A:CR_00460C_A:BUD22:PWP2:CR_00830W_A:DAL81:CR_01320C_A:CR_01410C_A:CR_01550C_A:CR_01600C_A:CR_01670W_A:CR_01700C_A:CR_01710W_A:CR_01780W_A:CR_02030C_A:MCM6:CR_02420W_A:CR_02550C_A:RRP9:CR_02890C_A:SRP40:SMC5:CR_03200C_A:CR_03230W_A:CR_03360W_A:KTI12:NCS2:YVH1:SMC1:PRP42:CR_03940W_A:CR_04110W_A:CR_04170W_A:CR_04240C_A:CR_04500C_A:CR_04710W_A:NOC2:CR_05550C_A:RNR3:MTG2:DBP8:RFX1:RPL7:CR_06230W_A:FGR50:CR_06450W_A:RRN11:CR_06680C_A:NMD3:CR_06840W_A:CR_06970C_A:POL2:CR_07030C_A:CR_07310W_A:PIF1:FUN30:CR_07640C_A:DBP6:IMP4:CR_08000C_A:NOP10:SSB1:RIO2:ATS1:CR_08330W_A:CR_08410W_A:TSR1:MPS1:SSF1:CR_09740W_A:MED21:CR_09800C_A:DPB2:SIK1:UTP5:CR_10260W_A:CR_10410C_A:CR_10470C_A:DRS1:LTV1:POP3 |
|--|--|--|--|--|--|---------------------------------------------------------------------------------------------------------------------------------------------------------------------------------------------------------------------------------------------------------------------------------------------------------------------------------------------------------------------------------------------------------------------------------------------------------------------------------------------------------------------------------------------------------------------------------------------------------------------------------------------------------------------------------------------------------------------------------------------------------------------------------------------------------------------------------------------------------------------------------------------------------------------------------------------------------------------------------------------------------------------------------------------------------------------------------------------------------------------------------------------------|

|           |                           |                                       |                                                  |               |       |                                                                                                                                                                                                                                                                                                                                                                                                                                                                                                                                                                                                                                                                                                                                                                                                                                                                                                                                                                                                                                                                                                                                                                                                                                                                                                                                                                                                                                                                                                                                                                                                                                                                                                                                                                                                                                                                                                                                                                                                                                                                                                                                                                                                                                                                                                                                                                                                                                                                                                                                                                                                                                                               |
|-----------|---------------------------|---------------------------------------|--------------------------------------------------|---------------|-------|---------------------------------------------------------------------------------------------------------------------------------------------------------------------------------------------------------------------------------------------------------------------------------------------------------------------------------------------------------------------------------------------------------------------------------------------------------------------------------------------------------------------------------------------------------------------------------------------------------------------------------------------------------------------------------------------------------------------------------------------------------------------------------------------------------------------------------------------------------------------------------------------------------------------------------------------------------------------------------------------------------------------------------------------------------------------------------------------------------------------------------------------------------------------------------------------------------------------------------------------------------------------------------------------------------------------------------------------------------------------------------------------------------------------------------------------------------------------------------------------------------------------------------------------------------------------------------------------------------------------------------------------------------------------------------------------------------------------------------------------------------------------------------------------------------------------------------------------------------------------------------------------------------------------------------------------------------------------------------------------------------------------------------------------------------------------------------------------------------------------------------------------------------------------------------------------------------------------------------------------------------------------------------------------------------------------------------------------------------------------------------------------------------------------------------------------------------------------------------------------------------------------------------------------------------------------------------------------------------------------------------------------------------------|
| 1607<br>2 | rRNA<br>metabolic process | 422 out of<br>1061<br>genes,<br>39.8% | 835 out of<br>6473<br>background genes,<br>12.9% | 3.15E-<br>136 | 0.00% | HBR1:CNS1:RPO41:NRM1:RRS1:TRI1:C1_01160C_A:C1_02090C_A:ABP140:C1_02450C_A:PDE2:C1_02900C_A:TSR2:C1_03630W_A:RPP1:C1_03830C_A:C1_04040C_A:C1_04120C_A:ERB1:NOP4:C1_04510W_A:C1_04710C_A:C1_04970W_A:RRP6:REI1:TRY2:C1_05220C_A:C1_05360C_A:C1_05380C_A:RSM22:RPS27A:FAL1:C1_05650W_A:C1_06540C_A:NOP6:C1_06760C_A:RIA1:C1_07510W_A:C1_07660W_A:ERD1:C1_07950C_A:C1_07960W_A:FUN12:MLT1:DIP2:GCR3:GCD6:C1_08630W_A:MSS116:CEF1:C1_09390W_A:C1_09710C_A:C1_09790C_A:PDC2:DBP3:MNN23:FCY23:C1_10620W_A:RPA190:C1_10920W_A:C1_10950C_A:C1_10970W_A:C1_11000C_A:NEP1:KRR1:MUP1:C1_11900C_A:C1_11910W_A:TRP3:C1_12280C_A:CSI2:C1_12350W_A:C1_12440W_A:C1_12570C_A:C1_12630C_A:C1_12750C_A:C1_12760W_A:C1_12820C_A:REX3:RMP1:C1_13380W_A:MCU1:C1_13820C_A:C1_14080W_A:C1_14330W_A:MPP10:FAV3:C2_00200W_A:C2_00280C_A:C2_00410C_A:C2_00820W_A:C2_00840W_A:C2_01070W_A:C2_01220W_A:C2_01420C_A:REX2:C2_01820C_A:C2_01860C_A:C2_02120W_A:C2_02420C_A:UTP21:UTP22:PRS1:C2_02540W_A:C2_02630W_A:PDR17:MET1:PRP3:SCH9:C2_04120C_A:TBF1:SUV3:RIM2:C2_04570W_A:SNU114:C2_04700C_A:C2_04820W_A:PZF1:CKA2:C2_05050C_A:C2_05080C_A:MAK5:C2_05160C_A:RPF2:C2_05670C_A:C2_05750W_A:C2_05830C_A:C2_05840W_A:LAS1:ECM17:MAK16:C2_06520C_A:C2_06530W_A:C2_06660W_A:FHL1:C2_06850W_A:NOC4:C2_07360W_A:RCL1:PRS5:C2_07920W_A:NSA1:C2_08180C_A:EAF3:RRP8:C2_08530C_A:MSU1:UTP15:C2_09160W_A:C2_09180W_A:C2_09310C_A:PES1:TAZ1:RRP15:C2_09660W_A:SMM1:C2_09920W_A:CWC22:PUS7:C2_10740C_A:C2_10810W_A:RPS24:C3_00100W_A:UTP8:BUD21:SOF1:C3_00660W_A:C3_00830C_A:BMS1:ARP9:UTP20:NCE103:C3_01310W_A:C3_01560W_A:C3_02020W_A:C3_02040C_A:UTP4:ILV2:C3_02350W_A:C3_02670W_A:C3_02840W_A:C3_02850C_A:C3_03070W_A:C3_03110W_A:C3_03330C_A:HBR3:C3_04370C_A:C3_04380C_A:MAK21:ARV1:SFP1:NOP14:CEM1:C3_05160C_A:RPL8B:C3_05280C_A:C3_05380W_A:C3_05440C_A:QDR2:C3_05800W_A:C3_05860C_A:C3_05900W_A:NOG1:C3_06150W_A:DOT1:ISW2:C3_06370C_A:NSA2:PRP5:NOP13:C3_07550C_A:C3_07570C_A:RAD4:UTP9:C3_07800C_A:DUR4:RLP24:NMD5:C4_00690C_A:C4_00740W_A:C4_00800W_A:C4_00810C_A:C4_00880W_A:RAT1:C4_01280C_A:PWP1:C4_01500W_A:SLX4:HIT1:SAS10:RPC53:HCA4:ZUO1:C4_02880C_A:NAN1:C4_03140C_A:C4_03170W_A:DAO2:C4_03720C_A:C4_03740W_A:NUP84:C4_03830W_A:RRP42:RAM1:ECM1:DUO1:C4_04520W_A:SSZ1:BAS1:AGP3:RPL30:C4_05230C_A:C4_05260W_A:C4_05360C_A:C4_05650W_A:C4_06210C_A:C4_06410W_A:NOP1:C4_06790W_A:C4_06950W_A:C4_07060W_A:C4_07150W_A:MRP17:RMT2:C5_00920W_A:BUD23:CYC3:PUS4:C5_01430C_A:FYV5:SPB4:C5_01930W_A:C5_02010C_A:C5_02070C_A:RIX7:C5_02440C_A:SPR28:UTP13:CKB2:C5_03010W_A:RMS1:C5_03400C_A:C5_03920C_A:C5_04120C_A:HAS1:C5_04840C_A:C5_04910W_A:GRF10:C5_05340W_A:NOP5:CDC14:TOP1:C6_01040C |
|-----------|---------------------------|---------------------------------------|--------------------------------------------------|---------------|-------|---------------------------------------------------------------------------------------------------------------------------------------------------------------------------------------------------------------------------------------------------------------------------------------------------------------------------------------------------------------------------------------------------------------------------------------------------------------------------------------------------------------------------------------------------------------------------------------------------------------------------------------------------------------------------------------------------------------------------------------------------------------------------------------------------------------------------------------------------------------------------------------------------------------------------------------------------------------------------------------------------------------------------------------------------------------------------------------------------------------------------------------------------------------------------------------------------------------------------------------------------------------------------------------------------------------------------------------------------------------------------------------------------------------------------------------------------------------------------------------------------------------------------------------------------------------------------------------------------------------------------------------------------------------------------------------------------------------------------------------------------------------------------------------------------------------------------------------------------------------------------------------------------------------------------------------------------------------------------------------------------------------------------------------------------------------------------------------------------------------------------------------------------------------------------------------------------------------------------------------------------------------------------------------------------------------------------------------------------------------------------------------------------------------------------------------------------------------------------------------------------------------------------------------------------------------------------------------------------------------------------------------------------------------|

|  |  |  |  |  |  |                                                                                                                                                                                                                                                                                                                                                                                                                                                                                                                                                                                                                                                                                                                                                                                                                                                                                                                                                                                                                                                                                                                                                                                                                |
|--|--|--|--|--|--|----------------------------------------------------------------------------------------------------------------------------------------------------------------------------------------------------------------------------------------------------------------------------------------------------------------------------------------------------------------------------------------------------------------------------------------------------------------------------------------------------------------------------------------------------------------------------------------------------------------------------------------------------------------------------------------------------------------------------------------------------------------------------------------------------------------------------------------------------------------------------------------------------------------------------------------------------------------------------------------------------------------------------------------------------------------------------------------------------------------------------------------------------------------------------------------------------------------|
|  |  |  |  |  |  | <p>_A:C6_01120C_A:CIC1:C6_01890C_A:SWD3:C6_02230W_A:ALG11:C6_02290C_A:C6_02430W_A:MRT4:C6_02900C_A:POP4:C6_03210C_A:C6_03380W_A:C6_03390W_A:C6_03440W_A:SPB1:C6_04240W_A:NOP8:C7_00160C_A:C7_00220W_A:C7_00330C_A:THG1:RPA135:NOP15:C7_01030C_A:DBP7:C7_01210C_A:C7_01270C_A:C7_01360C_A:C7_01400C_A:GIR2:FLU1:C7_01570C_A:C7_01950W_A:LIG1:C7_02460C_A:C7_02660C_A:C7_02930C_A:C7_03400C_A:ISY1:ENP2:C7_03590C_A:ENP1:C7_03850W_A:C7_03880C_A:C7_04150W_A:UTP18:CR_00430C_A:CR_00460C_A:BUD22:PWP2:CR_00830W_A:DAL81:CR_01320C_A:CR_01410C_A:CR_01550C_A:CR_01600C_A:CR_01670W_A:CR_01700C_A:CR_01710W_A:CR_01780W_A:CR_01950W_A:CR_02030C_A:MCM6:CR_02420W_A:CR_02550C_A:RRP9:CR_02890C_A:SRP40:SMC5:CR_03200C_A:CR_03230W_A:CR_03360W_A:KTI12:NCS2:YVH1:SMC1:PRP42:CR_03940W_A:CR_04110W_A:CR_04170W_A:CR_04240C_A:CR_04500C_A:CR_04710W_A:NOC2:CR_05550C_A:RNR3:MTG2:DBP8:RFX1:RPL7:CR_06230W_A:FGR50:CR_06450W_A:RRN11:CR_06680C_A:NMD3:CR_06840W_A:CR_06970C_A:POL2:CR_07030C_A:CR_07310W_A:PIF1:FUN30:CR_07640C_A:DBP6:IMP4:CR_08000C_A:NOP10:SSB1:RIO2:ATS1:CR_08330W_A:CR_08410W_A:TSR1:MPS1:SSF1:CR_09740W_A:MED21:CR_09800C_A:DPB2:SIK1:UTP5:CR_10260W_A:CR_10410C_A:CR_10470C_A:DRS1:LTV1:POP3</p> |
|--|--|--|--|--|--|----------------------------------------------------------------------------------------------------------------------------------------------------------------------------------------------------------------------------------------------------------------------------------------------------------------------------------------------------------------------------------------------------------------------------------------------------------------------------------------------------------------------------------------------------------------------------------------------------------------------------------------------------------------------------------------------------------------------------------------------------------------------------------------------------------------------------------------------------------------------------------------------------------------------------------------------------------------------------------------------------------------------------------------------------------------------------------------------------------------------------------------------------------------------------------------------------------------|

|       |                       |                              |                                          |           |       |                                                                                                                                                                                                                                                                                                                                                                                                                                                                                                                                                                                                                                                                                                                                                                                                                                                                                                                                                                                                                                                                                                                                                                                                                                                                                                                                                                                                                                                                                                                                                                                                                                                                                                                                                                                                                                                                                                                                                                                                                                                                                                                                                                                                                                                                                                                                                                                                                                                                                                                                                                                                                                                               |
|-------|-----------------------|------------------------------|------------------------------------------|-----------|-------|---------------------------------------------------------------------------------------------------------------------------------------------------------------------------------------------------------------------------------------------------------------------------------------------------------------------------------------------------------------------------------------------------------------------------------------------------------------------------------------------------------------------------------------------------------------------------------------------------------------------------------------------------------------------------------------------------------------------------------------------------------------------------------------------------------------------------------------------------------------------------------------------------------------------------------------------------------------------------------------------------------------------------------------------------------------------------------------------------------------------------------------------------------------------------------------------------------------------------------------------------------------------------------------------------------------------------------------------------------------------------------------------------------------------------------------------------------------------------------------------------------------------------------------------------------------------------------------------------------------------------------------------------------------------------------------------------------------------------------------------------------------------------------------------------------------------------------------------------------------------------------------------------------------------------------------------------------------------------------------------------------------------------------------------------------------------------------------------------------------------------------------------------------------------------------------------------------------------------------------------------------------------------------------------------------------------------------------------------------------------------------------------------------------------------------------------------------------------------------------------------------------------------------------------------------------------------------------------------------------------------------------------------------------|
| 16070 | RNA metabolic process | 498 out of 1061 genes, 46.9% | 1245 out of 6473 background genes, 19.2% | 2.24E-113 | 0.00% | HBR1:CNS1:RPO41:NRM1:RRS1:TRI1:C1_01150C_A:C1_01160C_A:TRM2:C1_01530C_A:C1_02090C_A:ABP140:C1_02450C_A:PDE2:C1_02900C_A:TSR2:C1_03370W_A:C1_03630W_A:RPP1:C1_03830C_A:C1_04040C_A:C1_04120C_A:ERB1:NOP4:C1_04510W_A:C1_04530C_A:C1_04710C_A:C1_04970W_A:RRP6:REI1:TRY2:C1_05220C_A:C1_05360C_A:C1_05380C_A:RSM22:RPS27A:FAL1:C1_05650W_A:C1_06540C_A:NOP6:C1_06760C_A:RIA1:C1_07340W_A:LHP1:C1_07510W_A:C1_07660W_A:MRPL3:ERD1:C1_07950C_A:C1_07960W_A:FUN12:CAT8:MLT1:DIP2:GCR3:GCD6:C1_08630W_A:MSS116:C1_08890C_A:CEF1:C1_09390W_A:C1_09710C_A:C1_09790C_A:BUD31:PDC2:DBP3:MNN23:C1_10080W_A:FCY23:C1_10620W_A:RPA190:C1_10920W_A:C1_10950C_A:C1_10970W_A:C1_11000C_A:PET127:NEP1:KRR1:GAR1:MUP1:C1_11900C_A:C1_11910W_A:TRP3:C1_12280C_A:CSI2:C1_12350W_A:WRS1:C1_12440W_A:C1_12570C_A:C1_12630C_A:C1_12670C_A:C1_12750C_A:C1_12760W_A:C1_12820C_A:REX3:RMP1:C1_13380W_A:MCU1:C1_13820C_A:C1_14080W_A:C1_14330W_A:MPP10:FAV3:C2_00200W_A:C2_00280C_A:C2_00410C_A:C2_00820W_A:C2_00840W_A:C2_01070W_A:C2_01220W_A:C2_01420C_A:REX2:C2_01820C_A:PRP39:C2_01860C_A:C2_01870C_A:C2_02120W_A:C2_02420C_A:UTP21:UTP22:PR51:C2_02540W_A:C2_02630W_A:PDR17:MET1:PRP3:SCH9:C2_04120C_A:TBF1:SUV3:RIM2:C2_04570W_A:SNU114:C2_04700C_A:C2_04820W_A:PZF1:CKA2:C2_05050C_A:C2_05080C_A:MAK5:C2_05160C_A:RPF2:RPC40:KTI11:C2_05670C_A:C2_05750W_A:C2_05830C_A:C2_05840W_A:LAS1:ECM17:MAK16:C2_06480W_A:C2_06520C_A:C2_06530W_A:VAS1:C2_06650C_A:C2_06660W_A:FHL1:C2_06850W_A:NOC4:C2_07360W_A:RCL1:PRS5:C2_07920W_A:NSA1:C2_08180C_A:EAF3:RRP8:C2_08530C_A:MSU1:UTP15:MFG1:C2_09160W_A:C2_09180W_A:MED18:C2_09310C_A:PES1:TAZ1:RRP15:C2_09500W_A:C2_09660W_A:SMM1:C2_09920W_A:CWC22:UBP8:PUS7:C2_10740C_A:RPC11:C2_10810W_A:RPS24:C3_00100W_A:ULP3:UTP8:BUD21:SOF1:C3_00660W_A:C3_00830C_A:BMS1:ARP9:UTP20:NCE103:C3_01310W_A:C3_01560W_A:C3_02020W_A:C3_02040C_A:UTP4:ILV2:C3_02350W_A:C3_02670W_A:C3_02750W_A:C3_02840W_A:C3_02850C_A:C3_03070W_A:C3_03110W_A:C3_03330C_A:HBR3:C3_04370C_A:C3_04380C_A:MAK21:ARV1:SFP1:NOP14:CEM1:C3_05140C_A:C3_05160C_A:RPL8B:C3_05280C_A:C3_05380W_A:C3_05440C_A:QDR2:C3_05800W_A:C3_05860C_A:TRM12:C3_05900W_A:CTA4:NOG1:C3_06150W_A:DOT1:ISW2:C3_06370C_A:NSA2:PRP5:NOP13:C3_07400W_A:C3_07550C_A:C3_07570C_A:RIT1:RAD4:UTP9:C3_07800C_A:DUR4:RLP24:NMD5:C4_00690C_A:C4_00740W_A:C4_00800W_A:C4_00810C_A:C4_00880W_A:C4_00940W_A:RAT1:C4_01280C_A:PWP1:C4_01500W_A:TOA2:ZCF25:C4_02400C_A:SLX4:HIT1:SAS10:RPC53:HCA4:C4_02850W_A:ZUO1:C4_02880C_A:NAN1:C4_03140C_A:C4_03170W_A:DAO2:RAD2:C4_03720C_A:C4_03730C_A:C4_03740W_A:NUP84:C4_03830W_A:RRP42:RAM1:ECM1:DUO1:C4_04520W_A:SSZ1:BAS1:C4_04810C_A:AGP3:RPL30:C4_05230C_A:C4_ |
|-------|-----------------------|------------------------------|------------------------------------------|-----------|-------|---------------------------------------------------------------------------------------------------------------------------------------------------------------------------------------------------------------------------------------------------------------------------------------------------------------------------------------------------------------------------------------------------------------------------------------------------------------------------------------------------------------------------------------------------------------------------------------------------------------------------------------------------------------------------------------------------------------------------------------------------------------------------------------------------------------------------------------------------------------------------------------------------------------------------------------------------------------------------------------------------------------------------------------------------------------------------------------------------------------------------------------------------------------------------------------------------------------------------------------------------------------------------------------------------------------------------------------------------------------------------------------------------------------------------------------------------------------------------------------------------------------------------------------------------------------------------------------------------------------------------------------------------------------------------------------------------------------------------------------------------------------------------------------------------------------------------------------------------------------------------------------------------------------------------------------------------------------------------------------------------------------------------------------------------------------------------------------------------------------------------------------------------------------------------------------------------------------------------------------------------------------------------------------------------------------------------------------------------------------------------------------------------------------------------------------------------------------------------------------------------------------------------------------------------------------------------------------------------------------------------------------------------------------|

|  |  |  |  |  |  |                                                                                                                                                                                                                                                                                                                                                                                                                                                                                                                                                                                                                                                                                                                                                                                                                                                                                                                                                                                                                                                                                                                                                                                                                                                                                                                                                                                                                                                                                                                                                                                                                                                                                                                                                                                                                                                                        |
|--|--|--|--|--|--|------------------------------------------------------------------------------------------------------------------------------------------------------------------------------------------------------------------------------------------------------------------------------------------------------------------------------------------------------------------------------------------------------------------------------------------------------------------------------------------------------------------------------------------------------------------------------------------------------------------------------------------------------------------------------------------------------------------------------------------------------------------------------------------------------------------------------------------------------------------------------------------------------------------------------------------------------------------------------------------------------------------------------------------------------------------------------------------------------------------------------------------------------------------------------------------------------------------------------------------------------------------------------------------------------------------------------------------------------------------------------------------------------------------------------------------------------------------------------------------------------------------------------------------------------------------------------------------------------------------------------------------------------------------------------------------------------------------------------------------------------------------------------------------------------------------------------------------------------------------------|
|  |  |  |  |  |  | 05260W_A:C4_05360C_A:OFD1:C4_05650W_A:C4_06210C_A:C4_06410W_A:NOP1:C4_06790W_A:C4_06950W_A:C4_07060W_A:C4_07150W_A:C5_00280C_A:DUS4:MRP17:RMT2:C5_00920W_A:BUD23:CYC3:PUS4:C5_01430C_A:FYV5:SPB4:C5_01610W_A:C5_01930W_A:C5_02010C_A:C5_02070C_A:RIX7:C5_02440C_A:TIF5:SPR28:UTP13:BUR2:CKB2:MSW1:C5_03010W_A:RMS1:RPO26:C5_03400C_A:C5_03920C_A:C5_04120C_A:MSM1:HYS2:HAS1:C5_04840C_A:C5_04910W_A:GRF10:C5_05340W_A:NOP5:C6_00530C_A:C6_00640C_A:CDC14:TOP1:C6_01040C_A:C6_01120C_A:CIC1:C6_01890C_A:SWD3:C6_02230W_A:ALG11:C6_02290C_A:C6_02300C_A:C6_02350C_A:C6_02430W_A:PRP45:C6_02690C_A:MRT4:C6_02900C_A:POP4:C6_03210C_A:C6_03380W_A:C6_03390W_A:C6_03440W_A:NAM2:SPB1:C6_04240W_A:NOP8:ILS1:C6_04530C_A:C7_00160C_A:C7_00220W_A:C7_00330C_A:THG1:RPA135:NOP15:C7_01030C_A:DBP7:C7_01210C_A:C7_01270C_A:C7_01360C_A:C7_01400C_A:GIR2:FLU1:C7_01570C_A:C7_01950W_A:LIG1:C7_02340C_A:C7_02460C_A:C7_02660C_A:C7_02930C_A:C7_03400C_A:ISY1:ENP2:C7_03590C_A:ENP1:C7_03850W_A:C7_03880C_A:C7_04150W_A:UTP18:CR_00430C_A:CR_00460C_A:BUD22:PWP2:CR_00830W_A:TRM1:DAL81:CR_01320C_A:CR_01410C_A:PRS:CR_01550C_A:CR_01600C_A:CR_01670W_A:CDC60:CR_01700C_A:CR_01710W_A:CR_01780W_A:CR_01950W_A:CR_02030C_A:MCM6:CR_02420W_A:CR_02550C_A:RRP9:RPC31:CR_02890C_A:SRP40:ARC1:SMC5:CR_03110W_A:CR_03200C_A:CR_03230W_A:CR_03360W_A:KTI12:CR_03400W_A:NCS2:YVH1:SGD1:SMC1:PRP42:CR_03940W_A:CR_04110W_A:CR_04160C_A:CR_04170W_A:CR_04240C_A:CR_04300W_A:CR_04500C_A:CR_04560C_A:CR_04710W_A:RPB8:NOC2:CR_05550C_A:RNR3:MTG2:DBP8:RFX1:RPL7:CR_06230W_A:FGR50:CR_06450W_A:RRN11:CR_06680C_A:NMD3:CR_06840W_A:CR_06970C_A:POL2:CR_07030C_A:CR_07310W_A:PIF1:FUN30:CR_07640C_A:DBP6:IMP4:CR_08000C_A:NOP10:SSB1:RIO2:ATS1:CR_08330W_A:CR_08410W_A:TSR1:CR_08940W_A:MPS1:SSF1:CR_09740W_A:MED21:CR_09800C_A:DPB2:SIK1:UTP5:CR_10260W_A:CR_10410C_A:CR_10470C_A:DRS1:LTV1:POP3 |
|--|--|--|--|--|--|------------------------------------------------------------------------------------------------------------------------------------------------------------------------------------------------------------------------------------------------------------------------------------------------------------------------------------------------------------------------------------------------------------------------------------------------------------------------------------------------------------------------------------------------------------------------------------------------------------------------------------------------------------------------------------------------------------------------------------------------------------------------------------------------------------------------------------------------------------------------------------------------------------------------------------------------------------------------------------------------------------------------------------------------------------------------------------------------------------------------------------------------------------------------------------------------------------------------------------------------------------------------------------------------------------------------------------------------------------------------------------------------------------------------------------------------------------------------------------------------------------------------------------------------------------------------------------------------------------------------------------------------------------------------------------------------------------------------------------------------------------------------------------------------------------------------------------------------------------------------|



|       |                                   |                                       |                                                     |               |       |                                                                                                                                                                                                                                                                                                                                                                                                                                                                                                                                                                                                                                                                                                                                                                                                                                                                                                                                                                                                                                                                                                                                                                                                                                                                                                                                                                                                                                                                                                                                                                                                                                                                                                                                                                                                                                                                                                                                                                                                                                                                                                                                                                                                                                                                                                                                                                                                                                                                                                                                                                                                                                                                |
|-------|-----------------------------------|---------------------------------------|-----------------------------------------------------|---------------|-------|----------------------------------------------------------------------------------------------------------------------------------------------------------------------------------------------------------------------------------------------------------------------------------------------------------------------------------------------------------------------------------------------------------------------------------------------------------------------------------------------------------------------------------------------------------------------------------------------------------------------------------------------------------------------------------------------------------------------------------------------------------------------------------------------------------------------------------------------------------------------------------------------------------------------------------------------------------------------------------------------------------------------------------------------------------------------------------------------------------------------------------------------------------------------------------------------------------------------------------------------------------------------------------------------------------------------------------------------------------------------------------------------------------------------------------------------------------------------------------------------------------------------------------------------------------------------------------------------------------------------------------------------------------------------------------------------------------------------------------------------------------------------------------------------------------------------------------------------------------------------------------------------------------------------------------------------------------------------------------------------------------------------------------------------------------------------------------------------------------------------------------------------------------------------------------------------------------------------------------------------------------------------------------------------------------------------------------------------------------------------------------------------------------------------------------------------------------------------------------------------------------------------------------------------------------------------------------------------------------------------------------------------------------------|
| 30490 | maturati<br>on of<br>SSU-<br>rRNA | 336 out of<br>1061<br>genes,<br>31.7% | 627 out of<br>6473<br>backgroun<br>d genes,<br>9.7% | 3.43E-<br>113 | 0.00% | HBR1:CNS1:RPO41:NRM1:RRS1:C1_01160C_A:C1_02090C_A:ABP140:C1_02450C_A:C1_02900C_A:TSR2:C1_03630W_A:RPP1:C1_03830C_A:C1_04040C_A:C1_04120C_A:NOP4:C1_04510W_A:C1_04710C_A:REI1:TRY2:C1_05220C_A:C1_05360C_A:C1_05380C_A:RSM22:RPS27A:FAL1:C1_05650W_A:C1_06540C_A:NOP6:RIA1:C1_07510W_A:C1_07660W_A:C1_07960W_A:FUN12:MLT1:DIP2:GCD6:C1_08630W_A:MSS116:CEF1:C1_09390W_A:C1_09710C_A:C1_09790C_A:PDC2:MNN23:FCY23:C1_10950C_A:C1_11000C_A:NEP1:KRR1:MUP1:C1_11900C_A:C1_12280C_A:C1_12350W_A:C1_12440W_A:C1_12570C_A:C1_12630C_A:C1_12750C_A:C1_12820C_A:RMP1:C1_13380W_A:C1_13820C_A:C1_14080W_A:C1_14330W_A:MPP10:FAV3:C2_00200W_A:C2_00280C_A:C2_00410C_A:C2_00820W_A:C2_00840W_A:C2_01070W_A:C2_01220W_A:C2_01420C_A:C2_01820C_A:C2_02120W_A:C2_02420C_A:PRS1:C2_02540W_A:C2_02630W_A:PDR17:MET1:PRP3:SCH9:C2_04120C_A:TBF1:SUV3:RIM2:C2_04570W_A:C2_04700C_A:C2_04820W_A:PZF1:CKA2:C2_05050C_A:C2_05080C_A:MAK5:C2_05160C_A:C2_05670C_A:C2_05750W_A:C2_05830C_A:C2_05840W_A:LAS1:MAK16:C2_06520C_A:C2_06660W_A:FHL1:C2_06850W_A:NOC4:C2_07360W_A:RCL1:PRS5:C2_07920W_A:NSA1:C2_08180C_A:RRP8:C2_08530C_A:MSU1:UTP15:C2_09160W_A:C2_09310C_A:PES1:TAZ1:RRP15:C2_09660W_A:SMM1:C2_09920W_A:CWC22:C2_10740C_A:C2_10810W_A:RPS24:C3_00100W_A:UTP8:BUD21:SOF1:C3_00660W_A:BMS1:UTP20:NCE103:C3_01310W_A:C3_01560W_A:C3_02020W_A:C3_02040C_A:UTP4:C3_02350W_A:C3_02670W_A:C3_02840W_A:C3_02850C_A:C3_03070W_A:C3_03110W_A:C3_03330C_A:HBR3:C3_04370C_A:C3_04380C_A:MAK21:SFP1:NOP14:CEM1:C3_05160C_A:QDR2:C3_05800W_A:C3_06150W_A:DOT1:ISW2:C3_06370C_A:NSA2:PRP5:NOP13:C3_07550C_A:RAD4:UTP9:C3_07800C_A:DUR4:RLP24:NMD5:C4_00690C_A:C4_00740W_A:C4_00800W_A:C4_00810C_A:C4_00880W_A:RAT1:C4_01280C_A:C4_01500W_A:SLX4:HIT1:SAS10:RPC53:HCA4:C4_02880C_A:NAN1:C4_03140C_A:C4_03170W_A:C4_03720C_A:C4_03740W_A:NUP84:C4_03830W_A:ECM1:DUO1:C4_04520W_A:BAS1:C4_05260W_A:C4_05650W_A:C4_06790W_A:C4_07060W_A:C4_07150W_A:MRP17:C5_00920W_A:BUD23:CYC3:PUS4:C5_01430C_A:FYV5:SPB4:C5_02010C_A:C5_02070C_A:RIX7:C5_02440C_A:SPR28:UTP13:C5_03010W_A:RMS1:C5_03400C_A:C5_03920C_A:C5_04120C_A:HAS1:C5_04840C_A:C5_04910W_A:GRF10:C5_05340W_A:NOP5:CDC14:TOP1:C6_01040C_A:CIC1:C6_01890C_A:C6_02230W_A:ALG11:C6_02290C_A:C6_02430W_A:C6_02900C_A:POP4:C6_03210C_A:C6_03380W_A:C6_03440W_A:C6_04240W_A:NOP8:C7_00160C_A:C7_00220W_A:C7_00330C_A:THG1:NOP15:C7_01030C_A:DBP7:C7_01210C_A:C7_01270C_A:C7_01360C_A:C7_01950W_A:LIG1:C7_02460C_A:C7_02930C_A:C7_03400C_A:ISY1:ENP2:C7_03590C_A:ENP1:C7_03850W_A:C7_03880C_A:C7_04150W_A:UTP18:CR_00430C_A:CR_00460C_A:BUD22:PWP2:CR_00830W_A:DAL81:CR_01410C_A:CR_01600C_A:CR_01700C_A:CR_01710W_A:CR_01780W_A:CR_02030C_A: |
|-------|-----------------------------------|---------------------------------------|-----------------------------------------------------|---------------|-------|----------------------------------------------------------------------------------------------------------------------------------------------------------------------------------------------------------------------------------------------------------------------------------------------------------------------------------------------------------------------------------------------------------------------------------------------------------------------------------------------------------------------------------------------------------------------------------------------------------------------------------------------------------------------------------------------------------------------------------------------------------------------------------------------------------------------------------------------------------------------------------------------------------------------------------------------------------------------------------------------------------------------------------------------------------------------------------------------------------------------------------------------------------------------------------------------------------------------------------------------------------------------------------------------------------------------------------------------------------------------------------------------------------------------------------------------------------------------------------------------------------------------------------------------------------------------------------------------------------------------------------------------------------------------------------------------------------------------------------------------------------------------------------------------------------------------------------------------------------------------------------------------------------------------------------------------------------------------------------------------------------------------------------------------------------------------------------------------------------------------------------------------------------------------------------------------------------------------------------------------------------------------------------------------------------------------------------------------------------------------------------------------------------------------------------------------------------------------------------------------------------------------------------------------------------------------------------------------------------------------------------------------------------------|

|  |  |  |  |  |  |                                                                                                                                                                                                                                                                                                                                                                                                                                                                        |
|--|--|--|--|--|--|------------------------------------------------------------------------------------------------------------------------------------------------------------------------------------------------------------------------------------------------------------------------------------------------------------------------------------------------------------------------------------------------------------------------------------------------------------------------|
|  |  |  |  |  |  | MCM6:CR_02420W_A:CR_02550C_A:RRP9:CR_02890C_A:SRP40:SMC5:CR_03200C_A:CR_03230W_A:CR_03360W_A:KTI12:NCS2:YVH1:SMC1:CR_03940W_A:CR_04110W_A:CR_04240C_A:CR_04710W_A:NOC2:CR_05550C_A:RNR3:MTG2:DBP8:RFX1:CR_06230W_A:FGR50:CR_06450W_A:RRN11:CR_06680C_A:NMD3:CR_06840W_A:POL2:CR_07030C_A:CR_07310W_A:PIF1:FUN30:DBP6:IMP4:CR_08000C_A:RIO2:ATS1:CR_08330W_A:CR_08410W_A:TSR1:MPS1:CR_09740W_A:CR_09800C_A:DPB2:UTP5:CR_10260W_A:CR_10410C_A:CR_10470C_A:DRS1:LTV1:POP3 |
|--|--|--|--|--|--|------------------------------------------------------------------------------------------------------------------------------------------------------------------------------------------------------------------------------------------------------------------------------------------------------------------------------------------------------------------------------------------------------------------------------------------------------------------------|

|       |                                    |                              |                                        |           |       |                                                                                                                                                                                                                                                                                                                                                                                                                                                                                                                                                                                                                                                                                                                                                                                                                                                                                                                                                                                                                                                                                                                                                                                                                                                                                                                                                                                                                                                                                                                                                                                                                                                                                                                                                                                                                                                                                                                                                                                                                                                                                                                                                                                                                                                                                                                                                                                                                                                                                                                                                                                                                                                                |
|-------|------------------------------------|------------------------------|----------------------------------------|-----------|-------|----------------------------------------------------------------------------------------------------------------------------------------------------------------------------------------------------------------------------------------------------------------------------------------------------------------------------------------------------------------------------------------------------------------------------------------------------------------------------------------------------------------------------------------------------------------------------------------------------------------------------------------------------------------------------------------------------------------------------------------------------------------------------------------------------------------------------------------------------------------------------------------------------------------------------------------------------------------------------------------------------------------------------------------------------------------------------------------------------------------------------------------------------------------------------------------------------------------------------------------------------------------------------------------------------------------------------------------------------------------------------------------------------------------------------------------------------------------------------------------------------------------------------------------------------------------------------------------------------------------------------------------------------------------------------------------------------------------------------------------------------------------------------------------------------------------------------------------------------------------------------------------------------------------------------------------------------------------------------------------------------------------------------------------------------------------------------------------------------------------------------------------------------------------------------------------------------------------------------------------------------------------------------------------------------------------------------------------------------------------------------------------------------------------------------------------------------------------------------------------------------------------------------------------------------------------------------------------------------------------------------------------------------------------|
| 42274 | ribosomal small subunit biogenesis | 338 out of 1061 genes, 31.9% | 636 out of 6473 background genes, 9.8% | 1.52E-112 | 0.00% | HBR1:CNS1:RPO41:NRM1:RRS1:C1_01160C_A:C1_02090C_A:ABP140:C1_02450C_A:C1_02900C_A:TSR2:C1_03630W_A:RPP1:C1_03830C_A:C1_04040C_A:C1_04120C_A:NOP4:C1_04510W_A:C1_04710C_A:REI1:TRY2:C1_05220C_A:C1_05360C_A:C1_05380C_A:RSM22:RPS27A:FAL1:C1_05650W_A:C1_06540C_A:NOP6:RIA1:C1_07510W_A:C1_07660W_A:C1_07960W_A:FUN12:MLT1:DIP2:GCD6:C1_08630W_A:MSS116:CEF1:C1_09390W_A:C1_09710C_A:C1_09790C_A:PDC2:MNN23:FCY23:C1_10950C_A:C1_11000C_A:NEP1:KRR1:MUP1:C1_11900C_A:C1_12280C_A:C1_12350W_A:C1_12440W_A:C1_12570C_A:C1_12630C_A:C1_12750C_A:C1_12820C_A:RMP1:C1_13380W_A:C1_13820C_A:C1_14080W_A:C1_14330W_A:MPP10:FAV3:C2_00200W_A:C2_00280C_A:C2_00410C_A:C2_00820W_A:C2_00840W_A:C2_01070W_A:C2_01220W_A:C2_01420C_A:C2_01820C_A:C2_02120W_A:C2_02420C_A:PRS1:C2_02540W_A:C2_02630W_A:PDR17:MET1:PRP3:SCH9:C2_04120C_A:TBF1:SUV3:RIM2:C2_04570W_A:C2_04700C_A:C2_04820W_A:PZF1:CKA2:C2_05050C_A:C2_05080C_A:MAK5:C2_05160C_A:C2_05670C_A:C2_05750W_A:C2_05830C_A:C2_05840W_A:LAS1:MAK16:C2_06520C_A:C2_06660W_A:FHL1:C2_06850W_A:NOC4:C2_07360W_A:RCL1:PRS5:C2_07920W_A:NSA1:C2_08180C_A:RRP8:C2_08530C_A:MSU1:UTP15:C2_09160W_A:C2_09310C_A:PES1:TAZ1:RRP15:C2_09660W_A:SMM1:C2_09920W_A:CWC22:C2_10740C_A:C2_10810W_A:RPS24:C3_00100W_A:UTP8:BUD21:SOF1:C3_00660W_A:BMS1:UTP20:NCE103:C3_01310W_A:C3_01560W_A:C3_02020W_A:C3_02040C_A:UTP4:C3_02350W_A:C3_02670W_A:C3_02840W_A:C3_02850C_A:C3_03070W_A:C3_03110W_A:C3_03330C_A:HBR3:C3_04370C_A:C3_04380C_A:MAK21:SFP1:NOP14:CEM1:C3_05160C_A:QDR2:C3_05800W_A:C3_06150W_A:DOT1:ISW2:C3_06370C_A:NSA2:PRP5:NOP13:C3_07550C_A:RAD4:UTP9:C3_07800C_A:DUR4:RLP24:NMD5:C4_00690C_A:C4_00740W_A:C4_00800W_A:C4_00810C_A:C4_00880W_A:RAT1:C4_01280C_A:C4_01500W_A:SLX4:HIT1:SAS10:RPC53:HCA4:C4_02880C_A:NAN1:C4_03140C_A:C4_03170W_A:C4_03720C_A:C4_03740W_A:NUP84:C4_03830W_A:ECM1:DUO1:C4_04520W_A:BAS1:C4_05260W_A:C4_05650W_A:C4_06790W_A:C4_07060W_A:C4_07150W_A:MRP17:C5_00920W_A:BUD23:CYC3:PUS4:C5_01430C_A:FYV5:SPB4:C5_02010C_A:C5_02070C_A:RIX7:C5_02440C_A:SPR28:UTP13:C5_03010W_A:RMS1:C5_03400C_A:C5_03920C_A:C5_04120C_A:HAS1:C5_04840C_A:C5_04910W_A:GRF10:C5_05340W_A:NOP5:CDC14:TOP1:C6_01040C_A:CIC1:C6_01890C_A:C6_02230W_A:ALG11:C6_02290C_A:C6_02430W_A:C6_02900C_A:POP4:C6_03210C_A:C6_03380W_A:C6_03440W_A:C6_04240W_A:NOP8:C7_00160C_A:C7_00220W_A:C7_00330C_A:THG1:NOP15:C7_01030C_A:DBP7:C7_01210C_A:C7_01270C_A:C7_01360C_A:C7_01950W_A:LIG1:C7_02460C_A:C7_02930C_A:C7_03400C_A:ISY1:ENP2:C7_03590C_A:ENP1:C7_03850W_A:C7_03880C_A:C7_04150W_A:UTP18:CR_00430C_A:CR_00460C_A:BUD22:PWP2:CR_00830W_A:DAL81:CR_01410C_A:CR_01600C_A:CR_01700C_A:CR_01710W_A:CR_01780W_A:CR_02030C_A: |
|-------|------------------------------------|------------------------------|----------------------------------------|-----------|-------|----------------------------------------------------------------------------------------------------------------------------------------------------------------------------------------------------------------------------------------------------------------------------------------------------------------------------------------------------------------------------------------------------------------------------------------------------------------------------------------------------------------------------------------------------------------------------------------------------------------------------------------------------------------------------------------------------------------------------------------------------------------------------------------------------------------------------------------------------------------------------------------------------------------------------------------------------------------------------------------------------------------------------------------------------------------------------------------------------------------------------------------------------------------------------------------------------------------------------------------------------------------------------------------------------------------------------------------------------------------------------------------------------------------------------------------------------------------------------------------------------------------------------------------------------------------------------------------------------------------------------------------------------------------------------------------------------------------------------------------------------------------------------------------------------------------------------------------------------------------------------------------------------------------------------------------------------------------------------------------------------------------------------------------------------------------------------------------------------------------------------------------------------------------------------------------------------------------------------------------------------------------------------------------------------------------------------------------------------------------------------------------------------------------------------------------------------------------------------------------------------------------------------------------------------------------------------------------------------------------------------------------------------------------|

|  |  |  |  |  |  |                                                                                                                                                                                                                                                                                                                                                                                                                                                                                  |
|--|--|--|--|--|--|----------------------------------------------------------------------------------------------------------------------------------------------------------------------------------------------------------------------------------------------------------------------------------------------------------------------------------------------------------------------------------------------------------------------------------------------------------------------------------|
|  |  |  |  |  |  | MCM6:CR_02420W_A:CR_02550C_A:RRP9:CR_02890C_A:SRP40:SMC5:CR_03200C_A:CR_03230W_A:CR_03360W_A:KTI12:NCS2:YVH1:SGD1:SMC1:CR_03940W_A:CR_04110W_A:CR_04240C_A:CR_04710W_A:NOC2:CR_05550C_A:RNR3:MTG2:DBP8:RFX1:CR_06230W_A:FGR50:CR_06450W_A:RRN11:CR_06680C_A:NMD3:CR_06840W_A:POL2:CR_07030C_A:CR_07310W_A:PIF1:FUN30:DBP6:IMP4:CR_08000C_A:RIO2:ATS1:CR_08330W_A:CR_08410W_A:TSR1:MPS1:ELF1:CR_09740W_A:CR_09800C_A:DPB2:UTP5:CR_10260W_A:CR_10410C_A:CR_10470C_A:DRS1:LTV1:POP3 |
|--|--|--|--|--|--|----------------------------------------------------------------------------------------------------------------------------------------------------------------------------------------------------------------------------------------------------------------------------------------------------------------------------------------------------------------------------------------------------------------------------------------------------------------------------------|

|     |                                                                                                                                       |                                       |                                                     |               |       |                                                                                                                                                                                                                                                                                                                                                                                                                                                                                                                                                                                                                                                                                                                                                                                                                                                                                                                                                                                                                                                                                                                                                                                                                                                                                                                                                                                                                                                                                                                                                                                                                                                                                                                                                                                                                                                                                                                                                                                                                                                                                                                                                                                                                                                                                                                                                                                                                                                                                                                                                                                                                                                                                                                                                                                                                   |
|-----|---------------------------------------------------------------------------------------------------------------------------------------|---------------------------------------|-----------------------------------------------------|---------------|-------|-------------------------------------------------------------------------------------------------------------------------------------------------------------------------------------------------------------------------------------------------------------------------------------------------------------------------------------------------------------------------------------------------------------------------------------------------------------------------------------------------------------------------------------------------------------------------------------------------------------------------------------------------------------------------------------------------------------------------------------------------------------------------------------------------------------------------------------------------------------------------------------------------------------------------------------------------------------------------------------------------------------------------------------------------------------------------------------------------------------------------------------------------------------------------------------------------------------------------------------------------------------------------------------------------------------------------------------------------------------------------------------------------------------------------------------------------------------------------------------------------------------------------------------------------------------------------------------------------------------------------------------------------------------------------------------------------------------------------------------------------------------------------------------------------------------------------------------------------------------------------------------------------------------------------------------------------------------------------------------------------------------------------------------------------------------------------------------------------------------------------------------------------------------------------------------------------------------------------------------------------------------------------------------------------------------------------------------------------------------------------------------------------------------------------------------------------------------------------------------------------------------------------------------------------------------------------------------------------------------------------------------------------------------------------------------------------------------------------------------------------------------------------------------------------------------------|
| 462 | maturati<br>on of<br>SSU-<br>rRNA<br>from<br>tricistroni<br>c rRNA<br>transcrip<br>t (SSU-<br>rRNA,<br>5.8S<br>rRNA,<br>LSU-<br>rRNA) | 333 out of<br>1061<br>genes,<br>31.4% | 620 out of<br>6473<br>backgroun<br>d genes,<br>9.6% | 2.18E-<br>112 | 0.00% | HBR1:CNS1:RPO41:NRM1:RRS1:C1_01160C_A:C1_02090C_A:ABP140:C1_02450C_A<br>:C1_02900C_A:TSR2:C1_03630W_A:RPP1:C1_03830C_A:C1_04040C_A:C1_04120C_<br>A:NOP4:C1_04510W_A:C1_04710C_A:REI1:TRY2:C1_05220C_A:C1_05360C_A:C1_0<br>5380C_A:RSM22:RPS27A:FAL1:C1_05650W_A:C1_06540C_A:NOP6:RIA1:C1_07510<br>W_A:C1_07660W_A:C1_07960W_A:FUN12:MLT1:DIP2:GCD6:C1_08630W_A:MSS11<br>6:CEF1:C1_09390W_A:C1_09710C_A:C1_09790C_A:PDC2:MNN23:FCY23:C1_10950<br>C_A:C1_11000C_A:NEP1:KRR1:MUP1:C1_11900C_A:C1_12280C_A:C1_12350W_A:C<br>1_12440W_A:C1_12570C_A:C1_12630C_A:C1_12750C_A:C1_12820C_A:RMP1:C1_<br>13380W_A:C1_13820C_A:C1_14080W_A:C1_14330W_A:MPP10:FAV3:C2_00200W<br>_A:C2_00280C_A:C2_00410C_A:C2_00820W_A:C2_00840W_A:C2_01070W_A:C2_0<br>1220W_A:C2_01420C_A:C2_01820C_A:C2_02120W_A:C2_02420C_A:PRS1:C2_025<br>40W_A:C2_02630W_A:PDR17:MET1:PRP3:SCH9:C2_04120C_A:TBF1:SUV3:RIM2:C2<br>_04570W_A:C2_04700C_A:C2_04820W_A:PZF1:CKA2:C2_05050C_A:C2_05080C_A:<br>MAK5:C2_05160C_A:C2_05670C_A:C2_05750W_A:C2_05830C_A:C2_05840W_A:LA<br>S1:MAK16:C2_06520C_A:C2_06660W_A:FHL1:C2_06850W_A:NOC4:C2_07360W_A<br>:RCL1:PRS5:C2_07920W_A:NSA1:C2_08180C_A:RRP8:C2_08530C_A:MSU1:UTP15:C<br>2_09160W_A:C2_09310C_A:PES1:TAZ1:RRP15:C2_09660W_A:SMM1:C2_09920W_<br>A:CWC22:C2_10740C_A:C2_10810W_A:RPS24:C3_00100W_A:UTP8:BUD21:SOF1:C<br>3_00660W_A:BMS1:UTP20:NCE103:C3_01310W_A:C3_01560W_A:C3_02020W_A:<br>C3_02040C_A:UTP4:C3_02350W_A:C3_02670W_A:C3_02840W_A:C3_02850C_A:C<br>3_03070W_A:C3_03110W_A:C3_03330C_A:HBR3:C3_04370C_A:C3_04380C_A:MA<br>K21:SFP1:NOP14:CEM1:C3_05160C_A:QDR2:C3_05800W_A:C3_06150W_A:DOT1:IS<br>W2:C3_06370C_A:NSA2:PRP5:NOP13:C3_07550C_A:RAD4:UTP9:C3_07800C_A:DUR<br>4:RLP24:NMD5:C4_00690C_A:C4_00740W_A:C4_00800W_A:C4_00810C_A:C4_008<br>80W_A:RAT1:C4_01280C_A:C4_01500W_A:SLX4:HIT1:SAS10:RPC53:HCA4:C4_0288<br>0C_A:NAN1:C4_03140C_A:C4_03170W_A:C4_03720C_A:C4_03740W_A:NUP84:C4_<br>03830W_A:ECM1:DUO1:C4_04520W_A:BAS1:C4_05260W_A:C4_05650W_A:C4_06<br>790W_A:C4_07060W_A:C4_07150W_A:MRP17:C5_00920W_A:BUD23:CYC3:PUS4:C<br>5_01430C_A:FYV5:SPB4:C5_02010C_A:C5_02070C_A:RIX7:C5_02440C_A:SPR28:UT<br>P13:C5_03010W_A:RMS1:C5_03920C_A:C5_04120C_A:HAS1:C5_04840C_A:C5_049<br>10W_A:GRF10:C5_05340W_A:NOP5:CDC14:TOP1:C6_01040C_A:CIC1:C6_01890C_A<br>:C6_02230W_A:ALG11:C6_02290C_A:C6_02430W_A:C6_02900C_A:POP4:C6_0321<br>0C_A:C6_03380W_A:C6_03440W_A:C6_04240W_A:NOP8:C7_00160C_A:C7_00220<br>W_A:C7_00330C_A:THG1:NOP15:C7_01030C_A:DBP7:C7_01210C_A:C7_01270C_A:<br>C7_01360C_A:C7_01950W_A:LIG1:C7_02460C_A:C7_02930C_A:C7_03400C_A:ISY1:<br>ENP2:C7_03590C_A:ENP1:C7_03850W_A:C7_03880C_A:C7_04150W_A:UTP18:CR_<br>00430C_A:CR_00460C_A:BUD22:PWP2:CR_00830W_A:DAL81:CR_01410C_A:CR_01<br>600C_A:CR_01700C_A:CR_01710W_A:CR_01780W_A:CR_02030C_A:MCM6:CR_024 |
|-----|---------------------------------------------------------------------------------------------------------------------------------------|---------------------------------------|-----------------------------------------------------|---------------|-------|-------------------------------------------------------------------------------------------------------------------------------------------------------------------------------------------------------------------------------------------------------------------------------------------------------------------------------------------------------------------------------------------------------------------------------------------------------------------------------------------------------------------------------------------------------------------------------------------------------------------------------------------------------------------------------------------------------------------------------------------------------------------------------------------------------------------------------------------------------------------------------------------------------------------------------------------------------------------------------------------------------------------------------------------------------------------------------------------------------------------------------------------------------------------------------------------------------------------------------------------------------------------------------------------------------------------------------------------------------------------------------------------------------------------------------------------------------------------------------------------------------------------------------------------------------------------------------------------------------------------------------------------------------------------------------------------------------------------------------------------------------------------------------------------------------------------------------------------------------------------------------------------------------------------------------------------------------------------------------------------------------------------------------------------------------------------------------------------------------------------------------------------------------------------------------------------------------------------------------------------------------------------------------------------------------------------------------------------------------------------------------------------------------------------------------------------------------------------------------------------------------------------------------------------------------------------------------------------------------------------------------------------------------------------------------------------------------------------------------------------------------------------------------------------------------------------|

|  |  |  |  |  |  |                                                                                                                                                                                                                                                                                                                                                                                                                                     |
|--|--|--|--|--|--|-------------------------------------------------------------------------------------------------------------------------------------------------------------------------------------------------------------------------------------------------------------------------------------------------------------------------------------------------------------------------------------------------------------------------------------|
|  |  |  |  |  |  | 20W_A:CR_02550C_A:RRP9:CR_02890C_A:SRP40:SMC5:CR_03200C_A:CR_03360W_A:KTI12:NCS2:YVH1:SMC1:CR_03940W_A:CR_04110W_A:CR_04710W_A:NOC2:CR_05550C_A:RNR3:MTG2:DBP8:RFX1:CR_06230W_A:FGR50:CR_06450W_A:RRN11:CR_06680C_A:NMD3:CR_06840W_A:POL2:CR_07030C_A:CR_07310W_A:PIF1:FUN30:DBP6:IMP4:CR_08000C_A:RIO2:ATS1:CR_08330W_A:CR_08410W_A:TSR1:MPS1:CR_09740W_A:CR_09800C_A:DPB2:UTP5:CR_10260W_A:CR_10410C_A:CR_10470C_A:DRS1:LTV1:POP3 |
|--|--|--|--|--|--|-------------------------------------------------------------------------------------------------------------------------------------------------------------------------------------------------------------------------------------------------------------------------------------------------------------------------------------------------------------------------------------------------------------------------------------|

|       |                                |                              |                                          |           |       |                                                                                                                                                                                                                                                                                                                                                                                                                                                                                                                                                                                                                                                                                                                                                                                                                                                                                                                                                                                                                                                                                                                                                                                                                                                                                                                                                                                                                                                                                                                                                                                                                                                                                                                                                                                                                                                                                                                                                                                                                                                                                                                                                                                                                                                                                                                                                                                                                                                                                                                                                                                                                                                               |
|-------|--------------------------------|------------------------------|------------------------------------------|-----------|-------|---------------------------------------------------------------------------------------------------------------------------------------------------------------------------------------------------------------------------------------------------------------------------------------------------------------------------------------------------------------------------------------------------------------------------------------------------------------------------------------------------------------------------------------------------------------------------------------------------------------------------------------------------------------------------------------------------------------------------------------------------------------------------------------------------------------------------------------------------------------------------------------------------------------------------------------------------------------------------------------------------------------------------------------------------------------------------------------------------------------------------------------------------------------------------------------------------------------------------------------------------------------------------------------------------------------------------------------------------------------------------------------------------------------------------------------------------------------------------------------------------------------------------------------------------------------------------------------------------------------------------------------------------------------------------------------------------------------------------------------------------------------------------------------------------------------------------------------------------------------------------------------------------------------------------------------------------------------------------------------------------------------------------------------------------------------------------------------------------------------------------------------------------------------------------------------------------------------------------------------------------------------------------------------------------------------------------------------------------------------------------------------------------------------------------------------------------------------------------------------------------------------------------------------------------------------------------------------------------------------------------------------------------------------|
| 90304 | nucleic acid metabolic process | 542 out of 1061 genes, 51.1% | 1509 out of 6473 background genes, 23.3% | 6.01E-103 | 0.00% | HBR1:CNS1:RPO41:NRM1:RRS1:TRI1:C1_01150C_A:C1_01160C_A:TRM2:C1_01530C_A:C1_02090C_A:ABP140:C1_02380C_A:C1_02390W_A:C1_02450C_A:PDE2:C1_02900C_A:TSR2:C1_03260W_A:C1_03370W_A:C1_03630W_A:RPP1:C1_03830C_A:C1_04040C_A:C1_04120C_A:ERB1:NOP4:C1_04510W_A:C1_04530C_A:C1_04710C_A:C1_04970W_A:RRP6:REI1:TRY2:C1_05220C_A:C1_05270C_A:C1_05360C_A:C1_05380C_A:RSM22:RPS27A:FAL1:C1_05650W_A:RAD10:C1_06540C_A:NOP6:C1_06760C_A:RIA1:C1_07340W_A:C1_07470C_A:LHP1:C1_07510W_A:C1_07660W_A:ECO1:MRPL3:ERD1:C1_07950C_A:C1_07960W_A:FUN12:CAT8:MLT1:DIP2:GCR3:GCD6:C1_08630W_A:MSS116:C1_08890C_A:CEF1:C1_09390W_A:C1_09710C_A:C1_09790C_A:BUD31:PDC2:DBP3:MNN23:C1_10080W_A:FCY23:C1_10620W_A:APN2:RPA190:C1_10920W_A:C1_10950C_A:C1_10970W_A:C1_11000C_A:PET127:NEP1:KRR1:GAR1:MUP1:C1_11900C_A:C1_11910W_A:TRP3:C1_12280C_A:CSI2:C1_12350W_A:WRS1:C1_12440W_A:C1_12570C_A:C1_12630C_A:C1_12670C_A:C1_12750C_A:C1_12760W_A:C1_12820C_A:REX3:RMP1:C1_13380W_A:MCU1:C1_13560W_A:C1_13820C_A:C1_14080W_A:C1_14330W_A:MPP10:FAV3:C2_00200W_A:C2_00280C_A:C2_00410C_A:C2_00820W_A:C2_00840W_A:C2_01070W_A:C2_01220W_A:C2_01240C_A:ESC4:C2_01420C_A:REX2:C2_01820C_A:PRP39:C2_01860C_A:C2_01870C_A:C2_02120W_A:C2_02420C_A:UTP21:UTP22:PRS1:C2_02540W_A:C2_02630W_A:PDR17:MET1:PRP3:SCH9:C2_04120C_A:TBF1:SUV3:RIM2:C2_04570W_A:SNU114:C2_04700C_A:C2_04820W_A:PZF1:CKA2:C2_04990W_A:C2_05050C_A:C2_05080C_A:MAK5:C2_05160C_A:CDC21:RPF2:RPC40:KTI11:C2_05670C_A:C2_05750W_A:C2_05830C_A:C2_05840W_A:LAS1:CSM3:ECM17:MAK16:C2_06480W_A:C2_06520C_A:C2_06530W_A:VAS1:C2_06650C_A:C2_06660W_A:FHL1:C2_06850W_A:NOC4:C2_07360W_A:RCL1:PRS5:C2_07920W_A:NSA1:C2_08180C_A:EAF3:RRP8:C2_08530C_A:MSU1:UTP15:MFG1:CDC47:C2_09160W_A:C2_09180W_A:MED18:C2_09310C_A:PES1:TAZ1:RRP15:C2_09500W_A:C2_09660W_A:SMM1:C2_09920W_A:CWC22:UBP8:PUS7:C2_10740C_A:RPC11:C2_10810W_A:RPS24:C3_00100W_A:ULP3:UTP8:BUD21:SO F1:C3_00660W_A:C3_00830C_A:BMS1:ARP9:UTP20:NCE103:C3_01310W_A:C3_01560W_A:SCM3:C3_02020W_A:C3_02040C_A:UTP4:ILV2:C3_02350W_A:DDC1:C3_02670W_A:SMC3:C3_02750W_A:C3_02840W_A:C3_02850C_A:C3_03070W_A:C3_03110W_A:C3_03330C_A:HBR3:RAD53:C3_04370C_A:C3_04380C_A:MAK21:ARV1:SF1:NOP14:CEM1:C3_05140C_A:C3_05160C_A:WOR2:RPL8B:C3_05280C_A:C3_05380W_A:C3_05440C_A:QDR2:C3_05800W_A:C3_05860C_A:TRM12:C3_05900W_A:CTA4:NOG1:C3_06150W_A:MMS21:C3_06270C_A:DOT1:ISW2:C3_06370C_A:NSA2:C3_06630W_A:PRP5:NOP13:C3_07400W_A:C3_07550C_A:C3_07570C_A:RIT1:RAD4:UTP9:C3_07800C_A:DUR4:RLP24:NMD5:C4_00690C_A:C4_00700C_A:C4_00740W_A:MLH1:C4_00800W_A:C4_00810C_A:C4_00880W_A:C4_00940W_A:RAT1:C4_01280C_A:PWP1:C4_01500W_A:TOA2:ZCF25:C4_02400C_A:SLX4:HIT1:C4_02770C_A:S |
|-------|--------------------------------|------------------------------|------------------------------------------|-----------|-------|---------------------------------------------------------------------------------------------------------------------------------------------------------------------------------------------------------------------------------------------------------------------------------------------------------------------------------------------------------------------------------------------------------------------------------------------------------------------------------------------------------------------------------------------------------------------------------------------------------------------------------------------------------------------------------------------------------------------------------------------------------------------------------------------------------------------------------------------------------------------------------------------------------------------------------------------------------------------------------------------------------------------------------------------------------------------------------------------------------------------------------------------------------------------------------------------------------------------------------------------------------------------------------------------------------------------------------------------------------------------------------------------------------------------------------------------------------------------------------------------------------------------------------------------------------------------------------------------------------------------------------------------------------------------------------------------------------------------------------------------------------------------------------------------------------------------------------------------------------------------------------------------------------------------------------------------------------------------------------------------------------------------------------------------------------------------------------------------------------------------------------------------------------------------------------------------------------------------------------------------------------------------------------------------------------------------------------------------------------------------------------------------------------------------------------------------------------------------------------------------------------------------------------------------------------------------------------------------------------------------------------------------------------------|

|  |  |  |  |  |                                                                                                                                                                                                                                                                                                                                                                                                                                                                                                                                                                                                                                                                                                                                                                                                                                                                                                                                                                                                                                                                                                                                                                                                                                                                                                                                                                                                                                                                                                                                                                                                                                                                                                                                                                                                                                                                                                                                                                                                                                                                                                                                                                                                                                       |
|--|--|--|--|--|---------------------------------------------------------------------------------------------------------------------------------------------------------------------------------------------------------------------------------------------------------------------------------------------------------------------------------------------------------------------------------------------------------------------------------------------------------------------------------------------------------------------------------------------------------------------------------------------------------------------------------------------------------------------------------------------------------------------------------------------------------------------------------------------------------------------------------------------------------------------------------------------------------------------------------------------------------------------------------------------------------------------------------------------------------------------------------------------------------------------------------------------------------------------------------------------------------------------------------------------------------------------------------------------------------------------------------------------------------------------------------------------------------------------------------------------------------------------------------------------------------------------------------------------------------------------------------------------------------------------------------------------------------------------------------------------------------------------------------------------------------------------------------------------------------------------------------------------------------------------------------------------------------------------------------------------------------------------------------------------------------------------------------------------------------------------------------------------------------------------------------------------------------------------------------------------------------------------------------------|
|  |  |  |  |  | AS10:RPC53:HCA4:C4_02850W_A:ZUO1:C4_02880C_A:NAN1:C4_03140C_A:C4_03170W_A:DAO2:RAD2:C4_03720C_A:C4_03730C_A:C4_03740W_A:NUP84:C4_03830W_A:RRP42:C4_03870C_A:RAM1:ECM1:DUO1:C4_04520W_A:SSZ1:BAS1:C4_04810C_A:AGP3:RPL30:C4_05230C_A:C4_05260W_A:C4_05360C_A:OFD1:C4_05650W_A:C4_06210C_A:C4_06410W_A:NOP1:C4_06790W_A:C4_06950W_A:C4_07060W_A:C4_07150W_A:C5_00280C_A:DUS4:MRP17:EXO1:RMT2:C5_00920W_A:BUD23:CYC3:C5_01140C_A:PUS4:C5_01430C_A:FYV5:SPB4:C5_01610W_A:C5_01930W_A:C5_02010C_A:C5_02070C_A:RIX7:C5_02440C_A:TIF5:SPR28:UTP13:BUR2:CKB2:MSW1:C5_03010W_A:RMS1:RPO26:C5_03400C_A:C5_03920C_A:C5_04120C_A:MSM1:HY S2:HAS1:C5_04840C_A:C5_04910W_A:GRF10:C5_05340W_A:DNA2:NOP5:C6_00530C_A:C6_00640C_A:CDC14:TOP1:C6_01040C_A:C6_01120C_A:CIC1:RAD18:C6_01890C_A:SWD3:C6_02230W_A:ALG11:C6_02290C_A:C6_02300C_A:C6_02350C_A:C6_02430W_A:PRP45:C6_02690C_A:MRT4:C6_02900C_A:POP4:C6_03210C_A:ARP4:C6_03380W_A:C6_03390W_A:C6_03440W_A:NAM2:SPB1:C6_04240W_A:NOP8:ILS1:C6_04530C_A:C7_00160C_A:C7_00220W_A:C7_00330C_A:DCC1:PSF3:THG1:RPA135:NOP15:C7_01030C_A:DBP7:C7_01210C_A:C7_01270C_A:PSF1:C7_01360C_A:C7_01400C_A:GIR2:FLU1:C7_01570C_A:SMC6:C7_01950W_A:LIG1:C7_02340C_A:C7_02460C_A:C7_02660C_A:C7_02930C_A:C7_03400C_A:ISY1:ENP2:C7_03590C_A:ENP1:C7_03850W_A:C7_03880C_A:C7_04150W_A:UTP18:MMS22:RTT109:CR_00430C_A:CR_00460C_A:BUD22:PWP2:CR_00830W_A:TRM1:DAL81:CTF18:CR_01320C_A:CR_01410C_A:PRS:CR_01550C_A:CR_01600C_A:CR_01670W_A:CDC60:CR_01700C_A:CR_01710W_A:CR_01780W_A:CR_01950W_A:CR_02030C_A:MCM6:CR_02420W_A:CR_02550C_A:RRP9:RPC31:CR_02890C_A:SRP40:ARC1:SMC5:CR_03110W_A:CR_03200C_A:CR_03230W_A:CR_03340C_A:CR_03360W_A:KTI12:CR_03400W_A:CR_03440W_A:NCS2:YVH1:SGD1:SMC1:PRP42:CR_03940W_A:CR_04110W_A:CR_04160C_A:CR_04170W_A:CR_04240C_A:CR_04300W_A:CR_04500C_A:CR_04560C_A:CR_04710W_A:RPB8:NOC2:CR_05550C_A:RNR3:MTG2:DBP8:RFX1:RPL7:CR_06230W_A:FGR50:CR_06450W_A:RRN11:CR_06680C_A:NMD3:CR_06840W_A:CR_06970C_A:POL2:CR_07030C_A:CR_07310W_A:PIF1:FUN30:CR_07640C_A:CDC45:DBP6:IMP4:CR_08000C_A:NOP10:SSB1:RIO2:ATS1:CR_08330W_A:CR_08410W_A:TSR1:CR_08940W_A:MPS1:SSF1:CR_09740W_A:MED21:CR_09800C_A:DPB2:SIK1:CR_10180W_A:UTP5:CR_10260W_A:CR_10410C_A:CR_10470C_A:MCD1:DRS1:LTV1:POP3 |
|--|--|--|--|--|---------------------------------------------------------------------------------------------------------------------------------------------------------------------------------------------------------------------------------------------------------------------------------------------------------------------------------------------------------------------------------------------------------------------------------------------------------------------------------------------------------------------------------------------------------------------------------------------------------------------------------------------------------------------------------------------------------------------------------------------------------------------------------------------------------------------------------------------------------------------------------------------------------------------------------------------------------------------------------------------------------------------------------------------------------------------------------------------------------------------------------------------------------------------------------------------------------------------------------------------------------------------------------------------------------------------------------------------------------------------------------------------------------------------------------------------------------------------------------------------------------------------------------------------------------------------------------------------------------------------------------------------------------------------------------------------------------------------------------------------------------------------------------------------------------------------------------------------------------------------------------------------------------------------------------------------------------------------------------------------------------------------------------------------------------------------------------------------------------------------------------------------------------------------------------------------------------------------------------------|



|      |                                              |                              |                                          |           |       |                                                                                                                                                                                                                                                                                                                                                                                                                                                                                                                                                                                                                                                                                                                                                                                                                                                                                                                                                                                                                                                                                                                                                                                                                                                                                                                                                                                                                                                                                                                                                                                                                                                                                                                                                                                                                                                                                                                                                                                                                                                                                                                                                                                                                                                                                                                                                                                                                                                                                                                                                                                                                                                               |
|------|----------------------------------------------|------------------------------|------------------------------------------|-----------|-------|---------------------------------------------------------------------------------------------------------------------------------------------------------------------------------------------------------------------------------------------------------------------------------------------------------------------------------------------------------------------------------------------------------------------------------------------------------------------------------------------------------------------------------------------------------------------------------------------------------------------------------------------------------------------------------------------------------------------------------------------------------------------------------------------------------------------------------------------------------------------------------------------------------------------------------------------------------------------------------------------------------------------------------------------------------------------------------------------------------------------------------------------------------------------------------------------------------------------------------------------------------------------------------------------------------------------------------------------------------------------------------------------------------------------------------------------------------------------------------------------------------------------------------------------------------------------------------------------------------------------------------------------------------------------------------------------------------------------------------------------------------------------------------------------------------------------------------------------------------------------------------------------------------------------------------------------------------------------------------------------------------------------------------------------------------------------------------------------------------------------------------------------------------------------------------------------------------------------------------------------------------------------------------------------------------------------------------------------------------------------------------------------------------------------------------------------------------------------------------------------------------------------------------------------------------------------------------------------------------------------------------------------------------------|
| 6725 | cellular aromatic compound metabolic process | 586 out of 1061 genes, 55.2% | 1727 out of 6473 background genes, 26.7% | 4.04E-102 | 0.00% | HBR1:CNS1:RPO41:NRM1:RRS1:TRI1:HMT1:C1_01150C_A:C1_01160C_A:TRM2:C1_01530C_A:C1_02090C_A:ABP140:C1_02380C_A:C1_02390W_A:C1_02450C_A:SNZ1:SNO1:PDE2:C1_02900C_A:TSR2:C1_03260W_A:C1_03370W_A:C1_03630W_A:RPP1:C1_03830C_A:C1_04040C_A:C1_04120C_A:ERB1:NOP4:C1_04510W_A:C1_04530C_A:C1_04710C_A:C1_04970W_A:RRP6:REI1:TRY2:ARO4:C1_05220C_A:C1_05270C_A:C1_05360C_A:C1_05380C_A:RSM22:RPS27A:FAL1:C1_05650W_A:RAD10:BUD16:C1_06540C_A:NOP6:C1_06760C_A:RIA1:YMC1:C1_07340W_A:C1_07470C_A:LHP1:C1_07510W_A:C1_07660W_A:ADE4:ECO1:ADE5,7:MRPL3:ERD1:C1_07950C_A:C1_07960W_A:FUN12:CAT8:MLT1:DIP2:SAM4:GCR3:GCD6:C1_08630W_A:MSS116:C1_08890C_A:CEF1:C1_09390W_A:GUA1:C1_09710C_A:C1_09790C_A:BUD31:PDC2:DBP3:MNN23:C1_10080W_A:FCY23:C1_10620W_A:APN2:RPA190:C1_10920W_A:C1_10950C_A:C1_10970W_A:C1_11000C_A:PET127:NEP1:KRR1:GAR1:C1_11790W_A:MUP1:C1_11900C_A:C1_11910W_A:TRP3:C1_12280C_A:CSI2:C1_12350W_A:WRS1:C1_12440W_A:C1_12570C_A:C1_12630C_A:C1_12670C_A:C1_12750C_A:C1_12760W_A:C1_12820C_A:REX3:RMP1:C1_13380W_A:MCU1:C1_13560W_A:C1_13820C_A:C1_14080W_A:C1_14330W_A:MPP10:FAV3:C2_00200W_A:C2_00280C_A:C2_00410C_A:C2_00820W_A:C2_00840W_A:C2_01070W_A:C2_01220W_A:C2_01240C_A:ESC4:C2_01420C_A:APT1:REX2:C2_01820C_A:PRP39:C2_01860C_A:C2_01870C_A:ARO3:C2_02120W_A:C2_02420C_A:UTP21:UTP22:PRS1:C2_02540W_A:C2_02630W_A:PDR17:MET1:BNA31:PRP3:SCH9:C2_04120C_A:TBF1:SUV3:RIM2:C2_04570W_A:SNU114:C2_04700C_A:C2_04820W_A:PZF1:CKA2:C2_04990W_A:C2_05050C_A:C2_05080C_A:MAK5:C2_05160C_A:CDC21:RPF2:RPC40:KTI11:C2_05670C_A:C2_05750W_A:C2_05830C_A:C2_05840W_A:LAS1:CSM3:ECM17:SER1:MAK16:C2_06480W_A:C2_06520C_A:C2_06530W_A:VAS1:C2_06650C_A:C2_06660W_A:FHL1:C2_06850W_A:AAH1:NOC4:C2_07360W_A:RCL1:PRS5:C2_07920W_A:NSA1:C2_08180C_A:EAF3:RRP8:C2_08530C_A:MSU1:UTP15:MFG1:CDC47:C2_09160W_A:C2_09180W_A:MED18:C2_09310C_A:PES1:TAZ1:RRP15:C2_09500W_A:C2_09660W_A:SMM1:C2_09920W_A:CWC22:UBP8:PUS7:HEM3:C2_10740C_A:RPC11:C2_10810W_A:RPS24:C3_00100W_A:ULP3:UTP8:BUD21:SOF1:C3_00660W_A:C3_00830C_A:BMS1:ARP9:UTP20:NCE103:C3_01310W_A:URA3:RKI1:C3_01560W_A:SCM3:C3_02020W_A:C3_02040C_A:UTP4:ILV2:C3_02350W_A:PHA2:DDC1:C3_02670W_A:SMC3:C3_02750W_A:C3_02840W_A:C3_02850C_A:C3_03070W_A:C3_03110W_A:C3_03330C_A:YAH1:HB3:RAD53:C3_04370C_A:C3_04380C_A:ADE2:MAK21:ARV1:SFP1:NOP14:CEM1:C3_05140C_A:C3_05160C_A:WOR2:RPL8B:C3_05280C_A:C3_05380W_A:C3_05440C_A:QDR2:C3_05800W_A:C3_05860C_A:TRM12:C3_05900W_A:CTA4:NOG1:C3_06150W_A:MMS21:C3_06270C_A:DOT1:ISW2:C3_06370C_A:NSA2:C3_06630W_A:PRP5:NOP13:C3_07400W_A:C3_07550C_A:C3_07570C_A:RIT1:RAD4:UTP9:C3_07800C_A:DUR4:RLP24:NMD5:C4_00690C_A:C4_00700C_A:C4_00740W_A:MLH1:C4_00800 |
|------|----------------------------------------------|------------------------------|------------------------------------------|-----------|-------|---------------------------------------------------------------------------------------------------------------------------------------------------------------------------------------------------------------------------------------------------------------------------------------------------------------------------------------------------------------------------------------------------------------------------------------------------------------------------------------------------------------------------------------------------------------------------------------------------------------------------------------------------------------------------------------------------------------------------------------------------------------------------------------------------------------------------------------------------------------------------------------------------------------------------------------------------------------------------------------------------------------------------------------------------------------------------------------------------------------------------------------------------------------------------------------------------------------------------------------------------------------------------------------------------------------------------------------------------------------------------------------------------------------------------------------------------------------------------------------------------------------------------------------------------------------------------------------------------------------------------------------------------------------------------------------------------------------------------------------------------------------------------------------------------------------------------------------------------------------------------------------------------------------------------------------------------------------------------------------------------------------------------------------------------------------------------------------------------------------------------------------------------------------------------------------------------------------------------------------------------------------------------------------------------------------------------------------------------------------------------------------------------------------------------------------------------------------------------------------------------------------------------------------------------------------------------------------------------------------------------------------------------------------|

|  |  |  |  |  |  |                                                                                                                                                                                                                                                                                                                                                                                                                                                                                                                                                                                                                                                                                                                                                                                                                                                                                                                                                                                                                                                                                                                                                                                                                                                                                                                                                                                                                                                                                                                                                                                                                                                                                                                                                                                                                                                                                                                                                                                                                                                                                                                                                                                                                                                                                                                                                                                                                                                                                                          |
|--|--|--|--|--|--|----------------------------------------------------------------------------------------------------------------------------------------------------------------------------------------------------------------------------------------------------------------------------------------------------------------------------------------------------------------------------------------------------------------------------------------------------------------------------------------------------------------------------------------------------------------------------------------------------------------------------------------------------------------------------------------------------------------------------------------------------------------------------------------------------------------------------------------------------------------------------------------------------------------------------------------------------------------------------------------------------------------------------------------------------------------------------------------------------------------------------------------------------------------------------------------------------------------------------------------------------------------------------------------------------------------------------------------------------------------------------------------------------------------------------------------------------------------------------------------------------------------------------------------------------------------------------------------------------------------------------------------------------------------------------------------------------------------------------------------------------------------------------------------------------------------------------------------------------------------------------------------------------------------------------------------------------------------------------------------------------------------------------------------------------------------------------------------------------------------------------------------------------------------------------------------------------------------------------------------------------------------------------------------------------------------------------------------------------------------------------------------------------------------------------------------------------------------------------------------------------------|
|  |  |  |  |  |  | W_A:C4_00810C_A:C4_00880W_A:ARO1:C4_00940W_A:RAT1:C4_01280C_A:PWP1:C4_01500W_A:TOA2:ZCF25:C4_02400C_A:SLX4:HIT1:C4_02770C_A:SAS10:RPC53:HCA4:C4_02850W_A:ZUO1:C4_02880C_A:NAN1:C4_03140C_A:C4_03170W_A:DAO2:RAD2:C4_03720C_A:C4_03730C_A:C4_03740W_A:NUP84:C4_03830W_A:RRP42:C4_03870C_A:RAM1:ECM1:DUO1:C4_04520W_A:SSZ1:BAS1:C4_04810C_A:AGP3:RPL30:C4_05230C_A:C4_05260W_A:C4_05360C_A:OFD1:C4_05650W_A:TRP5:C4_06210C_A:C4_06410W_A:NOP1:C4_06790W_A:C4_06950W_A:C4_07060W_A:TRP4:C4_07150W_A:C5_00260W_A:C5_00280C_A:DUS4:MRP17:EXO1:RMT2:C5_00920W_A:BUD23:CYC3:C5_01140C_A:PUS4:C5_01430C_A:FYV5:SPB4:C5_01610W_A:C5_01930W_A:C5_02010C_A:C5_02070C_A:RIX7:PDE1:C5_02440C_A:TIF5:SPR28:UTP13:BUR2:CKB2:MSW1:C5_03010W_A:RMS1:RPO26:FUR1:C5_03400C_A:C5_03840W_A:HAM1:C5_03920C_A:C5_04120C_A:SAH1:URA7:MSM1:C5_04720C_A:HYS2:HAS1:C5_04840C_A:C5_04910W_A:GRF10:C5_05340W_A:DNA2:NOP5:C6_00530C_A:FC A1:C6_00640C_A:CDC14:TOP1:C6_01040C_A:C6_01120C_A:CIC1:RAD18:C6_01890C_A:SWD3:C6_02230W_A:ALG11:C6_02290C_A:C6_02300C_A:C6_02350C_A:C6_02430W_A:PRP45:C6_02690C_A:MRT4:C6_02900C_A:POP4:C6_03210C_A:ARP4:C6_03380W_A:C6_03390W_A:C6_03440W_A:NAM2:PAD1:SPB1:C6_04240W_A:NOP8:LS1:C6_04530C_A:C7_00160C_A:C7_00220W_A:C7_00330C_A:DCC1:PSF3:THG1:RPA135:NOP15:C7_01030C_A:DBP7:C7_01210C_A:C7_01270C_A:PSF1:C7_01360C_A:C7_01400C_A:GIR2:FLU1:C7_01570C_A:SMC6:C7_01950W_A:LIG1:C7_02340C_A:C7_02460C_A:C7_02660C_A:C7_02930C_A:C7_03400C_A:ISY1:ENP2:C7_03590C_A:ENP1:C7_03850W_A:C7_03880C_A:C7_04150W_A:UTP18:MIS12:MMS22:RTT109:CR_00430C_A:CR_00460C_A:ADE1:BUD22:PWP2:CR_00830W_A:TRM1:DAL81:CTF18:CR_01320C_A:CR_01410C_A:PRS:CR_01550C_A:TRP2:CR_01600C_A:MET6:CR_01670W_A:CDC60:CR_01700C_A:CR_01710W_A:CR_01780W_A:CR_01950W_A:CR_02030C_A:MCM6:CR_02420W_A:CR_02550C_A:RRP9:RPC31:CR_02890C_A:SRP40:ARC1:SMC5:CR_03110W_A:CR_03200C_A:CR_03230W_A:CR_03340C_A:CR_03360W_A:KTI12:CR_03400W_A:CR_03440W_A:NCS2:YVH1:SGD1:SMC1:PRP42:CR_03940W_A:CR_04110W_A:CR_04160C_A:CR_04170W_A:CR_04240C_A:CR_04300W_A:CR_04500C_A:CR_04560C_A:CR_04710W_A:ADE6:RPB8:CR_04920W_A:NOC2:CR_05550C_A:RNR3:MTG2:DBP8:RFX1:RPL7:CR_06230W_A:FGR50:CR_06450W_A:RRN11:CR_06680C_A:NMD3:CR_06840W_A:CR_06970C_A:POL2:MIS11:CR_07030C_A:URA2:CR_07310W_A:PIF1:FUN30:CR_07640C_A:ARO2:CDC45:DBP6:IMP4:CR_08000C_A:NOP10:SSB1:RIO2:ATS1:CR_08330W_A:CR_08410W_A:TSR1:CR_08940W_A:MPS1:SSF1:CR_09740W_A:MED21:CR_09800C_A:DPB2:SIK1:CR_10180W_A:UTP5:CR_10260W_A:CR_10410C_A:CR_10470C_A:MCD1:DRS1:LTV1:POP3 |
|--|--|--|--|--|--|----------------------------------------------------------------------------------------------------------------------------------------------------------------------------------------------------------------------------------------------------------------------------------------------------------------------------------------------------------------------------------------------------------------------------------------------------------------------------------------------------------------------------------------------------------------------------------------------------------------------------------------------------------------------------------------------------------------------------------------------------------------------------------------------------------------------------------------------------------------------------------------------------------------------------------------------------------------------------------------------------------------------------------------------------------------------------------------------------------------------------------------------------------------------------------------------------------------------------------------------------------------------------------------------------------------------------------------------------------------------------------------------------------------------------------------------------------------------------------------------------------------------------------------------------------------------------------------------------------------------------------------------------------------------------------------------------------------------------------------------------------------------------------------------------------------------------------------------------------------------------------------------------------------------------------------------------------------------------------------------------------------------------------------------------------------------------------------------------------------------------------------------------------------------------------------------------------------------------------------------------------------------------------------------------------------------------------------------------------------------------------------------------------------------------------------------------------------------------------------------------------|

|      |                                                  |                              |                                          |          |       |                                                                                                                                                                                                                                                                                                                                                                                                                                                                                                                                                                                                                                                                                                                                                                                                                                                                                                                                                                                                                                                                                                                                                                                                                                                                                                                                                                                                                                                                                                                                                                                                                                                                                                                                                                                                                                                                                                                                                                                                                                                                                                                                                                                                                                                                                                                                                                                                                                                                                                                                                                                                                                                              |
|------|--------------------------------------------------|------------------------------|------------------------------------------|----------|-------|--------------------------------------------------------------------------------------------------------------------------------------------------------------------------------------------------------------------------------------------------------------------------------------------------------------------------------------------------------------------------------------------------------------------------------------------------------------------------------------------------------------------------------------------------------------------------------------------------------------------------------------------------------------------------------------------------------------------------------------------------------------------------------------------------------------------------------------------------------------------------------------------------------------------------------------------------------------------------------------------------------------------------------------------------------------------------------------------------------------------------------------------------------------------------------------------------------------------------------------------------------------------------------------------------------------------------------------------------------------------------------------------------------------------------------------------------------------------------------------------------------------------------------------------------------------------------------------------------------------------------------------------------------------------------------------------------------------------------------------------------------------------------------------------------------------------------------------------------------------------------------------------------------------------------------------------------------------------------------------------------------------------------------------------------------------------------------------------------------------------------------------------------------------------------------------------------------------------------------------------------------------------------------------------------------------------------------------------------------------------------------------------------------------------------------------------------------------------------------------------------------------------------------------------------------------------------------------------------------------------------------------------------------------|
| 6139 | nucleobase-containing compound metabolic process | 566 out of 1061 genes, 53.3% | 1659 out of 6473 background genes, 25.6% | 4.79E-98 | 0.00% | HBR1:CNS1:RPO41:NRM1:RRS1:TRI1:C1_01150C_A:C1_01160C_A:TRM2:C1_01530C_A:C1_02090C_A:ABP140:C1_02380C_A:C1_02390W_A:C1_02450C_A:PDE2:C1_02900C_A:TSR2:C1_03260W_A:C1_03370W_A:C1_03630W_A:RPP1:C1_03830C_A:C1_04040C_A:C1_04120C_A:ERB1:NOP4:C1_04510W_A:C1_04530C_A:C1_04710C_A:C1_04970W_A:RRP6:REI1:TRY2:C1_05220C_A:C1_05270C_A:C1_05360C_A:C1_05380C_A:RSM22:RPS27A:FAL1:C1_05650W_A:RAD10:C1_06540C_A:NOP6:C1_06760C_A:RIA1:C1_07340W_A:C1_07470C_A:LHP1:C1_07510W_A:C1_07660W_A:ADE4:ECO1:ADE5,7:MRPL3:ERD1:C1_07950C_A:C1_07960W_A:FUN12:CAT8:MLT1:DIP2:SAM4:GCR3:GCD6:C1_08630W_A:MSS116:C1_08890C_A:CEF1:C1_09390W_A:GUA1:C1_09710C_A:C1_09790C_A:BUD31:PDC2:DBP3:MNN23:C1_10080W_A:FCY23:C1_10620W_A:APN2:RPA190:C1_10920W_A:C1_10950C_A:C1_10970W_A:C1_11000C_A:PET127:NEP1:KRR1:GAR1:C1_11790W_A:MUP1:C1_11900C_A:C1_11910W_A:TRP3:C1_12280C_A:CSI2:C1_12350W_A:WRS1:C1_12440W_A:C1_12570C_A:C1_12630C_A:C1_12670C_A:C1_12750C_A:C1_12760W_A:C1_12820C_A:REX3:RMP1:C1_13380W_A:MCU1:C1_13560W_A:C1_13820C_A:C1_14080W_A:C1_14330W_A:MPP10:FAV3:C2_00200W_A:C2_00280C_A:C2_00410C_A:C2_00820W_A:C2_00840W_A:C2_01070W_A:C2_01220W_A:C2_01240C_A:ESC4:C2_01420C_A:APT1:REX2:C2_01820C_A:PRP39:C2_01860C_A:C2_01870C_A:C2_02120W_A:C2_02420C_A:UTP21:UTP22:PRS1:C2_02540W_A:C2_02630W_A:PDR17:MET1:BNA31:PRP3:SCH9:C2_04120C_A:TBF1:SUV3:RIM2:C2_04570W_A:SNU114:C2_04700C_A:C2_04820W_A:PZF1:CKA2:C2_04990W_A:C2_05050C_A:C2_05080C_A:MAK5:C2_05160C_A:CDC21:RPF2:RPC40:KTI11:C2_05670C_A:C2_05750W_A:C2_05830C_A:C2_05840W_A:LAS1:CSM3:ECM17:SER1:MAK16:C2_06480W_A:C2_06520C_A:C2_06530W_A:VAS1:C2_06650C_A:C2_06660W_A:FHL1:C2_06850W_A:AAH1:NOC4:C2_07360W_A:RCL1:PRS5:C2_07920W_A:NSA1:C2_08180C_A:EAF3:RRP8:C2_08530C_A:MSU1:UTP15:MFG1:CDC47:C2_09160W_A:C2_09180W_A:MED18:C2_09310C_A:PES1:TAZ1:RRP15:C2_09500W_A:C2_09660W_A:SMM1:C2_09920W_A:CWC22:UBP8:PUS7:C2_10740C_A:RPC11:C2_10810W_A:RPS24:C3_00100W_A:ULP3:UTP8:BUD21:SOF1:C3_00660W_A:C3_00830C_A:BMS1:ARP9:UTP20:NCE103:C3_01310W_A:URA3:RKI1:C3_01560W_A:SCM3:C3_02020W_A:C3_02040C_A:UTP4:ILV2:C3_02350W_A:DDC1:C3_02670W_A:SMC3:C3_02750W_A:C3_02840W_A:C3_02850C_A:C3_03070W_A:C3_03110W_A:C3_03330C_A:HBR3:RAD53:C3_04370C_A:C3_04380C_A:ADE2:MAK21:ARV1:SFP1:NOP14:CEM1:C3_05140C_A:C3_05160C_A:WOR2:RPL8B:C3_05280C_A:C3_05380W_A:C3_05440C_A:QDR2:C3_05800W_A:C3_05860C_A:TRM12:C3_05900W_A:CTA4:NOG1:C3_06150W_A:MMS21:C3_06270C_A:DOT1:ISW2:C3_06370C_A:NSA2:C3_06630W_A:PRP5:NOP13:C3_07400W_A:C3_07550C_A:C3_07570C_A:RIT1:RAD4:UTP9:C3_07800C_A:DUR4:RLP24:NMD5:C4_00690C_A:C4_00700C_A:C4_00740W_A:MLH1:C4_00800W_A:C4_00810C_A:C4_00880W_A:C4_00940W_A:RAT1:C4_0 |
|------|--------------------------------------------------|------------------------------|------------------------------------------|----------|-------|--------------------------------------------------------------------------------------------------------------------------------------------------------------------------------------------------------------------------------------------------------------------------------------------------------------------------------------------------------------------------------------------------------------------------------------------------------------------------------------------------------------------------------------------------------------------------------------------------------------------------------------------------------------------------------------------------------------------------------------------------------------------------------------------------------------------------------------------------------------------------------------------------------------------------------------------------------------------------------------------------------------------------------------------------------------------------------------------------------------------------------------------------------------------------------------------------------------------------------------------------------------------------------------------------------------------------------------------------------------------------------------------------------------------------------------------------------------------------------------------------------------------------------------------------------------------------------------------------------------------------------------------------------------------------------------------------------------------------------------------------------------------------------------------------------------------------------------------------------------------------------------------------------------------------------------------------------------------------------------------------------------------------------------------------------------------------------------------------------------------------------------------------------------------------------------------------------------------------------------------------------------------------------------------------------------------------------------------------------------------------------------------------------------------------------------------------------------------------------------------------------------------------------------------------------------------------------------------------------------------------------------------------------------|

|  |  |  |  |  |  |                                                                                                                                                                                                                                                                                                                                                                                                                                                                                                                                                                                                                                                                                                                                                                                                                                                                                                                                                                                                                                                                                                                                                                                                                                                                                                                                                                                                                                                                                                                                                                                                                                                                                                                                                                                                                                                                                                                                                                                                                                                                                                                                                                                                                                                                                                                                                                                 |
|--|--|--|--|--|--|---------------------------------------------------------------------------------------------------------------------------------------------------------------------------------------------------------------------------------------------------------------------------------------------------------------------------------------------------------------------------------------------------------------------------------------------------------------------------------------------------------------------------------------------------------------------------------------------------------------------------------------------------------------------------------------------------------------------------------------------------------------------------------------------------------------------------------------------------------------------------------------------------------------------------------------------------------------------------------------------------------------------------------------------------------------------------------------------------------------------------------------------------------------------------------------------------------------------------------------------------------------------------------------------------------------------------------------------------------------------------------------------------------------------------------------------------------------------------------------------------------------------------------------------------------------------------------------------------------------------------------------------------------------------------------------------------------------------------------------------------------------------------------------------------------------------------------------------------------------------------------------------------------------------------------------------------------------------------------------------------------------------------------------------------------------------------------------------------------------------------------------------------------------------------------------------------------------------------------------------------------------------------------------------------------------------------------------------------------------------------------|
|  |  |  |  |  |  | 1280C_A:PWP1:C4_01500W_A:TOA2:ZCF25:C4_02400C_A:SLX4:HIT1:C4_02770C_A:SAS10:RPC53:HCA4:C4_02850W_A:ZUO1:C4_02880C_A:NAN1:C4_03140C_A:C4_03170W_A:DAO2:RAD2:C4_03720C_A:C4_03730C_A:C4_03740W_A:NUP84:C4_03830W_A:RRP42:C4_03870C_A:RAM1:ECM1:DUO1:C4_04520W_A:SSZ1:BAS1:C4_04810C_A:AGP3:RPL30:C4_05230C_A:C4_05260W_A:C4_05360C_A:OFD1:C4_05650W_A:C4_06210C_A:C4_06410W_A:NOP1:C4_06790W_A:C4_06950W_A:C4_07060W_A:C4_07150W_A:C5_00260W_A:C5_00280C_A:DUS4:MRP17:EXO1:RMT2:C5_00920W_A:BUD23:CYC3:C5_01140C_A:PUS4:C5_01430C_A:FYV5:SPB4:C5_01610W_A:C5_01930W_A:C5_02010C_A:C5_02070C_A:RIX7:PDE1:C5_02440C_A:TIF5:SPR28:UTP13:BUR2:CKB2:MSW1:C5_03010W_A:RMS1:RPO26:FUR1:C5_03400C_A:HAM1:C5_03920C_A:C5_04120C_A:SAH1:URA7:MSM1:HYS2:HAS1:C5_04840C_A:C5_04910W_A:GRF10:C5_05340W_A:DNA2:NOP5:C6_00530C_A:FCA1:C6_00640C_A:CDC14:TOP1:C6_01040C_A:C6_01120C_A:CIC1:RAD18:C6_01890C_A:SWD3:C6_02230W_A:ALG11:C6_02290C_A:C6_02300C_A:C6_02350C_A:C6_02430W_A:PRP45:C6_02690C_A:MRT4:C6_02900C_A:POP4:C6_03210C_A:ARP4:C6_03380W_A:C6_03390W_A:C6_03440W_A:NAM2:SPB1:C6_04240W_A:NOP8:ILS1:C6_04530C_A:C7_00160C_A:C7_00220W_A:C7_00330C_A:DCC1:PSF3:THG1:RPA135:NOP15:C7_01030C_A:DBP7:C7_01210C_A:C7_01270C_A:PSF1:C7_01360C_A:C7_01400C_A:GIR2:FLU1:C7_01570C_A:SMC6:C7_01950W_A:LIG1:C7_02340C_A:C7_02460C_A:C7_02660C_A:C7_02930C_A:C7_03400C_A:ISY1:ENP2:C7_03590C_A:ENP1:C7_03850W_A:C7_03880C_A:C7_04150W_A:UTP18:MMS22:RTT109:CR_00430C_A:CR_00460C_A:ADE1:BUD22:PWP2:CR_00830W_A:TRM1:DAL81:CTF18:CR_01320C_A:CR_01410C_A:PRS:CR_01550C_A:CR_01600C_A:MET6:CR_01670W_A:CDC60:CR_01700C_A:CR_01710W_A:CR_01780W_A:CR_01950W_A:CR_02030C_A:MCM6:CR_02420W_A:CR_02550C_A:RRP9:RPC31:CR_02890C_A:SRP40:ARC1:SMC5:CR_03110W_A:CR_03200C_A:CR_03230W_A:CR_03340C_A:CR_03360W_A:KTI12:CR_03400W_A:CR_03440W_A:NCS2:YVH1:SGD1:SMC1:PRP42:CR_03940W_A:CR_04110W_A:CR_04160C_A:CR_04170W_A:CR_04240C_A:CR_04300W_A:CR_04500C_A:CR_04560C_A:CR_04710W_A:ADE6:RPB8:NOC2:CR_05550C_A:RNR3:MTG2:DBP8:RFX1:RPL7:CR_06230W_A:FGR50:CR_06450W_A:RRN11:CR_06680C_A:NMD3:CR_06840W_A:CR_06970C_A:POL2:MIS11:CR_07030C_A:URA2:CR_07310W_A:PIF1:FUN30:CR_07640C_A:CDC45:DBP6:IMP4:CR_08000C_A:NOP10:SSB1:RIO2:ATS1:CR_08330W_A:CR_08410W_A:TSR1:CR_08940W_A:MPS1:SSF1:CR_09740W_A:MED21:CR_09800C_A:DPB2:SIK1:CR_10180W_A:UTP5:CR_10260W_A:CR_10410C_A:CR_10470C_A:MCD1:DRS1:LTV1:POP3 |
|--|--|--|--|--|--|---------------------------------------------------------------------------------------------------------------------------------------------------------------------------------------------------------------------------------------------------------------------------------------------------------------------------------------------------------------------------------------------------------------------------------------------------------------------------------------------------------------------------------------------------------------------------------------------------------------------------------------------------------------------------------------------------------------------------------------------------------------------------------------------------------------------------------------------------------------------------------------------------------------------------------------------------------------------------------------------------------------------------------------------------------------------------------------------------------------------------------------------------------------------------------------------------------------------------------------------------------------------------------------------------------------------------------------------------------------------------------------------------------------------------------------------------------------------------------------------------------------------------------------------------------------------------------------------------------------------------------------------------------------------------------------------------------------------------------------------------------------------------------------------------------------------------------------------------------------------------------------------------------------------------------------------------------------------------------------------------------------------------------------------------------------------------------------------------------------------------------------------------------------------------------------------------------------------------------------------------------------------------------------------------------------------------------------------------------------------------------|

|       |                               |                              |                                          |          |       |                                                                                                                                                                                                                                                                                                                                                                                                                                                                                                                                                                                                                                                                                                                                                                                                                                                                                                                                                                                                                                                                                                                                                                                                                                                                                                                                                                                                                                                                                                                                                                                                                                                                                                                                                                                                                                                                                                                                                                                                                                                                                                                                                                                                                                                                                                                                                                                                                                                                                                                                                                                                                                                             |
|-------|-------------------------------|------------------------------|------------------------------------------|----------|-------|-------------------------------------------------------------------------------------------------------------------------------------------------------------------------------------------------------------------------------------------------------------------------------------------------------------------------------------------------------------------------------------------------------------------------------------------------------------------------------------------------------------------------------------------------------------------------------------------------------------------------------------------------------------------------------------------------------------------------------------------------------------------------------------------------------------------------------------------------------------------------------------------------------------------------------------------------------------------------------------------------------------------------------------------------------------------------------------------------------------------------------------------------------------------------------------------------------------------------------------------------------------------------------------------------------------------------------------------------------------------------------------------------------------------------------------------------------------------------------------------------------------------------------------------------------------------------------------------------------------------------------------------------------------------------------------------------------------------------------------------------------------------------------------------------------------------------------------------------------------------------------------------------------------------------------------------------------------------------------------------------------------------------------------------------------------------------------------------------------------------------------------------------------------------------------------------------------------------------------------------------------------------------------------------------------------------------------------------------------------------------------------------------------------------------------------------------------------------------------------------------------------------------------------------------------------------------------------------------------------------------------------------------------------|
| 46483 | heterocycle metabolic process | 581 out of 1061 genes, 54.8% | 1733 out of 6473 background genes, 26.8% | 4.93E-98 | 0.00% | RIM8:HBR1:CNS1:RPO41:NRM1:RRS1:TRI1:HMT1:C1_01150C_A:C1_01160C_A:TRM2:C1_01530C_A:C1_02090C_A:ABP140:C1_02380C_A:C1_02390W_A:C1_02450C_A:SNZ1:SNO1:PDE2:C1_02900C_A:TSR2:C1_03260W_A:C1_03370W_A:C1_03630W_A:RPP1:C1_03830C_A:C1_04040C_A:C1_04120C_A:ERB1:NOP4:C1_04510W_A:C1_04530C_A:C1_04710C_A:C1_04970W_A:RRP6:REI1:TRY2:C1_05220C_A:C1_05270C_A:C1_05360C_A:C1_05380C_A:RSM22:RPS27A:FAL1:C1_05650W_A:RAD10:BUD16:C1_06540C_A:NOP6:C1_06760C_A:RIA1:YMC1:C1_07340W_A:C1_07470C_A:LHP1:C1_07510W_A:C1_07660W_A:ADE4:ECO1:ADE5,7:MRPL3:ERD1:C1_07950C_A:C1_07960W_A:FUN12:CAT8:MLT1:DIP2:SAM4:GCR3:GCD6:C1_08630W_A:MSS116:C1_08890C_A:CEF1:C1_09390W_A:GUA1:C1_09710C_A:C1_09790C_A:BUD31:PDC2:DBP3:MNN23:C1_10080W_A:FCY23:C1_10620W_A:APN2:RPA190:C1_10920W_A:C1_10950C_A:C1_10970W_A:C1_11000C_A:PET127:NEP1:KRR1:GAR1:C1_11790W_A:MUP1:C1_11900C_A:C1_11910W_A:TRP3:C1_12280C_A:CSI2:C1_12350W_A:WRS1:C1_12440W_A:C1_12570C_A:C1_12630C_A:C1_12670C_A:C1_12750C_A:C1_12760W_A:C1_12820C_A:REX3:RMP1:C1_13380W_A:MCU1:C1_13560W_A:C1_13820C_A:C1_14080W_A:C1_14330W_A:MPP10:FAV3:C2_00200W_A:C2_00280C_A:C2_00410C_A:C2_00820W_A:C2_00840W_A:C2_01070W_A:C2_01220W_A:C2_01240C_A:ESC4:C2_01420C_A:APT1:REX2:C2_01820C_A:PRP39:C2_01860C_A:C2_01870C_A:C2_02120W_A:C2_02420C_A:UTP21:UTP22:PRS1:C2_02540W_A:C2_02630W_A:PDR17:MET1:BNA31:PRP3:SCH9:C2_04120C_A:TBF1:SUV3:RIM2:C2_04570W_A:SNU114:C2_04700C_A:C2_04820W_A:PZF1:CKA2:C2_04990W_A:C2_05050C_A:C2_05080C_A:MAK5:C2_05160C_A:CDC21:RPF2:RPC40:KTI11:C2_05670C_A:C2_05750W_A:C2_05830C_A:C2_05840W_A:LAS1:CSM3:ECM17:SER1:MAK16:C2_06480W_A:C2_06520C_A:C2_06530W_A:VAS1:C2_06650C_A:C2_06660W_A:FHL1:C2_06850W_A:AAH1:NOC4:C2_07360W_A:RCL1:PRS5:C2_07920W_A:NSA1:C2_08180C_A:EAF3:RRP8:C2_08530C_A:MSU1:UTP15:MFG1:CDC47:C2_09160W_A:C2_09180W_A:MED18:C2_09310C_A:PES1:TAZ1:RRP15:C2_09500W_A:C2_09660W_A:SMM1:C2_09920W_A:CWC22:UBP8:PUS7:HEM3:C2_10740C_A:RPC11:C2_10810W_A:RPS24:C3_00100W_A:ULP3:UTP8:BUD21:SOF1:C3_00660W_A:C3_00830C_A:BMS1:ARP9:UTP20:NCE103:C3_01310W_A:URA3:RKI1:C3_01560W_A:SCM3:C3_02020W_A:C3_02040C_A:UTP4:ILV2:C3_02350W_A:DDC1:C3_02670W_A:SMC3:C3_02750W_A:C3_02840W_A:C3_02850C_A:C3_03070W_A:C3_03110W_A:C3_03330C_A:YAH1:HBR3:RAD53:C3_04370C_A:C3_04380C_A:ADE2:MAK21:ARV1:SFP1:NOP14:CEM1:C3_05140C_A:C3_05160C_A:WOR2:RPL8B:C3_05280C_A:C3_05380W_A:C3_05440C_A:QDR2:C3_05800W_A:C3_05860C_A:TRM12:C3_05900W_A:CTA4:NOG1:C3_06150W_A:MS21:C3_06270C_A:DOT1:ISW2:C3_06370C_A:NSA2:C3_06630W_A:PRP5:NOP13:C3_07400W_A:C3_07550C_A:C3_07570C_A:RIT1:RAD4:UTP9:C3_07800C_A:DUR4:RLP24:NMD5:C4_00690C_A:C4_00700C_A:C4_00740W_A:MLH1:C4_00800W_A:C4_0 |
|-------|-------------------------------|------------------------------|------------------------------------------|----------|-------|-------------------------------------------------------------------------------------------------------------------------------------------------------------------------------------------------------------------------------------------------------------------------------------------------------------------------------------------------------------------------------------------------------------------------------------------------------------------------------------------------------------------------------------------------------------------------------------------------------------------------------------------------------------------------------------------------------------------------------------------------------------------------------------------------------------------------------------------------------------------------------------------------------------------------------------------------------------------------------------------------------------------------------------------------------------------------------------------------------------------------------------------------------------------------------------------------------------------------------------------------------------------------------------------------------------------------------------------------------------------------------------------------------------------------------------------------------------------------------------------------------------------------------------------------------------------------------------------------------------------------------------------------------------------------------------------------------------------------------------------------------------------------------------------------------------------------------------------------------------------------------------------------------------------------------------------------------------------------------------------------------------------------------------------------------------------------------------------------------------------------------------------------------------------------------------------------------------------------------------------------------------------------------------------------------------------------------------------------------------------------------------------------------------------------------------------------------------------------------------------------------------------------------------------------------------------------------------------------------------------------------------------------------------|

|  |  |  |  |  |                                                                                                                                                                                                                                                                                                                                                                                                                                                                                                                                                                                                                                                                                                                                                                                                                                                                                                                                                                                                                                                                                                                                                                                                                                                                                                                                                                                                                                                                                                                                                                                                                                                                                                                                                                                                                                                                                                                                                                                                                                                                                                                                                                                                                                                                                                                                                                                                                                                                                  |
|--|--|--|--|--|----------------------------------------------------------------------------------------------------------------------------------------------------------------------------------------------------------------------------------------------------------------------------------------------------------------------------------------------------------------------------------------------------------------------------------------------------------------------------------------------------------------------------------------------------------------------------------------------------------------------------------------------------------------------------------------------------------------------------------------------------------------------------------------------------------------------------------------------------------------------------------------------------------------------------------------------------------------------------------------------------------------------------------------------------------------------------------------------------------------------------------------------------------------------------------------------------------------------------------------------------------------------------------------------------------------------------------------------------------------------------------------------------------------------------------------------------------------------------------------------------------------------------------------------------------------------------------------------------------------------------------------------------------------------------------------------------------------------------------------------------------------------------------------------------------------------------------------------------------------------------------------------------------------------------------------------------------------------------------------------------------------------------------------------------------------------------------------------------------------------------------------------------------------------------------------------------------------------------------------------------------------------------------------------------------------------------------------------------------------------------------------------------------------------------------------------------------------------------------|
|  |  |  |  |  | 0810C_A:C4_00880W_A:C4_00940W_A:RAT1:C4_01280C_A:PWP1:C4_01500W_A:TOA2:ZCF25:C4_02400C_A:SLX4:HIT1:C4_02770C_A:SAS10:RPC53:HCA4:C4_02850W_A:ZUO1:C4_02880C_A:NAN1:C4_03140C_A:C4_03170W_A:DAO2:RAD2:C4_03720C_A:C4_03730C_A:C4_03740W_A:NUP84:C4_03830W_A:RRP42:C4_03870C_A:RAM1:ECM1:DUO1:C4_04520W_A:SSZ1:BAS1:C4_04810C_A:AGP3:RPL30:C4_05230C_A:C4_05260W_A:C4_05360C_A:OFD1:C4_05650W_A:TRP5:C4_06210C_A:C4_06410W_A:NOP1:C4_06790W_A:C4_06950W_A:C4_07060W_A:TRP4:C4_07150W_A:C5_00260W_A:C5_00280C_A:DUS4:MRP17:EXO1:RMT2:C5_00920W_A:BUD23:CYC3:C5_01140C_A:PUS4:C5_01430C_A:FYV5:SPB4:C5_01610W_A:C5_01930W_A:C5_02010C_A:C5_02070C_A:RIX7:PDE1:C5_02440C_A:TIF5:SPR28:UTP13:BUR2:CKB2:MSW1:C5_03010W_A:RMS1:RPO26:FUR1:C5_03400C_A:C5_03840W_A:HAM1:C5_03920C_A:C5_04120C_A:SAH1:URA7:MSM1:C5_04720C_A:HYS2:HAS1:C5_04840C_A:C5_04910W_A:GRF10:C5_05340W_A:DNA2:NOP5:C6_00530C_A:FCA1:C6_00640C_A:CDC14:TOP1:C6_01040C_A:C6_01120C_A:CIC1:RAD18:C6_01890C_A:SWD3:C6_02230W_A:ALG11:C6_02290C_A:C6_02300C_A:C6_02350C_A:C6_02430W_A:PRP45:C6_02690C_A:MRT4:C6_02900C_A:POP4:C6_03210C_A:ARP4:C6_03380W_A:C6_03390W_A:C6_03440W_A:NAM2:SPB1:C6_04240W_A:NOP8:ILS1:C6_04530C_A:C7_00160C_A:C7_00220W_A:C7_00330C_A:DCC1:PSF3:THG1:RPA135:NOP15:C7_01030C_A:DBP7:C7_01210C_A:C7_01270C_A:PSF1:C7_01360C_A:C7_01400C_A:GIR2:FLU1:C7_01570C_A:SMC6:C7_01950W_A:LIG1:C7_02340C_A:C7_02460C_A:C7_02660C_A:C7_02930C_A:C7_03400C_A:ISY1:ENP2:C7_03590C_A:ENP1:C7_03850W_A:C7_03880C_A:C7_04150W_A:UTP18:MIS12:MMS22:RTT109:CR_00430C_A:CR_00460C_A:ADE1:BUD22:PWP2:CR_00830W_A:TRM1:DAL81:CTF18:CR_01320C_A:CR_01410C_A:PRS:CR_01550C_A:TRP2:CR_01600C_A:MET6:CR_01670W_A:CDC60:CR_0170C_A:CR_01710W_A:CR_01780W_A:CR_01950W_A:CR_02030C_A:MCM6:CR_02420W_A:CR_02550C_A:RRP9:RPC31:CR_02890C_A:SRP40:ARC1:SMC5:CR_03110W_A:CR_03200C_A:CR_03230W_A:CR_03340C_A:CR_03360W_A:KTI12:CR_03400W_A:CR_03440W_A:NCS2:YVH1:SGD1:SMC1:PRP42:CR_03940W_A:CR_04110W_A:CR_04160C_A:CR_04170W_A:CR_04240C_A:CR_04300W_A:CR_04500C_A:CR_04560C_A:CR_04710W_A:ADE6:RPB8:CR_04920W_A:NOC2:CR_05550C_A:RNR3:MTG2:DBP8:RFX1:RPL7:CR_06230W_A:FGR50:CR_06450W_A:RRN11:CR_06680C_A:NMD3:CR_06840W_A:CR_06970C_A:POL2:MIS11:CR_07030C_A:URA2:CR_07310W_A:PIF1:FUN30:CR_07640C_A:CDC45:DBP6:IMP4:CR_08000C_A:NOP10:SSB1:RIO2:ATS1:CR_08330W_A:CR_08410W_A:TSR1:CR_08940W_A:MPS1:SSF1:CR_09740W_A:MED21:CR_09800C_A:DPB2:SIK1:CR_10180W_A:UTP5:CR_10260W_A:CR_10410C_A:CR_10470C_A:MCD1:DRS1:LTV1:POP3 |
|--|--|--|--|--|----------------------------------------------------------------------------------------------------------------------------------------------------------------------------------------------------------------------------------------------------------------------------------------------------------------------------------------------------------------------------------------------------------------------------------------------------------------------------------------------------------------------------------------------------------------------------------------------------------------------------------------------------------------------------------------------------------------------------------------------------------------------------------------------------------------------------------------------------------------------------------------------------------------------------------------------------------------------------------------------------------------------------------------------------------------------------------------------------------------------------------------------------------------------------------------------------------------------------------------------------------------------------------------------------------------------------------------------------------------------------------------------------------------------------------------------------------------------------------------------------------------------------------------------------------------------------------------------------------------------------------------------------------------------------------------------------------------------------------------------------------------------------------------------------------------------------------------------------------------------------------------------------------------------------------------------------------------------------------------------------------------------------------------------------------------------------------------------------------------------------------------------------------------------------------------------------------------------------------------------------------------------------------------------------------------------------------------------------------------------------------------------------------------------------------------------------------------------------------|

|       |                               |                              |                                          |          |       |                                                                                                                                                                                                                                                                                                                                                                                                                                                                                                                                                                                                                                                                                                                                                                                                                                                                                                                                                                                                                                                                                                                                                                                                                                                                                                                                                                                                                                                                                                                                                                                                                                                                                                                                                                                                                                                                                                                                                                                                                                                                                                                                                                                                                                                                                                                                                                                                                                                                                                                                                                                                                                                                |
|-------|-------------------------------|------------------------------|------------------------------------------|----------|-------|----------------------------------------------------------------------------------------------------------------------------------------------------------------------------------------------------------------------------------------------------------------------------------------------------------------------------------------------------------------------------------------------------------------------------------------------------------------------------------------------------------------------------------------------------------------------------------------------------------------------------------------------------------------------------------------------------------------------------------------------------------------------------------------------------------------------------------------------------------------------------------------------------------------------------------------------------------------------------------------------------------------------------------------------------------------------------------------------------------------------------------------------------------------------------------------------------------------------------------------------------------------------------------------------------------------------------------------------------------------------------------------------------------------------------------------------------------------------------------------------------------------------------------------------------------------------------------------------------------------------------------------------------------------------------------------------------------------------------------------------------------------------------------------------------------------------------------------------------------------------------------------------------------------------------------------------------------------------------------------------------------------------------------------------------------------------------------------------------------------------------------------------------------------------------------------------------------------------------------------------------------------------------------------------------------------------------------------------------------------------------------------------------------------------------------------------------------------------------------------------------------------------------------------------------------------------------------------------------------------------------------------------------------------|
| 44085 | cellular component biogenesis | 487 out of 1061 genes, 45.9% | 1340 out of 6473 background genes, 20.7% | 1.15E-90 | 0.00% | HBR1:CNS1:RPO41:NRM1:RRS1:TRI1:C1_01160C_A:C1_02090C_A:ABP140:C1_02380C_A:C1_02450C_A:PDE2:C1_02900C_A:TSR2:ARX1:C1_03630W_A:C1_03790C_A:RPP1:C1_03830C_A:C1_04040C_A:C1_04120C_A:ERB1:NOP4:C1_04510W_A:C1_04710C_A:C1_04970W_A:RRP6:REI1:TRY2:C1_05220C_A:C1_05360C_A:C1_05380C_A:RSM22:RPS27A:FAL1:C1_05650W_A:C1_06530C_A:C1_06540C_A:NOP6:C1_06760C_A:RIA1:C1_07510W_A:C1_07660W_A:ERD1:C1_07950C_A:C1_07960W_A:FUN12:MLT1:DIP2:GCR3:GCD6:C1_08630W_A:MSS116:JIP5:NAR1:C1_09040C_A:CEF1:C1_09390W_A:YTM1:C1_09620C_A:C1_09710C_A:C1_09790C_A:PDC2:DBP3:MNN23:FCY23:C1_10620W_A:RPA190:C1_10920W_A:C1_10950C_A:C1_10970W_A:C1_11000C_A:NEP1:KRR1:GAR1:MUP1:C1_11900C_A:C1_11910W_A:TRP3:C1_12280C_A:CSL2:C1_12350W_A:C1_12440W_A:C1_12570C_A:C1_12630C_A:C1_12640W_A:C1_12680W_A:C1_12750C_A:C1_12760W_A:C1_12820C_A:C1_13010W_A:REX3:RMP1:C1_13370W_A:C1_13380W_A:COX19:MCU1:C1_13820C_A:C1_14080W_A:C1_14330W_A:MPP10:FAV3:C2_00200W_A:C2_00280C_A:C2_00410C_A:C2_00810C_A:C2_00820W_A:C2_00840W_A:C2_01070W_A:C2_01220W_A:C2_01420C_A:REX2:C2_01820C_A:PRP39:C2_01860C_A:C2_02120W_A:SAM37:C2_02420C_A:UTP21:UTP22:PRS1:C2_02540W_A:C2_02630W_A:PDR17:MET1:SMP3:PRP3:MNN42:SCH9:C2_04120C_A:TBF1:SUV3:RIM2:C2_04570W_A:SNU114:C2_04700C_A:C2_04820W_A:PZF1:CKA2:C2_05050C_A:C2_05080C_A:MAK5:C2_05160C_A:SGO1:RPF2:C2_05670C_A:C2_05750W_A:C2_05830C_A:C2_05840W_A:LAS1:ECM17:MAK16:C2_06520C_A:C2_06530W_A:C2_06650C_A:C2_06660W_A:RPL11:FHL1:C2_06850W_A:C2_06950C_A:NOC4:C2_07360W_A:RCL1:PRS5:C2_07920W_A:NSA1:KRE30:RPS10:C2_08180C_A:EAF3:RRP8:C2_08530C_A:MSU1:UTP15:MFG1:CDC47:C2_09160W_A:C2_09180W_A:C2_09290W_A:MED18:C2_09310C_A:PES1:TAZ1:RRP15:C2_09660W_A:SMM1:C2_09920W_A:CWC22:PUS7:C2_10740C_A:C2_10810W_A:RPS24:C3_00100W_A:UTP8:BUD21:SOF1:C3_00660W_A:C3_00830C_A:BMS1:ARP9:UTP20:NCE103:C3_01310W_A:RPS7A:C3_01560W_A:SCM3:C3_02020W_A:C3_02040C_A:UTP4:ILV2:C3_02350W_A:C3_02670W_A:SMC3:C3_02840W_A:C3_02850C_A:C3_03070W_A:C3_03110W_A:C3_03330C_A:YAH1:HBR3:C3_04370C_A:C3_04380C_A:MAK21:RPS15:ARV1:SFP1:NOP14:CEM1:C3_05160C_A:RPL8B:C3_05280C_A:C3_05380W_A:C3_05440C_A:QDR2:C3_05800W_A:C3_05860C_A:C3_05900W_A:NOG1:C3_06150W_A:DOT1:ISW2:C3_06370C_A:NSA2:C3_06600C_A:PRP5:NOP13:C3_07550C_A:C3_07570C_A:RAD4:UTP9:C3_07800C_A:DUR4:RLP24:NMD5:C4_00690C_A:C4_00740W_A:C4_00800W_A:C4_00810C_A:C4_00880W_A:RAT1:C4_01280C_A:PWP1:C4_01500W_A:TOA2:C4_02400C_A:SLX4:HIT1:C4_02770C_A:SAS10:RPC53:HCA4:ZUO1:C4_02880C_A:NAN1:C4_03140C_A:C4_03170W_A:DAO2:C4_03720C_A:C4_03740W_A:NUP84:C4_03830W_A:RRP42:RAM1:ECM1:C4_04130W_A:DUO1:C4_04520W_A:SSZ1:BAS1:C4_04820C_A:AGP3:RPL30:C4_05010W_A:C4_05230C_A:C4_05260W_A:C4_0 |
|-------|-------------------------------|------------------------------|------------------------------------------|----------|-------|----------------------------------------------------------------------------------------------------------------------------------------------------------------------------------------------------------------------------------------------------------------------------------------------------------------------------------------------------------------------------------------------------------------------------------------------------------------------------------------------------------------------------------------------------------------------------------------------------------------------------------------------------------------------------------------------------------------------------------------------------------------------------------------------------------------------------------------------------------------------------------------------------------------------------------------------------------------------------------------------------------------------------------------------------------------------------------------------------------------------------------------------------------------------------------------------------------------------------------------------------------------------------------------------------------------------------------------------------------------------------------------------------------------------------------------------------------------------------------------------------------------------------------------------------------------------------------------------------------------------------------------------------------------------------------------------------------------------------------------------------------------------------------------------------------------------------------------------------------------------------------------------------------------------------------------------------------------------------------------------------------------------------------------------------------------------------------------------------------------------------------------------------------------------------------------------------------------------------------------------------------------------------------------------------------------------------------------------------------------------------------------------------------------------------------------------------------------------------------------------------------------------------------------------------------------------------------------------------------------------------------------------------------------|

|  |  |  |  |  |  |                                                                                                                                                                                                                                                                                                                                                                                                                                                                                                                                                                                                                                                                                                                                                                                                                                                                                                                                                                                                                                                                                                                                                                                                                                                                                                                                                                                                                                                                                                                                                                                                                                                                                                                                             |
|--|--|--|--|--|--|---------------------------------------------------------------------------------------------------------------------------------------------------------------------------------------------------------------------------------------------------------------------------------------------------------------------------------------------------------------------------------------------------------------------------------------------------------------------------------------------------------------------------------------------------------------------------------------------------------------------------------------------------------------------------------------------------------------------------------------------------------------------------------------------------------------------------------------------------------------------------------------------------------------------------------------------------------------------------------------------------------------------------------------------------------------------------------------------------------------------------------------------------------------------------------------------------------------------------------------------------------------------------------------------------------------------------------------------------------------------------------------------------------------------------------------------------------------------------------------------------------------------------------------------------------------------------------------------------------------------------------------------------------------------------------------------------------------------------------------------|
|  |  |  |  |  |  | 5360C_A:TUB4:C4_05650W_A:C4_06210C_A:C4_06410W_A:NOP1:C4_06790W_A:C4_06950W_A:C4_07060W_A:C4_07150W_A:MRP17:RMT2:C5_00920W_A:BUD23:CYC3:PUS4:C5_01430C_A:FYV5:SPB4:C5_01930W_A:C5_02010C_A:C5_02070C_A:RIX7:C5_02440C_A:TIF5:SPR28:UTP13:BUR2:C5_02740W_A:CKB2:C5_03010W_A:RMS1:C5_03400C_A:C5_03920C_A:C5_04120C_A:C5_04720C_A:HAS1:C5_04840C_A:C5_04910W_A:GRF10:C5_05340W_A:NOP5:C6_00560W_A:CDC14:TOP1:C6_01040C_A:C6_01120C_A:CIC1:QDR3:TIF3:C6_01890C_A:SWD3:C6_02230W_A:RPL10A:ALG11:C6_02290C_A:C6_02430W_A:PRP45:MRT4:C6_02900C_A:POP4:C6_03210C_A:ARP4:C6_03380W_A:C6_03390W_A:C6_03440W_A:NOG2:SPB1:C6_04240W_A:NOP8:C7_00160C_A:C7_00220W_A:C7_00330C_A:THG1:RPA135:NOP15:C7_01030C_A:DBP7:C7_01210C_A:C7_01270C_A:C7_01360C_A:GIR2:FLU1:C7_01570C_A:C7_01600W_A:C7_01950W_A:LIG1:C7_02460C_A:C7_02660C_A:C7_02930C_A:C7_03400C_A:ISY1:ENP2:C7_03590C_A:ENP1:C7_03850W_A:C7_03880C_A:C7_04150W_A:UTP18:CR_00430C_A:CR_00460C_A:BUD22:PWP2:CR_00830W_A:DAL81:CR_01320C_A:CR_01410C_A:CR_01550C_A:CR_01600C_A:CR_01670W_A:CR_01700C_A:CR_01710W_A:CR_01780W_A:CR_02030C_A:MCM6:CR_02420W_A:CR_02550C_A:RRP9:CR_02890C_A:SRP40:ARC1:SMC5:CR_03200C_A:CR_03230W_A:CR_03340C_A:CR_03360W_A:KTI12:NCS2:YVH1:SGD1:SMC1:PRP42:CR_03940W_A:MEX67:CR_04110W_A:CR_04170W_A:QDR1:CR_04240C_A:CR_04500C_A:CR_04710W_A:NOC2:CR_05550C_A:RNR3:MTG2:DBP8:SDA1:RFX1:RPL7:CR_06230W_A:FGR50:CR_06450W_A:RRN11:HSP60:CR_06680C_A:NMD3:CR_06740W_A:CR_06840W_A:CR_06970C_A:POL2:CR_07030C_A:CR_07310W_A:PIF1:FUN30:CR_07640C_A:CDC45:DBP6:IMP4:CR_08000C_A:NOP10:SSB1:RIO2:ATS1:CR_08330W_A:CR_08410W_A:TSR1:CR_08500W_A:MPS1:ELF1:SSF1:CR_09740W_A:MED21:CR_09800C_A:DPB2:SIK1:CR_10180W_A:UTP5:CR_10260W_A:CR_10410C_A:CR_10470C_A:DRS1:LTV1:POP3 |
|--|--|--|--|--|--|---------------------------------------------------------------------------------------------------------------------------------------------------------------------------------------------------------------------------------------------------------------------------------------------------------------------------------------------------------------------------------------------------------------------------------------------------------------------------------------------------------------------------------------------------------------------------------------------------------------------------------------------------------------------------------------------------------------------------------------------------------------------------------------------------------------------------------------------------------------------------------------------------------------------------------------------------------------------------------------------------------------------------------------------------------------------------------------------------------------------------------------------------------------------------------------------------------------------------------------------------------------------------------------------------------------------------------------------------------------------------------------------------------------------------------------------------------------------------------------------------------------------------------------------------------------------------------------------------------------------------------------------------------------------------------------------------------------------------------------------|



|           |                                                       |                                       |                                                   |          |       |                                                                                                                                                                                                                                                                                                                                                                                                                                                                                                                                                                                                                                                                                                                                                                                                                                                                                                                                                                                                                                                                                                                                                                                                                                                                                                                                                                                                                                                                                                                                                                                                                                                                                                                                                                                                                                                                                                                                                                                                                                                                                                                                                                                                                                                                                                                                                                                                                                                                                                                                                                                                                                                               |
|-----------|-------------------------------------------------------|---------------------------------------|---------------------------------------------------|----------|-------|---------------------------------------------------------------------------------------------------------------------------------------------------------------------------------------------------------------------------------------------------------------------------------------------------------------------------------------------------------------------------------------------------------------------------------------------------------------------------------------------------------------------------------------------------------------------------------------------------------------------------------------------------------------------------------------------------------------------------------------------------------------------------------------------------------------------------------------------------------------------------------------------------------------------------------------------------------------------------------------------------------------------------------------------------------------------------------------------------------------------------------------------------------------------------------------------------------------------------------------------------------------------------------------------------------------------------------------------------------------------------------------------------------------------------------------------------------------------------------------------------------------------------------------------------------------------------------------------------------------------------------------------------------------------------------------------------------------------------------------------------------------------------------------------------------------------------------------------------------------------------------------------------------------------------------------------------------------------------------------------------------------------------------------------------------------------------------------------------------------------------------------------------------------------------------------------------------------------------------------------------------------------------------------------------------------------------------------------------------------------------------------------------------------------------------------------------------------------------------------------------------------------------------------------------------------------------------------------------------------------------------------------------------------|
| 3464<br>1 | cellular<br>nitrogen<br>compound<br>metabolic process | 671 out of<br>1061<br>genes,<br>63.2% | 2297 out of<br>6473<br>background genes,<br>35.5% | 1.26E-87 | 0.00% | RIM8:HBR1:C1_00510W_A:CNS1:RPO41:SPE1:NRM1:RRS1:TRI1:HMT1:C1_01150C_A:C1_01160C_A:TRM2:C1_01530C_A:C1_02090C_A:ABP140:C1_02380C_A:C1_02390W_A:C1_02450C_A:SNZ1:SNO1:HOM6:PDE2:MIA40:C1_02900C_A:C1_02970W_A:TSR2:C1_03260W_A:C1_03370W_A:C1_03540C_A:C1_03630W_A:RPP1:C1_03830C_A:C1_04040C_A:C1_04120C_A:ERB1:NOP4:C1_04510W_A:C1_04530C_A:C1_04710C_A:MRPL37:C1_04970W_A:RRP6:REI1:TRY2:C1_05220C_A:C1_05270C_A:C1_05360C_A:C1_05380C_A:RSM22:RPS27A:C1_05630C_A:FAL1:C1_05650W_A:RAD10:C1_05990C_A:BUD16:C1_06540C_A:NOP6:C1_06760C_A:RIA1:YMC1:C1_07340W_A:C1_07470C_A:LHP1:C1_07510W_A:C1_07660W_A:ADE4:ECO1:GCS1:ADE5,7:MRPL3:ERD1:C1_07950C_A:C1_07960W_A:FUN12:DRG1:CAT8:MLT1:DIP2:SAM4:GCR3:C1_08520C_A:GCD6:C1_08630W_A:MSS116:C1_08890C_A:CEF1:C1_09390W_A:GUA1:C1_09710C_A:C1_09790C_A:BUD31:C1_09910C_A:PDC2:DBP3:MNN23:C1_10080W_A:C1_10200C_A:FCY23:C1_10620W_A:APN2:RPA190:C1_10690W_A:C1_10920W_A:C1_10950C_A:C1_10970W_A:C1_11000C_A:PET127:FGR39:NEP1:KRR1:SAM2:GAR1:C1_11790W_A:MUP1:C1_11880W_A:C1_11900C_A:C1_11910W_A:SER33:TRP3:C1_12280C_A:CSI2:MRPS9:C1_12350W_A:WRS1:C1_12440W_A:C1_12570C_A:C1_12630C_A:C1_12670C_A:C1_12750C_A:C1_12760W_A:FEN1:C1_12820C_A:RPL14:C1_13060C_A:REX3:C1_13330C_A:RMP1:C1_13380W_A:AGC1:MCU1:C1_13560W_A:C1_13820C_A:C1_14080W_A:C1_14330W_A:MPP10:FAV3:C2_00200W_A:C2_00280C_A:C2_00410C_A:C2_00820W_A:C2_00840W_A:C2_01070W_A:C2_01220W_A:C2_01240C_A:ESC4:C2_01420C_A:APT1:REX2:C2_01740C_A:C2_01820C_A:PRP39:C2_01860C_A:C2_01870C_A:C2_02120W_A:C2_02270C_A:C2_02420C_A:UTP21:UTP22:PRS1:C2_02540W_A:C2_02630W_A:PDR17:C2_02930C_A:MET1:BNA31:SMMP3:PRP3:C2_03560C_A:SCH9:C2_03950W_A:C2_04120C_A:TBFI:SUV3:RIM2:C2_04570W_A:SNU114:C2_04700C_A:C2_04820W_A:PZF1:CKA2:C2_04990W_A:C2_05050C_A:C2_05080C_A:MAK5:C2_05160C_A:CDC21:RPF2:C2_05270W_A:RPC40:KTI11:C2_05670C_A:C2_05750W_A:C2_05830C_A:C2_05840W_A:IDP1:LAS1:CSM3:ECM17:SER1:MAK16:C2_06480W_A:C2_06520C_A:C2_06530W_A:VAS1:C2_06650C_A:C2_06660W_A:RPL11:FHL1:C2_06850W_A:C2_06950C_A:SPE3:AAH1:NOC4:C2_07360W_A:RCL1:C2_07680W_A:PRS5:C2_07920W_A:NSA1:C2_08180C_A:EAF3:RRP8:C2_08530C_A:MSU1:UTP15:MFG1:CDC47:C2_09160W_A:C2_09180W_A:MED18:C2_09310C_A:PES1:TAZ1:RRP15:C2_09500W_A:C2_09660W_A:SMM1:C2_09920W_A:CWC22:UBP8:PUS7:HEM3:C2_10740C_A:RPC11:C2_10810W_A:RPS24:C3_00100W_A:ULP3:UTP8:BUD21:SOF1:C3_00660W_A:C3_00830C_A:BMS1:ARP9:UTP20:NC103:C3_01310W_A:URA3:RKI1:RPS7A:C3_01520C_A:C3_01560W_A:SCM3:C3_02020W_A:C3_02040C_A:UTP4:ILV2:C3_02350W_A:DDC1:C3_02670W_A:SMC3:C3_02750W_A:C3_02840W_A:C3_02850C_A:C3_03070W_A:C3_03110W_A:C3_03330C_A:YAH1:HBR3:RAD53:C3_04370C_A:C3_04380C_A:ADE2:MAK21:RPS15:RPP2B:ARV |
|-----------|-------------------------------------------------------|---------------------------------------|---------------------------------------------------|----------|-------|---------------------------------------------------------------------------------------------------------------------------------------------------------------------------------------------------------------------------------------------------------------------------------------------------------------------------------------------------------------------------------------------------------------------------------------------------------------------------------------------------------------------------------------------------------------------------------------------------------------------------------------------------------------------------------------------------------------------------------------------------------------------------------------------------------------------------------------------------------------------------------------------------------------------------------------------------------------------------------------------------------------------------------------------------------------------------------------------------------------------------------------------------------------------------------------------------------------------------------------------------------------------------------------------------------------------------------------------------------------------------------------------------------------------------------------------------------------------------------------------------------------------------------------------------------------------------------------------------------------------------------------------------------------------------------------------------------------------------------------------------------------------------------------------------------------------------------------------------------------------------------------------------------------------------------------------------------------------------------------------------------------------------------------------------------------------------------------------------------------------------------------------------------------------------------------------------------------------------------------------------------------------------------------------------------------------------------------------------------------------------------------------------------------------------------------------------------------------------------------------------------------------------------------------------------------------------------------------------------------------------------------------------------------|

|  |  |  |  |  |                                                                                                                                                                                                                                                                                                                                                                                                                                                                                                                                                                                                                                                                                                                                                                                                                                                                                                                                                                                                                                                                                                                                                                                                                                                                                                                                                                                                                                                                                                                                                                                                                                                                                                                                                                                                                                                                                                                                                                                                                                                                                                                                                                                                                                                                                                                                                                                                                                                                                                                                                                                                                                                               |
|--|--|--|--|--|---------------------------------------------------------------------------------------------------------------------------------------------------------------------------------------------------------------------------------------------------------------------------------------------------------------------------------------------------------------------------------------------------------------------------------------------------------------------------------------------------------------------------------------------------------------------------------------------------------------------------------------------------------------------------------------------------------------------------------------------------------------------------------------------------------------------------------------------------------------------------------------------------------------------------------------------------------------------------------------------------------------------------------------------------------------------------------------------------------------------------------------------------------------------------------------------------------------------------------------------------------------------------------------------------------------------------------------------------------------------------------------------------------------------------------------------------------------------------------------------------------------------------------------------------------------------------------------------------------------------------------------------------------------------------------------------------------------------------------------------------------------------------------------------------------------------------------------------------------------------------------------------------------------------------------------------------------------------------------------------------------------------------------------------------------------------------------------------------------------------------------------------------------------------------------------------------------------------------------------------------------------------------------------------------------------------------------------------------------------------------------------------------------------------------------------------------------------------------------------------------------------------------------------------------------------------------------------------------------------------------------------------------------------|
|  |  |  |  |  | 1:SFP1:NOP14:CEM1:C3_05140C_A:C3_05160C_A:WOR2:RPL8B:C3_05280C_A:C3_05380W_A:C3_05440C_A:QDR2:C3_05800W_A:C3_05860C_A:TRM12:C3_05900W_A:CTA4:NOG1:C3_06150W_A:MMS21:C3_06240C_A:C3_06270C_A:DOT1:ISW2:C3_06370C_A:NSA2:C3_06630W_A:PRP5:C3_06830C_A:RPS12:NOP13:C3_07400W_A:C3_07550C_A:C3_07570C_A:RIT1:RAD4:UTP9:C3_07800C_A:DUR4:RLP24:NMD5:HIS5:C4_00690C_A:C4_00700C_A:C4_00740W_A:MLH1:C4_00800W_A:C4_00810C_A:C4_00880W_A:ARO1:C4_00940W_A:RAT1:C4_01280C_A:PGA53:PWP1:NIP1:C4_01500W_A:TOA2:HSX11:TIM10:ZCF25:C4_02400C_A:SLX4:HIT1:C4_02770C_A:SAS10:RPC53:HCA4:C4_02850W_A:ZUO1:C4_02880C_A:NAN1:C4_03140C_A:C4_03170W_A:DAO2:C4_03410W_A:RAD2:C4_03720C_A:C4_03730C_A:C4_03740W_A:NUP84:C4_03830W_A:RRP42:C4_03870C_A:RAM1:ECM1:C4_04130W_A:DUO1:C4_04390W_A:C4_04520W_A:SSZ1:BAS1:C4_04810C_A:AGP3:RPL30:C4_05230C_A:C4_05260W_A:C4_05360C_A:OFD1:C4_05650W_A:TRP5:C4_06210C_A:C4_06410W_A:NOP1:C4_06790W_A:C4_06950W_A:C4_07060W_A:TRP4:C4_07140W_A:C4_07150W_A:C5_00030W_A:C5_00260W_A:C5_00280C_A:DUS4:C5_00320W_A:MRP17:MET14:EXO1:RMT2:SPE2:C5_00820W_A:C5_00920W_A:BUD23:CYC3:C5_01140C_A:PUS4:C5_01430C_A:FYV5:SPB4:C5_01610W_A:C5_01700W_A:C5_01930W_A:C5_02010C_A:C5_02070C_A:RIX7:PDE1:C5_02440C_A:TIF5:SPR28:UTP13:C5_02590C_A:BUR2:CKB2:MSW1:C5_02780W_A:C5_02820C_A:C5_03010W_A:RMS1:CAM1-1:C5_03290C_A:RPO26:FUR1:C5_03400C_A:C5_03530C_A:C5_03840W_A:HAM1:C5_03920C_A:C5_04120C_A:SAH1:C5_04290C_A:URA7:CSU57:MSM1:C5_04720C_A:HYS2:HAS1:C5_04840C_A:C5_04910W_A:GRF10:C5_05250C_A:SDH4:C5_05340W_A:DNA2:NOP5:C6_00530C_A:FCA1:C6_00640C_A:CDC14:TOP1:C6_01040C_A:C6_01120C_A:CIC1:PMP1:TIF3:RAD18:C6_01890C_A:C6_01980C_A:SWD3:C6_02230W_A:RPL10A:ALG11:C6_02290C_A:C6_02300C_A:C6_02350C_A:C6_02370C_A:C6_02430W_A:PRP45:C6_02690C_A:MRT4:C6_02900C_A:POP4:C6_03210C_A:ARP4:C6_03380W_A:C6_03390W_A:C6_03440W_A:NAM2:SPB1:C6_04240W_A:NOP8:ILS1:C6_04530C_A:C7_00160C_A:C7_00220W_A:C7_00330C_A:DCC1:PSF3:THG1:RPA135:NOP15:YML6:C7_01020C_A:C7_01030C_A:DBP7:C7_01210C_A:ASC1:C7_01270C_A:PSF1:C7_01360C_A:C7_01400C_A:GIR2:PRT1:FLU1:C7_01570C_A:SMC6:C7_01600W_A:C7_01950W_A:LIG1:C7_02340C_A:C7_02460C_A:C7_02660C_A:C7_02930C_A:IFM1:C7_03400C_A:ISY1:ENP2:C7_03590C_A:ENP1:HIS7:MRP7:C7_03850W_A:C7_03880C_A:C7_04150W_A:UTP18:MIS12:MMS22:RTT109:CR_00430C_A:CR_00460C_A:MRPL6:ADE1:BUD22:PWP2:CR_00830W_A:TRM1:DAL81:CTF18:CR_01320C_A:CR_01410C_A:PRS:CR_01550C_A:TRP2:CR_01600C_A:MET6:CR_01670W_A:CDC60:CR_01700C_A:CR_01710W_A:CR_01780W_A:CR_01950W_A:CR_02030C_A:MCM6:ERG25:CR_02420W_A:CR_02430C_A:CR_02550C_A:PAN6:RRP9:RPC31:CR_02890C_A:SRP40:ARC1:SMC5:CR_03110W_A:CR_03200C_A:CR_03230W_A:CR_03340C_A:CR_033 |
|--|--|--|--|--|---------------------------------------------------------------------------------------------------------------------------------------------------------------------------------------------------------------------------------------------------------------------------------------------------------------------------------------------------------------------------------------------------------------------------------------------------------------------------------------------------------------------------------------------------------------------------------------------------------------------------------------------------------------------------------------------------------------------------------------------------------------------------------------------------------------------------------------------------------------------------------------------------------------------------------------------------------------------------------------------------------------------------------------------------------------------------------------------------------------------------------------------------------------------------------------------------------------------------------------------------------------------------------------------------------------------------------------------------------------------------------------------------------------------------------------------------------------------------------------------------------------------------------------------------------------------------------------------------------------------------------------------------------------------------------------------------------------------------------------------------------------------------------------------------------------------------------------------------------------------------------------------------------------------------------------------------------------------------------------------------------------------------------------------------------------------------------------------------------------------------------------------------------------------------------------------------------------------------------------------------------------------------------------------------------------------------------------------------------------------------------------------------------------------------------------------------------------------------------------------------------------------------------------------------------------------------------------------------------------------------------------------------------------|

|  |  |  |  |  |  |                                                                                                                                                                                                                                                                                                                                                                                                                                                                                                                                                                                                                           |
|--|--|--|--|--|--|---------------------------------------------------------------------------------------------------------------------------------------------------------------------------------------------------------------------------------------------------------------------------------------------------------------------------------------------------------------------------------------------------------------------------------------------------------------------------------------------------------------------------------------------------------------------------------------------------------------------------|
|  |  |  |  |  |  | 60W_A:KTI12:MTG1:CR_03400W_A:CR_03440W_A:NCS2:YVH1:SGD1:SMC1:PRP42:CR_03940W_A:CR_04110W_A:CR_04160C_A:CR_04170W_A:CR_04240C_A:CR_04300W_A:CR_04500C_A:CR_04560C_A:CR_04710W_A:ADE6:RPB8:CR_04920W_A:NOC2:CR_05550C_A:RNR3:MTG2:DBP8:RFX1:RPL7:CR_06230W_A:FGR50:CR_06450W_A:RRN11:CR_06680C_A:NMD3:CR_06840W_A:CR_06970C_A:POL2:MIS11:CR_07030C_A:URA2:CR_07310W_A:PIF1:FUN30:CR_07640C_A:CDC45:DBP6:IMP4:CR_0800C_A:NOP10:SSB1:RIO2:ATS1:CR_08330W_A:RPP2A:GSH2:CR_08410W_A:TSR1:CR_08940W_A:MPS1:SSF1:CR_09740W_A:MED21:CR_09800C_A:DPB2:SIK1:CR_10180W_A:UTP5:CR_10260W_A:CR_10410C_A:CR_10470C_A:MCD1:DRS1:LTV1:POP3 |
|--|--|--|--|--|--|---------------------------------------------------------------------------------------------------------------------------------------------------------------------------------------------------------------------------------------------------------------------------------------------------------------------------------------------------------------------------------------------------------------------------------------------------------------------------------------------------------------------------------------------------------------------------------------------------------------------------|

|       |                                           |                              |                                          |          |       |                                                                                                                                                                                                                                                                                                                                                                                                                                                                                                                                                                                                                                                                                                                                                                                                                                                                                                                                                                                                                                                                                                                                                                                                                                                                                                                                                                                                                                                                                                                                                                                                                                                                                                                                                                                                                                                                                                                                                                                                                                                                                                                                                                                                                                                                                                                                                                                                                                                                                                                                                                                                                                                              |
|-------|-------------------------------------------|------------------------------|------------------------------------------|----------|-------|--------------------------------------------------------------------------------------------------------------------------------------------------------------------------------------------------------------------------------------------------------------------------------------------------------------------------------------------------------------------------------------------------------------------------------------------------------------------------------------------------------------------------------------------------------------------------------------------------------------------------------------------------------------------------------------------------------------------------------------------------------------------------------------------------------------------------------------------------------------------------------------------------------------------------------------------------------------------------------------------------------------------------------------------------------------------------------------------------------------------------------------------------------------------------------------------------------------------------------------------------------------------------------------------------------------------------------------------------------------------------------------------------------------------------------------------------------------------------------------------------------------------------------------------------------------------------------------------------------------------------------------------------------------------------------------------------------------------------------------------------------------------------------------------------------------------------------------------------------------------------------------------------------------------------------------------------------------------------------------------------------------------------------------------------------------------------------------------------------------------------------------------------------------------------------------------------------------------------------------------------------------------------------------------------------------------------------------------------------------------------------------------------------------------------------------------------------------------------------------------------------------------------------------------------------------------------------------------------------------------------------------------------------------|
| 2E+06 | organic cyclic compound metabolic process | 597 out of 1061 genes, 56.3% | 1903 out of 6473 background genes, 29.4% | 4.81E-87 | 0.00% | RIM8:HBR1:CNS1:RPO41:NRM1:RRS1:TRI1:HMT1:C1_01150C_A:C1_01160C_A:TRM2:C1_01530C_A:C1_02090C_A:ABP140:CWH8:C1_02380C_A:C1_02390W_A:C1_02450C_A:SNZ1:SNO1:PDE2:C1_02900C_A:TSR2:C1_03260W_A:C1_03370W_A:C1_03630W_A:RPP1:C1_03830C_A:C1_04040C_A:C1_04120C_A:ERB1:NOP4:C1_04510W_A:C1_04530C_A:C1_04710C_A:C1_04970W_A:RRP6:REI1:TRY2:ARO4:C1_05220C_A:C1_05270C_A:C1_05360C_A:C1_05380C_A:RSM22:RPS27A:FAL1:C1_05650W_A:RAD10:BUD16:C1_06540C_A:NOP6:C1_06760C_A:RIA1:YMC1:C1_07340W_A:C1_07470C_A:LHP1:C1_07510W_A:C1_07660W_A:ADE4:ECO1:ADE5,7:MRPL3:ERD1:C1_07950C_A:C1_07960W_A:FUN12:CAT8:MLT1:DIP2:SAM4:GCR3:UPC2:GCD6:C1_08630W_A:MSS116:C1_08890C_A:CEF1:C1_09390W_A:GUA1:C1_09610W_A:C1_09710C_A:C1_09790C_A:BUD31:PDC2:DBP3:MNN23:C1_10080W_A:FCY23:C1_10620W_A:APN2:RPA190:C1_10920W_A:C1_10950C_A:C1_10970W_A:C1_11000C_A:PET127:NEP1:KRR1:GAR1:C1_11790W_A:MUP1:C1_11900C_A:C1_11910W_A:TRP3:C1_12280C_A:CSI2:C1_12350W_A:WRS1:C1_12440W_A:C1_12570C_A:C1_12630C_A:C1_12670C_A:C1_12750C_A:C1_12760W_A:C1_12820C_A:REX3:RMP1:C1_13380W_A:MCU1:C1_13560W_A:C1_13820C_A:C1_14080W_A:C1_14330W_A:MPP10:FAV3:C2_00200W_A:C2_00280C_A:C2_00410C_A:C2_00820W_A:C2_00840W_A:C2_01070W_A:C2_01220W_A:C2_01240C_A:ESC4:C2_01420C_A:APT1:REX2:C2_01820C_A:PRP39:C2_01860C_A:C2_01870C_A:ARO3:C2_02120W_A:C2_02420C_A:UTP21:UTP22:PRS1:C2_02540W_A:C2_02630W_A:PDR17:MET1:BNA31:PRP3:SCH9:C2_04120C_A:TBF1:SUV3:RIM2:C2_04570W_A:SNU114:C2_04700C_A:C2_04820W_A:PZF1:CKA2:C2_04990W_A:C2_05050C_A:C2_05080C_A:MAK5:C2_05160C_A:CDC21:RPF2:RPC40:KTI11:C2_05670C_A:C2_05750W_A:C2_05830C_A:C2_05840W_A:LAS1:CSM3:ECM17:SER1:MAK16:C2_06480W_A:C2_06520C_A:C2_06530W_A:VAS1:C2_06650C_A:C2_06660W_A:FHL1:C2_06850W_A:AAH1:NOC4:C2_07360W_A:RCL1:PRS5:C2_07920W_A:NSA1:C2_08180C_A:EAF3:RRP8:C2_08530C_A:MSU1:UTP15:MFG1:CD47:C2_09160W_A:C2_09180W_A:MED18:C2_09310C_A:PES1:TAZ1:RRP15:C2_09500W_A:C2_09660W_A:SMM1:C2_09920W_A:CWC22:UBP8:PUS7:HEM3:C2_10740C_A:RPC11:C2_10810W_A:RPS24:C3_00100W_A:ULP3:UTP8:BUD21:SOF1:C3_00660W_A:C3_00830C_A:BMS1:ARP9:UTP20:NCE103:C3_01310W_A:URA3:RKI1:C3_01560W_A:SCM3:C3_02020W_A:C3_02040C_A:UTP4:ILV2:C3_02350W_A:PHA2:DDC1:C3_02670W_A:SMC3:C3_02750W_A:C3_02840W_A:C3_02850C_A:C3_03070W_A:C3_03110W_A:C3_03330C_A:YAH1:HBR3:RAD53:C3_04370C_A:C3_04380C_A:ADE2:MAK21:ARV1:SFP1:NOP14:CEM1:C3_05140C_A:C3_05160C_A:WOR2:RPL8B:C3_05280C_A:C3_05380W_A:C3_05440C_A:QDR2:C3_05800W_A:C3_05860C_A:TRM12:C3_05900W_A:CTA4:NOG1:C3_06150W_A:MMS21:C3_06270C_A:DOT1:ISW2:C3_06370C_A:NSA2:C3_06630W_A:PRP5:NOP13:C3_07400W_A:C3_07550C_A:C3_07570C_A:RIT1:RAD4:UTP9:C3_07800C_A:DUR4:RLP24:NMD5:C4_00690C_A:C4_00700C |
|-------|-------------------------------------------|------------------------------|------------------------------------------|----------|-------|--------------------------------------------------------------------------------------------------------------------------------------------------------------------------------------------------------------------------------------------------------------------------------------------------------------------------------------------------------------------------------------------------------------------------------------------------------------------------------------------------------------------------------------------------------------------------------------------------------------------------------------------------------------------------------------------------------------------------------------------------------------------------------------------------------------------------------------------------------------------------------------------------------------------------------------------------------------------------------------------------------------------------------------------------------------------------------------------------------------------------------------------------------------------------------------------------------------------------------------------------------------------------------------------------------------------------------------------------------------------------------------------------------------------------------------------------------------------------------------------------------------------------------------------------------------------------------------------------------------------------------------------------------------------------------------------------------------------------------------------------------------------------------------------------------------------------------------------------------------------------------------------------------------------------------------------------------------------------------------------------------------------------------------------------------------------------------------------------------------------------------------------------------------------------------------------------------------------------------------------------------------------------------------------------------------------------------------------------------------------------------------------------------------------------------------------------------------------------------------------------------------------------------------------------------------------------------------------------------------------------------------------------------------|

|  |  |  |  |  |  |                                                                                                                                                                                                                                                                                                                                                                                                                                                                                                                                                                                                                                                                                                                                                                                                                                                                                                                                                                                                                                                                                                                                                                                                                                                                                                                                                                                                                                                                                                                                                                                                                                                                                                                                                                                                                                                                                                                                                                                                                                                                                                                                                                                                                                                                                                                                                                                                                                                                                                                                                                                       |
|--|--|--|--|--|--|---------------------------------------------------------------------------------------------------------------------------------------------------------------------------------------------------------------------------------------------------------------------------------------------------------------------------------------------------------------------------------------------------------------------------------------------------------------------------------------------------------------------------------------------------------------------------------------------------------------------------------------------------------------------------------------------------------------------------------------------------------------------------------------------------------------------------------------------------------------------------------------------------------------------------------------------------------------------------------------------------------------------------------------------------------------------------------------------------------------------------------------------------------------------------------------------------------------------------------------------------------------------------------------------------------------------------------------------------------------------------------------------------------------------------------------------------------------------------------------------------------------------------------------------------------------------------------------------------------------------------------------------------------------------------------------------------------------------------------------------------------------------------------------------------------------------------------------------------------------------------------------------------------------------------------------------------------------------------------------------------------------------------------------------------------------------------------------------------------------------------------------------------------------------------------------------------------------------------------------------------------------------------------------------------------------------------------------------------------------------------------------------------------------------------------------------------------------------------------------------------------------------------------------------------------------------------------------|
|  |  |  |  |  |  | <p>_A:C4_00740W_A:MLH1:C4_00800W_A:C4_00810C_A:C4_00880W_A:ARO1:C4_00940W_A:RAT1:C4_01280C_A:PWP1:C4_01500W_A:TOA2:ZCF25:C4_02400C_A:SLX4:HIT1:C4_02770C_A:SAS10:RPC53:HCA4:C4_02850W_A:ZUO1:C4_02880C_A:NAN1:C4_03140C_A:C4_03170W_A:DAO2:RAD2:C4_03720C_A:C4_03730C_A:C4_03740W_A:NUP84:C4_03830W_A:RRP42:C4_03870C_A:RAM1:ECM1:DUO1:C4_04520W_A:SSZ1:BAS1:C4_04810C_A:AGP3:RPL30:C4_05230C_A:C4_05260W_A:C4_05360C_A:OFD1:C4_05650W_A:TRP5:C4_06210C_A:C4_06410W_A:NOP1:C4_06790W_A:C4_06950W_A:C4_07060W_A:TRP4:C4_07150W_A:C5_00260W_A:C5_00280C_A:DUS4:MRP17:EXO1:RMT2:C5_00920W_A:BUD23:CYC3:C5_01140C_A:PUS4:C5_01430C_A:FYV5:SPB4:C5_01610W_A:CCN1:C5_01930W_A:C5_02010C_A:C5_02070C_A:RIX7:PDE1:C5_02440C_A:TIF5:SPR28:UTP13:BUR2:CKB2:MSW1:C5_03010W_A:RMS1:PCL1:RPO26:FUR1:C5_03400C_A:C5_03840W_A:HAM1:C5_03920C_A:C5_04120C_A:SAH1:URA7:MSM1:C5_04720C_A:HYS2:HAS1:C5_04840C_A:C5_04910W_A:GRF10:C5_05340W_A:DNA2:NOP5:C6_00530C_A:FCA1:C6_00640C_A:CDC14:TOP1:C6_01040C_A:C6_01120C_A:CIC1:EBP1:RAD18:C6_01890C_A:SWD3:C6_02230W_A:ALG11:C6_02290C_A:C6_02300C_A:C6_02350C_A:C6_02430W_A:PRP45:C6_02690C_A:MRT4:C6_02900C_A:POP4:C6_03210C_A:BMT4:ARP4:C6_03380W_A:C6_03390W_A:C6_03440W_A:NAM2:PAD1:SPB1:C6_04240W_A:NOP8:ILS1:C6_04530C_A:C7_00160C_A:C7_00220W_A:C7_00330C_A:DCC1:PSF3:THG1:RPA135:NOP15:C7_01030C_A:DBP7:C7_01210C_A:C7_01270C_A:PSF1:C7_01360C_A:C7_01400C_A:GIR2:FLU1:C7_01570C_A:SMC6:C7_01950W_A:LIG1:C7_02340C_A:C7_02460C_A:C7_02660C_A:C7_02930C_A:C7_03400C_A:ISY1:ENP2:C7_03590C_A:ENP1:C7_03850W_A:C7_03880C_A:C7_04150W_A:UTP18:MIS12:MMS22:RTT109:CR_00430C_A:CR_00460C_A:ADE1:BUD22:PWP2:CR_00830W_A:TRM1:DAL81:CTF18:CR_01260W_A:CR_01320C_A:CR_01410C_A:PRS:CR_01550C_A:TRP2:CR_01600C_A:MET6:CR_01670W_A:CD60:CR_01700C_A:CR_01710W_A:CR_01780W_A:CR_01950W_A:CR_02030C_A:MCM6:ERG25:CR_02420W_A:CR_02550C_A:RRP9:RPC31:CR_02890C_A:SRP40:ARC1:SMC5:CR_03110W_A:CR_03200C_A:CR_03230W_A:CR_03340C_A:CR_03360W_A:KTI12:CR_03400W_A:CR_03440W_A:NCS2:YVH1:SGD1:SMC1:PRP42:CR_03940W_A:CR_04110W_A:CR_04160C_A:CR_04170W_A:QDR1:CR_04240C_A:CR_04300W_A:CR_04500C_A:CR_04560C_A:CR_04710W_A:ADE6:RPB8:CR_04920W_A:NOC2:CR_05550C_A:RNR3:MTG2:DBP8:RFX1:RPL7:CR_06230W_A:FGR50:CR_06450W_A:RRN11:CR_06680C_A:NMD3:CR_06840W_A:CR_06970C_A:POL2:MIS11:CR_07030C_A:URA2:CR_07310W_A:PIF1:FUN30:CR_07640C_A:ARO2:CDC45:DBP6:IMP4:CR_08000C_A:NOP10:SSB1:RIO2:ATS1:CR_08330W_A:CR_08410W_A:TSR1:CR_08940W_A:MPS1:SSF1:CR_09740W_A:MED21:CR_09800C_A:DPB2:SIK1:CR_10180W_A:UTP5:CR_10260W_A:CR_10410C_A:CR_10470C_A:MCD1:DRS1:LTV1:POP3</p> |
|--|--|--|--|--|--|---------------------------------------------------------------------------------------------------------------------------------------------------------------------------------------------------------------------------------------------------------------------------------------------------------------------------------------------------------------------------------------------------------------------------------------------------------------------------------------------------------------------------------------------------------------------------------------------------------------------------------------------------------------------------------------------------------------------------------------------------------------------------------------------------------------------------------------------------------------------------------------------------------------------------------------------------------------------------------------------------------------------------------------------------------------------------------------------------------------------------------------------------------------------------------------------------------------------------------------------------------------------------------------------------------------------------------------------------------------------------------------------------------------------------------------------------------------------------------------------------------------------------------------------------------------------------------------------------------------------------------------------------------------------------------------------------------------------------------------------------------------------------------------------------------------------------------------------------------------------------------------------------------------------------------------------------------------------------------------------------------------------------------------------------------------------------------------------------------------------------------------------------------------------------------------------------------------------------------------------------------------------------------------------------------------------------------------------------------------------------------------------------------------------------------------------------------------------------------------------------------------------------------------------------------------------------------------|

|       |                                    |                              |                                        |          |       |                                                                                                                                                                                                                                                                                                                                                                                                                                                                                                                                                                                                                                                                                                                                                                                                                                                                                                                                                                                                                                                                                                                                                                                                                                                                                                                                                                                                                                                                                                                                                                                                                                                                                                                                                                                                                                                                                                                                                                                                                                                                                                                                                                                                                                                                                                                                                                                                                                                                                                                                                                                                                                                    |
|-------|------------------------------------|------------------------------|----------------------------------------|----------|-------|----------------------------------------------------------------------------------------------------------------------------------------------------------------------------------------------------------------------------------------------------------------------------------------------------------------------------------------------------------------------------------------------------------------------------------------------------------------------------------------------------------------------------------------------------------------------------------------------------------------------------------------------------------------------------------------------------------------------------------------------------------------------------------------------------------------------------------------------------------------------------------------------------------------------------------------------------------------------------------------------------------------------------------------------------------------------------------------------------------------------------------------------------------------------------------------------------------------------------------------------------------------------------------------------------------------------------------------------------------------------------------------------------------------------------------------------------------------------------------------------------------------------------------------------------------------------------------------------------------------------------------------------------------------------------------------------------------------------------------------------------------------------------------------------------------------------------------------------------------------------------------------------------------------------------------------------------------------------------------------------------------------------------------------------------------------------------------------------------------------------------------------------------------------------------------------------------------------------------------------------------------------------------------------------------------------------------------------------------------------------------------------------------------------------------------------------------------------------------------------------------------------------------------------------------------------------------------------------------------------------------------------------------|
| 42273 | ribosomal large subunit biogenesis | 279 out of 1061 genes, 26.3% | 546 out of 6473 background genes, 8.4% | 1.39E-84 | 0.00% | RRS1:TRI1:C1_02090C_A:C1_02450C_A:PDE2:C1_02900C_A:RPP1:C1_03830C_A:C1_04040C_A:C1_04120C_A:ERB1:NOP4:C1_04510W_A:C1_04710C_A:C1_04970W_A:RPP6:REI1:TRY2:C1_05220C_A:C1_05360C_A:C1_05650W_A:C1_06540C_A:NOP6:C1_06760C_A:RIA1:C1_07510W_A:C1_07660W_A:ERD1:C1_07960W_A:GCR3:C1_08630W_A:JIP5:C1_09040C_A:CEF1:C1_09390W_A:YTM1:C1_09710C_A:PDC2:DBP3:FCY23:RPA190:C1_10920W_A:C1_10970W_A:C1_11000C_A:MUP1:C1_11900C_A:C1_11910W_A:TRP3:C1_12280C_A:CSI2:C1_12350W_A:C1_12440W_A:C1_12570C_A:C1_12630C_A:C1_12750C_A:C1_12760W_A:C1_12820C_A:RMP1:C1_13370W_A:C1_13380W_A:MCU1:C1_14080W_A:C2_00200W_A:C2_00280C_A:C2_00820W_A:C2_01070W_A:C2_01220W_A:C2_01820C_A:C2_01860C_A:C2_02120W_A:UTP22:C2_02540W_A:C2_02630W_A:PRP3:SCH9:C2_04120C_A:SUV3:C2_04570W_A:SNU114:C2_04700C_A:PZF1:CKA2:C2_05050C_A:MAK5:C2_05160C_A:RPF2:C2_05750W_A:C2_05830C_A:LAS1:ECM17:MAK16:C2_06520C_A:C2_06530W_A:C2_06660W_A:RPL11:C2_06850W_A:NSA1:C2_08180C_A:EAF3:RRP8:C2_08530C_A:MSU1:UTP15:MFG1:C2_09160W_A:C2_09180W_A:MED18:PES1:RRP15:C2_09660W_A:SMM1:C2_09920W_A:CWC22:C2_10740C_A:C3_00660W_A:C3_00830C_A:BMS1:ARP9:NCE103:C3_01310W_A:C3_01560W_A:C3_02040C_A:ILV2:C3_02350W_A:C3_02670W_A:SMC3:C3_02840W_A:C3_02850C_A:C3_03330C_A:C3_04370C_A:MAK21:ARV1:SFP1:NOP14:CEM1:C3_05160C_A:RPL8B:C3_05280C_A:C3_05380W_A:C3_05440C_A:QDR2:C3_05800W_A:C3_05860C_A:C3_05900W_A:NOG1:C3_06150W_A:C3_06370C_A:NSA2:PRP5:C3_07550C_A:C3_07570C_A:RAD4:DUR4:RPL24:NMD5:C4_00740W_A:RAT1:C4_01280C_A:SLX4:HIT1:C4_02880C_A:DAO2:C4_03720C_A:NUP84:C4_03830W_A:RAM1:AGP3:C4_05010W_A:C4_05230C_A:C4_05260W_A:C4_05360C_A:C4_06210C_A:C4_06410W_A:C4_06790W_A:C4_06950W_A:C4_07060W_A:RMT2:C5_00920W_A:C5_01430C_A:SPB4:C5_01930W_A:C5_02010C_A:RIX7:C5_02440C_A:SPR28:BUR2:CKB2:C5_03010W_A:RMS1:C5_03920C_A:C5_04120C_A:C5_04720C_A:HAS1:C5_04910W_A:GRF10:C5_05340W_A:C6_01120C_A:CIC1:C6_01890C_A:SWD3:C6_02230W_A:ALG11:C6_02430W_A:MRT4:C6_03210C_A:C6_03390W_A:C6_03440W_A:SPB1:C6_04240W_A:NOP8:C7_00160C_A:RPA135:NOP15:DBP7:C7_01360C_A:GIR2:FLU1:C7_01570C_A:LIG1:C7_02460C_A:C7_02660C_A:C7_02930C_A:C7_03400C_A:ISY1:ENP2:C7_03590C_A:ENP1:C7_03850W_A:C7_03880C_A:C7_04150W_A:UTP18:BUD22:PWP2:CR_00830W_A:DAL81:CR_01320C_A:CR_01410C_A:CR_01550C_A:CR_01600C_A:CR_01670W_A:CR_01700C_A:CR_02030C_A:CR_02890C_A:CR_03200C_A:CR_03360W_A:YVH1:SGD1:PRP42:CR_03940W_A:CR_04170W_A:CR_04500C_A:CR_04710W_A:NOC2:CR_05550C_A:RNR3:SDA1:RPL7:CR_06230W_A:CR_06450W_A:RRN11:CR_06680C_A:CR_06970C_A:PIF1:CR_07640C_A:DBP6:CR_08000C_A:CR_08330W_A:CR_08410W_A:TSR1:CR_08500W_A:ELF1:SSF1:CR_09740W_A:MED21:CR_09800C_A:CR_10260W_A:CR_10470C_A:DRS1:LTV1 |
|-------|------------------------------------|------------------------------|----------------------------------------|----------|-------|----------------------------------------------------------------------------------------------------------------------------------------------------------------------------------------------------------------------------------------------------------------------------------------------------------------------------------------------------------------------------------------------------------------------------------------------------------------------------------------------------------------------------------------------------------------------------------------------------------------------------------------------------------------------------------------------------------------------------------------------------------------------------------------------------------------------------------------------------------------------------------------------------------------------------------------------------------------------------------------------------------------------------------------------------------------------------------------------------------------------------------------------------------------------------------------------------------------------------------------------------------------------------------------------------------------------------------------------------------------------------------------------------------------------------------------------------------------------------------------------------------------------------------------------------------------------------------------------------------------------------------------------------------------------------------------------------------------------------------------------------------------------------------------------------------------------------------------------------------------------------------------------------------------------------------------------------------------------------------------------------------------------------------------------------------------------------------------------------------------------------------------------------------------------------------------------------------------------------------------------------------------------------------------------------------------------------------------------------------------------------------------------------------------------------------------------------------------------------------------------------------------------------------------------------------------------------------------------------------------------------------------------------|

|       |                 |                              |                                          |          |       |                                                                                                                                                                                                                                                                                                                                                                                                                                                                                                                                                                                                                                                                                                                                                                                                                                                                                                                                                                                                                                                                                                                                                                                                                                                                                                                                                                                                                                                                                                                                                                                                                                                                                                                                                                                                                                                                                                                                                                                                                                                                                                                                                                                                                                                                                                                                                                                                                                                                                                                                                                                                                                                                      |
|-------|-----------------|------------------------------|------------------------------------------|----------|-------|----------------------------------------------------------------------------------------------------------------------------------------------------------------------------------------------------------------------------------------------------------------------------------------------------------------------------------------------------------------------------------------------------------------------------------------------------------------------------------------------------------------------------------------------------------------------------------------------------------------------------------------------------------------------------------------------------------------------------------------------------------------------------------------------------------------------------------------------------------------------------------------------------------------------------------------------------------------------------------------------------------------------------------------------------------------------------------------------------------------------------------------------------------------------------------------------------------------------------------------------------------------------------------------------------------------------------------------------------------------------------------------------------------------------------------------------------------------------------------------------------------------------------------------------------------------------------------------------------------------------------------------------------------------------------------------------------------------------------------------------------------------------------------------------------------------------------------------------------------------------------------------------------------------------------------------------------------------------------------------------------------------------------------------------------------------------------------------------------------------------------------------------------------------------------------------------------------------------------------------------------------------------------------------------------------------------------------------------------------------------------------------------------------------------------------------------------------------------------------------------------------------------------------------------------------------------------------------------------------------------------------------------------------------------|
| 10467 | gene expression | 602 out of 1061 genes, 56.7% | 1951 out of 6473 background genes, 30.1% | 1.63E-84 | 0.00% | RIM8:HBR1:CNS1:RPO41:NRM1:RRS1:TRI1:HMT1:C1_01150C_A:C1_01160C_A:TRM2:C1_01530C_A:C1_02090C_A:ABP140:C1_02380C_A:C1_02450C_A:HOM6:PDE2:MIA40:C1_02900C_A:TSR2:C1_03370W_A:C1_03540C_A:C1_03630W_A:C1_03790C_A:RPP1:C1_03830C_A:C1_04040C_A:C1_04120C_A:ERB1:NOP4:C1_04510W_A:C1_04530C_A:C1_04710C_A:MRPL37:C1_04970W_A:RRP6:REI1:TRY2:C1_05220C_A:C1_05270C_A:C1_05360C_A:C1_05380C_A:RSM22:RPS27A:C1_05630C_A:FAL1:C1_05650W_A:C1_06530C_A:C1_06540C_A:NOP6:C1_06760C_A:RIA1:C1_07340W_A:C1_07470C_A:LHP1:C1_07510W_A:C1_07660W_A:MRPL3:ERD1:C1_07950C_A:C1_07960W_A:FUN12:DRG1:CAT8:MLT1:DIP2:GCR3:C1_08520C_A:GCD6:C1_08630W_A:MSS116:C1_08890C_A:CEF1:C1_09390W_A:C1_09710C_A:C1_09790C_A:BUD31:C1_09910C_A:PDC2:DBP3:MNN23:C1_10080W_A:C1_10200C_A:FCY23:C1_10620W_A:RPA190:C1_10690W_A:C1_10920W_A:C1_10950C_A:C1_10970W_A:C1_11000C_A:PET127:FGR39:NEP1:KRR1:SAM2:MUP1:C1_11880W_A:C1_11900C_A:C1_11910W_A:SER33:TRP3:C1_12280C_A:CSI2:MRPS9:C1_12350W_A:WRS1:C1_12440W_A:C1_12570C_A:C1_12630C_A:C1_12670C_A:C1_12750C_A:C1_12760W_A:FEN1:C1_12820C_A:RPL14:C1_13060C_A:REX3:RMP1:C1_13380W_A:MCU1:C1_13820C_A:C1_14080W_A:C1_14330W_A:MPP10:FAV3:C2_00200W_A:C2_00280C_A:C2_00410C_A:C2_00820W_A:C2_00840W_A:C2_01070W_A:C2_01220W_A:C2_01420C_A:REX2:C2_01740C_A:C2_01820C_A:PRP39:C2_01860C_A:C2_01870C_A:C2_02120W_A:C2_02270C_A:C2_02420C_A:UTP21:UTP22:PRS1:C2_02540W_A:C2_02630W_A:PDR17:C2_02930C_A:MET1:SMP3:PRP3:C2_03560C_A:SCH9:C2_03950W_A:C2_04120C_A:TBF1:SUV3:RIM2:C2_04570W_A:SNU114:C2_04700C_A:C2_04820W_A:PZF1:CKA2:C2_05050C_A:C2_05080C_A:MAK5:C2_05160C_A:RPF2:C2_05270W_A:RPC40:KTI11:C2_05670C_A:C2_05750W_A:C2_05830C_A:C2_05840W_A:IDP1:LAS1:ECM17:SER1:MAK16:C2_06480W_A:C2_06520C_A:C2_06530W_A:VAS1:C2_06650C_A:C2_06660W_A:RPL11:FHL1:C2_06850W_A:C2_06950C_A:SPE3:NOC4:C2_07360W_A:RCL1:C2_07680W_A:PHO86:PRS5:C2_07920W_A:NSA1:C2_08180C_A:EAF3:RRP8:C2_08530C_A:MSU1:UTP15:MFG1:C2_09160W_A:C2_09180W_A:MED18:C2_09310C_A:PES1:TAZ1:RRP15:C2_09500W_A:C2_09660W_A:SMM1:C2_09920W_A:CWC22:UBP8:PUS7:HEM3:C2_10740C_A:RPC11:C2_10810W_A:RPS24:C3_00100W_A:ULP3:UTP8:BUD21:SOF1:C3_00660W_A:C3_00830C_A:BMS1:ARP9:UTP20:NCE103:C3_01310W_A:MET18:RPS7A:C3_01520C_A:C3_01560W_A:C3_02020W_A:C3_02040C_A:UTP4:C3_02180C_A:ILV2:C3_02350W_A:C3_02670W_A:C3_02750W_A:C3_02840W_A:C3_02850C_A:C3_03070W_A:C3_03110W_A:C3_03330C_A:C3_03560W_A:HB R3:C3_04370C_A:C3_04380C_A:MAK21:RPS15:RPP2B:ARV1:SFP1:NOP14:CEM1:C3_05140C_A:C3_05160C_A:RPL8B:C3_05280C_A:C3_05380W_A:C3_05440C_A:QDR2:C3_05800W_A:C3_05860C_A:TRM12:C3_05900W_A:CTA4:NOG1:C3_06150W_A:C3_06240C_A:DOT1:ISW2:C3_06370C_A:NSA2:PRP5:C3_06830C_A:RPS12:NOP13:C3_ |
|-------|-----------------|------------------------------|------------------------------------------|----------|-------|----------------------------------------------------------------------------------------------------------------------------------------------------------------------------------------------------------------------------------------------------------------------------------------------------------------------------------------------------------------------------------------------------------------------------------------------------------------------------------------------------------------------------------------------------------------------------------------------------------------------------------------------------------------------------------------------------------------------------------------------------------------------------------------------------------------------------------------------------------------------------------------------------------------------------------------------------------------------------------------------------------------------------------------------------------------------------------------------------------------------------------------------------------------------------------------------------------------------------------------------------------------------------------------------------------------------------------------------------------------------------------------------------------------------------------------------------------------------------------------------------------------------------------------------------------------------------------------------------------------------------------------------------------------------------------------------------------------------------------------------------------------------------------------------------------------------------------------------------------------------------------------------------------------------------------------------------------------------------------------------------------------------------------------------------------------------------------------------------------------------------------------------------------------------------------------------------------------------------------------------------------------------------------------------------------------------------------------------------------------------------------------------------------------------------------------------------------------------------------------------------------------------------------------------------------------------------------------------------------------------------------------------------------------------|

|  |  |  |  |  |                                                                                                                                                                                                                                                                                                                                                                                                                                                                                                                                                                                                                                                                                                                                                                                                                                                                                                                                                                                                                                                                                                                                                                                                                                                                                                                                                                                                                                                                                                                                                                                                                                                                                                                                                                                                                                                                                                                                                                                                                                                                                                                                                                                                                                                                                                                                                                                                                                                                                                                                                                                                                                                                                                                                                                                                            |
|--|--|--|--|--|------------------------------------------------------------------------------------------------------------------------------------------------------------------------------------------------------------------------------------------------------------------------------------------------------------------------------------------------------------------------------------------------------------------------------------------------------------------------------------------------------------------------------------------------------------------------------------------------------------------------------------------------------------------------------------------------------------------------------------------------------------------------------------------------------------------------------------------------------------------------------------------------------------------------------------------------------------------------------------------------------------------------------------------------------------------------------------------------------------------------------------------------------------------------------------------------------------------------------------------------------------------------------------------------------------------------------------------------------------------------------------------------------------------------------------------------------------------------------------------------------------------------------------------------------------------------------------------------------------------------------------------------------------------------------------------------------------------------------------------------------------------------------------------------------------------------------------------------------------------------------------------------------------------------------------------------------------------------------------------------------------------------------------------------------------------------------------------------------------------------------------------------------------------------------------------------------------------------------------------------------------------------------------------------------------------------------------------------------------------------------------------------------------------------------------------------------------------------------------------------------------------------------------------------------------------------------------------------------------------------------------------------------------------------------------------------------------------------------------------------------------------------------------------------------------|
|  |  |  |  |  | 07400W_A:C3_07550C_A:C3_07570C_A:RIT1:RAD4:UTP9:C3_07800C_A:DUR4:RLP2<br>4:NMD5:HIS5:C4_00690C_A:C4_00740W_A:C4_00800W_A:C4_00810C_A:C4_0088<br>0W_A:ARO1:C4_00940W_A:RAT1:C4_01280C_A:PGA53:PWP1:NIP1:C4_01500W_A:<br>TOA2:HSX11:TIM10:ZCF25:C4_02400C_A:SLX4:HIT1:SAS10:RPC53:HCA4:C4_02850<br>W_A:ZUO1:C4_02880C_A:NAN1:C4_03140C_A:C4_03170W_A:DAO2:C4_03410W_<br>A:RAD2:C4_03720C_A:C4_03730C_A:C4_03740W_A:NUP84:C4_03830W_A:RRP42:<br>RAM1:ECM1:C4_04130W_A:DUO1:C4_04390W_A:C4_04520W_A:SSZ1:BAS1:C4_04<br>810C_A:AGP3:RPL30:C4_05230C_A:C4_05260W_A:C4_05360C_A:OFD1:C4_05650<br>W_A:C4_06210C_A:C4_06410W_A:NOP1:C4_06790W_A:C4_06950W_A:C4_07060<br>W_A:C4_07140W_A:C4_07150W_A:C5_00030W_A:C5_00280C_A:DUS4:C5_00320<br>W_A:MRP17:MET14:RMT2:C5_00820W_A:C5_00920W_A:BUD23:CYC3:C5_01140C<br>_A:PUS4:C5_01430C_A:FYV5:SPB4:C5_01610W_A:C5_01700W_A:C5_01930W_A:C<br>5_02010C_A:C5_02070C_A:RIX7:C5_02440C_A:TIF5:SPR28:UTP13:C5_02590C_A:B<br>UR2:CKB2:MSW1:C5_02780W_A:C5_02820C_A:C5_03010W_A:RMS1:CAM1-<br>1:C5_03290C_A:RPO26:FUR1:C5_03400C_A:C5_03530C_A:C5_03550W_A:MDJ1:C5<br>_03920C_A:C5_04120C_A:C5_04290C_A:C5_04340W_A:CSU57:MSM1:HAS1:C5_04<br>840C_A:C5_04910W_A:GRF10:C5_05250C_A:SDH4:C5_05340W_A:NOP5:C6_00530<br>C_A:C6_00640C_A:CDC14:TOP1:C6_01040C_A:C6_01120C_A:CIC1:PMP1:TIF3:HCH1<br>:C6_01890C_A:C6_01980C_A:SWD3:C6_02230W_A:RPL10A:ALG11:C6_02290C_A:C<br>6_02300C_A:C6_02350C_A:C6_02370C_A:C6_02430W_A:PRP45:C6_02690C_A:MR<br>T4:C6_02900C_A:POP4:C6_03210C_A:C6_03380W_A:C6_03390W_A:C6_03440W_<br>A:NAM2:SPB1:C6_04240W_A:NOP8:ILS1:C6_04530C_A:C7_00160C_A:C7_00220W_<br>A:C7_00330C_A:THG1:RPA135:NOP15:YML6:C7_01020C_A:C7_01030C_A:DBP7:C7<br>_01210C_A:ASC1:C7_01270C_A:C7_01360C_A:C7_01400C_A:GIR2:PRT1:FLU1:C7_0<br>1570C_A:C7_01600W_A:C7_01950W_A:LIG1:C7_02340C_A:C7_02460C_A:C7_0266<br>0C_A:C7_02930C_A:IFM1:C7_03400C_A:ISY1:ENP2:C7_03590C_A:ENP1:HIS7:MRP7:<br>C7_03850W_A:C7_03880C_A:C7_04150W_A:UTP18:CR_00430C_A:CR_00460C_A:<br>MRPL6:ADE1:BUD22:PWP2:CR_00830W_A:TRM1:DAL81:CR_01320C_A:CR_01410C<br>_A:PRS:CR_01550C_A:CR_01600C_A:CR_01670W_A:CDC60:CR_01700C_A:CR_0171<br>0W_A:CR_01780W_A:CR_01950W_A:CR_02030C_A:MCM6:ERG25:CR_02420W_A:<br>CR_02430C_A:CR_02550C_A:RRP9:RPC31:CR_02890C_A:SRP40:ARC1:SMC5:CR_031<br>10W_A:CR_03200C_A:CR_03230W_A:CR_03360W_A:KTI12:MTG1:CR_03400W_A:N<br>CS2:YVH1:SMC1:PRP42:CR_03940W_A:MEX67:CR_04110W_A:CR_04160C_A:CR_04<br>170W_A:CR_04240C_A:CR_04300W_A:CR_04500C_A:CR_04710W_A:RPB8:CR_049<br>20W_A:NOC2:CR_05550C_A:RNR3:MTG2:DBP8:RFX1:RPL7:CR_06230W_A:FGR50:C<br>R_06450W_A:RRN11:HSP60:CR_06680C_A:NMD3:CR_06840W_A:CR_06970C_A:CR<br>_06980W_A:POL2:CR_07030C_A:URA2:CR_07310W_A:PIF1:FUN30:CR_07640C_A:C<br>DC45:DBP6:IMP4:CR_08000C_A:NOP10:SSB1:RIO2:ATS1:CR_08330W_A:RPP2A:GSH |
|--|--|--|--|--|------------------------------------------------------------------------------------------------------------------------------------------------------------------------------------------------------------------------------------------------------------------------------------------------------------------------------------------------------------------------------------------------------------------------------------------------------------------------------------------------------------------------------------------------------------------------------------------------------------------------------------------------------------------------------------------------------------------------------------------------------------------------------------------------------------------------------------------------------------------------------------------------------------------------------------------------------------------------------------------------------------------------------------------------------------------------------------------------------------------------------------------------------------------------------------------------------------------------------------------------------------------------------------------------------------------------------------------------------------------------------------------------------------------------------------------------------------------------------------------------------------------------------------------------------------------------------------------------------------------------------------------------------------------------------------------------------------------------------------------------------------------------------------------------------------------------------------------------------------------------------------------------------------------------------------------------------------------------------------------------------------------------------------------------------------------------------------------------------------------------------------------------------------------------------------------------------------------------------------------------------------------------------------------------------------------------------------------------------------------------------------------------------------------------------------------------------------------------------------------------------------------------------------------------------------------------------------------------------------------------------------------------------------------------------------------------------------------------------------------------------------------------------------------------------------|



|  |  |  |  |  |  |                                                                                                                                               |
|--|--|--|--|--|--|-----------------------------------------------------------------------------------------------------------------------------------------------|
|  |  |  |  |  |  | 2:CR_08410W_A:TSR1:CR_08940W_A:MPS1:ELF1:SSF1:CR_09740W_A:MED21:CR_09800C_A:DPB2:SIK1:UTP5:CR_10260W_A:CR_10410C_A:CR_10470C_A:DRS1:LTV1:POP3 |
|--|--|--|--|--|--|-----------------------------------------------------------------------------------------------------------------------------------------------|

|       |                               |                              |                                          |          |       |                                                                                                                                                                                                                                                                                                                                                                                                                                                                                                                                                                                                                                                                                                                                                                                                                                                                                                                                                                                                                                                                                                                                                                                                                                                                                                                                                                                                                                                                                                                                                                                                                                                                                                                                                                                                                                                                                                                                                                                                                                                                                                                                                                                                                                                                                                                                                                                                                                                                                                                                                                                                                                                                           |
|-------|-------------------------------|------------------------------|------------------------------------------|----------|-------|---------------------------------------------------------------------------------------------------------------------------------------------------------------------------------------------------------------------------------------------------------------------------------------------------------------------------------------------------------------------------------------------------------------------------------------------------------------------------------------------------------------------------------------------------------------------------------------------------------------------------------------------------------------------------------------------------------------------------------------------------------------------------------------------------------------------------------------------------------------------------------------------------------------------------------------------------------------------------------------------------------------------------------------------------------------------------------------------------------------------------------------------------------------------------------------------------------------------------------------------------------------------------------------------------------------------------------------------------------------------------------------------------------------------------------------------------------------------------------------------------------------------------------------------------------------------------------------------------------------------------------------------------------------------------------------------------------------------------------------------------------------------------------------------------------------------------------------------------------------------------------------------------------------------------------------------------------------------------------------------------------------------------------------------------------------------------------------------------------------------------------------------------------------------------------------------------------------------------------------------------------------------------------------------------------------------------------------------------------------------------------------------------------------------------------------------------------------------------------------------------------------------------------------------------------------------------------------------------------------------------------------------------------------------------|
| 44249 | cellular biosynthetic process | 694 out of 1061 genes, 65.4% | 2485 out of 6473 background genes, 38.4% | 9.94E-82 | 0.00% | RIM8:LEU4:HBR1:C1_00510W_A:CNS1:RPO41:SPE1:NRM1:RRS1:TRI1:HMT1:C1_01150C_A:C1_01160C_A:TRM2:ABC1:C1_01530C_A:CYS4:C1_02090C_A:ABP140:CWH8:C1_02380C_A:C1_02450C_A:SNZ1:SNO1:HOM6:LYS2:PDE2:MIA40:C1_02900C_A:C1_02970W_A:TSR2:C1_03370W_A:C1_03540C_A:C1_03630W_A:C1_03790C_A:RPP1:C1_03830C_A:KTR4:C1_04040C_A:C1_04120C_A:ERB1:NOP4:C1_04510W_A:C1_04530C_A:C1_04710C_A:MRPL37:C1_04970W_A:RHD1:ARG2:RRP6:REI1:TRY2:ARO4:C1_05220C_A:C1_05270C_A:C1_05360C_A:C1_05380C_A:RSM22:RPS27A:C1_05630C_A:FAL1:C1_05650W_A:RAD10:C1_05990C_A:BUD16:C1_06530C_A:C1_06540C_A:NOP6:C1_06760C_A:RIA1:YMC1:C1_07340W_A:C1_07470C_A:LHP1:C1_07510W_A:C1_07660W_A:ADE4:GCS1:ADE5,7:MRPL3:ERD1:C1_07950C_A:C1_07960W_A:FUN12:DRG1:CAT8:MLT1:DIP2:SAM4:GCR3:C1_08520C_A:GCD6:C1_08630W_A:MS5116:C1_08890C_A:CEF1:C1_09390W_A:GUA1:C1_09710C_A:C1_09790C_A:BUD31:C1_09910C_A:PDC2:DBP3:MNN23:C1_10080W_A:C1_10200C_A:C1_10340W_A:FCY23:C1_10620W_A:RPA190:C1_10690W_A:C1_10920W_A:C1_10950C_A:C1_10970W_A:C1_11000C_A:PET127:FGR39:NEP1:KRR1:SAM2:C1_11610C_A:C1_11790W_A:MUP1:C1_11880W_A:C1_11900C_A:C1_11910W_A:SER33:TRP3:C1_12280C_A:CSI2:MRPS9:C1_12350W_A:WRS1:C1_12440W_A:C1_12570C_A:C1_12630C_A:C1_12670C_A:C1_12750C_A:C1_12760W_A:FEN1:C1_12820C_A:RPL14:C1_13060C_A:REX3:C1_13330C_A:RMP1:C1_13380W_A:AGC1:MCU1:C1_13820C_A:C1_14080W_A:C1_14330W_A:MPP10:FAV3:C2_00200W_A:C2_00280C_A:C2_00390C_A:C2_00410C_A:C2_00820W_A:C2_00840W_A:MXR1:C2_01070W_A:C2_01220W_A:C2_01420C_A:APT1:REX2:C2_01740C_A:C2_01820C_A:PRP39:C2_01860C_A:C2_01870C_A:ARO3:C2_02120W_A:C2_02270C_A:C2_02420C_A:UTP21:UTP22:PRS1:C2_02540W_A:C2_02630W_A:PDR17:SER2:C2_02930C_A:MET1:BNA31:SMP3:PRP3:C2_03560C_A:MNN42:GPI13:SCH9:C2_03950W_A:C2_04120C_A:TBF1:BAT21:SUV3:RIM2:C2_04570W_A:SNU114:C2_04700C_A:C2_04820W_A:PZF1:CKA2:C2_05050C_A:C2_05080C_A:MAK5:C2_05160C_A:CDC21:RPF2:C2_05270W_A:RPC40:KTI11:C2_05670C_A:C2_05750W_A:C2_05830C_A:C2_05840W_A:IDP1:LAS1:ECM17:ILV1:SER1:MAK16:C2_06480W_A:C2_06520C_A:C2_06530W_A:VAS1:C2_06650C_A:C2_06660W_A:RPL11:FHL1:C2_06850W_A:C2_06950C_A:SPE3:AAH1:NOC4:C2_07360W_A:C2_07410W_A:RCL1:C2_07680W_A:PHO86:PRS5:C2_07920W_A:NSA1:C2_08180C_A:EAF3:RRP8:C2_08530C_A:MSU1:UTP15:MFG1:ASN1:C2_09160W_A:C2_09180W_A:MED18:C2_09310C_A:PES1:TAZ1:RRP15:C2_09500W_A:C2_09660W_A:LEU42:SMM1:C2_09920W_A:CWC22:UBP8:PUS7:HEM3:C2_10740C_A:RPC11:C2_10810W_A:RPS24:C3_00100W_A:ULP3:UTP8:BUD21:SOF1:C3_00660W_A:C3_00830C_A:BMS1:ARP9:UTP20:NCE103:C3_01310W_A:URA3:MET18:RKI1:RPS7A:C3_01520C_A:C3_01560W_A:C3_02020W_A:C3_02040C_A:UTP4:C3_02180C_A:ILV2:C3_02350W_A:PHA2:C3_02670W_A:C3_02750W_A:C3_02840W_A:C3_02850C_A:MET13:C3_03070W_A:C3_0311 |
|-------|-------------------------------|------------------------------|------------------------------------------|----------|-------|---------------------------------------------------------------------------------------------------------------------------------------------------------------------------------------------------------------------------------------------------------------------------------------------------------------------------------------------------------------------------------------------------------------------------------------------------------------------------------------------------------------------------------------------------------------------------------------------------------------------------------------------------------------------------------------------------------------------------------------------------------------------------------------------------------------------------------------------------------------------------------------------------------------------------------------------------------------------------------------------------------------------------------------------------------------------------------------------------------------------------------------------------------------------------------------------------------------------------------------------------------------------------------------------------------------------------------------------------------------------------------------------------------------------------------------------------------------------------------------------------------------------------------------------------------------------------------------------------------------------------------------------------------------------------------------------------------------------------------------------------------------------------------------------------------------------------------------------------------------------------------------------------------------------------------------------------------------------------------------------------------------------------------------------------------------------------------------------------------------------------------------------------------------------------------------------------------------------------------------------------------------------------------------------------------------------------------------------------------------------------------------------------------------------------------------------------------------------------------------------------------------------------------------------------------------------------------------------------------------------------------------------------------------------------|

|  |  |  |  |  |  |                                                                                                                                                                                                                                                                                                                                                                                                                                                                                                                                                                                                                                                                                                                                                                                                                                                                                                                                                                                                                                                                                                                                                                                                                                                                                                                                                                                                                                                                                                                                                                                                                                                                                                                                                                                                                                                                                                                                                                                                                                                                                                                                                                                                                                                                                                                                                                                                                                                                                                                                                                                                                                                     |
|--|--|--|--|--|--|-----------------------------------------------------------------------------------------------------------------------------------------------------------------------------------------------------------------------------------------------------------------------------------------------------------------------------------------------------------------------------------------------------------------------------------------------------------------------------------------------------------------------------------------------------------------------------------------------------------------------------------------------------------------------------------------------------------------------------------------------------------------------------------------------------------------------------------------------------------------------------------------------------------------------------------------------------------------------------------------------------------------------------------------------------------------------------------------------------------------------------------------------------------------------------------------------------------------------------------------------------------------------------------------------------------------------------------------------------------------------------------------------------------------------------------------------------------------------------------------------------------------------------------------------------------------------------------------------------------------------------------------------------------------------------------------------------------------------------------------------------------------------------------------------------------------------------------------------------------------------------------------------------------------------------------------------------------------------------------------------------------------------------------------------------------------------------------------------------------------------------------------------------------------------------------------------------------------------------------------------------------------------------------------------------------------------------------------------------------------------------------------------------------------------------------------------------------------------------------------------------------------------------------------------------------------------------------------------------------------------------------------------------|
|  |  |  |  |  |  | OW_A:C3_03330C_A:YAH1:C3_03560W_A:HBR3:RAD53:C3_04370C_A:C3_04380C_A:ADE2:MAK21:RPS15:RPP2B:ARV1:SFP1:NOP14:CEM1:C3_05140C_A:C3_05160C_A:RPL8B:C3_05280C_A:C3_05380W_A:GPI1:C3_05440C_A:QDR2:C3_05800W_A:C3_05860C_A:TRM12:C3_05900W_A:CTA4:NOG1:C3_06150W_A:C3_06240C_A:DOT1:ISW2:C3_06370C_A:NSA2:OPI3:PRP5:C3_06830C_A:RPS12:NOP13:C3_07400W_A:C3_07550C_A:C3_07570C_A:RIT1:RAD4:UTP9:C3_07800C_A:HIS4:MET15:DUR4:RLP24:NMD5:HIS5:C4_00690C_A:C4_00740W_A:C4_00800W_A:C4_00810C_A:C4_00880W_A:ARO1:C4_00940W_A:PTC8:RAT1:C4_01280C_A:PGA53:ILV6:PWP1:NIP1:C4_01500W_A:TOA2:HSX11:TIM10:ZCF25:C4_02400C_A:SLX4:HIT1:SAS10:RPC53:HCA4:C4_02850W_A:ZUO1:C4_02880C_A:NAN1:C4_03140C_A:C4_03170W_A:DAO2:C4_03410W_A:RAD2:C4_03720C_A:C4_03730C_A:C4_03740W_A:NUP84:C4_03830W_A:RRP42:RAM1:ECM1:C4_04130W_A:DUO1:C4_04390W_A:C4_04520W_A:SSZ1:BAS1:C4_04810C_A:AGP3:RPL30:C4_05230C_A:C4_05260W_A:C4_05360C_A:OFD1:HOM3:C4_05650W_A:TRP5:C4_06210C_A:C4_06410W_A:NOP1:C4_06790W_A:C4_06950W_A:MET16:C4_07060W_A:TRP4:C4_07140W_A:C4_07150W_A:C5_00030W_A:C5_00260W_A:C5_00280C_A:DUS4:C5_00320W_A:MRP17:MET14:RMT2:SPE2:C5_00820W_A:C5_00920W_A:BUD23:CYC3:C5_01140C_A:PUS4:C5_01430C_A:FYV5:SPB4:C5_01610W_A:CCN1:C5_01700W_A:C5_01930W_A:C5_02010C_A:C5_02070C_A:RIX7:THR4:C5_02440C_A:TIF5:SPR28:UTP13:C5_02590C_A:BUR2:CKB2:MSW1:C5_02780W_A:C5_02820C_A:C5_03010W_A:RMS1:CAM1-1:C5_03290C_A:PCL1:RPO26:FUR1:C5_03400C_A:C5_03460C_A:C5_03530C_A:C5_03550W_A:MDJ1:C5_03840W_A:C5_03920C_A:C5_03970W_A:C5_04120C_A:SAH1:C5_04290C_A:C5_04340W_A:URA7:CSU57:MSM1:C5_04720C_A:HYS2:HAS1:C5_04840C_A:C5_04910W_A:GRF10:C5_05250C_A:SDH4:HIS1:C5_05340W_A:ILV3:NOP5:C6_00530C_A:C6_00560W_A:FCA1:C6_00640C_A:CDC14:TOP1:HAL22:C6_01040C_A:C6_01120C_A:CIC1:PMP1:TIF3:RAD18:HCH1:C6_01890C_A:C6_01980C_A:SWD3:C6_02230W_A:RPL10A:ALG11:C6_02280W_A:C6_02290C_A:C6_02300C_A:C6_02350C_A:C6_02370C_A:C6_02430W_A:PRP45:C6_02690C_A:MRT4:C6_02900C_A:POP4:C6_03210C_A:C6_03380W_A:C6_03390W_A:C6_03440W_A:NAM2:SPB1:C6_04240W_A:NOP8:ILS1:C6_04530C_A:C7_00160C_A:C7_00220W_A:C7_00330C_A:THG1:RPA135:NOP15:YML6:C7_01020C_A:C7_01030C_A:DBP7:C7_01210C_A:ASC1:C7_01270C_A:C7_01360C_A:C7_01400C_A:GIR2:PRT1:FLU1:C7_01570C_A:C7_01600W_A:C7_01950W_A:LIG1:C7_02340C_A:C7_02460C_A:C7_02660C_A:C7_02930C_A:IFM1:C7_03400C_A:ISY1:ENP2:ARG4:C7_03590C_A:ENP1:HIS7:MRP7:C7_03850W_A:C7_03880C_A:C7_04150W_A:UTP18:MIS12:CR_00430C_A:CR_00460C_A:MRPL6:ADE1:BUD22:PWP2:CR_00830W_A:TRM1:DAL81:CR_01260W_A:CR_01320C_A:CR_01410C_A:PRS:CR_01550C_A:TRP2:CR_01600C_A:MET6:CR_01670W_A:CDC60:CR_01700C_A:CR_01710W_A:CR_01780W_A:CR_01950W_A:CR_02030C_A:MCM6:MET |
|--|--|--|--|--|--|-----------------------------------------------------------------------------------------------------------------------------------------------------------------------------------------------------------------------------------------------------------------------------------------------------------------------------------------------------------------------------------------------------------------------------------------------------------------------------------------------------------------------------------------------------------------------------------------------------------------------------------------------------------------------------------------------------------------------------------------------------------------------------------------------------------------------------------------------------------------------------------------------------------------------------------------------------------------------------------------------------------------------------------------------------------------------------------------------------------------------------------------------------------------------------------------------------------------------------------------------------------------------------------------------------------------------------------------------------------------------------------------------------------------------------------------------------------------------------------------------------------------------------------------------------------------------------------------------------------------------------------------------------------------------------------------------------------------------------------------------------------------------------------------------------------------------------------------------------------------------------------------------------------------------------------------------------------------------------------------------------------------------------------------------------------------------------------------------------------------------------------------------------------------------------------------------------------------------------------------------------------------------------------------------------------------------------------------------------------------------------------------------------------------------------------------------------------------------------------------------------------------------------------------------------------------------------------------------------------------------------------------------------|

|  |  |  |  |  |  |                                                                                                                                                                                                                                                                                                                                                                                                                                                                                                                                                                                                                                                                                                                                                                 |
|--|--|--|--|--|--|-----------------------------------------------------------------------------------------------------------------------------------------------------------------------------------------------------------------------------------------------------------------------------------------------------------------------------------------------------------------------------------------------------------------------------------------------------------------------------------------------------------------------------------------------------------------------------------------------------------------------------------------------------------------------------------------------------------------------------------------------------------------|
|  |  |  |  |  |  | 2:ERG25:CR_02420W_A:CR_02430C_A:CHO2:CR_02550C_A:PAN6:RRP9:RPC31:CR_02890C_A:SRP40:ARC1:SMC5:CR_03110W_A:CR_03200C_A:CR_03230W_A:CR_03360W_A:KTI12:MTG1:CR_03400W_A:NCS2:YVH1:SMC1:PRP42:CR_03940W_A:MEX67:CR_04110W_A:CR_04160C_A:CR_04170W_A:CR_04240C_A:CR_04300W_A:CR_04500C_A:CR_04710W_A:ADE6:RPB8:CR_04920W_A:NOC2:CR_05550C_A:RNR3:MTG2:DBP8:RFX1:RPL7:CR_06230W_A:FGR50:CR_06450W_A:RRN11:HSP60:CR_06680C_A:NMD3:CR_06840W_A:CR_06970C_A:CR_06980W_A:POL2:MIS11:CR_07030C_A:URA2:CR_07310W_A:PIF1:FUN30:CR_07640C_A:ARO2:CDC45:DBP6:IMP4:CR_08000C_A:NOP10:SSB1:RIO2:ATS1:CR_08330W_A:CYS3:RPP2A:GSH2:CR_08410W_A:TSR1:CR_08940W_A:MPS1:ELF1:SSF1:CR_09740W_A:MED21:CR_09800C_A:DPB2:SIK1:UTP5:CR_10260W_A:CR_10410C_A:CR_10470C_A:DRS1:PRO1:LTV1:POP3 |
|--|--|--|--|--|--|-----------------------------------------------------------------------------------------------------------------------------------------------------------------------------------------------------------------------------------------------------------------------------------------------------------------------------------------------------------------------------------------------------------------------------------------------------------------------------------------------------------------------------------------------------------------------------------------------------------------------------------------------------------------------------------------------------------------------------------------------------------------|

|     |                                                                                       |                              |                                        |          |       |                                                                                                                                                                                                                                                                                                                                                                                                                                                                                                                                                                                                                                                                                                                                                                                                                                                                                                                                                                                                                                                                                                                                                                                                                                                                                                                                                                                                                                                                                                                                                                                                                                                                                                                                                                                                                                                                                                                                                                                                                                                                                                                                                                                                                                                                                                                                                |
|-----|---------------------------------------------------------------------------------------|------------------------------|----------------------------------------|----------|-------|------------------------------------------------------------------------------------------------------------------------------------------------------------------------------------------------------------------------------------------------------------------------------------------------------------------------------------------------------------------------------------------------------------------------------------------------------------------------------------------------------------------------------------------------------------------------------------------------------------------------------------------------------------------------------------------------------------------------------------------------------------------------------------------------------------------------------------------------------------------------------------------------------------------------------------------------------------------------------------------------------------------------------------------------------------------------------------------------------------------------------------------------------------------------------------------------------------------------------------------------------------------------------------------------------------------------------------------------------------------------------------------------------------------------------------------------------------------------------------------------------------------------------------------------------------------------------------------------------------------------------------------------------------------------------------------------------------------------------------------------------------------------------------------------------------------------------------------------------------------------------------------------------------------------------------------------------------------------------------------------------------------------------------------------------------------------------------------------------------------------------------------------------------------------------------------------------------------------------------------------------------------------------------------------------------------------------------------------|
| 479 | endonuclease cleavage of tricistronic rRNA transcript (SSU-rRNA, 5.8S rRNA, LSU-rRNA) | 253 out of 1061 genes, 23.8% | 473 out of 6473 background genes, 7.3% | 2.63E-81 | 0.00% | HBR1:CNS1:RPO41:RRS1:C1_02090C_A:C1_02900C_A:C1_03630W_A:RPP1:C1_03830C_A:C1_04040C_A:C1_04120C_A:NOP4:C1_04510W_A:REI1:TRY2:C1_05360C_A:C1_05380C_A:RSM22:C1_05650W_A:C1_06540C_A:NOP6:RIA1:C1_07660W_A:C1_07960W_A:MLT1:DIP2:GCD6:C1_08630W_A:MSS116:CEF1:C1_09390W_A:C1_09710C_A:C1_09790C_A:PDC2:DBP3:MNN23:FCY23:C1_10950C_A:C1_11000C_A:NEP1:KRR1:MUP1:C1_11900C_A:CSI2:C1_12350W_A:C1_12440W_A:C1_12570C_A:C1_12630C_A:C1_12750C_A:C1_12820C_A:RMP1:C1_13380W_A:C1_13820C_A:C1_14080W_A:C1_14330W_A:MPP10:FAV3:C2_00200W_A:C2_00280C_A:C2_00410C_A:C2_00820W_A:C2_01220W_A:C2_01820C_A:C2_02120W_A:C2_02420C_A:C2_02540W_A:C2_02630W_A:MET1:PRP3:SCH9:C2_04120C_A:TBF1:SUV3:C2_04700C_A:PZF1:CKA2:C2_05080C_A:MAK5:C2_05160C_A:C2_05830C_A:LAS1:MAK16:C2_06520C_A:C2_06660W_A:FHL1:C2_06850W_A:NOC4:RCL1:PRS5:C2_07920W_A:NSA1:C2_08180C_A:RRP8:C2_08530C_A:MSU1:RRP15:SMM1:C2_09920W_A:CWC22:C2_10740C_A:C2_10810W_A:C3_00100W_A:BUD21:C3_00660W_A:BMS1:UTP20:NCE103:C3_01310W_A:C3_02020W_A:C3_02040C_A:C3_02350W_A:C3_02670W_A:C3_02840W_A:C3_02850C_A:C3_03330C_A:HBR3:C3_04370C_A:MAK21:SFP1:NOP14:CEM1:C3_05160C_A:QDR2:C3_05800W_A:C3_06150W_A:ISW2:C3_06370C_A:NSA2:PRP5:C3_07550C_A:RAD4:C3_07800C_A:DUR4:RLP24:NMD5:C4_00690C_A:C4_00740W_A:RAT1:C4_01280C_A:C4_01500W_A:SLX4:HIT1:SAS10:RPC53:HCA4:C4_02880C_A:C4_03140C_A:C4_03720C_A:NUP84:C4_03830W_A:ECM1:C4_04520W_A:BAS1:C4_05260W_A:C4_05650W_A:C4_06790W_A:C4_07060W_A:C4_07150W_A:C5_00920W_A:BUD23:CYC3:C5_01430C_A:FYV5:SPB4:C5_02010C_A:C5_02070C_A:RIX7:C5_02440C_A:SPR28:UTP13:C5_03010W_A:RMS1:C5_03920C_A:C5_04120C_A:C5_04840C_A:C5_04910W_A:GRF10:C5_05340W_A:NOP5:C6_02230W_A:ALG11:C6_02430W_A:C6_02900C_A:POP4:C6_03440W_A:C6_04240W_A:NOP8:C7_00160C_A:C7_00220W_A:C7_00330C_A:DBP7:C7_01360C_A:C7_01950W_A:LIG1:C7_02460C_A:C7_02930C_A:C7_03400C_A:ISY1:C7_03590C_A:ENP1:C7_03850W_A:C7_03880C_A:C7_04150W_A:UTP18:CR_00460C_A:PWP2:CR_00830W_A:DAL81:CR_01410C_A:CR_01600C_A:CR_01700C_A:CR_02030C_A:CR_02420W_A:RRP9:CR_02890C_A:SRP40:SMC5:CR_03200C_A:CR_03360W_A:NCS2:YVH1:SMC1:CR_03940W_A:CR_04110W_A:CR_04710W_A:NOC2:CR_05550C_A:RNR3:DBP8:RFX1:CR_06230W_A:FGR50:CR_06450W_A:RRN11:CR_06680C_A:POL2:PIF1:FUN30:DBP6:IMP4:CR_08000C_A:RIO2:ATS1:CR_08330W_A:CR_08410W_A:TSR1:MPS1:CR_09740W_A:CR_09800C_A:CR_10260W_A:CR_10410C_A:DRS1:POP3 |
|-----|---------------------------------------------------------------------------------------|------------------------------|----------------------------------------|----------|-------|------------------------------------------------------------------------------------------------------------------------------------------------------------------------------------------------------------------------------------------------------------------------------------------------------------------------------------------------------------------------------------------------------------------------------------------------------------------------------------------------------------------------------------------------------------------------------------------------------------------------------------------------------------------------------------------------------------------------------------------------------------------------------------------------------------------------------------------------------------------------------------------------------------------------------------------------------------------------------------------------------------------------------------------------------------------------------------------------------------------------------------------------------------------------------------------------------------------------------------------------------------------------------------------------------------------------------------------------------------------------------------------------------------------------------------------------------------------------------------------------------------------------------------------------------------------------------------------------------------------------------------------------------------------------------------------------------------------------------------------------------------------------------------------------------------------------------------------------------------------------------------------------------------------------------------------------------------------------------------------------------------------------------------------------------------------------------------------------------------------------------------------------------------------------------------------------------------------------------------------------------------------------------------------------------------------------------------------------|

|     |                       |                              |                                        |          |       |                                                                                                                                                                                                                                                                                                                                                                                                                                                                                                                                                                                                                                                                                                                                                                                                                                                                                                                                                                                                                                                                                                                                                                                                                                                                                                                                                                                                                                                                                                                                                                                                                                                                                                                                                                                                                                                                                                                                                                                                                                                                                                                                                                                                                           |
|-----|-----------------------|------------------------------|----------------------------------------|----------|-------|---------------------------------------------------------------------------------------------------------------------------------------------------------------------------------------------------------------------------------------------------------------------------------------------------------------------------------------------------------------------------------------------------------------------------------------------------------------------------------------------------------------------------------------------------------------------------------------------------------------------------------------------------------------------------------------------------------------------------------------------------------------------------------------------------------------------------------------------------------------------------------------------------------------------------------------------------------------------------------------------------------------------------------------------------------------------------------------------------------------------------------------------------------------------------------------------------------------------------------------------------------------------------------------------------------------------------------------------------------------------------------------------------------------------------------------------------------------------------------------------------------------------------------------------------------------------------------------------------------------------------------------------------------------------------------------------------------------------------------------------------------------------------------------------------------------------------------------------------------------------------------------------------------------------------------------------------------------------------------------------------------------------------------------------------------------------------------------------------------------------------------------------------------------------------------------------------------------------------|
| 966 | RNA 5'-end processing | 236 out of 1061 genes, 22.2% | 421 out of 6473 background genes, 6.5% | 8.14E-81 | 0.00% | HBR1:CNS1:RPO41:C1_02090C_A:C1_02900C_A:RPP1:C1_03830C_A:C1_04040C_A:C1_04120C_A:NOP4:C1_04510W_A:REI1:TRY2:C1_05360C_A:C1_05380C_A:RSM22:C1_05650W_A:C1_06540C_A:NOP6:RIA1:C1_07660W_A:C1_07960W_A:MLT1:DIP2:C1_08630W_A:MSS116:CEF1:C1_09390W_A:C1_09710C_A:C1_09790C_A:FCY23:C1_10950C_A:C1_11000C_A:PET127:NEP1:MUP1:C1_11900C_A:CSI2:C1_12350W_A:C1_12440W_A:C1_12570C_A:C1_12630C_A:C1_12750C_A:C1_12820C_A:RMP1:C1_13380W_A:C1_13820C_A:C1_14080W_A:C1_14330W_A:MPP10:FAV3:C2_00200W_A:C2_00280C_A:C2_00410C_A:C2_00820W_A:C2_01820C_A:C2_02120W_A:C2_02420C_A:C2_02540W_A:C2_02630W_A:MET1:PRP3:SCH9:C2_04120C_A:TBF1:SU V3:C2_04700C_A:PZF1:CKA2:C2_05080C_A:MAK5:C2_05160C_A:C2_05830C_A:LAS1:MAK16:C2_06520C_A:C2_06660W_A:FHL1:C2_06850W_A:NOC4:RCL1:PRS5:C2_07920W_A:NSA1:C2_08180C_A:RRP8:MSU1:RRP15:SMM1:C2_09920W_A:CWC22:C2_10740C_A:C2_10810W_A:C3_00100W_A:BUD21:C3_00660W_A:BMS1:UTP20:NCE103:C3_01310W_A:C3_02020W_A:C3_02040C_A:C3_02670W_A:C3_02840W_A:C3_02850C_A:C3_03330C_A:HBR3:C3_04370C_A:MAK21:SFP1:NOP14:CEM1:C3_05160C_A:C3_05800W_A:C3_06150W_A:ISW2:C3_06370C_A:NSA2:PRP5:C3_07550C_A:RAD4:C3_07800C_A:DUR4:RLP24:NMD5:C4_00690C_A:C4_00740W_A:RAT1:C4_01280C_A:C4_01500W_A:SLX4:HIT1:SAS10:RPC53:HCA4:C4_02880C_A:C4_03140C_A:C4_03720C_A:C4_03830W_A:ECM1:C4_04520W_A:BAS1:C4_05260W_A:C4_05650W_A:C4_06790W_A:C4_07060W_A:C4_07150W_A:C5_00920W_A:CYC3:C5_01430C_A:FYV5:SPB4:C5_02010C_A:C5_02070C_A:RIX7:C5_02440C_A:SPR28:UTP13:C5_03010W_A:RMS1:C5_03920C_A:C5_04120C_A:C5_04840C_A:C5_04910W_A:GRF10:C5_05340W_A:NOP5:C6_02230W_A:ALG11:C6_02430W_A:C6_02900C_A:POP4:C6_03440W_A:C6_04240W_A:NOP8:C7_00160C_A:C7_00220W_A:C7_00330C_A:DBP7:C7_01360C_A:C7_01950W_A:C7_02460C_A:C7_02930C_A:C7_03400C_A:ISY1:C7_03590C_A:C7_03850W_A:C7_03880C_A:C7_04150W_A:UTP18:CR_00460C_A:PW P2:CR_00830W_A:DAL81:CR_01410C_A:CR_01600C_A:CR_01700C_A:CR_02030C_A:CR_02420W_A:RRP9:CR_02890C_A:SRP40:SMC5:CR_03200C_A:CR_03360W_A:NC S2:YVH1:CR_03940W_A:CR_04110W_A:CR_04710W_A:NOC2:CR_05550C_A:RNR3:DBP8:RFX1:RPL7:CR_06230W_A:FGR50:CR_06450W_A:RRN11:PIF1:FUN30:DBP6:IM P4:CR_08000C_A:RIO2:ATS1:CR_08330W_A:CR_08410W_A:MPS1:CR_09740W_A:CR_09800C_A:CR_10260W_A:CR_10410C_A:DRS1:POP3 |
|-----|-----------------------|------------------------------|----------------------------------------|----------|-------|---------------------------------------------------------------------------------------------------------------------------------------------------------------------------------------------------------------------------------------------------------------------------------------------------------------------------------------------------------------------------------------------------------------------------------------------------------------------------------------------------------------------------------------------------------------------------------------------------------------------------------------------------------------------------------------------------------------------------------------------------------------------------------------------------------------------------------------------------------------------------------------------------------------------------------------------------------------------------------------------------------------------------------------------------------------------------------------------------------------------------------------------------------------------------------------------------------------------------------------------------------------------------------------------------------------------------------------------------------------------------------------------------------------------------------------------------------------------------------------------------------------------------------------------------------------------------------------------------------------------------------------------------------------------------------------------------------------------------------------------------------------------------------------------------------------------------------------------------------------------------------------------------------------------------------------------------------------------------------------------------------------------------------------------------------------------------------------------------------------------------------------------------------------------------------------------------------------------------|

|     |                        |                              |                                        |          |       |                                                                                                                                                                                                                                                                                                                                                                                                                                                                                                                                                                                                                                                                                                                                                                                                                                                                                                                                                                                                                                                                                                                                                                                                                                                                                                                                                                                                                                                                                                                                                                                                                                                                                                                                                                                                                                                                                                                                                                                                                                                                                                                                                                                                                |
|-----|------------------------|------------------------------|----------------------------------------|----------|-------|----------------------------------------------------------------------------------------------------------------------------------------------------------------------------------------------------------------------------------------------------------------------------------------------------------------------------------------------------------------------------------------------------------------------------------------------------------------------------------------------------------------------------------------------------------------------------------------------------------------------------------------------------------------------------------------------------------------------------------------------------------------------------------------------------------------------------------------------------------------------------------------------------------------------------------------------------------------------------------------------------------------------------------------------------------------------------------------------------------------------------------------------------------------------------------------------------------------------------------------------------------------------------------------------------------------------------------------------------------------------------------------------------------------------------------------------------------------------------------------------------------------------------------------------------------------------------------------------------------------------------------------------------------------------------------------------------------------------------------------------------------------------------------------------------------------------------------------------------------------------------------------------------------------------------------------------------------------------------------------------------------------------------------------------------------------------------------------------------------------------------------------------------------------------------------------------------------------|
| 967 | rRNA 5'-end processing | 235 out of 1061 genes, 22.1% | 419 out of 6473 background genes, 6.5% | 1.70E-80 | 0.00% | HBR1:CNS1:RPO41:C1_02090C_A:C1_02900C_A:RPP1:C1_03830C_A:C1_04040C_A:C1_04120C_A:NOP4:C1_04510W_A:REI1:TRY2:C1_05360C_A:C1_05380C_A:RSM22:C1_05650W_A:C1_06540C_A:NOP6:RIA1:C1_07660W_A:C1_07960W_A:MLT1:DIP2:C1_08630W_A:MSS116:CEF1:C1_09390W_A:C1_09710C_A:C1_09790C_A:FCY23:C1_10950C_A:C1_11000C_A:NEP1:MUP1:C1_11900C_A:CSI2:C1_12350W_A:C1_12440W_A:C1_12570C_A:C1_12630C_A:C1_12750C_A:C1_12820C_A:RMP1:C1_13380W_A:C1_13820C_A:C1_14080W_A:C1_14330W_A:MPP10:FAV3:C2_00200W_A:C2_00280C_A:C2_00410C_A:C2_00820W_A:C2_01820C_A:C2_02120W_A:C2_02420C_A:C2_02540W_A:C2_02630W_A:MET1:PRP3:SCH9:C2_04120C_A:TBFI:SUV3:C2_04700C_A:PZF1:CKA2:C2_05080C_A:MAK5:C2_05160C_A:C2_05830C_A:LAS1:MAK16:C2_06520C_A:C2_06660W_A:FHL1:C2_06850W_A:NOC4:RCL1:PRS5:C2_07920W_A:NSA1:C2_08180C_A:RRP8:MSU1:RRP15:SMM1:C2_09920W_A:CWC22:C2_10740C_A:C2_10810W_A:C3_00100W_A:BUD21:C3_00660W_A:BMS1:UTP20:NCE103:C3_01310W_A:C3_02020W_A:C3_02040C_A:C3_02670W_A:C3_02840W_A:C3_02850C_A:C3_03330C_A:HBR3:C3_04370C_A:MAK21:SFP1:NOP14:CEM1:C3_05160C_A:C3_05800W_A:C3_06150W_A:ISW2:C3_06370C_A:NSA2:PRP5:C3_07550C_A:RAD4:C3_07800C_A:DUR4:RLP24:NMD5:C4_00690C_A:C4_00740W_A:RAT1:C4_01280C_A:C4_01500W_A:SLX4:HIT1:SAS10:RPC53:HCA4:C4_02880C_A:C4_03140C_A:C4_03720C_A:C4_03830W_A:ECM1:C4_04520W_A:BAS1:C4_05260W_A:C4_05650W_A:C4_06790W_A:C4_07060W_A:C4_07150W_A:C5_00920W_A:CYC3:C5_01430C_A:FYV5:SPB4:C5_02010C_A:C5_02070C_A:RIX7:C5_02440C_A:SPR28:UTP13:C5_03010W_A:RMS1:C5_03920C_A:C5_04120C_A:C5_04840C_A:C5_04910W_A:GRF10:C5_05340W_A:NOP5:C6_02230W_A:ALG11:C6_02430W_A:C6_02900C_A:POP4:C6_03440W_A:C6_04240W_A:NOP8:C7_00160C_A:C7_00220W_A:C7_00330C_A:DBP7:C7_01360C_A:C7_01950W_A:C7_02460C_A:C7_02930C_A:C7_03400C_A:ISY1:C7_03590C_A:C7_03850W_A:C7_03880C_A:C7_04150W_A:UTP18:CR_00460C_A:PWP2:CR_00830W_A:DAL81:CR_01410C_A:CR_01600C_A:CR_01700C_A:CR_02030C_A:CR_02420W_A:RRP9:CR_02890C_A:SRP40:SMC5:CR_03200C_A:CR_03360W_A:NCS2:YVH1:CR_03940W_A:CR_04110W_A:CR_04710W_A:NOC2:CR_05550C_A:RNR3:DBP8:RFX1:RPL7:CR_06230W_A:FGR50:CR_06450W_A:RRN11:PIF1:FUN30:DBP6:IMP4:CR_08000C_A:RIO2:ATS1:CR_08330W_A:CR_08410W_A:MPS1:CR_09740W_A:CR_09800C_A:CR_10260W_A:CR_10410C_A:DRS1:POP3 |
|-----|------------------------|------------------------------|----------------------------------------|----------|-------|----------------------------------------------------------------------------------------------------------------------------------------------------------------------------------------------------------------------------------------------------------------------------------------------------------------------------------------------------------------------------------------------------------------------------------------------------------------------------------------------------------------------------------------------------------------------------------------------------------------------------------------------------------------------------------------------------------------------------------------------------------------------------------------------------------------------------------------------------------------------------------------------------------------------------------------------------------------------------------------------------------------------------------------------------------------------------------------------------------------------------------------------------------------------------------------------------------------------------------------------------------------------------------------------------------------------------------------------------------------------------------------------------------------------------------------------------------------------------------------------------------------------------------------------------------------------------------------------------------------------------------------------------------------------------------------------------------------------------------------------------------------------------------------------------------------------------------------------------------------------------------------------------------------------------------------------------------------------------------------------------------------------------------------------------------------------------------------------------------------------------------------------------------------------------------------------------------------|

|           |                                   |                                       |                                                     |          |       |                                                                                                                                                                                                                                                                                                                                                                                                                                                                                                                                                                                                                                                                                                                                                                                                                                                                                                                                                                                                                                                                                                                                                                                                                                                                                                                                                                                                                                                                                                                                                                                                                                                                                                                                                                                                                                                                                                                                                                                                                                                                                                                                                                                                                                                                                                                                            |
|-----------|-----------------------------------|---------------------------------------|-----------------------------------------------------|----------|-------|--------------------------------------------------------------------------------------------------------------------------------------------------------------------------------------------------------------------------------------------------------------------------------------------------------------------------------------------------------------------------------------------------------------------------------------------------------------------------------------------------------------------------------------------------------------------------------------------------------------------------------------------------------------------------------------------------------------------------------------------------------------------------------------------------------------------------------------------------------------------------------------------------------------------------------------------------------------------------------------------------------------------------------------------------------------------------------------------------------------------------------------------------------------------------------------------------------------------------------------------------------------------------------------------------------------------------------------------------------------------------------------------------------------------------------------------------------------------------------------------------------------------------------------------------------------------------------------------------------------------------------------------------------------------------------------------------------------------------------------------------------------------------------------------------------------------------------------------------------------------------------------------------------------------------------------------------------------------------------------------------------------------------------------------------------------------------------------------------------------------------------------------------------------------------------------------------------------------------------------------------------------------------------------------------------------------------------------------|
| 3447<br>1 | ncRNA<br>5'-end<br>processin<br>g | 235 out of<br>1061<br>genes,<br>22.1% | 420 out of<br>6473<br>backgroun<br>d genes,<br>6.5% | 3.34E-80 | 0.00% | HBR1:CNS1:RPO41:C1_02090C_A:C1_02900C_A:RPP1:C1_03830C_A:C1_04040C_A:<br>C1_04120C_A:NOP4:C1_04510W_A:REI1:TRY2:C1_05360C_A:C1_05380C_A:RSM22<br>:C1_05650W_A:C1_06540C_A:NOP6:RIA1:C1_07660W_A:C1_07960W_A:MLT1:DIP<br>2:C1_08630W_A:MSS116:CEF1:C1_09390W_A:C1_09710C_A:C1_09790C_A:FCY23:<br>C1_10950C_A:C1_11000C_A:NEP1:MUP1:C1_11900C_A:CSI2:C1_12350W_A:C1_12<br>440W_A:C1_12570C_A:C1_12630C_A:C1_12750C_A:C1_12820C_A:RMP1:C1_1338<br>0W_A:C1_13820C_A:C1_14080W_A:C1_14330W_A:MPP10:FAV3:C2_00200W_A:C2<br>_00280C_A:C2_00410C_A:C2_00820W_A:C2_01820C_A:C2_02120W_A:C2_02420C<br>_A:C2_02540W_A:C2_02630W_A:MET1:PRP3:SCH9:C2_04120C_A:TBFI:SUV3:C2_0<br>4700C_A:PZF1:CKA2:C2_05080C_A:MAK5:C2_05160C_A:C2_05830C_A:LAS1:MAK1<br>6:C2_06520C_A:C2_06660W_A:FHL1:C2_06850W_A:NOC4:RCL1:PRS5:C2_07920W<br>_A:NSA1:C2_08180C_A:RRP8:MSU1:RRP15:SMM1:C2_09920W_A:CWC22:C2_1074<br>0C_A:C2_10810W_A:C3_00100W_A:BUD21:C3_00660W_A:BMS1:UTP20:NCE103:C<br>3_01310W_A:C3_02020W_A:C3_02040C_A:C3_02670W_A:C3_02840W_A:C3_0285<br>0C_A:C3_03330C_A:HBR3:C3_04370C_A:MAK21:SFP1:NOP14:CEM1:C3_05160C_A:<br>C3_05800W_A:C3_06150W_A:ISW2:C3_06370C_A:NSA2:PRP5:C3_07550C_A:RAD4:<br>C3_07800C_A:DUR4:RLP24:NMD5:C4_00690C_A:C4_00740W_A:RAT1:C4_01280C_<br>A:C4_01500W_A:SLX4:HIT1:SAS10:RPC53:HCA4:C4_02880C_A:C4_03140C_A:C4_03<br>720C_A:C4_03830W_A:ECM1:C4_04520W_A:BAS1:C4_05260W_A:C4_05650W_A:C<br>4_06790W_A:C4_07060W_A:C4_07150W_A:C5_00920W_A:CYC3:C5_01430C_A:FY<br>V5:SPB4:C5_02010C_A:C5_02070C_A:RIX7:C5_02440C_A:SPR28:UTP13:C5_03010<br>W_A:RMS1:C5_03920C_A:C5_04120C_A:C5_04840C_A:C5_04910W_A:GRF10:C5_0<br>5340W_A:NOP5:C6_02230W_A:ALG11:C6_02430W_A:C6_02900C_A:POP4:C6_034<br>40W_A:C6_04240W_A:NOP8:C7_00160C_A:C7_00220W_A:C7_00330C_A:DBP7:C7<br>_01360C_A:C7_01950W_A:C7_02460C_A:C7_02930C_A:C7_03400C_A:ISY1:C7_035<br>90C_A:C7_03850W_A:C7_03880C_A:C7_04150W_A:UTP18:CR_00460C_A:PWP2:CR<br>_00830W_A:DAL81:CR_01410C_A:CR_01600C_A:CR_01700C_A:CR_02030C_A:CR_0<br>2420W_A:RRP9:CR_02890C_A:SRP40:SMC5:CR_03200C_A:CR_03360W_A:NCS2:YV<br>H1:CR_03940W_A:CR_04110W_A:CR_04710W_A:NOC2:CR_05550C_A:RNR3:DBP8:<br>RFX1:RPL7:CR_06230W_A:FGR50:CR_06450W_A:RRN11:PIF1:FUN30:DBP6:IMP4:CR<br>_08000C_A:RIO2:ATS1:CR_08330W_A:CR_08410W_A:MPS1:CR_09740W_A:CR_098<br>00C_A:CR_10260W_A:CR_10410C_A:DRS1:POP3 |
|-----------|-----------------------------------|---------------------------------------|-----------------------------------------------------|----------|-------|--------------------------------------------------------------------------------------------------------------------------------------------------------------------------------------------------------------------------------------------------------------------------------------------------------------------------------------------------------------------------------------------------------------------------------------------------------------------------------------------------------------------------------------------------------------------------------------------------------------------------------------------------------------------------------------------------------------------------------------------------------------------------------------------------------------------------------------------------------------------------------------------------------------------------------------------------------------------------------------------------------------------------------------------------------------------------------------------------------------------------------------------------------------------------------------------------------------------------------------------------------------------------------------------------------------------------------------------------------------------------------------------------------------------------------------------------------------------------------------------------------------------------------------------------------------------------------------------------------------------------------------------------------------------------------------------------------------------------------------------------------------------------------------------------------------------------------------------------------------------------------------------------------------------------------------------------------------------------------------------------------------------------------------------------------------------------------------------------------------------------------------------------------------------------------------------------------------------------------------------------------------------------------------------------------------------------------------------|



|     |                                                                                                  |                              |                                        |          |       |                                                                                                                                                                                                                                                                                                                                                                                                                                                                                                                                                                                                                                                                                                                                                                                                                                                                                                                                                                                                                                                                                                                                                                                                                                                                                                                                                                                                                                                                                                                                                                                                                                                                                                                                                                                                                                                                                                                                                                                                                                                                                                                                                                                                      |
|-----|--------------------------------------------------------------------------------------------------|------------------------------|----------------------------------------|----------|-------|------------------------------------------------------------------------------------------------------------------------------------------------------------------------------------------------------------------------------------------------------------------------------------------------------------------------------------------------------------------------------------------------------------------------------------------------------------------------------------------------------------------------------------------------------------------------------------------------------------------------------------------------------------------------------------------------------------------------------------------------------------------------------------------------------------------------------------------------------------------------------------------------------------------------------------------------------------------------------------------------------------------------------------------------------------------------------------------------------------------------------------------------------------------------------------------------------------------------------------------------------------------------------------------------------------------------------------------------------------------------------------------------------------------------------------------------------------------------------------------------------------------------------------------------------------------------------------------------------------------------------------------------------------------------------------------------------------------------------------------------------------------------------------------------------------------------------------------------------------------------------------------------------------------------------------------------------------------------------------------------------------------------------------------------------------------------------------------------------------------------------------------------------------------------------------------------------|
| 472 | endonuclease cleavage to generate mature 5'-end of SSU-rRNA from (SSU-rRNA, 5.8S rRNA, LSU-rRNA) | 233 out of 1061 genes, 22.0% | 417 out of 6473 background genes, 6.4% | 2.87E-79 | 0.00% | HBR1:CNS1:RPO41:C1_02090C_A:C1_02900C_A:RPP1:C1_03830C_A:C1_04040C_A:C1_04120C_A:NOP4:C1_04510W_A:REI1:TRY2:C1_05360C_A:C1_05380C_A:RSM22:C1_05650W_A:C1_06540C_A:NOP6:RIA1:C1_07660W_A:C1_07960W_A:MLT1:DIP2:C1_08630W_A:MSS116:CEF1:C1_09390W_A:C1_09710C_A:C1_09790C_A:FCY23:C1_10950C_A:C1_11000C_A:NEP1:MUP1:C1_11900C_A:C1_12350W_A:C1_12440W_A:C1_12570C_A:C1_12630C_A:C1_12750C_A:C1_12820C_A:RMP1:C1_13380W_A:C1_13820C_A:C1_14080W_A:C1_14330W_A:MPP10:FAV3:C2_00200W_A:C2_00280C_A:C2_00410C_A:C2_00820W_A:C2_01820C_A:C2_02120W_A:C2_02420C_A:C2_02540W_A:C2_02630W_A:MET1:PRP3:SCH9:C2_04120C_A:TBF1:SUV3:C2_04700C_A:PZF1:CKA2:C2_05080C_A:MAK5:C2_05160C_A:C2_05830C_A:LAS1:MAK16:C2_06520C_A:C2_06660W_A:FHL1:C2_06850W_A:NOC4:RCL1:PRS5:C2_07920W_A:NSA1:C2_08180C_A:RRP8:MSU1:RRP15:SMM1:C2_09920W_A:CWC22:C2_10740C_A:C2_10810W_A:C3_00100W_A:BUD21:C3_00660W_A:BMS1:UTP20:NCE103:C3_01310W_A:C3_02020W_A:C3_02040C_A:C3_02670W_A:C3_02840W_A:C3_02850C_A:C3_03330C_A:HBR3:C3_04370C_A:MAK21:SFP1:NOP14:CEM1:C3_05160C_A:C3_05800W_A:C3_06150W_A:ISW2:C3_06370C_A:NSA2:PRP5:C3_07550C_A:RAD4:C3_07800C_A:DUR4:RLP24:NMD5:C4_00690C_A:C4_00740W_A:RAT1:C4_01280C_A:C4_01500W_A:SLX4:HIT1:SAS10:RPC53:HCA4:C4_02880C_A:C4_03140C_A:C4_03720C_A:C4_03830W_A:ECM1:C4_04520W_A:BAS1:C4_05260W_A:C4_05650W_A:C4_06790W_A:C4_07060W_A:C4_07150W_A:C5_00920W_A:CYC3:C5_01430C_A:FYV5:SPB4:C5_02010C_A:C5_02070C_A:RIX7:C5_02440C_A:SPR28:UTP13:C5_03010W_A:RMS1:C5_03920C_A:C5_04120C_A:C5_04840C_A:C5_04910W_A:GRF10:C5_05340W_A:NOP5:C6_02230W_A:ALG11:C6_02430W_A:C6_02900C_A:POP4:C6_03440W_A:C6_04240W_A:NOP8:C7_00160C_A:C7_00220W_A:C7_00330C_A:DBP7:C7_01360C_A:C7_01950W_A:C7_02460C_A:C7_02930C_A:C7_03400C_A:ISY1:C7_03590C_A:C7_03850W_A:C7_03880C_A:C7_04150W_A:UTP18:CR_00460C_A:PWP2:CR_00830W_A:DAL81:CR_01410C_A:CR_01600C_A:CR_01700C_A:CR_02030C_A:CR_02420W_A:RRP9:CR_02890C_A:SRP40:SMC5:CR_03200C_A:CR_03360W_A:NCS2:YVH1:CR_03940W_A:CR_04110W_A:CR_04710W_A:NOC2:CR_05550C_A:RNR3:DBP8:RFX1:CR_06230W_A:FGR50:CR_06450W_A:RRN11:PIF1:FUN30:DBP6:IMP4:CR_08000C_A:RIO2:ATS1:CR_08330W_A:CR_08410W_A:MPS1:CR_09740W_A:CR_09800C_A:CR_10260W_A:CR_10410C_A:DRS1:POP3 |
|-----|--------------------------------------------------------------------------------------------------|------------------------------|----------------------------------------|----------|-------|------------------------------------------------------------------------------------------------------------------------------------------------------------------------------------------------------------------------------------------------------------------------------------------------------------------------------------------------------------------------------------------------------------------------------------------------------------------------------------------------------------------------------------------------------------------------------------------------------------------------------------------------------------------------------------------------------------------------------------------------------------------------------------------------------------------------------------------------------------------------------------------------------------------------------------------------------------------------------------------------------------------------------------------------------------------------------------------------------------------------------------------------------------------------------------------------------------------------------------------------------------------------------------------------------------------------------------------------------------------------------------------------------------------------------------------------------------------------------------------------------------------------------------------------------------------------------------------------------------------------------------------------------------------------------------------------------------------------------------------------------------------------------------------------------------------------------------------------------------------------------------------------------------------------------------------------------------------------------------------------------------------------------------------------------------------------------------------------------------------------------------------------------------------------------------------------------|

|       |             |                              |                                        |          |       |                                                                                                                                                                                                                                                                                                                                                                                                                                                                                                                                                                                                                                                                                                                                                                                                                                                                                                                                                                                                                                                                                                                                                                                                                                                                                                                                                                                                                                                                                                                                                                                                                                                                                                                                                                                                                                                                                                                                                                                                                                                                                                                                                                                                                           |
|-------|-------------|------------------------------|----------------------------------------|----------|-------|---------------------------------------------------------------------------------------------------------------------------------------------------------------------------------------------------------------------------------------------------------------------------------------------------------------------------------------------------------------------------------------------------------------------------------------------------------------------------------------------------------------------------------------------------------------------------------------------------------------------------------------------------------------------------------------------------------------------------------------------------------------------------------------------------------------------------------------------------------------------------------------------------------------------------------------------------------------------------------------------------------------------------------------------------------------------------------------------------------------------------------------------------------------------------------------------------------------------------------------------------------------------------------------------------------------------------------------------------------------------------------------------------------------------------------------------------------------------------------------------------------------------------------------------------------------------------------------------------------------------------------------------------------------------------------------------------------------------------------------------------------------------------------------------------------------------------------------------------------------------------------------------------------------------------------------------------------------------------------------------------------------------------------------------------------------------------------------------------------------------------------------------------------------------------------------------------------------------------|
| 36260 | RNA capping | 236 out of 1061 genes, 22.2% | 427 out of 6473 background genes, 6.6% | 4.43E-79 | 0.00% | HBR1:CNS1:RPO41:C1_02090C_A:C1_02900C_A:RPP1:C1_03830C_A:C1_04040C_A:C1_04120C_A:NOP4:C1_04510W_A:REI1:TRY2:C1_05360C_A:C1_05380C_A:RSM22:C1_05650W_A:C1_06540C_A:NOP6:RIA1:C1_07660W_A:C1_07960W_A:MLT1:DIP2:C1_08630W_A:MSS116:CEF1:C1_09390W_A:C1_09710C_A:C1_09790C_A:FCY23:C1_10950C_A:C1_11000C_A:NEP1:MUP1:C1_11900C_A:CSI2:C1_12350W_A:C1_12440W_A:C1_12570C_A:C1_12630C_A:C1_12750C_A:C1_12820C_A:RMP1:C1_13380W_A:C1_13820C_A:C1_14080W_A:C1_14330W_A:MPP10:FAV3:C2_00200W_A:C2_00280C_A:C2_00410C_A:C2_00820W_A:C2_01820C_A:C2_02120W_A:C2_02420C_A:C2_02540W_A:C2_02630W_A:MET1:PRP3:SCH9:C2_04120C_A:TBFI:SUV3:C2_04700C_A:PZF1:CKA2:C2_05080C_A:MAK5:C2_05160C_A:C2_05830C_A:LAS1:MAK16:C2_06520C_A:C2_06660W_A:FHL1:C2_06850W_A:NOC4:C2_07360W_A:RCL1:PRSS5:C2_07920W_A:NSA1:C2_08180C_A:RRP8:MSU1:RRP15:SMM1:C2_09920W_A:WC22:C2_10740C_A:C2_10810W_A:C3_00100W_A:BUD21:C3_00660W_A:BMS1:UTP20:NCE103:C3_01310W_A:C3_02020W_A:C3_02040C_A:C3_02670W_A:C3_02840W_A:C3_02850C_A:C3_03330C_A:HBR3:C3_04370C_A:MAK21:SFP1:NOP14:CEM1:C3_05160C_A:C3_05800W_A:C3_06150W_A:ISW2:C3_06370C_A:NSA2:PRP5:C3_07550C_A:RAD4:C3_07800C_A:DUR4:RLP24:NMD5:C4_00690C_A:C4_00740W_A:RAT1:C4_01280C_A:C4_01500W_A:SLX4:HIT1:SAS10:RPC53:HCA4:C4_02880C_A:C4_03140C_A:C4_03720C_A:C4_03830W_A:ECM1:C4_04520W_A:BAS1:C4_05260W_A:C4_05650W_A:C4_06790W_A:C4_07060W_A:C4_07150W_A:C5_00920W_A:CYC3:C5_01430C_A:FYV5:SPB4:C5_02010C_A:C5_02070C_A:RIX7:C5_02440C_A:SPR28:UTP13:C5_03010W_A:RMS1:C5_03920C_A:C5_04120C_A:C5_04840C_A:C5_04910W_A:GRF10:C5_05340W_A:NOP5:C6_02230W_A:ALG11:C6_02430W_A:C6_02900C_A:POP4:C6_03440W_A:C6_04240W_A:NOP8:C7_00160C_A:C7_00220W_A:C7_00330C_A:DBP7:C7_01360C_A:C7_01950W_A:C7_02460C_A:C7_02930C_A:C7_03400C_A:ISY1:C7_03590C_A:C7_03850W_A:C7_03880C_A:C7_04150W_A:UTP18:CR_00460C_A:PWP2:CR_00830W_A:DAL81:CR_01410C_A:CR_01600C_A:CR_01700C_A:CR_02030C_A:CR_02420W_A:RRP9:CR_02890C_A:SRP40:SMC5:CR_03200C_A:CR_0360W_A:NCS2:YVH1:CR_03940W_A:CR_04110W_A:CR_04710W_A:NOC2:CR_05550C_A:RNR3:DBP8:RFX1:RPL7:CR_06230W_A:FGR50:CR_06450W_A:RRN11:PIF1:FUN30:DBP6:IMP4:CR_08000C_A:RIO2:ATS1:CR_08330W_A:CR_08410W_A:MPS1:CR_09740W_A:CR_09800C_A:CR_10260W_A:CR_10410C_A:DRS1:POP3 |
|-------|-------------|------------------------------|----------------------------------------|----------|-------|---------------------------------------------------------------------------------------------------------------------------------------------------------------------------------------------------------------------------------------------------------------------------------------------------------------------------------------------------------------------------------------------------------------------------------------------------------------------------------------------------------------------------------------------------------------------------------------------------------------------------------------------------------------------------------------------------------------------------------------------------------------------------------------------------------------------------------------------------------------------------------------------------------------------------------------------------------------------------------------------------------------------------------------------------------------------------------------------------------------------------------------------------------------------------------------------------------------------------------------------------------------------------------------------------------------------------------------------------------------------------------------------------------------------------------------------------------------------------------------------------------------------------------------------------------------------------------------------------------------------------------------------------------------------------------------------------------------------------------------------------------------------------------------------------------------------------------------------------------------------------------------------------------------------------------------------------------------------------------------------------------------------------------------------------------------------------------------------------------------------------------------------------------------------------------------------------------------------------|

|      |                      |                              |                                          |          |       |                                                                                                                                                                                                                                                                                                                                                                                                                                                                                                                                                                                                                                                                                                                                                                                                                                                                                                                                                                                                                                                                                                                                                                                                                                                                                                                                                                                                                                                                                                                                                                                                                                                                                                                                                                                                                                                                                                                                                                                                                                                                                                                                                                                                                                                                                                                                                                                                                                                                                                                                                                                                                                                                           |
|------|----------------------|------------------------------|------------------------------------------|----------|-------|---------------------------------------------------------------------------------------------------------------------------------------------------------------------------------------------------------------------------------------------------------------------------------------------------------------------------------------------------------------------------------------------------------------------------------------------------------------------------------------------------------------------------------------------------------------------------------------------------------------------------------------------------------------------------------------------------------------------------------------------------------------------------------------------------------------------------------------------------------------------------------------------------------------------------------------------------------------------------------------------------------------------------------------------------------------------------------------------------------------------------------------------------------------------------------------------------------------------------------------------------------------------------------------------------------------------------------------------------------------------------------------------------------------------------------------------------------------------------------------------------------------------------------------------------------------------------------------------------------------------------------------------------------------------------------------------------------------------------------------------------------------------------------------------------------------------------------------------------------------------------------------------------------------------------------------------------------------------------------------------------------------------------------------------------------------------------------------------------------------------------------------------------------------------------------------------------------------------------------------------------------------------------------------------------------------------------------------------------------------------------------------------------------------------------------------------------------------------------------------------------------------------------------------------------------------------------------------------------------------------------------------------------------------------------|
| 9058 | biosynthetic process | 702 out of 1061 genes, 66.2% | 2586 out of 6473 background genes, 40.0% | 2.00E-76 | 0.00% | RIM8:LEU4:HBR1:C1_00510W_A:CNS1:RPO41:SPE1:NRM1:RRS1:TRI1:HMT1:C1_01150C_A:C1_01160C_A:TRM2:ABC1:C1_01530C_A:CYS4:C1_02090C_A:ABP140:CWH8:C1_02380C_A:C1_02450C_A:SNZ1:SNO1:HOM6:LYS2:PDE2:MIA40:C1_02900C_A:C1_02970W_A:TSR2:C1_03370W_A:C1_03540C_A:C1_03630W_A:C1_03790C_A:RPP1:C1_03830C_A:KTR4:C1_04040C_A:C1_04120C_A:ERB1:NOP4:C1_04510W_A:C1_04530C_A:C1_04710C_A:MRPL37:C1_04970W_A:RHD1:ARG2:RRP6:REI1:TRY2:ARO4:C1_05220C_A:C1_05270C_A:C1_05360C_A:C1_05380C_A:RSM22:RPS27A:C1_05630C_A:FAL1:C1_05650W_A:RAD10:C1_05990C_A:BUD16:C1_06530C_A:C1_06540C_A:NOP6:C1_06760C_A:RIA1:YMC1:C1_07340W_A:C1_07470C_A:LHP1:C1_07510W_A:C1_07660W_A:ADE4:GCS1:ADE5,7:MRPL3:ERD1:C1_07950C_A:C1_07960W_A:FUN12:DRG1:CAT8:MLT1:DIP2:SAM4:GCR3:UPC2:C1_08520C_A:GCD6:C1_08630W_A:MSS116:C1_08890C_A:CEF1:C1_09390W_A:GUA1:C1_09610W_A:C1_09710C_A:C1_09790C_A:BUD31:C1_09910C_A:PDC2:DBP3:MNN23:C1_10080W_A:C1_10200C_A:C1_10340W_A:FCY23:C1_10620W_A:RPA190:C1_10690W_A:C1_10920W_A:C1_10950C_A:C1_10970W_A:C1_11000C_A:PET127:FGR39:NEP1:KRR1:SAM2:C1_11610C_A:C1_11790W_A:MUP1:C1_11880W_A:C1_11900C_A:C1_11910W_A:SER33:TRP3:C1_12280C_A:CSI2:MRPS9:C1_12350W_A:WRS1:C1_12440W_A:C1_12570C_A:C1_12630C_A:C1_12670C_A:C1_12750C_A:C1_12760W_A:FEN1:C1_12820C_A:RPL14:C1_13060C_A:REX3:C1_13330C_A:RMP1:C1_13380W_A:AGC1:MCU1:C1_13820C_A:C1_14080W_A:C1_14330W_A:MPP10:FAV3:C2_00200W_A:C2_00280C_A:C2_00390C_A:C2_00410C_A:C2_00820W_A:C2_00840W_A:MXR1:C2_01070W_A:C2_01220W_A:C2_01420C_A:APT1:REX2:C2_01740C_A:C2_01820C_A:PRP39:C2_01860C_A:C2_01870C_A:ARO3:C2_02120W_A:C2_02270C_A:C2_02420C_A:UTP21:UTP22:PRS1:C2_02540W_A:C2_02630W_A:PDR17:SER2:C2_02930C_A:MET1:BNA31:SM P3:PRP3:C2_03560C_A:MNN42:GPI13:SCH9:C2_03950W_A:C2_04120C_A:TBF1:BAT21:SUV3:RIM2:C2_04570W_A:SNU114:C2_04700C_A:C2_04820W_A:PZF1:CKA2:C2_05050C_A:C2_05080C_A:MAK5:C2_05160C_A:CDC21:RPF2:C2_05270W_A:RPC40:KTI11:C2_05670C_A:C2_05750W_A:C2_05830C_A:C2_05840W_A:IDP1:LAS1:ECM17:ILV1:SER1:MAK16:C2_06480W_A:C2_06520C_A:C2_06530W_A:VAS1:C2_06650C_A:C2_06660W_A:RPL11:FHL1:C2_06850W_A:C2_06950C_A:SPE3:AAH1:NOC4:C2_07360W_A:C2_07410W_A:RCL1:C2_07680W_A:PHO86:PRS5:C2_07920W_A:NSA1:C2_08180C_A:EAF3:RRP8:C2_08530C_A:MSU1:UTP15:MFG1:ASN1:C2_09160W_A:C2_09180W_A:MED18:C2_09310C_A:PES1:TAZ1:RRP15:C2_09500W_A:C2_09660W_A:LEU42:SMM1:C2_09920W_A:CWC22:UBP8:GPD1:PUS7:HEM3:C2_10740C_A:R P C11:C2_10810W_A:RPS24:C3_00100W_A:ULP3:RHR2:UTP8:BUD21:SOF1:C3_00660W_A:C3_00830C_A:BMS1:ARP9:UTP20:NCE103:C3_01310W_A:URA3:MET18:RKI1:R PS7A:C3_01520C_A:C3_01560W_A:C3_02020W_A:C3_02040C_A:UTP4:C3_02180C_A:ILV2:C3_02350W_A:PHA2:C3_02670W_A:C3_02750W_A:C3_02840W_A:C3_028 |
|------|----------------------|------------------------------|------------------------------------------|----------|-------|---------------------------------------------------------------------------------------------------------------------------------------------------------------------------------------------------------------------------------------------------------------------------------------------------------------------------------------------------------------------------------------------------------------------------------------------------------------------------------------------------------------------------------------------------------------------------------------------------------------------------------------------------------------------------------------------------------------------------------------------------------------------------------------------------------------------------------------------------------------------------------------------------------------------------------------------------------------------------------------------------------------------------------------------------------------------------------------------------------------------------------------------------------------------------------------------------------------------------------------------------------------------------------------------------------------------------------------------------------------------------------------------------------------------------------------------------------------------------------------------------------------------------------------------------------------------------------------------------------------------------------------------------------------------------------------------------------------------------------------------------------------------------------------------------------------------------------------------------------------------------------------------------------------------------------------------------------------------------------------------------------------------------------------------------------------------------------------------------------------------------------------------------------------------------------------------------------------------------------------------------------------------------------------------------------------------------------------------------------------------------------------------------------------------------------------------------------------------------------------------------------------------------------------------------------------------------------------------------------------------------------------------------------------------------|

|  |  |  |  |  |  |                                                                                                                                                                                                                                                                                                                                                                                                                                                                                                                                                                                                                                                                                                                                                                                                                                                                                                                                                                                                                                                                                                                                                                                                                                                                                                                                                                                                                                                                                                                                                                                                                                                                                                                                                                                                                                                                                                                                                                                                                                                                                                                                                                                                                                                                                                                                                                                                                                                                                                                                                                                                                                                                                                                                                                                                                          |
|--|--|--|--|--|--|--------------------------------------------------------------------------------------------------------------------------------------------------------------------------------------------------------------------------------------------------------------------------------------------------------------------------------------------------------------------------------------------------------------------------------------------------------------------------------------------------------------------------------------------------------------------------------------------------------------------------------------------------------------------------------------------------------------------------------------------------------------------------------------------------------------------------------------------------------------------------------------------------------------------------------------------------------------------------------------------------------------------------------------------------------------------------------------------------------------------------------------------------------------------------------------------------------------------------------------------------------------------------------------------------------------------------------------------------------------------------------------------------------------------------------------------------------------------------------------------------------------------------------------------------------------------------------------------------------------------------------------------------------------------------------------------------------------------------------------------------------------------------------------------------------------------------------------------------------------------------------------------------------------------------------------------------------------------------------------------------------------------------------------------------------------------------------------------------------------------------------------------------------------------------------------------------------------------------------------------------------------------------------------------------------------------------------------------------------------------------------------------------------------------------------------------------------------------------------------------------------------------------------------------------------------------------------------------------------------------------------------------------------------------------------------------------------------------------------------------------------------------------------------------------------------------------|
|  |  |  |  |  |  | <p>50C_A:MET13:C3_03070W_A:C3_03110W_A:C3_03330C_A:YAH1:C3_03560W_A:H<br/>BR3:RAD53:C3_04370C_A:C3_04380C_A:ADE2:MAK21:RPS15:RPP2B:ARV1:SFP1:NO<br/>P14:CEM1:C3_05140C_A:C3_05160C_A:RPL8B:C3_05280C_A:C3_05380W_A:GPI1:C<br/>3_05440C_A:QDR2:C3_05800W_A:C3_05860C_A:TRM12:C3_05900W_A:CTA4:NOG<br/>1:C3_06150W_A:C3_06240C_A:DOT1:ISW2:C3_06370C_A:NSA2:OPI3:PRP5:C3_068<br/>30C_A:RPS12:NOP13:C3_07400W_A:C3_07550C_A:C3_07570C_A:RIT1:RAD4:UTP9:<br/>C3_07800C_A:HIS4:MET15:DUR4:RLP24:NMD5:HIS5:C4_00690C_A:C4_00740W_A:<br/>C4_00800W_A:C4_00810C_A:C4_00880W_A:ARO1:C4_00940W_A:PTC8:RAT1:AAT<br/>22:C4_01280C_A:PGA53:ILV6:PWP1:NIP1:C4_01500W_A:TOA2:HSX11:TIM10:ZCF25<br/>:C4_02400C_A:SLX4:HIT1:SAS10:RPC53:HCA4:C4_02850W_A:ZUO1:C4_02880C_A:N<br/>AN1:C4_03140C_A:C4_03170W_A:DAO2:C4_03410W_A:RAD2:C4_03720C_A:C4_03<br/>730C_A:C4_03740W_A:NUP84:C4_03830W_A:RRP42:RAM1:ECM1:C4_04130W_A:<br/>DUO1:C4_04390W_A:C4_04520W_A:SSZ1:BAS1:C4_04810C_A:AGP3:RPL30:C4_052<br/>30C_A:C4_05260W_A:C4_05360C_A:OFD1:HOM3:C4_05650W_A:TRP5:C4_06210C<br/>_A:C4_06410W_A:NOP1:C4_06790W_A:C4_06950W_A:MET16:C4_07060W_A:TRP<br/>4:C4_07140W_A:C4_07150W_A:C5_00030W_A:C5_00260W_A:C5_00280C_A:DUS4<br/>:C5_00320W_A:MRP17:MET14:RMT2:SPE2:C5_00820W_A:C5_00920W_A:BUD23:C<br/>YC3:C5_01140C_A:PUS4:C5_01430C_A:FYV5:SPB4:C5_01610W_A:CCN1:C5_01700<br/>W_A:C5_01930W_A:C5_02010C_A:C5_02070C_A:RIX7:THR4:C5_02440C_A:TIF5:SP<br/>R28:UTP13:C5_02590C_A:BUR2:CKB2:MSW1:C5_02780W_A:C5_02820C_A:C5_030<br/>10W_A:RMS1:CAM1-</p> <p>1:C5_03290C_A:PCL1:RPO26:FUR1:C5_03400C_A:C5_03460C_A:C5_03530C_A:C5_<br/>03550W_A:MDJ1:C5_03840W_A:C5_03920C_A:C5_03970W_A:C5_04120C_A:SAH1<br/>:C5_04290C_A:C5_04340W_A:URA7:CSU57:MSM1:C5_04720C_A:HYS2:HAS1:C5_04<br/>840C_A:C5_04910W_A:GRF10:C5_05250C_A:SDH4:HIS1:C5_05340W_A:ILV3:NOP5:<br/>C6_00530C_A:C6_00560W_A:FCA1:C6_00640C_A:CDC14:TOP1:HAL22:C6_01040C_<br/>A:C6_01120C_A:CIC1:PMP1:TIF3:RAD18:HCH1:C6_01890C_A:C6_01980C_A:SWD3:<br/>C6_02230W_A:RPL10A:ALG11:C6_02280W_A:C6_02290C_A:C6_02300C_A:C6_023<br/>50C_A:C6_02370C_A:C6_02430W_A:PRP45:C6_02690C_A:MRT4:C6_02900C_A:PO<br/>P4:C6_03210C_A:BMT4:C6_03320W_A:C6_03380W_A:C6_03390W_A:C6_03440W<br/>_A:NAM2:SPB1:C6_04240W_A:NOP8:ILS1:C6_04530C_A:C7_00160C_A:C7_00220W<br/>_A:C7_00330C_A:THG1:RPA135:NOP15:YML6:C7_01020C_A:C7_01030C_A:DBP7:C<br/>7_01210C_A:ASC1:C7_01270C_A:C7_01360C_A:C7_01400C_A:GIR2:PRT1:FLU1:C7_<br/>01570C_A:C7_01600W_A:C7_01950W_A:LIG1:C7_02340C_A:C7_02460C_A:C7_026<br/>60C_A:C7_02930C_A:IFM1:C7_03400C_A:ISY1:ENP2:ARG4:C7_03590C_A:ENP1:HIS<br/>7:MRP7:C7_03850W_A:C7_03880C_A:C7_04150W_A:UTP18:MIS12:CR_00430C_A:<br/>CR_00460C_A:MRPL6:ADE1:BUD22:PWP2:CR_00830W_A:TRM1:DAL81:CR_01260<br/>W_A:CR_01320C_A:CR_01410C_A:PRS:CR_01550C_A:TRP2:CR_01600C_A:MET6:CR</p> |
|--|--|--|--|--|--|--------------------------------------------------------------------------------------------------------------------------------------------------------------------------------------------------------------------------------------------------------------------------------------------------------------------------------------------------------------------------------------------------------------------------------------------------------------------------------------------------------------------------------------------------------------------------------------------------------------------------------------------------------------------------------------------------------------------------------------------------------------------------------------------------------------------------------------------------------------------------------------------------------------------------------------------------------------------------------------------------------------------------------------------------------------------------------------------------------------------------------------------------------------------------------------------------------------------------------------------------------------------------------------------------------------------------------------------------------------------------------------------------------------------------------------------------------------------------------------------------------------------------------------------------------------------------------------------------------------------------------------------------------------------------------------------------------------------------------------------------------------------------------------------------------------------------------------------------------------------------------------------------------------------------------------------------------------------------------------------------------------------------------------------------------------------------------------------------------------------------------------------------------------------------------------------------------------------------------------------------------------------------------------------------------------------------------------------------------------------------------------------------------------------------------------------------------------------------------------------------------------------------------------------------------------------------------------------------------------------------------------------------------------------------------------------------------------------------------------------------------------------------------------------------------------------------|

|  |  |  |  |  |  |                                                                                                                                                                                                                                                                                                                                                                                                                                                                                                                                                                                                                                                                                                                                                                                                                                                                                                                                                                      |
|--|--|--|--|--|--|----------------------------------------------------------------------------------------------------------------------------------------------------------------------------------------------------------------------------------------------------------------------------------------------------------------------------------------------------------------------------------------------------------------------------------------------------------------------------------------------------------------------------------------------------------------------------------------------------------------------------------------------------------------------------------------------------------------------------------------------------------------------------------------------------------------------------------------------------------------------------------------------------------------------------------------------------------------------|
|  |  |  |  |  |  | <p>_01670W_A: CDC60: CR_01700C_A: CR_01710W_A: CR_01780W_A: CR_01950W_A: CR_02030C_A: MCM6: MET2: ERG25: CR_02420W_A: CR_02430C_A: CHO2: CR_02550C_A: PAN6: RRP9: RPC31: CR_02890C_A: SRP40: ARC1: SMC5: CR_03110W_A: CR_03200C_A: CR_03230W_A: CR_03360W_A: KT112: MTG1: CR_03400W_A: NCS2: YVH1: SMC1: PRP42: CR_03940W_A: MEX67: CR_04110W_A: CR_04160C_A: CR_04170W_A: QDR1: CR_04240C_A: CR_04300W_A: CR_04500C_A: CR_04710W_A: ADE6: RPB8: CR_04920W_A: NOC2: CR_05550C_A: RNR3: MTG2: DBP8: RFX1: RPL7: CR_06230W_A: FGR50: CR_06450W_A: RRN11: HSP60: CR_06680C_A: NMD3: CR_06840W_A: CR_06970C_A: CR_06980W_A: POL2: MIS11: CR_07030C_A: URA2: CR_07310W_A: PIF1: FUN30: CR_07640C_A: ARO2: CDC45: DBP6: IMP4: CR_08000C_A: NOP10: SSB1: RIO2: ATS1: CR_08330W_A: CYS3: RPP2A: GSH2: CR_08410W_A: TSR1: CR_08940W_A: MPS1: ELF1: SSF1: CR_09740W_A: MED21: CR_09800C_A: DPB2: SIK1: UTP5: CR_10260W_A: CR_10410C_A: CR_10470C_A: DRS1: PRO1: LTV1: POP3</p> |
|--|--|--|--|--|--|----------------------------------------------------------------------------------------------------------------------------------------------------------------------------------------------------------------------------------------------------------------------------------------------------------------------------------------------------------------------------------------------------------------------------------------------------------------------------------------------------------------------------------------------------------------------------------------------------------------------------------------------------------------------------------------------------------------------------------------------------------------------------------------------------------------------------------------------------------------------------------------------------------------------------------------------------------------------|

|       |                                        |                              |                                          |          |       |                                                                                                                                                                                                                                                                                                                                                                                                                                                                                                                                                                                                                                                                                                                                                                                                                                                                                                                                                                                                                                                                                                                                                                                                                                                                                                                                                                                                                                                                                                                                                                                                                                                                                                                                                                                                                                                                                                                                                                                                                                                                                                                                                                                                                                                                                                                                                                                                                                                                                                                                                                                                                                                                         |
|-------|----------------------------------------|------------------------------|------------------------------------------|----------|-------|-------------------------------------------------------------------------------------------------------------------------------------------------------------------------------------------------------------------------------------------------------------------------------------------------------------------------------------------------------------------------------------------------------------------------------------------------------------------------------------------------------------------------------------------------------------------------------------------------------------------------------------------------------------------------------------------------------------------------------------------------------------------------------------------------------------------------------------------------------------------------------------------------------------------------------------------------------------------------------------------------------------------------------------------------------------------------------------------------------------------------------------------------------------------------------------------------------------------------------------------------------------------------------------------------------------------------------------------------------------------------------------------------------------------------------------------------------------------------------------------------------------------------------------------------------------------------------------------------------------------------------------------------------------------------------------------------------------------------------------------------------------------------------------------------------------------------------------------------------------------------------------------------------------------------------------------------------------------------------------------------------------------------------------------------------------------------------------------------------------------------------------------------------------------------------------------------------------------------------------------------------------------------------------------------------------------------------------------------------------------------------------------------------------------------------------------------------------------------------------------------------------------------------------------------------------------------------------------------------------------------------------------------------------------------|
| 2E+06 | organic substance biosynthetic process | 699 out of 1061 genes, 65.9% | 2571 out of 6473 background genes, 39.7% | 3.62E-76 | 0.00% | RIM8:LEU4:HBR1:C1_00510W_A:CNS1:RPO41:SPE1:NRM1:RRS1:TRI1:HMT1:C1_01150C_A:C1_01160C_A:TRM2:ABC1:C1_01530C_A:CYS4:C1_02090C_A:ABP140:CWH8:C1_02380C_A:C1_02450C_A:SNZ1:SNO1:HOM6:LYS2:PDE2:MIA40:C1_02900C_A:C1_02970W_A:TSR2:C1_03370W_A:C1_03540C_A:C1_03630W_A:C1_03790C_A:RPP1:C1_03830C_A:KTR4:C1_04040C_A:C1_04120C_A:ERB1:NOP4:C1_04510W_A:C1_04530C_A:C1_04710C_A:MRPL37:C1_04970W_A:RHD1:ARG2:RRP6:REI1:TRY2:ARO4:C1_05220C_A:C1_05270C_A:C1_05360C_A:C1_05380C_A:RSM22:RPS27A:C1_05630C_A:FAL1:C1_05650W_A:RAD10:C1_05990C_A:BUD16:C1_06530C_A:C1_06540C_A:NOP6:C1_06760C_A:RIA1:YMC1:C1_07340W_A:C1_07470C_A:LHP1:C1_07510W_A:C1_07660W_A:ADE4:GCS1:ADE5,7:MRPL3:ERD1:C1_07950C_A:C1_07960W_A:FUN12:DRG1:CAT8:MLT1:DIP2:SAM4:GCR3:UPC2:C1_08520C_A:GCD6:C1_08630W_A:MSS116:C1_08890C_A:CEF1:C1_09390W_A:GUA1:C1_09610W_A:C1_09710C_A:C1_09790C_A:BUD31:C1_09910C_A:PDC2:DBP3:MNN23:C1_10080W_A:C1_10200C_A:C1_10340W_A:FCY23:C1_10620W_A:RPA190:C1_10690W_A:C1_10920W_A:C1_10950C_A:C1_10970W_A:C1_11000C_A:PET127:FGR39:NEP1:KRR1:SAM2:C1_11610C_A:C1_11790W_A:MUP1:C1_11880W_A:C1_11900C_A:C1_11910W_A:SER33:TRP3:C1_12280C_A:CSI2:MRPS9:C1_12350W_A:WRS1:C1_12440W_A:C1_12570C_A:C1_12630C_A:C1_12670C_A:C1_12750C_A:C1_12760W_A:FEN1:C1_12820C_A:RPL14:C1_13060C_A:REX3:C1_13330C_A:RMP1:C1_13380W_A:MCU1:C1_13820C_A:C1_14080W_A:C1_14330W_A:MPP10:FAV3:C2_00200W_A:C2_00280C_A:C2_00390C_A:C2_00410C_A:C2_00820W_A:C2_00840W_A:MXR1:C2_01070W_A:C2_01220W_A:C2_01420C_A:APT1:REX2:C2_01740C_A:C2_01820C_A:PRP39:C2_01860C_A:C2_01870C_A:ARO3:C2_02120W_A:C2_02270C_A:C2_02420C_A:UTP21:UTP22:PRS1:C2_02540W_A:C2_02630W_A:PDR17:SER2:C2_02930C_A:MET1:BNA31:SMP3:PRP3:C2_03560C_A:MNN42:GPI13:SCH9:C2_03950W_A:C2_04120C_A:TBF1:BAT21:SU V3:RIM2:C2_04570W_A:SNU114:C2_04700C_A:C2_04820W_A:PZF1:CKA2:C2_05050C_A:C2_05080C_A:MAK5:C2_05160C_A:CDC21:RPF2:C2_05270W_A:RPC40:KTI11:C2_05670C_A:C2_05750W_A:C2_05830C_A:C2_05840W_A:IDP1:LAS1:ECM17:ILV1:SER1:MAK16:C2_06480W_A:C2_06520C_A:C2_06530W_A:VAS1:C2_06650C_A:C2_06660W_A:RPL11:FHL1:C2_06850W_A:C2_06950C_A:SPE3:AAH1:NOC4:C2_07360W_A:C2_07410W_A:RCL1:C2_07680W_A:PHO86:PRS5:C2_07920W_A:NSA1:C2_08180C_A:EAF3:RRP8:C2_08530C_A:MSU1:UTP15:MFG1:ASN1:C2_09160W_A:C2_09180W_A:MED18:C2_09310C_A:PES1:TAZ1:RRP15:C2_09500W_A:C2_09660W_A:LEU42:SMM1:C2_09920W_A:CWC22:UBP8:GPD1:PUS7:HEM3:C2_10740C_A:RPC11:C2_10810W_A:RPS24:C3_00100W_A:ULP3:RHR2:UTP8:BUD21:SOF1:C3_00660W_A:C3_00830C_A:BMS1:ARP9:UTP20:NCE103:C3_01310W_A:URA3:MET18:RKI1:RPS7A:C3_01520C_A:C3_01560W_A:C3_02020W_A:C3_02040C_A:UTP4:C3_02180C_A:ILV2:C3_02350W_A:PHA2:C3_02670W_A:C3_02750W_A:C3_02840W_A:C3_02850C_A: |
|-------|----------------------------------------|------------------------------|------------------------------------------|----------|-------|-------------------------------------------------------------------------------------------------------------------------------------------------------------------------------------------------------------------------------------------------------------------------------------------------------------------------------------------------------------------------------------------------------------------------------------------------------------------------------------------------------------------------------------------------------------------------------------------------------------------------------------------------------------------------------------------------------------------------------------------------------------------------------------------------------------------------------------------------------------------------------------------------------------------------------------------------------------------------------------------------------------------------------------------------------------------------------------------------------------------------------------------------------------------------------------------------------------------------------------------------------------------------------------------------------------------------------------------------------------------------------------------------------------------------------------------------------------------------------------------------------------------------------------------------------------------------------------------------------------------------------------------------------------------------------------------------------------------------------------------------------------------------------------------------------------------------------------------------------------------------------------------------------------------------------------------------------------------------------------------------------------------------------------------------------------------------------------------------------------------------------------------------------------------------------------------------------------------------------------------------------------------------------------------------------------------------------------------------------------------------------------------------------------------------------------------------------------------------------------------------------------------------------------------------------------------------------------------------------------------------------------------------------------------------|

|  |  |  |  |  |  |                                                                                                                                                                                                                                                                                                                                                                                                                                                                                                                                                                                                                                                                                                                                                                                                                                                                                                                                                                                                                                                                                                                                                                                                                                                                                                                                                                                                                                                                                                                                                                                                                                                                                                                                                                                                                                                                                                                                                                                                                                                                                                                                                                                                                                                                                                                                                                                                                                                                                                                                                                                                                                                                                                                                                                   |
|--|--|--|--|--|--|-------------------------------------------------------------------------------------------------------------------------------------------------------------------------------------------------------------------------------------------------------------------------------------------------------------------------------------------------------------------------------------------------------------------------------------------------------------------------------------------------------------------------------------------------------------------------------------------------------------------------------------------------------------------------------------------------------------------------------------------------------------------------------------------------------------------------------------------------------------------------------------------------------------------------------------------------------------------------------------------------------------------------------------------------------------------------------------------------------------------------------------------------------------------------------------------------------------------------------------------------------------------------------------------------------------------------------------------------------------------------------------------------------------------------------------------------------------------------------------------------------------------------------------------------------------------------------------------------------------------------------------------------------------------------------------------------------------------------------------------------------------------------------------------------------------------------------------------------------------------------------------------------------------------------------------------------------------------------------------------------------------------------------------------------------------------------------------------------------------------------------------------------------------------------------------------------------------------------------------------------------------------------------------------------------------------------------------------------------------------------------------------------------------------------------------------------------------------------------------------------------------------------------------------------------------------------------------------------------------------------------------------------------------------------------------------------------------------------------------------------------------------|
|  |  |  |  |  |  | A:MET13:C3_03070W_A:C3_03110W_A:C3_03330C_A:YAH1:C3_03560W_A:HBR3:<br>RAD53:C3_04370C_A:C3_04380C_A:ADE2:MAK21:RPS15:RPP2B:ARV1:SFP1:NOP14:<br>CEM1:C3_05140C_A:C3_05160C_A:RPL8B:C3_05280C_A:C3_05380W_A:GPI1:C3_0<br>5440C_A:QDR2:C3_05800W_A:C3_05860C_A:TRM12:C3_05900W_A:CTA4:NOG1:C<br>3_06150W_A:C3_06240C_A:DOT1:ISW2:C3_06370C_A:NSA2:OPI3:PRP5:C3_06830C<br>_A:RPS12:NOP13:C3_07400W_A:C3_07550C_A:C3_07570C_A:RIT1:RAD4:UTP9:C3_<br>07800C_A:HIS4:MET15:DUR4:RLP24:NMD5:HIS5:C4_00690C_A:C4_00740W_A:C4_<br>00800W_A:C4_00810C_A:C4_00880W_A:ARO1:C4_00940W_A:PTC8:RAT1:C4_0128<br>0C_A:PGA53:ILV6:PWP1:NIP1:C4_01500W_A:TOA2:HSX11:TIM10:ZCF25:C4_02400C<br>_A:SLX4:HIT1:SAS10:RPC53:HCA4:C4_02850W_A:ZUO1:C4_02880C_A:NAN1:C4_03<br>140C_A:C4_03170W_A:DAO2:C4_03410W_A:RAD2:C4_03720C_A:C4_03730C_A:C4_<br>03740W_A:NUP84:C4_03830W_A:RRP42:RAM1:ECM1:C4_04130W_A:DUO1:C4_0<br>4390W_A:C4_04520W_A:SSZ1:BAS1:C4_04810C_A:AGP3:RPL30:C4_05230C_A:C4_<br>05260W_A:C4_05360C_A:OFD1:HOM3:C4_05650W_A:TRP5:C4_06210C_A:C4_064<br>10W_A:NOP1:C4_06790W_A:C4_06950W_A:MET16:C4_07060W_A:TRP4:C4_0714<br>0W_A:C4_07150W_A:C5_00030W_A:C5_00260W_A:C5_00280C_A:DUS4:C5_00320<br>W_A:MRP17:MET14:RMT2:SPE2:C5_00820W_A:C5_00920W_A:BUD23:CYC3:C5_01<br>140C_A:PUS4:C5_01430C_A:FYV5:SPB4:C5_01610W_A:CCN1:C5_01700W_A:C5_01<br>930W_A:C5_02010C_A:C5_02070C_A:RIX7:THR4:C5_02440C_A:TIF5:SPR28:UTP13:<br>C5_02590C_A:BUR2:CKB2:MSW1:C5_02780W_A:C5_02820C_A:C5_03010W_A:RMS<br>1:CAM1-<br>1:C5_03290C_A:PCL1:RPO26:FUR1:C5_03400C_A:C5_03460C_A:C5_03530C_A:C5_<br>03550W_A:MDJ1:C5_03840W_A:C5_03920C_A:C5_03970W_A:C5_04120C_A:SAH1<br>:C5_04290C_A:C5_04340W_A:URA7:CSU57:MSM1:C5_04720C_A:HYS2:HAS1:C5_04<br>840C_A:C5_04910W_A:GRF10:C5_05250C_A:SDH4:HIS1:C5_05340W_A:ILV3:NOP5:<br>C6_00530C_A:C6_00560W_A:FCA1:C6_00640C_A:CDC14:TOP1:HAL22:C6_01040C_<br>A:C6_01120C_A:CIC1:PMP1:TIF3:RAD18:HCH1:C6_01890C_A:C6_01980C_A:SWD3:<br>C6_02230W_A:RPL10A:ALG11:C6_02280W_A:C6_02290C_A:C6_02300C_A:C6_023<br>50C_A:C6_02370C_A:C6_02430W_A:PRP45:C6_02690C_A:MRT4:C6_02900C_A:PO<br>P4:C6_03210C_A:BMT4:C6_03380W_A:C6_03390W_A:C6_03440W_A:NAM2:SPB1:<br>C6_04240W_A:NOP8:ILS1:C6_04530C_A:C7_00160C_A:C7_00220W_A:C7_00330C_<br>A:THG1:RPA135:NOP15:YML6:C7_01020C_A:C7_01030C_A:DBP7:C7_01210C_A:AS<br>C1:C7_01270C_A:C7_01360C_A:C7_01400C_A:GIR2:PRT1:FLU1:C7_01570C_A:C7_0<br>1600W_A:C7_01950W_A:LIG1:C7_02340C_A:C7_02460C_A:C7_02660C_A:C7_0293<br>0C_A:IFM1:C7_03400C_A:ISY1:ENP2:ARG4:C7_03590C_A:ENP1:HIS7:MRP7:C7_038<br>50W_A:C7_03880C_A:C7_04150W_A:UTP18:MIS12:CR_00430C_A:CR_00460C_A:M<br>RPL6:ADE1:BUD22:PWP2:CR_00830W_A:TRM1:DAL81:CR_01260W_A:CR_01320C_<br>A:CR_01410C_A:PRS:CR_01550C_A:TRP2:CR_01600C_A:MET6:CR_01670W_A:CDC6 |
|--|--|--|--|--|--|-------------------------------------------------------------------------------------------------------------------------------------------------------------------------------------------------------------------------------------------------------------------------------------------------------------------------------------------------------------------------------------------------------------------------------------------------------------------------------------------------------------------------------------------------------------------------------------------------------------------------------------------------------------------------------------------------------------------------------------------------------------------------------------------------------------------------------------------------------------------------------------------------------------------------------------------------------------------------------------------------------------------------------------------------------------------------------------------------------------------------------------------------------------------------------------------------------------------------------------------------------------------------------------------------------------------------------------------------------------------------------------------------------------------------------------------------------------------------------------------------------------------------------------------------------------------------------------------------------------------------------------------------------------------------------------------------------------------------------------------------------------------------------------------------------------------------------------------------------------------------------------------------------------------------------------------------------------------------------------------------------------------------------------------------------------------------------------------------------------------------------------------------------------------------------------------------------------------------------------------------------------------------------------------------------------------------------------------------------------------------------------------------------------------------------------------------------------------------------------------------------------------------------------------------------------------------------------------------------------------------------------------------------------------------------------------------------------------------------------------------------------------|

|  |  |  |  |  |  |                                                                                                                                                                                                                                                                                                                                                                                                                                                                                                                                                                                                                                                                                                                                                                                                                                           |
|--|--|--|--|--|--|-------------------------------------------------------------------------------------------------------------------------------------------------------------------------------------------------------------------------------------------------------------------------------------------------------------------------------------------------------------------------------------------------------------------------------------------------------------------------------------------------------------------------------------------------------------------------------------------------------------------------------------------------------------------------------------------------------------------------------------------------------------------------------------------------------------------------------------------|
|  |  |  |  |  |  | 0:CR_01700C_A:CR_01710W_A:CR_01780W_A:CR_01950W_A:CR_02030C_A:MCM6:MET2:ERG25:CR_02420W_A:CR_02430C_A:CHO2:CR_02550C_A:PAN6:RRP9:RPC31:CR_02890C_A:SRP40:ARC1:SMC5:CR_03110W_A:CR_03200C_A:CR_03230W_A:CR_03360W_A:KTI12:MTG1:CR_03400W_A:NCS2:YVH1:SMC1:PRP42:CR_03940W_A:MEX67:CR_04110W_A:CR_04160C_A:CR_04170W_A:QDR1:CR_04240C_A:CR_0430W_A:CR_04500C_A:CR_04710W_A:ADE6:RPB8:CR_04920W_A:NOC2:CR_05550C_A:RNR3:MTG2:DBP8:RFX1:RPL7:CR_06230W_A:FGR50:CR_06450W_A:RRN11:HSP60:CR_06680C_A:NMD3:CR_06840W_A:CR_06970C_A:CR_06980W_A:POL2:MIS11:CR_07030C_A:URA2:CR_07310W_A:PIF1:FUN30:CR_07640C_A:ARO2:CDC45:DBP6:IMP4:CR_08000C_A:NOP10:SSB1:RIO2:ATS1:CR_08330W_A:CYS3:RPP2A:GSH2:CR_08410W_A:TSR1:CR_08940W_A:MPS1:ELF1:SSF1:CR_09740W_A:MED21:CR_09800C_A:DPB2:SIK1:UTP5:CR_10260W_A:CR_10410C_A:CR_10470C_A:DRS1:PRO1:LTV1:POP3 |
|--|--|--|--|--|--|-------------------------------------------------------------------------------------------------------------------------------------------------------------------------------------------------------------------------------------------------------------------------------------------------------------------------------------------------------------------------------------------------------------------------------------------------------------------------------------------------------------------------------------------------------------------------------------------------------------------------------------------------------------------------------------------------------------------------------------------------------------------------------------------------------------------------------------------|



|      |                                    |                              |                                          |          |       |                                                                                                                                                                                                                                                                                                                                                                                                                                                                                                                                                                                                                                                                                                                                                                                                                                                                                                                                                                                                                                                                                                                                                                                                                                                                                                                                                                                                                                                                                                                                                                                                                                                                                                                                                                                                                                                                                                                                                                                                                                                                                                                                                                                                                                                                                                                                                                                                                                                                                                                                                                                                                                                                       |
|------|------------------------------------|------------------------------|------------------------------------------|----------|-------|-----------------------------------------------------------------------------------------------------------------------------------------------------------------------------------------------------------------------------------------------------------------------------------------------------------------------------------------------------------------------------------------------------------------------------------------------------------------------------------------------------------------------------------------------------------------------------------------------------------------------------------------------------------------------------------------------------------------------------------------------------------------------------------------------------------------------------------------------------------------------------------------------------------------------------------------------------------------------------------------------------------------------------------------------------------------------------------------------------------------------------------------------------------------------------------------------------------------------------------------------------------------------------------------------------------------------------------------------------------------------------------------------------------------------------------------------------------------------------------------------------------------------------------------------------------------------------------------------------------------------------------------------------------------------------------------------------------------------------------------------------------------------------------------------------------------------------------------------------------------------------------------------------------------------------------------------------------------------------------------------------------------------------------------------------------------------------------------------------------------------------------------------------------------------------------------------------------------------------------------------------------------------------------------------------------------------------------------------------------------------------------------------------------------------------------------------------------------------------------------------------------------------------------------------------------------------------------------------------------------------------------------------------------------------|
| 9059 | macromolecule biosynthetic process | 619 out of 1061 genes, 58.3% | 2190 out of 6473 background genes, 33.8% | 5.33E-69 | 0.00% | RIM8:HBR1:CNS1:RPO41:NRM1:RRS1:TRI1:HMT1:C1_01150C_A:C1_01160C_A:TRM2:C1_01530C_A:C1_02090C_A:ABP140:CWH8:C1_02380C_A:C1_02450C_A:HOM6:PDE2:MIA40:C1_02900C_A:TSR2:C1_03370W_A:C1_03540C_A:C1_03630W_A:C1_03790C_A:RPP1:C1_03830C_A:KTR4:C1_04040C_A:C1_04120C_A:ERB1:NOP4:C1_04510W_A:C1_04530C_A:C1_04710C_A:MRPL37:C1_04970W_A:RRP6:REI1:TRY2:C1_05220C_A:C1_05270C_A:C1_05360C_A:C1_05380C_A:RSM22:RPS27A:C1_05630C_A:FAL1:C1_05650W_A:RAD10:C1_06530C_A:C1_06540C_A:NOP6:C1_06760C_A:RI A1:C1_07340W_A:C1_07470C_A:LHP1:C1_07510W_A:C1_07660W_A:MRPL3:ERD1:C1_07950C_A:C1_07960W_A:FUN12:DRG1:CAT8:MLT1:DIP2:GCR3:C1_08520C_A:G CD6:C1_08630W_A:MSS116:C1_08890C_A:CEF1:C1_09390W_A:C1_09710C_A:C1_09790C_A:BUD31:C1_09910C_A:PDC2:DBP3:MNN23:C1_10080W_A:C1_10200C_A:C1_10340W_A:FCY23:C1_10620W_A:RPA190:C1_10690W_A:C1_10920W_A:C1_10950C_A:C1_10970W_A:C1_11000C_A:PET127:FGR39:NEP1:KRR1:SAM2:MUP1:C1_11880W_A:C1_11900C_A:C1_11910W_A:SER33:TRP3:C1_12280C_A:CSI2:MRPS9:C1_12350W_A:WRS1:C1_12440W_A:C1_12570C_A:C1_12630C_A:C1_12670C_A:C1_12750C_A:C1_12760W_A:FEN1:C1_12820C_A:RPL14:C1_13060C_A:REX3:RMP1:C1_13380W_A:MCU1:C1_13820C_A:C1_14080W_A:C1_14330W_A:MPP10:FAV3:C2_00200W_A:C2_00280C_A:C2_00410C_A:C2_00820W_A:C2_00840W_A:C2_01070W_A:C2_01220W_A:C2_01420C_A:REX2:C2_01740C_A:C2_01820C_A:PRP39:C2_01860C_A:C2_01870C_A:C2_02120W_A:C2_02270C_A:C2_02420C_A:UTP21:UTP22:PR S1:C2_02540W_A:C2_02630W_A:PDR17:C2_02930C_A:MET1:SMP3:PRP3:C2_03560C_A:MNN42:GPI13:SCH9:C2_03950W_A:C2_04120C_A:TBF1:SUV3:RIM2:C2_04570W_A:SNU114:C2_04700C_A:C2_04820W_A:PZF1:CKA2:C2_05050C_A:C2_05080C_A:MAK5:C2_05160C_A:RPF2:C2_05270W_A:RPC40:KTI11:C2_05670C_A:C2_05750W_A:C2_05830C_A:C2_05840W_A:IDP1:LAS1:ECM17:SER1:MAK16:C2_06480W_A:C2_06520C_A:C2_06530W_A:VAS1:C2_06650C_A:C2_06660W_A:RPL11:FHL1:C2_06850W_A:C2_06950C_A:SPE3:NOC4:C2_07360W_A:RCL1:C2_07680W_A:PHO86:PR S5:C2_07920W_A:NSA1:C2_08180C_A:EAF3:RRP8:C2_08530C_A:MSU1:UTP15:MFG 1:C2_09160W_A:C2_09180W_A:MED18:C2_09310C_A:PES1:TAZ1:RRP15:C2_09500W_A:C2_09660W_A:SMM1:C2_09920W_A:CWC22:UBP8:PUS7:HEM3:C2_10740C_A:RPC11:C2_10810W_A:RPS24:C3_00100W_A:ULP3:UTP8:BUD21:SOF1:C3_00660W_A:C3_00830C_A:BMS1:ARP9:UTP20:NCE103:C3_01310W_A:MET18:RPS7A:C3_01520C_A:C3_01560W_A:C3_02020W_A:C3_02040C_A:UTP4:C3_02180C_A:ILV2:C3_02350W_A:C3_02670W_A:C3_02750W_A:C3_02840W_A:C3_02850C_A:C3_03070W_A:C3_03110W_A:C3_03330C_A:C3_03560W_A:HBR3:C3_04370C_A:C3_04380C_A:MAK21:RPS15:RPP2B:ARV1:SFP1:NOP14:CEM1:C3_05140C_A:C3_05160C_A:RPL 8B:C3_05280C_A:C3_05380W_A:GPI1:C3_05440C_A:QDR2:C3_05800W_A:C3_05860C_A:TRM12:C3_05900W_A:CTA4:NOG1:C3_06150W_A:C3_06240C_A:DOT1:ISW2: |
|------|------------------------------------|------------------------------|------------------------------------------|----------|-------|-----------------------------------------------------------------------------------------------------------------------------------------------------------------------------------------------------------------------------------------------------------------------------------------------------------------------------------------------------------------------------------------------------------------------------------------------------------------------------------------------------------------------------------------------------------------------------------------------------------------------------------------------------------------------------------------------------------------------------------------------------------------------------------------------------------------------------------------------------------------------------------------------------------------------------------------------------------------------------------------------------------------------------------------------------------------------------------------------------------------------------------------------------------------------------------------------------------------------------------------------------------------------------------------------------------------------------------------------------------------------------------------------------------------------------------------------------------------------------------------------------------------------------------------------------------------------------------------------------------------------------------------------------------------------------------------------------------------------------------------------------------------------------------------------------------------------------------------------------------------------------------------------------------------------------------------------------------------------------------------------------------------------------------------------------------------------------------------------------------------------------------------------------------------------------------------------------------------------------------------------------------------------------------------------------------------------------------------------------------------------------------------------------------------------------------------------------------------------------------------------------------------------------------------------------------------------------------------------------------------------------------------------------------------------|

|  |  |  |  |  |  |                                                                                                                                                                                                                                                                                                                                                                                                                                                                                                                                                                                                                                                                                                                                                                                                                                                                                                                                                                                                                                                                                                                                                                                                                                                                                                                                                                                                                                                                                                                                                                                                                                                                                                                                                                                                                                                                                                                                                                                                                                                                                                                                                                                                                                                                                                                                                                                                                                                                                                                                                                                                                                              |
|--|--|--|--|--|--|----------------------------------------------------------------------------------------------------------------------------------------------------------------------------------------------------------------------------------------------------------------------------------------------------------------------------------------------------------------------------------------------------------------------------------------------------------------------------------------------------------------------------------------------------------------------------------------------------------------------------------------------------------------------------------------------------------------------------------------------------------------------------------------------------------------------------------------------------------------------------------------------------------------------------------------------------------------------------------------------------------------------------------------------------------------------------------------------------------------------------------------------------------------------------------------------------------------------------------------------------------------------------------------------------------------------------------------------------------------------------------------------------------------------------------------------------------------------------------------------------------------------------------------------------------------------------------------------------------------------------------------------------------------------------------------------------------------------------------------------------------------------------------------------------------------------------------------------------------------------------------------------------------------------------------------------------------------------------------------------------------------------------------------------------------------------------------------------------------------------------------------------------------------------------------------------------------------------------------------------------------------------------------------------------------------------------------------------------------------------------------------------------------------------------------------------------------------------------------------------------------------------------------------------------------------------------------------------------------------------------------------------|
|  |  |  |  |  |  | C3_06370C_A:NSA2:PRP5:C3_06830C_A:RPS12:NOP13:C3_07400W_A:C3_07550C_A:C3_07570C_A:RIT1:RAD4:UTP9:C3_07800C_A:DUR4:RLP24:NMD5:HIS5:C4_00690C_A:C4_00740W_A:C4_00800W_A:C4_00810C_A:C4_00880W_A:ARO1:C4_00940W_A:PTC8:RAT1:C4_01280C_A:PGA53:PWP1:NIP1:C4_01500W_A:TOA2:HSX11:TIM10:ZCF25:C4_02400C_A:SLX4:HIT1:SAS10:RPC53:HCA4:C4_02850W_A:ZUO1:C4_02880C_A:NAN1:C4_03140C_A:C4_03170W_A:DAO2:C4_03410W_A:RAD2:C4_03720C_A:C4_03730C_A:C4_03740W_A:NUP84:C4_03830W_A:RRP42:RAM1:ECM1:C4_04130W_A:DUO1:C4_04390W_A:C4_04520W_A:SSZ1:BAS1:C4_04810C_A:AGP3:RPL30:C4_05230C_A:C4_05260W_A:C4_05360C_A:OFD1:C4_05650W_A:C4_06210C_A:C4_06410W_A:NOP1:C4_06790W_A:C4_06950W_A:C4_07060W_A:C4_07140W_A:C4_07150W_A:C5_00030W_A:C5_00280C_A:DUS4:C5_00320W_A:MRP17:MET14:RMT2:C5_00820W_A:C5_00920W_A:BUD23:CYC3:C5_01140C_A:PUS4:C5_01430C_A:FYV5:SPB4:C5_01610W_A:CCN1:C5_01700W_A:C5_01930W_A:C5_02010C_A:C5_02070C_A:RIX7:C5_02440C_A:TIF5:SPR28:UTP13:C5_02590C_A:BUR2:CKB2:MSW1:C5_02780W_A:C5_02820C_A:C5_03010W_A:RMS1:CAM1-1:C5_03290C_A:PCL1:RPO26:FUR1:C5_03400C_A:C5_03460C_A:C5_03530C_A:C5_03550W_A:MDJ1:C5_03920C_A:C5_03970W_A:C5_04120C_A:C5_04290C_A:C5_04340W_A:CSU57:MSM1:HYS2:HAS1:C5_04840C_A:C5_04910W_A:GRF10:C5_05250C_A:SDH4:C5_05340W_A:NOP5:C6_00530C_A:C6_00560W_A:C6_00640C_A:CDC14:TOP1:C6_01040C_A:C6_01120C_A:CIC1:PMP1:TIF3:RAD18:HCH1:C6_01890C_A:C6_01980C_A:SWD3:C6_02230W_A:RPL10A:ALG11:C6_02280W_A:C6_02290C_A:C6_02300C_A:C6_02350C_A:C6_02370C_A:C6_02430W_A:PRP45:C6_02690C_A:MRT4:C6_02900C_A:POP4:C6_03210C_A:C6_03380W_A:C6_03390W_A:C6_03440W_A:NAME2:SPB1:C6_04240W_A:NOP8:ILS1:C6_04530C_A:C7_00160C_A:C7_00220W_A:C7_00330C_A:THG1:RPA135:NOP15:YML6:C7_01020C_A:C7_01030C_A:DBP7:C7_01210C_A:ASC1:C7_01270C_A:C7_01360C_A:C7_01400C_A:GIR2:PRT1:FLU1:C7_01570C_A:C7_01600W_A:C7_01950W_A:LIG1:C7_02340C_A:C7_02460C_A:C7_02660C_A:C7_02930C_A:IFM1:C7_03400C_A:ISY1:ENP2:C7_03590C_A:ENP1:HIS7:MRP7:C7_03850W_A:C7_03880C_A:C7_04150W_A:UTP18:CR_00430C_A:CR_00460C_A:MRPL6:ADE1:BUD22:PWP2:CR_00830W_A:TRM1:DAL81:CR_01260W_A:CR_01320C_A:CR_01410C_A:PRS:CR_01550C_A:CR_01600C_A:CR_01670W_A:CDC60:CR_01700C_A:CR_01710W_A:CR_01780W_A:CR_01950W_A:CR_02030C_A:MCM6:ERG25:CR_02420W_A:CR_02430C_A:CR_02550C_A:RRP9:RPC31:CR_02890C_A:SRP40:ARC1:SMC5:CR_03110W_A:CR_03200C_A:CR_03230W_A:CR_03360W_A:KTI12:MTG1:CR_03400W_A:NCS2:YVH1:SMC1:PRP42:CR_03940W_A:MEX67:CR_04110W_A:CR_04160C_A:CR_04170W_A:CR_04240C_A:CR_04300W_A:CR_04500C_A:CR_04710W_A:RPB8:CR_04920W_A:NOC2:CR_05550C_A:RNR3:MTG2:DBP8:RFX1:RPL7:CR_06230W_A:FGR50:CR_06450W_A:RRN11:HSP60:CR_06680C_A:NMD3:CR_06840W_A:CR_06 |
|--|--|--|--|--|--|----------------------------------------------------------------------------------------------------------------------------------------------------------------------------------------------------------------------------------------------------------------------------------------------------------------------------------------------------------------------------------------------------------------------------------------------------------------------------------------------------------------------------------------------------------------------------------------------------------------------------------------------------------------------------------------------------------------------------------------------------------------------------------------------------------------------------------------------------------------------------------------------------------------------------------------------------------------------------------------------------------------------------------------------------------------------------------------------------------------------------------------------------------------------------------------------------------------------------------------------------------------------------------------------------------------------------------------------------------------------------------------------------------------------------------------------------------------------------------------------------------------------------------------------------------------------------------------------------------------------------------------------------------------------------------------------------------------------------------------------------------------------------------------------------------------------------------------------------------------------------------------------------------------------------------------------------------------------------------------------------------------------------------------------------------------------------------------------------------------------------------------------------------------------------------------------------------------------------------------------------------------------------------------------------------------------------------------------------------------------------------------------------------------------------------------------------------------------------------------------------------------------------------------------------------------------------------------------------------------------------------------------|

|  |  |  |  |  |  |                                                                                                                                                                                                                                                                                                 |
|--|--|--|--|--|--|-------------------------------------------------------------------------------------------------------------------------------------------------------------------------------------------------------------------------------------------------------------------------------------------------|
|  |  |  |  |  |  | 970C_A:CR_06980W_A:POL2:CR_07030C_A:URA2:CR_07310W_A:PIF1:FUN30:CR_07640C_A:CDC45:DBP6:IMP4:CR_08000C_A:NOP10:SSB1:RIO2:ATS1:CR_08330W_A:RPP2A:GSH2:CR_08410W_A:TSR1:CR_08940W_A:MPS1:ELF1:SSF1:CR_09740W_A:MED21:CR_09800C_A:DPB2:SIK1:UTP5:CR_10260W_A:CR_10410C_A:CR_10470C_A:DRS1:LTV1:POP3 |
|--|--|--|--|--|--|-------------------------------------------------------------------------------------------------------------------------------------------------------------------------------------------------------------------------------------------------------------------------------------------------|

|     |                                   |                                       |                                                     |          |       |                                                                                                                                                                                                                                                                                                                                                                                                                                                                                                                                                                                                                                                                                                                                                                                                                                                                                                                                                                                                                                                                                                                                                                                                                                                                                                                                                                                                                                                                                                                                                                                                                                                                                                                                                                                                                                                                                                                                                                                                                                                                                                                                                                                     |
|-----|-----------------------------------|---------------------------------------|-----------------------------------------------------|----------|-------|-------------------------------------------------------------------------------------------------------------------------------------------------------------------------------------------------------------------------------------------------------------------------------------------------------------------------------------------------------------------------------------------------------------------------------------------------------------------------------------------------------------------------------------------------------------------------------------------------------------------------------------------------------------------------------------------------------------------------------------------------------------------------------------------------------------------------------------------------------------------------------------------------------------------------------------------------------------------------------------------------------------------------------------------------------------------------------------------------------------------------------------------------------------------------------------------------------------------------------------------------------------------------------------------------------------------------------------------------------------------------------------------------------------------------------------------------------------------------------------------------------------------------------------------------------------------------------------------------------------------------------------------------------------------------------------------------------------------------------------------------------------------------------------------------------------------------------------------------------------------------------------------------------------------------------------------------------------------------------------------------------------------------------------------------------------------------------------------------------------------------------------------------------------------------------------|
| 470 | maturati<br>on of<br>LSU-<br>rRNA | 212 out of<br>1061<br>genes,<br>20.0% | 431 out of<br>6473<br>backgroun<br>d genes,<br>6.7% | 4.60E-58 | 0.00% | TRI1:C1_02090C_A:C1_02450C_A:PDE2:C1_02900C_A:RPP1:C1_03830C_A:C1_0412<br>0C_A:NOP4:C1_04510W_A:C1_04710C_A:C1_04970W_A:REI1:TRY2:C1_05220C_A:<br>C1_05650W_A:C1_06540C_A:NOP6:RIA1:C1_07510W_A:C1_07660W_A:ERD1:C1_0<br>7960W_A:GCR3:C1_08630W_A:CEF1:C1_09390W_A:PDC2:DBP3:FCY23:C1_11000C<br>_A:MUP1:C1_11900C_A:C1_11910W_A:TRP3:C1_12280C_A:CSI2:C1_12350W_A:C1<br>_12440W_A:C1_12570C_A:C1_12630C_A:C1_12750C_A:C1_12760W_A:C1_12820C<br>_A:RMP1:C1_13380W_A:MCU1:C2_00280C_A:C2_00820W_A:C2_01220W_A:C2_0<br>1820C_A:C2_01860C_A:C2_02120W_A:C2_02540W_A:C2_02630W_A:PRP3:SCH9:C<br>2_04120C_A:SUV3:SNU114:C2_04700C_A:PZF1:CKA2:C2_05050C_A:MAK5:RPF2:C2<br>_05750W_A:C2_05830C_A:LAS1:ECM17:MAK16:C2_06520C_A:C2_06530W_A:C2_0<br>6660W_A:C2_06850W_A:EAF3:RRP8:C2_08530C_A:MSU1:UTP15:C2_09160W_A:C2<br>_09180W_A:RRP15:SMM1:C2_09920W_A:CWC22:C2_10740C_A:C3_00660W_A:C3<br>_00830C_A:ARP9:NCE103:C3_01310W_A:C3_01560W_A:ILV2:C3_02670W_A:C3_0<br>2840W_A:C3_02850C_A:C3_03330C_A:C3_04370C_A:ARV1:NOP14:CEM1:C3_0516<br>0C_A:RPL8B:C3_05280C_A:C3_05380W_A:C3_05440C_A:QDR2:C3_05800W_A:C3_<br>05860C_A:C3_05900W_A:NSA2:PRP5:C3_07550C_A:C3_07570C_A:DUR4:NMD5:C4<br>_00740W_A:RAT1:C4_01280C_A:SLX4:HIT1:C4_02880C_A:DAO2:C4_03720C_A:NU<br>P84:C4_03830W_A:RAM1:AGP3:C4_05260W_A:C4_05360C_A:C4_06210C_A:C4_06<br>410W_A:C4_06790W_A:C4_06950W_A:C4_07060W_A:RMT2:C5_00920W_A:C5_01<br>430C_A:SPB4:C5_01930W_A:C5_02010C_A:C5_02440C_A:SPR28:CKB2:C5_03010W<br>_A:RMS1:C5_03920C_A:C5_04120C_A:HAS1:C5_04910W_A:GRF10:C6_01120C_A:C<br>IC1:C6_01890C_A:SWD3:C6_02230W_A:ALG11:C6_02430W_A:C6_03210C_A:C6_0<br>3390W_A:C6_03440W_A:SPB1:C6_04240W_A:NOP8:NOP15:DBP7:C7_01360C_A:GI<br>R2:FLU1:C7_01570C_A:LIG1:C7_02460C_A:C7_02660C_A:C7_02930C_A:C7_03400C<br>_A:ISY1:C7_03590C_A:ENP1:C7_03850W_A:C7_03880C_A:C7_04150W_A:CR_0083<br>0W_A:DAL81:CR_01320C_A:CR_01550C_A:CR_01600C_A:CR_01670W_A:CR_01700<br>C_A:CR_02030C_A:CR_02890C_A:CR_03200C_A:CR_03360W_A:PRP42:CR_03940W<br>_A:CR_04170W_A:CR_04500C_A:CR_04710W_A:CR_05550C_A:RNR3:RPL7:CR_062<br>30W_A:CR_06450W_A:RRN11:CR_06970C_A:CR_07640C_A:DBP6:CR_08000C_A:SS<br>F1:CR_09740W_A:MED21:CR_10260W_A |
|-----|-----------------------------------|---------------------------------------|-----------------------------------------------------|----------|-------|-------------------------------------------------------------------------------------------------------------------------------------------------------------------------------------------------------------------------------------------------------------------------------------------------------------------------------------------------------------------------------------------------------------------------------------------------------------------------------------------------------------------------------------------------------------------------------------------------------------------------------------------------------------------------------------------------------------------------------------------------------------------------------------------------------------------------------------------------------------------------------------------------------------------------------------------------------------------------------------------------------------------------------------------------------------------------------------------------------------------------------------------------------------------------------------------------------------------------------------------------------------------------------------------------------------------------------------------------------------------------------------------------------------------------------------------------------------------------------------------------------------------------------------------------------------------------------------------------------------------------------------------------------------------------------------------------------------------------------------------------------------------------------------------------------------------------------------------------------------------------------------------------------------------------------------------------------------------------------------------------------------------------------------------------------------------------------------------------------------------------------------------------------------------------------------|

|     |                                                                                                                                       |                                       |                                                     |          |       |                                                                                                                                                                                                                                                                                                                                                                                                                                                                                                                                                                                                                                                                                                                                                                                                                                                                                                                                                                                                                                                                                                                                                                                                                                                                                                                                                                                                                                                                                                                                                                                                                                                                                                                                                                                                                                                                                                                                                                                                                                                           |
|-----|---------------------------------------------------------------------------------------------------------------------------------------|---------------------------------------|-----------------------------------------------------|----------|-------|-----------------------------------------------------------------------------------------------------------------------------------------------------------------------------------------------------------------------------------------------------------------------------------------------------------------------------------------------------------------------------------------------------------------------------------------------------------------------------------------------------------------------------------------------------------------------------------------------------------------------------------------------------------------------------------------------------------------------------------------------------------------------------------------------------------------------------------------------------------------------------------------------------------------------------------------------------------------------------------------------------------------------------------------------------------------------------------------------------------------------------------------------------------------------------------------------------------------------------------------------------------------------------------------------------------------------------------------------------------------------------------------------------------------------------------------------------------------------------------------------------------------------------------------------------------------------------------------------------------------------------------------------------------------------------------------------------------------------------------------------------------------------------------------------------------------------------------------------------------------------------------------------------------------------------------------------------------------------------------------------------------------------------------------------------------|
| 463 | maturati<br>on of<br>LSU-<br>rRNA<br>from<br>tricistroni<br>c rRNA<br>transcrip<br>t (SSU-<br>rRNA,<br>5.8S<br>rRNA,<br>LSU-<br>rRNA) | 211 out of<br>1061<br>genes,<br>19.9% | 429 out of<br>6473<br>backgroun<br>d genes,<br>6.6% | 9.53E-58 | 0.00% | TRI1:C1_02090C_A:C1_02450C_A:PDE2:C1_02900C_A:RPP1:C1_03830C_A:C1_04120C_A:NOP4:C1_04510W_A:C1_04710C_A:C1_04970W_A:REI1:TRY2:C1_05220C_A:C1_05650W_A:C1_06540C_A:NOP6:RIA1:C1_07510W_A:C1_07660W_A:ERD1:C1_07960W_A:GCR3:C1_08630W_A:CEF1:C1_09390W_A:PDC2:DBP3:FCY23:C1_11000C_A:MUP1:C1_11900C_A:C1_11910W_A:TRP3:C1_12280C_A:CSI2:C1_12350W_A:C1_12440W_A:C1_12570C_A:C1_12630C_A:C1_12750C_A:C1_12760W_A:C1_12820C_A:RMP1:C1_13380W_A:MCU1:C2_00280C_A:C2_00820W_A:C2_01220W_A:C2_01820C_A:C2_01860C_A:C2_02120W_A:C2_02540W_A:C2_02630W_A:PRP3:SCH9:C2_04120C_A:SUV3:SNU114:C2_04700C_A:PZF1:CKA2:C2_05050C_A:MAK5:RPF2:C2_05750W_A:C2_05830C_A:LAS1:ECM17:MAK16:C2_06520C_A:C2_06530W_A:C2_06660W_A:C2_06850W_A:EAF3:RRP8:C2_08530C_A:MSU1:UTP15:C2_09160W_A:C2_09180W_A:RRP15:SMM1:C2_09920W_A:CWC22:C2_10740C_A:C3_00660W_A:C3_00830C_A:ARP9:NCE103:C3_01310W_A:C3_01560W_A:ILV2:C3_02670W_A:C3_02840W_A:C3_02850C_A:C3_03330C_A:C3_04370C_A:ARV1:NOP14:CEM1:C3_05160C_A:C3_05280C_A:C3_05380W_A:C3_05440C_A:QDR2:C3_05800W_A:C3_05860C_A:C3_05900W_A:NSA2:PRP5:C3_07550C_A:C3_07570C_A:DUR4:NMD5:C4_00740W_A:RAT1:C4_01280C_A:SLX4:HIT1:C4_02880C_A:DAO2:C4_03720C_A:NUP84:C4_03830W_A:RAM1:AGP3:C4_05260W_A:C4_05360C_A:C4_06210C_A:C4_06410W_A:C4_06790W_A:C4_06950W_A:C4_07060W_A:RMT2:C5_00920W_A:C5_01430C_A:SPB4:C5_01930W_A:C5_02010C_A:C5_02440C_A:SPR28:CKB2:C5_03010W_A:RMS1:C5_03920C_A:C5_04120C_A:HAS1:C5_04910W_A:GRF10:C6_01120C_A:CIC1:C6_01890C_A:SWD3:C6_02230W_A:ALG11:C6_02430W_A:C6_03210C_A:C6_03390W_A:C6_03440W_A:SPB1:C6_04240W_A:NOP8:NOP15:DBP7:C7_01360C_A:GIR2:FLU1:C7_01570C_A:LIG1:C7_02460C_A:C7_02660C_A:C7_02930C_A:C7_03400C_A:ISY1:C7_03590C_A:ENP1:C7_03850W_A:C7_03880C_A:C7_04150W_A:CR_00830W_A:DAL81:CR_01320C_A:CR_01550C_A:CR_01600C_A:CR_01670W_A:CR_01700C_A:CR_02030C_A:CR_02890C_A:CR_03200C_A:CR_03360W_A:PRP42:CR_03940W_A:CR_04170W_A:CR_04500C_A:CR_04710W_A:CR_05550C_A:RNR3:RPL7:CR_06230W_A:CR_06450W_A:RRN11:CR_06970C_A:CR_07640C_A:DBP6:CR_08000C_A:SSF1:CR_09740W_A:MED21:CR_10260W_A |
|-----|---------------------------------------------------------------------------------------------------------------------------------------|---------------------------------------|-----------------------------------------------------|----------|-------|-----------------------------------------------------------------------------------------------------------------------------------------------------------------------------------------------------------------------------------------------------------------------------------------------------------------------------------------------------------------------------------------------------------------------------------------------------------------------------------------------------------------------------------------------------------------------------------------------------------------------------------------------------------------------------------------------------------------------------------------------------------------------------------------------------------------------------------------------------------------------------------------------------------------------------------------------------------------------------------------------------------------------------------------------------------------------------------------------------------------------------------------------------------------------------------------------------------------------------------------------------------------------------------------------------------------------------------------------------------------------------------------------------------------------------------------------------------------------------------------------------------------------------------------------------------------------------------------------------------------------------------------------------------------------------------------------------------------------------------------------------------------------------------------------------------------------------------------------------------------------------------------------------------------------------------------------------------------------------------------------------------------------------------------------------------|

|     |                                                                                                 |                              |                                        |          |       |                                                                                                                                                                                                                                                                                                                                                                                                                                                                                                                                                                                                                                                                                                                                                                                                                                                                                                                                                                                                                                                                                                                                                                                                                                                                                                                                                                                                                                                                                                                                                                                                                                                                                                                                                                                                                 |
|-----|-------------------------------------------------------------------------------------------------|------------------------------|----------------------------------------|----------|-------|-----------------------------------------------------------------------------------------------------------------------------------------------------------------------------------------------------------------------------------------------------------------------------------------------------------------------------------------------------------------------------------------------------------------------------------------------------------------------------------------------------------------------------------------------------------------------------------------------------------------------------------------------------------------------------------------------------------------------------------------------------------------------------------------------------------------------------------------------------------------------------------------------------------------------------------------------------------------------------------------------------------------------------------------------------------------------------------------------------------------------------------------------------------------------------------------------------------------------------------------------------------------------------------------------------------------------------------------------------------------------------------------------------------------------------------------------------------------------------------------------------------------------------------------------------------------------------------------------------------------------------------------------------------------------------------------------------------------------------------------------------------------------------------------------------------------|
| 480 | endonuclease cleavage in 5'-ETS of tricistronic rRNA transcript (SSU-rRNA, 5.8S rRNA, LSU-rRNA) | 192 out of 1061 genes, 18.1% | 390 out of 6473 background genes, 6.0% | 5.13E-52 | 0.00% | HBR1:CNS1:RPO41:C1_02090C_A:C1_02900C_A:C1_03630W_A:RPP1:C1_03830C_A:C1_04040C_A:C1_04120C_A:NOP4:C1_04510W_A:REI1:TRY2:C1_05360C_A:C1_05380C_A:C1_05650W_A:C1_06540C_A:NOP6:RIA1:C1_07660W_A:C1_07960W_A:MLT1:DIP2:GCD6:C1_08630W_A:CEF1:C1_09390W_A:C1_09710C_A:C1_09790C_A:PCD2:MNN23:FCY23:C1_11000C_A:NEP1:C1_12350W_A:C1_12440W_A:C1_12570C_A:C1_12750C_A:C1_12820C_A:RMP1:C1_13820C_A:C1_14080W_A:MPP10:FAV3:C2_00200W_A:C2_00280C_A:C2_00410C_A:C2_00820W_A:C2_01220W_A:C2_02420C_A:C2_02540W_A:C2_02630W_A:MET1:PRP3:SCH9:C2_04120C_A:TBF1:PZF1:C2_05160C_A:C2_05830C_A:LAS1:C2_06520C_A:C2_06660W_A:FHL1:C2_06850W_A:NOC4:RCL1:PRS5:C2_07920W_A:NSA1:RRP8:C2_08530C_A:MSU1:RRP15:SMM1:CWC22:C2_10740C_A:C2_10810W_A:C3_00100W_A:BUD21:C3_00660W_A:BMS1:UTP20:NCE103:C3_01310W_A:C3_02020W_A:C3_02040C_A:C3_02670W_A:C3_02840W_A:C3_02850C_A:C3_03330C_A:C3_04370C_A:SFP1:NOP14:QDR2:C3_05800W_A:C3_06150W_A:ISW2:C3_06370C_A:PRP5:C3_07550C_A:RAD4:C3_07800C_A:DUR4:NMD5:C4_00690C_A:RAT1:C4_01280C_A:SLX4:HIT1:SAS10:RPC53:C4_02880C_A:NUP84:C4_03830W_A:C4_04520W_A:BAS1:C4_05260W_A:C4_05650W_A:C4_06790W_A:C4_07060W_A:C4_07150W_A:C5_01430C_A:SPB4:C5_02010C_A:C5_02070C_A:RIX7:C5_02440C_A:SPR28:UTP13:C5_03010W_A:RMS1:C5_03920C_A:C5_04120C_A:C5_04840C_A:C5_04910W_A:GRF10:C5_05340W_A:NOP5:C6_02230W_A:C6_02430W_A:C6_02900C_A:POP4:C6_03440W_A:C6_04240W_A:C7_00220W_A:C7_01360C_A:LIG1:C7_02460C_A:C7_02930C_A:C7_03400C_A:C7_03590C_A:C7_03850W_A:C7_04150W_A:UTP18:PWP2:DAL81:CR_01700C_A:CR_02030C_A:CR_02420W_A:RRP9:CR_02890C_A:SMC5:CR_03200C_A:CR_03360W_A:NCS2:YVH1:SMC1:CR_03940W_A:CR_04710W_A:CR_05550C_A:DBP8:RFX1:CR_06230W_A:CR_06450W_A:RRN11:CR_06680C_A:POL2:PIF1:FUN30:DBP6:IMP4:CR_08000C_A:RIO2:ATS1:CR_08330W_A:CR_08410W_A:MPS1:CR_09740W_A:CR_09800C_A:CR_10260W_A |
|-----|-------------------------------------------------------------------------------------------------|------------------------------|----------------------------------------|----------|-------|-----------------------------------------------------------------------------------------------------------------------------------------------------------------------------------------------------------------------------------------------------------------------------------------------------------------------------------------------------------------------------------------------------------------------------------------------------------------------------------------------------------------------------------------------------------------------------------------------------------------------------------------------------------------------------------------------------------------------------------------------------------------------------------------------------------------------------------------------------------------------------------------------------------------------------------------------------------------------------------------------------------------------------------------------------------------------------------------------------------------------------------------------------------------------------------------------------------------------------------------------------------------------------------------------------------------------------------------------------------------------------------------------------------------------------------------------------------------------------------------------------------------------------------------------------------------------------------------------------------------------------------------------------------------------------------------------------------------------------------------------------------------------------------------------------------------|

|      |                                     |                              |                                          |          |       |                                                                                                                                                                                                                                                                                                                                                                                                                                                                                                                                                                                                                                                                                                                                                                                                                                                                                                                                                                                                                                                                                                                                                                                                                                                                                                                                                                                                                                                                                                                                                                                                                                                                                                                                                                                                                                                                                                                                                                                                                                                                                                                                                                                                                                                                                                                                                                                                                                                                                                                                                                                                                                                                      |
|------|-------------------------------------|------------------------------|------------------------------------------|----------|-------|----------------------------------------------------------------------------------------------------------------------------------------------------------------------------------------------------------------------------------------------------------------------------------------------------------------------------------------------------------------------------------------------------------------------------------------------------------------------------------------------------------------------------------------------------------------------------------------------------------------------------------------------------------------------------------------------------------------------------------------------------------------------------------------------------------------------------------------------------------------------------------------------------------------------------------------------------------------------------------------------------------------------------------------------------------------------------------------------------------------------------------------------------------------------------------------------------------------------------------------------------------------------------------------------------------------------------------------------------------------------------------------------------------------------------------------------------------------------------------------------------------------------------------------------------------------------------------------------------------------------------------------------------------------------------------------------------------------------------------------------------------------------------------------------------------------------------------------------------------------------------------------------------------------------------------------------------------------------------------------------------------------------------------------------------------------------------------------------------------------------------------------------------------------------------------------------------------------------------------------------------------------------------------------------------------------------------------------------------------------------------------------------------------------------------------------------------------------------------------------------------------------------------------------------------------------------------------------------------------------------------------------------------------------------|
| 6807 | nitrogen compound metabolic process | 785 out of 1061 genes, 74.0% | 3438 out of 6473 background genes, 53.1% | 4.11E-49 | 0.00% | RIM8:LEU4:HBR1:C1_00510W_A:CNS1:RPO41:SPE1:NRM1:RRS1:TRI1:NMA111:HMT1:C1_01150C_A:C1_01160C_A:TRM2:ABC1:C1_01530C_A:CYS4:C1_02090C_A:ABP140:CWH8:C1_02380C_A:C1_02390W_A:C1_02450C_A:SNZ1:SNO1:HOM6:LYS2:PDE2:MIA40:C1_02900C_A:C1_02970W_A:TSR2:C1_03260W_A:C1_03370W_A:C1_03540C_A:C1_03630W_A:C1_03790C_A:RPP1:C1_03830C_A:KTR4:C1_04040C_A:C1_04120C_A:ERB1:RPN4:NOP4:C1_04510W_A:C1_04530C_A:C1_04710C_A:MRPL37:C1_04970W_A:RHD1:ARG2:RRP6:REI1:TRY2:ARO4:C1_05220C_A:C1_05270C_A:C1_05360C_A:C1_05380C_A:RSM22:RPS27A:C1_05630C_A:FAL1:C1_05650W_A:RAD10:C1_05990C_A:BUD16:C1_06530C_A:C1_06540C_A:NOP6:C1_06760C_A:RIA1:YMC1:C1_07340W_A:C1_07470C_A:LHP1:C1_07510W_A:C1_07660W_A:ADE4:ECO1:C1_07850C_A:GCS1:ADE5,7:MRPL3:ERD1:C1_07950C_A:C1_07960W_A:FUN12:DRG1:CAT8:MLT1:DIP2:SAM4:GCR3:C1_08520C_A:GCD6:C1_08630W_A:MSS116:C1_08890C_A:C1_09040C_A:CEF1:C1_09390W_A:GUA1:C1_09610W_A:C1_09710C_A:C1_09790C_A:C1_09840C_A:BUD31:C1_09910C_A:PDC2:DBP3:MNN23:C1_10080W_A:C1_10200C_A:C1_10340W_A:FCY23:C1_10620W_A:APN2:RPA190:C1_10690W_A:NIT3:C1_10920W_A:C1_10950C_A:C1_10970W_A:C1_11000C_A:PET127:FGR39:NEP1:KR1:SAM2:GAR1:C1_11610C_A:C1_11790W_A:MUP1:C1_11880W_A:C1_11900C_A:C1_11910W_A:SER33:TRP3:C1_12280C_A:CSI2:MRPS9:C1_12350W_A:WRS1:C1_12440W_A:C1_12570C_A:C1_12630C_A:C1_12640W_A:C1_12670C_A:C1_12750C_A:C1_12760W_A:FEN1:C1_12820C_A:RPL14:C1_13060C_A:REX3:C1_13330C_A:RMP1:C1_13380W_A:AGC1:KNS1:MCU1:C1_13560W_A:C1_13820C_A:MET3:YBP1:C1_14080W_A:C1_14160W_A:C1_14330W_A:MPP10:FAV3:C2_00200W_A:C2_00280C_A:C2_00390C_A:C2_00410C_A:C2_00620C_A:C2_00820W_A:C2_00840W_A:MXR1:C2_01060C_A:C2_01070W_A:C2_01220W_A:C2_01240C_A:ESC4:CLB2:C2_01420C_A:APT1:REX2:C2_01740C_A:C2_01820C_A:PRP39:C2_01860C_A:C2_01870C_A:ARO3:C2_02120W_A:SAM37:C2_02270C_A:C2_02420C_A:UTP21:UTP22:C2_02490C_A:PRS1:C2_02540W_A:C2_02630W_A:PDR17:SER2:C2_02930C_A:MET1:BNA31:SMP3:C2_03130W_A:PRP3:C2_03560C_A:C2_03700W_A:C2_03830W_A:GPI13:SCH9:C2_03950W_A:C2_04120C_A:UGA1:TBF1:BAT21:SUV3:RIM2:MED8:C2_04570W_A:SNU114:C2_04700C_A:C2_04820W_A:PZF1:CKA2:C2_04990W_A:C2_05050C_A:C2_05080C_A:MAK5:C2_05160C_A:CDC21:SGO1:RPF2:C2_05270W_A:RPC40:KTI11:C2_05670C_A:C2_05750W_A:C2_05830C_A:C2_05840W_A:IDP1:LAS1:CSM3:ECM17:ILV1:SER1:MAK16:C2_06480W_A:C2_06520C_A:C2_06530W_A:VAS1:C2_06650C_A:C2_06660W_A:AMO2:RPL11:FHL1:C2_06850W_A:C2_06950C_A:SPE3:AAH1:RCK2:C2_07270W_A:NOC4:C2_07360W_A:RCL1:C2_07680W_A:PHO86:C2_07860W_A:PRS5:C2_07920W_A:NSA1:C2_08180C_A:C2_08200W_A:EAF3:RRP8:C2_08530C_A:MSU1:UTP15:MFG1:APE3:CDC47:ASN1:C2_09160W_A:C2_09180W_A:MED18:C2_09310C_A:PES1:TAZ1:RRP15:C2_09500W_A:C2_09660W_A:LEU42:SMM1:C2_09920W_A:C |
|------|-------------------------------------|------------------------------|------------------------------------------|----------|-------|----------------------------------------------------------------------------------------------------------------------------------------------------------------------------------------------------------------------------------------------------------------------------------------------------------------------------------------------------------------------------------------------------------------------------------------------------------------------------------------------------------------------------------------------------------------------------------------------------------------------------------------------------------------------------------------------------------------------------------------------------------------------------------------------------------------------------------------------------------------------------------------------------------------------------------------------------------------------------------------------------------------------------------------------------------------------------------------------------------------------------------------------------------------------------------------------------------------------------------------------------------------------------------------------------------------------------------------------------------------------------------------------------------------------------------------------------------------------------------------------------------------------------------------------------------------------------------------------------------------------------------------------------------------------------------------------------------------------------------------------------------------------------------------------------------------------------------------------------------------------------------------------------------------------------------------------------------------------------------------------------------------------------------------------------------------------------------------------------------------------------------------------------------------------------------------------------------------------------------------------------------------------------------------------------------------------------------------------------------------------------------------------------------------------------------------------------------------------------------------------------------------------------------------------------------------------------------------------------------------------------------------------------------------------|

|  |  |  |  |  |                                                                                                                                                                                                                                                                                                                                                                                                                                                                                                                                                                                                                                                                                                                                                                                                                                                                                                                                                                                                                                                                                                                                                                                                                                                                                                                                                                                                                                                                                                                                                                                                                                                                                                                                                                                                                                                                                                                                                                                                                                                                                                                                                                                                                                                                                                                                                                                                                                                                                                                                                                                                                |
|--|--|--|--|--|----------------------------------------------------------------------------------------------------------------------------------------------------------------------------------------------------------------------------------------------------------------------------------------------------------------------------------------------------------------------------------------------------------------------------------------------------------------------------------------------------------------------------------------------------------------------------------------------------------------------------------------------------------------------------------------------------------------------------------------------------------------------------------------------------------------------------------------------------------------------------------------------------------------------------------------------------------------------------------------------------------------------------------------------------------------------------------------------------------------------------------------------------------------------------------------------------------------------------------------------------------------------------------------------------------------------------------------------------------------------------------------------------------------------------------------------------------------------------------------------------------------------------------------------------------------------------------------------------------------------------------------------------------------------------------------------------------------------------------------------------------------------------------------------------------------------------------------------------------------------------------------------------------------------------------------------------------------------------------------------------------------------------------------------------------------------------------------------------------------------------------------------------------------------------------------------------------------------------------------------------------------------------------------------------------------------------------------------------------------------------------------------------------------------------------------------------------------------------------------------------------------------------------------------------------------------------------------------------------------|
|  |  |  |  |  | <p>WC22:UBP8:PUS7:HEM3:C2_10740C_A:RPC11:C2_10810W_A:RPS24:C3_00100W_A:ULP3:UTP8:BUD21:SOF1:C3_00660W_A:C3_00830C_A:BMS1:ARP9:UTP20:NCE103:C3_01310W_A:URA3:MET18:RKI1:RPS7A:C3_01520C_A:C3_01560W_A:PPT1:SCM3:C3_02020W_A:C3_02040C_A:UTP4:C3_02180C_A:ILV2:C3_02350W_A:PHA2:DDC1:C3_02670W_A:SMC3:C3_02750W_A:C3_02840W_A:C3_02850C_A:MET13:C3_03070W_A:C3_03110W_A:C3_03330C_A:YAH1:C3_03470W_A:ULP1:C3_03560W_A:HBR3:RAD53:C3_04370C_A:C3_04380C_A:ADE2:MAK21:RPS15:RPP2B:ARV1:SFP1:NOP14:CEM1:C3_05140C_A:C3_05160C_A:WOR2:RPL8B:C3_05280C_A:C3_05380W_A:GPI1:C3_05440C_A:C3_05510W_A:QDR2:BAT22:C3_05800W_A:C3_05860C_A:TRM12:C3_05900W_A:CTA4:NOG1:C3_06150W_A:MMS21:CYM1:C3_06240C_A:C3_06270C_A:DOT1:ISW2:C3_06370C_A:NSA2:OPI3:C3_06600C_A:FUN31:C3_06630W_A:PRP5:C3_06830C_A:RPS12:NOP13:C3_07400W_A:C3_07550C_A:C3_07570C_A:RIT1:RAD4:UTP9:C3_07800C_A:HIS4:MET15:DUR4:RLP24:NMD5:HIS5:C4_00690C_A:C4_00700C_A:C4_00740W_A:MLH1:C4_00800W_A:C4_00810C_A:C4_00880W_A:ARO1:C4_00940W_A:PTC8:RAT1:AAT22:C4_01280C_A:PGA53:ILV6:PWP1:C4_01470W_A:NIP1:C4_01500W_A:C4_01560C_A:TOA2:HSX11:TIM10:ZCF25:C4_02400C_A:SLX4:HIT1:C4_02770C_A:SAS10:RPC53:HCA4:C4_02850W_A:ZUO1:C4_02880C_A:NAN1:C4_03140C_A:C4_03170W_A:DAO2:C4_03410W_A:RAD2:C4_03720C_A:C4_03730C_A:C4_03740W_A:NUP84:C4_03830W_A:RRP42:C4_03870C_A:RAM1:FGR28:ECM1:C4_04130W_A:DUO1:C4_04390W_A:SAP10:C4_04520W_A:SSZ1:BAS1:C4_04810C_A:AGP3:RPL30:C4_05230C_A:C4_05260W_A:C4_05360C_A:OFD1:HOM3:C4_05650W_A:C4_05890W_A:TRP5:C4_06210C_A:C4_06410W_A:NOP1:C4_06790W_A:C4_06950W_A:MET16:C4_07060W_A:TRP4:C4_07140W_A:C4_07150W_A:C5_00030W_A:C5_00260W_A:C5_00280C_A:DUS4:C5_00320W_A:MRP17:MET14:IFG3:EXO1:RMT2:SPE2:C5_00820W_A:C5_00920W_A:BUD23:CYC3:C5_01140C_A:PUS4:C5_01430C_A:FYV5:SPB4:C5_01610W_A:CCN1:C5_01700W_A:C5_01930W_A:C5_02010C_A:C5_02070C_A:RIX7:THR4:PDE1:C5_02440C_A:TIF5:SPR28:UTP13:C5_02590C_A:BUR2:C5_02740W_A:CKB2:MSW1:C5_02780W_A:C5_02820C_A:C5_03010W_A:RMS1:CAM1-1:C5_03290C_A:PCL1:RPO26:FUR1:C5_03400C_A:C5_03460C_A:C5_03530C_A:MDJ1:C5_03640W_A:C5_03700C_A:C5_03840W_A:HAM1:C5_03920C_A:C5_03970W_A:C5_04120C_A:SAH1:C5_04290C_A:C5_04340W_A:URA7:CSU57:MSM1:C5_04720C_A:HYS2:HAS1:C5_04840C_A:C5_04910W_A:GRF10:C5_05250C_A:SDH4:HIS1:C5_05340W_A:ILV3:DNA2:NOP5:C6_00530C_A:C6_00560W_A:FCA1:C6_00640C_A:CDC14:C6_00760W_A:TOP1:C6_01040C_A:CIP1:C6_01120C_A:CIC1:PMP1:TIF3:RAD18:HCH1:C6_01890C_A:C6_01980C_A:SWD3:C6_02230W_A:RPL10A:ALG11:C6_02280W_A:C6_02290C_A:C6_02300C_A:C6_02350C_A:C6_02370C_A:C6_02430W_A:PRP45:C6_02690C_A:MRT4:C6_02900C_A:POP4:C6_03210C_A:ARP4:C6_03380W_A:C6</p> |
|--|--|--|--|--|----------------------------------------------------------------------------------------------------------------------------------------------------------------------------------------------------------------------------------------------------------------------------------------------------------------------------------------------------------------------------------------------------------------------------------------------------------------------------------------------------------------------------------------------------------------------------------------------------------------------------------------------------------------------------------------------------------------------------------------------------------------------------------------------------------------------------------------------------------------------------------------------------------------------------------------------------------------------------------------------------------------------------------------------------------------------------------------------------------------------------------------------------------------------------------------------------------------------------------------------------------------------------------------------------------------------------------------------------------------------------------------------------------------------------------------------------------------------------------------------------------------------------------------------------------------------------------------------------------------------------------------------------------------------------------------------------------------------------------------------------------------------------------------------------------------------------------------------------------------------------------------------------------------------------------------------------------------------------------------------------------------------------------------------------------------------------------------------------------------------------------------------------------------------------------------------------------------------------------------------------------------------------------------------------------------------------------------------------------------------------------------------------------------------------------------------------------------------------------------------------------------------------------------------------------------------------------------------------------------|



|  |  |  |  |  |  |                                                                                                                                                                                                                                                                                                                                                                                                                                                                                                                                                                                                                                                                                                                                                                                                                                                                                                                                                                                                                                                                                                                                                                                                                                                                                                                                                                                                                                                                                                                                                                                                               |
|--|--|--|--|--|--|---------------------------------------------------------------------------------------------------------------------------------------------------------------------------------------------------------------------------------------------------------------------------------------------------------------------------------------------------------------------------------------------------------------------------------------------------------------------------------------------------------------------------------------------------------------------------------------------------------------------------------------------------------------------------------------------------------------------------------------------------------------------------------------------------------------------------------------------------------------------------------------------------------------------------------------------------------------------------------------------------------------------------------------------------------------------------------------------------------------------------------------------------------------------------------------------------------------------------------------------------------------------------------------------------------------------------------------------------------------------------------------------------------------------------------------------------------------------------------------------------------------------------------------------------------------------------------------------------------------|
|  |  |  |  |  |  | <p>_03390W_A:C6_03440W_A:NAM2:SPB1:C6_04240W_A:NOP8:ILS1:C6_04530C_A:C7_00160C_A:C7_00220W_A:C7_00330C_A:DCC1:PSF3:THG1:RPA135:NOP15:YML6:C7_01020C_A:C7_01030C_A:DBP7:C7_01210C_A:ASC1:C7_01270C_A:PSF1:C7_01360C_A:C7_01400C_A:GIR2:PRT1:FLU1:C7_01570C_A:SMC6:C7_01600W_A:C7_01950W_A:LIG1:C7_02340C_A:C7_02460C_A:C7_02660C_A:C7_02930C_A:IFM1:C7_03400C_A:ISY1:ENP2:ARG4:C7_03590C_A:ENP1:HIS7:MRP7:C7_03850W_A:C7_03880C_A:C7_04150W_A:UTP18:MIS12:MMS22:RTT109:CR_00430C_A:CR_00460C_A:MRPL6:ADE1:BUD22:PWP2:CR_00830W_A:TRM1:DAL81:CTF18:CR_01260W_A:CR_01320C_A:CR_01410C_A:PRS:CR_01550C_A:TRP2:CR_01600C_A:MET6:CR_01670W_A:CD60:CR_01700C_A:CR_01710W_A:CR_01780W_A:CR_01950W_A:CR_02030C_A:MCM6:MET2:ERG25:CR_02420W_A:CR_02430C_A:CHO2:CR_02550C_A:PAN6:RRP9:RPC31:CR_02890C_A:SRP40:ARC1:SMC5:CR_03110W_A:CR_03200C_A:CR_03230W_A:CR_03340C_A:CR_03360W_A:KTI12:MTG1:CR_03400W_A:CR_03440W_A:NCS2:YVH1:SGD1:SMC1:PRP42:CR_03760W_A:CR_03940W_A:CR_04110W_A:CR_04160C_A:CR_04170W_A:CR_04240C_A:CR_04300W_A:CR_04500C_A:CR_04560C_A:CR_04710W_A:ADE6:RPB8:CR_04920W_A:NOC2:CR_05550C_A:RNR3:MTG2:DBP8:RFX1:RPL7:CR_06230W_A:FGR50:CR_06450W_A:RRN11:HSP60:CR_06680C_A:NMD3:CR_06840W_A:ATX1:CR_06970C_A:CR_06980W_A:POL2:MIS11:CR_07030C_A:URA2:CR_07310W_A:PIF1:CR_07480W_A:FUN30:CR_07640C_A:ARO2:CDC45:DBP6:ASF1:IMP4:CR_08000C_A:NOP10:SSB1:RIO2:ATS1:CR_08330W_A:CYS3:RPP2A:GSH2:CR_08410W_A:TSR1:CR_08940W_A:MPS1:CR_09010C_A:CR_09310W_A:SSF1:CR_09740W_A:MED21:CR_09800C_A:DPB2:SIK1:CR_09990W_A:CR_10180W_A:UTP5:CR_10260W_A:CR_10410C_A:CR_10470C_A:MCD1:DRS1:YHB4:PRO1:LTV1:POP3</p> |
|--|--|--|--|--|--|---------------------------------------------------------------------------------------------------------------------------------------------------------------------------------------------------------------------------------------------------------------------------------------------------------------------------------------------------------------------------------------------------------------------------------------------------------------------------------------------------------------------------------------------------------------------------------------------------------------------------------------------------------------------------------------------------------------------------------------------------------------------------------------------------------------------------------------------------------------------------------------------------------------------------------------------------------------------------------------------------------------------------------------------------------------------------------------------------------------------------------------------------------------------------------------------------------------------------------------------------------------------------------------------------------------------------------------------------------------------------------------------------------------------------------------------------------------------------------------------------------------------------------------------------------------------------------------------------------------|

|       |                                     |                              |                                          |          |       |                                                                                                                                                                                                                                                                                                                                                                                                                                                                                                                                                                                                                                                                                                                                                                                                                                                                                                                                                                                                                                                                                                                                                                                                                                                                                                                                                                                                                                                                                                                                                                                                                                                                                                                                                                                                                                                                                                                                                                                                                                                                                                                                                                                                                                                                                                                                                                                                                                                                                                                                                                                                                                                                          |
|-------|-------------------------------------|------------------------------|------------------------------------------|----------|-------|--------------------------------------------------------------------------------------------------------------------------------------------------------------------------------------------------------------------------------------------------------------------------------------------------------------------------------------------------------------------------------------------------------------------------------------------------------------------------------------------------------------------------------------------------------------------------------------------------------------------------------------------------------------------------------------------------------------------------------------------------------------------------------------------------------------------------------------------------------------------------------------------------------------------------------------------------------------------------------------------------------------------------------------------------------------------------------------------------------------------------------------------------------------------------------------------------------------------------------------------------------------------------------------------------------------------------------------------------------------------------------------------------------------------------------------------------------------------------------------------------------------------------------------------------------------------------------------------------------------------------------------------------------------------------------------------------------------------------------------------------------------------------------------------------------------------------------------------------------------------------------------------------------------------------------------------------------------------------------------------------------------------------------------------------------------------------------------------------------------------------------------------------------------------------------------------------------------------------------------------------------------------------------------------------------------------------------------------------------------------------------------------------------------------------------------------------------------------------------------------------------------------------------------------------------------------------------------------------------------------------------------------------------------------------|
| 71704 | organic substance metabolic process | 804 out of 1061 genes, 75.8% | 3737 out of 6473 background genes, 57.7% | 1.26E-37 | 0.00% | RIM8:LEU4:HBR1:C1_00510W_A:CNS1:RPO41:SPE1:NRM1:RRS1:TRI1:NMA111:HMT1:C1_01150C_A:C1_01160C_A:TRM2:ABC1:C1_01530C_A:CYS4:C1_02090C_A:ABP140:CWH8:C1_02380C_A:C1_02390W_A:C1_02450C_A:SNZ1:SNO1:HOM6:LYS2:PDE2:MIA40:C1_02900C_A:C1_02970W_A:TSR2:C1_03260W_A:C1_03370W_A:C1_03540C_A:C1_03630W_A:C1_03790C_A:RPP1:C1_03830C_A:KTR4:C1_04040C_A:C1_04120C_A:ERB1:RPN4:NOP4:C1_04510W_A:C1_04530C_A:C1_04710C_A:MRPL37:C1_04970W_A:RHD1:ARG2:RRP6:REI1:TRY2:ARO4:C1_05220C_A:C1_05270C_A:C1_05360C_A:C1_05380C_A:RSM22:RPS27A:C1_05630C_A:FAL1:C1_05650W_A:RAD10:C1_05930C_A:C1_05990C_A:BUD16:C1_06530C_A:C1_06540C_A:NOP6:C1_06760C_A:RIA1:YMC1:C1_07340W_A:C1_07470C_A:LHP1:C1_07510W_A:C1_07660W_A:ADE4:ECO1:C1_07850C_A:GCS1:ADE5,7:MRPL3:ERD1:C1_07950C_A:C1_07960W_A:FUN12:DRG1:CAT8:MLT1:DIP2:SAM4:GCR3:UPC2:C1_08520C_A:GCD6:C1_08630W_A:MSS116:C1_08890C_A:C1_09040C_A:CEF1:C1_09390W_A:GUA1:C1_09610W_A:C1_09710C_A:C1_09790C_A:C1_09840C_A:BUD31:C1_09910C_A:PDC2:DBP3:MNN23:C1_10080W_A:C1_10200C_A:C1_10340W_A:FCY23:C1_10620W_A:APN2:RPA190:C1_10690W_A:C1_10920W_A:C1_10950C_A:C1_10970W_A:C1_11000C_A:PET127:FR39:NEP1:KRR1:SAM2:GAR1:C1_11610C_A:C1_11790W_A:MUP1:C1_11880W_A:C1_11900C_A:C1_11910W_A:SER33:TRP3:C1_12280C_A:CSI2:MRPS9:C1_12350W_A:WRS1:C1_12440W_A:C1_12570C_A:C1_12630C_A:C1_12640W_A:C1_12670C_A:C1_12750C_A:C1_12760W_A:FEN1:C1_12820C_A:RPL14:C1_13060C_A:REX3:C1_13330C_A:RMP1:C1_13380W_A:KNS1:MCU1:C1_13560W_A:C1_13820C_A:MET3:YBP1:C1_14080W_A:C1_14160W_A:C1_14330W_A:MPP10:FAV3:C2_00200W_A:C2_00280C_A:C2_00390C_A:C2_00410C_A:C2_00620C_A:C2_00820W_A:C2_00840W_A:MXR1:C2_01060C_A:C2_01070W_A:C2_01220W_A:C2_01240C_A:ESC4:CLB2:C2_01420C_A:APT1:REX2:C2_01740C_A:C2_01820C_A:PRP39:C2_01860C_A:C2_01870C_A:ARO3:C2_02120W_A:SAM37:C2_02270C_A:C2_02420C_A:UTP21:UTP22:C2_02490C_A:PRS1:C2_02540W_A:C2_02630W_A:PDR17:SER2:C2_02930C_A:MET1:BNA31:SMP3:C2_03130W_A:PRP3:C2_03560C_A:MNN42:C2_03700W_A:C2_03830W_A:GPI13:SCH9:C2_03950W_A:C2_04120C_A:UGA1:TBF1:BAT21:C2_04340C_A:SUV3:RIM2:MED8:C2_04570W_A:SNU114:C2_04700C_A:C2_04820W_A:PZF1:CKA2:C2_04990W_A:C2_05050C_A:C2_05080C_A:MAK5:C2_05160C_A:CDC21:SGO1:RPF2:C2_05270W_A:RPC40:KTI11:C2_05670C_A:C2_05750W_A:C2_05830C_A:C2_05840W_A:IDP1:C2_05980C_A:LAS1:CSM3:ECM17:ILV1:SER1:MAK16:C2_06480W_A:C2_06520C_A:C2_06530W_A:VAS1:C2_06650C_A:C2_06660W_A:AMO2:RPL11:FHL1:C2_06850W_A:C2_06950C_A:SPE3:AAH1:RCK2:DQD1:C2_07270W_A:NOC4:C2_07360W_A:C2_07410W_A:RCL1:C2_07680W_A:PHO86:C2_07860W_A:PRS5:C2_07920W_A:NSA1:C2_08180C_A:C2_08200W_A:EAF3:RRP8:C2_08530C_A:MSU1:UTP15:MFG1:AP3:E3:CDC47:ASN1:C2_09160W_A:C2_09180W_A:MED18:C2_09310C_A:PES1:TAZ1:RR |
|-------|-------------------------------------|------------------------------|------------------------------------------|----------|-------|--------------------------------------------------------------------------------------------------------------------------------------------------------------------------------------------------------------------------------------------------------------------------------------------------------------------------------------------------------------------------------------------------------------------------------------------------------------------------------------------------------------------------------------------------------------------------------------------------------------------------------------------------------------------------------------------------------------------------------------------------------------------------------------------------------------------------------------------------------------------------------------------------------------------------------------------------------------------------------------------------------------------------------------------------------------------------------------------------------------------------------------------------------------------------------------------------------------------------------------------------------------------------------------------------------------------------------------------------------------------------------------------------------------------------------------------------------------------------------------------------------------------------------------------------------------------------------------------------------------------------------------------------------------------------------------------------------------------------------------------------------------------------------------------------------------------------------------------------------------------------------------------------------------------------------------------------------------------------------------------------------------------------------------------------------------------------------------------------------------------------------------------------------------------------------------------------------------------------------------------------------------------------------------------------------------------------------------------------------------------------------------------------------------------------------------------------------------------------------------------------------------------------------------------------------------------------------------------------------------------------------------------------------------------------|

|  |  |  |  |  |  |                                                                                                                                                                                                                                                                                                                                                                                                                                                                                                                                                                                                                                                                                                                                                                                                                                                                                                                                                                                                                                                                                                                                                                                                                                                                                                                                                                                                                                                                                                                                                                                                                                                                                                                                                                                                                                                                                                                                                                                                                                                                                                                                                                                                                                                                                                                                                                                                                                                                                                                                                                                                                |
|--|--|--|--|--|--|----------------------------------------------------------------------------------------------------------------------------------------------------------------------------------------------------------------------------------------------------------------------------------------------------------------------------------------------------------------------------------------------------------------------------------------------------------------------------------------------------------------------------------------------------------------------------------------------------------------------------------------------------------------------------------------------------------------------------------------------------------------------------------------------------------------------------------------------------------------------------------------------------------------------------------------------------------------------------------------------------------------------------------------------------------------------------------------------------------------------------------------------------------------------------------------------------------------------------------------------------------------------------------------------------------------------------------------------------------------------------------------------------------------------------------------------------------------------------------------------------------------------------------------------------------------------------------------------------------------------------------------------------------------------------------------------------------------------------------------------------------------------------------------------------------------------------------------------------------------------------------------------------------------------------------------------------------------------------------------------------------------------------------------------------------------------------------------------------------------------------------------------------------------------------------------------------------------------------------------------------------------------------------------------------------------------------------------------------------------------------------------------------------------------------------------------------------------------------------------------------------------------------------------------------------------------------------------------------------------|
|  |  |  |  |  |  | <p>P15:C2_09500W_A:C2_09660W_A:LEU42:SMM1:C2_09920W_A:CWC22:UBP8:GPD1:PUS7:HEM3:C2_10740C_A:RPC11:C2_10810W_A:RPS24:C3_00100W_A:ULP3:RHR2:UTP8:BUD21:SOF1:C3_00660W_A:C3_00830C_A:BMS1:ARP9:UTP20:NCE103:C3_01310W_A:URA3:MET18:RKI1:RPS7A:C3_01520C_A:C3_01560W_A:PPT1:SCM3:C3_02020W_A:C3_02040C_A:UTP4:C3_02180C_A:ILV2:C3_02350W_A:PHA2:DDC1:C3_02670W_A:SMC3:C3_02750W_A:C3_02840W_A:C3_02850C_A:MET13:C3_03070W_A:C3_03110W_A:C3_03330C_A:YAH1:C3_03470W_A:ULP1:C3_03560W_A:HBR3:RAD53:ATF1:C3_04370C_A:C3_04380C_A:ADE2:MAK21:RPS15:RPP2B:ARV1:SFP1:NOP14:CEM1:C3_05140C_A:C3_05160C_A:WOR2:RPL8B:C3_05280C_A:C3_05380W_A:GPI1:C3_05440C_A:C3_05510W_A:QDR2:BAT22:C3_05800W_A:C3_05860C_A:TRM12:C3_05900W_A:CTA4:NOG1:C3_06150W_A:MMS21:CYM1:C3_06240C_A:C3_06270C_A:DOT1:ISW2:C3_06370C_A:NSA2:OPI3:C3_06600C_A:FUN31:C3_06630W_A:PRP5:C3_06830C_A:RPS12:NOP13:C3_07400W_A:C3_07550C_A:C3_07570C_A:RIT1:RAD4:UTP9:C3_07800C_A:HIS4:MET15:DUR4:RLP24:NMD5:HIS5:C4_00690C_A:C4_00700C_A:C4_00740W_A:MLH1:C4_00800W_A:C4_00810C_A:C4_00880W_A:ARO1:C4_00940W_A:PTC8:RAT1:AAT22:C4_01280C_A:PGA53:ILV6:PWP1:C4_01470W_A:NIP1:C4_01500W_A:C4_01560C_A:TOA2:HSX11:TIM10:ZCF25:C4_02400C_A:SLX4:HIT1:C4_02770C_A:SAS10:RPC53:HCA4:C4_02850W_A:ZUO1:C4_02880C_A:NAN1:C4_03140C_A:C4_03170W_A:DAO2:C4_03410W_A:RAD2:C4_03720C_A:C4_03730C_A:C4_03740W_A:NUP84:C4_03830W_A:RRP42:C4_03870C_A:RAM1:FGR28:ECM1:C4_04130W_A:DUO1:C4_04390W_A:SAP10:C4_04520W_A:SSZ1:BAS1:C4_04810C_A:AGP3:RPL30:C4_05230C_A:C4_05260W_A:C4_05360C_A:OFD1:HOM3:C4_05650W_A:C4_05890W_A:TRP5:C4_06210C_A:C4_06410W_A:NOP1:C4_06790W_A:C4_06950W_A:MET16:C4_07060W_A:TRP4:C4_07140W_A:C4_07150W_A:C5_00030W_A:C5_00260W_A:C5_00280C_A:DUS4:C5_00320W_A:MRP17:MET14:IFG3:EXO1:RMT2:SPE2:C5_00820W_A:C5_00920W_A:BUD23:CYC3:C5_01140C_A:PUS4:C5_01430C_A:FYV5:SPB4:C5_01610W_A:CCN1:C5_01700W_A:C5_01930W_A:C5_02010C_A:C5_02070C_A:RIX7:THR4:PDE1:C5_02440C_A:TIF5:SPR28:UTP13:C5_02590C_A:BUR2:C5_02740W_A:CKB2:MSW1:C5_02780W_A:C5_02820C_A:C5_03010W_A:RMS1:CAM1-1:C5_03290C_A:PCL1:RPO26:FUR1:C5_03400C_A:C5_03460C_A:C5_03530C_A:C5_03550W_A:MDJ1:C5_03640W_A:C5_03700C_A:C5_03840W_A:HAM1:C5_03920C_A:C5_03970W_A:C5_04120C_A:SAH1:C5_04290C_A:C5_04340W_A:URA7:CSU57:MSM1:C5_04720C_A:HYS2:HAS1:C5_04840C_A:C5_04910W_A:C5_05000C_A:GRF10:C5_05250C_A:SDH4:HIS1:C5_05340W_A:ILV3:DNA2:NOP5:C6_00530C_A:C6_00560W_A:FCA1:C6_00640C_A:CDC14:C6_00760W_A:TOP1:HAL22:C6_01040C_A:CIP1:C6_01120C_A:CIC1:EBP1:C6_01300W_A:PMP1:TIF3:RAD18:HCH1:C6_01890C_A:C6_01980C_A:SWD3:C6_02230W_A:RPL10A:ALG11:C6_02280W_A:C6_02290C_A:C6_02</p> |
|--|--|--|--|--|--|----------------------------------------------------------------------------------------------------------------------------------------------------------------------------------------------------------------------------------------------------------------------------------------------------------------------------------------------------------------------------------------------------------------------------------------------------------------------------------------------------------------------------------------------------------------------------------------------------------------------------------------------------------------------------------------------------------------------------------------------------------------------------------------------------------------------------------------------------------------------------------------------------------------------------------------------------------------------------------------------------------------------------------------------------------------------------------------------------------------------------------------------------------------------------------------------------------------------------------------------------------------------------------------------------------------------------------------------------------------------------------------------------------------------------------------------------------------------------------------------------------------------------------------------------------------------------------------------------------------------------------------------------------------------------------------------------------------------------------------------------------------------------------------------------------------------------------------------------------------------------------------------------------------------------------------------------------------------------------------------------------------------------------------------------------------------------------------------------------------------------------------------------------------------------------------------------------------------------------------------------------------------------------------------------------------------------------------------------------------------------------------------------------------------------------------------------------------------------------------------------------------------------------------------------------------------------------------------------------------|

|  |  |  |  |  |  |                                                                                                                                                                                                                                                                                                                                                                                                                                                                                                                                                                                                                                                                                                                                                                                                                                                                                                                                                                                                                                                                                                                                                                                                                                                                                                                                                                                                                                                                                                                                                                                                                                                                                                                                                                |
|--|--|--|--|--|--|----------------------------------------------------------------------------------------------------------------------------------------------------------------------------------------------------------------------------------------------------------------------------------------------------------------------------------------------------------------------------------------------------------------------------------------------------------------------------------------------------------------------------------------------------------------------------------------------------------------------------------------------------------------------------------------------------------------------------------------------------------------------------------------------------------------------------------------------------------------------------------------------------------------------------------------------------------------------------------------------------------------------------------------------------------------------------------------------------------------------------------------------------------------------------------------------------------------------------------------------------------------------------------------------------------------------------------------------------------------------------------------------------------------------------------------------------------------------------------------------------------------------------------------------------------------------------------------------------------------------------------------------------------------------------------------------------------------------------------------------------------------|
|  |  |  |  |  |  | 300C_A:C6_02350C_A:C6_02370C_A:C6_02420W_A:C6_02430W_A:PRP45:C6_02690C_A:MRT4:C6_02900C_A:POP4:C6_03210C_A:BMT4:ARP4:C6_03380W_A:C6_03390W_A:C6_03440W_A:NAM2:PAD1:SPB1:C6_04240W_A:NOP8:ILS1:C6_04530C_A:C7_00160C_A:C7_00220W_A:C7_00330C_A:DCC1:PSF3:THG1:RPA135:NOP15:YML6:C7_01020C_A:C7_01030C_A:DBP7:C7_01210C_A:ASC1:C7_01270C_A:PSF1:C7_01360C_A:C7_01400C_A:GIR2:PRT1:FLU1:C7_01570C_A:SMC6:C7_01600W_A:C7_01950W_A:LIG1:C7_02340C_A:C7_02460C_A:C7_02660C_A:C7_02930C_A:IFM1:C7_03400C_A:ISY1:ENP2:ARG4:C7_03590C_A:ENP1:HIS7:MRP7:C7_03850W_A:C7_03880C_A:C7_04150W_A:UTP18:MIS12:MMS22:RTT109:CR_00430C_A:CR_00460C_A:MRPL6:ADE1:BUD22:PWP2:CR_00830W_A:TRM1:DAL81:CTF18:CR_01260W_A:CR_01320C_A:CR_01410C_A:PRS:CR_01550C_A:TRP2:CR_01600C_A:MET6:CR_01670W_A:CDC60:CR_01700C_A:CR_01710W_A:CR_01780W_A:CR_01950W_A:CR_02030C_A:MCM6:MET2:ERG25:CR_02420W_A:CR_02430C_A:CHO2:CR_02550C_A:PAN6:RRP9:RPC31:CR_02890C_A:SRP40:ARC1:SMC5:CR_03110W_A:CR_03200C_A:CR_03230W_A:CR_03340C_A:CR_03360W_A:KTI12:MTG1:CR_03400W_A:CR_03440W_A:NCS2:YVH1:SGD1:SMC1:PRP42:CR_03760W_A:CR_03940W_A:MEX67:CR_04110W_A:CR_04160C_A:CR_04170W_A:QDR1:CR_04240C_A:CR_04300W_A:CR_04500C_A:CR_04560C_A:CR_04710W_A:ADE6:RPB8:CR_04920W_A:NOC2:CR_05550C_A:RNR3:MTG2:DBP8:RFX1:RPL7:CR_06230W_A:FGR50:CR_06450W_A:RRN11:HSP60:CR_06680C_A:NMD3:CR_06840W_A:ATX1:CR_06970C_A:CR_06980W_A:POL2:MIS11:CR_07030C_A:URA2:CR_07310W_A:PIF1:CR_07480W_A:FUN30:CR_07640C_A:ARO2:CD45:DBP6:ASF1:IMP4:CR_08000C_A:NOP10:SSB1:RIO2:ATS1:CR_08330W_A:CYS3:RPP2A:GSH2:CR_08410W_A:TSR1:CR_08940W_A:MPS1:CR_09010C_A:CR_09310W_A:ELF1:SSF1:CR_09740W_A:MED21:CR_09800C_A:DPB2:SIK1:CR_09990W_A:CR_10180W_A:UTP5:CR_10260W_A:CR_10410C_A:CR_10470C_A:MCD1:DRS1:YHB4:PRO1:LTV1:POP3 |
|--|--|--|--|--|--|----------------------------------------------------------------------------------------------------------------------------------------------------------------------------------------------------------------------------------------------------------------------------------------------------------------------------------------------------------------------------------------------------------------------------------------------------------------------------------------------------------------------------------------------------------------------------------------------------------------------------------------------------------------------------------------------------------------------------------------------------------------------------------------------------------------------------------------------------------------------------------------------------------------------------------------------------------------------------------------------------------------------------------------------------------------------------------------------------------------------------------------------------------------------------------------------------------------------------------------------------------------------------------------------------------------------------------------------------------------------------------------------------------------------------------------------------------------------------------------------------------------------------------------------------------------------------------------------------------------------------------------------------------------------------------------------------------------------------------------------------------------|

|       |                                               |                              |                                          |          |       |                                                                                                                                                                                                                                                                                                                                                                                                                                                                                                                                                                                                                                                                                                                                                                                                                                                                                                                                                                                                                                                                                                                                                                                                                                                                                                                                                                                                                                                                                                                                                                                                                                                                                                                                                                                                                                                                                                                                                                                                                                                                                                                                                                                                                                                                                                                                                                                                                                                                                                                                                                                                                                                               |
|-------|-----------------------------------------------|------------------------------|------------------------------------------|----------|-------|---------------------------------------------------------------------------------------------------------------------------------------------------------------------------------------------------------------------------------------------------------------------------------------------------------------------------------------------------------------------------------------------------------------------------------------------------------------------------------------------------------------------------------------------------------------------------------------------------------------------------------------------------------------------------------------------------------------------------------------------------------------------------------------------------------------------------------------------------------------------------------------------------------------------------------------------------------------------------------------------------------------------------------------------------------------------------------------------------------------------------------------------------------------------------------------------------------------------------------------------------------------------------------------------------------------------------------------------------------------------------------------------------------------------------------------------------------------------------------------------------------------------------------------------------------------------------------------------------------------------------------------------------------------------------------------------------------------------------------------------------------------------------------------------------------------------------------------------------------------------------------------------------------------------------------------------------------------------------------------------------------------------------------------------------------------------------------------------------------------------------------------------------------------------------------------------------------------------------------------------------------------------------------------------------------------------------------------------------------------------------------------------------------------------------------------------------------------------------------------------------------------------------------------------------------------------------------------------------------------------------------------------------------------|
| 71840 | cellular component organization or biogenesis | 561 out of 1061 genes, 52.9% | 2243 out of 6473 background genes, 34.7% | 1.50E-37 | 0.00% | HBR1:CNS1:RPO41:NRM1:RRS1:TRI1:C1_01160C_A:C1_02090C_A:ABP140:C1_02380C_A:C1_02450C_A:PDE2:MIA40:C1_02900C_A:TSR2:ARX1:C1_03260W_A:C1_03540C_A:C1_03630W_A:C1_03790C_A:RPP1:C1_03830C_A:C1_04040C_A:C1_04120C_A:ERB1:C1_04340C_A:NOP4:C1_04510W_A:C1_04710C_A:C1_04970W_A:RRP6:REI1:TRY2:C1_05210C_A:C1_05220C_A:C1_05270C_A:C1_05360C_A:C1_05380C_A:MTM1:RSM22:RPS27A:FAL1:C1_05650W_A:C1_06530C_A:C1_06540C_A:NOP6:C1_06760C_A:MEF2:RIA1:C1_07340W_A:C1_07470C_A:C1_07510W_A:C1_07660W_A:ECO1:ERD1:C1_07950C_A:C1_07960W_A:FUN12:CAT8:MLT1:DIP2:GCR3:GCD6:C1_08630W_A:MSS116:JIP5:NAR1:C1_09040C_A:CEF1:C1_09390W_A:YTM1:C1_09620C_A:C1_09710C_A:C1_09790C_A:C1_09840C_A:PDC2:DBP3:MNN23:FCY23:C1_10620W_A:RPA190:C1_10920W_A:C1_10950C_A:C1_10970W_A:C1_11000C_A:NEP1:KRR1:GAR1:MUP1:C1_11900C_A:C1_11910W_A:TRP3:C1_12280C_A:CSI2:C1_12350W_A:C1_12440W_A:C1_12570C_A:C1_12630C_A:C1_12640W_A:C1_12680W_A:C1_12750C_A:C1_12760W_A:FEN1:C1_12820C_A:C1_13010W_A:REX3:RMP1:C1_13370W_A:C1_13380W_A:AGC1:COX19:KNS1:MCU1:C1_13560W_A:C1_13820C_A:C1_14080W_A:C1_14330W_A:MPP10:FAV3:C2_00200W_A:C2_00280C_A:C2_00410C_A:C2_00810C_A:C2_00820W_A:C2_00840W_A:C2_01070W_A:C2_01220W_A:C2_01240C_A:CLB2:C2_01420C_A:REX2:C2_01820C_A:PRP39:C2_01860C_A:C2_02120W_A:SAM37:C2_02420C_A:UTP21:UTP22:PRS1:C2_02540W_A:C2_02630W_A:PDR17:C2_02930C_A:MET1:SMP3:PRP3:MNN42:SCH9:C2_04120C_A:TBF1:SUV3:RIM2:C2_04570W_A:SNU114:C2_04700C_A:C2_04820W_A:PZF1:CKA2:C2_05050C_A:C2_05080C_A:MAK5:C2_05160C_A:SGO1:RPF2:C2_05270W_A:C2_05670C_A:C2_05750W_A:C2_05830C_A:C2_05840W_A:LAS1:CSM3:ECM17:MAK16:RTA3:C2_06520C_A:C2_06530W_A:C2_06650C_A:C2_06660W_A:RPL11:FHL1:C2_06850W_A:C2_06950C_A:RCK2:NOC4:C2_07360W_A:RCL1:PRS5:C2_07920W_A:NSA1:KRE30:RPS10:C2_08180C_A:EAF3:RRP8:C2_08530C_A:MSU1:SMC2:UTP15:MFG1:APE3:CDC47:C2_09160W_A:C2_09180W_A:C2_09290W_A:MED18:C2_09310C_A:PES1:TAZ1:RRP15:C2_09660W_A:SMM1:TIM23:C2_09920W_A:CWC22:GPD1:PUS7:C2_10740C_A:C2_10810W_A:RPS24:C3_00100W_A:ULP3:UTP8:BUD21:SOF1:C3_00660W_A:C3_00830C_A:BMS1:ARP9:UTP20:NCE103:C3_01310W_A:RPS7A:C3_01560W_A:SCM3:C3_02020W_A:C3_02040C_A:UTP4:ILV2:C3_02350W_A:DDC1:C3_02670W_A:SMC3:C3_02840W_A:C3_02850C_A:C3_03070W_A:C3_03110W_A:C3_03330C_A:YAH1:C3_03470W_A:HBR3:C3_04370C_A:C3_04380C_A:MAK21:RPS15:ARV1:SFP1:NOP14:CEM1:C3_05160C_A:WOR2:RPL8B:C3_05280C_A:C3_05380W_A:C3_05440C_A:QDR2:SAM50:C3_05800W_A:C3_05860C_A:C3_05900W_A:NOG1:C3_06150W_A:DOT1:ISW2:C3_06370C_A:NSA2:C3_06600C_A:C3_06630W_A:PRP5:NOP13:C3_07550C_A:C3_07570C_A:RAD4:UTP9:C3_07800C_A:DUR4:RLP24:NMD5:C4_00690C_A:C4_00700C_A:C4_00740W_A:MLH1:C4_00800W_A:C4_00810C_A:C4_00880W_A:RAT1:C4_0113 |
|-------|-----------------------------------------------|------------------------------|------------------------------------------|----------|-------|---------------------------------------------------------------------------------------------------------------------------------------------------------------------------------------------------------------------------------------------------------------------------------------------------------------------------------------------------------------------------------------------------------------------------------------------------------------------------------------------------------------------------------------------------------------------------------------------------------------------------------------------------------------------------------------------------------------------------------------------------------------------------------------------------------------------------------------------------------------------------------------------------------------------------------------------------------------------------------------------------------------------------------------------------------------------------------------------------------------------------------------------------------------------------------------------------------------------------------------------------------------------------------------------------------------------------------------------------------------------------------------------------------------------------------------------------------------------------------------------------------------------------------------------------------------------------------------------------------------------------------------------------------------------------------------------------------------------------------------------------------------------------------------------------------------------------------------------------------------------------------------------------------------------------------------------------------------------------------------------------------------------------------------------------------------------------------------------------------------------------------------------------------------------------------------------------------------------------------------------------------------------------------------------------------------------------------------------------------------------------------------------------------------------------------------------------------------------------------------------------------------------------------------------------------------------------------------------------------------------------------------------------------------|

|  |  |  |  |  |  |                                                                                                                                                                                                                                                                                                                                                                                                                                                                                                                                                                                                                                                                                                                                                                                                                                                                                                                                                                                                                                                                                                                                                                                                                                                                                                                                                                                                                                                                                                                                                                                                                                                                                                                                                                                                                                                                                                                                                                                                                                                                                                                                                                                                                                                                                                                                                                                              |
|--|--|--|--|--|--|----------------------------------------------------------------------------------------------------------------------------------------------------------------------------------------------------------------------------------------------------------------------------------------------------------------------------------------------------------------------------------------------------------------------------------------------------------------------------------------------------------------------------------------------------------------------------------------------------------------------------------------------------------------------------------------------------------------------------------------------------------------------------------------------------------------------------------------------------------------------------------------------------------------------------------------------------------------------------------------------------------------------------------------------------------------------------------------------------------------------------------------------------------------------------------------------------------------------------------------------------------------------------------------------------------------------------------------------------------------------------------------------------------------------------------------------------------------------------------------------------------------------------------------------------------------------------------------------------------------------------------------------------------------------------------------------------------------------------------------------------------------------------------------------------------------------------------------------------------------------------------------------------------------------------------------------------------------------------------------------------------------------------------------------------------------------------------------------------------------------------------------------------------------------------------------------------------------------------------------------------------------------------------------------------------------------------------------------------------------------------------------------|
|  |  |  |  |  |  | OC_A:C4_01280C_A:PWP1:C4_01500W_A:C4_01560C_A:TOA2:TIM10:C4_02400C_A:SLX4:C4_02720C_A:HIT1:C4_02770C_A:SAS10:RPC53:HCA4:ZUO1:C4_02880C_A:NAN1:C4_03140C_A:C4_03170W_A:DAO2:C4_03720C_A:C4_03740W_A:NUP84:C4_03830W_A:RRP42:C4_03870C_A:RAM1:ECM1:C4_04130W_A:DUO1:SAP10:C4_04520W_A:SSZ1:BAS1:C4_04820C_A:AGP3:RPL30:C4_05010W_A:C4_05230C_A:C4_05260W_A:C4_05360C_A:OFD1:TUB4:C4_05650W_A:C4_06210C_A:C4_06410W_A:C4_06450W_A:NOP1:C4_06790W_A:C4_06950W_A:C4_07060W_A:C4_07140W_A:C4_07150W_A:C5_00260W_A:C5_00280C_A:MRP17:EXO1:RMT2:C5_00920W_A:BUD23:CLN3:CYC3:C5_01140C_A:PUS4:C5_01430C_A:FYV5:SPB4:C5_01930W_A:C5_02010C_A:C5_02070C_A:RIX7:PDE1:C5_02440C_A:TIF5:SPR28:UTP13:BUR2:C5_02740W_A:CKB2:C5_02780W_A:C5_03010W_A:RMS1:PCL1:C5_03400C_A:C5_03550W_A:MDJ1:C5_03920C_A:C5_03970W_A:C5_04120C_A:C5_04720C_A:HAS1:C5_04840C_A:C5_04910W_A:C5_05010W_A:GRF10:SDH4:C5_05340W_A:DNA2:NOP5:C6_00560W_A:CDC14:TOP1:C6_01040C_A:C6_01120C_A:CIC1:QDR3:TIF3:C6_01890C_A:C6_02150C_A:SWD3:C6_02230W_A:RPL10A:ALG11:C6_02290C_A:C6_02430W_A:PRP45:C6_02690C_A:MRT4:C6_02900C_A:POP4:C6_02970C_A:C6_03210C_A:ARP4:C6_03380W_A:C6_03390W_A:C6_03440W_A:NAM2:NOG2:SPB1:C6_04240W_A:NOP8:C7_00160C_A:C7_00220W_A:C7_00330C_A:DCC1:THG1:RPA135:NOP15:C7_01030C_A:DBP7:C7_01210C_A:C7_01270C_A:C7_01360C_A:C7_01400C_A:GIR2:FLU1:C7_01570C_A:C7_01600W_A:C7_01950W_A:LIG1:C7_02460C_A:C7_02660C_A:C7_02930C_A:C7_03400C_A:ISY1:ENP2:C7_03590C_A:ENP1:C7_03850W_A:C7_03880C_A:MAM33:C7_04150W_A:UTP18:RTT109:CR_00430C_A:CR_00460C_A:BUD22:PWP2:CR_00830W_A:DAL81:CTF18:CR_01320C_A:CR_01410C_A:CR_01550C_A:CR_01600C_A:CR_01670W_A:CR_01700C_A:CR_01710W_A:CR_01780W_A:CR_02030C_A:MCM6:CR_02420W_A:CR_02550C_A:RRP9:CR_02890C_A:SRP40:ARC1:SMC5:CR_03200C_A:CR_03230W_A:CR_03340C_A:CR_03360W_A:KTI12:NCS2:YVH1:SGD1:SMC1:PRP42:CR_03760W_A:CR_03940W_A:MEX67:CR_04110W_A:CR_04170W_A:QDR1:CR_04240C_A:CR_04500C_A:CR_04560C_A:CR_04710W_A:CR_04920W_A:BIR1:NOC2:CR_05550C_A:RNR3:MTG2:DBP8:SDA1:RFX1:RPL7:CR_06230W_A:FGR50:CR_06450W_A:RRN11:HSP60:CR_06680C_A:NMD3:CR_06740W_A:CR_06840W_A:CR_06970C_A:POL2:CR_07030C_A:CR_07310W_A:PIF1:FUN30:CR_07640C_A:CDC45:DBP6:ASF1:IMP4:CR_08000C_A:NOP10:SSB1:RIO2:ATS1:CR_08330W_A:CR_08410W_A:TSR1:CR_08500W_A:MPS1:ELF1:SSF1:CR_09740W_A:MED21:CR_09800C_A:DPB2:SIK1:CR_10180W_A:UTP5:CR_10260W_A:CR_10410C_A:CR_10470C_A:MCD1:DRS1:LTV1:POP3 |
|--|--|--|--|--|--|----------------------------------------------------------------------------------------------------------------------------------------------------------------------------------------------------------------------------------------------------------------------------------------------------------------------------------------------------------------------------------------------------------------------------------------------------------------------------------------------------------------------------------------------------------------------------------------------------------------------------------------------------------------------------------------------------------------------------------------------------------------------------------------------------------------------------------------------------------------------------------------------------------------------------------------------------------------------------------------------------------------------------------------------------------------------------------------------------------------------------------------------------------------------------------------------------------------------------------------------------------------------------------------------------------------------------------------------------------------------------------------------------------------------------------------------------------------------------------------------------------------------------------------------------------------------------------------------------------------------------------------------------------------------------------------------------------------------------------------------------------------------------------------------------------------------------------------------------------------------------------------------------------------------------------------------------------------------------------------------------------------------------------------------------------------------------------------------------------------------------------------------------------------------------------------------------------------------------------------------------------------------------------------------------------------------------------------------------------------------------------------------|

|       |                              |                              |                                        |          |       |                                                                                                                                                                                                                                                                                                                                                                                                                                                                                                                                                                                                                                                                                                                                                                                                                                                                                                                                                                                                |
|-------|------------------------------|------------------------------|----------------------------------------|----------|-------|------------------------------------------------------------------------------------------------------------------------------------------------------------------------------------------------------------------------------------------------------------------------------------------------------------------------------------------------------------------------------------------------------------------------------------------------------------------------------------------------------------------------------------------------------------------------------------------------------------------------------------------------------------------------------------------------------------------------------------------------------------------------------------------------------------------------------------------------------------------------------------------------------------------------------------------------------------------------------------------------|
| 22618 | protein-RNA complex assembly | 110 out of 1061 genes, 10.4% | 193 out of 6473 background genes, 3.0% | 8.24E-36 | 0.00% | C1_02900C_A:C1_04040C_A:C1_04120C_A:ERB1:NOP4:C1_04710C_A:C1_04970W_A:RRP6:C1_05360C_A:RPS27A:C1_06760C_A:ERD1:FUN12:JIP5:C1_09040C_A:CEF1:C1_09710C_A:RPA190:C1_10970W_A:TRP3:CSI2:C1_12440W_A:C1_12750C_A:C1_12760W_A:C1_14080W_A:C2_00200W_A:C2_00280C_A:C2_01070W_A:PRP39:UTP22:C2_02540W_A:PRP3:SNU114:MAK5:C2_05160C_A:RPF2:C2_05750W_A:C2_05830C_A:C2_06650C_A:RPL11:C2_09180W_A:C2_10740C_A:C3_00100W_A:C3_00660W_A:BMS1:ARP9:C3_01560W_A:C3_02020W_A:C3_02040C_A:C3_02350W_A:C3_02670W_A:SMC3:C3_03330C_A:C3_04370C_A:MAK21:ARV1:C3_05160C_A:QDR2:NOG1:C3_06370C_A:PRP5:RLP24:HIT1:C4_05010W_A:C4_05230C_A:C4_06410W_A:RMT2:SPB4:C5_01930W_A:C5_02010C_A:C5_02070C_A:TIF5:C5_04720C_A:HAS1:C5_05340W_A:CIC1:TIF3:C6_02230W_A:PRP45:SPB1:RPA135:DBP7:FLU1:C7_03400C_A:ISY1:ENP2:UTP18:BUD22:PWP2:CR_00830W_A:CR_01410C_A:CR_01550C_A:CR_01700C_A:ARC1:YVH1:SGD1:CR_03940W_A:CR_04110W_A:CR_04170W_A:NOC2:CR_05550C_A:SDA1:CR_06680C_A:TSR1:ELF1:SSF1:CR_09800C_A:CR_10470C_A:DRS1:LTV1 |
|-------|------------------------------|------------------------------|----------------------------------------|----------|-------|------------------------------------------------------------------------------------------------------------------------------------------------------------------------------------------------------------------------------------------------------------------------------------------------------------------------------------------------------------------------------------------------------------------------------------------------------------------------------------------------------------------------------------------------------------------------------------------------------------------------------------------------------------------------------------------------------------------------------------------------------------------------------------------------------------------------------------------------------------------------------------------------------------------------------------------------------------------------------------------------|

|       |                                  |                              |                                          |          |       |                                                                                                                                                                                                                                                                                                                                                                                                                                                                                                                                                                                                                                                                                                                                                                                                                                                                                                                                                                                                                                                                                                                                                                                                                                                                                                                                                                                                                                                                                                                                                                                                                                                                                                                                                                                                                                                                                                                                                                                                                                                                                                                                                                                                                                                                                                                                                                                                                                                                                                                                                                                                                                                              |
|-------|----------------------------------|------------------------------|------------------------------------------|----------|-------|--------------------------------------------------------------------------------------------------------------------------------------------------------------------------------------------------------------------------------------------------------------------------------------------------------------------------------------------------------------------------------------------------------------------------------------------------------------------------------------------------------------------------------------------------------------------------------------------------------------------------------------------------------------------------------------------------------------------------------------------------------------------------------------------------------------------------------------------------------------------------------------------------------------------------------------------------------------------------------------------------------------------------------------------------------------------------------------------------------------------------------------------------------------------------------------------------------------------------------------------------------------------------------------------------------------------------------------------------------------------------------------------------------------------------------------------------------------------------------------------------------------------------------------------------------------------------------------------------------------------------------------------------------------------------------------------------------------------------------------------------------------------------------------------------------------------------------------------------------------------------------------------------------------------------------------------------------------------------------------------------------------------------------------------------------------------------------------------------------------------------------------------------------------------------------------------------------------------------------------------------------------------------------------------------------------------------------------------------------------------------------------------------------------------------------------------------------------------------------------------------------------------------------------------------------------------------------------------------------------------------------------------------------------|
| 43170 | macromolecular metabolic process | 716 out of 1061 genes, 67.5% | 3194 out of 6473 background genes, 49.3% | 1.05E-35 | 0.00% | RIM8:LEU4:HBR1:CNS1:RPO41:NRM1:RRS1:TRI1:NMA111:HMT1:C1_01150C_A:C1_01160C_A:TRM2:ABC1:C1_01530C_A:C1_02090C_A:ABP140:CWH8:C1_02380C_A:C1_02390W_A:C1_02450C_A:HOM6:PDE2:MIA40:C1_02900C_A:TSR2:C1_03260W_A:C1_03370W_A:C1_03540C_A:C1_03630W_A:C1_03790C_A:RPP1:C1_03830C_A:KTR4:C1_04040C_A:C1_04120C_A:ERB1:RPN4:NOP4:C1_04510W_A:C1_04530C_A:C1_04710C_A:MRPL37:C1_04970W_A:RHD1:RRP6:REI1:TRY2:C1_05220C_A:C1_05270C_A:C1_05360C_A:C1_05380C_A:RSM22:RPS27A:C1_05630C_A:FAL1:C1_05650W_A:RAD10:C1_06530C_A:C1_06540C_A:NOP6:C1_06760C_A:RIA1:C1_07340W_A:C1_07470C_A:LHP1:C1_07510W_A:C1_07660W_A:ECO1:C1_07850C_A:GCS1:MRPL3:ERD1:C1_07950C_A:C1_07960W_A:FUN12:DRG1:CAT8:MLT1:DIP2:GCR3:C1_08520C_A:GCD6:C1_08630W_A:MSS116:C1_08890C_A:C1_09040C_A:CEF1:C1_09390W_A:C1_09610W_A:C1_09710C_A:C1_09790C_A:C1_09840C_A:BUD31:C1_09910C_A:PDC2:DBP3:MNN23:C1_10080W_A:C1_10200C_A:C1_10340W_A:FCY23:C1_10620W_A:APN2:RPA190:C1_10690W_A:C1_10920W_A:C1_10950C_A:C1_10970W_A:C1_11000C_A:PET127:FGR39:NEP1:KRR1:SAM2:GAR1:MUP1:C1_11880W_A:C1_11900C_A:C1_11910W_A:SER33:TRP3:C1_12280C_A:CSI2:MRPS9:C1_12350W_A:WRS1:C1_12440W_A:C1_12570C_A:C1_12630C_A:C1_12640W_A:C1_12670C_A:C1_12750C_A:C1_12760W_A:FEN1:C1_12820C_A:RPL14:C1_13060C_A:REX3:RMP1:C1_13380W_A:KNS1:MCU1:C1_13560W_A:C1_13820C_A:YBP1:C1_14080W_A:C1_14160W_A:C1_14330W_A:MPP10:FAV3:C2_00200W_A:C2_00280C_A:C2_00390C_A:C2_00410C_A:C2_00620C_A:C2_00820W_A:C2_00840W_A:MXR1:C2_01060C_A:C2_01070W_A:C2_01220W_A:C2_01240C_A:ESC4:CLB2:C2_01420C_A:REX2:C2_01740C_A:C2_01820C_A:PRP39:C2_01860C_A:C2_01870C_A:C2_02120W_A:SAM37:C2_02270C_A:C2_02420C_A:UTP21:UTP22:C2_02490C_A:PRS1:C2_02540W_A:C2_02630W_A:PDR17:C2_02930C_A:MET1:SMP3:C2_03130W_A:PRP3:C2_03560C_A:MNN42:C2_03700W_A:C2_03830W_A:GPI13:SCH9:C2_03950W_A:C2_04120C_A:TBF1:BAT21:SUV3:RIM2:MED8:C2_04570W_A:SNU114:C2_04700C_A:C2_04820W_A:PZF1:CKA2:C2_04990W_A:C2_05050C_A:C2_05080C_A:MAK5:C2_05160C_A:CDC21:SGO1:RPF2:C2_05270W_A:RPC40:KTI11:C2_05670C_A:C2_05750W_A:C2_05830C_A:C2_05840W_A:IDP1:LAS1:CSM3:ECM17:SER1:MAK16:C2_06480W_A:C2_06520C_A:C2_06530W_A:VAS1:C2_06650C_A:C2_06660W_A:RPL11:FHL1:C2_06850W_A:C2_06950C_A:SPE3:RCK2:C2_07270W_A:NOC4:C2_07360W_A:RCL1:C2_07680W_A:PHO86:C2_07860W_A:PRS5:C2_07920W_A:NSA1:C2_08180C_A:C2_08200W_A:EAF3:RRP8:C2_08530C_A:MSU1:UTP15:MFG1:APE3:CDC47:C2_09160W_A:C2_09180W_A:MED18:C2_09310C_A:PES1:TAZ1:RRP15:C2_09500W_A:C2_09660W_A:SMM1:C2_09920W_A:CWC22:UBP8:PUS7:HEM3:C2_10740C_A:RPC11:C2_10810W_A:RPS24:C3_00100W_A:ULP3:UTP8:BUD21:SOF1:C3_00660W_A:C3_00830C_A:BMS1:ARP9:UTP20:NCE103:C3_01310W_A:MET18:RPS7A:C3_01520C_A:C3_01560W_A:PPT1:SCM |
|-------|----------------------------------|------------------------------|------------------------------------------|----------|-------|--------------------------------------------------------------------------------------------------------------------------------------------------------------------------------------------------------------------------------------------------------------------------------------------------------------------------------------------------------------------------------------------------------------------------------------------------------------------------------------------------------------------------------------------------------------------------------------------------------------------------------------------------------------------------------------------------------------------------------------------------------------------------------------------------------------------------------------------------------------------------------------------------------------------------------------------------------------------------------------------------------------------------------------------------------------------------------------------------------------------------------------------------------------------------------------------------------------------------------------------------------------------------------------------------------------------------------------------------------------------------------------------------------------------------------------------------------------------------------------------------------------------------------------------------------------------------------------------------------------------------------------------------------------------------------------------------------------------------------------------------------------------------------------------------------------------------------------------------------------------------------------------------------------------------------------------------------------------------------------------------------------------------------------------------------------------------------------------------------------------------------------------------------------------------------------------------------------------------------------------------------------------------------------------------------------------------------------------------------------------------------------------------------------------------------------------------------------------------------------------------------------------------------------------------------------------------------------------------------------------------------------------------------------|



|  |  |  |  |  |  |                                                                                                                                                                                                                                                                                                                                                                                                                                                                                                                                                                                                                                                                                                                                                                                                                                                                                                                                                                                                                                                                                                                                                                                                                                                                                                                                                                                                                                                                                                                                                                                                                                                                                                                                                                                                                                                                                                                                                                                                                                                                                                                                                                                                                                                                                                                                                                                                                                                                                                                                                                                                                              |
|--|--|--|--|--|--|------------------------------------------------------------------------------------------------------------------------------------------------------------------------------------------------------------------------------------------------------------------------------------------------------------------------------------------------------------------------------------------------------------------------------------------------------------------------------------------------------------------------------------------------------------------------------------------------------------------------------------------------------------------------------------------------------------------------------------------------------------------------------------------------------------------------------------------------------------------------------------------------------------------------------------------------------------------------------------------------------------------------------------------------------------------------------------------------------------------------------------------------------------------------------------------------------------------------------------------------------------------------------------------------------------------------------------------------------------------------------------------------------------------------------------------------------------------------------------------------------------------------------------------------------------------------------------------------------------------------------------------------------------------------------------------------------------------------------------------------------------------------------------------------------------------------------------------------------------------------------------------------------------------------------------------------------------------------------------------------------------------------------------------------------------------------------------------------------------------------------------------------------------------------------------------------------------------------------------------------------------------------------------------------------------------------------------------------------------------------------------------------------------------------------------------------------------------------------------------------------------------------------------------------------------------------------------------------------------------------------|
|  |  |  |  |  |  | 3:C3_02020W_A:C3_02040C_A:UTP4:C3_02180C_A:ILV2:C3_02350W_A:DDC1:C3_02670W_A:SMC3:C3_02750W_A:C3_02840W_A:C3_02850C_A:C3_03070W_A:C3_03110W_A:C3_03330C_A:ULP1:C3_03560W_A:HBR3:RAD53:C3_04370C_A:C3_04380C_A:MAK21:RPS15:RPP2B:ARV1:SFP1:NOP14:CEM1:C3_05140C_A:C3_05160C_A:WOR2:RPL8B:C3_05280C_A:C3_05380W_A:GPI1:C3_05440C_A:C3_05510W_A:QDR2:C3_05800W_A:C3_05860C_A:TRM12:C3_05900W_A:CTA4:NOG1:C3_06150W_A:MMS21:CYM1:C3_06240C_A:C3_06270C_A:DOT1:ISW2:C3_06370C_A:NSA2:C3_06600C_A:FUN31:C3_06630W_A:PRP5:C3_06830C_A:RPS12:NOP13:C3_07400W_A:C3_07550C_A:C3_07570C_A:RIT1:RAD4:UTP9:C3_07800C_A:DUR4:RLP24:NMD5:HIS5:C4_00690C_A:C4_00700C_A:C4_00740W_A:MLH1:C4_00800W_A:C4_00810C_A:C4_00880W_A:ARO1:C4_00940W_A:PTC8:RAT1:C4_01280C_A:PGA53:PWP1:C4_01470W_A:NIP1:C4_01500W_A:C4_01560C_A:TOA2:HSX11:TIM10:ZCF25:C4_02400C_A:SLX4:HIT1:C4_02770C_A:SAS10:RPC53:HCA4:C4_02850W_A:ZUO1:C4_02880C_A:NAN1:C4_03140C_A:C4_03170W_A:DAO2:C4_03410W_A:RAD2:C4_03720C_A:C4_03730C_A:C4_03740W_A:NUP84:C4_03830W_A:RRP42:C4_03870C_A:RAM1:FGR28:ECM1:C4_04130W_A:DUO1:C4_04390W_A:SAP10:C4_04520W_A:SSZ1:BAS1:C4_04810C_A:AGP3:RPL30:C4_05230C_A:C4_05260W_A:C4_05360C_A:OFD1:C4_05650W_A:C4_05890W_A:C4_06210C_A:C4_06410W_A:NOP1:C4_06790W_A:C4_06950W_A:C4_07060W_A:C4_07140W_A:C4_07150W_A:C5_00030W_A:C5_00280C_A:DUS4:C5_00320W_A:MRP17:MET14:EXO1:RMT2:C5_00820W_A:C5_00920W_A:BU23:CYC3:C5_01140C_A:PUS4:C5_01430C_A:FYV5:SPB4:C5_01610W_A:CCN1:C5_01700W_A:C5_01930W_A:C5_02010C_A:C5_02070C_A:RIX7:C5_02440C_A:TIF5:SPR28:UTP13:C5_02590C_A:BUR2:C5_02740W_A:CKB2:MSW1:C5_02780W_A:C5_02820C_A:C5_03010W_A:RMS1:CAM1-1:C5_03290C_A:PCL1:RPO26:FUR1:C5_03400C_A:C5_03460C_A:C5_03530C_A:C5_03550W_A:MDJ1:C5_03640W_A:C5_03700C_A:C5_03920C_A:C5_03970W_A:C5_04120C_A:C5_04290C_A:C5_04340W_A:CSU57:MSM1:HYS2:HAS1:C5_04840C_A:C5_04910W_A:GRF10:C5_05250C_A:SDH4:C5_05340W_A:DNA2:NOP5:C6_00530C_A:C6_00560W_A:C6_00640C_A:CDC14:C6_00760W_A:TOP1:C6_01040C_A:CIP1:C6_01120C_A:CIC1:PMP1:TIF3:RAD18:HCH1:C6_01890C_A:C6_01980C_A:SWD3:C6_02230W_A:RPL10A:ALG11:C6_02280W_A:C6_02290C_A:C6_02300C_A:C6_02350C_A:C6_02370C_A:C6_02430W_A:PRP45:C6_02690C_A:MRT4:C6_02900C_A:POP4:C6_03210C_A:BMT4:ARP4:C6_03380W_A:C6_03390W_A:C6_03440W_A:NAM2:SPB1:C6_04240W_A:NOP8:ILS1:C6_04530C_A:C7_00160C_A:C7_00220W_A:C7_00330C_A:DC1:PSF3:THG1:RPA135:NOP15:YML6:C7_01020C_A:C7_01030C_A:DBP7:C7_01210C_A:ASC1:C7_01270C_A:PSF1:C7_01360C_A:C7_01400C_A:GIR2:PRT1:FLU1:C7_01570C_A:SMC6:C7_01600W_A:C7_01950W_A:LIG1:C7_02340C_A:C7_02460C_A:C7_02660C_A:C7_02930C_A:IFM1:C7_03400C_A:ISY1:ENP2:C7_03590C_A:ENP1:HIS7:M |
|--|--|--|--|--|--|------------------------------------------------------------------------------------------------------------------------------------------------------------------------------------------------------------------------------------------------------------------------------------------------------------------------------------------------------------------------------------------------------------------------------------------------------------------------------------------------------------------------------------------------------------------------------------------------------------------------------------------------------------------------------------------------------------------------------------------------------------------------------------------------------------------------------------------------------------------------------------------------------------------------------------------------------------------------------------------------------------------------------------------------------------------------------------------------------------------------------------------------------------------------------------------------------------------------------------------------------------------------------------------------------------------------------------------------------------------------------------------------------------------------------------------------------------------------------------------------------------------------------------------------------------------------------------------------------------------------------------------------------------------------------------------------------------------------------------------------------------------------------------------------------------------------------------------------------------------------------------------------------------------------------------------------------------------------------------------------------------------------------------------------------------------------------------------------------------------------------------------------------------------------------------------------------------------------------------------------------------------------------------------------------------------------------------------------------------------------------------------------------------------------------------------------------------------------------------------------------------------------------------------------------------------------------------------------------------------------------|

|  |  |  |  |  |  |                                                                                                                                                                                                                                                                                                                                                                                                                                                                                                                                                                                                                                                                                                                                                                                                                                                                                                                                                                                                                                                                                                                                                                    |
|--|--|--|--|--|--|--------------------------------------------------------------------------------------------------------------------------------------------------------------------------------------------------------------------------------------------------------------------------------------------------------------------------------------------------------------------------------------------------------------------------------------------------------------------------------------------------------------------------------------------------------------------------------------------------------------------------------------------------------------------------------------------------------------------------------------------------------------------------------------------------------------------------------------------------------------------------------------------------------------------------------------------------------------------------------------------------------------------------------------------------------------------------------------------------------------------------------------------------------------------|
|  |  |  |  |  |  | RP7:C7_03850W_A:C7_03880C_A:C7_04150W_A:UTP18:MMS22:RTT109:CR_00430C_A:CR_00460C_A:MRPL6:ADE1:BUD22:PWP2:CR_00830W_A:TRM1:DAL81:CTF18:CR_01260W_A:CR_01320C_A:CR_01410C_A:PRS:CR_01550C_A:CR_01600C_A:CR_01670W_A:CR_01700C_A:CR_01710W_A:CR_01780W_A:CR_01950W_A:CR_02030C_A:MCM6:ERG25:CR_02420W_A:CR_02430C_A:CR_02550C_A:RRP9:RPC31:CR_02890C_A:SRP40:ARC1:SMC5:CR_03110W_A:CR_03200C_A:CR_03230W_A:CR_03340C_A:CR_03360W_A:KTI12:MTG1:CR_03400W_A:CR_03440W_A:NCS2:YVH1:SGD1:SMC1:PRP42:CR_03760W_A:CR_03940W_A:MEX67:CR_04110W_A:CR_04160C_A:CR_04170W_A:CR_04240C_A:CR_04300W_A:CR_04500C_A:CR_04560C_A:CR_04710W_A:RPB8:CR_04920W_A:NOC2:CR_05550C_A:RNR3:MTG2:DBP8:RFX1:RPL7:CR_06230W_A:FGR50:CR_06450W_A:RRN11:HSP60:CR_06680C_A:NMD3:CR_06840W_A:ATX1:CR_06970C_A:CR_06980W_A:POL2:CR_07030C_A:URA2:CR_07310W_A:PIF1:CR_07480W_A:FUN30:CR_07640C_A:CR_07640C_A:CDC45:DBP6:ASF1:IMP4:CR_08000C_A:CR_08000C_A:NOP10:SSB1:RIO2:ATS1:CR_08330W_A:RPP2A:GSH2:CR_08410W_A:TSR1:CR_08940W_A:MPS1:CR_09310W_A:ELF1:SSF1:CR_09740W_A:MED21:CR_09800C_A:DPB2:SIK1:CR_09990W_A:CR_10180W_A:UTP5:CR_10260W_A:CR_10410C_A:CR_10470C_A:MCD1:DRS1:YHB4:PRO1:LTV1:POP3 |
|--|--|--|--|--|--|--------------------------------------------------------------------------------------------------------------------------------------------------------------------------------------------------------------------------------------------------------------------------------------------------------------------------------------------------------------------------------------------------------------------------------------------------------------------------------------------------------------------------------------------------------------------------------------------------------------------------------------------------------------------------------------------------------------------------------------------------------------------------------------------------------------------------------------------------------------------------------------------------------------------------------------------------------------------------------------------------------------------------------------------------------------------------------------------------------------------------------------------------------------------|

|    |                                  |                            |                                        |          |       |                                                                                                                                                                                                                                                                                                                                                                                                                                                                                                                                                                                                                                                                                     |
|----|----------------------------------|----------------------------|----------------------------------------|----------|-------|-------------------------------------------------------------------------------------------------------------------------------------------------------------------------------------------------------------------------------------------------------------------------------------------------------------------------------------------------------------------------------------------------------------------------------------------------------------------------------------------------------------------------------------------------------------------------------------------------------------------------------------------------------------------------------------|
| 27 | ribosomal large subunit assembly | 77 out of 1061 genes, 7.3% | 105 out of 6473 background genes, 1.6% | 1.25E-35 | 0.00% | C1_04040C_A:ERB1:NOP4:C1_04710C_A:C1_04970W_A:RRP6:C1_05360C_A:C1_06760C_A:ERD1:JIP5:C1_09040C_A:C1_09710C_A:RPA190:C1_10970W_A:TRP3:CSI2:C1_12440W_A:C1_12760W_A:C1_14080W_A:C2_01070W_A:UTP22:C2_02540W_A:MAK5:C2_05160C_A:RPF2:C2_05750W_A:RPL11:C2_09180W_A:C2_10740C_A:BMS1:ARP9:C3_01560W_A:C3_02040C_A:C3_02350W_A:C3_02670W_A:SMC3:C3_04370C_A:MAK21:ARV1:C3_05160C_A:QDR2:C3_06370C_A:C4_05010W_A:C4_05230C_A:RMT2:SPB4:C5_04720C_A:HAS1:C5_05340W_A:CIC1:C6_02230W_A:SPB1:RPA135:DBP7:FLU1:C7_03400C_A:ENP2:UTP18:BUD22:PWP2:CR_01410C_A:CR_01550C_A:YVH1:SGD1:CR_03940W_A:CR_04170W_A:NOC2:CR_05550C_A:SDA1:CR_06680C_A:TSR1:ELF1:SSF1:CR_09800C_A:CR_10470C_A:DRS1:LTV1 |
|----|----------------------------------|----------------------------|----------------------------------------|----------|-------|-------------------------------------------------------------------------------------------------------------------------------------------------------------------------------------------------------------------------------------------------------------------------------------------------------------------------------------------------------------------------------------------------------------------------------------------------------------------------------------------------------------------------------------------------------------------------------------------------------------------------------------------------------------------------------------|

|           |                      |                                     |                                                     |          |       |                                                                                                                                                                                                                                                                                                                                                                                                                                                                                                                                                                                                                                                                                                                                                                                             |
|-----------|----------------------|-------------------------------------|-----------------------------------------------------|----------|-------|---------------------------------------------------------------------------------------------------------------------------------------------------------------------------------------------------------------------------------------------------------------------------------------------------------------------------------------------------------------------------------------------------------------------------------------------------------------------------------------------------------------------------------------------------------------------------------------------------------------------------------------------------------------------------------------------------------------------------------------------------------------------------------------------|
| 4225<br>5 | ribosome<br>assembly | 85 out of<br>1061<br>genes,<br>8.0% | 125 out of<br>6473<br>backgroun<br>d genes,<br>1.9% | 1.84E-35 | 0.00% | RRS1:C1_04040C_A:ERB1:NOP4:C1_04710C_A:C1_04970W_A:RRP6:C1_05360C_A:<br>RPS27A:C1_06760C_A:RIA1:ERD1:FUN12:JIP5:C1_09040C_A:C1_09710C_A:RPA190:<br>C1_10970W_A:TRP3:CSI2:C1_12440W_A:C1_12760W_A:C1_14080W_A:C2_01070<br>W_A:UTP22:C2_02540W_A:MAK5:C2_05160C_A:RPF2:C2_05750W_A:RPL11:C2_09<br>180W_A:C2_10740C_A:BMS1:ARP9:C3_01560W_A:C3_02020W_A:C3_02040C_A:C<br>3_02350W_A:C3_02670W_A:SMC3:C3_04370C_A:MAK21:ARV1:C3_05160C_A:QDR<br>2:C3_06370C_A:C4_02880C_A:C4_05010W_A:C4_05230C_A:RMT2:SPB4:C5_02070<br>C_A:TIF5:C5_04720C_A:HAS1:C5_05340W_A:CIC1:C6_02230W_A:SPB1:RPA135:DB<br>P7:FLU1:C7_03400C_A:ENP2:UTP18:BUD22:PWP2:CR_01410C_A:CR_01550C_A:YV<br>H1:SGD1:CR_03940W_A:CR_04170W_A:NOC2:CR_05550C_A:SDA1:CR_06680C_A:T<br>SR1:ELF1:SSF1:CR_09800C_A:CR_10470C_A:DRS1:LTV1 |
|-----------|----------------------|-------------------------------------|-----------------------------------------------------|----------|-------|---------------------------------------------------------------------------------------------------------------------------------------------------------------------------------------------------------------------------------------------------------------------------------------------------------------------------------------------------------------------------------------------------------------------------------------------------------------------------------------------------------------------------------------------------------------------------------------------------------------------------------------------------------------------------------------------------------------------------------------------------------------------------------------------|

|       |                           |                              |                                          |          |       |                                                                                                                                                                                                                                                                                                                                                                                                                                                                                                                                                                                                                                                                                                                                                                                                                                                                                                                                                                                                                                                                                                                                                                                                                                                                                                                                                                                                                                                                                                                                                                                                                                                                                                                                                                                                                                                                                                                                                                                                                                                                                                                                                                                                                                                                                                                                                                                                                                                                                                                                                                                                                                                                       |
|-------|---------------------------|------------------------------|------------------------------------------|----------|-------|-----------------------------------------------------------------------------------------------------------------------------------------------------------------------------------------------------------------------------------------------------------------------------------------------------------------------------------------------------------------------------------------------------------------------------------------------------------------------------------------------------------------------------------------------------------------------------------------------------------------------------------------------------------------------------------------------------------------------------------------------------------------------------------------------------------------------------------------------------------------------------------------------------------------------------------------------------------------------------------------------------------------------------------------------------------------------------------------------------------------------------------------------------------------------------------------------------------------------------------------------------------------------------------------------------------------------------------------------------------------------------------------------------------------------------------------------------------------------------------------------------------------------------------------------------------------------------------------------------------------------------------------------------------------------------------------------------------------------------------------------------------------------------------------------------------------------------------------------------------------------------------------------------------------------------------------------------------------------------------------------------------------------------------------------------------------------------------------------------------------------------------------------------------------------------------------------------------------------------------------------------------------------------------------------------------------------------------------------------------------------------------------------------------------------------------------------------------------------------------------------------------------------------------------------------------------------------------------------------------------------------------------------------------------------|
| 44238 | primary metabolic process | 781 out of 1061 genes, 73.6% | 3618 out of 6473 background genes, 55.9% | 1.84E-35 | 0.00% | RIM8:LEU4:HBR1:CNS1:RPO41:NRM1:RRS1:TRI1:NMA111:HMT1:C1_01150C_A:C1_01160C_A:TRM2:ABC1:C1_01530C_A:CYS4:C1_02090C_A:ABP140:CWH8:C1_02380C_A:C1_02390W_A:C1_02450C_A:SNZ1:HOM6:LYS2:PDE2:MIA40:C1_02900C_A:TSR2:C1_03260W_A:C1_03370W_A:C1_03540C_A:C1_03630W_A:C1_03790C_A:RPP1:C1_03830C_A:KTR4:C1_04040C_A:C1_04120C_A:ERB1:RPN4:NOP4:C1_04510W_A:C1_04530C_A:C1_04710C_A:MRPL37:C1_04970W_A:RHD1:ARG2:RRP6:REI1:TRY2:ARO4:C1_05220C_A:C1_05270C_A:C1_05360C_A:C1_05380C_A:RSM22:RPS27A:C1_05630C_A:FAL1:C1_05650W_A:RAD10:C1_06530C_A:C1_06540C_A:NOP6:C1_06760C_A:RIA1:C1_07340W_A:C1_07470C_A:LHP1:C1_07510W_A:C1_07660W_A:ADE4:ECO1:C1_07850C_A:GCS1:ADE5,7:MRPL3:ERD1:C1_07950C_A:C1_07960W_A:FUN12:DRG1:CAT8:MLT1:DIP2:SAM4:GCR3:UPC2:C1_08520C_A:GCD6:C1_08630W_A:MS5116:C1_08890C_A:C1_09040C_A:CEF1:C1_09390W_A:GUA1:C1_09610W_A:C1_09710C_A:C1_09790C_A:C1_09840C_A:BUD31:C1_09910C_A:PDC2:DBP3:MNN23:C1_10080W_A:C1_10200C_A:C1_10340W_A:FCY23:C1_10620W_A:APN2:RPA190:C1_10690W_A:C1_10920W_A:C1_10950C_A:C1_10970W_A:C1_11000C_A:PET127:FGR39:NEP1:KRR1:SAM2:GAR1:C1_11610C_A:C1_11790W_A:MUP1:C1_11880W_A:C1_11900C_A:C1_11910W_A:SER33:TRP3:C1_12280C_A:CSI2:MRPS9:C1_12350W_A:WRS1:C1_12440W_A:C1_12570C_A:C1_12630C_A:C1_12640W_A:C1_12670C_A:C1_12750C_A:C1_12760W_A:FEN1:C1_12820C_A:RPL14:C1_13060C_A:REX3:RMP1:C1_13380W_A:KNS1:MCU1:C1_13560W_A:C1_13820C_A:YBP1:C1_14080W_A:C1_14160W_A:C1_14330W_A:MPP10:FAV3:C2_00200W_A:C2_00280C_A:C2_00390C_A:C2_00410C_A:C2_00620C_A:C2_00820W_A:C2_00840W_A:MXR1:C2_01060C_A:C2_01070W_A:C2_01220W_A:C2_01240C_A:ESC4:CLB2:C2_01420C_A:APT1:REX2:C2_01740C_A:C2_01820C_A:PRP39:C2_01860C_A:C2_01870C_A:ARO3:C2_02120W_A:SAM37:C2_02270C_A:C2_02420C_A:UTP21:UTP22:C2_02490C_A:PRS1:C2_02540W_A:C2_02630W_A:PDR17:SER2:C2_02930C_A:MET1:BNA31:SMP3:C2_03130W_A:PRP3:C2_03560C_A:MNN42:C2_03700W_A:C2_03830W_A:GPI13:SCH9:C2_03950W_A:C2_04120C_A:UGA1:TBF1:BAT21:C2_04340C_A:SUV3:RIM2:MED8:C2_04570W_A:SNU114:C2_04700C_A:C2_04820W_A:PZF1:CKA2:C2_04990W_A:C2_05050C_A:C2_05080C_A:MAK5:C2_05160C_A:CDC21:SGO1:RPF2:C2_05270W_A:RPC40:KTI11:C2_05670C_A:C2_05750W_A:C2_05830C_A:C2_05840W_A:IDP1:C2_05980C_A:LAS1:CSM3:ECM17:ILV1:SER1:MAK16:C2_06480W_A:C2_06520C_A:C2_06530W_A:VAS1:C2_06650C_A:C2_06660W_A:RPL11:FHL1:C2_06850W_A:C2_06950C_A:SPE3:AAH1:RCK2:C2_07270W_A:NOC4:C2_07360W_A:C2_07410W_A:RCL1:C2_07680W_A:PHO86:C2_07860W_A:PRS5:C2_07920W_A:NSA1:C2_08180C_A:C2_08200W_A:EA3:RRP8:C2_08530C_A:MSU1:UTP15:MFG1:APE3:CDC47:ASN1:C2_09160W_A:C2_09180W_A:MED18:C2_09310C_A:PES1:TAZ1:RRP15:C2_09500W_A:C2_09660W_A:LEU42:SMM1:C2_09920W_A:CWC22:UBP8:GPD1:PUS7:HEM3:C2_10740C_A:RPC11: |
|-------|---------------------------|------------------------------|------------------------------------------|----------|-------|-----------------------------------------------------------------------------------------------------------------------------------------------------------------------------------------------------------------------------------------------------------------------------------------------------------------------------------------------------------------------------------------------------------------------------------------------------------------------------------------------------------------------------------------------------------------------------------------------------------------------------------------------------------------------------------------------------------------------------------------------------------------------------------------------------------------------------------------------------------------------------------------------------------------------------------------------------------------------------------------------------------------------------------------------------------------------------------------------------------------------------------------------------------------------------------------------------------------------------------------------------------------------------------------------------------------------------------------------------------------------------------------------------------------------------------------------------------------------------------------------------------------------------------------------------------------------------------------------------------------------------------------------------------------------------------------------------------------------------------------------------------------------------------------------------------------------------------------------------------------------------------------------------------------------------------------------------------------------------------------------------------------------------------------------------------------------------------------------------------------------------------------------------------------------------------------------------------------------------------------------------------------------------------------------------------------------------------------------------------------------------------------------------------------------------------------------------------------------------------------------------------------------------------------------------------------------------------------------------------------------------------------------------------------------|

|  |  |  |  |  |  |                                                                                                                                                                                                                                                                                                                                                                                                                                                                                                                                                                                                                                                                                                                                                                                                                                                                                                                                                                                                                                                                                                                                                                                                                                                                                                                                                                                                                                                                                                                                                                                                                                                                                                                                                                                                                                                                                                                                                                                                                                                                                                                                                                                                                                                                                                                                                                                                                                                                                                                                                                                                                                                                                                                                                                                      |
|--|--|--|--|--|--|--------------------------------------------------------------------------------------------------------------------------------------------------------------------------------------------------------------------------------------------------------------------------------------------------------------------------------------------------------------------------------------------------------------------------------------------------------------------------------------------------------------------------------------------------------------------------------------------------------------------------------------------------------------------------------------------------------------------------------------------------------------------------------------------------------------------------------------------------------------------------------------------------------------------------------------------------------------------------------------------------------------------------------------------------------------------------------------------------------------------------------------------------------------------------------------------------------------------------------------------------------------------------------------------------------------------------------------------------------------------------------------------------------------------------------------------------------------------------------------------------------------------------------------------------------------------------------------------------------------------------------------------------------------------------------------------------------------------------------------------------------------------------------------------------------------------------------------------------------------------------------------------------------------------------------------------------------------------------------------------------------------------------------------------------------------------------------------------------------------------------------------------------------------------------------------------------------------------------------------------------------------------------------------------------------------------------------------------------------------------------------------------------------------------------------------------------------------------------------------------------------------------------------------------------------------------------------------------------------------------------------------------------------------------------------------------------------------------------------------------------------------------------------------|
|  |  |  |  |  |  | C2_10810W_A:RPS24:C3_00100W_A:ULP3:RHR2:UTP8:BUD21:SOF1:C3_00660W_A:<br>C3_00830C_A:BMS1:ARP9:UTP20:NCE103:C3_01310W_A:URA3:MET18:RKI1:RPS7<br>A:C3_01520C_A:C3_01560W_A:PPT1:SCM3:C3_02020W_A:C3_02040C_A:UTP4:C3<br>_02180C_A:ILV2:C3_02350W_A:PHA2:DDC1:C3_02670W_A:SMC3:C3_02750W_A:C<br>3_02840W_A:C3_02850C_A:MET13:C3_03070W_A:C3_03110W_A:C3_03330C_A:C<br>3_03470W_A:ULP1:C3_03560W_A:HBR3:RAD53:C3_04370C_A:C3_04380C_A:ADE2<br>:MAK21:RPS15:RPP2B:ARV1:SFP1:NOP14:CEM1:C3_05140C_A:C3_05160C_A:WOR2<br>:RPL8B:C3_05280C_A:C3_05380W_A:GPI1:C3_05440C_A:C3_05510W_A:QDR2:BAT<br>22:C3_05800W_A:C3_05860C_A:TRM12:C3_05900W_A:CTA4:NOG1:C3_06150W_A<br>:MMS21:CYM1:C3_06240C_A:C3_06270C_A:DOT1:ISW2:C3_06370C_A:NSA2:OPI3:<br>C3_06600C_A:FUN31:C3_06630W_A:PRP5:C3_06830C_A:RPS12:NOP13:C3_07400<br>W_A:C3_07550C_A:C3_07570C_A:RIT1:RAD4:UTP9:C3_07800C_A:HIS4:MET15:DUR<br>4:RLP24:NMD5:HIS5:C4_00690C_A:C4_00700C_A:C4_00740W_A:MLH1:C4_00800<br>W_A:C4_00810C_A:C4_00880W_A:ARO1:C4_00940W_A:PTC8:RAT1:AAT22:C4_012<br>80C_A:PGA53:ILV6:PWP1:C4_01470W_A:NIP1:C4_01500W_A:C4_01560C_A:TOA2:<br>HSX11:TIM10:ZCF25:C4_02400C_A:SLX4:HIT1:C4_02770C_A:SAS10:RPC53:HCA4:C4<br>_02850W_A:ZUO1:C4_02880C_A:NAN1:C4_03140C_A:C4_03170W_A:DAO2:C4_03<br>410W_A:RAD2:C4_03720C_A:C4_03730C_A:C4_03740W_A:NUP84:C4_03830W_A:<br>RRP42:C4_03870C_A:RAM1:FGR28:ECM1:C4_04130W_A:DUO1:C4_04390W_A:SAP<br>10:C4_04520W_A:SSZ1:BAS1:C4_04810C_A:AGP3:RPL30:C4_05230C_A:C4_05260<br>W_A:C4_05360C_A:OFD1:HOM3:C4_05650W_A:C4_05890W_A:TRP5:C4_06210C_<br>A:C4_06410W_A:NOP1:C4_06790W_A:C4_06950W_A:MET16:C4_07060W_A:TRP4:<br>C4_07140W_A:C4_07150W_A:C5_00030W_A:C5_00260W_A:C5_00280C_A:DUS4:C<br>5_00320W_A:MRP17:MET14:IFG3:EXO1:RMT2:C5_00820W_A:C5_00920W_A:BUD2<br>3:CYC3:C5_01140C_A:PUS4:C5_01430C_A:FYV5:SPB4:C5_01610W_A:CCN1:C5_017<br>00W_A:C5_01930W_A:C5_02010C_A:C5_02070C_A:RIX7:THR4:PDE1:C5_02440C_A<br>:TIF5:SPR28:UTP13:C5_02590C_A:BUR2:C5_02740W_A:CKB2:MSW1:C5_02780W_A<br>:C5_02820C_A:C5_03010W_A:RMS1:CAM1-<br>1:C5_03290C_A:PCL1:RPO26:FUR1:C5_03400C_A:C5_03460C_A:C5_03530C_A:MDJ<br>1:C5_03640W_A:C5_03700C_A:HAM1:C5_03920C_A:C5_03970W_A:C5_04120C_A:<br>SAH1:C5_04290C_A:C5_04340W_A:URA7:CSU57:MSM1:HYS2:HAS1:C5_04840C_A:<br>C5_04910W_A:C5_05000C_A:GRF10:C5_05250C_A:SDH4:HIS1:C5_05340W_A:ILV3:<br>DNA2:NOP5:C6_00530C_A:C6_00560W_A:FCA1:C6_00640C_A:CDC14:C6_00760W_<br>A:TOP1:HAL22:C6_01040C_A:CIP1:C6_01120C_A:CIC1:EBP1:C6_01300W_A:PMP1:T<br>IF3:RAD18:HCH1:C6_01890C_A:C6_01980C_A:SWD3:C6_02230W_A:RPL10A:ALG11<br>:C6_02280W_A:C6_02290C_A:C6_02300C_A:C6_02350C_A:C6_02370C_A:C6_0242<br>0W_A:C6_02430W_A:PRP45:C6_02690C_A:MRT4:C6_02900C_A:POP4:C6_03210C_<br>A:BMT4:ARP4:C6_03380W_A:C6_03390W_A:C6_03440W_A:NAM2:SPB1:C6_04240 |
|--|--|--|--|--|--|--------------------------------------------------------------------------------------------------------------------------------------------------------------------------------------------------------------------------------------------------------------------------------------------------------------------------------------------------------------------------------------------------------------------------------------------------------------------------------------------------------------------------------------------------------------------------------------------------------------------------------------------------------------------------------------------------------------------------------------------------------------------------------------------------------------------------------------------------------------------------------------------------------------------------------------------------------------------------------------------------------------------------------------------------------------------------------------------------------------------------------------------------------------------------------------------------------------------------------------------------------------------------------------------------------------------------------------------------------------------------------------------------------------------------------------------------------------------------------------------------------------------------------------------------------------------------------------------------------------------------------------------------------------------------------------------------------------------------------------------------------------------------------------------------------------------------------------------------------------------------------------------------------------------------------------------------------------------------------------------------------------------------------------------------------------------------------------------------------------------------------------------------------------------------------------------------------------------------------------------------------------------------------------------------------------------------------------------------------------------------------------------------------------------------------------------------------------------------------------------------------------------------------------------------------------------------------------------------------------------------------------------------------------------------------------------------------------------------------------------------------------------------------------|

|  |  |  |  |  |  |                                                                                                                                                                                                                                                                                                                                                                                                                                                                                                                                                                                                                                                                                                                                                                                                                                                                                                                                                                                                                                                                                                                                                                                                                                                                                                                                                                                                                                                                                                                                                                                                                                                   |
|--|--|--|--|--|--|---------------------------------------------------------------------------------------------------------------------------------------------------------------------------------------------------------------------------------------------------------------------------------------------------------------------------------------------------------------------------------------------------------------------------------------------------------------------------------------------------------------------------------------------------------------------------------------------------------------------------------------------------------------------------------------------------------------------------------------------------------------------------------------------------------------------------------------------------------------------------------------------------------------------------------------------------------------------------------------------------------------------------------------------------------------------------------------------------------------------------------------------------------------------------------------------------------------------------------------------------------------------------------------------------------------------------------------------------------------------------------------------------------------------------------------------------------------------------------------------------------------------------------------------------------------------------------------------------------------------------------------------------|
|  |  |  |  |  |  | W_A:NOP8:ILS1:C6_04530C_A:C7_00160C_A:C7_00220W_A:C7_00330C_A:DCC1:P<br>SF3:THG1:RPA135:NOP15:YML6:C7_01020C_A:C7_01030C_A:DBP7:C7_01210C_A:A<br>SC1:C7_01270C_A:PSF1:C7_01360C_A:C7_01400C_A:GIR2:PRT1:FLU1:C7_01570C_<br>A:SMC6:C7_01600W_A:C7_01950W_A:LIG1:C7_02340C_A:C7_02460C_A:C7_02660<br>C_A:C7_02930C_A:IFM1:C7_03400C_A:ISY1:ENP2:ARG4:C7_03590C_A:ENP1:HIS7:<br>MRP7:C7_03850W_A:C7_03880C_A:C7_04150W_A:UTP18:MMS22:RTT109:CR_004<br>30C_A:CR_00460C_A:MRPL6:ADE1:BUD22:PWP2:CR_00830W_A:TRM1:DAL81:CTF1<br>8:CR_01260W_A:CR_01320C_A:CR_01410C_A:PRS:CR_01550C_A:TRP2:CR_01600C<br>_A:MET6:CR_01670W_A:CDC60:CR_01700C_A:CR_01710W_A:CR_01780W_A:CR_0<br>1950W_A:CR_02030C_A:MCM6:MET2:ERG25:CR_02420W_A:CR_02430C_A:CHO2:<br>CR_02550C_A:RRP9:RPC31:CR_02890C_A:SRP40:ARC1:SMC5:CR_03110W_A:CR_03<br>200C_A:CR_03230W_A:CR_03340C_A:CR_03360W_A:KTI12:MTG1:CR_03400W_A:<br>CR_03440W_A:NCS2:YVH1:SGD1:SMC1:PRP42:CR_03760W_A:CR_03940W_A:CR_0<br>4110W_A:CR_04160C_A:CR_04170W_A:QDR1:CR_04240C_A:CR_04300W_A:CR_04<br>500C_A:CR_04560C_A:CR_04710W_A:ADE6:RPB8:CR_04920W_A:NOC2:CR_05550C<br>_A:RNR3:MTG2:DBP8:RFX1:RPL7:CR_06230W_A:FGR50:CR_06450W_A:RRN11:HSP<br>60:CR_06680C_A:NMD3:CR_06840W_A:ATX1:CR_06970C_A:CR_06980W_A:POL2:<br>MIS11:CR_07030C_A:URA2:CR_07310W_A:PIF1:CR_07480W_A:FUN30:CR_07640C<br>_A:ARO2:CDC45:DBP6:ASF1:IMP4:CR_08000C_A:NOP10:SSB1:RIO2:ATS1:CR_08330<br>W_A:CYS3:RPP2A:GSH2:CR_08410W_A:TSR1:CR_08940W_A:MPS1:CR_09010C_A:C<br>R_09310W_A:SSF1:CR_09740W_A:MED21:CR_09800C_A:DPB2:SIK1:CR_09990W_A<br>:CR_10180W_A:UTP5:CR_10260W_A:CR_10410C_A:CR_10470C_A:MCD1:DRS1:YHB<br>4:PRO1:LTV1:POP3 |
|--|--|--|--|--|--|---------------------------------------------------------------------------------------------------------------------------------------------------------------------------------------------------------------------------------------------------------------------------------------------------------------------------------------------------------------------------------------------------------------------------------------------------------------------------------------------------------------------------------------------------------------------------------------------------------------------------------------------------------------------------------------------------------------------------------------------------------------------------------------------------------------------------------------------------------------------------------------------------------------------------------------------------------------------------------------------------------------------------------------------------------------------------------------------------------------------------------------------------------------------------------------------------------------------------------------------------------------------------------------------------------------------------------------------------------------------------------------------------------------------------------------------------------------------------------------------------------------------------------------------------------------------------------------------------------------------------------------------------|

|           |                                                |                                       |                                                     |          |       |                                                                                                                                                                                                                                                                                                                                                                                                                                                                                                                                                                                                                                                                                                                                                                                                                                                                                                                                                                                                     |
|-----------|------------------------------------------------|---------------------------------------|-----------------------------------------------------|----------|-------|-----------------------------------------------------------------------------------------------------------------------------------------------------------------------------------------------------------------------------------------------------------------------------------------------------------------------------------------------------------------------------------------------------------------------------------------------------------------------------------------------------------------------------------------------------------------------------------------------------------------------------------------------------------------------------------------------------------------------------------------------------------------------------------------------------------------------------------------------------------------------------------------------------------------------------------------------------------------------------------------------------|
| 7182<br>6 | protein-<br>RNA<br>complex<br>organizat<br>ion | 111 out of<br>1061<br>genes,<br>10.5% | 198 out of<br>6473<br>backgroun<br>d genes,<br>3.1% | 3.17E-35 | 0.00% | C1_02900C_A:C1_04040C_A:C1_04120C_A:ERB1:NOP4:C1_04710C_A:C1_04970W_A:RRP6:C1_05360C_A:RPS27A:C1_06760C_A:ERD1:FUN12:JIP5:C1_09040C_A:CEF1:YTM1:C1_09710C_A:RPA190:C1_10970W_A:TRP3:CSI2:C1_12440W_A:C1_12750C_A:C1_12760W_A:C1_14080W_A:C2_00200W_A:C2_00280C_A:C2_01070W_A:PRP39:UTP22:C2_02540W_A:PRP3:SNU114:MAK5:C2_05160C_A:RPF2:C2_05750W_A:C2_05830C_A:C2_06650C_A:RPL11:C2_09180W_A:C2_10740C_A:C3_00100W_A:C3_00660W_A:BMS1:ARP9:C3_01560W_A:C3_02020W_A:C3_02040C_A:C3_02350W_A:C3_02670W_A:SMC3:C3_03330C_A:C3_04370C_A:MAK21:ARV1:C3_05160C_A:QDR2:NOG1:C3_06370C_A:PRP5:RLP24:HIT1:C4_05010W_A:C4_05230C_A:C4_06410W_A:RMT2:SPB4:C5_01930W_A:C5_02010C_A:C5_02070C_A:TIF5:C5_04720C_A:HAS1:C5_05340W_A:CIC1:TIF3:C6_02230W_A:PRP45:SPB1:RPA135:DBP7:FLU1:C7_03400C_A:ISY1:ENP2:UTP18:BUD22:PWP2:CR_00830W_A:CR_01410C_A:CR_01550C_A:CR_01700C_A:ARC1:YVH1:SGD1:CR_03940W_A:CR_04110W_A:CR_04170W_A:NOC2:CR_05550C_A:SDA1:CR_06680C_A:TSR1:ELF1:SSF1:CR_09800C_A:CR_10470C_A:DRS1:LTV1 |
|-----------|------------------------------------------------|---------------------------------------|-----------------------------------------------------|----------|-------|-----------------------------------------------------------------------------------------------------------------------------------------------------------------------------------------------------------------------------------------------------------------------------------------------------------------------------------------------------------------------------------------------------------------------------------------------------------------------------------------------------------------------------------------------------------------------------------------------------------------------------------------------------------------------------------------------------------------------------------------------------------------------------------------------------------------------------------------------------------------------------------------------------------------------------------------------------------------------------------------------------|



|     |                                   |                                     |                                                     |          |       |                                                                                                                                                                                                                                                                                                                                                                                                                                                                                                                                                                                                                                                                                                                                                                                                                                     |
|-----|-----------------------------------|-------------------------------------|-----------------------------------------------------|----------|-------|-------------------------------------------------------------------------------------------------------------------------------------------------------------------------------------------------------------------------------------------------------------------------------------------------------------------------------------------------------------------------------------------------------------------------------------------------------------------------------------------------------------------------------------------------------------------------------------------------------------------------------------------------------------------------------------------------------------------------------------------------------------------------------------------------------------------------------------|
| 460 | maturati<br>on of<br>5.8S<br>rRNA | 91 out of<br>1061<br>genes,<br>8.6% | 144 out of<br>6473<br>backgroun<br>d genes,<br>2.2% | 3.32E-34 | 0.00% | RRS1:C1_01160C_A:RPP1:C1_03830C_A:C1_04040C_A:RRP6:C1_06540C_A:C1_076<br>60W_A:C1_07960W_A:DIP2:C1_09710C_A:DBP3:NEP1:KRR1:CSI2:C1_12350W_A:R<br>EX3:RMP1:C1_13820C_A:C1_14080W_A:MPP10:FAV3:C2_00200W_A:C2_00410C_<br>A:C2_00820W_A:REX2:C2_02540W_A:C2_02630W_A:TBF1:MAK5:RPF2:LAS1:MAK1<br>6:C2_06660W_A:FHL1:NOC4:RCL1:C2_09160W_A:RRP15:BUD21:UTP20:C3_01560<br>W_A:C3_02020W_A:C3_02040C_A:C3_02350W_A:C3_02840W_A:NOP14:C3_0516<br>0C_A:ISW2:C3_06370C_A:NSA2:RAD4:C3_07800C_A:DUR4:C4_00690C_A:RAT1:HIT<br>1:SAS10:C4_03740W_A:RRP42:C4_04520W_A:BAS1:BUD23:C5_02070C_A:UTP13:C<br>5_03920C_A:C5_04840C_A:NOP5:CIC1:SPB1:C7_03400C_A:ENP1:C7_03850W_A:UT<br>P18:PWP2:CR_02420W_A:CR_02550C_A:RRP9:CR_03200C_A:CR_03360W_A:DBP8:<br>RPL7:CR_06450W_A:PIF1:DBP6:ATS1:CR_08330W_A:MPS1:CR_09800C_A:CR_1026<br>0W_A:CR_10410C_A |
|-----|-----------------------------------|-------------------------------------|-----------------------------------------------------|----------|-------|-------------------------------------------------------------------------------------------------------------------------------------------------------------------------------------------------------------------------------------------------------------------------------------------------------------------------------------------------------------------------------------------------------------------------------------------------------------------------------------------------------------------------------------------------------------------------------------------------------------------------------------------------------------------------------------------------------------------------------------------------------------------------------------------------------------------------------------|

|     |                                                                                                                                       |                                     |                                                     |          |       |                                                                                                                                                                                                                                                                                                                                                                                                                                                                                                                                                                                                                                                                                                                                                                                                                                     |
|-----|---------------------------------------------------------------------------------------------------------------------------------------|-------------------------------------|-----------------------------------------------------|----------|-------|-------------------------------------------------------------------------------------------------------------------------------------------------------------------------------------------------------------------------------------------------------------------------------------------------------------------------------------------------------------------------------------------------------------------------------------------------------------------------------------------------------------------------------------------------------------------------------------------------------------------------------------------------------------------------------------------------------------------------------------------------------------------------------------------------------------------------------------|
| 466 | maturati<br>on of<br>5.8S<br>rRNA<br>from<br>tricistroni<br>c rRNA<br>transcrip<br>t (SSU-<br>rRNA,<br>5.8S<br>rRNA,<br>LSU-<br>rRNA) | 91 out of<br>1061<br>genes,<br>8.6% | 144 out of<br>6473<br>backgroun<br>d genes,<br>2.2% | 3.32E-34 | 0.00% | RRS1:C1_01160C_A:RPP1:C1_03830C_A:C1_04040C_A:RRP6:C1_06540C_A:C1_076<br>60W_A:C1_07960W_A:DIP2:C1_09710C_A:DBP3:NEP1:KRR1:CSI2:C1_12350W_A:R<br>EX3:RMP1:C1_13820C_A:C1_14080W_A:MPP10:FAV3:C2_00200W_A:C2_00410C_<br>A:C2_00820W_A:REX2:C2_02540W_A:C2_02630W_A:TBF1:MAK5:RPF2:LAS1:MAK1<br>6:C2_06660W_A:FHL1:NOC4:RCL1:C2_09160W_A:RRP15:BUD21:UTP20:C3_01560<br>W_A:C3_02020W_A:C3_02040C_A:C3_02350W_A:C3_02840W_A:NOP14:C3_0516<br>0C_A:ISW2:C3_06370C_A:NSA2:RAD4:C3_07800C_A:DUR4:C4_00690C_A:RAT1:HIT<br>1:SAS10:C4_03740W_A:RRP42:C4_04520W_A:BAS1:BUD23:C5_02070C_A:UTP13:C<br>5_03920C_A:C5_04840C_A:NOP5:CIC1:SPB1:C7_03400C_A:ENP1:C7_03850W_A:UT<br>P18:PWP2:CR_02420W_A:CR_02550C_A:RRP9:CR_03200C_A:CR_03360W_A:DBP8:<br>RPL7:CR_06450W_A:PIF1:DBP6:ATS1:CR_08330W_A:MPS1:CR_09800C_A:CR_1026<br>0W_A:CR_10410C_A |
|-----|---------------------------------------------------------------------------------------------------------------------------------------|-------------------------------------|-----------------------------------------------------|----------|-------|-------------------------------------------------------------------------------------------------------------------------------------------------------------------------------------------------------------------------------------------------------------------------------------------------------------------------------------------------------------------------------------------------------------------------------------------------------------------------------------------------------------------------------------------------------------------------------------------------------------------------------------------------------------------------------------------------------------------------------------------------------------------------------------------------------------------------------------|

|           |                               |                                       |                                                   |          |       |                                                                                                                                                                                                                                                                                                                                                                                                                                                                                                                                                                                                                                                                                                                                                                                                                                                                                                                                                                                                                                                                                                                                                                                                                                                                                                                                                                                                                                                                                                                                                                                                                                                                                                                                                                                                                                                                                                                                                                                                                                                                                                                                                                                                                                                                                                                                                                                                                                                                                                                                                                                                                                                                          |
|-----------|-------------------------------|---------------------------------------|---------------------------------------------------|----------|-------|--------------------------------------------------------------------------------------------------------------------------------------------------------------------------------------------------------------------------------------------------------------------------------------------------------------------------------------------------------------------------------------------------------------------------------------------------------------------------------------------------------------------------------------------------------------------------------------------------------------------------------------------------------------------------------------------------------------------------------------------------------------------------------------------------------------------------------------------------------------------------------------------------------------------------------------------------------------------------------------------------------------------------------------------------------------------------------------------------------------------------------------------------------------------------------------------------------------------------------------------------------------------------------------------------------------------------------------------------------------------------------------------------------------------------------------------------------------------------------------------------------------------------------------------------------------------------------------------------------------------------------------------------------------------------------------------------------------------------------------------------------------------------------------------------------------------------------------------------------------------------------------------------------------------------------------------------------------------------------------------------------------------------------------------------------------------------------------------------------------------------------------------------------------------------------------------------------------------------------------------------------------------------------------------------------------------------------------------------------------------------------------------------------------------------------------------------------------------------------------------------------------------------------------------------------------------------------------------------------------------------------------------------------------------------|
| 4423<br>7 | cellular<br>metabolic process | 781 out of<br>1061<br>genes,<br>73.6% | 3715 out of<br>6473<br>background genes,<br>57.4% | 8.92E-30 | 0.00% | RIM8:LEU4:HBR1:C1_00510W_A:C1_00520W_A:CNS1:RPO41:SPE1:NRM1:RRS1:TRI1:NMA111:HMT1:C1_01150C_A:C1_01160C_A:TRM2:ABC1:C1_01530C_A:CYS4:C1_02090C_A:ABP140:CWH8:C1_02380C_A:C1_02390W_A:C1_02450C_A:SNZ1:SNO1:HOM6:LYS2:PDE2:MIA40:C1_02900C_A:C1_02970W_A:TSR2:C1_03260W_A:C1_03370W_A:C1_03540C_A:C1_03630W_A:C1_03790C_A:RPP1:C1_03830C_A:KTR4:C1_04040C_A:C1_04120C_A:ERB1:RPN4:NOP4:C1_04510W_A:C1_04530C_A:C1_04710C_A:MRPL37:C1_04970W_A:RHD1:ARG2:RRP6:REI1:TRY2:ARO4:C1_05220C_A:C1_05270C_A:C1_05360C_A:C1_05380C_A:RSM22:RPS27A:C1_05630C_A:FAL1:C1_05650W_A:RAD10:C1_05990C_A:BUD16:C1_06530C_A:C1_06540C_A:NOP6:C1_06760C_A:RIA1:YMC1:C1_07340W_A:C1_07470C_A:LHP1:C1_07510W_A:C1_07660W_A:ADE4:ECO1:GCS1:ADE5,7:MRPL3:ERD1:C1_07950C_A:C1_07960W_A:FUN12:DRG1:CAT8:MLT1:DIP2:SAM4:GCR3:UPC2:C1_08520C_A:GCD6:C1_08630W_A:MSS116:C1_08890C_A:NAR1:CEF1:C1_09390W_A:GUA1:C1_09610W_A:C1_09620C_A:C1_09710C_A:C1_09790C_A:C1_09840C_A:BUD31:C1_09910C_A:PDC2:DBP3:MNN23:C1_10080W_A:C1_10200C_A:C1_10340W_A:FCY23:C1_10620W_A:APN2:RPA190:C1_10690W_A:C1_10920W_A:C1_10950C_A:C1_10970W_A:C1_11000C_A:PET127:FGR39:NEP1:KRR1:SAM2:GAR1:C1_11610C_A:C1_11790W_A:MUP1:C1_11880W_A:C1_11900C_A:C1_11910W_A:SER33:TRP3:C1_12280C_A:CSI2:MRPS9:C1_12350W_A:WRS1:C1_12440W_A:C1_12570C_A:C1_12630C_A:C1_12670C_A:C1_12750C_A:C1_12760W_A:FEN1:C1_12820C_A:RPL14:C1_13060C_A:REX3:C1_13330C_A:RMP1:C1_13380W_A:AGC1:KNS1:MCU1:C1_13560W_A:C1_13820C_A:MET3:C1_14080W_A:C1_14330W_A:MPP10:FAV3:C2_00200W_A:C2_00280C_A:C2_00390C_A:C2_00410C_A:C2_00810C_A:C2_00820W_A:C2_00840W_A:MXR1:C2_01070W_A:C2_01220W_A:C2_01240C_A:ESC4:C2_01420C_A:APT1:REX2:C2_01740C_A:C2_01820C_A:PRP39:C2_01860C_A:C2_01870C_A:ARO3:C2_02120W_A:C2_02270C_A:C2_02420C_A:UTP21:UTP22:PRS1:C2_02540W_A:C2_02630W_A:PDR17:SER2:C2_02930C_A:MET1:BN A31:SMP3:PRP3:C2_03560C_A:MNN42:GPI13:SCH9:C2_03950W_A:C2_04120C_A:UGA1:TBFI:BAT21:C2_04340C_A:SUV3:RIM2:C2_04570W_A:SNU114:C2_04700C_A:C2_04820W_A:PZF1:CKA2:C2_04990W_A:C2_05050C_A:C2_05080C_A:MAK5:C2_05160C_A:CDC21:RPF2:C2_05270W_A:RPC40:KTI11:C2_05670C_A:C2_05750W_A:C2_05830C_A:C2_05840W_A:C2_05860C_A:IDP1:C2_05980C_A:LAS1:CSM3:ECM17:ILV1:SER1:MAK16:C2_06480W_A:C2_06520C_A:C2_06530W_A:VAS1:C2_06650C_A:C2_06660W_A:RPL11:FHL1:C2_06850W_A:C2_06950C_A:SPE3:AAH1:RCK2:DQD1:NOC4:C2_07360W_A:C2_07410W_A:RCL1:C2_07680W_A:PHO86:PRS5:C2_07920W_A:NSA1:C2_08180C_A:EAF3:RRP8:C2_08530C_A:MSU1:UTP15:MFG1:APE3:CDC47:ASN1:MET10:C2_09160W_A:C2_09180W_A:MED18:C2_09310C_A:PES1:TAZ1:RRP15:C2_09500W_A:C2_09660W_A:LEU42:COE1:SMM1:C2_09920W_A:CWC22:UBP8:GPD1:PUS7:HEM3:C2_10740C_A:RPC11:C2_10810W_A:RPS24:C3_00100W_A:ULP3: |
|-----------|-------------------------------|---------------------------------------|---------------------------------------------------|----------|-------|--------------------------------------------------------------------------------------------------------------------------------------------------------------------------------------------------------------------------------------------------------------------------------------------------------------------------------------------------------------------------------------------------------------------------------------------------------------------------------------------------------------------------------------------------------------------------------------------------------------------------------------------------------------------------------------------------------------------------------------------------------------------------------------------------------------------------------------------------------------------------------------------------------------------------------------------------------------------------------------------------------------------------------------------------------------------------------------------------------------------------------------------------------------------------------------------------------------------------------------------------------------------------------------------------------------------------------------------------------------------------------------------------------------------------------------------------------------------------------------------------------------------------------------------------------------------------------------------------------------------------------------------------------------------------------------------------------------------------------------------------------------------------------------------------------------------------------------------------------------------------------------------------------------------------------------------------------------------------------------------------------------------------------------------------------------------------------------------------------------------------------------------------------------------------------------------------------------------------------------------------------------------------------------------------------------------------------------------------------------------------------------------------------------------------------------------------------------------------------------------------------------------------------------------------------------------------------------------------------------------------------------------------------------------------|

|  |  |  |  |  |                                                                                                                                                                                                                                                                                                                                                                                                                                                                                                                                                                                                                                                                                                                                                                                                                                                                                                                                                                                                                                                                                                                                                                                                                                                                                                                                                                                                                                                                                                                                                                                                                                                                                                                                                                                                                                                                                                                                                                                                                                                                                                                                                                                                                                                                                                                                                                                                                                                                                                                                                                                                                                                                    |
|--|--|--|--|--|--------------------------------------------------------------------------------------------------------------------------------------------------------------------------------------------------------------------------------------------------------------------------------------------------------------------------------------------------------------------------------------------------------------------------------------------------------------------------------------------------------------------------------------------------------------------------------------------------------------------------------------------------------------------------------------------------------------------------------------------------------------------------------------------------------------------------------------------------------------------------------------------------------------------------------------------------------------------------------------------------------------------------------------------------------------------------------------------------------------------------------------------------------------------------------------------------------------------------------------------------------------------------------------------------------------------------------------------------------------------------------------------------------------------------------------------------------------------------------------------------------------------------------------------------------------------------------------------------------------------------------------------------------------------------------------------------------------------------------------------------------------------------------------------------------------------------------------------------------------------------------------------------------------------------------------------------------------------------------------------------------------------------------------------------------------------------------------------------------------------------------------------------------------------------------------------------------------------------------------------------------------------------------------------------------------------------------------------------------------------------------------------------------------------------------------------------------------------------------------------------------------------------------------------------------------------------------------------------------------------------------------------------------------------|
|  |  |  |  |  | UTP8:BUD21:SOF1:C3_00660W_A:C3_00830C_A:BMS1:ARP9:UTP20:NCE103:C3_01310W_A:URA3:MET18:RKI1:RPS7A:C3_01520C_A:C3_01560W_A:PPT1:SCM3:C3_01850W_A:C3_02020W_A:C3_02040C_A:UTP4:C3_02180C_A:ILV2:C3_02350W_A:PHA2:DDC1:C3_02670W_A:SMC3:C3_02750W_A:C3_02840W_A:C3_02850C_A:MET13:C3_03070W_A:C3_03110W_A:C3_03330C_A:YAH1:C3_03470W_A:C3_03560W_A:HBR3:RAD53:C3_04370C_A:C3_04380C_A:ADE2:MAK21:RPS15:RPP2B:ARV1:SFP1:NOP14:CEM1:C3_05140C_A:C3_05160C_A:WOR2:RPL8B:C3_05280C_A:C3_05380W_A:GPI1:C3_05440C_A:C3_05510W_A:QDR2:BAT22:C3_05800W_A:C3_05860C_A:TRM12:C3_05900W_A:CTA4:NOG1:C3_06150W_A:MMS21:C3_06240C_A:C3_06270C_A:DOT1:ISW2:C3_06370C_A:NSA2:OPI3:FUN31:C3_06630W_A:PRP5:C3_06830C_A:RPS12:NOP13:C3_07400W_A:C3_07550C_A:C3_07570C_A:RIT1:RAD4:UTP9:C3_07800C_A:HIS4:MET15:DUR4:RLP24:NMD5:HIS5:C4_00690C_A:C4_00700C_A:C4_00740W_A:MLH1:C4_00800W_A:C4_00810C_A:C4_00880W_A:ARO1:C4_00940W_A:PTC8:RAT1:AAT22:C4_01280C_A:PGA53:ILV6:PWP1:NIP1:C4_01500W_A:TOA2:HSX11:TIM10:ZCF25:C4_02400C_A:SLX4:HIT1:C4_02770C_A:SAS10:RPC53:HCA4:C4_02850W_A:ZUO1:C4_02880C_A:NAN1:C4_03140C_A:C4_03170W_A:DAO2:C4_03410W_A:RAD2:C4_03720C_A:C4_03730C_A:C4_03740W_A:NUP84:C4_03830W_A:RRP42:C4_03870C_A:RAM1:ECM1:C4_04130W_A:DUO1:C4_04390W_A:C4_04520W_A:SSZ1:BAS1:C4_04810C_A:AGP3:RPL30:C4_05230C_A:C4_05260W_A:C4_05360C_A:OFD1:HOM3:C4_05650W_A:TRP5:C4_06210C_A:C4_06410W_A:NOP1:C4_06790W_A:C4_06950W_A:MET16:C4_07060W_A:TRP4:C4_07140W_A:C4_07150W_A:C5_00030W_A:C5_00260W_A:C5_00280C_A:DUS4:C5_00320W_A:MRP17:MET14:IFG3:EXO1:RMT2:SPE2:C5_00820W_A:C5_00920W_A:BUD23:CYC3:C5_01140C_A:PUS4:C5_01430C_A:FYV5:SPB4:C5_01610W_A:CCN1:C5_01700W_A:C5_01930W_A:C5_02010C_A:C5_02070C_A:RIX7:THR4:PDE1:C5_02440C_A:TIF5:SPR28:UTP13:C5_02590C_A:BUR2:CKB2:MSW1:C5_02780W_A:C5_02820C_A:C5_03010W_A:RMS1:CAM1-1:C5_03290C_A:PCL1:RPO26:FUR1:C5_03400C_A:C5_03460C_A:C5_03530C_A:C5_03550W_A:MDJ1:C5_03840W_A:HAM1:C5_03920C_A:C5_03970W_A:C5_04120C_A:SAH1:C5_04290C_A:C5_04340W_A:URA7:CSU57:MSM1:C5_04720C_A:HYS2:HAS1:C5_04840C_A:C5_04910W_A:C5_05000C_A:GRF10:PCL5:C5_05250C_A:SDH4:HIS1:C5_05340W_A:ILV3:DNA2:C6_00360C_A:NOP5:C6_00530C_A:C6_00560W_A:FCA1:C6_00640C_A:CDC14:TOP1:HAL22:C6_01040C_A:CIP1:C6_01120C_A:CIC1:C6_01300W_A:PMP1:TIF3:RAD18:HCH1:C6_01890C_A:C6_01980C_A:C6_02150C_A:SWD3:C6_02230W_A:RPL10A:ALG11:C6_02280W_A:C6_02290C_A:C6_02300C_A:C6_02350C_A:C6_02370C_A:C6_02420W_A:C6_02430W_A:PRP45:C6_02690C_A:MRT4:C6_02900C_A:POP4:C6_03210C_A:BMT4:C6_03320W_A:C6_03330C_A:ARP4:C6_03380W_A:C6_03390W_A:C6_03440W_A:NAM2:PAD1:SPB1:C6_04240W_A:NOP8:ILS1:C6_04530C_A:C7_00160C_A:C7_00220W_A:C7_00330C_A:DCC1:PSF3:THG1:RPA1 |
|--|--|--|--|--|--------------------------------------------------------------------------------------------------------------------------------------------------------------------------------------------------------------------------------------------------------------------------------------------------------------------------------------------------------------------------------------------------------------------------------------------------------------------------------------------------------------------------------------------------------------------------------------------------------------------------------------------------------------------------------------------------------------------------------------------------------------------------------------------------------------------------------------------------------------------------------------------------------------------------------------------------------------------------------------------------------------------------------------------------------------------------------------------------------------------------------------------------------------------------------------------------------------------------------------------------------------------------------------------------------------------------------------------------------------------------------------------------------------------------------------------------------------------------------------------------------------------------------------------------------------------------------------------------------------------------------------------------------------------------------------------------------------------------------------------------------------------------------------------------------------------------------------------------------------------------------------------------------------------------------------------------------------------------------------------------------------------------------------------------------------------------------------------------------------------------------------------------------------------------------------------------------------------------------------------------------------------------------------------------------------------------------------------------------------------------------------------------------------------------------------------------------------------------------------------------------------------------------------------------------------------------------------------------------------------------------------------------------------------|

|  |  |  |  |  |  |                                                                                                                                                                                                                                                                                                                                                                                                                                                                                                                                                                                                                                                                                                                                                                                                                                                                                                                                                                                                                                                                                                                                                                                                                                                                                                                                                                                                                                                                         |
|--|--|--|--|--|--|-------------------------------------------------------------------------------------------------------------------------------------------------------------------------------------------------------------------------------------------------------------------------------------------------------------------------------------------------------------------------------------------------------------------------------------------------------------------------------------------------------------------------------------------------------------------------------------------------------------------------------------------------------------------------------------------------------------------------------------------------------------------------------------------------------------------------------------------------------------------------------------------------------------------------------------------------------------------------------------------------------------------------------------------------------------------------------------------------------------------------------------------------------------------------------------------------------------------------------------------------------------------------------------------------------------------------------------------------------------------------------------------------------------------------------------------------------------------------|
|  |  |  |  |  |  | 35:NOP15:YML6:C7_01020C_A:C7_01030C_A:DBP7:C7_01210C_A:ASC1:C7_01270C_A:PSF1:C7_01360C_A:QCE1:C7_01400C_A:GIR2:PRT1:FLU1:C7_01570C_A:SMC6:C7_01600W_A:C7_01950W_A:LIG1:C7_02340C_A:C7_02460C_A:C7_02660C_A:C7_02930C_A:IFM1:C7_03400C_A:ISY1:ENP2:ARG4:C7_03590C_A:ENP1:HIS7:MRP7:C7_03850W_A:C7_03880C_A:MAM33:C7_04150W_A:UTP18:MIS12:MMS22:RTT109:CR_00430C_A:CR_00460C_A:MRPL6:ADE1:BUD22:PWP2:CR_00830W_A:TRM1:DAL81:CTF18:CR_01260W_A:CR_01320C_A:CR_01410C_A:PRS:CR_01550C_A:TRP2:CR_01600C_A:MET6:CR_01670W_A:CDC60:CR_01700C_A:CR_01710W_A:CR_01780W_A:CR_01950W_A:CR_02030C_A:MCM6:MET2:ERG25:CR_02420W_A:CR_02430C_A:CHO2:CR_02550C_A:PAN6:NUE1:RRP9:RPC31:CR_02890C_A:SRP40:ARC1:SMC5:CR_03110W_A:CR_03200C_A:CR_03230W_A:CR_03340C_A:CR_03360W_A:KTI12:MTG1:CR_03400W_A:CR_03440W_A:NCS2:YVH1:SGD1:SMC1:PRP42:CR_03940W_A:MEX67:CR_04110W_A:CR_04160C_A:CR_04170W_A:QDR1:CR_04240C_A:CR_04300W_A:CR_04500C_A:CR_04560C_A:CR_04710W_A:ADE6:RPB8:CR_04920W_A:NOC2:CR_05550C_A:RNR3:MTG2:DBP8:RFX1:RPL7:CR_06230W_A:FGR50:CR_06450W_A:RRN11:HSP60:CR_06680C_A:NMD3:CR_06840W_A:CR_06970C_A:CR_06980W_A:POL2:MIS11:CR_07030C_A:URA2:CR_07310W_A:PIF1:FUN30:CR_07640C_A:ARO2:CDC45:DBP6:IMP4:CR_08000C_A:NOP10:SSB1:RIO2:ATS1:CR_08330W_A:CYS3:RPP2A:GSH2:CR_08410W_A:TSR1:CR_08940W_A:MPS1:CR_09010C_A:ELF1:SSF1:CR_09740W_A:MED21:CR_09800C_A:DPB2:SIK1:CR_09990W_A:CR_10180W_A:CR_10190C_A:UTP5:CR_10260W_A:CR_10410C_A:CR_10470C_A:MCD1:DRS1:PRO1:LTV1:POP3 |
|--|--|--|--|--|--|-------------------------------------------------------------------------------------------------------------------------------------------------------------------------------------------------------------------------------------------------------------------------------------------------------------------------------------------------------------------------------------------------------------------------------------------------------------------------------------------------------------------------------------------------------------------------------------------------------------------------------------------------------------------------------------------------------------------------------------------------------------------------------------------------------------------------------------------------------------------------------------------------------------------------------------------------------------------------------------------------------------------------------------------------------------------------------------------------------------------------------------------------------------------------------------------------------------------------------------------------------------------------------------------------------------------------------------------------------------------------------------------------------------------------------------------------------------------------|

|      |                              |                                     |                                                    |          |       |                                                                                                                                                                                                                                                                                                                                                                                                                                                                                                                                                                                                                                                                                                                                                                                                                                                                                                                 |
|------|------------------------------|-------------------------------------|----------------------------------------------------|----------|-------|-----------------------------------------------------------------------------------------------------------------------------------------------------------------------------------------------------------------------------------------------------------------------------------------------------------------------------------------------------------------------------------------------------------------------------------------------------------------------------------------------------------------------------------------------------------------------------------------------------------------------------------------------------------------------------------------------------------------------------------------------------------------------------------------------------------------------------------------------------------------------------------------------------------------|
| 6399 | tRNA<br>metabolic<br>process | 94 out of<br>1061<br>genes,<br>8.9% | 168 out of<br>6473<br>background<br>genes,<br>2.6% | 2.77E-29 | 0.00% | C1_01150C_A:C1_01160C_A:TRM2:C1_01530C_A:ABP140:RPP1:C1_03830C_A:C1_04530C_A:RRP6:C1_05360C_A:C1_06540C_A:LHP1:C1_09390W_A:C1_09790C_A:C1_12350W_A:WRS1:C1_12570C_A:C1_12820C_A:C1_14330W_A:C2_00820W_A:C2_02420C_A:RPC40:KTI11:C2_05670C_A:C2_06480W_A:VAS1:C2_06660W_A:C2_07360W_A:C2_09160W_A:C2_09310C_A:C2_09500W_A:SMM1:PUS7:RPC11:C3_02840W_A:C3_05140C_A:C3_05800W_A:TRM12:C3_07400W_A:RIT1:C4_00740W_A:C4_00810C_A:C4_00880W_A:C4_00940W_A:C4_01500W_A:RPC53:C4_02850W_A:C4_03140C_A:C4_03730C_A:C4_03740W_A:C4_03830W_A:RRP42:C4_04810C_A:C4_05260W_A:NOP1:C4_07060W_A:DUS4:PUS4:C5_01610W_A:MSW1:RPO26:MSM1:C6_02290C_A:C6_02350C_A:POP4:C6_03210C_A:NAM2:ILS1:C6_04530C_A:C7_00330C_A:THG1:C7_01210C_A:LIG1:C7_02340C_A:C7_03400C_A:TRM1:PRS:CDC60:CR_02550C_A:RPC31:CR_02890C_A:ARC1:CR_03110W_A:CR_03200C_A:KTI12:CR_03400W_A:NCS2:CR_04160C_A:CR_04300W_A:RPB8:CR_05550C_A:ATS1:CR_08940W_A:POP3 |
|------|------------------------------|-------------------------------------|----------------------------------------------------|----------|-------|-----------------------------------------------------------------------------------------------------------------------------------------------------------------------------------------------------------------------------------------------------------------------------------------------------------------------------------------------------------------------------------------------------------------------------------------------------------------------------------------------------------------------------------------------------------------------------------------------------------------------------------------------------------------------------------------------------------------------------------------------------------------------------------------------------------------------------------------------------------------------------------------------------------------|

|      |                         |                                     |                                                    |          |       |                                                                                                                                                                                                                                                                                                                                                                                                                                                                                                                                                                                                                                                                                           |
|------|-------------------------|-------------------------------------|----------------------------------------------------|----------|-------|-------------------------------------------------------------------------------------------------------------------------------------------------------------------------------------------------------------------------------------------------------------------------------------------------------------------------------------------------------------------------------------------------------------------------------------------------------------------------------------------------------------------------------------------------------------------------------------------------------------------------------------------------------------------------------------------|
| 9451 | RNA<br>modificat<br>ion | 64 out of<br>1061<br>genes,<br>6.0% | 97 out of<br>6473<br>backgroun<br>d genes,<br>1.5% | 6.39E-25 | 0.00% | C1_01150C_A:TRM2:ABP140:C1_04530C_A:C1_05360C_A:C1_09390W_A:C1_0979<br>0C_A:C1_10620W_A:NEP1:GAR1:C1_12570C_A:C1_14330W_A:C2_00820W_A:C2_<br>02120W_A:C2_02420C_A:C2_04820W_A:KTI11:C2_06480W_A:C2_07360W_A:RRP<br>8:C2_09500W_A:SMM1:PUS7:C3_05140C_A:C3_05860C_A:TRM12:C3_07400W_A:<br>RIT1:C4_00810C_A:C4_00940W_A:C4_01500W_A:C4_02850W_A:C4_03140C_A:C4_<br>_03730C_A:C4_03830W_A:C4_04810C_A:C4_05260W_A:NOP1:C4_06950W_A:DUS<br>4:BUD23:PUS4:C5_01610W_A:C6_02290C_A:C6_02350C_A:SPB1:C6_04530C_A:C7_<br>_00330C_A:THG1:C7_02340C_A:TRM1:CR_01780W_A:CR_02030C_A:KTI12:NCS2:C<br>R_04110W_A:CR_04160C_A:CR_04170W_A:CR_04240C_A:CR_04300W_A:NOP10:A<br>TS1:CR_08940W_A:CR_10260W_A |
|------|-------------------------|-------------------------------------|----------------------------------------------------|----------|-------|-------------------------------------------------------------------------------------------------------------------------------------------------------------------------------------------------------------------------------------------------------------------------------------------------------------------------------------------------------------------------------------------------------------------------------------------------------------------------------------------------------------------------------------------------------------------------------------------------------------------------------------------------------------------------------------------|

|       |                                         |                            |                                        |          |       |                                                                                                                                                                                                                                                                                                                                                                                                                                                                                                                                                                                                                                                                                                                                                                                                 |
|-------|-----------------------------------------|----------------------------|----------------------------------------|----------|-------|-------------------------------------------------------------------------------------------------------------------------------------------------------------------------------------------------------------------------------------------------------------------------------------------------------------------------------------------------------------------------------------------------------------------------------------------------------------------------------------------------------------------------------------------------------------------------------------------------------------------------------------------------------------------------------------------------------------------------------------------------------------------------------------------------|
| 1E+05 | non-membrane-bounded organelle assembly | 91 out of 1061 genes, 8.6% | 180 out of 6473 background genes, 2.8% | 8.32E-24 | 0.00% | RRS1:C1_04040C_A:ERB1:NOP4:C1_04710C_A:C1_04970W_A:RRP6:C1_05360C_A:RPS27A:C1_06760C_A:RIA1:ERD1:FUN12:JIP5:C1_09040C_A:C1_09710C_A:RPA190:C1_10970W_A:TRP3:CSI2:C1_12440W_A:C1_12760W_A:C1_14080W_A:C2_01070W_A:UTP22:C2_02540W_A:MAK5:C2_05160C_A:RPF2:C2_05750W_A:RPL11:C2_09180W_A:C2_10740C_A:BMS1:ARP9:C3_01560W_A:SCM3:C3_02020W_A:C3_02040C_A:C3_02350W_A:C3_02670W_A:SMC3:C3_04370C_A:MAK21:ARV1:C3_05160C_A:QDR2:C3_06370C_A:C4_02880C_A:C4_05010W_A:C4_05230C_A:TUB4:RMT2:SPB4:C5_02070C_A:TIF5:C5_04720C_A:HAS1:C5_05340W_A:CIC1:C6_02230W_A:ARP4:SPB1:RPA135:DBP7:FLU1:C7_03400C_A:ENP2:UTP18:BUD22:PWP2:CR_01410C_A:CR_01550C_A:YVH1:SGD1:CR_03940W_A:CR_04170W_A:NOC2:CR_05550C_A:SDA1:CR_06680C_A:CR_06740W_A:TSR1:MPS1:ELF1:SSF1:CR_09800C_A:CR_10180W_A:CR_10470C_A:DRS1:LTV1 |
|-------|-----------------------------------------|----------------------------|----------------------------------------|----------|-------|-------------------------------------------------------------------------------------------------------------------------------------------------------------------------------------------------------------------------------------------------------------------------------------------------------------------------------------------------------------------------------------------------------------------------------------------------------------------------------------------------------------------------------------------------------------------------------------------------------------------------------------------------------------------------------------------------------------------------------------------------------------------------------------------------|



|      |                   |                              |                                          |          |       |                                                                                                                                                                                                                                                                                                                                                                                                                                                                                                                                                                                                                                                                                                                                                                                                                                                                                                                                                                                                                                                                                                                                                                                                                                                                                                                                                                                                                                                                                                                                                                                                                                                                                                                                                                                                                                                                                                                                                                                                                                                                                                                                                                                                                                                                                                                                                                                                                                                                                                                                                                                                                                                                          |
|------|-------------------|------------------------------|------------------------------------------|----------|-------|--------------------------------------------------------------------------------------------------------------------------------------------------------------------------------------------------------------------------------------------------------------------------------------------------------------------------------------------------------------------------------------------------------------------------------------------------------------------------------------------------------------------------------------------------------------------------------------------------------------------------------------------------------------------------------------------------------------------------------------------------------------------------------------------------------------------------------------------------------------------------------------------------------------------------------------------------------------------------------------------------------------------------------------------------------------------------------------------------------------------------------------------------------------------------------------------------------------------------------------------------------------------------------------------------------------------------------------------------------------------------------------------------------------------------------------------------------------------------------------------------------------------------------------------------------------------------------------------------------------------------------------------------------------------------------------------------------------------------------------------------------------------------------------------------------------------------------------------------------------------------------------------------------------------------------------------------------------------------------------------------------------------------------------------------------------------------------------------------------------------------------------------------------------------------------------------------------------------------------------------------------------------------------------------------------------------------------------------------------------------------------------------------------------------------------------------------------------------------------------------------------------------------------------------------------------------------------------------------------------------------------------------------------------------------|
| 8152 | metabolic process | 832 out of 1061 genes, 78.4% | 4250 out of 6473 background genes, 65.7% | 6.34E-20 | 0.00% | RIM8:LEU4:HBR1:C1_00510W_A:C1_00520W_A:CNS1:RPO41:SPE1:NRM1:RRS1:TRI1:NMA111:HMT1:C1_01150C_A:C1_01160C_A:TRM2:ABC1:C1_01530C_A:CYS4:C1_02090C_A:ABP140:CWH8:C1_02380C_A:C1_02390W_A:C1_02450C_A:SNZ1:SNO1:HOM6:LYS2:PDE2:MIA40:C1_02900C_A:C1_02970W_A:TSR2:C1_03260W_A:C1_03370W_A:C1_03540C_A:C1_03630W_A:C1_03790C_A:RPP1:C1_03830C_A:KTR4:C1_04040C_A:C1_04120C_A:ERB1:RPN4:NOP4:C1_04510W_A:C1_04530C_A:C1_04710C_A:MRPL37:C1_04970W_A:RHD1:ARG2:RRP6:REI1:TRY2:ARO4:C1_05220C_A:C1_05270C_A:C1_05330C_A:C1_05360C_A:C1_05380C_A:RSM22:RPS27A:C1_05630C_A:FAL1:C1_05650W_A:RAD10:C1_05930C_A:C1_05990C_A:BUD16:C1_06530C_A:C1_06540C_A:NOP6:C1_06760C_A:RIA1:YMC1:C1_07340W_A:C1_07470C_A:LHP1:C1_07510W_A:C1_07660W_A:ADE4:ECO1:C1_07850C_A:GCS1:ADE5,7:MRPL3:ERD1:C1_07950C_A:C1_07960W_A:FUN12:DRG1:CAT8:MLT1:DIP2:SAM4:GCR3:UPC2:C1_08520C_A:GCD6:C1_08630W_A:YMC2:MSS116:C1_08890C_A:NAR1:C1_09040C_A:CEF1:C1_09390W_A:GUA1:C1_09610W_A:C1_09620C_A:C1_09710C_A:C1_09790C_A:C1_09840C_A:BUD31:C1_09910C_A:PDC2:DBP3:MNN23:C1_10080W_A:C1_10200C_A:C1_10340W_A:FCY23:C1_10620W_A:APN2:RPA190:C1_10690W_A:NIT3:C1_10920W_A:C1_10950C_A:C1_10970W_A:C1_11000C_A:PET127:FGR39:NEP1:KRR1:SAM2:GAR1:C1_11610C_A:C1_11790W_A:MUP1:C1_11880W_A:C1_11900C_A:C1_11910W_A:SER33:TRP3:C1_12280C_A:CSI2:MRPS9:C1_12350W_A:WRS1:C1_12440W_A:C1_12570C_A:C1_12630C_A:C1_12640W_A:C1_12670C_A:C1_12750C_A:C1_12760W_A:FEN1:C1_12820C_A:RPL14:C1_13060C_A:REX3:C1_13330C_A:RMP1:C1_13380W_A:AGC1:KNS1:MCU1:C1_13560W_A:C1_13820C_A:MET3:YBP1:C1_14080W_A:C1_14160W_A:C1_14320C_A:C1_14330W_A:MPP10:FAV3:C2_00200W_A:C2_00280C_A:C2_00390C_A:C2_00410C_A:C2_00620C_A:C2_00810C_A:C2_00820W_A:C2_00840W_A:MXR1:C2_01060C_A:C2_01070W_A:C2_01220W_A:C2_01240C_A:ESC4:CLB2:C2_01420C_A:APT1:REX2:C2_01740C_A:C2_01820C_A:PRP39:C2_01860C_A:C2_01870C_A:ARO3:C2_02120W_A:SAM37:C2_02270C_A:C2_02420C_A:UTP21:UTP22:C2_02490C_A:PRS1:C2_02540W_A:C2_02630W_A:PDR17:SER2:C2_02930C_A:MET1:BNA31:SMP3:C2_03130W_A:PRP3:C2_03560C_A:MNN42:C2_03700W_A:C2_03830W_A:GPI13:SCH9:C2_03950W_A:C2_04120C_A:UGA1:TBF1:BAT21:C2_04340C_A:SUV3:RIM2:MED8:C2_04570W_A:SNU114:C2_04700C_A:C2_04820W_A:PZF1:CKA2:C2_04990W_A:C2_05050C_A:C2_05080C_A:MAK5:C2_05160C_A:CDC21:SGO1:RPF2:C2_05270W_A:RPC40:KTI11:C2_05670C_A:C2_05750W_A:C2_05830C_A:C2_05840W_A:C2_05860C_A:IDP1:C2_05980C_A:LAS1:CSM3:ECM17:ILV1:SER1:MAK16:C2_06480W_A:C2_06520C_A:C2_06530W_A:VAS1:C2_06650C_A:C2_06660W_A:AMO2:RPL11:FHL1:C2_06850W_A:C2_06950C_A:SPE3:AAH1:RCK2:DQD1:C2_07270W_A:NOC4:C2_07360W_A:C2_07410W_A:RCL1:C2_07680W_A:PHO86:C2_07860W_A:PRS5:C2_07920W_A:NSA1:C2_08180C_A:C2_08200W_A:EAF3:RRP8:C2_0853 |
|------|-------------------|------------------------------|------------------------------------------|----------|-------|--------------------------------------------------------------------------------------------------------------------------------------------------------------------------------------------------------------------------------------------------------------------------------------------------------------------------------------------------------------------------------------------------------------------------------------------------------------------------------------------------------------------------------------------------------------------------------------------------------------------------------------------------------------------------------------------------------------------------------------------------------------------------------------------------------------------------------------------------------------------------------------------------------------------------------------------------------------------------------------------------------------------------------------------------------------------------------------------------------------------------------------------------------------------------------------------------------------------------------------------------------------------------------------------------------------------------------------------------------------------------------------------------------------------------------------------------------------------------------------------------------------------------------------------------------------------------------------------------------------------------------------------------------------------------------------------------------------------------------------------------------------------------------------------------------------------------------------------------------------------------------------------------------------------------------------------------------------------------------------------------------------------------------------------------------------------------------------------------------------------------------------------------------------------------------------------------------------------------------------------------------------------------------------------------------------------------------------------------------------------------------------------------------------------------------------------------------------------------------------------------------------------------------------------------------------------------------------------------------------------------------------------------------------------------|

|  |  |  |  |  |  |                                                                                                                                                                                                                                                                                                                                                                                                                                                                                                                                                                                                                                                                                                                                                                                                                                                                                                                                                                                                                                                                                                                                                                                                                                                                                                                                                                                                                                                                                                                                                                                                                                                                                                                                                                                                                                                                                                                                                                                                                                                                                                                                                                                                                                                                                                                                                                                                                                                                                                                                                                                                                                                                                                                                                                                                                      |
|--|--|--|--|--|--|----------------------------------------------------------------------------------------------------------------------------------------------------------------------------------------------------------------------------------------------------------------------------------------------------------------------------------------------------------------------------------------------------------------------------------------------------------------------------------------------------------------------------------------------------------------------------------------------------------------------------------------------------------------------------------------------------------------------------------------------------------------------------------------------------------------------------------------------------------------------------------------------------------------------------------------------------------------------------------------------------------------------------------------------------------------------------------------------------------------------------------------------------------------------------------------------------------------------------------------------------------------------------------------------------------------------------------------------------------------------------------------------------------------------------------------------------------------------------------------------------------------------------------------------------------------------------------------------------------------------------------------------------------------------------------------------------------------------------------------------------------------------------------------------------------------------------------------------------------------------------------------------------------------------------------------------------------------------------------------------------------------------------------------------------------------------------------------------------------------------------------------------------------------------------------------------------------------------------------------------------------------------------------------------------------------------------------------------------------------------------------------------------------------------------------------------------------------------------------------------------------------------------------------------------------------------------------------------------------------------------------------------------------------------------------------------------------------------------------------------------------------------------------------------------------------------|
|  |  |  |  |  |  | OC_A:MSU1:UTP15:MFG1:APE3:CDC47:ASN1:MET10:C2_09160W_A:C2_09180W_A<br>:MED18:C2_09310C_A:PES1:TAZ1:RRP15:C2_09500W_A:C2_09660W_A:LEU42:COE<br>1:SMM1:C2_09920W_A:CWC22:UBP8:GPD1:PUS7:HEM3:C2_10740C_A:RPC11:C2_<br>10810W_A:RPS24:C3_00100W_A:ULP3:RHR2:UTP8:BUD21:SOF1:C3_00660W_A:C3<br>_00830C_A:BMS1:ARP9:UTP20:NCE103:C3_01310W_A:URA3:MET18:RKI1:RPS7A:C<br>3_01520C_A:C3_01560W_A:PPT1:SCM3:C3_01850W_A:C3_02020W_A:C3_02040C<br>_A:UTP4:C3_02180C_A:ILV2:C3_02350W_A:PHA2:DDC1:C3_02670W_A:SMC3:C3_0<br>2750W_A:C3_02840W_A:C3_02850C_A:MET13:C3_03070W_A:C3_03110W_A:C3_<br>03330C_A:YAH1:C3_03470W_A:ULP1:C3_03560W_A:HBR3:RAD53:ATF1:C3_04370<br>C_A:C3_04380C_A:ADE2:MAK21:RPS15:RPP2B:ARV1:SFP1:NOP14:CEM1:C3_05140<br>C_A:C3_05160C_A:WOR2:RPL8B:C3_05280C_A:C3_05380W_A:GPI1:C3_05440C_A:<br>C3_05510W_A:QDR2:BAT22:C3_05800W_A:C3_05860C_A:TRM12:C3_05900W_A:C<br>TA4:FAA2:NOG1:C3_06150W_A:MMS21:CYM1:C3_06240C_A:C3_06270C_A:DOT1:I<br>SW2:C3_06370C_A:NSA2:OPI3:C3_06600C_A:FUN31:C3_06630W_A:PRP5:C3_0683<br>0C_A:RPS12:NOP13:C3_07400W_A:C3_07550C_A:C3_07570C_A:RIT1:RAD4:UTP9:C<br>3_07800C_A:HIS4:MET15:DUR4:RLP24:NMD5:HIS5:C4_00690C_A:C4_00700C_A:C4<br>_00740W_A:MLH1:C4_00800W_A:C4_00810C_A:C4_00880W_A:ARO1:C4_00940W<br>_A:PTC8:RAT1:AAT22:C4_01280C_A:PGA53:ILV6:PWP1:C4_01470W_A:NIP1:C4_015<br>00W_A:C4_01560C_A:TOA2:HSX11:TIM10:ZCF25:C4_02400C_A:SLX4:SUL2:HIT1:C4<br>_02770C_A:SAS10:RPC53:HCA4:C4_02850W_A:ZUO1:C4_02880C_A:NAN1:C4_0314<br>0C_A:C4_03170W_A:DAO2:C4_03410W_A:RAD2:C4_03720C_A:C4_03730C_A:C4_0<br>3740W_A:NUP84:C4_03830W_A:RRP42:C4_03870C_A:RAM1:FGR28:ECM1:C4_041<br>30W_A:DUO1:C4_04390W_A:SAP10:C4_04520W_A:SSZ1:BAS1:C4_04810C_A:AGP3<br>:RPL30:C4_05230C_A:C4_05260W_A:C4_05360C_A:OFD1:HOM3:C4_05650W_A:C4<br>_05890W_A:TRP5:C4_06210C_A:C4_06410W_A:NOP1:C4_06790W_A:C4_06950W_<br>A:MET16:C4_07060W_A:TRP4:C4_07140W_A:C4_07150W_A:C5_00030W_A:C5_00<br>260W_A:C5_00280C_A:DUS4:C5_00320W_A:MRP17:MET14:IFG3:EXO1:RMT2:SPE2<br>:C5_00820W_A:C5_00920W_A:BUD23:CYC3:C5_01140C_A:PUS4:C5_01430C_A:FYV<br>5:SPB4:C5_01610W_A:CCN1:C5_01700W_A:C5_01930W_A:C5_02010C_A:C5_0207<br>0C_A:RIX7:THR4:PDE1:C5_02440C_A:TIF5:SPR28:UTP13:C5_02590C_A:BUR2:C5_02<br>740W_A:CKB2:MSW1:C5_02780W_A:C5_02820C_A:C5_03010W_A:RMS1:CAM1-<br>1:C5_03290C_A:PCL1:RPO26:FUR1:C5_03400C_A:C5_03460C_A:C5_03530C_A:C5_<br>03550W_A:MDJ1:C5_03640W_A:C5_03700C_A:C5_03840W_A:HAM1:C5_03920C_<br>A:C5_03970W_A:C5_04120C_A:SAH1:C5_04290C_A:C5_04340W_A:URA7:CSU57:M<br>SM1:C5_04720C_A:HYS2:HAS1:C5_04840C_A:C5_04910W_A:C5_05000C_A:GRF10:<br>PCL5:C5_05250C_A:SDH4:HIS1:C5_05340W_A:ILV3:DNA2:C6_00360C_A:NOP5:C6_<br>00530C_A:C6_00560W_A:FCA1:C6_00640C_A:CDC14:C6_00760W_A:TOP1:HAL22:C<br>6_01040C_A:CIP1:C6_01120C_A:CIC1:EBP1:QDR3:C6_01300W_A:PMP1:TIF3:RAD18 |
|--|--|--|--|--|--|----------------------------------------------------------------------------------------------------------------------------------------------------------------------------------------------------------------------------------------------------------------------------------------------------------------------------------------------------------------------------------------------------------------------------------------------------------------------------------------------------------------------------------------------------------------------------------------------------------------------------------------------------------------------------------------------------------------------------------------------------------------------------------------------------------------------------------------------------------------------------------------------------------------------------------------------------------------------------------------------------------------------------------------------------------------------------------------------------------------------------------------------------------------------------------------------------------------------------------------------------------------------------------------------------------------------------------------------------------------------------------------------------------------------------------------------------------------------------------------------------------------------------------------------------------------------------------------------------------------------------------------------------------------------------------------------------------------------------------------------------------------------------------------------------------------------------------------------------------------------------------------------------------------------------------------------------------------------------------------------------------------------------------------------------------------------------------------------------------------------------------------------------------------------------------------------------------------------------------------------------------------------------------------------------------------------------------------------------------------------------------------------------------------------------------------------------------------------------------------------------------------------------------------------------------------------------------------------------------------------------------------------------------------------------------------------------------------------------------------------------------------------------------------------------------------------|

|  |  |  |  |  |  |                                                                                                                                                                                                                                                                                                                                                                                                                                                                                                                                                                                                                                                                                                                                                                                                                                                                                                                                                                                                                                                                                                                                                                                                                                                                                                                                                                                                                                                                                                                                                                                                                                                                                                                                                                                                                                                                                                                                                                                                                                                                              |
|--|--|--|--|--|--|------------------------------------------------------------------------------------------------------------------------------------------------------------------------------------------------------------------------------------------------------------------------------------------------------------------------------------------------------------------------------------------------------------------------------------------------------------------------------------------------------------------------------------------------------------------------------------------------------------------------------------------------------------------------------------------------------------------------------------------------------------------------------------------------------------------------------------------------------------------------------------------------------------------------------------------------------------------------------------------------------------------------------------------------------------------------------------------------------------------------------------------------------------------------------------------------------------------------------------------------------------------------------------------------------------------------------------------------------------------------------------------------------------------------------------------------------------------------------------------------------------------------------------------------------------------------------------------------------------------------------------------------------------------------------------------------------------------------------------------------------------------------------------------------------------------------------------------------------------------------------------------------------------------------------------------------------------------------------------------------------------------------------------------------------------------------------|
|  |  |  |  |  |  | :HCH1:C6_01890C_A:C6_01980C_A:C6_02150C_A:SWD3:C6_02230W_A:RPL10A:AL<br>G11:C6_02280W_A:C6_02290C_A:C6_02300C_A:C6_02350C_A:C6_02370C_A:C6_0<br>2420W_A:C6_02430W_A:PRP45:C6_02690C_A:MRT4:C6_02900C_A:POP4:C6_0321<br>0C_A:BMT4:C6_03320W_A:C6_03330C_A:ARP4:C6_03380W_A:C6_03390W_A:C6_<br>03440W_A:NAM2:PAD1:SPB1:C6_04240W_A:NOP8:ILS1:C6_04530C_A:C7_00160C<br>_A:C7_00220W_A:C7_00330C_A:DCC1:PSF3:THG1:RPA135:NOP15:YML6:C7_01020<br>C_A:C7_01030C_A:C7_01170C_A:DBP7:C7_01210C_A:ASC1:C7_01270C_A:PSF1:C7_<br>01360C_A:QCE1:C7_01400C_A:GIR2:PRT1:FLU1:C7_01570C_A:SMC6:C7_01600W_<br>A:C7_01950W_A:LIG1:C7_02340C_A:C7_02460C_A:C7_02660C_A:C7_02930C_A:IF<br>M1:C7_03400C_A:ISY1:ENP2:ARG4:C7_03590C_A:ENP1:HIS7:MRP7:C7_03850W_A:<br>C7_03880C_A:MAM33:C7_04150W_A:UTP18:MIS12:MMS22:RTT109:CR_00430C_A<br>:CR_00460C_A:MRPL6:ADE1:BUD22:PWP2:CR_00830W_A:TRM1:DAL81:CTF18:CR_<br>01260W_A:CR_01320C_A:CR_01410C_A:PRS:CR_01550C_A:TRP2:CR_01600C_A:ME<br>T6:CR_01670W_A:CDC60:CR_01700C_A:CR_01710W_A:CR_01780W_A:CR_01950<br>W_A:CR_02030C_A:MCM6:MET2:ERG25:CR_02420W_A:CR_02430C_A:CHO2:CR_0<br>2550C_A:PAN6:NUE1:RRP9:RPC31:CR_02890C_A:SRP40:ARC1:SMC5:CR_03110W_A<br>:CR_03200C_A:CR_03230W_A:CR_03340C_A:CR_03360W_A:KTI12:MTG1:CR_0340<br>0W_A:CR_03440W_A:NCS2:YVH1:SGD1:SMC1:PRP42:CR_03760W_A:CR_03940W_<br>A:MEX67:CR_04110W_A:CR_04160C_A:CR_04170W_A:QDR1:CR_04240C_A:CR_04<br>300W_A:CR_04500C_A:CR_04560C_A:CR_04710W_A:ADE6:RPB8:CR_04920W_A:C<br>R_05480W_A:NOC2:CR_05550C_A:RNR3:MTG2:DBP8:RFX1:RPL7:CR_06230W_A:FG<br>R50:CR_06450W_A:RRN11:HSP60:CR_06680C_A:NMD3:CR_06840W_A:ATX1:CR_0<br>6970C_A:CR_06980W_A:POL2:MIS11:CR_07030C_A:URA2:CR_07310W_A:PIF1:CR_<br>07480W_A:FUN30:CR_07640C_A:ARO2:CDC45:DBP6:ASF1:CR_07940W_A:IMP4:CR<br>_08000C_A:NOP10:SSB1:RIO2:ATS1:CR_08330W_A:CYS3:RPP2A:GSH2:CR_08410W<br>_A:TSR1:CR_08940W_A:MPS1:CR_09010C_A:CR_09310W_A:ELF1:SSF1:CR_09740W<br>_A:MED21:CR_09800C_A:DPB2:SIK1:CR_09990W_A:CR_10180W_A:CR_10190C_A:<br>UTP5:CR_10260W_A:CR_10410C_A:CR_10470C_A:MCD1:DRS1:YHB4:PRO1:LTV1:P<br>OP3 |
|--|--|--|--|--|--|------------------------------------------------------------------------------------------------------------------------------------------------------------------------------------------------------------------------------------------------------------------------------------------------------------------------------------------------------------------------------------------------------------------------------------------------------------------------------------------------------------------------------------------------------------------------------------------------------------------------------------------------------------------------------------------------------------------------------------------------------------------------------------------------------------------------------------------------------------------------------------------------------------------------------------------------------------------------------------------------------------------------------------------------------------------------------------------------------------------------------------------------------------------------------------------------------------------------------------------------------------------------------------------------------------------------------------------------------------------------------------------------------------------------------------------------------------------------------------------------------------------------------------------------------------------------------------------------------------------------------------------------------------------------------------------------------------------------------------------------------------------------------------------------------------------------------------------------------------------------------------------------------------------------------------------------------------------------------------------------------------------------------------------------------------------------------|

|       |                    |                            |                                        |          |       |                                                                                                                                                                                                                                                                                                                                                                                                                                                                                                                                                                                                                                                                                                                                                                                                 |
|-------|--------------------|----------------------------|----------------------------------------|----------|-------|-------------------------------------------------------------------------------------------------------------------------------------------------------------------------------------------------------------------------------------------------------------------------------------------------------------------------------------------------------------------------------------------------------------------------------------------------------------------------------------------------------------------------------------------------------------------------------------------------------------------------------------------------------------------------------------------------------------------------------------------------------------------------------------------------|
| 70925 | organelle assembly | 91 out of 1061 genes, 8.6% | 203 out of 6473 background genes, 3.1% | 5.03E-19 | 0.00% | RRS1:C1_04040C_A:ERB1:NOP4:C1_04710C_A:C1_04970W_A:RRP6:C1_05360C_A:RPS27A:C1_06760C_A:RIA1:ERD1:FUN12:JIP5:C1_09040C_A:C1_09710C_A:RPA190:C1_10970W_A:TRP3:CSI2:C1_12440W_A:C1_12760W_A:C1_14080W_A:C2_01070W_A:UTP22:C2_02540W_A:MAK5:C2_05160C_A:RPF2:C2_05750W_A:RPL11:C2_09180W_A:C2_10740C_A:BMS1:ARP9:C3_01560W_A:SCM3:C3_02020W_A:C3_02040C_A:C3_02350W_A:C3_02670W_A:SMC3:C3_04370C_A:MAK21:ARV1:C3_05160C_A:QDR2:C3_06370C_A:C4_02880C_A:C4_05010W_A:C4_05230C_A:TUB4:RMT2:SPB4:C5_02070C_A:TIF5:C5_04720C_A:HAS1:C5_05340W_A:CIC1:C6_02230W_A:ARP4:SPB1:RPA135:DBP7:FLU1:C7_03400C_A:ENP2:UTP18:BUD22:PWP2:CR_01410C_A:CR_01550C_A:YVH1:SGD1:CR_03940W_A:CR_04170W_A:NOC2:CR_05550C_A:SDA1:CR_06680C_A:CR_06740W_A:TSR1:MPS1:ELF1:SSF1:CR_09800C_A:CR_10180W_A:CR_10470C_A:DRS1:LTV1 |
|-------|--------------------|----------------------------|----------------------------------------|----------|-------|-------------------------------------------------------------------------------------------------------------------------------------------------------------------------------------------------------------------------------------------------------------------------------------------------------------------------------------------------------------------------------------------------------------------------------------------------------------------------------------------------------------------------------------------------------------------------------------------------------------------------------------------------------------------------------------------------------------------------------------------------------------------------------------------------|

|      |                 |                            |                                       |          |       |                                                                                                                                                                                                                                                                                                                                                                                                                                                                                                                                                                                  |
|------|-----------------|----------------------------|---------------------------------------|----------|-------|----------------------------------------------------------------------------------------------------------------------------------------------------------------------------------------------------------------------------------------------------------------------------------------------------------------------------------------------------------------------------------------------------------------------------------------------------------------------------------------------------------------------------------------------------------------------------------|
| 8033 | tRNA processing | 58 out of 1061 genes, 5.5% | 99 out of 6473 background genes, 1.5% | 1.54E-18 | 0.00% | C1_01150C_A:TRM2:ABP140:RPP1:C1_04530C_A:C1_05360C_A:LHP1:C1_09390W_A:C1_09790C_A:C1_12570C_A:C1_14330W_A:C2_00820W_A:C2_02420C_A:KTI11:C2_05670C_A:C2_06480W_A:C2_07360W_A:C2_09500W_A:SMM1:PUS7:C3_02840W_A:C3_05140C_A:C3_05800W_A:TRM12:C3_07400W_A:RIT1:C4_00740W_A:C4_00810C_A:C4_00880W_A:C4_00940W_A:C4_01500W_A:C4_02850W_A:C4_03140C_A:C4_03730C_A:C4_03830W_A:C4_04810C_A:C4_05260W_A:NOP1:DUS4:PUS4:C5_01610W_A:C6_02290C_A:C6_02350C_A:POP4:C6_04530C_A:C7_00330C_A:THG1:LIG1:C7_02340C_A:TRM1:CR_03200C_A:KTI12:NCS2:CR_04160C_A:CR_04300W_A:ATS1:CR_08940W_A:POP3 |
|------|-----------------|----------------------------|---------------------------------------|----------|-------|----------------------------------------------------------------------------------------------------------------------------------------------------------------------------------------------------------------------------------------------------------------------------------------------------------------------------------------------------------------------------------------------------------------------------------------------------------------------------------------------------------------------------------------------------------------------------------|

|     |                                                                                                                                                  |                            |                                        |          |       |                                                                                                                                                                                                                                                                                                                                                                                                                                                                                                                    |
|-----|--------------------------------------------------------------------------------------------------------------------------------------------------|----------------------------|----------------------------------------|----------|-------|--------------------------------------------------------------------------------------------------------------------------------------------------------------------------------------------------------------------------------------------------------------------------------------------------------------------------------------------------------------------------------------------------------------------------------------------------------------------------------------------------------------------|
| 447 | endonuclease cleavage in ITS1 to separate SSU-rRNA from 5.8S rRNA and LSU-rRNA from tricistronic rRNA transcript (SSU-rRNA, 5.8S rRNA, LSU-rRNA) | 59 out of 1061 genes, 5.6% | 103 out of 6473 background genes, 1.6% | 3.32E-18 | 0.00% | RRS1:RPP1:C1_04040C_A:DIP2:C1_09710C_A:NEP1:KRR1:C1_13820C_A:C1_14080W_A:MPP10:FAV3:C2_00200W_A:C2_00410C_A:C2_00820W_A:C2_02540W_A:C2_02630W_A:TBF1:FHL1:NOC4:RCL1:BUD21:UTP20:C3_02020W_A:C3_02040C_A:C3_02350W_A:C3_02840W_A:NOP14:ISW2:C3_06370C_A:RAD4:C3_07800C_A:DUR4:C4_00690C_A:HIT1:SAS10:C4_04520W_A:BAS1:BUD23:C5_02070C_A:UTP13:C5_03920C_A:C5_04840C_A:NOP5:ENP1:C7_03850W_A:UTP18:PWP2:CR_02420W_A:RRP9:CR_03200C_A:CR_03360W_A:DBP8:PIF1:ATS1:CR_08330W_A:MPS1:CR_09800C_A:CR_10260W_A:CR_10410C_A |
|-----|--------------------------------------------------------------------------------------------------------------------------------------------------|----------------------------|----------------------------------------|----------|-------|--------------------------------------------------------------------------------------------------------------------------------------------------------------------------------------------------------------------------------------------------------------------------------------------------------------------------------------------------------------------------------------------------------------------------------------------------------------------------------------------------------------------|

|      |                  |                              |                                          |          |       |                                                                                                                                                                                                                                                                                                                                                                                                                                                                                                                                                                                                                                                                                                                                                                                                                                                                                                                                                                                                                                                                                                                                                                                                                                                                                                                                                                                                                                                                                                                                                                                                                                                                                                                                                                                                                                                                                                                                                                                                                                                                                                                                                                                                                                                                                                                                                                                                                                                                                                                                                                                                                                                                         |
|------|------------------|------------------------------|------------------------------------------|----------|-------|-------------------------------------------------------------------------------------------------------------------------------------------------------------------------------------------------------------------------------------------------------------------------------------------------------------------------------------------------------------------------------------------------------------------------------------------------------------------------------------------------------------------------------------------------------------------------------------------------------------------------------------------------------------------------------------------------------------------------------------------------------------------------------------------------------------------------------------------------------------------------------------------------------------------------------------------------------------------------------------------------------------------------------------------------------------------------------------------------------------------------------------------------------------------------------------------------------------------------------------------------------------------------------------------------------------------------------------------------------------------------------------------------------------------------------------------------------------------------------------------------------------------------------------------------------------------------------------------------------------------------------------------------------------------------------------------------------------------------------------------------------------------------------------------------------------------------------------------------------------------------------------------------------------------------------------------------------------------------------------------------------------------------------------------------------------------------------------------------------------------------------------------------------------------------------------------------------------------------------------------------------------------------------------------------------------------------------------------------------------------------------------------------------------------------------------------------------------------------------------------------------------------------------------------------------------------------------------------------------------------------------------------------------------------------|
| 9987 | cellular process | 879 out of 1061 genes, 82.8% | 4625 out of 6473 background genes, 71.5% | 9.44E-18 | 0.00% | RIM8:C1_00160C_A:LEU4:HBR1:C1_00510W_A:C1_00520W_A:CNS1:RPO41:SPE1:NRM1:RRS1:TRI1:NMA111:HMT1:ZPR1:C1_01150C_A:C1_01160C_A:TRM2:ABC1:C1_01530C_A:C1_01750W_A:CYS4:C1_02090C_A:ABP140:CWH8:C1_02380C_A:C1_02390W_A:C1_02450C_A:SNZ1:SNO1:HOM6:LYS2:PDE2:MIA40:C1_02900C_A:C1_02970W_A:TSR2:ARX1:C1_03260W_A:C1_03370W_A:C1_03540C_A:C1_03630W_A:C1_03790C_A:RPP1:C1_03830C_A:C1_03870C_A:KTR4:C1_04040C_A:C1_04120C_A:ERB1:RPN4:C1_04340C_A:NOP4:C1_04510W_A:C1_04530C_A:C1_04710C_A:MRPL37:C1_04970W_A:RHD1:C1_05010C_A:ARG2:RRP6:REI1:TRY2:ARO4:C1_05210C_A:C1_05220C_A:C1_05270C_A:C1_05330C_A:C1_05360C_A:C1_05380C_A:MTM1:RSM22:RPS27A:C1_05630C_A:FAL1:C1_05650W_A:RAD10:C1_05930C_A:C1_05990C_A:BUD16:C1_06510C_A:C1_06530C_A:C1_06540C_A:NOP6:C1_06760C_A:MEF2:RIA1:YMC1:C1_07340W_A:C1_07470C_A:LHP1:C1_07510W_A:C1_07660W_A:C1_07690C_A:ADE4:ECO1:GCS1:ADE5,7:MRPL3:ERD1:C1_07950C_A:C1_07960W_A:FUN12:DRG1:CAT8:MLT1:DIP2:SAM4:GCR3:UPC2:C1_08520C_A:GCD6:C1_08630W_A:SWI6:YMC2:MSS116:JIP5:C1_08890C_A:NAR1:C1_09040C_A:CTA8:CEF1:C1_09390W_A:GUA1:YTM1:C1_09610W_A:C1_09620C_A:C1_09710C_A:C1_09790C_A:C1_09840C_A:BUD31:C1_09910C_A:PDC2:DBP3:MNN23:C1_10080W_A:C1_10200C_A:C1_10340W_A:FCY23:C1_10620W_A:PEA2:APN2:RPA190:C1_10690W_A:ALP1:C1_10920W_A:C1_10950C_A:C1_10970W_A:C1_11000C_A:PET127:FGR39:NEP1:KRR1:SAM2:GAR1:C1_11610C_A:C1_11790W_A:MUP1:C1_11880W_A:C1_11900C_A:C1_11910W_A:SER33:TRP3:C1_12280C_A:CSI2:MRPS9:C1_12350W_A:WRS1:C1_12440W_A:C1_12570C_A:C1_12630C_A:C1_12640W_A:C1_12670C_A:C1_12680W_A:C1_12750C_A:C1_12760W_A:FEN1:C1_12820C_A:C1_13010W_A:RPL14:C1_13060C_A:C1_13130C_A:REX3:C1_13330C_A:RMP1:C1_13370W_A:C1_13380W_A:AGC1:COX19:KNS1:MCU1:C1_13560W_A:C1_13820C_A:SMF13:MET3:YBP1:C1_14080W_A:C1_14330W_A:MPP10:FAV3:C2_00200W_A:C2_00280C_A:C2_00390C_A:C2_00410C_A:C2_00810C_A:C2_00820W_A:C2_00840W_A:MXR1:HGT8:C2_01070W_A:C2_01220W_A:C2_01240C_A:ESC4:CLB2:C2_01420C_A:APT1:REX2:C2_01740C_A:C2_01820C_A:PRP39:C2_01860C_A:C2_01870C_A:ARO3:C2_02120W_A:SAM37:C2_02270C_A:ECM3:C2_02420C_A:UTP21:UTP22:PRS1:C2_02540W_A:C2_02580W_A:C2_02630W_A:PDR17:SER2:C2_02930C_A:MET1:BNA31:SMP3:PRP3:C2_03560C_A:MNN42:GPI13:SCH9:C2_03950W_A:C2_04120C_A:UGA1:TBF1:BAT21:C2_04340C_A:SUV3:RIM2:C2_04570W_A:SNU114:C2_04700C_A:C2_04820W_A:PZF1:CKA2:C2_04990W_A:C2_05050C_A:FRE9:C2_05080C_A:MAK5:C2_05160C_A:CDC21:SGO1:RPF2:C2_05270W_A:RPC40:KTI11:C2_05670C_A:C2_05750W_A:C2_05830C_A:C2_05840W_A:C2_05860C_A:IDP1:C2_05980C_A:LAS1:CSM3:ECM17:ILV1:SER1:MAK16:RTA3:C2_06480W_A:C2_06520C_A:C2_06530W_A:VAS1:C2_06650C_A:C2_06660W_A:RPL11:FHL1:C2_06850W_A:C2_06950C_A:SPE3:AAH1:RCK2:SMF12:DQD1:NOC4:C2_07360W_A: |
|------|------------------|------------------------------|------------------------------------------|----------|-------|-------------------------------------------------------------------------------------------------------------------------------------------------------------------------------------------------------------------------------------------------------------------------------------------------------------------------------------------------------------------------------------------------------------------------------------------------------------------------------------------------------------------------------------------------------------------------------------------------------------------------------------------------------------------------------------------------------------------------------------------------------------------------------------------------------------------------------------------------------------------------------------------------------------------------------------------------------------------------------------------------------------------------------------------------------------------------------------------------------------------------------------------------------------------------------------------------------------------------------------------------------------------------------------------------------------------------------------------------------------------------------------------------------------------------------------------------------------------------------------------------------------------------------------------------------------------------------------------------------------------------------------------------------------------------------------------------------------------------------------------------------------------------------------------------------------------------------------------------------------------------------------------------------------------------------------------------------------------------------------------------------------------------------------------------------------------------------------------------------------------------------------------------------------------------------------------------------------------------------------------------------------------------------------------------------------------------------------------------------------------------------------------------------------------------------------------------------------------------------------------------------------------------------------------------------------------------------------------------------------------------------------------------------------------------|

|  |  |  |  |  |  |                                                                                                                                                                                                                                                                                                                                                                                                                                                                                                                                                                                                                                                                                                                                                                                                                                                                                                                                                                                                                                                                                                                                                                                                                                                                                                                                                                                                                                                                                                                                                                                                                                                                                                                                                                                                                                                                                                                                                                                                                                                                                                                                                                                                                                                                                                                                                                                                                                                                                                                                                                                                                                                                                                                                                                          |
|--|--|--|--|--|--|--------------------------------------------------------------------------------------------------------------------------------------------------------------------------------------------------------------------------------------------------------------------------------------------------------------------------------------------------------------------------------------------------------------------------------------------------------------------------------------------------------------------------------------------------------------------------------------------------------------------------------------------------------------------------------------------------------------------------------------------------------------------------------------------------------------------------------------------------------------------------------------------------------------------------------------------------------------------------------------------------------------------------------------------------------------------------------------------------------------------------------------------------------------------------------------------------------------------------------------------------------------------------------------------------------------------------------------------------------------------------------------------------------------------------------------------------------------------------------------------------------------------------------------------------------------------------------------------------------------------------------------------------------------------------------------------------------------------------------------------------------------------------------------------------------------------------------------------------------------------------------------------------------------------------------------------------------------------------------------------------------------------------------------------------------------------------------------------------------------------------------------------------------------------------------------------------------------------------------------------------------------------------------------------------------------------------------------------------------------------------------------------------------------------------------------------------------------------------------------------------------------------------------------------------------------------------------------------------------------------------------------------------------------------------------------------------------------------------------------------------------------------------|
|  |  |  |  |  |  | C2_07410W_A:RCL1:C2_07680W_A:PHO86:PRS5:C2_07920W_A:NSA1:KRE30:RPS1<br>0:SIT1:C2_08180C_A:EAF3:RRP8:C2_08530C_A:MSU1:SMC2:UTP15:MFG1:APE3:CD<br>C47:ASN1:MET10:C2_09160W_A:C2_09180W_A:C2_09290W_A:MED18:C2_09310C<br>_A:PES1:TAZ1:RRP15:C2_09500W_A:C2_09660W_A:LEU42:COE1:SMM1:TIM23:C2_<br>09920W_A:CWC22:UBP8:GPD1:PUS7:HEM3:C2_10740C_A:RPC11:C2_10810W_A:R<br>PS24:C3_00100W_A:ULP3:RHR2:UTP8:BUD21:SOF1:C3_00660W_A:C3_00830C_A:B<br>MS1:ARP9:UTP20:NCE103:C3_01310W_A:URA3:MET18:RKI1:RPS7A:C3_01520C_A:<br>C3_01560W_A:C3_01680C_A:PPT1:SCM3:C3_01850W_A:C3_02020W_A:C3_02040<br>C_A:UTP4:C3_02180C_A:ILV2:C3_02350W_A:ALR1:PHA2:DDC1:C3_02670W_A:SMC<br>3:C3_02750W_A:C3_02760C_A:C3_02840W_A:C3_02850C_A:C3_02870C_A:MET13<br>:C3_03070W_A:C3_03110W_A:C3_03330C_A:YAH1:C3_03470W_A:C3_03560W_A:<br>HBR3:RAD53:EGD2:CTP1:C3_04370C_A:C3_04380C_A:ADE2:MAK21:RPS15:RPP2B:A<br>RV1:SFP1:NOP14:CEM1:C3_05140C_A:C3_05160C_A:WOR2:RPL8B:C3_05280C_A:C<br>3_05380W_A:GPI1:C3_05440C_A:C3_05510W_A:QDR2:BAT22:SAM50:C3_05800W<br>_A:C3_05860C_A:TRM12:C3_05900W_A:CTA4:NOG1:C3_06150W_A:MMS21:OAC1:<br>C3_06240C_A:C3_06270C_A:DOT1:ISW2:C3_06370C_A:NSA2:OPI3:C3_06600C_A:F<br>UN31:C3_06630W_A:PRP5:C3_06830C_A:RPS12:NOP13:C3_07400W_A:C3_07550C<br>_A:C3_07570C_A:RIT1:RAD4:UTP9:C3_07800C_A:HIS4:MET15:DUR4:RLP24:NMD5:<br>HIS5:C4_00690C_A:C4_00700C_A:C4_00740W_A:MLH1:C4_00800W_A:C4_00810C<br>_A:C4_00880W_A:ARO1:C4_00940W_A:PTC8:RAT1:C4_01130C_A:AAT22:C4_01280<br>C_A:PGA53:ILV6:PWP1:C4_01470W_A:NIP1:C4_01500W_A:C4_01560C_A:TOA2:HS<br>X11:TIM10:ZCF25:C4_02260C_A:C4_02400C_A:SLX4:SUL2:C4_02720C_A:HIT1:C4_0<br>2770C_A:SAS10:RPC53:HCA4:C4_02850W_A:ZUO1:C4_02880C_A:GST2:NAN1:C4_0<br>3140C_A:C4_03170W_A:DAO2:C4_03410W_A:RAD2:C4_03700W_A:C4_03720C_A:<br>C4_03730C_A:C4_03740W_A:NUP84:C4_03830W_A:RRP42:C4_03870C_A:RAM1:F<br>GR28:ECM1:C4_04130W_A:DUO1:C4_04390W_A:SAP10:C4_04520W_A:SSZ1:BAS1:<br>C4_04810C_A:C4_04820C_A:AGP3:FGR10:RPL30:C4_05010W_A:C4_05230C_A:C4_<br>05260W_A:C4_05360C_A:OFD1:HOM3:TUB4:C4_05650W_A:C4_05890W_A:TRP5:C<br>4_06210C_A:C4_06410W_A:C4_06450W_A:NOP1:C4_06790W_A:C4_06850C_A:C4_<br>_06950W_A:MET16:C4_07060W_A:TRP4:C4_07140W_A:C4_07150W_A:C5_00030<br>W_A:C5_00250C_A:C5_00260W_A:C5_00280C_A:DUS4:C5_00320W_A:MRP17:ME<br>T14:IFG3:EXO1:RMT2:SPE2:C5_00820W_A:C5_00920W_A:BUD23:CLN3:CYC3:C5_01<br>140C_A:PUS4:C5_01430C_A:FYV5:SPB4:C5_01610W_A:CCN1:C5_01700W_A:C5_01<br>930W_A:C5_02010C_A:C5_02070C_A:RIX7:THR4:PDE1:C5_02440C_A:TIF5:SPR28:U<br>TP13:C5_02590C_A:BUR2:C5_02740W_A:CKB2:MSW1:C5_02780W_A:C5_02820C_<br>A:C5_03010W_A:RMS1:CAM1-<br>1:C5_03290C_A:PCL1:RPO26:FUR1:C5_03400C_A:C5_03460C_A:C5_03470C_A:C5_<br>03530C_A:C5_03550W_A:MDJ1:C5_03840W_A:HAM1:C5_03920C_A:C5_03970W_ |
|--|--|--|--|--|--|--------------------------------------------------------------------------------------------------------------------------------------------------------------------------------------------------------------------------------------------------------------------------------------------------------------------------------------------------------------------------------------------------------------------------------------------------------------------------------------------------------------------------------------------------------------------------------------------------------------------------------------------------------------------------------------------------------------------------------------------------------------------------------------------------------------------------------------------------------------------------------------------------------------------------------------------------------------------------------------------------------------------------------------------------------------------------------------------------------------------------------------------------------------------------------------------------------------------------------------------------------------------------------------------------------------------------------------------------------------------------------------------------------------------------------------------------------------------------------------------------------------------------------------------------------------------------------------------------------------------------------------------------------------------------------------------------------------------------------------------------------------------------------------------------------------------------------------------------------------------------------------------------------------------------------------------------------------------------------------------------------------------------------------------------------------------------------------------------------------------------------------------------------------------------------------------------------------------------------------------------------------------------------------------------------------------------------------------------------------------------------------------------------------------------------------------------------------------------------------------------------------------------------------------------------------------------------------------------------------------------------------------------------------------------------------------------------------------------------------------------------------------------|



|  |  |  |  |  |  |                                                                                                                                                                                                                                                                                                                                                                                                                                                                                                                                                                                                                                                                                                                                                                                                                                                                                                                                                                                                                                                                                                                                                                                                                                                                                                                                                                                                                                                                                                                                                                                                                                                                                                                                                                                                                                                                                                                                                                                                                                                                                                                                                                                                                                                                                                                                                                                            |
|--|--|--|--|--|--|--------------------------------------------------------------------------------------------------------------------------------------------------------------------------------------------------------------------------------------------------------------------------------------------------------------------------------------------------------------------------------------------------------------------------------------------------------------------------------------------------------------------------------------------------------------------------------------------------------------------------------------------------------------------------------------------------------------------------------------------------------------------------------------------------------------------------------------------------------------------------------------------------------------------------------------------------------------------------------------------------------------------------------------------------------------------------------------------------------------------------------------------------------------------------------------------------------------------------------------------------------------------------------------------------------------------------------------------------------------------------------------------------------------------------------------------------------------------------------------------------------------------------------------------------------------------------------------------------------------------------------------------------------------------------------------------------------------------------------------------------------------------------------------------------------------------------------------------------------------------------------------------------------------------------------------------------------------------------------------------------------------------------------------------------------------------------------------------------------------------------------------------------------------------------------------------------------------------------------------------------------------------------------------------------------------------------------------------------------------------------------------------|
|  |  |  |  |  |  | A:C5_04120C_A:SAH1:C5_04290C_A:C5_04340W_A:URA7:CSU57:MSM1:C5_04720C_A:HYS2:HAS1:C5_04840C_A:C5_04910W_A:C5_05000C_A:C5_05010W_A:GRF10:PCL5:C5_05250C_A:SDH4:HIS1:C5_05340W_A:ILV3:DNA2:C6_00360C_A:NOP5:C6_00530C_A:C6_00560W_A:FCA1:C6_00640C_A:C6_00660C_A:CDC14:C6_00760W_A:TOP1:HAL22:C6_01040C_A:CIP1:C6_01120C_A:CIC1:QDR3:C6_01300W_A:PMP1:TF3:RAD18:HCH1:C6_01890C_A:C6_01980C_A:C6_02150C_A:SWD3:C6_02230W_A:RPL10A:ALG11:C6_02280W_A:C6_02290C_A:C6_02300C_A:C6_02350C_A:C6_02370C_A:C6_02420W_A:C6_02430W_A:PRP45:C6_02690C_A:MRT4:C6_02900C_A:POP4:C6_02970C_A:C6_03210C_A:BMT4:C6_03320W_A:C6_03330C_A:ARP4:C6_03380W_A:C6_03390W_A:C6_03440W_A:NAM2:C6_03540W_A:PAD1:NOG2:OPT8:SPB1:C6_04240W_A:NOP8:ILS1:C6_04530C_A:C7_00160C_A:C7_00220W_A:C7_00330C_A:DCC1:PSF3:THG1:RPA135:NOP15:YML6:C7_01020C_A:C7_01030C_A:DBP7:C7_01210C_A:ASC1:C7_01270C_A:PSF1:C7_01360C_A:QCE1:C7_01400C_A:GIR2:PRT1:FLU1:C7_01570C_A:SMC6:C7_01600W_A:C7_01660C_A:C7_01950W_A:LIG1:C7_02340C_A:C7_02460C_A:C7_02660C_A:C7_02930C_A:IFM1:C7_03400C_A:ISY1:ENP2:ARG4:C7_03590C_A:ENP1:HIS7:MRP7:C7_03850W_A:C7_03880C_A:MAM33:C7_04150W_A:UTP18:NRG1:MIS12:MMS22:RTT109:CR_00430C_A:CR_00460C_A:MRPL6:ADE1:BUD22:PWP2:CR_00830W_A:TRM1:DAL81:CTF18:CR_01260W_A:CR_01320C_A:CR_01410C_A:PRS:CR_01550C_A:TRP2:CR_01600C_A:MET6:CR_01670W_A:CDC60:CR_01700C_A:CR_01710W_A:CR_01780W_A:CR_01950W_A:MRS2:CR_02030C_A:MCM6:MET2:ERG25:CR_02420W_A:CR_02430C_A:CHO2:CR_02550C_A:PAN6:NUE1:RRP9:RPC31:CR_02890C_A:SRP40:ARC1:SMC5:CR_03110W_A:CR_03200C_A:CR_03230W_A:CR_03340C_A:CR_03360W_A:KTI12:MTG1:CR_03400W_A:CR_03440W_A:NCS2:YVH1:SGD1:SMC1:PRP42:CR_03760W_A:CR_03940W_A:MEX67:CR_04110W_A:CR_04160C_A:CR_04170W_A:QDR1:CR_04240C_A:CR_04300W_A:CR_04500C_A:CR_04560C_A:CR_04710W_A:ADE6:RPB8:CR_04920W_A:BIR1:CR_05480W_A:NOC2:CR_05550C_A:RNR3:MTG2:DBP8:SDA1:RFX1:RPL7:CR_06230W_A:FGR50:CR_06450W_A:RRN11:HSP60:CR_06680C_A:NMD3:CR_06740W_A:CR_06840W_A:BUD5:ATX1:CR_06970C_A:CR_06980W_A:POL2:MIS11:CR_07030C_A:URA2:CR_07310W_A:PIF1:CR_07480W_A:FUN30:CR_07640C_A:ARO2:CDC45:DBP6:ASF1:CR_07940W_A:IMP4:CR_08000C_A:NOP10:SSB1:RIO2:ATS1:CR_08330W_A:CYS3:RPP2A:GSH2:CR_08410W_A:TSR1:CR_08500W_A:CR_08940W_A:MPS1:CR_09010C_A:ELF1:SSF1:CR_09740W_A:MED21:CR_09800C_A:DPB2:SIK1:CR_09990W_A:CR_10180W_A:CR_10190C_A:UTP5:CR_10260W_A:CR_10410C_A:CR_10470C_A:MCD1:DRS1:PRO1:LTV1:POP3 |
|--|--|--|--|--|--|--------------------------------------------------------------------------------------------------------------------------------------------------------------------------------------------------------------------------------------------------------------------------------------------------------------------------------------------------------------------------------------------------------------------------------------------------------------------------------------------------------------------------------------------------------------------------------------------------------------------------------------------------------------------------------------------------------------------------------------------------------------------------------------------------------------------------------------------------------------------------------------------------------------------------------------------------------------------------------------------------------------------------------------------------------------------------------------------------------------------------------------------------------------------------------------------------------------------------------------------------------------------------------------------------------------------------------------------------------------------------------------------------------------------------------------------------------------------------------------------------------------------------------------------------------------------------------------------------------------------------------------------------------------------------------------------------------------------------------------------------------------------------------------------------------------------------------------------------------------------------------------------------------------------------------------------------------------------------------------------------------------------------------------------------------------------------------------------------------------------------------------------------------------------------------------------------------------------------------------------------------------------------------------------------------------------------------------------------------------------------------------------|

|      |                          |                                     |                                                    |          |       |                                                                                                                                                                                                                                                                                                                                                                                                                                                                                        |
|------|--------------------------|-------------------------------------|----------------------------------------------------|----------|-------|----------------------------------------------------------------------------------------------------------------------------------------------------------------------------------------------------------------------------------------------------------------------------------------------------------------------------------------------------------------------------------------------------------------------------------------------------------------------------------------|
| 6400 | tRNA<br>modificat<br>ion | 45 out of<br>1061<br>genes,<br>4.2% | 71 out of<br>6473<br>backgroun<br>d genes,<br>1.1% | 7.66E-16 | 0.00% | C1_01150C_A:TRM2:ABP140:C1_04530C_A:C1_05360C_A:C1_09390W_A:C1_0979<br>0C_A:C1_12570C_A:C1_14330W_A:C2_00820W_A:C2_02420C_A:KTI11:C2_06480<br>W_A:C2_09500W_A:SMM1:PUS7:C3_05140C_A:TRM12:C3_07400W_A:RIT1:C4_00<br>810C_A:C4_00940W_A:C4_01500W_A:C4_02850W_A:C4_03140C_A:C4_03730C_A:<br>C4_03830W_A:C4_04810C_A:C4_05260W_A:DUS4:PUS4:C5_01610W_A:C6_02290<br>C_A:C6_02350C_A:C6_04530C_A:C7_00330C_A:THG1:C7_02340C_A:TRM1:KTI12:N<br>CS2:CR_04160C_A:CR_04300W_A:ATS1:CR_08940W_A |
|------|--------------------------|-------------------------------------|----------------------------------------------------|----------|-------|----------------------------------------------------------------------------------------------------------------------------------------------------------------------------------------------------------------------------------------------------------------------------------------------------------------------------------------------------------------------------------------------------------------------------------------------------------------------------------------|

|       |                                     |                              |                                        |          |       |                                                                                                                                                                                                                                                                                                                                                                                                                                                                                                                                                                                                                                                                                                                                                                                                                                                                                                                                                                                                                                                                                                                                                                                                                                                                                                                    |
|-------|-------------------------------------|------------------------------|----------------------------------------|----------|-------|--------------------------------------------------------------------------------------------------------------------------------------------------------------------------------------------------------------------------------------------------------------------------------------------------------------------------------------------------------------------------------------------------------------------------------------------------------------------------------------------------------------------------------------------------------------------------------------------------------------------------------------------------------------------------------------------------------------------------------------------------------------------------------------------------------------------------------------------------------------------------------------------------------------------------------------------------------------------------------------------------------------------------------------------------------------------------------------------------------------------------------------------------------------------------------------------------------------------------------------------------------------------------------------------------------------------|
| 65003 | protein-containing complex assembly | 145 out of 1061 genes, 13.7% | 444 out of 6473 background genes, 6.9% | 2.19E-15 | 0.00% | C1_02380C_A:C1_02900C_A:C1_03790C_A:C1_04040C_A:C1_04120C_A:ERB1:NOP4:C1_04710C_A:C1_04970W_A:RRP6:C1_05360C_A:RPS27A:C1_06760C_A:ERD1:FUN12:JIP5:C1_09040C_A:CEF1:C1_09620C_A:C1_09710C_A:RPA190:C1_10970W_A:TRP3:CSI2:C1_12440W_A:C1_12640W_A:C1_12750C_A:C1_12760W_A:C1_13010W_A:COX19:C1_14080W_A:C2_00200W_A:C2_00280C_A:C2_01070W_A:PRP39:SAM37:UTP22:C2_02540W_A:PRP3:SNU114:MAK5:C2_05160C_A:SGO1:RPF2:C2_05750W_A:C2_05830C_A:C2_06530W_A:C2_06650C_A:RPL11:C2_06950C_A:CDC47:C2_09180W_A:C2_09290W_A:MED18:TAZ1:C2_10740C_A:C3_00100W_A:C3_00660W_A:BMS1:ARP9:C3_01560W_A:SCM3:C3_02020W_A:C3_02040C_A:C3_02350W_A:C3_02670W_A:SMC3:C3_03330C_A:HBR3:C3_04370C_A:MAK21:ARV1:C3_05160C_A:QDR2:NOG1:DOT1:C3_06370C_A:C3_06600C_A:PRP5:RLP24:TOA2:HIT1:C4_02770C_A:C4_04130W_A:C4_05010W_A:C4_05230C_A:TUB4:C4_06410W_A:RMT2:CYC3:SPB4:C5_01930W_A:C5_02010C_A:C5_02070C_A:TIF5:C5_02740W_A:C5_04720C_A:HAS1:C5_05340W_A:CIC1:TIF3:C6_02230W_A:PRP45:ARP4:SPB1:RPA135:DBP7:FLU1:C7_01600W_A:C7_03400C_A:ISY1:ENP2:C7_03850W_A:UTP18:BUD22:PWP2:CR_00830W_A:DAL81:CR_01410C_A:CR_01550C_A:CR_01700C_A:MCM6:ARC1:CR_03340C_A:YVH1:SGD1:CR_03940W_A:CR_04110W_A:CR_04170W_A:NOC2:CR_05550C_A:SDA1:HSP60:CR_06680C_A:CR_06740W_A:CDC45:TSR1:ELF1:SSF1:CR_09800C_A:CR_10180W_A:CR_10410C_A:CR_10470C_A:DRS1:LTV1 |
|-------|-------------------------------------|------------------------------|----------------------------------------|----------|-------|--------------------------------------------------------------------------------------------------------------------------------------------------------------------------------------------------------------------------------------------------------------------------------------------------------------------------------------------------------------------------------------------------------------------------------------------------------------------------------------------------------------------------------------------------------------------------------------------------------------------------------------------------------------------------------------------------------------------------------------------------------------------------------------------------------------------------------------------------------------------------------------------------------------------------------------------------------------------------------------------------------------------------------------------------------------------------------------------------------------------------------------------------------------------------------------------------------------------------------------------------------------------------------------------------------------------|

|      |                              |                            |                                        |          |       |                                                                                                                                                                                                                                                                                                                                                                                                                                                                     |
|------|------------------------------|----------------------------|----------------------------------------|----------|-------|---------------------------------------------------------------------------------------------------------------------------------------------------------------------------------------------------------------------------------------------------------------------------------------------------------------------------------------------------------------------------------------------------------------------------------------------------------------------|
| 1510 | RNA methylation              | 27 out of 1061 genes, 2.5% | 35 out of 6473 background genes, 0.5%  | 4.83E-12 | 0.00% | C1_01150C_A:ABP140:C1_04530C_A:NEP1:C2_06480W_A:C2_07360W_A:RRP8:C3_05140C_A:C3_05860C_A:TRM12:C3_07400W_A:C4_03730C_A:C4_03830W_A:C4_04810C_A:NOP1:BUD23:SPB1:C6_04530C_A:C7_02340C_A:TRM1:CR_01780W_A:CR_02030C_A:CR_04160C_A:CR_04170W_A:CR_04300W_A:CR_08940W_A:CR_10260W_A                                                                                                                                                                                     |
| 6520 | amino acid metabolic process | 73 out of 1061 genes, 6.9% | 191 out of 6473 background genes, 3.0% | 2.41E-10 | 0.00% | LEU4:C1_01530C_A:CYS4:SNZ1:HOM6:LYS2:ARG2:ARO4:SAM4:SAM2:C1_11610C_A:SER33:TRP3:WRS1:C2_00390C_A:MXR1:C2_01860C_A:ARO3:PRS1:SER2:MET1:BNA31:UGA1:BAT21:IDP1:ILV1:SER1:VAS1:C2_08530C_A:ASN1:C2_09310C_A:LEU42:ILV2:PHA2:MET13:C3_03470W_A:BAT22:HIS4:MET15:HIS5:ARO1:AAT22:ILV6:HOM3:TRP5:MET16:TRP4:IFG3:THR4:MSW1:C5_02820C_A:SAH1:MSM1:HIS1:ILV3:NAM2:ILS1:ARG4:HIS7:PRS:TRP2:MET6:CDC60:MET2:ARC1:CR_03110W_A:CR_03400W_A:MIS11:URA2:ARO2:CYS3:CR_09010C_A:PRO1 |

|       |                                      |                            |                                        |          |       |                                                                                                                                                                                                                                                                                                                                                                                                                      |
|-------|--------------------------------------|----------------------------|----------------------------------------|----------|-------|----------------------------------------------------------------------------------------------------------------------------------------------------------------------------------------------------------------------------------------------------------------------------------------------------------------------------------------------------------------------------------------------------------------------|
| 16053 | organic acid biosynthetic process    | 65 out of 1061 genes, 6.1% | 164 out of 6473 background genes, 2.5% | 7.79E-10 | 0.00% | RIM8:LEU4:C1_00510W_A:SPE1:HMT1:CYS4:SNZ1:HOM6:LYS2:C1_02970W_A:ARG2:ARO4:C1_05990C_A:SAM4:C1_11610C_A:SER33:TRP3:FEN1:C1_13330C_A:C2_00390C_A:MXR1:C2_01860C_A:ARO3:PRS1:SER2:MET1:BNA31:BAT21:IDP1:ECM17:ILV1:SER1:SPE3:C2_07410W_A:C2_08530C_A:ASN1:LEU42:ILV2:PHA2:MET13:HIS4:MET15:HIS5:ARO1:ILV6:HOM3:TRP5:MET16:TRP4:SPE2:THR4:C5_02820C_A:HIS1:ILV3:ARG4:HIS7:TRP2:MET6:MET2:ERG25:PAN6:MIS11:ARO2:CYS3:PRO1 |
| 46394 | carboxylic acid biosynthetic process | 65 out of 1061 genes, 6.1% | 164 out of 6473 background genes, 2.5% | 7.79E-10 | 0.00% | RIM8:LEU4:C1_00510W_A:SPE1:HMT1:CYS4:SNZ1:HOM6:LYS2:C1_02970W_A:ARG2:ARO4:C1_05990C_A:SAM4:C1_11610C_A:SER33:TRP3:FEN1:C1_13330C_A:C2_00390C_A:MXR1:C2_01860C_A:ARO3:PRS1:SER2:MET1:BNA31:BAT21:IDP1:ECM17:ILV1:SER1:SPE3:C2_07410W_A:C2_08530C_A:ASN1:LEU42:ILV2:PHA2:MET13:HIS4:MET15:HIS5:ARO1:ILV6:HOM3:TRP5:MET16:TRP4:SPE2:THR4:C5_02820C_A:HIS1:ILV3:ARG4:HIS7:TRP2:MET6:MET2:ERG25:PAN6:MIS11:ARO2:CYS3:PRO1 |

|           |                           |                            |                                       |          |       |                                                                                                                                                                                                                                                                                                                                                                                                   |
|-----------|---------------------------|----------------------------|---------------------------------------|----------|-------|---------------------------------------------------------------------------------------------------------------------------------------------------------------------------------------------------------------------------------------------------------------------------------------------------------------------------------------------------------------------------------------------------|
| 4341<br>4 | macromolecule methylation | 40 out of 1061 genes, 3.8% | 77 out of 6473 background genes, 1.2% | 8.77E-10 | 0.00% | HMT1:C1_01150C_A:ABP140:C1_04530C_A:C1_09040C_A:NEP1:C1_14160W_A:C2_00620C_A:C2_03130W_A:C2_06480W_A:C2_07360W_A:RRP8:UBP8:C3_05140C_A:C3_05860C_A:TRM12:DOT1:C3_07400W_A:C4_03730C_A:C4_03830W_A:C4_04810C_A:NOP1:RMT2:BUD23:RMS1:C6_01120C_A:SWD3:SPB1:C6_04530C_A:C7_02340C_A:TRM1:CR_01780W_A:CR_02030C_A:CR_03760W_A:CR_04160C_A:CR_04170W_A:CR_04300W_A:CR_08940W_A:CR_09310W_A:CR_10260W_A |
| 3225<br>9 | methylation               | 40 out of 1061 genes, 3.8% | 78 out of 6473 background genes, 1.2% | 1.52E-09 | 0.00% | HMT1:C1_01150C_A:ABP140:C1_04530C_A:C1_09040C_A:NEP1:C1_14160W_A:C2_00620C_A:C2_03130W_A:C2_06480W_A:C2_07360W_A:RRP8:UBP8:C3_05140C_A:C3_05860C_A:TRM12:DOT1:C3_07400W_A:C4_03730C_A:C4_03830W_A:C4_04810C_A:NOP1:RMT2:BUD23:RMS1:C6_01120C_A:SWD3:SPB1:C6_04530C_A:C7_02340C_A:TRM1:CR_01780W_A:CR_02030C_A:CR_03760W_A:CR_04160C_A:CR_04170W_A:CR_04300W_A:CR_08940W_A:CR_09310W_A:CR_10260W_A |

|      |                                 |                            |                                        |          |       |                                                                                                                                                                                                                                                                                                                                                                                                                                                                                                           |
|------|---------------------------------|----------------------------|----------------------------------------|----------|-------|-----------------------------------------------------------------------------------------------------------------------------------------------------------------------------------------------------------------------------------------------------------------------------------------------------------------------------------------------------------------------------------------------------------------------------------------------------------------------------------------------------------|
| 8380 | RNA splicing                    | 50 out of 1061 genes, 4.7% | 119 out of 6473 background genes, 1.8% | 3.32E-08 | 0.00% | C1_02090C_A:C1_02900C_A:C1_04120C_A:TRY2:GCR3:MSS116:C1_08890C_A:CEF1:BUD31:C1_10080W_A:C1_12630C_A:C1_12670C_A:C1_12750C_A:C1_13380W_A:C2_00200W_A:C2_00280C_A:C2_01820C_A:PRP39:PRP3:SUV3:SNU114:C2_05670C_A:C2_06650C_A:CWC22:UBP8:C2_10810W_A:C3_00100W_A:C3_00660W_A:C3_01560W_A:C3_03330C_A:C3_04380C_A:C3_05800W_A:PRP5:C4_01280C_A:C4_05360C_A:C4_06410W_A:C5_00920W_A:C5_01930W_A:C5_03010W_A:C5_03400C_A:C6_00530C_A:PRP45:C6_02690C_A:C6_03440W_A:NAM2:LIG1:ISY1:CR_01700C_A:CR_03230W_A:PRP42 |
| 8652 | amino acid biosynthetic process | 43 out of 1061 genes, 4.1% | 97 out of 6473 background genes, 1.5%  | 1.07E-07 | 0.00% | LEU4:CYS4:SNZ1:HOM6:LYS2:ARG2:SAM4:C1_11610C_A:SER33:TRP3:C2_00390C_A:MXR1:C2_01860C_A:PRS1:SER2:MET1:BAT21:IDP1:ILV1:SER1:C2_08530C_A:ASN1:LEU42:ILV2:PHA2:MET13:HIS4:MET15:HIS5:HOM3:TRP5:MET16:TRP4:THR4:C5_02820C_A:HIS1:ARG4:HIS7:TRP2:MET6:MET2:CYS3:PRO1                                                                                                                                                                                                                                           |

|       |                                                          |                            |                                       |          |       |                                                                                                                                                                 |
|-------|----------------------------------------------------------|----------------------------|---------------------------------------|----------|-------|-----------------------------------------------------------------------------------------------------------------------------------------------------------------|
| 71035 | nuclear polyadenylation-dependent rRNA catabolic process | 14 out of 1061 genes, 1.3% | 15 out of 6473 background genes, 0.2% | 2.00E-07 | 0.00% | C1_01160C_A:C1_03830C_A:RRP6:C1_05360C_A:C1_06540C_A:C1_07960W_A:C1_09790C_A:C1_12350W_A:C2_06660W_A:C2_09160W_A:RAT1:C4_03740W_A:C7_03400C_A:CR_02550C_A       |
| 154   | rRNA modification                                        | 17 out of 1061 genes, 1.6% | 21 out of 6473 background genes, 0.3% | 2.06E-07 | 0.00% | C1_10620W_A:NEP1:C2_02120W_A:C2_04820W_A:RRP8:PUS7:C3_05860C_A:NOP1:C4_06950W_A:BUD23:SPB1:CR_01780W_A:CR_02030C_A:CR_04170W_A:CR_04240C_A:NOP10:CR_10260W_A    |
| 43633 | polyadenylation-dependent RNA catabolic process          | 15 out of 1061 genes, 1.4% | 17 out of 6473 background genes, 0.3% | 2.49E-07 | 0.00% | C1_01160C_A:C1_03830C_A:RRP6:C1_05360C_A:C1_06540C_A:C1_07960W_A:C1_09790C_A:C1_12350W_A:C2_06660W_A:C2_09160W_A:RAT1:C4_03740W_A:RRP42:C7_03400C_A:CR_02550C_A |
| 43634 | polyadenylation-dependent ncRNA catabolic process        | 15 out of 1061 genes, 1.4% | 17 out of 6473 background genes, 0.3% | 2.49E-07 | 0.00% | C1_01160C_A:C1_03830C_A:RRP6:C1_05360C_A:C1_06540C_A:C1_07960W_A:C1_09790C_A:C1_12350W_A:C2_06660W_A:C2_09160W_A:RAT1:C4_03740W_A:RRP42:C7_03400C_A:CR_02550C_A |



|       |                                                           |                            |                                        |          |       |                                                                                                                                                                                                                                                                                                                                                                                                                                                             |
|-------|-----------------------------------------------------------|----------------------------|----------------------------------------|----------|-------|-------------------------------------------------------------------------------------------------------------------------------------------------------------------------------------------------------------------------------------------------------------------------------------------------------------------------------------------------------------------------------------------------------------------------------------------------------------|
| 71029 | nuclear ncRNA surveillance                                | 15 out of 1061 genes, 1.4% | 17 out of 6473 background genes, 0.3%  | 2.49E-07 | 0.00% | C1_01160C_A:C1_03830C_A:RRP6:C1_05360C_A:C1_06540C_A:C1_07960W_A:C1_09790C_A:C1_12350W_A:C2_06660W_A:C2_09160W_A:RAT1:C4_03740W_A:RRP42:C7_03400C_A:CR_02550C_A                                                                                                                                                                                                                                                                                             |
| 71046 | nuclear polyadenylation-dependent ncRNA catabolic process | 15 out of 1061 genes, 1.4% | 17 out of 6473 background genes, 0.3%  | 2.49E-07 | 0.00% | C1_01160C_A:C1_03830C_A:RRP6:C1_05360C_A:C1_06540C_A:C1_07960W_A:C1_09790C_A:C1_12350W_A:C2_06660W_A:C2_09160W_A:RAT1:C4_03740W_A:RRP42:C7_03400C_A:CR_02550C_A                                                                                                                                                                                                                                                                                             |
| 375   | RNA splicing, via transesterification reactions           | 45 out of 1061 genes, 4.2% | 107 out of 6473 background genes, 1.7% | 3.30E-07 | 0.00% | C1_02090C_A:C1_02900C_A:C1_04120C_A:TRY2:GCR3:MSS116:C1_08890C_A:CEF1:BUD31:C1_10080W_A:C1_12630C_A:C1_12670C_A:C1_12750C_A:C1_13380W_A:C2_00200W_A:C2_00280C_A:C2_01820C_A:PRP39:PRP3:SUV3:SNU114:C2_06650C_A:CWC22:C2_10810W_A:C3_00100W_A:C3_00660W_A:C3_01560W_A:C3_03330C_A:C3_04380C_A:PRP5:C4_01280C_A:C4_05360C_A:C4_06410W_A:C5_00920W_A:C5_01930W_A:C5_03010W_A:C5_03400C_A:C6_00530C_A:PRP45:C6_02690C_A:NAM2:ISY1:CR_01700C_A:CR_03230W_A:PRP42 |

|       |                                         |                              |                                         |          |       |                                                                                                                                                                                                                                                                                                                                                                                                                                                                                                                                                                                                                                                                                                                                                                                                                                                                                                                                                                                                                                                                                                                                                                                                                                                                                                                                                                                                                                                                                                                                          |
|-------|-----------------------------------------|------------------------------|-----------------------------------------|----------|-------|------------------------------------------------------------------------------------------------------------------------------------------------------------------------------------------------------------------------------------------------------------------------------------------------------------------------------------------------------------------------------------------------------------------------------------------------------------------------------------------------------------------------------------------------------------------------------------------------------------------------------------------------------------------------------------------------------------------------------------------------------------------------------------------------------------------------------------------------------------------------------------------------------------------------------------------------------------------------------------------------------------------------------------------------------------------------------------------------------------------------------------------------------------------------------------------------------------------------------------------------------------------------------------------------------------------------------------------------------------------------------------------------------------------------------------------------------------------------------------------------------------------------------------------|
| 43933 | protein-containing complex organization | 169 out of 1061 genes, 15.9% | 665 out of 6473 background genes, 10.3% | 3.48E-07 | 0.00% | C1_02380C_A:C1_02900C_A:C1_03630W_A:C1_03790C_A:C1_04040C_A:C1_04120C_A:ERB1:NOP4:C1_04710C_A:C1_04970W_A:RRP6:C1_05360C_A:C1_05380C_A:RPS27A:C1_06760C_A:C1_07340W_A:ERD1:FUN12:JIP5:C1_09040C_A:CEF1:YTM1:C1_09620C_A:C1_09710C_A:RPA190:C1_10970W_A:TRP3:CSI2:C1_12440W_A:C1_12640W_A:C1_12750C_A:C1_12760W_A:C1_13010W_A:COX19:C1_14080W_A:C2_00200W_A:C2_00280C_A:C2_01070W_A:C2_01220W_A:PRP39:SAM37:UTP22:C2_02540W_A:C2_02930C_A:PRP3:SNU114:MAK5:C2_05160C_A:SGO1:RPF2:C2_05750W_A:C2_05830C_A:C2_06530W_A:C2_06650C_A:RPL11:C2_06950C_A:SMC2:CDC47:C2_09180W_A:C2_09290W_A:MED18:TAZ1:C2_10740C_A:C3_00100W_A:C3_00660W_A:BMS1:ARP9:C3_01560W_A:SCM3:C3_02020W_A:C3_02040C_A:C3_02350W_A:C3_02670W_A:SMC3:C3_03330C_A:HBR3:C3_04370C_A:MAK21:ARV1:C3_05160C_A:WOR2:QDR2:NOG1:DOT1:ISW2:C3_06370C_A:C3_06600C_A:PRP5:RLP24:C4_01130C_A:TOA2:HIT1:C4_02770C_A:NUP84:C4_04130W_A:C4_05010W_A:C4_05230C_A:OFD1:TUB4:C4_06410W_A:C4_06450W_A:RMT2:CYC3:SPB4:C5_01930W_A:C5_02010C_A:C5_02070C_A:TIF5:C5_02740W_A:C5_02780W_A:C5_03550W_A:C5_04720C_A:HAS1:GRF10:C5_05340W_A:C6_00560W_A:TOP1:CIC1:TIF3:C6_02230W_A:PRP45:C6_02690C_A:ARP4:SPB1:RPA135:DBP7:C7_01400C_A:FLU1:C7_01600W_A:C7_03400C_A:ISY1:ENP2:C7_03850W_A:UTP18:BUD22:PWP2:CR_00830W_A:DAL81:CR_01410C_A:CR_01550C_A:CR_01700C_A:MCM6:ARC1:CR_03340C_A:YVH1:SGD1:CR_03760W_A:CR_03940W_A:CR_04110W_A:CR_04170W_A:NOC2:CR_05550C_A:SDA1:HSP60:CR_06680C_A:CR_06740W_A:POL2:FUN30:CDC45:ASF1:TSR1:ELF1:SSF1:CR_09800C_A:CR_10180W_A:CR_10410C_A:CR_10470C_A:DRS1:LTV1 |
|-------|-----------------------------------------|------------------------------|-----------------------------------------|----------|-------|------------------------------------------------------------------------------------------------------------------------------------------------------------------------------------------------------------------------------------------------------------------------------------------------------------------------------------------------------------------------------------------------------------------------------------------------------------------------------------------------------------------------------------------------------------------------------------------------------------------------------------------------------------------------------------------------------------------------------------------------------------------------------------------------------------------------------------------------------------------------------------------------------------------------------------------------------------------------------------------------------------------------------------------------------------------------------------------------------------------------------------------------------------------------------------------------------------------------------------------------------------------------------------------------------------------------------------------------------------------------------------------------------------------------------------------------------------------------------------------------------------------------------------------|

|       |                                                          |                            |                                       |          |       |                                                                                                                                                                                                                                             |
|-------|----------------------------------------------------------|----------------------------|---------------------------------------|----------|-------|---------------------------------------------------------------------------------------------------------------------------------------------------------------------------------------------------------------------------------------------|
| 2E+06 | alpha-amino acid biosynthetic process                    | 39 out of 1061 genes, 3.7% | 87 out of 6473 background genes, 1.3% | 5.58E-07 | 0.00% | LEU4:CYS4:SNZ1:HOM6:LYS2:ARG2:SAM4:C1_11610C_A:SER33:TRP3:C2_00390C_A:MXR1:C2_01860C_A:PRS1:SER2:MET1:BAT21:IDP1:ILV1:SER1:C2_08530C_A:ASN1:LEU42:ILV2:PHA2:MET13:MET15:HOM3:TRP5:MET16:TRP4:THR4:C5_02820C_A:ARG4:TRP2:MET6:MET2:CYS3:PRO1 |
| 96    | sulfur amino acid metabolic process                      | 23 out of 1061 genes, 2.2% | 37 out of 6473 background genes, 0.6% | 6.92E-07 | 0.00% | CYS4:SNZ1:HOM6:C1_02970W_A:SAM4:SAM2:C1_11610C_A:MET3:C2_00390C_A:MXR1:C2_01860C_A:MET1:ECM17:MET13:MET15:HOM3:MET16:MET14:C5_02820C_A:MET6:MET2:CYS3:CR_09010C_A                                                                           |
| 1E+05 | tRNA surveillance                                        | 13 out of 1061 genes, 1.2% | 14 out of 6473 background genes, 0.2% | 1.15E-06 | 0.00% | C1_01160C_A:C1_03830C_A:RRP6:C1_05360C_A:C1_06540C_A:C1_09790C_A:C1_12350W_A:C2_06660W_A:C2_09160W_A:C4_03740W_A:RRP42:C7_03400C_A:CR_02550C_A                                                                                              |
| 71038 | nuclear polyadenylation-dependent tRNA catabolic process | 13 out of 1061 genes, 1.2% | 14 out of 6473 background genes, 0.2% | 1.15E-06 | 0.00% | C1_01160C_A:C1_03830C_A:RRP6:C1_05360C_A:C1_06540C_A:C1_09790C_A:C1_12350W_A:C2_06660W_A:C2_09160W_A:C4_03740W_A:RRP42:C7_03400C_A:CR_02550C_A                                                                                              |

|     |                                                                                      |                            |                                        |          |       |                                                                                                                                                                                                                                                                                                                                                                                                                                       |
|-----|--------------------------------------------------------------------------------------|----------------------------|----------------------------------------|----------|-------|---------------------------------------------------------------------------------------------------------------------------------------------------------------------------------------------------------------------------------------------------------------------------------------------------------------------------------------------------------------------------------------------------------------------------------------|
| 97  | sulfur amino acid biosynthetic process                                               | 19 out of 1061 genes, 1.8% | 28 out of 6473 background genes, 0.4%  | 2.69E-06 | 0.00% | CYS4:SNZ1:HOM6:C1_02970W_A:SAM4:C1_11610C_A:C2_00390C_A:MXR1:C2_01860C_A:MET1:ECM17:MET13:MET15:HOM3:MET16:C5_02820C_A:MET6:MET2:CYS3                                                                                                                                                                                                                                                                                                 |
| 377 | RNA splicing, via transesterification reactions with bulged adenosine as nucleophile | 42 out of 1061 genes, 4.0% | 102 out of 6473 background genes, 1.6% | 2.92E-06 | 0.00% | C1_02090C_A:C1_02900C_A:C1_04120C_A:TRY2:GCR3:MSS116:C1_08890C_A:CEF1:BUD31:C1_10080W_A:C1_12630C_A:C1_12670C_A:C1_12750C_A:C1_13380W_A:C2_00200W_A:C2_00280C_A:C2_01820C_A:PRP39:PRP3:SNU114:C2_06650C_A:CWC22:C2_10810W_A:C3_00100W_A:C3_00660W_A:C3_01560W_A:C3_03330C_A:C3_04380C_A:PRP5:C4_01280C_A:C4_06410W_A:C5_00920W_A:C5_01930W_A:C5_03010W_A:C5_03400C_A:C6_00530C_A:PRP45:C6_02690C_A:ISY1:CR_01700C_A:CR_03230W_A:PRP42 |

|       |                                    |                            |                                        |          |       |                                                                                                                                                                                                                                                                                                          |
|-------|------------------------------------|----------------------------|----------------------------------------|----------|-------|----------------------------------------------------------------------------------------------------------------------------------------------------------------------------------------------------------------------------------------------------------------------------------------------------------|
| 2E+06 | alpha-amino acid metabolic process | 48 out of 1061 genes, 4.5% | 125 out of 6473 background genes, 1.9% | 3.36E-06 | 0.00% | LEU4:CYS4:SNZ1:HOM6:LYS2:ARG2:SAM4:SAM2:C1_11610C_A:SER33:TRP3:C2_00390C_A:MXR1:C2_01860C_A:PRS1:SER2:MET1:BNA31:UGA1:BAT21:IDP1:ILV1:SER1:C2_08530C_A:ASN1:LEU42:ILV2:PHA2:MET13:C3_03470W_A:MET15:HOM3:TRP5:MET16:TRP4:IFG3:THR4:C5_02820C_A:SAH1:ARG4:TRP2:MET6:MET2:MIS11:URA2:CYS3:CR_09010C_A:PRO1 |
|-------|------------------------------------|----------------------------|----------------------------------------|----------|-------|----------------------------------------------------------------------------------------------------------------------------------------------------------------------------------------------------------------------------------------------------------------------------------------------------------|

|       |                             |                              |                                        |          |       |                                                                                                                                                                                                                                                                                                                                                                                                                                                                                                                                                                                                                                                                                                                                                                                                                                                                                                                                                                                                                                                                                                                                                                                                                                                                                                                                                                                                                    |
|-------|-----------------------------|------------------------------|----------------------------------------|----------|-------|--------------------------------------------------------------------------------------------------------------------------------------------------------------------------------------------------------------------------------------------------------------------------------------------------------------------------------------------------------------------------------------------------------------------------------------------------------------------------------------------------------------------------------------------------------------------------------------------------------------------------------------------------------------------------------------------------------------------------------------------------------------------------------------------------------------------------------------------------------------------------------------------------------------------------------------------------------------------------------------------------------------------------------------------------------------------------------------------------------------------------------------------------------------------------------------------------------------------------------------------------------------------------------------------------------------------------------------------------------------------------------------------------------------------|
| 22607 | cellular component assembly | 157 out of 1061 genes, 14.8% | 623 out of 6473 background genes, 9.6% | 3.37E-06 | 0.00% | RRS1:C1_02380C_A:C1_02900C_A:C1_03790C_A:C1_04040C_A:C1_04120C_A:ERB1:NOP4:C1_04710C_A:C1_04970W_A:RRP6:C1_05360C_A:RPS27A:C1_06760C_A:RIA1:ERD1:FUN12:JIP5:NAR1:C1_09040C_A:CEF1:C1_09620C_A:C1_09710C_A:RPA190:C1_10970W_A:TRP3:CSI2:C1_12440W_A:C1_12640W_A:C1_12750C_A:C1_12760W_A:C1_13010W_A:COX19:C1_14080W_A:C2_00200W_A:C2_00280C_A:C2_00810C_A:C2_00840W_A:C2_01070W_A:PRP39:SAM37:UTP22:C2_02540W_A:PRP3:SNU114:MAK5:C2_05160C_A:SGO1:RPF2:C2_05750W_A:C2_05830C_A:C2_06530W_A:C2_06650C_A:RPL11:C2_06950C_A:CDC47:C2_09180W_A:C2_09290W_A:MED18:TATZ1:C2_10740C_A:C3_00100W_A:C3_00660W_A:BMS1:ARP9:C3_01560W_A:SCM3:C3_02020W_A:C3_02040C_A:C3_02350W_A:C3_02670W_A:SMC3:C3_03330C_A:YAH1:HBR3:C3_04370C_A:MAK21:ARV1:C3_05160C_A:QDR2:NOG1:DOT1:C3_06370C_A:C3_06600C_A:PRP5:RPL24:TOA2:C4_02400C_A:HIT1:C4_02770C_A:C4_02880C_A:C4_04130W_A:C4_05010W_A:C4_05230C_A:TUB4:C4_06410W_A:RMT2:CYC3:SPB4:C5_01930W_A:C5_02010C_A:C5_02070C_A:TIF5:C5_02740W_A:C5_04720C_A:HAS1:C5_05340W_A:C6_00560W_A:CIC1:QDR3:TIF3:C6_02230W_A:PRP45:ARP4:SPB1:RPA135:DBP7:FLU1:C7_01600W_A:C7_03400C_A:ISY1:ENP2:C7_03850W_A:UTP18:BUD22:PWP2:CR_00830W_A:DAL81:CR_01410C_A:CR_01550C_A:CR_01700C_A:MCM6:ARC1:CR_03340C_A:YVH1:SGD1:CR_03940W_A:CR_04110W_A:CR_04170W_A:QDR1:NOC2:CR_05550C_A:SDA1:HSP60:CR_06680C_A:CR_06740W_A:CDC45:TSR1:MPS1:ELF1:SSF1:CR_09800C_A:CR_10180W_A:CR_10410C_A:CR_10470C_A:DRS1:LTV1 |
|-------|-----------------------------|------------------------------|----------------------------------------|----------|-------|--------------------------------------------------------------------------------------------------------------------------------------------------------------------------------------------------------------------------------------------------------------------------------------------------------------------------------------------------------------------------------------------------------------------------------------------------------------------------------------------------------------------------------------------------------------------------------------------------------------------------------------------------------------------------------------------------------------------------------------------------------------------------------------------------------------------------------------------------------------------------------------------------------------------------------------------------------------------------------------------------------------------------------------------------------------------------------------------------------------------------------------------------------------------------------------------------------------------------------------------------------------------------------------------------------------------------------------------------------------------------------------------------------------------|

|       |                       |                            |                                       |          |       |                                                                                                                                                                                                                                                                      |  |  |
|-------|-----------------------|----------------------------|---------------------------------------|----------|-------|----------------------------------------------------------------------------------------------------------------------------------------------------------------------------------------------------------------------------------------------------------------------|--|--|
| 30488 | tRNA methylation      | 16 out of 1061 genes, 1.5% | 21 out of 6473 background genes, 0.3% | 3.67E-06 | 0.00% | C1_01150C_A:ABP140:C1_04530C_A:C2_06480W_A:C3_05140C_A:TRM12:C3_07400W_A:C4_03730C_A:C4_03830W_A:C4_04810C_A:C6_04530C_A:C7_02340C_A:TRM1:CR_04160C_A:CR_04300W_A:CR_08940W_A                                                                                        |  |  |
| 33750 | ribosome localization | 33 out of 1061 genes, 3.1% | 72 out of 6473 background genes, 1.1% | 6.48E-06 | 0.00% | RRS1:C1_02450C_A:ARX1:C1_03630W_A:C1_04040C_A:C1_06530C_A:C1_12760W_A:C2_01220W_A:C2_05750W_A:C2_06850W_A:KRE30:MFG1:C3_02040C_A:SFP1:NOG1:C3_06150W_A:ZUO1:ECM1:C4_06210C_A:BUD23:RIX7:C6_02230W_A:RPL10A:MRT4:NOG2:C7_04150W_A:YVH1:MEX67:SDA1:RFX1:NMD3:SSB1:LTV1 |  |  |

|     |                                                                                                                                  |                            |                                       |          |       |                                                                                                                                                                                                                                                                      |
|-----|----------------------------------------------------------------------------------------------------------------------------------|----------------------------|---------------------------------------|----------|-------|----------------------------------------------------------------------------------------------------------------------------------------------------------------------------------------------------------------------------------------------------------------------|
| 54  | ribosomal subunit export from nucleus                                                                                            | 33 out of 1061 genes, 3.1% | 72 out of 6473 background genes, 1.1% | 6.48E-06 | 0.00% | RRS1:C1_02450C_A:ARX1:C1_03630W_A:C1_04040C_A:C1_06530C_A:C1_12760W_A:C2_01220W_A:C2_05750W_A:C2_06850W_A:KRE30:MFG1:C3_02040C_A:SFP1:NOG1:C3_06150W_A:ZUO1:ECM1:C4_06210C_A:BUD23:RIX7:C6_02230W_A:RPL10A:MRT4:NOG2:C7_04150W_A:YVH1:MEX67:SDA1:RFX1:NMD3:SSB1:LTV1 |
| 467 | exonucleolytic trimming to generate mature 3'-end of 5.8S rRNA from tricistronic rRNA transcript (SSU-rRNA, 5.8S rRNA, LSU-rRNA) | 14 out of 1061 genes, 1.3% | 17 out of 6473 background genes, 0.3% | 6.53E-06 | 0.00% | C1_01160C_A:C1_03830C_A:RRP6:C1_06540C_A:C1_07960W_A:C1_12350W_A:REX3:REX2:C2_06660W_A:C2_09160W_A:C4_03740W_A:RRP42:C7_03400C_A:CR_02550C_A                                                                                                                         |



|           |                           |                                     |                                                 |          |       |                                                                                                                                                                                                                                                                                                                                                                                                                                                                                                                                                                                                                                                                                                                                                          |
|-----------|---------------------------|-------------------------------------|-------------------------------------------------|----------|-------|----------------------------------------------------------------------------------------------------------------------------------------------------------------------------------------------------------------------------------------------------------------------------------------------------------------------------------------------------------------------------------------------------------------------------------------------------------------------------------------------------------------------------------------------------------------------------------------------------------------------------------------------------------------------------------------------------------------------------------------------------------|
| 1607<br>1 | mRNA<br>metabolic process | 73 out of<br>1061<br>genes,<br>6.9% | 231 out of<br>6473<br>background genes,<br>3.6% | 7.20E-06 | 0.00% | C1_02090C_A:C1_02900C_A:C1_03370W_A:RPP1:C1_03830C_A:C1_04120C_A:RRP6:TRY2:C1_05360C_A:C1_06540C_A:C1_07960W_A:GCR3:C1_08630W_A:C1_08890C_A:CEF1:C1_09790C_A:BUD31:C1_10080W_A:C1_10620W_A:C1_11900C_A:C1_11910W_A:C1_12350W_A:C1_12630C_A:C1_12670C_A:C1_12750C_A:RMP1:C1_13380W_A:C2_00200W_A:C2_00280C_A:C2_01820C_A:PRP39:PRP3:SNU114:C2_06650C_A:C2_06660W_A:CWC22:PUS7:C2_10810W_A:C3_00100W_A:C3_00660W_A:C3_01560W_A:C3_02840W_A:C3_03330C_A:C3_04380C_A:PRP5:C4_00740W_A:RAT1:C4_01280C_A:C4_03740W_A:C4_05360C_A:OFD1:C4_06410W_A:C5_00920W_A:PUS4:C5_01610W_A:C5_01930W_A:C5_03010W_A:C5_03400C_A:C6_00530C_A:C6_02350C_A:PRP45:C6_02690C_A:MRT4:POP4:C7_03400C_A:ISY1:CR_01700C_A:CR_02550C_A:CR_03200C_A:CR_03230W_A:PRP42:CR_04240C_A:POP3 |
| 1607<br>8 | tRNA<br>catabolic process | 13 out of<br>1061<br>genes,<br>1.2% | 15 out of<br>6473<br>background genes,<br>0.2%  | 7.34E-06 | 0.00% | C1_01160C_A:C1_03830C_A:RRP6:C1_05360C_A:C1_06540C_A:C1_09790C_A:C1_12350W_A:C2_06660W_A:C2_09160W_A:C4_03740W_A:RRP42:C7_03400C_A:CR_02550C_A                                                                                                                                                                                                                                                                                                                                                                                                                                                                                                                                                                                                           |

|       |                                |                            |                                        |          |       |                                                                                                                                                                                                                                                                                                                                                                                                                                |
|-------|--------------------------------|----------------------------|----------------------------------------|----------|-------|--------------------------------------------------------------------------------------------------------------------------------------------------------------------------------------------------------------------------------------------------------------------------------------------------------------------------------------------------------------------------------------------------------------------------------|
| 398   | mRNA splicing, via spliceosome | 41 out of 1061 genes, 3.9% | 101 out of 6473 background genes, 1.6% | 7.59E-06 | 0.00% | C1_02090C_A:C1_02900C_A:C1_04120C_A:TRY2:GCR3:C1_08890C_A:CEF1:BUD31:C1_10080W_A:C1_12630C_A:C1_12670C_A:C1_12750C_A:C1_13380W_A:C2_00200W_A:C2_00280C_A:C2_01820C_A:PRP39:PRP3:SNU114:C2_06650C_A:CWC22:C2_10810W_A:C3_00100W_A:C3_00660W_A:C3_01560W_A:C3_03330C_A:C3_04380C_A:PRP5:C4_01280C_A:C4_06410W_A:C5_00920W_A:C5_01930W_A:C5_03010W_A:C5_03400C_A:C6_00530C_A:PRP45:C6_02690C_A:ISY1:CR_01700C_A:CR_03230W_A:PRP42 |
| 71027 | nuclear RNA surveillance       | 16 out of 1061 genes, 1.5% | 22 out of 6473 background genes, 0.3%  | 1.14E-05 | 0.00% | C1_01160C_A:C1_03830C_A:RRP6:C1_05360C_A:C1_06540C_A:C1_07960W_A:C1_09790C_A:C1_12350W_A:C2_06660W_A:C2_09160W_A:RAT1:C4_03740W_A:RRP42:C5_04910W_A:C7_03400C_A:CR_02550C_A                                                                                                                                                                                                                                                    |
| 31125 | rRNA 3'-end processing         | 15 out of 1061 genes, 1.4% | 20 out of 6473 background genes, 0.3%  | 1.73E-05 | 0.00% | C1_01160C_A:C1_03830C_A:RRP6:C1_06540C_A:C1_07960W_A:C1_12350W_A:REX3:REX2:C2_06660W_A:C2_09160W_A:C4_03740W_A:RRP42:C7_03400C_A:CR_02550C_A:TSR1                                                                                                                                                                                                                                                                              |

|       |                                 |                            |                                       |          |       |                                                                                                                                                                             |
|-------|---------------------------------|----------------------------|---------------------------------------|----------|-------|-----------------------------------------------------------------------------------------------------------------------------------------------------------------------------|
| 71025 | RNA surveillance                | 16 out of 1061 genes, 1.5% | 23 out of 6473 background genes, 0.4% | 3.18E-05 | 0.00% | C1_01160C_A:C1_03830C_A:RRP6:C1_05360C_A:C1_06540C_A:C1_07960W_A:C1_09790C_A:C1_12350W_A:C2_06660W_A:C2_09160W_A:RAT1:C4_03740W_A:RRP42:C5_04910W_A:C7_03400C_A:CR_02550C_A |
| 6555  | methionine metabolic process    | 17 out of 1061 genes, 1.6% | 26 out of 6473 background genes, 0.4% | 4.70E-05 | 0.00% | CYS4:HOM6:SAM4:SAM2:C1_11610C_A:C2_00390C_A:MXR1:C2_01860C_A:MET1:MET13:MET15:HOM3:MET16:C5_02820C_A:MET6:MET2:CYS3                                                         |
| 9086  | methionine biosynthetic process | 16 out of 1061 genes, 1.5% | 24 out of 6473 background genes, 0.4% | 8.11E-05 | 0.00% | CYS4:HOM6:SAM4:C1_11610C_A:C2_00390C_A:MXR1:C2_01860C_A:MET1:MET13:MET15:HOM3:MET16:C5_02820C_A:MET6:MET2:CYS3                                                              |

|       |                                   |                            |                                        |         |       |                                                                                                                                                                                                                                                                                                                                                                                                                                                                                                                                                                                                                                       |
|-------|-----------------------------------|----------------------------|----------------------------------------|---------|-------|---------------------------------------------------------------------------------------------------------------------------------------------------------------------------------------------------------------------------------------------------------------------------------------------------------------------------------------------------------------------------------------------------------------------------------------------------------------------------------------------------------------------------------------------------------------------------------------------------------------------------------------|
| 19752 | carboxylic acid metabolic process | 95 out of 1061 genes, 9.0% | 349 out of 6473 background genes, 5.4% | 0.00016 | 0.00% | RIM8:LEU4:C1_00510W_A:SPE1:HMT1:C1_01530C_A:CYS4:SNZ1:HOM6:LYS2:C1_02970W_A:ARG2:ARO4:C1_05990C_A:CAT8:SAM4:SAM2:C1_11610C_A:SER33:TRP3:WRS1:FEN1:C1_13330C_A:MET3:C2_00390C_A:MXR1:C2_01860C_A:ARO3:PRS1:SER2:MET1:BNA31:UGA1:BAT21:C2_04340C_A:IDP1:C2_05980C_A:ECM17:ILV1:SER1:VAS1:SPE3:DQD1:C2_07410W_A:C2_08530C_A:ASN1:C2_09310C_A:LEU42:ILV2:PHA2:MET13:C3_03470W_A:BAT22:HIS4:MET15:HIS5:ARO1:AAT22:ILV6:HOM3:TRP5:MET16:TRP4:MET14:IFG3:SPE2:THR4:MSW1:C5_02820C_A:SAH1:MSM1:HIS1:ILV3:NAM2:PAD1:ILS1:ARG4:HIS7:ADE1:PRS:TRP2:MET6:CDC60:MET2:ERG25:PAN6:ARC1:CR_03110W_A:CR_03400W_A:MIS11:URA2:ARO2:CYS3:CR_09010C_A:PRO1 |
| 46112 | nucleobase biosynthetic process   | 15 out of 1061 genes, 1.4% | 23 out of 6473 background genes, 0.4%  | 0.00033 | 0.00% | ADE4:ADE5,7:APT1:PRS1:SER1:AAH1:URA3:ADE2:BAS1:URA7:GRF10:ADE1:MET6:MIS11:URA2                                                                                                                                                                                                                                                                                                                                                                                                                                                                                                                                                        |

|       |                                         |                            |                                       |         |       |                                                                                                                                                                                                                                                                                        |
|-------|-----------------------------------------|----------------------------|---------------------------------------|---------|-------|----------------------------------------------------------------------------------------------------------------------------------------------------------------------------------------------------------------------------------------------------------------------------------------|
| 16073 | snRNA metabolic process                 | 16 out of 1061 genes, 1.5% | 26 out of 6473 background genes, 0.4% | 0.00042 | 0.00% | RRP6:C1_05360C_A:C1_07960W_A:C1_09790C_A:C1_10620W_A:GAR1:REX3:REX2:C2_09160W_A:PUS7:C4_03740W_A:C6_02350C_A:C7_03400C_A:CR_02550C_A:CR_04110W_A:NOP10                                                                                                                                 |
| 31503 | protein-containing complex localization | 35 out of 1061 genes, 3.3% | 92 out of 6473 background genes, 1.4% | 0.00068 | 0.00% | RRS1:C1_02450C_A:ARX1:C1_03630W_A:C1_04040C_A:C1_06530C_A:C1_09840C_A:C1_12760W_A:C2_01220W_A:C2_05750W_A:C2_06850W_A:KRE30:MFG1:C3_02040C_A:SFP1:NOG1:C3_06150W_A:ZUO1:ECM1:C4_06210C_A:BUD23:RIX7:CDC14:C6_02230W_A:RPL10A:MRT4:NOG2:C7_04150W_A:YVH1:MEX67:SDA1:RFX1:NMD3:SSB1:LTV1 |

|      |                                                  |                            |                                        |         |       |                                                                                                                                                                                                                                                                                                                                                                                                                                                                                                                               |
|------|--------------------------------------------------|----------------------------|----------------------------------------|---------|-------|-------------------------------------------------------------------------------------------------------------------------------------------------------------------------------------------------------------------------------------------------------------------------------------------------------------------------------------------------------------------------------------------------------------------------------------------------------------------------------------------------------------------------------|
| 6397 | mRNA processing                                  | 49 out of 1061 genes, 4.6% | 149 out of 6473 background genes, 2.3% | 0.00071 | 0.00% | C1_02090C_A:C1_02900C_A:C1_03370W_A:C1_03830C_A:C1_04120C_A:TRY2:C1_06540C_A:GCR3:C1_08630W_A:C1_08890C_A:CEF1:BUD31:C1_10080W_A:C1_11910W_A:C1_12350W_A:C1_12630C_A:C1_12670C_A:C1_12750C_A:C1_13380W_A:C2_00200W_A:C2_00280C_A:C2_01820C_A:PRP39:PRP3:SNU114:C2_06650C_A:WC22:C2_10810W_A:C3_00100W_A:C3_00660W_A:C3_01560W_A:C3_03330C_A:C3_04380C_A:PRP5:C4_01280C_A:C4_05360C_A:C4_06410W_A:C5_00920W_A:C5_01930W_A:C5_03010W_A:C5_03400C_A:C6_00530C_A:PRP45:C6_02690C_A:C7_03400C_A:ISY1:CR_01700C_A:CR_03230W_A:PRP42 |
| 9067 | aspartate family amino acid biosynthetic process | 20 out of 1061 genes, 1.9% | 39 out of 6473 background genes, 0.6%  | 0.00082 | 0.00% | CYS4:HOM6:LYS2:SAM4:C1_11610C_A:C2_00390C_A:MXR1:C2_01860C_A:MET1:C2_08530C_A:ASN1:MET13:MET15:HOM3:MET16:THR4:C5_02820C_A:MET6:MET2:CYS3                                                                                                                                                                                                                                                                                                                                                                                     |
| 9113 | purine nucleobase biosynthetic process           | 11 out of 1061 genes, 1.0% | 14 out of 6473 background genes, 0.2%  | 0.00082 | 0.00% | ADE4:ADE5,7:APT1:SER1:AAH1:ADE2:BAS1:GRF10:ADE1:MET6:MIS11                                                                                                                                                                                                                                                                                                                                                                                                                                                                    |

|           |                                 |                                     |                                                    |         |       |                                                                                                                                                                                                                                                                                                                                                                                                                                                                                                                                                                                                                                       |
|-----------|---------------------------------|-------------------------------------|----------------------------------------------------|---------|-------|---------------------------------------------------------------------------------------------------------------------------------------------------------------------------------------------------------------------------------------------------------------------------------------------------------------------------------------------------------------------------------------------------------------------------------------------------------------------------------------------------------------------------------------------------------------------------------------------------------------------------------------|
| 4343<br>6 | oxoacid<br>metabolic<br>process | 95 out of<br>1061<br>genes,<br>9.0% | 361 out of<br>6473<br>background<br>genes,<br>5.6% | 0.00091 | 0.00% | RIM8:LEU4:C1_00510W_A:SPE1:HMT1:C1_01530C_A:CYS4:SNZ1:HOM6:LYS2:C1_02970W_A:ARG2:ARO4:C1_05990C_A:CAT8:SAM4:SAM2:C1_11610C_A:SER33:TRP3:WRS1:FEN1:C1_13330C_A:MET3:C2_00390C_A:MXR1:C2_01860C_A:ARO3:PRS1:SER2:MET1:BNA31:UGA1:BAT21:C2_04340C_A:IDP1:C2_05980C_A:ECM17:ILV1:SER1:VAS1:SPE3:DQD1:C2_07410W_A:C2_08530C_A:ASN1:C2_09310C_A:LEU42:ILV2:PHA2:MET13:C3_03470W_A:BAT22:HIS4:MET15:HIS5:ARO1:AAT22:ILV6:HOM3:TRP5:MET16:TRP4:MET14:IFG3:SPE2:THR4:MSW1:C5_02820C_A:SAH1:MSM1:HIS1:ILV3:NAM2:PAD1:ILS1:ARG4:HIS7:ADE1:PRS:TRP2:MET6:CDC60:MET2:ERG25:PAN6:ARC1:CR_03110W_A:CR_03400W_A:MIS11:URA2:ARO2:CYS3:CR_09010C_A:PRO1 |
|-----------|---------------------------------|-------------------------------------|----------------------------------------------------|---------|-------|---------------------------------------------------------------------------------------------------------------------------------------------------------------------------------------------------------------------------------------------------------------------------------------------------------------------------------------------------------------------------------------------------------------------------------------------------------------------------------------------------------------------------------------------------------------------------------------------------------------------------------------|

|      |                                               |                            |                                        |         |       |                                                                                                                                                                                                                                                                                                                                                                                                                                                                                                                                                                                                                                       |
|------|-----------------------------------------------|----------------------------|----------------------------------------|---------|-------|---------------------------------------------------------------------------------------------------------------------------------------------------------------------------------------------------------------------------------------------------------------------------------------------------------------------------------------------------------------------------------------------------------------------------------------------------------------------------------------------------------------------------------------------------------------------------------------------------------------------------------------|
| 6082 | organic acid metabolic process                | 95 out of 1061 genes, 9.0% | 362 out of 6473 background genes, 5.6% | 0.00104 | 0.00% | RIM8:LEU4:C1_00510W_A:SPE1:HMT1:C1_01530C_A:CYS4:SNZ1:HOM6:LYS2:C1_02970W_A:ARG2:ARO4:C1_05990C_A:CAT8:SAM4:SAM2:C1_11610C_A:SER33:TRP3:WRS1:FEN1:C1_13330C_A:MET3:C2_00390C_A:MXR1:C2_01860C_A:ARO3:PRS1:SER2:MET1:BNA31:UGA1:BAT21:C2_04340C_A:IDP1:C2_05980C_A:ECM17:ILV1:SER1:VAS1:SPE3:DQD1:C2_07410W_A:C2_08530C_A:ASN1:C2_09310C_A:LEU42:ILV2:PHA2:MET13:C3_03470W_A:BAT22:HIS4:MET15:HIS5:ARO1:AAT22:ILV6:HOM3:TRP5:MET16:TRP4:MET14:IFG3:SPE2:THR4:MSW1:C5_02820C_A:SAH1:MSM1:HIS1:ILV3:NAM2:PAD1:ILS1:ARG4:HIS7:ADE1:PRS:TRP2:MET6:CDC60:MET2:ERG25:PAN6:ARC1:CR_03110W_A:CR_03400W_A:MIS11:URA2:ARO2:CYS3:CR_09010C_A:PRO1 |
| 9066 | aspartate family amino acid metabolic process | 22 out of 1061 genes, 2.1% | 46 out of 6473 background genes, 0.7%  | 0.00105 | 0.00% | CYS4:HOM6:LYS2:SAM4:SAM2:C1_11610C_A:C2_00390C_A:MXR1:C2_01860C_A:MET1:ILV1:C2_08530C_A:ASN1:MET13:MET15:HOM3:MET16:THR4:C5_02820C_A:MET6:MET2:CYS3                                                                                                                                                                                                                                                                                                                                                                                                                                                                                   |



|       |                                     |                            |                                       |         |       |                                                                                                                                                                                    |
|-------|-------------------------------------|----------------------------|---------------------------------------|---------|-------|------------------------------------------------------------------------------------------------------------------------------------------------------------------------------------|
| 31167 | rRNA methylation                    | 10 out of 1061 genes, 0.9% | 12 out of 6473 background genes, 0.2% | 0.00108 | 0.00% | NEP1:RRP8:C3_05860C_A:NOP1:BUD23:SPB1:CR_01780W_A:CR_02030C_A:CR_04170W_A:CR_10260W_A                                                                                              |
| 42401 | biogenic amine biosynthetic process | 9 out of 1061 genes, 0.8%  | 10 out of 6473 background genes, 0.2% | 0.00118 | 0.00% | SPE1:TRP3:C1_13330C_A:PRS1:SPE3:TRP5:TRP4:SPE2:TRP2                                                                                                                                |
| 46083 | adenine metabolic process           | 9 out of 1061 genes, 0.8%  | 10 out of 6473 background genes, 0.2% | 0.00118 | 0.00% | ADE4:ADE5,7:APT1:AAH1:ADE2:BAS1:GRF10:ADE1:MET6                                                                                                                                    |
| 9309  | amine biosynthetic process          | 9 out of 1061 genes, 0.8%  | 10 out of 6473 background genes, 0.2% | 0.00118 | 0.00% | SPE1:TRP3:C1_13330C_A:PRS1:SPE3:TRP5:TRP4:SPE2:TRP2                                                                                                                                |
| 16074 | sno(s)RNA metabolic process         | 19 out of 1061 genes, 1.8% | 37 out of 6473 background genes, 0.6% | 0.00155 | 0.00% | RPP1:RRP6:C1_05360C_A:C1_07960W_A:C1_09790C_A:C1_10620W_A:C2_00280C_A:TBF1:C3_02840W_A:C4_00740W_A:RAT1:C4_03740W_A:C4_04520W_A:NOP1:POP4:C7_03400C_A:CR_02550C_A:CR_03200C_A:POP3 |

|           |                                                         |                                     |                                                   |         |       |                                                                                                                                                                                                                     |
|-----------|---------------------------------------------------------|-------------------------------------|---------------------------------------------------|---------|-------|---------------------------------------------------------------------------------------------------------------------------------------------------------------------------------------------------------------------|
| 9878<br>1 | ncRNA<br>transcription                                  | 25 out of<br>1061<br>genes,<br>2.4% | 58 out of<br>6473<br>background<br>genes,<br>0.9% | 0.00213 | 0.00% | RPA190:C1_10920W_A:C1_12820C_A:C2_01070W_A:C2_02630W_A:TBF1:PZF1:RPC40:FHL1:RPC11:RPC53:C4_07060W_A:RPO26:TOP1:C6_03210C_A:RPA135:C7_01210C_A:C7_01400C_A:CR_01950W_A:RPC31:CR_02890C_A:RPB8:CR_05550C_A:RRN11:PIF1 |
| 55        | ribosomal large<br>subunit<br>export<br>from<br>nucleus | 24 out of<br>1061<br>genes,<br>2.3% | 55 out of<br>6473<br>background<br>genes,<br>0.8% | 0.00265 | 0.00% | RRS1:C1_02450C_A:ARX1:C1_03630W_A:C1_06530C_A:C1_12760W_A:C2_01220W_A:C2_05750W_A:MFG1:C3_02040C_A:SFP1:C3_06150W_A:ECM1:C4_06210C_A:RIX7:RPL10A:MRT4:NOG2:C7_04150W_A:YVH1:MEX67:SDA1:RFX1:NMD3                    |
| 4314<br>4 | sno(s)RNA<br>processing                                 | 17 out of<br>1061<br>genes,<br>1.6% | 32 out of<br>6473<br>background<br>genes,<br>0.5% | 0.00317 | 0.00% | RPP1:RRP6:C1_05360C_A:C1_07960W_A:C1_10620W_A:C2_00280C_A:C3_02840W_A:C4_00740W_A:RAT1:C4_03740W_A:C4_04520W_A:NOP1:POP4:C7_03400C_A:CR_02550C_A:CR_03200C_A:POP3                                                   |
| 4279<br>7 | tRNA<br>transcription by<br>RNA<br>polymerase III       | 12 out of<br>1061<br>genes,<br>1.1% | 18 out of<br>6473<br>background<br>genes,<br>0.3% | 0.00419 | 0.00% | C1_12820C_A:RPC40:RPC11:RPC53:C4_07060W_A:RPO26:C6_03210C_A:C7_01210C_A:RPC31:CR_02890C_A:RPB8:CR_05550C_A                                                                                                          |

|       |                                              |                            |                                       |         |       |                                                                                                                                                                 |
|-------|----------------------------------------------|----------------------------|---------------------------------------|---------|-------|-----------------------------------------------------------------------------------------------------------------------------------------------------------------|
| 9304  | tRNA transcription                           | 12 out of 1061 genes, 1.1% | 18 out of 6473 background genes, 0.3% | 0.00419 | 0.00% | C1_12820C_A:RPC40:RPC11:RPC53:C4_07060W_A:RPO26:C6_03210C_A:C7_01210C_A:RPC31:CR_02890C_A:RPB8:CR_05550C_A                                                      |
| 18202 | peptidyl-histidine modification              | 9 out of 1061 genes, 0.8%  | 11 out of 6473 background genes, 0.2% | 0.00556 | 0.00% | C1_09040C_A:C2_01060C_A:C2_03830W_A:KTI11:C2_05840W_A:C2_07920W_A:C4_00690C_A:C5_03640W_A:C5_03700C_A                                                           |
| 16075 | rRNA catabolic process                       | 15 out of 1061 genes, 1.4% | 27 out of 6473 background genes, 0.4% | 0.00618 | 0.02% | C1_01160C_A:C1_03830C_A:RRP6:C1_05360C_A:C1_06540C_A:C1_07960W_A:C1_09790C_A:C1_12350W_A:C2_06660W_A:C2_09160W_A:RAT1:C4_03740W_A:RRP42:C7_03400C_A:CR_02550C_A |
| 17183 | protein histidyl modification to diphthamide | 8 out of 1061 genes, 0.8%  | 9 out of 6473 background genes, 0.1%  | 0.00655 | 0.02% | C2_01060C_A:C2_03830W_A:KTI11:C2_05840W_A:C2_07920W_A:C4_00690C_A:C5_03640W_A:C5_03700C_A                                                                       |
| 9112  | nucleobase metabolic process                 | 16 out of 1061 genes, 1.5% | 31 out of 6473 background genes, 0.5% | 0.0105  | 0.02% | ADE4:ADE5,7:APT1:PRS1:SER1:AAH1:URA3:ADE2:BAS1:URA7:GRF10:FCA1:ADE1:MET6:MIS11:URA2                                                                             |

|       |                       |                            |                                        |         |       |                                                                                                                                                                                                                                                                                                                                                                              |
|-------|-----------------------|----------------------------|----------------------------------------|---------|-------|------------------------------------------------------------------------------------------------------------------------------------------------------------------------------------------------------------------------------------------------------------------------------------------------------------------------------------------------------------------------------|
| 51168 | nuclear export        | 46 out of 1061 genes, 4.3% | 150 out of 6473 background genes, 2.3% | 0.01375 | 0.02% | RRS1:HMT1:C1_02450C_A:ARX1:C1_03630W_A:C1_04040C_A:C1_04120C_A:C1_06530C_A:C1_07690C_A:C1_11910W_A:C1_12760W_A:C2_01220W_A:UTP22:C2_05750W_A:C2_06850W_A:KRE30:RPS10:MFG1:UTP8:C3_01520C_A:C3_02040C_A:RPS15:SFP1:NOG1:C3_06150W_A:ZUO1:NUP84:ECM1:C4_06210C_A:BUD23:RIX7:C5_03550W_A:C6_02230W_A:RPL10A:MRT4:NOG2:ENP1:C7_04150W_A:YVH1:MEX67:SDA1:RFX1:NMD3:SSB1:ELF1:LTV1 |
| 6401  | RNA catabolic process | 36 out of 1061 genes, 3.4% | 108 out of 6473 background genes, 1.7% | 0.01722 | 0.02% | C1_01160C_A:RPP1:C1_03830C_A:RRP6:C1_05360C_A:C1_06540C_A:C1_07960W_A:GCR3:C1_09790C_A:PET127:C1_11900C_A:C1_12350W_A:RMP1:SUV3:C2_06660W_A:MSU1:C2_09160W_A:C2_09180W_A:C3_02840W_A:C4_00740W_A:RAT1:C4_03740W_A:RRP42:OFD1:C5_00280C_A:C5_03400C_A:HYS2:C5_04910W_A:MRT4:POP4:C7_03400C_A:CR_02550C_A:CR_03200C_A:CR_04560C_A:PIF1:POP3                                    |

|       |                                                  |                            |                                        |         |       |                                                                                                                                                                                                                                                                                                                                                                      |
|-------|--------------------------------------------------|----------------------------|----------------------------------------|---------|-------|----------------------------------------------------------------------------------------------------------------------------------------------------------------------------------------------------------------------------------------------------------------------------------------------------------------------------------------------------------------------|
| 34655 | nucleobase-containing compound catabolic process | 40 out of 1061 genes, 3.8% | 125 out of 6473 background genes, 1.9% | 0.0173  | 0.02% | C1_01160C_A:RPP1:C1_03830C_A:RRP6:C1_05360C_A:C1_06540C_A:C1_07960W_A:GCR3:C1_09790C_A:PET127:C1_11900C_A:C1_12350W_A:RMP1:SUV3:C2_06660W_A:MSU1:C2_09160W_A:C2_09180W_A:C3_02840W_A:C4_00740W_A:RAT1:C4_03740W_A:RRP42:OFD1:C5_00280C_A:PDE1:C5_03400C_A:HAM1:SAH1:HYS2:C5_04910W_A:MRT4:POP4:C7_03400C_A:CR_01550C_A:CR_02550C_A:CR_03200C_A:CR_04560C_A:PIF1:POP3 |
| 1522  | pseudouridine synthesis                          | 9 out of 1061 genes, 0.8%  | 12 out of 6473 background genes, 0.2%  | 0.019   | 0.03% | C1_10620W_A:GAR1:PUS7:C4_06950W_A:PUS4:C5_01610W_A:C6_02350C_A:CR_04110W_A:NOP10                                                                                                                                                                                                                                                                                     |
| 9092  | homoserine metabolic process                     | 9 out of 1061 genes, 0.8%  | 12 out of 6473 background genes, 0.2%  | 0.019   | 0.03% | CYS4:HOM6:C2_00390C_A:MET15:HOM3:MET6:MET2:CYS3:CR_09010C_A                                                                                                                                                                                                                                                                                                          |
| 33967 | box C/D RNA metabolic process                    | 8 out of 1061 genes, 0.8%  | 10 out of 6473 background genes, 0.2%  | 0.02805 | 0.03% | RPP1:C3_02840W_A:C4_00740W_A:C4_04520W_A:NOP1:POP4:CR_03200C_A:POP3                                                                                                                                                                                                                                                                                                  |

|       |                                                                 |                            |                                       |         |       |                                                                                                                                                                 |
|-------|-----------------------------------------------------------------|----------------------------|---------------------------------------|---------|-------|-----------------------------------------------------------------------------------------------------------------------------------------------------------------|
| 34963 | box C/D RNA processing                                          | 8 out of 1061 genes, 0.8%  | 10 out of 6473 background genes, 0.2% | 0.02805 | 0.03% | RPP1:C3_02840W_A:C4_00740W_A:C4_04520W_A:NOP1:POP4:CR_03200C_A:POP3                                                                                             |
| 34661 | ncRNA catabolic process                                         | 15 out of 1061 genes, 1.4% | 30 out of 6473 background genes, 0.5% | 0.03381 | 0.03% | C1_01160C_A:C1_03830C_A:RRP6:C1_05360C_A:C1_06540C_A:C1_07960W_A:C1_09790C_A:C1_12350W_A:C2_06660W_A:C2_09160W_A:RAT1:C4_03740W_A:RRP42:C7_03400C_A:CR_02550C_A |
| 294   | nuclear-transcribed mRNA catabolic process, RNase MRP-dependent | 7 out of 1061 genes, 0.7%  | 8 out of 6473 background genes, 0.1%  | 0.03585 | 0.03% | RPP1:RMP1:C3_02840W_A:C4_00740W_A:POP4:CR_03200C_A:POP3                                                                                                         |
| 46084 | adenine biosynthetic process                                    | 7 out of 1061 genes, 0.7%  | 8 out of 6473 background genes, 0.1%  | 0.03585 | 0.03% | ADE5,7:APT1:ADE2:BAS1:GRF10:ADE1:MET6                                                                                                                           |
| 9069  | serine family amino acid metabolic process                      | 16 out of 1061 genes, 1.5% | 34 out of 6473 background genes, 0.5% | 0.04716 | 0.05% | CYS4:SNZ1:HOM6:C1_11610C_A:SER33:C2_00390C_A:SER2:SER1:MET15:HOM3:MET16:MET6:MET2:MIS11:CYS3:CR_09010C_A                                                        |

|       |                                      |                            |                                       |         |       |                                                                                                                                                                         |
|-------|--------------------------------------|----------------------------|---------------------------------------|---------|-------|-------------------------------------------------------------------------------------------------------------------------------------------------------------------------|
| 71265 | L-methionine biosynthetic process    | 9 out of 1061 genes, 0.8%  | 13 out of 6473 background genes, 0.2% | 0.05275 | 0.05% | CYS4:SAM4:C2_00390C_A:MXR1:C2_01860C_A:MET15:C5_02820C_A:MET6:MET2                                                                                                      |
| 963   | mitochondrial RNA processing         | 9 out of 1061 genes, 0.8%  | 13 out of 6473 background genes, 0.2% | 0.05275 | 0.05% | MSS116:PET127:C1_14330W_A:C2_00820W_A:SUV3:C4_00810C_A:C4_03730C_A:C4_05360C_A:C6_03440W_A                                                                              |
| 44272 | sulfur compound biosynthetic process | 23 out of 1061 genes, 2.2% | 60 out of 6473 background genes, 0.9% | 0.05774 | 0.05% | RIM8:CYS4:SNZ1:HOM6:C1_02970W_A:SAM4:SAM2:C1_11610C_A:C2_00390C_A:MXR1:C2_01860C_A:MET1:ECM17:MET13:MET15:HOM3:MET16:C5_02820C_A:C5_03840W_A:C7_03590C_A:MET6:MET2:CYS3 |

|       |                   |                            |                                        |         |       |                                                                                                                                                                                                                                                                                                                                                                                                                                                                |
|-------|-------------------|----------------------------|----------------------------------------|---------|-------|----------------------------------------------------------------------------------------------------------------------------------------------------------------------------------------------------------------------------------------------------------------------------------------------------------------------------------------------------------------------------------------------------------------------------------------------------------------|
| 51169 | nuclear transport | 54 out of 1061 genes, 5.1% | 195 out of 6473 background genes, 3.0% | 0.06191 | 0.05% | RRS1:HMT1:C1_02450C_A:ARX1:C1_03630W_A:C1_04040C_A:C1_04120C_A:REI1:C1_05630C_A:C1_06530C_A:C1_07690C_A:C1_11910W_A:C1_12760W_A:C2_01220W_A:UTP22:C2_05270W_A:C2_05750W_A:C2_06850W_A:KRE30:RPS10:MFG1:UTP8:C3_01520C_A:C3_02040C_A:RPS15:SFP1:NOG1:C3_06150W_A:NMD5:ZUO1:NUP84:ECM1:C4_06210C_A:C4_06790W_A:BUD23:RIX7:C5_03550W_A:C6_02230W_A:RPL10A:MRT4:NOG2:C7_02460C_A:ENP1:C7_04150W_A:YVH1:MEX67:SDA1:RFX1:NMD3:SSB1:CR_08330W_A:CR_08500W_A:ELF1:LTV1 |
|-------|-------------------|----------------------------|----------------------------------------|---------|-------|----------------------------------------------------------------------------------------------------------------------------------------------------------------------------------------------------------------------------------------------------------------------------------------------------------------------------------------------------------------------------------------------------------------------------------------------------------------|



|      |                                               |                            |                                        |         |       |                                                                                                                                                                                                                                                                                                                                                                                                                                                                |
|------|-----------------------------------------------|----------------------------|----------------------------------------|---------|-------|----------------------------------------------------------------------------------------------------------------------------------------------------------------------------------------------------------------------------------------------------------------------------------------------------------------------------------------------------------------------------------------------------------------------------------------------------------------|
| 6913 | nucleocytoplasmic transport                   | 54 out of 1061 genes, 5.1% | 195 out of 6473 background genes, 3.0% | 0.06191 | 0.05% | RRS1:HMT1:C1_02450C_A:ARX1:C1_03630W_A:C1_04040C_A:C1_04120C_A:REI1:C1_05630C_A:C1_06530C_A:C1_07690C_A:C1_11910W_A:C1_12760W_A:C2_01220W_A:UTP22:C2_05270W_A:C2_05750W_A:C2_06850W_A:KRE30:RPS10:MFG1:UTP8:C3_01520C_A:C3_02040C_A:RPS15:SFP1:NOG1:C3_06150W_A:NMD5:ZUO1:NUP84:ECM1:C4_06210C_A:C4_06790W_A:BUD23:RIX7:C5_03550W_A:C6_02230W_A:RPL10A:MRT4:NOG2:C7_02460C_A:ENP1:C7_04150W_A:YVH1:MEX67:SDA1:RFX1:NMD3:SSB1:CR_08330W_A:CR_08500W_A:ELF1:LTV1 |
| 959  | mitochondrial RNA metabolic process           | 13 out of 1061 genes, 1.2% | 25 out of 6473 background genes, 0.4%  | 0.07173 | 0.06% | RPO41:MSS116:PET127:C1_14330W_A:C2_00820W_A:C2_02120W_A:SUV3:MSU1:C4_00810C_A:C4_03730C_A:C4_05360C_A:MSW1:C6_03440W_A                                                                                                                                                                                                                                                                                                                                         |
| 9070 | serine family amino acid biosynthetic process | 11 out of 1061 genes, 1.0% | 19 out of 6473 background genes, 0.3%  | 0.07683 | 0.06% | CYS4:SNZ1:HOM6:C1_11610C_A:SER33:SER2:SER1:MET15:HOM3:MET16:CYS3                                                                                                                                                                                                                                                                                                                                                                                               |

|       |                            |                           |                                       |         |       |                                                                                   |
|-------|----------------------------|---------------------------|---------------------------------------|---------|-------|-----------------------------------------------------------------------------------|
| 34475 | U4 snRNA 3'-end processing | 8 out of 1061 genes, 0.8% | 11 out of 6473 background genes, 0.2% | 0.08803 | 0.06% | RRP6:C1_05360C_A:C1_07960W_A:REX2:C2_09160W_A:C4_03740W_A:C7_03400C_A:CR_02550C_A |
| 6534  | cysteine metabolic process | 8 out of 1061 genes, 0.8% | 11 out of 6473 background genes, 0.2% | 0.08803 | 0.06% | CYS4:SNZ1:C1_11610C_A:C2_00390C_A:MET15:MET16:CYS3:CR_09010C_A                    |

| 2E+06                               | organonitrogen compound biosynthetic process | 253 out of 1061 genes, 23.8% | 1258 out of 6473 background genes, 19.4% | 0.09736           | 0.06%                | <p>RIM8:LEU4:C1_00510W_A:SPE1:NRM1:HMT1:C1_01150C_A:C1_01530C_A:CYS4:CWH8:SNZ1:SNO1:HOM6:LYS2:MIA40:C1_02970W_A:C1_03540C_A:KTR4:MRPL37:RHD1:ARG2:ARO4:C1_05220C_A:C1_05270C_A:RSM22:RPS27A:C1_05630C_A:C1_05990C_A:BUD16:YMC1:C1_07340W_A:C1_07470C_A:ADE4:GCS1:ADE5,7:MRPL3:ERD1:FUN12:DRG1:SAM4:C1_08520C_A:GCD6:C1_08630W_A:C1_08890C_A:GUA1:C1_09910C_A:MNN23:C1_10080W_A:C1_10200C_A:C1_10340W_A:C1_10690W_A:FGR39:SAM2:C1_11610C_A:C1_11790W_A:MUP1:C1_11880W_A:C1_11910W_A:SER33:TRP3:MRPS9:WRS1:FEN1:RPL14:C1_13060C_A:C1_13330C_A:C1_14330W_A:C2_00390C_A:MXR1:APT1:C2_01740C_A:C2_01860C_A:ARO3:C2_02270C_A:PRS1:SER2:C2_02930C_A:MET1:BNA31:SMP3:C2_03560C_A:GPI13:C2_03950W_A:BAT21:RIM2:C2_04700C_A:C2_04820W_A:C2_05050C_A:CDC21:C2_05270W_A:IDP1:ECM17:ILV1:SER1:VAS1:RPL11:C2_06950C_A:SPE3:AAH1:C2_07680W_A:C2_08530C_A:ASN1:TAZ1:LEU42:HEM3:RPS24:URA3:RKI1:RPS7A:C3_01520C_A:ILV2:PHA2:MET13:YAH1:C3_04380C_A:ADE2:RPS15:RPP2B:ARV1:C3_05280C_A:C3_05380W_A:GPI1:C3_05440C_A:TRM12:C3_06240C_A:OPI3:C3_06830C_A:RPS12:C3_07400W_A:HIS4:MET15:HIS5:C4_00810C_A:C4_00880W_A:ARO1:PTC8:PGA53:ILV6:NIP1:HSX11:TIM10:ZUO1:C4_03410W_A:C4_04130W_A:DUO1:C4_04390W_A:SSZ1:BAS1:RPL30:C4_05360C_A:OFD1:HOM3:TRP5:MET16:TRP4:C4_07140W_A:C5_00030W_A:C5_00280C_A:C5_00320W_A:MRP17:MET14:SPE2:C5_00820W_A:C5_01140C_A:CCN1:C5_01700W_A:C5_02010C_A:THR4:TIF5:C5_02590C_A:MSW1:C5_02780W_A:C5_02820C_A:CAM1-1:C5_03290C_A:PCL1:FUR1:C5_03460C_A:C5_03530C_A:C5_03840W_A:C5_03970W_A:SAH1:C5_04290C_A:URA7:CSU57:MSM1:C5_04720C_A:GRF10:C5_05250C_A:SDH4:HIS1:ILV3:C6_00530C_A:C6_00560W_A:C6_01120C_A:CIC1:PMP1:TIF3:C6_01980C_A:RPL10A:ALG11:C6_02280W_A:C6_02290C_A:C6_02370C_A:NAM2:ILS1:YML6:C7_01020C_A:ASC1:GIR2:PRT1:C7_01570C_A:C7_01600W_A:C7_01950W_A:IFM1:ARG4:HIS7:MRP7:MIS12:CR_00430C_A:MRPL6:ADE1:CR_01260W_A:CR_01320C_A:PRS:TRP2:MET6:CDC60:MCM6:MET2:ERG25:CR_02430C_A:CHO2:PAN6:ARC1:CR_03110W_A:MTG1:CR_03400W_A:CR_04160C_A:ADE6:CR_04920W_A:MTG2:MIS11:URA2:CR_07310W_A:ARO2:CDC45:NOP10:SSB1:CYS3:RPP2A:GSH2:PRO1</p> |
|-------------------------------------|----------------------------------------------|------------------------------|------------------------------------------|-------------------|----------------------|--------------------------------------------------------------------------------------------------------------------------------------------------------------------------------------------------------------------------------------------------------------------------------------------------------------------------------------------------------------------------------------------------------------------------------------------------------------------------------------------------------------------------------------------------------------------------------------------------------------------------------------------------------------------------------------------------------------------------------------------------------------------------------------------------------------------------------------------------------------------------------------------------------------------------------------------------------------------------------------------------------------------------------------------------------------------------------------------------------------------------------------------------------------------------------------------------------------------------------------------------------------------------------------------------------------------------------------------------------------------------------------------------------------------------------------------------------------------------------------------------------------------------------------------------------------------------------------------------------------------------------------------------------------------------------------------------------------------------------------------------------------------------------------------------------------------------------------------------------------------------------------------------------------------------------------------------------------------------------------------------------------------------------------------------------|
| <b>S45 vs B45 Upregulated genes</b> |                                              |                              |                                          |                   |                      |                                                                                                                                                                                                                                                                                                                                                                                                                                                                                                                                                                                                                                                                                                                                                                                                                                                                                                                                                                                                                                                                                                                                                                                                                                                                                                                                                                                                                                                                                                                                                                                                                                                                                                                                                                                                                                                                                                                                                                                                                                                        |
| GOID                                | GO_term                                      | Cluster frequency            | Background frequency                     | Corrected P-value | False discovery rate | Gene(s) annotated to the term                                                                                                                                                                                                                                                                                                                                                                                                                                                                                                                                                                                                                                                                                                                                                                                                                                                                                                                                                                                                                                                                                                                                                                                                                                                                                                                                                                                                                                                                                                                                                                                                                                                                                                                                                                                                                                                                                                                                                                                                                          |

|       |                  |                             |                                         |          |       |                                                                                                                                                                                                                                                                                                                                                                                                                                                                                                                                                                                                                                                                                                                                                                                                                                                                                                                                                                                                                                                                                                                                                                                                                                                                                                                                                                                                                                                                                                                                                                                                                                                                                                                                                                                                                                                                                                                                                                                                                                                                                                                                                                                                                                                                                                                                                                                                                                                                                                                                                                                                                                                               |
|-------|------------------|-----------------------------|-----------------------------------------|----------|-------|---------------------------------------------------------------------------------------------------------------------------------------------------------------------------------------------------------------------------------------------------------------------------------------------------------------------------------------------------------------------------------------------------------------------------------------------------------------------------------------------------------------------------------------------------------------------------------------------------------------------------------------------------------------------------------------------------------------------------------------------------------------------------------------------------------------------------------------------------------------------------------------------------------------------------------------------------------------------------------------------------------------------------------------------------------------------------------------------------------------------------------------------------------------------------------------------------------------------------------------------------------------------------------------------------------------------------------------------------------------------------------------------------------------------------------------------------------------------------------------------------------------------------------------------------------------------------------------------------------------------------------------------------------------------------------------------------------------------------------------------------------------------------------------------------------------------------------------------------------------------------------------------------------------------------------------------------------------------------------------------------------------------------------------------------------------------------------------------------------------------------------------------------------------------------------------------------------------------------------------------------------------------------------------------------------------------------------------------------------------------------------------------------------------------------------------------------------------------------------------------------------------------------------------------------------------------------------------------------------------------------------------------------------------|
| 34470 | ncRNA processing | 306 out of 804 genes, 38.1% | 860 out of 6473 background genes, 13.3% | 2.18E-80 | 0.00% | HBR1:CNS1:RRS1:C1_01150C_A:C1_01160C_A:C1_01470W_A:C1_01900C_A:C1_02090C_A:ABP140:C1_02450C_A:PDE2:TSR2:ARO80:C1_03830C_A:C1_04040C_A:C1_04120C_A:ERB1:NOP4:RRP6:C1_05220C_A:C1_05230W_A:C1_05360C_A:RPS27A:FAL1:C1_05650W_A:C1_06540C_A:NOP6:C1_06760C_A:C1_06770W_A:C1_06800W_A:C1_07090C_A:RIA1:YPD1:PEX3:LHP1:C1_07510W_A:C1_07570C_A:C1_07950C_A:FUN12:GCD6:C1_08630W_A:MSS116:C1_09390W_A:C1_09710C_A:DBP3:TPK1:C1_10620W_A:C1_10970W_A:C1_11000C_A:KRR1:C1_11560C_A:C1_11900C_A:C1_11910W_A:CSI2:C1_12350W_A:C1_12440W_A:C1_12570C_A:CHR1:C1_12760W_A:C1_14080W_A:MPP10:FAV3:NDT80:HMA1:C2_00280C_A:C2_00410C_A:C2_01070W_A:C2_01510C_A:C2_02420C_A:PRS1:C2_02540W_A:C2_02710C_A:PRP3:SCH9:C2_04120C_A:C2_04570W_A:SNU114:C2_04820W_A:C2_05080C_A:MAK5:C2_05160C_A:RPF2:C2_05520W_A:KTI11:TES1:LAS1:CNT:ECM17:RTA2:C2_06480W_A:C2_06850W_A:NOC4:C2_07360W_A:RCL1:PRS5:C2_07920W_A:NSA1:RRP8:C2_08840W_A:PES1:RRP15:C2_09500W_A:C2_09660W_A:CWC22:OCA1:PUS7:C2_10740C_A:C2_10810W_A:C3_00100W_A:UTP8:BUD21:SOF1:C3_00950C_A:BMS1:C3_01560W_A:C3_02020W_A:C3_02040C_A:UTP4:C3_02350W_A:C3_03070W_A:C3_03330C_A:HBR3:URK1:C3_04370C_A:C3_04380C_A:MAK21:SFP1:CEM1:C3_05140C_A:C3_05160C_A:C3_05380W_A:QDR2:C3_05800W_A:C3_05860C_A:NOG1:ELP3:DED1:C3_06150W_A:C3_06370C_A:NSA2:PRP5:C3_06760W_A:NOP13:C3_07400W_A:C3_07480W_A:C3_07550C_A:RIT1:UTP9:DUR4:C4_00490W_A:RLP24:NMD5:C4_00690C_A:C4_00810C_A:C4_00940W_A:MDN1:RAT1:C4_01280C_A:PWP1:C4_01670C_A:C4_02850W_A:ZUO1:C4_02880C_A:C4_03040W_A:C4_03150W_A:C4_03720C_A:C4_03730C_A:C4_03740W_A:C4_03830W_A:RRP42:RAM1:ECM1:C4_04510W_A:SSZ1:C4_04810C_A:AGP3:NBP35:C4_05260W_A:C4_05650W_A:C4_06210C_A:C4_06410W_A:NOP1:C4_06790W_A:C4_07060W_A:C4_07100C_A:DUS4:RMT2:C5_00920W_A:C5_00950C_A:BUD23:PUS4:C5_01430C_A:FYV5:SPB4:C5_01610W_A:C5_01930W_A:RIB2:C5_02010C_A:C5_02070C_A:RIX7:UTP13:C5_02730C_A:C5_03010W_A:RMS1:C5_03670C_A:C5_03920C_A:C5_04610W_A:HAS1:C5_04990W_A:C5_05340W_A:NOP5:C6_01040C_A:RCN1:CIC1:C6_01890C_A:C6_02230W_A:C6_02350C_A:NIP7:MR4:POP4:C6_03210C_A:C6_03390W_A:ALS5:SNQ2:SPB1:C6_04530C_A:C7_00160C_A:C7_00330C_A:NOP15:C7_01030C_A:DBP7:C7_01360C_A:FLU1:C7_02100W_A:C7_02340C_A:C7_02460C_A:C7_02930C_A:ISY1:ENP2:C7_03990C_A:C7_04140C_A:UTP18:CR_00460C_A:CR_00670C_A:BUD22:PWP2:TRM1:CR_01410C_A:CR_01700C_A:CR_01780W_A:CR_02030C_A:CR_02420W_A:RPC19:DBP2:CR_02890C_A:SRP40:CR_03230W_A:CR_03360W_A:KTI12:NCS2:YVH1:IFF3:PRP42:CR_03940W_A:CR_04110W_A:CR_04160C_A:CR_04170W_A:CR_04240C_A:CR_04300W_A:NHP2:NOC2:CR_05550C_A:RNR3:MTG2:DBP8:VPS75:SFL1:RPL7:FGR50:CR_06680C_A:NMD3:CR_06840W_A:CR_07030C_A:CR_07080W_A:CR_07640C_A:DBP6:IMP4:CR_08000C_A:N |
|-------|------------------|-----------------------------|-----------------------------------------|----------|-------|---------------------------------------------------------------------------------------------------------------------------------------------------------------------------------------------------------------------------------------------------------------------------------------------------------------------------------------------------------------------------------------------------------------------------------------------------------------------------------------------------------------------------------------------------------------------------------------------------------------------------------------------------------------------------------------------------------------------------------------------------------------------------------------------------------------------------------------------------------------------------------------------------------------------------------------------------------------------------------------------------------------------------------------------------------------------------------------------------------------------------------------------------------------------------------------------------------------------------------------------------------------------------------------------------------------------------------------------------------------------------------------------------------------------------------------------------------------------------------------------------------------------------------------------------------------------------------------------------------------------------------------------------------------------------------------------------------------------------------------------------------------------------------------------------------------------------------------------------------------------------------------------------------------------------------------------------------------------------------------------------------------------------------------------------------------------------------------------------------------------------------------------------------------------------------------------------------------------------------------------------------------------------------------------------------------------------------------------------------------------------------------------------------------------------------------------------------------------------------------------------------------------------------------------------------------------------------------------------------------------------------------------------------------|

|  |  |  |  |  |  |                                                                                                                                     |
|--|--|--|--|--|--|-------------------------------------------------------------------------------------------------------------------------------------|
|  |  |  |  |  |  | OP10:SSB1:RIO2:TRM9:ATS1:CR_08330W_A:TSR1:PRP8:CR_08940W_A:CR_09110C_A:SSF1:CR_09800C_A:SIK1:UTP5:CR_10410C_A:CR_10470C_A:DRS1:POP3 |
|--|--|--|--|--|--|-------------------------------------------------------------------------------------------------------------------------------------|

|       |                         |                             |                                         |          |       |                                                                                                                                                                                                                                                                                                                                                                                                                                                                                                                                                                                                                                                                                                                                                                                                                                                                                                                                                                                                                                                                                                                                                                                                                                                                                                                                                                                                                                                                                                                                                                                                                                                                                                                                                                                                                                                                                                                                                                                                                                                                                                                                                                                                                                                                                                                                                                                                                                                                                                                                                                                                                                                                |
|-------|-------------------------|-----------------------------|-----------------------------------------|----------|-------|----------------------------------------------------------------------------------------------------------------------------------------------------------------------------------------------------------------------------------------------------------------------------------------------------------------------------------------------------------------------------------------------------------------------------------------------------------------------------------------------------------------------------------------------------------------------------------------------------------------------------------------------------------------------------------------------------------------------------------------------------------------------------------------------------------------------------------------------------------------------------------------------------------------------------------------------------------------------------------------------------------------------------------------------------------------------------------------------------------------------------------------------------------------------------------------------------------------------------------------------------------------------------------------------------------------------------------------------------------------------------------------------------------------------------------------------------------------------------------------------------------------------------------------------------------------------------------------------------------------------------------------------------------------------------------------------------------------------------------------------------------------------------------------------------------------------------------------------------------------------------------------------------------------------------------------------------------------------------------------------------------------------------------------------------------------------------------------------------------------------------------------------------------------------------------------------------------------------------------------------------------------------------------------------------------------------------------------------------------------------------------------------------------------------------------------------------------------------------------------------------------------------------------------------------------------------------------------------------------------------------------------------------------------|
| 34660 | ncRNA metabolic process | 319 out of 804 genes, 39.7% | 935 out of 6473 background genes, 14.4% | 4.19E-79 | 0.00% | HBR1:CNS1:RRS1:C1_01150C_A:C1_01160C_A:C1_01470W_A:C1_01530C_A:C1_01900C_A:C1_02090C_A:ABP140:C1_02450C_A:PDE2:TSR2:ARO80:C1_03830C_A:C1_04040C_A:C1_04120C_A:ERB1:NOP4:RRP6:C1_05220C_A:C1_05230W_A:C1_05360C_A:RPS27A:FAL1:C1_05650W_A:NPL4:C1_06540C_A:NOP6:C1_06760C_A:C1_06770W_A:C1_06800W_A:C1_07090C_A:RIA1:YPD1:PEX3:LHP1:C1_07510W_A:C1_07570C_A:C1_07950C_A:FUN12:GCD6:C1_08630W_A:MSS116:C1_09390W_A:C1_09710C_A:DBP3:TPK1:C1_10620W_A:C1_10970W_A:C1_11000C_A:KRR1:GAR1:C1_11560C_A:C1_11900C_A:C1_11910W_A:CSI2:C1_12350W_A:C1_12440W_A:C1_12570C_A:CHR1:C1_12760W_A:C1_14080W_A:MPP10:FAV3:NDT80:HMA1:C2_00280C_A:C2_00410C_A:C2_01070W_A:C2_01510C_A:C2_02420C_A:PRS1:C2_02540W_A:C2_02710C_A:PRP3:SCH9:C2_04120C_A:C2_04570W_A:SNU114:C2_04820W_A:C2_05080C_A:MAK5:C2_05160C_A:RPF2:RPC40:C2_05520W_A:KTI11:TES1:LAS1:CNT:ECM17:RTA2:C2_06480W_A:C2_06850W_A:RPA12:NOC4:C2_07360W_A:RCL1:PRS5:C2_07920W_A:NSA1:RRP8:RPT6:C2_08840W_A:PES1:RRP15:C2_09500W_A:C2_09660W_A:CWC22:OCA1:PUS7:C2_10740C_A:RPC11:C2_10810W_A:C3_00100W_A:UTP8:BUD21:SOF1:C3_00950C_A:BMS1:C3_01560W_A:C3_02020W_A:C3_02040C_A:UTP4:C3_02350W_A:C3_03070W_A:C3_03330C_A:HBR3:URK1:C3_04370C_A:C3_04380C_A:MAK21:SFP1:CEM1:C3_05140C_A:C3_05160C_A:C3_05380W_A:QDR2:C3_05800W_A:C3_05860C_A:NOG1:ELP3:DED1:C3_06150W_A:C3_06370C_A:NSA2:PRP5:C3_06760W_A:NOP13:C3_07400W_A:C3_07480W_A:C3_07550C_A:RIT1:UTP9:DUR4:C4_00490W_A:RLP24:NMD5:C4_00690C_A:C4_00810C_A:C4_00940W_A:MDN1:RAT1:C4_01280C_A:PWP1:C4_01670C_A:C4_02850W_A:ZUO1:C4_02880C_A:C4_03040W_A:C4_03150W_A:C4_03720C_A:C4_03730C_A:C4_03740W_A:C4_03830W_A:RRP42:RAM1:ECM1:C4_04510W_A:SSZ1:C4_04810C_A:AGP3:NBP35:C4_05260W_A:C4_05650W_A:C4_06210C_A:C4_06410W_A:NOP1:C4_06790W_A:C4_07060W_A:C4_07100C_A:DUS4:RMT2:C5_00920W_A:C5_00950C_A:BUD23:PUS4:C5_01430C_A:FYV5:SPB4:C5_01610W_A:C5_01930W_A:RIB2:C5_02010C_A:C5_02070C_A:RIX7:UTP13:C5_02730C_A:C5_03010W_A:RMS1:RPO26:C5_03670C_A:C5_03920C_A:C5_04610W_A:HAS1:C5_04990W_A:C5_05340W_A:NOP5:C6_01040C_A:RCN1:CIC1:C6_01890C_A:C6_02230W_A:C6_02350C_A:NIP7:MRT4:POP4:C6_03210C_A:C6_03390W_A:ALS5:SNQ2:SPB1:C6_04530C_A:C7_00160C_A:C7_00330C_A:RPA135:NOP15:C7_01030C_A:DBP7:C7_01360C_A:FLU1:C7_02100W_A:C7_02340C_A:C7_02460C_A:C7_02930C_A:ISY1:ENP2:C7_03990C_A:C7_04140C_A:UTP18:CR_00460C_A:CR_00670C_A:BUD22:PWP2:TRM1:CR_01410C_A:CR_01700C_A:CR_01780W_A:CR_01950W_A:CR_02030C_A:CR_02420W_A:RPC19:DBP2:RPC31:CR_02890C_A:SRP40:CR_03110W_A:CR_03230W_A:CR_03360W_A:KTI12:NCS2:YVH1:IFF3:PRP42:CR_03940W_A:CR_04110W_A:CR_04160C_A:CR_04170W_A:CR_04240C_A:CR_04300W_A:NHP2:RPB8:NOC2:CR_05550C_A:RNR3:MTG2:DBP8:VPS75:SFL1:RPL7:F |
|-------|-------------------------|-----------------------------|-----------------------------------------|----------|-------|----------------------------------------------------------------------------------------------------------------------------------------------------------------------------------------------------------------------------------------------------------------------------------------------------------------------------------------------------------------------------------------------------------------------------------------------------------------------------------------------------------------------------------------------------------------------------------------------------------------------------------------------------------------------------------------------------------------------------------------------------------------------------------------------------------------------------------------------------------------------------------------------------------------------------------------------------------------------------------------------------------------------------------------------------------------------------------------------------------------------------------------------------------------------------------------------------------------------------------------------------------------------------------------------------------------------------------------------------------------------------------------------------------------------------------------------------------------------------------------------------------------------------------------------------------------------------------------------------------------------------------------------------------------------------------------------------------------------------------------------------------------------------------------------------------------------------------------------------------------------------------------------------------------------------------------------------------------------------------------------------------------------------------------------------------------------------------------------------------------------------------------------------------------------------------------------------------------------------------------------------------------------------------------------------------------------------------------------------------------------------------------------------------------------------------------------------------------------------------------------------------------------------------------------------------------------------------------------------------------------------------------------------------------|

|  |  |  |  |  |  |                                                                                                                                                                                                                                  |
|--|--|--|--|--|--|----------------------------------------------------------------------------------------------------------------------------------------------------------------------------------------------------------------------------------|
|  |  |  |  |  |  | GR50:CR_06680C_A:NMD3:CR_06840W_A:CR_07030C_A:CR_07080W_A:CR_07640C_A:DBP6:IMP4:CR_08000C_A:NOP10:SSB1:RIO2:TRM9:ATS1:CR_08330W_A:TSR1:PRP8:CR_08940W_A:CR_09110C_A:SSF1:CR_09800C_A:SIK1:UTP5:CR_10410C_A:CR_10470C_A:DRS1:POP3 |
|--|--|--|--|--|--|----------------------------------------------------------------------------------------------------------------------------------------------------------------------------------------------------------------------------------|

|      |                |                             |                                         |          |       |                                                                                                                                                                                                                                                                                                                                                                                                                                                                                                                                                                                                                                                                                                                                                                                                                                                                                                                                                                                                                                                                                                                                                                                                                                                                                                                                                                                                                                                                                                                                                                                                                                                                                                                                                                                                                                                                                                                                                                                                                                                                                                                                                                                                                                                                                                                                                                                                                                                                                                                                                                                                                                                                  |
|------|----------------|-----------------------------|-----------------------------------------|----------|-------|------------------------------------------------------------------------------------------------------------------------------------------------------------------------------------------------------------------------------------------------------------------------------------------------------------------------------------------------------------------------------------------------------------------------------------------------------------------------------------------------------------------------------------------------------------------------------------------------------------------------------------------------------------------------------------------------------------------------------------------------------------------------------------------------------------------------------------------------------------------------------------------------------------------------------------------------------------------------------------------------------------------------------------------------------------------------------------------------------------------------------------------------------------------------------------------------------------------------------------------------------------------------------------------------------------------------------------------------------------------------------------------------------------------------------------------------------------------------------------------------------------------------------------------------------------------------------------------------------------------------------------------------------------------------------------------------------------------------------------------------------------------------------------------------------------------------------------------------------------------------------------------------------------------------------------------------------------------------------------------------------------------------------------------------------------------------------------------------------------------------------------------------------------------------------------------------------------------------------------------------------------------------------------------------------------------------------------------------------------------------------------------------------------------------------------------------------------------------------------------------------------------------------------------------------------------------------------------------------------------------------------------------------------------|
| 6396 | RNA processing | 311 out of 804 genes, 38.7% | 931 out of 6473 background genes, 14.4% | 6.97E-74 | 0.00% | HBR1:CNS1:RRS1:C1_01150C_A:C1_01160C_A:C1_01470W_A:C1_01900C_A:C1_02090C_A:ABP140:C1_02450C_A:PDE2:TSR2:ARO80:C1_03370W_A:C1_03830C_A:C1_04040C_A:C1_04120C_A:ERB1:NOP4:C1_04990C_A:RRP6:C1_05220C_A:C1_05230W_A:C1_05360C_A:RPS27A:FAL1:C1_05650W_A:C1_06540C_A:NOP6:C1_06760C_A:C1_06770W_A:C1_06800W_A:C1_07090C_A:RIA1:YPD1:PEX3:LHP1:C1_07510W_A:C1_07570C_A:C1_07950C_A:FUN12:GCD6:C1_08630W_A:MSS116:C1_09390W_A:C1_09710C_A:DBP3:TPK1:C1_10620W_A:C1_10970W_A:C1_11000C_A:KRR1:C1_11560C_A:C1_11900C_A:C1_11910W_A:CSI2:C1_12350W_A:C1_12440W_A:C1_12570C_A:CHR1:C1_12670C_A:C1_12760W_A:C1_14080W_A:MPP10:FAV3:NDT80:HMA1:C2_00280C_A:C2_00410C_A:C2_01070W_A:C2_01510C_A:C2_02420C_A:PRS1:C2_02540W_A:C2_02710C_A:PRP3:SCH9:C2_04120C_A:C2_04570W_A:SNU114:C2_04820W_A:C2_05080C_A:MAK5:C2_05160C_A:RPF2:C2_05520W_A:KTI11:TES1:LAS1:CNT:ECM17:RTA2:C2_06480W_A:C2_06850W_A:NOC4:C2_07360W_A:RCL1:PRS5:C2_07920W_A:NSA1:RRP8:C2_08840W_A:PES1:RRP15:C2_09500W_A:C2_09660W_A:CWC22:OCA1:PUS7:C2_10740C_A:C2_10810W_A:C3_00100W_A:UTP8:BUD21:SOF1:C3_00950C_A:BMS1:C3_01560W_A:C3_02020W_A:C3_02040C_A:UTP4:C3_02350W_A:C3_03070W_A:C3_03330C_A:HBR3:URK1:C3_04370C_A:C3_04380C_A:MAK21:SFP1:CEM1:C3_05140C_A:C3_05160C_A:C3_05380W_A:QDR2:C3_05800W_A:C3_05860C_A:NOG1:ELP3:DED1:C3_06150W_A:C3_06370C_A:NSA2:PRP5:C3_06760W_A:NOP13:C3_07400W_A:C3_07480W_A:C3_07550C_A:RIT1:UTP9:DUR4:C4_00490W_A:RLP24:NMD5:C4_00690C_A:C4_00810C_A:C4_00940W_A:MDN1:RAT1:C4_01280C_A:PWP1:C4_01670C_A:C4_02850W_A:ZUO1:C4_02880C_A:C4_03040W_A:C4_03150W_A:C4_03720C_A:C4_03730C_A:C4_03740W_A:C4_03830W_A:RRP42:RAM1:ECM1:C4_04510W_A:SSZ1:C4_04810C_A:AGP3:NBP35:C4_05260W_A:C4_05650W_A:C4_06210C_A:C4_06410W_A:NOP1:C4_06790W_A:C4_07060W_A:C4_07100C_A:DUS4:RMT2:C5_00920W_A:C5_00950C_A:BUD23:PUS4:C5_01430C_A:FYV5:SPB4:C5_01610W_A:C5_01930W_A:RIB2:C5_02010C_A:C5_02070C_A:RIX7:UTP13:C5_02730C_A:C5_03010W_A:RMS1:C5_03670C_A:C5_03920C_A:C5_04610W_A:HAS1:C5_04990W_A:C5_05340W_A:NOP5:C6_00530C_A:C6_01040C_A:RCN1:CI1:C6_01890C_A:C6_02230W_A:C6_02350C_A:NIP7:MRT4:POP4:C6_03210C_A:C6_03390W_A:ALS5:SNQ2:SPB1:C6_04530C_A:C7_00160C_A:C7_00330C_A:NOP15:C7_01030C_A:DBP7:C7_01360C_A:FLU1:C7_02100W_A:C7_02340C_A:C7_02460C_A:C7_02930C_A:ISY1:ENP2:C7_03990C_A:C7_04140C_A:UTP18:CR_00460C_A:CR_00670C_A:BUD22:PWP2:TRM1:CR_01410C_A:CR_01700C_A:CR_01780W_A:CR_02030C_A:CR_02420W_A:RPC19:DBP2:CR_02890C_A:SRP40:CR_03230W_A:CR_03360W_A:KTI12:NCS2:YVH1:IFF3:PRP42:CR_03940W_A:CR_04110W_A:CR_04160C_A:CR_04170W_A:CR_04240C_A:CR_04300W_A:NHP2:NOC2:CR_05550C_A:RNR3:MTG2:DBP8:VPS75:SFL1:RPL7:FGR50:CR_06680C_A:NMD3:CR_06840W_A:CR_07030C_A:CR |
|------|----------------|-----------------------------|-----------------------------------------|----------|-------|------------------------------------------------------------------------------------------------------------------------------------------------------------------------------------------------------------------------------------------------------------------------------------------------------------------------------------------------------------------------------------------------------------------------------------------------------------------------------------------------------------------------------------------------------------------------------------------------------------------------------------------------------------------------------------------------------------------------------------------------------------------------------------------------------------------------------------------------------------------------------------------------------------------------------------------------------------------------------------------------------------------------------------------------------------------------------------------------------------------------------------------------------------------------------------------------------------------------------------------------------------------------------------------------------------------------------------------------------------------------------------------------------------------------------------------------------------------------------------------------------------------------------------------------------------------------------------------------------------------------------------------------------------------------------------------------------------------------------------------------------------------------------------------------------------------------------------------------------------------------------------------------------------------------------------------------------------------------------------------------------------------------------------------------------------------------------------------------------------------------------------------------------------------------------------------------------------------------------------------------------------------------------------------------------------------------------------------------------------------------------------------------------------------------------------------------------------------------------------------------------------------------------------------------------------------------------------------------------------------------------------------------------------------|



|  |  |  |  |  |  |                                                                                                                                                                                                               |
|--|--|--|--|--|--|---------------------------------------------------------------------------------------------------------------------------------------------------------------------------------------------------------------|
|  |  |  |  |  |  | <p>_07080W_A:CR_07640C_A:DBP6:IMP4:CR_08000C_A:NOP10:SSB1:RIO2:TRM9:ATS<br/>1:CR_08330W_A:TSR1:PRP8:CR_08940W_A:CR_09110C_A:SSF1:CR_09800C_A:SIK1:<br/>UTP5:CR_10410C_A:CR_10430C_A:CR_10470C_A:DRS1:POP3</p> |
|--|--|--|--|--|--|---------------------------------------------------------------------------------------------------------------------------------------------------------------------------------------------------------------|

|           |                        |                                   |                                                     |          |       |                                                                                                                                                                                                                                                                                                                                                                                                                                                                                                                                                                                                                                                                                                                                                                                                                                                                                                                                                                                                                                                                                                                                                                                                                                                                                                                                                                                                                                                                                                                                                                                                                                                                                                                                                                                                                                                                                                                                                                                                                                                                                                                                                                                                                                                                                                                                                                                                                                                                                                                                                                                                                                                                                                                                                                                                       |
|-----------|------------------------|-----------------------------------|-----------------------------------------------------|----------|-------|-------------------------------------------------------------------------------------------------------------------------------------------------------------------------------------------------------------------------------------------------------------------------------------------------------------------------------------------------------------------------------------------------------------------------------------------------------------------------------------------------------------------------------------------------------------------------------------------------------------------------------------------------------------------------------------------------------------------------------------------------------------------------------------------------------------------------------------------------------------------------------------------------------------------------------------------------------------------------------------------------------------------------------------------------------------------------------------------------------------------------------------------------------------------------------------------------------------------------------------------------------------------------------------------------------------------------------------------------------------------------------------------------------------------------------------------------------------------------------------------------------------------------------------------------------------------------------------------------------------------------------------------------------------------------------------------------------------------------------------------------------------------------------------------------------------------------------------------------------------------------------------------------------------------------------------------------------------------------------------------------------------------------------------------------------------------------------------------------------------------------------------------------------------------------------------------------------------------------------------------------------------------------------------------------------------------------------------------------------------------------------------------------------------------------------------------------------------------------------------------------------------------------------------------------------------------------------------------------------------------------------------------------------------------------------------------------------------------------------------------------------------------------------------------------------|
| 4225<br>4 | ribosome<br>biogenesis | 297 out of<br>804 genes,<br>36.9% | 886 out of<br>6473<br>background<br>genes,<br>13.7% | 4.23E-70 | 0.00% | HBR1:CNS1:RRS1:C1_01160C_A:C1_01470W_A:C1_01900C_A:C1_02090C_A:ABP14<br>0:C1_02450C_A:PDE2:TSR2:RPL6:ARO80:ARX1:C1_03830C_A:C1_04040C_A:C1_041<br>20C_A:ERB1:NOP4:RRP6:C1_05220C_A:C1_05230W_A:C1_05360C_A:RPS27A:FAL1:<br>C1_05650W_A:C1_06540C_A:NOP6:C1_06760C_A:C1_06770W_A:C1_06800W_A:C<br>1_07090C_A:RIA1:YPD1:PEX3:C1_07510W_A:C1_07570C_A:C1_07950C_A:FUN12:G<br>CD6:C1_08630W_A:MSS116:JIP5:C1_09390W_A:YTM1:C1_09710C_A:DBP3:TPK1:C<br>1_10620W_A:C1_10970W_A:C1_11000C_A:KRR1:GAR1:C1_11560C_A:C1_11900C_<br>A:C1_11910W_A:CSI2:C1_12350W_A:C1_12440W_A:C1_12570C_A:CHR1:C1_1268<br>0W_A:C1_12760W_A:C1_13370W_A:C1_14080W_A:MPP10:FAV3:NDT80:C2_0028<br>0C_A:C2_00410C_A:C2_01070W_A:C2_01510C_A:C2_02420C_A:PRS1:C2_02540W<br>_A:C2_02710C_A:PRP3:SCH9:C2_04120C_A:C2_04570W_A:SNU114:C2_04820W_A:<br>C2_05080C_A:MAK5:C2_05160C_A:RPF2:C2_05520W_A:TES1:LAS1:CNT:ECM17:RT<br>A2:RPL11:C2_06850W_A:NOC4:C2_07360W_A:RCL1:PRS5:C2_07920W_A:NSA1:KRE<br>30:RRP8:TIF4631:C2_08840W_A:PES1:RRP15:C2_09660W_A:CWC22:OCA1:PUS7:M<br>TR2:C2_10740C_A:C2_10810W_A:C3_00100W_A:UTP8:BUD21:SOF1:C3_00950C_A:<br>BMS1:C3_01560W_A:C3_02020W_A:C3_02040C_A:UTP4:C3_02350W_A:C3_03070<br>W_A:C3_03330C_A:HBR3:URK1:C3_04370C_A:C3_04380C_A:MAK21:SFP1:CEM1:C3<br>_05160C_A:C3_05380W_A:QDR2:C3_05800W_A:C3_05860C_A:NOG1:DED1:C3_06<br>150W_A:C3_06370C_A:NSA2:PRP5:C3_06760W_A:NOP13:C3_07480W_A:C3_0755<br>0C_A:UTP9:DUR4:C4_00490W_A:RLP24:NMD5:C4_00690C_A:C4_00810C_A:MDN1:<br>RAT1:C4_01280C_A:PWP1:C4_01670C_A:ZUO1:C4_02880C_A:C4_03040W_A:C4_0<br>3150W_A:C4_03720C_A:C4_03740W_A:C4_03830W_A:RRP42:RAM1:ECM1:C4_045<br>10W_A:SSZ1:AGP3:C4_05010W_A:C4_05260W_A:C4_05650W_A:C4_06210C_A:C4<br>_06410W_A:NOP1:C4_06790W_A:C4_07060W_A:C4_07100C_A:RMT2:C5_00920W<br>_A:C5_00950C_A:BUD23:PUS4:C5_01430C_A:FYV5:SPB4:C5_01930W_A:RIB2:C5_0<br>2010C_A:C5_02070C_A:RIX7:TIF5:UTP13:C5_03010W_A:RMS1:C5_03670C_A:C5_0<br>3920C_A:C5_04610W_A:HAS1:C5_04990W_A:C5_05340W_A:NOP5:C6_01040C_A:<br>RCN1:CIC1:C6_01890C_A:C6_02230W_A:NIP7:MRT4:POP4:C6_03210C_A:C6_03390<br>W_A:ALS5:SNQ2:SPB1:C7_00160C_A:C7_00330C_A:RPA135:NOP15:C7_01030C_A:<br>DBP7:C7_01360C_A:FLU1:C7_02100W_A:C7_02460C_A:C7_02930C_A:ISY1:ENP2:C<br>7_04140C_A:UTP18:CR_00460C_A:BUD22:PWP2:CR_01410C_A:CR_01700C_A:CR_0<br>1780W_A:CR_02030C_A:CR_02420W_A:RPC19:DBP2:CR_02890C_A:SRP40:CR_032<br>30W_A:CR_03360W_A:KTI12:NCS2:YVH1:IFF3:SGD1:PRP42:CR_03940W_A:MEX67:<br>CR_04110W_A:CR_04170W_A:CR_04240C_A:NHP2:NOC2:CR_05550C_A:RNR3:MT<br>G2:DBP8:SDA1:VPS75:SFL1:RPL7:FGR50:CR_06680C_A:NMD3:CR_06840W_A:CR_07<br>030C_A:CR_07080W_A:CR_07640C_A:DBP6:IMP4:CR_08000C_A:NOP10:SSB1:RIO2:<br>ATS1:CR_08330W_A:TSR1:CR_08500W_A:PRP8:CR_09110C_A:ELF1:SSF1:CR_09800<br>C_A:SIK1:UTP5:CR_10410C_A:CR_10470C_A:DRS1:POP3 |
|-----------|------------------------|-----------------------------------|-----------------------------------------------------|----------|-------|-------------------------------------------------------------------------------------------------------------------------------------------------------------------------------------------------------------------------------------------------------------------------------------------------------------------------------------------------------------------------------------------------------------------------------------------------------------------------------------------------------------------------------------------------------------------------------------------------------------------------------------------------------------------------------------------------------------------------------------------------------------------------------------------------------------------------------------------------------------------------------------------------------------------------------------------------------------------------------------------------------------------------------------------------------------------------------------------------------------------------------------------------------------------------------------------------------------------------------------------------------------------------------------------------------------------------------------------------------------------------------------------------------------------------------------------------------------------------------------------------------------------------------------------------------------------------------------------------------------------------------------------------------------------------------------------------------------------------------------------------------------------------------------------------------------------------------------------------------------------------------------------------------------------------------------------------------------------------------------------------------------------------------------------------------------------------------------------------------------------------------------------------------------------------------------------------------------------------------------------------------------------------------------------------------------------------------------------------------------------------------------------------------------------------------------------------------------------------------------------------------------------------------------------------------------------------------------------------------------------------------------------------------------------------------------------------------------------------------------------------------------------------------------------------------|

|       |                                      |                             |                                         |          |       |                                                                                                                                                                                                                                                                                                                                                                                                                                                                                                                                                                                                                                                                                                                                                                                                                                                                                                                                                                                                                                                                                                                                                                                                                                                                                                                                                                                                                                                                                                                                                                                                                                                                                                                                                                                                                                                                                                                                                                                                                                                                                                                                                                                                                                                                                                                                                                                                                                                                                                                                                                                                                                                                   |
|-------|--------------------------------------|-----------------------------|-----------------------------------------|----------|-------|-------------------------------------------------------------------------------------------------------------------------------------------------------------------------------------------------------------------------------------------------------------------------------------------------------------------------------------------------------------------------------------------------------------------------------------------------------------------------------------------------------------------------------------------------------------------------------------------------------------------------------------------------------------------------------------------------------------------------------------------------------------------------------------------------------------------------------------------------------------------------------------------------------------------------------------------------------------------------------------------------------------------------------------------------------------------------------------------------------------------------------------------------------------------------------------------------------------------------------------------------------------------------------------------------------------------------------------------------------------------------------------------------------------------------------------------------------------------------------------------------------------------------------------------------------------------------------------------------------------------------------------------------------------------------------------------------------------------------------------------------------------------------------------------------------------------------------------------------------------------------------------------------------------------------------------------------------------------------------------------------------------------------------------------------------------------------------------------------------------------------------------------------------------------------------------------------------------------------------------------------------------------------------------------------------------------------------------------------------------------------------------------------------------------------------------------------------------------------------------------------------------------------------------------------------------------------------------------------------------------------------------------------------------------|
| 22613 | ribonucleoprotein complex biogenesis | 300 out of 804 genes, 37.3% | 915 out of 6473 background genes, 14.1% | 2.58E-68 | 0.00% | HBR1:CNS1:RRS1:C1_01160C_A:C1_01470W_A:C1_01900C_A:C1_02090C_A:ABP140:C1_02450C_A:PDE2:TSR2:RPL6:ARO80:ARX1:C1_03830C_A:C1_04040C_A:C1_04120C_A:ERB1:NOP4:RRP6:C1_05220C_A:C1_05230W_A:C1_05360C_A:RPS27A:FAL1:C1_05650W_A:C1_06540C_A:NOP6:C1_06760C_A:C1_06770W_A:C1_06800W_A:SUI2:C1_07090C_A:RIA1:YPD1:PEX3:C1_07510W_A:C1_07570C_A:C1_07950C_A:FUN12:GCD6:C1_08630W_A:MSS116:JIP5:C1_09390W_A:YTM1:C1_09710C_A:DBP3:TPK1:C1_10620W_A:C1_10970W_A:C1_11000C_A:KRR1:GAR1:C1_11560C_A:C1_11900C_A:C1_11910W_A:CSI2:C1_12350W_A:C1_12440W_A:C1_12570C_A:CHR1:C1_12680W_A:C1_12760W_A:C1_13370W_A:C1_14080W_A:MPP10:FAV3:NDT80:C2_00280C_A:C2_00410C_A:C2_01070W_A:C2_01510C_A:C2_02420C_A:PRS1:C2_02540W_A:C2_02710C_A:PRP3:SCH9:C2_04120C_A:C2_04570W_A:SNU114:C2_04820W_A:C2_05080C_A:MAK5:C2_05160C_A:RPF2:C2_05520W_A:TES1:LAS1:CNT:ECM17:RTA2:RPL11:C2_06850W_A:NOC4:C2_07360W_A:RCL1:PRS5:C2_07920W_A:NSA1:KRE30:RRP8:TIF4631:C2_08840W_A:PES1:RRP15:C2_09660W_A:CWC22:OCA1:PUS7:MTR2:TIF11:C2_10740C_A:C2_10810W_A:C3_00100W_A:UTP8:BUD21:SOF1:C3_00950C_A:BMS1:C3_01560W_A:C3_02020W_A:C3_02040C_A:UTP4:C3_02350W_A:C3_03070W_A:C3_03330C_A:HBR3:URK1:C3_04370C_A:C3_04380C_A:MAK21:SF1:CEM1:C3_05160C_A:C3_05380W_A:QDR2:C3_05800W_A:C3_05860C_A:NOG1:DED1:C3_06150W_A:C3_06370C_A:NSA2:PRP5:C3_06760W_A:NOP13:C3_07480W_A:C3_07550C_A:UTP9:DUR4:C4_00490W_A:RLP24:NMD5:C4_00690C_A:C4_00810C_A:MDN1:RAT1:C4_01280C_A:PWP1:C4_01670C_A:ZUO1:C4_02880C_A:C4_03040W_A:C4_03150W_A:C4_03720C_A:C4_03740W_A:C4_03830W_A:RRP42:RAM1:ECM1:C4_04510W_A:SSZ1:AGP3:C4_05010W_A:C4_05260W_A:C4_05650W_A:C4_06210C_A:C4_06410W_A:NOP1:C4_06790W_A:C4_07060W_A:C4_07100C_A:RMT2:C5_00920W_A:C5_00950C_A:BUD23:PUS4:C5_01430C_A:FYV5:SPB4:C5_01930W_A:RIB2:C5_02010C_A:C5_02070C_A:RIX7:GCD11:TIF5:UTP13:C5_03010W_A:RMS1:C5_03670C_A:C5_03920C_A:C5_04610W_A:HAS1:C5_04990W_A:C5_05340W_A:NOP5:C6_01040C_A:RCN1:CIC1:C6_01890C_A:C6_02230W_A:NIP7:MRT4:POP4:C6_03210C_A:C6_03390W_A:ALS5:SNQ2:SPB1:C7_00160C_A:C7_00330C_A:RPA135:NOP15:C7_01030C_A:DBP7:C7_01360C_A:FLU1:C7_02100W_A:C7_02460C_A:C7_02930C_A:ISY1:ENP2:C7_04140C_A:UTP18:CR_00460C_A:BUD22:PWP2:CR_01410C_A:CR_01700C_A:CR_01780W_A:CR_02030C_A:CR_02420W_A:RPC19:DBP2:CR_02890C_A:SRP40:CR_03230W_A:CR_03360W_A:KTI12:NCS2:YVH1:IFF3:SGD1:PRP42:CR_03940W_A:MEX67:CR_04110W_A:CR_04170W_A:CR_04240C_A:NHP2:NOC2:CR_05550C_A:RNR3:MTG2:DBP8:SDA1:VPS75:SFL1:RPL7:FGR50:CR_06680C_A:NMD3:CR_06840W_A:CR_07030C_A:CR_07080W_A:CR_07640C_A:DBP6:IMP4:CR_08000C_A:NOP10:SSB1:RIO2:ATS1:CR_08330W_A:TSR1:CR_08500W_A:PRP8:CR_09110C_A:ELF1:SSF1:CR_09800C_A:SIK1:UTP5:CR_10410C_A:CR_10470C_A:DRS1:POP3 |
|-------|--------------------------------------|-----------------------------|-----------------------------------------|----------|-------|-------------------------------------------------------------------------------------------------------------------------------------------------------------------------------------------------------------------------------------------------------------------------------------------------------------------------------------------------------------------------------------------------------------------------------------------------------------------------------------------------------------------------------------------------------------------------------------------------------------------------------------------------------------------------------------------------------------------------------------------------------------------------------------------------------------------------------------------------------------------------------------------------------------------------------------------------------------------------------------------------------------------------------------------------------------------------------------------------------------------------------------------------------------------------------------------------------------------------------------------------------------------------------------------------------------------------------------------------------------------------------------------------------------------------------------------------------------------------------------------------------------------------------------------------------------------------------------------------------------------------------------------------------------------------------------------------------------------------------------------------------------------------------------------------------------------------------------------------------------------------------------------------------------------------------------------------------------------------------------------------------------------------------------------------------------------------------------------------------------------------------------------------------------------------------------------------------------------------------------------------------------------------------------------------------------------------------------------------------------------------------------------------------------------------------------------------------------------------------------------------------------------------------------------------------------------------------------------------------------------------------------------------------------------|

|      |                 |                             |                                         |          |       |                                                                                                                                                                                                                                                                                                                                                                                                                                                                                                                                                                                                                                                                                                                                                                                                                                                                                                                                                                                                                                                                                                                                                                                                                                                                                                                                                                                                                                                                                                                                                                                                                                                                                                                                                                                                                                                                                                                                                                                                                                                                                                                                                                                                                                                                                                                                                                                                                                                                                                                |
|------|-----------------|-----------------------------|-----------------------------------------|----------|-------|----------------------------------------------------------------------------------------------------------------------------------------------------------------------------------------------------------------------------------------------------------------------------------------------------------------------------------------------------------------------------------------------------------------------------------------------------------------------------------------------------------------------------------------------------------------------------------------------------------------------------------------------------------------------------------------------------------------------------------------------------------------------------------------------------------------------------------------------------------------------------------------------------------------------------------------------------------------------------------------------------------------------------------------------------------------------------------------------------------------------------------------------------------------------------------------------------------------------------------------------------------------------------------------------------------------------------------------------------------------------------------------------------------------------------------------------------------------------------------------------------------------------------------------------------------------------------------------------------------------------------------------------------------------------------------------------------------------------------------------------------------------------------------------------------------------------------------------------------------------------------------------------------------------------------------------------------------------------------------------------------------------------------------------------------------------------------------------------------------------------------------------------------------------------------------------------------------------------------------------------------------------------------------------------------------------------------------------------------------------------------------------------------------------------------------------------------------------------------------------------------------------|
| 6364 | rRNA processing | 278 out of 804 genes, 34.6% | 806 out of 6473 background genes, 12.5% | 9.64E-68 | 0.00% | HBR1:CNS1:RRS1:C1_01160C_A:C1_01470W_A:C1_01900C_A:C1_02090C_A:ABP140:C1_02450C_A:PDE2:TSR2:ARO80:C1_03830C_A:C1_04040C_A:C1_04120C_A:ERB1:NOP4:RRP6:C1_05220C_A:C1_05230W_A:C1_05360C_A:RPS27A:FAL1:C1_05650W_A:C1_06540C_A:NOP6:C1_06760C_A:C1_06770W_A:C1_06800W_A:C1_07090C_A:RIA1:YPD1:PEX3:C1_07510W_A:C1_07570C_A:C1_07950C_A:FUN12:GCD6:C1_08630W_A:MSS116:C1_09390W_A:C1_09710C_A:DBP3:TPK1:C1_10620W_A:C1_10970W_A:C1_11000C_A:KRR1:C1_11560C_A:C1_11900C_A:C1_11910W_A:CSI2:C1_12350W_A:C1_12440W_A:C1_12570C_A:CHR1:C1_12760W_A:C1_14080W_A:MPP10:FAV3:NDT80:C2_00280C_A:C2_00410C_A:C2_01070W_A:C2_01510C_A:C2_02420C_A:PRS1:C2_02540W_A:C2_02710C_A:PRP3:SCH9:C2_04120C_A:C2_04570W_A:SNU114:C2_04820W_A:C2_05080C_A:MAK5:C2_05160C_A:RPF2:C2_05520W_A:TES1:LAS1:CNT:ECM17:RTA2:C2_06850W_A:NOC4:C2_07360W_A:RCL1:PRS5:C2_07920W_A:NSA1:RRP8:C2_08840W_A:PES1:RRP15:C2_09660W_A:CWC22:OCA1:PUS7:C2_10740C_A:C2_10810W_A:C3_00100W_A:UTP8:BUD21:SOF1:C3_00950C_A:BM51:C3_01560W_A:C3_02020W_A:C3_02040C_A:UTP4:C3_02350W_A:C3_03070W_A:C3_03330C_A:HBR3:URK1:C3_04370C_A:C3_04380C_A:MAK21:SFP1:CEM1:C3_05160C_A:C3_05380W_A:QDR2:C3_05800W_A:C3_05860C_A:NOG1:DED1:C3_06150W_A:C3_06370C_A:NSA2:PRP5:C3_06760W_A:NOP13:C3_07480W_A:C3_07550C_A:UTP9:DUR4:C4_00490W_A:RLP24:NMD5:C4_00690C_A:C4_00810C_A:MDN1:RAT1:C4_01280C_A:PWP1:C4_01670C_A:ZUO1:C4_02880C_A:C4_03040W_A:C4_03150W_A:C4_03720C_A:C4_03740W_A:C4_03830W_A:RRP42:RAM1:ECM1:C4_04510W_A:SSZ1:AGP3:C4_05260W_A:C4_05650W_A:C4_06210C_A:C4_06410W_A:NOP1:C4_06790W_A:C4_07060W_A:C4_07100C_A:RMT2:C5_00920W_A:C5_00950C_A:BUD23:PUS4:C5_01430C_A:FYV5:SPB4:C5_01930W_A:RIB2:C5_02010C_A:C5_02070C_A:RIX7:UTP13:C5_03010W_A:RMS1:C5_03670C_A:C5_03920C_A:C5_04610W_A:HAS1:C5_04990W_A:C5_05340W_A:NOP5:C6_01040C_A:RCN1:CIC1:C6_01890C_A:C6_02230W_A:NIP7:MRT4:POP4:C6_03210C_A:C6_03390W_A:ALS5:SNQ2:SPB1:C7_00160C_A:C7_00330C_A:NOP15:C7_01030C_A:DBP7:C7_01360C_A:FLU1:C7_02100W_A:C7_02460C_A:C7_02930C_A:ISY1:ENP2:C7_04140C_A:UTP18:CR_00460C_A:BUD22:PWP2:CR_01410C_A:CR_01700C_A:CR_01780W_A:CR_02030C_A:CR_02420W_A:RPC19:DBP2:CR_02890C_A:SRP40:CR_03230W_A:CR_03360W_A:KTI12:NCS2:YVH1:IFF3:PRP42:CR_03940W_A:CR_04110W_A:CR_04170W_A:CR_04240C_A:NHP2:NOC2:CR_05550C_A:RNR3:MTG2:DBP8:VPS75:SFL1:RPL7:FGR50:CR_06680C_A:NMD3:CR_06840W_A:CR_07030C_A:CR_07080W_A:CR_07640C_A:DBP6:IMP4:CR_08000C_A:NOP10:SSB1:RIO2:ATS1:CR_08330W_A:TSR1:PRP8:CR_09110C_A:SSF1:CR_09800C_A:SIK1:UTP5:CR_10410C_A:CR_10470C_A:DRS1:POP3 |
|------|-----------------|-----------------------------|-----------------------------------------|----------|-------|----------------------------------------------------------------------------------------------------------------------------------------------------------------------------------------------------------------------------------------------------------------------------------------------------------------------------------------------------------------------------------------------------------------------------------------------------------------------------------------------------------------------------------------------------------------------------------------------------------------------------------------------------------------------------------------------------------------------------------------------------------------------------------------------------------------------------------------------------------------------------------------------------------------------------------------------------------------------------------------------------------------------------------------------------------------------------------------------------------------------------------------------------------------------------------------------------------------------------------------------------------------------------------------------------------------------------------------------------------------------------------------------------------------------------------------------------------------------------------------------------------------------------------------------------------------------------------------------------------------------------------------------------------------------------------------------------------------------------------------------------------------------------------------------------------------------------------------------------------------------------------------------------------------------------------------------------------------------------------------------------------------------------------------------------------------------------------------------------------------------------------------------------------------------------------------------------------------------------------------------------------------------------------------------------------------------------------------------------------------------------------------------------------------------------------------------------------------------------------------------------------------|

|           |                           |                                   |                                                  |          |       |                                                                                                                                                                                                                                                                                                                                                                                                                                                                                                                                                                                                                                                                                                                                                                                                                                                                                                                                                                                                                                                                                                                                                                                                                                                                                                                                                                                                                                                                                                                                                                                                                                                                                                                                                                                                                                                                                                                                                                                                                                                                                                                                                                                                                                                                                                                                                                                                                                                                                                                                                                                                                                                                                                   |
|-----------|---------------------------|-----------------------------------|--------------------------------------------------|----------|-------|---------------------------------------------------------------------------------------------------------------------------------------------------------------------------------------------------------------------------------------------------------------------------------------------------------------------------------------------------------------------------------------------------------------------------------------------------------------------------------------------------------------------------------------------------------------------------------------------------------------------------------------------------------------------------------------------------------------------------------------------------------------------------------------------------------------------------------------------------------------------------------------------------------------------------------------------------------------------------------------------------------------------------------------------------------------------------------------------------------------------------------------------------------------------------------------------------------------------------------------------------------------------------------------------------------------------------------------------------------------------------------------------------------------------------------------------------------------------------------------------------------------------------------------------------------------------------------------------------------------------------------------------------------------------------------------------------------------------------------------------------------------------------------------------------------------------------------------------------------------------------------------------------------------------------------------------------------------------------------------------------------------------------------------------------------------------------------------------------------------------------------------------------------------------------------------------------------------------------------------------------------------------------------------------------------------------------------------------------------------------------------------------------------------------------------------------------------------------------------------------------------------------------------------------------------------------------------------------------------------------------------------------------------------------------------------------------|
| 1607<br>2 | rRNA<br>metabolic process | 283 out of<br>804 genes,<br>35.2% | 835 out of<br>6473<br>background genes,<br>12.9% | 3.12E-67 | 0.00% | HBR1:CNS1:RRS1:C1_01160C_A:C1_01470W_A:C1_01900C_A:C1_02090C_A:ABP14<br>0:C1_02450C_A:PDE2:TSR2:ARO80:C1_03830C_A:C1_04040C_A:C1_04120C_A:ERB<br>1:NOP4:RRP6:C1_05220C_A:C1_05230W_A:C1_05360C_A:RPS27A:FAL1:C1_05650<br>W_A:NPL4:C1_06540C_A:NOP6:C1_06760C_A:C1_06770W_A:C1_06800W_A:C1_0<br>7090C_A:RIA1:YPD1:PEX3:C1_07510W_A:C1_07570C_A:C1_07950C_A:FUN12:GCD<br>6:C1_08630W_A:MSS116:C1_09390W_A:C1_09710C_A:DBP3:TPK1:C1_10620W_A:<br>C1_10970W_A:C1_11000C_A:KRR1:C1_11560C_A:C1_11900C_A:C1_11910W_A:CSI<br>2:C1_12350W_A:C1_12440W_A:C1_12570C_A:CHR1:C1_12760W_A:C1_14080W_A<br>:MPP10:FAV3:NDT80:C2_00280C_A:C2_00410C_A:C2_01070W_A:C2_01510C_A:C2<br>_02420C_A:PRS1:C2_02540W_A:C2_02710C_A:PRP3:SCH9:C2_04120C_A:C2_04570<br>W_A:SNU114:C2_04820W_A:C2_05080C_A:MAK5:C2_05160C_A:RPF2:C2_05520W<br>_A:TES1:LAS1:CNT:ECM17:RTA2:C2_06850W_A:RPA12:NOC4:C2_07360W_A:RCL1:P<br>RS5:C2_07920W_A:NSA1:RRP8:RPT6:C2_08840W_A:PES1:RRP15:C2_09660W_A:C<br>WC22:OCA1:PUS7:C2_10740C_A:C2_10810W_A:C3_00100W_A:UTP8:BUD21:SOF1:<br>C3_00950C_A:BMS1:C3_01560W_A:C3_02020W_A:C3_02040C_A:UTP4:C3_02350<br>W_A:C3_03070W_A:C3_03330C_A:HBR3:URK1:C3_04370C_A:C3_04380C_A:MAK2<br>1:SFP1:CEM1:C3_05160C_A:C3_05380W_A:QDR2:C3_05800W_A:C3_05860C_A:NO<br>G1:DED1:C3_06150W_A:C3_06370C_A:NSA2:PRP5:C3_06760W_A:NOP13:C3_0748<br>0W_A:C3_07550C_A:UTP9:DUR4:C4_00490W_A:RLP24:NMD5:C4_00690C_A:C4_00<br>810C_A:MDN1:RAT1:C4_01280C_A:PWP1:C4_01670C_A:ZUO1:C4_02880C_A:C4_0<br>3040W_A:C4_03150W_A:C4_03720C_A:C4_03740W_A:C4_03830W_A:RRP42:RAM<br>1:ECM1:C4_04510W_A:SSZ1:AGP3:C4_05260W_A:C4_05650W_A:C4_06210C_A:C4<br>_06410W_A:NOP1:C4_06790W_A:C4_07060W_A:C4_07100C_A:RMT2:C5_00920W<br>_A:C5_00950C_A:BUD23:PUS4:C5_01430C_A:FYV5:SPB4:C5_01930W_A:RIB2:C5_0<br>2010C_A:C5_02070C_A:RIX7:UTP13:C5_03010W_A:RMS1:C5_03670C_A:C5_03920<br>C_A:C5_04610W_A:HAS1:C5_04990W_A:C5_05340W_A:NOP5:C6_01040C_A:RCN1<br>:CIC1:C6_01890C_A:C6_02230W_A:NIP7:MRT4:POP4:C6_03210C_A:C6_03390W_A:<br>ALS5:SNQ2:SPB1:C7_00160C_A:C7_00330C_A:RPA135:NOP15:C7_01030C_A:DBP7:<br>C7_01360C_A:FLU1:C7_02100W_A:C7_02460C_A:C7_02930C_A:ISY1:ENP2:C7_041<br>40C_A:UTP18:CR_00460C_A:BUD22:PWP2:CR_01410C_A:CR_01700C_A:CR_01780<br>W_A:CR_01950W_A:CR_02030C_A:CR_02420W_A:RPC19:DBP2:CR_02890C_A:SRP<br>40:CR_03230W_A:CR_03360W_A:KTI12:NCS2:YVH1:IFF3:PRP42:CR_03940W_A:CR_<br>04110W_A:CR_04170W_A:CR_04240C_A:NHP2:NOC2:CR_05550C_A:RNR3:MTG2:D<br>BP8:VPS75:SFL1:RPL7:FGR50:CR_06680C_A:NMD3:CR_06840W_A:CR_07030C_A:CR<br>_07080W_A:CR_07640C_A:DBP6:IMP4:CR_08000C_A:NOP10:SSB1:RIO2:ATS1:CR_0<br>8330W_A:TSR1:PRP8:CR_09110C_A:SSF1:CR_09800C_A:SIK1:UTP5:CR_10410C_A:C<br>R_10470C_A:DRS1:POP3 |
|-----------|---------------------------|-----------------------------------|--------------------------------------------------|----------|-------|---------------------------------------------------------------------------------------------------------------------------------------------------------------------------------------------------------------------------------------------------------------------------------------------------------------------------------------------------------------------------------------------------------------------------------------------------------------------------------------------------------------------------------------------------------------------------------------------------------------------------------------------------------------------------------------------------------------------------------------------------------------------------------------------------------------------------------------------------------------------------------------------------------------------------------------------------------------------------------------------------------------------------------------------------------------------------------------------------------------------------------------------------------------------------------------------------------------------------------------------------------------------------------------------------------------------------------------------------------------------------------------------------------------------------------------------------------------------------------------------------------------------------------------------------------------------------------------------------------------------------------------------------------------------------------------------------------------------------------------------------------------------------------------------------------------------------------------------------------------------------------------------------------------------------------------------------------------------------------------------------------------------------------------------------------------------------------------------------------------------------------------------------------------------------------------------------------------------------------------------------------------------------------------------------------------------------------------------------------------------------------------------------------------------------------------------------------------------------------------------------------------------------------------------------------------------------------------------------------------------------------------------------------------------------------------------------|

|       |                       |                             |                                          |          |       |                                                                                                                                                                                                                                                                                                                                                                                                                                                                                                                                                                                                                                                                                                                                                                                                                                                                                                                                                                                                                                                                                                                                                                                                                                                                                                                                                                                                                                                                                                                                                                                                                                                                                                                                                                                                                                                                                                                                                                                                                                                                                                                                                                                                                                                                                                                                                                                                                                                                                                                                                                                                                                                                        |
|-------|-----------------------|-----------------------------|------------------------------------------|----------|-------|------------------------------------------------------------------------------------------------------------------------------------------------------------------------------------------------------------------------------------------------------------------------------------------------------------------------------------------------------------------------------------------------------------------------------------------------------------------------------------------------------------------------------------------------------------------------------------------------------------------------------------------------------------------------------------------------------------------------------------------------------------------------------------------------------------------------------------------------------------------------------------------------------------------------------------------------------------------------------------------------------------------------------------------------------------------------------------------------------------------------------------------------------------------------------------------------------------------------------------------------------------------------------------------------------------------------------------------------------------------------------------------------------------------------------------------------------------------------------------------------------------------------------------------------------------------------------------------------------------------------------------------------------------------------------------------------------------------------------------------------------------------------------------------------------------------------------------------------------------------------------------------------------------------------------------------------------------------------------------------------------------------------------------------------------------------------------------------------------------------------------------------------------------------------------------------------------------------------------------------------------------------------------------------------------------------------------------------------------------------------------------------------------------------------------------------------------------------------------------------------------------------------------------------------------------------------------------------------------------------------------------------------------------------------|
| 16070 | RNA metabolic process | 339 out of 804 genes, 42.2% | 1245 out of 6473 background genes, 19.2% | 7.75E-56 | 0.00% | HBR1:CNS1:RRS1:C1_01150C_A:C1_01160C_A:C1_01470W_A:C1_01530C_A:C1_01900C_A:C1_02090C_A:ABP140:C1_02450C_A:PDE2:TSR2:ARO80:C1_03370W_A:C1_03830C_A:C1_04040C_A:C1_04120C_A:ERB1:NOP4:C1_04990C_A:RRP6:C1_05220C_A:C1_05230W_A:C1_05360C_A:RPS27A:FAL1:C1_05650W_A:NPL4:C1_06540C_A:NOP6:C1_06760C_A:C1_06770W_A:C1_06800W_A:C1_07090C_A:RIA1:YPD1:PEX3:LHP1:C1_07510W_A:C1_07570C_A:C1_07950C_A:FUN12:GCD6:C1_08630W_A:MSS116:C1_09390W_A:C1_09710C_A:DBP3:TPK1:C1_10620W_A:C1_10970W_A:C1_11000C_A:KRR1:GAR1:C1_11560C_A:C1_11900C_A:C1_11910W_A:CSI2:C1_12350W_A:C1_12440W_A:C1_12570C_A:CHR1:C1_12670C_A:C1_12760W_A:C1_14080W_A:MPP10:FAV3:NDT80:HMA1:C2_00220C_A:C2_00280C_A:C2_00410C_A:C2_01070W_A:C2_01510C_A:C2_01870C_A:C2_02420C_A:PRS1:C2_02540W_A:C2_02710C_A:PRP3:C2_03550C_A:SCH9:C2_04120C_A:C2_04570W_A:SNU114:C2_04820W_A:CRK1:C2_05080C_A:MAK5:ERF1:C2_05160C_A:RPF2:RPC40:C2_05520W_A:KTI11:TES1:LAS1:CNT:ECM17:RTA2:C2_06480W_A:C2_06850W_A:RPA12:NOC4:C2_07360W_A:RCL1:PRS5:C2_07920W_A:NSA1:RRP8:TIF4631:RPT6:C2_08840W_A:PES1:RRP15:C2_09500W_A:C2_09660W_A:CWC22:OCA1:PUS7:C2_10740C_A:RPC11:C2_10810W_A:C3_00100W_A:UTP8:BUD21:SOF1:C3_00950C_A:BMS1:C3_01560W_A:C3_02020W_A:C3_02040C_A:UTP4:C3_02350W_A:C3_03070W_A:C3_03330C_A:HBR3:URK1:C3_04370C_A:C3_04380C_A:MAK21:SFP1:CEM1:C3_05140C_A:C3_05160C_A:C3_05380W_A:QDR2:C3_05800W_A:C3_05860C_A:CTA4:NOG1:ELP3:DED1:C3_06150W_A:C3_06370C_A:NSA2:PRP5:C3_06760W_A:NOP13:C3_07400W_A:C3_07480W_A:C3_07550C_A:RIT1:UTP9:DUR4:C4_00490W_A:RLP24:NMD5:C4_00690C_A:C4_00810C_A:C4_00940W_A:MDN1:RAT1:C4_01280C_A:PWP1:C4_01670C_A:TOA2:C4_02850W_A:ZUO1:C4_02880C_A:C4_03040W_A:C4_03150W_A:C4_03720C_A:C4_03730C_A:C4_03740W_A:C4_03830W_A:RRP42:RAM1:ECM1:C4_04510W_A:SSZ1:C4_04810C_A:AGP3:NBP35:C4_05260W_A:C4_05650W_A:C4_06210C_A:C4_06410W_A:NOP1:C4_06790W_A:C4_07060W_A:C4_07100C_A:C5_00280C_A:DUS4:RMT2:C5_00920W_A:C5_00950C_A:BUD23:PUS4:C5_01430C_A:FYV5:SPB4:C5_01610W_A:C5_01930W_A:RIB2:C5_02010C_A:C5_02070C_A:RIX7:TIF5:UTP13:C5_02730C_A:C5_03010W_A:RMS1:RPO26:C5_03670C_A:FGR27:C5_03920C_A:C5_04610W_A:HAS1:C5_04990W_A:C5_05340W_A:NOP5:C6_00530C_A:C6_00640C_A:C6_01040C_A:RCN1:CIC1:C6_01890C_A:C6_02230W_A:C6_02350C_A:NIP7:MRT4:POP4:C6_03210C_A:C6_03390W_A:FGR17:ALS5:SNQ2:SPB1:C6_04530C_A:C7_00160C_A:C7_00330C_A:RPA135:NOP15:C7_01030C_A:DBP7:C7_01360C_A:FLU1:C7_02100W_A:C7_02340C_A:C7_02460C_A:C7_02930C_A:ZCF29:ISY1:ENP2:C7_03990C_A:C7_04140C_A:UTP18:CR_00460C_A:CR_00670C_A:BUD22:PWP2:TRM1:CR_01410C_A:CR_01700C_A:CR_01780W_A:CR_01950W_A:CR_02030C_A:CR_02420W_A:RPC19:DBP2:RPC31:CR_02890C_A:SRP40:CR_03110W_A:CR_03230W_A:CR_03360W_A:KTI12:N |
|-------|-----------------------|-----------------------------|------------------------------------------|----------|-------|------------------------------------------------------------------------------------------------------------------------------------------------------------------------------------------------------------------------------------------------------------------------------------------------------------------------------------------------------------------------------------------------------------------------------------------------------------------------------------------------------------------------------------------------------------------------------------------------------------------------------------------------------------------------------------------------------------------------------------------------------------------------------------------------------------------------------------------------------------------------------------------------------------------------------------------------------------------------------------------------------------------------------------------------------------------------------------------------------------------------------------------------------------------------------------------------------------------------------------------------------------------------------------------------------------------------------------------------------------------------------------------------------------------------------------------------------------------------------------------------------------------------------------------------------------------------------------------------------------------------------------------------------------------------------------------------------------------------------------------------------------------------------------------------------------------------------------------------------------------------------------------------------------------------------------------------------------------------------------------------------------------------------------------------------------------------------------------------------------------------------------------------------------------------------------------------------------------------------------------------------------------------------------------------------------------------------------------------------------------------------------------------------------------------------------------------------------------------------------------------------------------------------------------------------------------------------------------------------------------------------------------------------------------------|

|  |  |  |  |  |  |                                                                                                                                                                                                                                                                                                                                                                                                          |
|--|--|--|--|--|--|----------------------------------------------------------------------------------------------------------------------------------------------------------------------------------------------------------------------------------------------------------------------------------------------------------------------------------------------------------------------------------------------------------|
|  |  |  |  |  |  | CS2:YVH1:IFF3:SGD1:PRP42:CR_03940W_A:CR_04110W_A:CR_04160C_A:CR_04170W_A:CR_04240C_A:CR_04300W_A:NHP2:RPB8:NOC2:CR_05550C_A:RNR3:MTG2:DBP8:VPS75:SFL1:RPL7:FGR50:CR_06680C_A:NMD3:CR_06840W_A:CR_07030C_A:CR_07080W_A:CR_07640C_A:DBP6:IMP4:CR_08000C_A:NOP10:SSB1:RIO2:TRM9:ATS1:CR_08330W_A:TSR1:PRP8:CR_08940W_A:CR_09110C_A:SSF1:CR_09800C_A:SIK1:UTP5:CR_10410C_A:CR_10430C_A:CR_10470C_A:DRS1:POP3 |
|--|--|--|--|--|--|----------------------------------------------------------------------------------------------------------------------------------------------------------------------------------------------------------------------------------------------------------------------------------------------------------------------------------------------------------------------------------------------------------|

|       |                                    |                             |                                        |          |       |                                                                                                                                                                                                                                                                                                                                                                                                                                                                                                                                                                                                                                                                                                                                                                                                                                                                                                                                                                                                                                                                                                                                                                                                                                                                                                                                                                                                                                                                                                                                                                                                                                                                                                                                                                                                                                                                                                                                                                                                                                                                                             |
|-------|------------------------------------|-----------------------------|----------------------------------------|----------|-------|---------------------------------------------------------------------------------------------------------------------------------------------------------------------------------------------------------------------------------------------------------------------------------------------------------------------------------------------------------------------------------------------------------------------------------------------------------------------------------------------------------------------------------------------------------------------------------------------------------------------------------------------------------------------------------------------------------------------------------------------------------------------------------------------------------------------------------------------------------------------------------------------------------------------------------------------------------------------------------------------------------------------------------------------------------------------------------------------------------------------------------------------------------------------------------------------------------------------------------------------------------------------------------------------------------------------------------------------------------------------------------------------------------------------------------------------------------------------------------------------------------------------------------------------------------------------------------------------------------------------------------------------------------------------------------------------------------------------------------------------------------------------------------------------------------------------------------------------------------------------------------------------------------------------------------------------------------------------------------------------------------------------------------------------------------------------------------------------|
| 42274 | ribosomal small subunit biogenesis | 225 out of 804 genes, 28.0% | 636 out of 6473 background genes, 9.8% | 1.09E-54 | 0.00% | HBR1:CNS1:RRS1:C1_01160C_A:C1_01470W_A:C1_02090C_A:ABP140:C1_02450C_A:TSR2:ARO80:C1_03830C_A:C1_04040C_A:C1_04120C_A:NOP4:C1_05220C_A:C1_05230W_A:C1_05360C_A:RPS27A:FAL1:C1_05650W_A:C1_06540C_A:NOP6:C1_06770W_A:C1_06800W_A:C1_07090C_A:RIA1:C1_07510W_A:C1_07570C_A:FUN12:GCD6:C1_08630W_A:MSS116:C1_09390W_A:C1_09710C_A:C1_11000C_A:KRR1:C1_11900C_A:C1_12350W_A:C1_12440W_A:C1_12570C_A:CHR1:C1_14080W_A:MPP10:FAV3:NDT80:C2_00280C_A:C2_00410C_A:C2_01070W_A:C2_01510C_A:C2_02420C_A:PRS1:C2_02540W_A:C2_02710C_A:PRP3:SCH9:C2_04120C_A:C2_04570W_A:C2_04820W_A:C2_05080C_A:MAK5:C2_05160C_A:C2_05520W_A:LAS1:RTA2:C2_06850W_A:NOC4:C2_07360W_A:RCL1:PRS5:C2_07920W_A:NSA1:RRP8:C2_08840W_A:PES1:RRP15:C2_09660W_A:CWC22:C2_10740C_A:C2_10810W_A:C3_00100W_A:UTP8:BUD21:SOF1:C3_00950C_A:BMS1:C3_01560W_A:C3_02020W_A:C3_02040C_A:UTP4:C3_02350W_A:C3_03070W_A:C3_03330C_A:HBR3:URK1:C3_04370C_A:C3_04380C_A:MAK21:SFP1:CEM1:C3_05160C_A:QDR2:C3_05800W_A:DED1:C3_06150W_A:C3_06370C_A:NSA2:PRP5:C3_06760W_A:NOP13:C3_07480W_A:C3_07550C_A:UTP9:DUR4:C4_00490W_A:RLP24:NMD5:C4_00690C_A:C4_00810C_A:MDN1:RAT1:C4_01280C_A:C4_02880C_A:C4_03040W_A:C4_03150W_A:C4_03720C_A:C4_03740W_A:C4_03830W_A:ECM1:C4_04510W_A:C4_05260W_A:C4_05650W_A:C4_06790W_A:C4_07060W_A:C4_07100C_A:C5_00920W_A:C5_00950C_A:BUD23:PUS4:C5_01430C_A:FYV5:SPB4:RIB2:C5_02010C_A:C5_02070C_A:RIX7:UTP13:C5_03010W_A:RMS1:C5_03670C_A:C5_03920C_A:HAS1:C5_04990W_A:C5_05340W_A:NOP5:C6_01040C_A:CIC1:C6_01890C_A:C6_02230W_A:NIP7:POP4:C6_03210C_A:ALS5:SNQ2:C7_00160C_A:C7_00330C_A:NOP15:C7_01030C_A:DBP7:C7_01360C_A:C7_02100W_A:C7_02460C_A:C7_02930C_A:ISY1:ENP2:C7_04140C_A:UTP18:CR_00460C_A:BUD22:PWP2:CR_01410C_A:CR_01700C_A:CR_01780W_A:CR_02030C_A:CR_02420W_A:RPC19:CR_02890C_A:SRP40:CR_03230W_A:CR_03360W_A:KTI12:NCS2:YVH1:IFF3:SGD1:CR_03940W_A:CR_04110W_A:CR_04240C_A:NOC2:CR_05550C_A:RNR3:MTG2:DBP8:VPS75:SFL1:FGR50:CR_06680C_A:NMD3:CR_06840W_A:CR_07030C_A:CR_07080W_A:DBP6:IMP4:CR_08000C_A:RIO2:ATS1:CR_08330W_A:TSR1:PRP8:ELF1:CR_09800C_A:UTP5:CR_10410C_A:CR_10470C_A:DRS1:POP3 |
|-------|------------------------------------|-----------------------------|----------------------------------------|----------|-------|---------------------------------------------------------------------------------------------------------------------------------------------------------------------------------------------------------------------------------------------------------------------------------------------------------------------------------------------------------------------------------------------------------------------------------------------------------------------------------------------------------------------------------------------------------------------------------------------------------------------------------------------------------------------------------------------------------------------------------------------------------------------------------------------------------------------------------------------------------------------------------------------------------------------------------------------------------------------------------------------------------------------------------------------------------------------------------------------------------------------------------------------------------------------------------------------------------------------------------------------------------------------------------------------------------------------------------------------------------------------------------------------------------------------------------------------------------------------------------------------------------------------------------------------------------------------------------------------------------------------------------------------------------------------------------------------------------------------------------------------------------------------------------------------------------------------------------------------------------------------------------------------------------------------------------------------------------------------------------------------------------------------------------------------------------------------------------------------|



|       |                                   |                                   |                                                     |          |       |                                                                                                                                                                                                                                                                                                                                                                                                                                                                                                                                                                                                                                                                                                                                                                                                                                                                                                                                                                                                                                                                                                                                                                                                                                                                                                                                                                                                                                                                                                                                                                                                                                                                                                                                                                                                                                                                                                                                                                                                                                                                       |
|-------|-----------------------------------|-----------------------------------|-----------------------------------------------------|----------|-------|-----------------------------------------------------------------------------------------------------------------------------------------------------------------------------------------------------------------------------------------------------------------------------------------------------------------------------------------------------------------------------------------------------------------------------------------------------------------------------------------------------------------------------------------------------------------------------------------------------------------------------------------------------------------------------------------------------------------------------------------------------------------------------------------------------------------------------------------------------------------------------------------------------------------------------------------------------------------------------------------------------------------------------------------------------------------------------------------------------------------------------------------------------------------------------------------------------------------------------------------------------------------------------------------------------------------------------------------------------------------------------------------------------------------------------------------------------------------------------------------------------------------------------------------------------------------------------------------------------------------------------------------------------------------------------------------------------------------------------------------------------------------------------------------------------------------------------------------------------------------------------------------------------------------------------------------------------------------------------------------------------------------------------------------------------------------------|
| 30490 | maturati<br>on of<br>SSU-<br>rRNA | 222 out of<br>804 genes,<br>27.6% | 627 out of<br>6473<br>backgroun<br>d genes,<br>9.7% | 6.79E-54 | 0.00% | HBR1:CNS1:RRS1:C1_01160C_A:C1_01470W_A:C1_02090C_A:ABP140:C1_02450C_A:TSR2:ARO80:C1_03830C_A:C1_04040C_A:C1_04120C_A:NOP4:C1_05220C_A:C1_05230W_A:C1_05360C_A:RPS27A:FAL1:C1_05650W_A:C1_06540C_A:NOP6:C1_06770W_A:C1_06800W_A:C1_07090C_A:RIA1:C1_07510W_A:C1_07570C_A:FUN12:GCD6:C1_08630W_A:MSS116:C1_09390W_A:C1_09710C_A:C1_11000C_A:KRR1:C1_11900C_A:C1_12350W_A:C1_12440W_A:C1_12570C_A:CHR1:C1_14080W_A:MPP10:FAV3:NDT80:C2_00280C_A:C2_00410C_A:C2_01070W_A:C2_01510C_A:C2_02420C_A:PRS1:C2_02540W_A:PRP3:SCH9:C2_04120C_A:C2_04570W_A:C2_04820W_A:C2_05080C_A:MAK5:C2_05160C_A:C2_05520W_A:LAS1:RTA2:C2_06850W_A:NOC4:C2_07360W_A:RCL1:PRS5:C2_07920W_A:NSA1:RRP8:C2_08840W_A:PES1:RRP15:C2_09660W_A:CWC22:C2_10740C_A:C2_10810W_A:C3_00100W_A:UTP8:BUD21:SOF1:C3_00950C_A:BMS1:C3_01560W_A:C3_02020W_A:C3_02040C_A:UTP4:C3_02350W_A:C3_03070W_A:C3_03330C_A:HBR3:URK1:C3_04370C_A:C3_04380C_A:MAK21:SFP1:CEM1:C3_05160C_A:QDR2:C3_05800W_A:DED1:C3_06150W_A:C3_06370C_A:NSA2:PRP5:C3_06760W_A:NOP13:C3_07480W_A:C3_07550C_A:UTP9:DUR4:C4_00490W_A:RLP24:NMD5:C4_00690C_A:C4_00810C_A:MDN1:RAT1:C4_01280C_A:C4_02880C_A:C4_03040W_A:C4_03150W_A:C4_03720C_A:C4_03740W_A:C4_03830W_A:ECM1:C4_04510W_A:C4_05260W_A:C4_05650W_A:C4_06790W_A:C4_07060W_A:C4_07100C_A:C5_00920W_A:C5_00950C_A:BUD23:PUS4:C5_01430C_A:FYV5:SPB4:RIB2:C5_02010C_A:C5_02070C_A:RIX7:UTP13:C5_03010W_A:RMS1:C5_03670C_A:C5_03920C_A:HAS1:C5_04990W_A:C5_05340W_A:NOP5:C6_01040C_A:CIC1:C6_01890C_A:C6_02230W_A:NIP7:POP4:C6_03210C_A:ALS5:SNQ2:C7_00160C_A:C7_00330C_A:NOP15:C7_01030C_A:DBP7:C7_01360C_A:C7_02100W_A:C7_02460C_A:C7_02930C_A:ISY1:ENP2:C7_04140C_A:UTP18:CR_00460C_A:BUD22:PWP2:CR_01410C_A:CR_01700C_A:CR_01780W_A:CR_02030C_A:CR_02420W_A:RPC19:CR_02890C_A:SRP40:CR_03230W_A:CR_03360W_A:KTI12:NCS2:YVH1:IFF3:CR_03940W_A:CR_04110W_A:CR_04240C_A:NOC2:CR_05550C_A:RNR3:MTG2:DBP8:VPS75:SFL1:FGR50:CR_06680C_A:NMD3:CR_06840W_A:CR_07030C_A:CR_07080W_A:DBP6:IMP4:CR_08000C_A:RIO2:ATS1:CR_08330W_A:TSR1:PRP8:CR_09800C_A:UTP5:CR_10410C_A:CR_10470C_A:DRS1:POP3 |
|-------|-----------------------------------|-----------------------------------|-----------------------------------------------------|----------|-------|-----------------------------------------------------------------------------------------------------------------------------------------------------------------------------------------------------------------------------------------------------------------------------------------------------------------------------------------------------------------------------------------------------------------------------------------------------------------------------------------------------------------------------------------------------------------------------------------------------------------------------------------------------------------------------------------------------------------------------------------------------------------------------------------------------------------------------------------------------------------------------------------------------------------------------------------------------------------------------------------------------------------------------------------------------------------------------------------------------------------------------------------------------------------------------------------------------------------------------------------------------------------------------------------------------------------------------------------------------------------------------------------------------------------------------------------------------------------------------------------------------------------------------------------------------------------------------------------------------------------------------------------------------------------------------------------------------------------------------------------------------------------------------------------------------------------------------------------------------------------------------------------------------------------------------------------------------------------------------------------------------------------------------------------------------------------------|

|     |                                                                                                                                       |                                   |                                                     |          |       |                                                                                                                                                                                                                                                                                                                                                                                                                                                                                                                                                                                                                                                                                                                                                                                                                                                                                                                                                                                                                                                                                                                                                                                                                                                                                                                                                                                                                                                                                                                                                                                                                                                                                                                                                                                                                                                                                                                                                                                                                                   |
|-----|---------------------------------------------------------------------------------------------------------------------------------------|-----------------------------------|-----------------------------------------------------|----------|-------|-----------------------------------------------------------------------------------------------------------------------------------------------------------------------------------------------------------------------------------------------------------------------------------------------------------------------------------------------------------------------------------------------------------------------------------------------------------------------------------------------------------------------------------------------------------------------------------------------------------------------------------------------------------------------------------------------------------------------------------------------------------------------------------------------------------------------------------------------------------------------------------------------------------------------------------------------------------------------------------------------------------------------------------------------------------------------------------------------------------------------------------------------------------------------------------------------------------------------------------------------------------------------------------------------------------------------------------------------------------------------------------------------------------------------------------------------------------------------------------------------------------------------------------------------------------------------------------------------------------------------------------------------------------------------------------------------------------------------------------------------------------------------------------------------------------------------------------------------------------------------------------------------------------------------------------------------------------------------------------------------------------------------------------|
| 462 | maturati<br>on of<br>SSU-<br>rRNA<br>from<br>tricistroni<br>c rRNA<br>transcrip<br>t (SSU-<br>rRNA,<br>5.8S<br>rRNA,<br>LSU-<br>rRNA) | 219 out of<br>804 genes,<br>27.2% | 620 out of<br>6473<br>backgroun<br>d genes,<br>9.6% | 8.08E-53 | 0.00% | HBR1:CNS1:RRS1:C1_01160C_A:C1_01470W_A:C1_02090C_A:ABP140:C1_02450C_A:TSR2:ARO80:C1_03830C_A:C1_04040C_A:C1_04120C_A:NOP4:C1_05220C_A:C1_05230W_A:C1_05360C_A:RPS27A:FAL1:C1_05650W_A:C1_06540C_A:NOP6:C1_06770W_A:C1_06800W_A:C1_07090C_A:RIA1:C1_07510W_A:C1_07570C_A:FUN12:GCD6:C1_08630W_A:MSS116:C1_09390W_A:C1_09710C_A:C1_11000C_A:KRR1:C1_11900C_A:C1_12350W_A:C1_12440W_A:C1_12570C_A:CHR1:C1_14080W_A:MPP10:FAV3:NDT80:C2_00280C_A:C2_00410C_A:C2_01070W_A:C2_01510C_A:C2_02420C_A:PRS1:C2_02540W_A:PRP3:SCH9:C2_04120C_A:C2_04570W_A:C2_04820W_A:C2_05080C_A:MAK5:C2_05160C_A:C2_05520W_A:LAS1:RTA2:C2_06850W_A:NOC4:C2_07360W_A:RCL1:PRS5:C2_07920W_A:NSA1:RRP8:PES1:RRP15:C2_09660W_A:CWC22:C2_10740C_A:C2_10810W_A:C3_00100W_A:UTP8:BUD21:SOF1:C3_00950C_A:BMS1:C3_01560W_A:C3_02020W_A:C3_02040C_A:UTP4:C3_02350W_A:C3_03070W_A:C3_03330C_A:HBR3:URK1:C3_04370C_A:C3_04380C_A:MAK21:SFP1:CEM1:C3_05160C_A:QDR2:C3_05800W_A:DED1:C3_06150W_A:C3_06370C_A:NSA2:PRP5:C3_06760W_A:NOP13:C3_07480W_A:C3_07550C_A:UTP9:DUR4:C4_00490W_A:RLP24:NMD5:C4_00690C_A:C4_00810C_A:MDN1:RAT1:C4_01280C_A:C4_02880C_A:C4_03040W_A:C4_03150W_A:C4_03720C_A:C4_03740W_A:C4_03830W_A:ECM1:C4_04510W_A:C4_05260W_A:C4_05650W_A:C4_06790W_A:C4_07060W_A:C4_07100C_A:C5_00920W_A:C5_00950C_A:BUD23:PUS4:C5_01430C_A:FYV5:SPB4:RIB2:C5_02010C_A:C5_02070C_A:RIX7:UTP13:C5_03010W_A:RMS1:C5_03670C_A:C5_03920C_A:HAS1:C5_04990W_A:C5_05340W_A:NOP5:C6_01040C_A:CIC1:C6_01890C_A:C6_02230W_A:NIP7:POP4:C6_03210C_A:ALS5:SNQ2:C7_00160C_A:C7_00330C_A:NOP15:C7_01030C_A:DBP7:C7_01360C_A:C7_02100W_A:C7_02460C_A:C7_02930C_A:ISY1:ENP2:C7_04140C_A:UTP18:CR_00460C_A:BUD22:PWP2:CR_01410C_A:CR_01700C_A:CR_01780W_A:CR_02030C_A:CR_02420W_A:RPC19:CR_02890C_A:SRP40:CR_03360W_A:KTI12:NCS2:YVH1:IFF3:CR_03940W_A:CR_04110W_A:NOC2:CR_05550C_A:RNR3:MTG2:DBP8:VPS75:SFL1:FGR50:CR_06680C_A:NMD3:CR_06840W_A:CR_07030C_A:CR_07080W_A:DBP6:IMP4:CR_08000C_A:RIO2:ATS1:CR_08330W_A:TSR1:PRP8:CR_09800C_A:UTP5:CR_10410C_A:CR_10470C_A:DRS1:POP3 |
|-----|---------------------------------------------------------------------------------------------------------------------------------------|-----------------------------------|-----------------------------------------------------|----------|-------|-----------------------------------------------------------------------------------------------------------------------------------------------------------------------------------------------------------------------------------------------------------------------------------------------------------------------------------------------------------------------------------------------------------------------------------------------------------------------------------------------------------------------------------------------------------------------------------------------------------------------------------------------------------------------------------------------------------------------------------------------------------------------------------------------------------------------------------------------------------------------------------------------------------------------------------------------------------------------------------------------------------------------------------------------------------------------------------------------------------------------------------------------------------------------------------------------------------------------------------------------------------------------------------------------------------------------------------------------------------------------------------------------------------------------------------------------------------------------------------------------------------------------------------------------------------------------------------------------------------------------------------------------------------------------------------------------------------------------------------------------------------------------------------------------------------------------------------------------------------------------------------------------------------------------------------------------------------------------------------------------------------------------------------|

|      |                                                  |                             |                                          |          |       |                                                                                                                                                                                                                                                                                                                                                                                                                                                                                                                                                                                                                                                                                                                                                                                                                                                                                                                                                                                                                                                                                                                                                                                                                                                                                                                                                                                                                                                                                                                                                                                                                                                                                                                                                                                                                                                                                                                                                                                                                                                                                                                                                                                                                                                                                                                                                                                                                                                                                                                                                                                                                                                                       |
|------|--------------------------------------------------|-----------------------------|------------------------------------------|----------|-------|-----------------------------------------------------------------------------------------------------------------------------------------------------------------------------------------------------------------------------------------------------------------------------------------------------------------------------------------------------------------------------------------------------------------------------------------------------------------------------------------------------------------------------------------------------------------------------------------------------------------------------------------------------------------------------------------------------------------------------------------------------------------------------------------------------------------------------------------------------------------------------------------------------------------------------------------------------------------------------------------------------------------------------------------------------------------------------------------------------------------------------------------------------------------------------------------------------------------------------------------------------------------------------------------------------------------------------------------------------------------------------------------------------------------------------------------------------------------------------------------------------------------------------------------------------------------------------------------------------------------------------------------------------------------------------------------------------------------------------------------------------------------------------------------------------------------------------------------------------------------------------------------------------------------------------------------------------------------------------------------------------------------------------------------------------------------------------------------------------------------------------------------------------------------------------------------------------------------------------------------------------------------------------------------------------------------------------------------------------------------------------------------------------------------------------------------------------------------------------------------------------------------------------------------------------------------------------------------------------------------------------------------------------------------------|
| 6139 | nucleobase-containing compound metabolic process | 377 out of 804 genes, 46.9% | 1659 out of 6473 background genes, 25.6% | 2.04E-41 | 0.00% | HBR1:CNS1:RRS1:C1_01150C_A:C1_01160C_A:C1_01470W_A:C1_01530C_A:C1_01900C_A:C1_02090C_A:ABP140:C1_02310C_A:C1_02440C_A:C1_02450C_A:PDE2:TSR2:ARO80:C1_03370W_A:C1_03830C_A:C1_04040C_A:C1_04120C_A:ERB1:NOP4:C1_04990C_A:RRP6:C1_05220C_A:C1_05230W_A:C1_05360C_A:RPS27A:FAL1:C1_05650W_A:NPL4:C1_06120C_A:C1_06540C_A:NOP6:C1_06760C_A:C1_06770W_A:C1_06800W_A:C1_07090C_A:RIA1:YPD1:PEX3:LHP1:C1_07510W_A:C1_07570C_A:ADE4:ADE5,7:C1_07950C_A:FUN12:GCD6:C1_08630W_A:MSS116:C1_09390W_A:GUA1:C1_09710C_A:DBP3:TPK1:C1_10620W_A:HNT1:C1_10970W_A:C1_11000C_A:C1_11370C_A:KRR1:GAR1:C1_11560C_A:C1_11900C_A:C1_11910W_A:CSI2:C1_12350W_A:C1_12440W_A:C1_12570C_A:CHR1:C1_12670C_A:C1_12760W_A:C1_13270W_A:C1_14080W_A:MPP10:FAV3:NDT80:HMA1:C2_00220C_A:C2_00280C_A:C2_00410C_A:C2_01070W_A:C2_01510C_A:C2_01870C_A:C2_02420C_A:PRS1:C2_02540W_A:C2_02710C_A:HPT1:LIG4:ADE8:PRP3:C2_03360W_A:C2_03550C_A:SCH9:C2_04120C_A:C2_04570W_A:SNU114:C2_04820W_A:CRK1:C2_05080C_A:MAK5:ERF1:C2_05160C_A:RPF2:RPC40:C2_05520W_A:KTI11:TES1:LAS1:CNT:ECM17:IMH3:RTA2:C2_06480W_A:C2_06850W_A:RPA12:NOC4:C2_07360W_A:RCL1:RNR22:PRS5:C2_07920W_A:NSA1:ORF298:C2_08460C_A:RRP8:TIF4631:RPT6:SPO11:C2_08840W_A:PEES1:RRP15:C2_09500W_A:C2_09660W_A:FCY21:CWC22:OCA1:PUS7:C2_10740C_A:RPC11:C2_10810W_A:C3_00100W_A:UTP8:BUD21:SOF1:C3_00950C_A:BMS1:URA3:C3_01560W_A:C3_02020W_A:C3_02040C_A:UTP4:C3_02350W_A:C3_03070W_A:C3_03330C_A:HBR3:URK1:C3_04370C_A:C3_04380C_A:ADE2:MAK21:SFP1:CEM1:C3_05140C_A:C3_05160C_A:WOR2:C3_05380W_A:QDR2:C3_05800W_A:C3_05860C_A:CTA4:NOG1:ELP3:DED1:C3_06150W_A:HNT2:C3_06370C_A:NSA2:PRP5:C3_06760W_A:C3_06940W_A:NOP13:C3_07400W_A:C3_07480W_A:C3_07550C_A:RIT1:UTP9:DUR4:C4_00490W_A:RLP24:NMD5:C4_00690C_A:C4_00700C_A:C4_00810C_A:C4_00940W_A:MDN1:RAT1:C4_01280C_A:PWP1:C4_01670C_A:TOA2:C4_02850W_A:ZUO1:C4_02880C_A:C4_03040W_A:C4_03150W_A:C4_03720C_A:C4_03730C_A:C4_03740W_A:C4_03830W_A:RRP42:RAM1:ECM1:C4_04510W_A:SSZ1:C4_04720W_A:C4_04810C_A:AGP3:NBP35:C4_05260W_A:C4_05650W_A:C4_06210C_A:C4_06410W_A:NOP1:C4_06790W_A:C4_07060W_A:C4_07100C_A:C5_00260W_A:C5_00280C_A:DUS4:RMT2:URA4:C5_00920W_A:C5_00950C_A:BUD23:PUS4:C5_01430C_A:FYV5:SPB4:C5_01610W_A:C5_01930W_A:RIB2:C5_02010C_A:C5_02070C_A:RIX7:TIF5:UTP13:C5_02730C_A:C5_03010W_A:RMS1:RPO26:FUR1:C5_03670C_A:FGR27:HAM1:C5_03920C_A:URA7:C5_04610W_A:HAS1:C5_04990W_A:C5_05340W_A:NOP5:C6_00530C_A:C6_00640C_A:C6_01040C_A:RCN1:CIC1:C6_01890C_A:C6_02230W_A:C6_02350C_A:NIP7:C6_02410W_A:C6_02560W_A:MRT4:POP4:C6_03210C_A:C6_03390W_A:FGR17:ALS5:SBA1:SNQ2:SPB1:C6_04530C_A:C7_00160C_A:C7_00330C_A:RPA135:NOP15:C7_01030C_A:DBP7:C7_01360C_A:FLU1:RAD14:C7_02100 |
|------|--------------------------------------------------|-----------------------------|------------------------------------------|----------|-------|-----------------------------------------------------------------------------------------------------------------------------------------------------------------------------------------------------------------------------------------------------------------------------------------------------------------------------------------------------------------------------------------------------------------------------------------------------------------------------------------------------------------------------------------------------------------------------------------------------------------------------------------------------------------------------------------------------------------------------------------------------------------------------------------------------------------------------------------------------------------------------------------------------------------------------------------------------------------------------------------------------------------------------------------------------------------------------------------------------------------------------------------------------------------------------------------------------------------------------------------------------------------------------------------------------------------------------------------------------------------------------------------------------------------------------------------------------------------------------------------------------------------------------------------------------------------------------------------------------------------------------------------------------------------------------------------------------------------------------------------------------------------------------------------------------------------------------------------------------------------------------------------------------------------------------------------------------------------------------------------------------------------------------------------------------------------------------------------------------------------------------------------------------------------------------------------------------------------------------------------------------------------------------------------------------------------------------------------------------------------------------------------------------------------------------------------------------------------------------------------------------------------------------------------------------------------------------------------------------------------------------------------------------------------------|

|  |  |  |  |  |  |                                                                                                                                                                                                                                                                                                                                                                                                                                                                                                                                                                                                                                                                                                                   |
|--|--|--|--|--|--|-------------------------------------------------------------------------------------------------------------------------------------------------------------------------------------------------------------------------------------------------------------------------------------------------------------------------------------------------------------------------------------------------------------------------------------------------------------------------------------------------------------------------------------------------------------------------------------------------------------------------------------------------------------------------------------------------------------------|
|  |  |  |  |  |  | W_A:C7_02340C_A:C7_02460C_A:C7_02930C_A:ZCF29:ISY1:ENP2:C7_03990C_A:C7_04140C_A:UTP18:CR_00460C_A:CR_00670C_A:BUD22:PWP2:TRM1:CAB3:CR_01410C_A:CR_01700C_A:CR_01780W_A:CR_01950W_A:CR_02030C_A:CR_02420W_A:RPC19:DBP2:RPC31:CR_02890C_A:SRP40:CR_03110W_A:CR_03230W_A:CR_03360W_A:KTI12:NCS2:YVH1:IFF3:SGD1:PRP42:CR_03940W_A:CR_04110W_A:CR_04160C_A:CR_04170W_A:CR_04240C_A:CR_04300W_A:NHP2:ADE6:RPB8:NOC2:CR_05550C_A:RNR3:MTG2:DBP8:VPS75:SFL1:RPL7:FGR50:CR_06680C_A:NMD3:CR_06840W_A:CR_07030C_A:CR_07080W_A:CR_07640C_A:DBP6:IMP4:CR_08000C_A:NOP10:SB1:RIO2:TRM9:ATS1:CR_08330W_A:TSR1:PRP8:CR_08940W_A:CR_09110C_A:CR_09140C_A:SSF1:CR_09800C_A:SIK1:UTP5:CR_10410C_A:CR_10430C_A:CR_10470C_A:DRS1:POP3 |
|--|--|--|--|--|--|-------------------------------------------------------------------------------------------------------------------------------------------------------------------------------------------------------------------------------------------------------------------------------------------------------------------------------------------------------------------------------------------------------------------------------------------------------------------------------------------------------------------------------------------------------------------------------------------------------------------------------------------------------------------------------------------------------------------|

|           |                                          |                                   |                                                       |          |       |                                                                                                                                                                                                                                                                                                                                                                                                                                                                                                                                                                                                                                                                                                                                                                                                                                                                                                                                                                                                                                                                                                                                                                                                                                                                                                                                                                                                                                                                                                                                                                                                                                                                                                                                                                                                                                                                                                                                                                                                                                                                                                                                                                                                                                                                                                                                                                                                                                                                                                                                                                                                                                                                      |
|-----------|------------------------------------------|-----------------------------------|-------------------------------------------------------|----------|-------|----------------------------------------------------------------------------------------------------------------------------------------------------------------------------------------------------------------------------------------------------------------------------------------------------------------------------------------------------------------------------------------------------------------------------------------------------------------------------------------------------------------------------------------------------------------------------------------------------------------------------------------------------------------------------------------------------------------------------------------------------------------------------------------------------------------------------------------------------------------------------------------------------------------------------------------------------------------------------------------------------------------------------------------------------------------------------------------------------------------------------------------------------------------------------------------------------------------------------------------------------------------------------------------------------------------------------------------------------------------------------------------------------------------------------------------------------------------------------------------------------------------------------------------------------------------------------------------------------------------------------------------------------------------------------------------------------------------------------------------------------------------------------------------------------------------------------------------------------------------------------------------------------------------------------------------------------------------------------------------------------------------------------------------------------------------------------------------------------------------------------------------------------------------------------------------------------------------------------------------------------------------------------------------------------------------------------------------------------------------------------------------------------------------------------------------------------------------------------------------------------------------------------------------------------------------------------------------------------------------------------------------------------------------------|
| 9030<br>4 | nucleic<br>acid<br>metaboli<br>c process | 352 out of<br>804 genes,<br>43.8% | 1509 out of<br>6473<br>backgroun<br>d genes,<br>23.3% | 2.73E-40 | 0.00% | HBR1:CNS1:RRS1:C1_01150C_A:C1_01160C_A:C1_01470W_A:C1_01530C_A:C1_01900C_A:C1_02090C_A:ABP140:C1_02310C_A:C1_02440C_A:C1_02450C_A:PDE2:TSR2:ARO80:C1_03370W_A:C1_03830C_A:C1_04040C_A:C1_04120C_A:ERB1:NOP4:C1_04990C_A:RRP6:C1_05220C_A:C1_05230W_A:C1_05360C_A:RPS27A:FAL1:C1_05650W_A:NPL4:C1_06120C_A:C1_06540C_A:NOP6:C1_06760C_A:C1_06770W_A:C1_06800W_A:C1_07090C_A:RIA1:YPD1:PEX3:LHP1:C1_07510W_A:C1_07570C_A:C1_07950C_A:FUN12:GCD6:C1_08630W_A:MSS116:C1_09390W_A:C1_09710C_A:DBP3:TPK1:C1_10620W_A:C1_10970W_A:C1_11000C_A:C1_11370C_A:KRR1:GAR1:C1_11560C_A:C1_11900C_A:C1_11910W_A:CSI2:C1_12350W_A:C1_12440W_A:C1_12570C_A:CHR1:C1_12670C_A:C1_12760W_A:C1_14080W_A:MPP10:FAV3:NDT80:HMA1:C2_00220C_A:C2_00280C_A:C2_00410C_A:C2_01070W_A:C2_01510C_A:C2_01870C_A:C2_02420C_A:PRS1:C2_02540W_A:C2_02710C_A:LIG4:PRP3:C2_03550C_A:SCH9:C2_04120C_A:C2_04570W_A:SNU114:C2_04820W_A:CRK1:C2_05080C_A:MAK5:ERF1:C2_05160C_A:RPF2:RPC40:C2_05520W_A:KTI11:TES1:LAS1:CNT:ECM17:RTA2:C2_06480W_A:C2_06850W_A:RPA12:NOC4:C2_07360W_A:RCL1:PRS5:C2_07920W_A:NSA1:ORF298:RRP8:TIF4631:RPT6:SPO11:C2_08840W_A:PES1:RRP15:C2_09500W_A:C2_09660W_A:CWC22:OCA1:PUS7:C2_10740C_A:RPC11:C2_10810W_A:C3_00100W_A:UTP8:BUD21:SOF1:C3_00950C_A:BMS1:C3_01560W_A:C3_02020W_A:C3_02040C_A:UTP4:C3_02350W_A:C3_03070W_A:C3_03330C_A:HBR3:URK1:C3_04370C_A:C3_04380C_A:MAK21:SFP1:CEM1:C3_05140C_A:C3_05160C_A:WOR2:C3_05380W_A:QDR2:C3_05800W_A:C3_05860C_A:CTA4:NOG1:ELP3:DED1:C3_06150W_A:C3_06370C_A:NSA2:PRP5:C3_06760W_A:C3_06940W_A:NOP13:C3_07400W_A:C3_07480W_A:C3_07550C_A:RIT1:UTP9:DUR4:C4_00490W_A:RLP24:NMD5:C4_00690C_A:C4_00700C_A:C4_00810C_A:C4_00940W_A:MDN1:RAT1:C4_01280C_A:PWP1:C4_01670C_A:TOA2:C4_02850W_A:ZUO1:C4_02880C_A:C4_03040W_A:C4_03150W_A:C4_03720C_A:C4_03730C_A:C4_03740W_A:C4_03830W_A:RRP42:RAM1:ECM1:C4_04510W_A:SSZ1:C4_04810C_A:AGP3:NBP35:C4_05260W_A:C4_05650W_A:C4_06210C_A:C4_06410W_A:NOP1:C4_06790W_A:C4_07060W_A:C4_07100C_A:C5_00280C_A:DUS4:RMT2:C5_00920W_A:C5_00950C_A:BUD23:PUS4:C5_01430C_A:FYV5:SPB4:C5_01610W_A:C5_01930W_A:RIB2:C5_02010C_A:C5_02070C_A:RIX7:TIF5:UTP13:C5_02730C_A:C5_03010W_A:RMS1:RPO26:C5_03670C_A:FR27:C5_03920C_A:C5_04610W_A:HAS1:C5_04990W_A:C5_05340W_A:NOP5:C6_00530C_A:C6_00640C_A:C6_01040C_A:RCN1:CIC1:C6_01890C_A:C6_02230W_A:C6_02350C_A:NIP7:MRT4:POP4:C6_03210C_A:C6_03390W_A:FGR17:ALS5:SBA1:SNQ2:SPB1:C6_04530C_A:C7_00160C_A:C7_00330C_A:RPA135:NOP15:C7_01030C_A:DBP7:C7_01360C_A:FLU1:RAD14:C7_02100W_A:C7_02340C_A:C7_02460C_A:C7_02930C_A:ZCF29:ISY1:ENP2:C7_03990C_A:C7_04140C_A:UTP18:CR_00460C_A:CR_00670C_A:BUD22:PWP2:TRM1:CR_01410C_A:CR_01700C_A:CR_01780W_A:CR_0195 |
|-----------|------------------------------------------|-----------------------------------|-------------------------------------------------------|----------|-------|----------------------------------------------------------------------------------------------------------------------------------------------------------------------------------------------------------------------------------------------------------------------------------------------------------------------------------------------------------------------------------------------------------------------------------------------------------------------------------------------------------------------------------------------------------------------------------------------------------------------------------------------------------------------------------------------------------------------------------------------------------------------------------------------------------------------------------------------------------------------------------------------------------------------------------------------------------------------------------------------------------------------------------------------------------------------------------------------------------------------------------------------------------------------------------------------------------------------------------------------------------------------------------------------------------------------------------------------------------------------------------------------------------------------------------------------------------------------------------------------------------------------------------------------------------------------------------------------------------------------------------------------------------------------------------------------------------------------------------------------------------------------------------------------------------------------------------------------------------------------------------------------------------------------------------------------------------------------------------------------------------------------------------------------------------------------------------------------------------------------------------------------------------------------------------------------------------------------------------------------------------------------------------------------------------------------------------------------------------------------------------------------------------------------------------------------------------------------------------------------------------------------------------------------------------------------------------------------------------------------------------------------------------------------|

|  |  |  |  |  |  |                                                                                                                                                                                                                                                                                                                                                                                                                                                                                                                                 |
|--|--|--|--|--|--|---------------------------------------------------------------------------------------------------------------------------------------------------------------------------------------------------------------------------------------------------------------------------------------------------------------------------------------------------------------------------------------------------------------------------------------------------------------------------------------------------------------------------------|
|  |  |  |  |  |  | OW_A:CR_02030C_A:CR_02420W_A:RPC19:DBP2:RPC31:CR_02890C_A:SRP40:CR_03110W_A:CR_03230W_A:CR_03360W_A:KTI12:NCS2:YVH1:IFF3:SGD1:PRP42:CR_03940W_A:CR_04110W_A:CR_04160C_A:CR_04170W_A:CR_04240C_A:CR_04300W_A:NHP2:RPB8:NOC2:CR_05550C_A:RNR3:MTG2:DBP8:VPS75:SFL1:RPL7:FGR50:CR_06680C_A:NMD3:CR_06840W_A:CR_07030C_A:CR_07080W_A:CR_07640C_A:DBP6:IMP4:CR_08000C_A:NOP10:SSB1:RIO2:TRM9:ATS1:CR_08330W_A:TSR1:PRP8:CR_08940W_A:CR_09110C_A:CR_09140C_A:SSF1:CR_09800C_A:SIK1:UTP5:CR_10410C_A:CR_10430C_A:CR_10470C_A:DRS1:POP3 |
|--|--|--|--|--|--|---------------------------------------------------------------------------------------------------------------------------------------------------------------------------------------------------------------------------------------------------------------------------------------------------------------------------------------------------------------------------------------------------------------------------------------------------------------------------------------------------------------------------------|

|       |                                    |                             |                                        |          |       |                                                                                                                                                                                                                                                                                                                                                                                                                                                                                                                                                                                                                                                                                                                                                                                                                                                                                                                                                                                                                                                                                                                                                                                                                                                                                                                                                                                                                                                                                                                                                                                                                                                                                                     |
|-------|------------------------------------|-----------------------------|----------------------------------------|----------|-------|-----------------------------------------------------------------------------------------------------------------------------------------------------------------------------------------------------------------------------------------------------------------------------------------------------------------------------------------------------------------------------------------------------------------------------------------------------------------------------------------------------------------------------------------------------------------------------------------------------------------------------------------------------------------------------------------------------------------------------------------------------------------------------------------------------------------------------------------------------------------------------------------------------------------------------------------------------------------------------------------------------------------------------------------------------------------------------------------------------------------------------------------------------------------------------------------------------------------------------------------------------------------------------------------------------------------------------------------------------------------------------------------------------------------------------------------------------------------------------------------------------------------------------------------------------------------------------------------------------------------------------------------------------------------------------------------------------|
| 42273 | ribosomal large subunit biogenesis | 185 out of 804 genes, 23.0% | 546 out of 6473 background genes, 8.4% | 2.81E-40 | 0.00% | RRS1:C1_02090C_A:C1_02450C_A:PDE2:RPL6:C1_03830C_A:C1_04040C_A:C1_04120C_A:ERB1:NOP4:RRP6:C1_05220C_A:C1_05360C_A:C1_05650W_A:C1_06540C_A:NOP6:C1_06760C_A:C1_06800W_A:C1_07090C_A:RIA1:YPD1:PEX3:C1_07510W_A:C1_07570C_A:C1_08630W_A:JIP5:C1_09390W_A:YTM1:C1_09710C_A:DBP3:TPK1:C1_10970W_A:C1_11000C_A:C1_11560C_A:C1_11900C_A:C1_11910W_A:CSI2:C1_12350W_A:C1_12440W_A:C1_12570C_A:CHR1:C1_12760W_A:C1_13370W_A:C1_14080W_A:C2_00280C_A:C2_01070W_A:C2_02540W_A:PRP3:SCH9:C2_04120C_A:C2_04570W_A:SNU114:MAK5:C2_05160C_A:RPF2:TES1:LAS1:CNT:ECM17:RPL11:C2_06850W_A:NSA1:RRP8:TIF4631:C2_08840W_A:PES1:RRP15:C2_09660W_A:CWC22:OCA1:C2_10740C_A:C3_00950C_A:BMS1:C3_01560W_A:C3_02040C_A:C3_02350W_A:C3_03330C_A:URK1:C3_04370C_A:MAK21:SFP1:CEM1:C3_05160C_A:C3_05380W_A:QDR2:C3_05800W_A:C3_05860C_A:NOG1:C3_06150W_A:C3_06370C_A:NSA2:PRP5:C3_07550C_A:DUR4:RLP24:NMD5:MDN1:RAT1:C4_01280C_A:C4_01670C_A:C4_02880C_A:C4_03150W_A:C4_03720C_A:C4_03830W_A:RAM1:AGP3:C4_05010W_A:C4_05260W_A:C4_06210C_A:C4_06410W_A:C4_06790W_A:C4_07060W_A:C4_07100C_A:RMT2:C5_00920W_A:C5_01430C_A:SPB4:C5_01930W_A:C5_02010C_A:RIX7:C5_03010W_A:RMS1:C5_03670C_A:C5_03920C_A:C5_04610W_A:HAS1:C5_04990W_A:C5_05340W_A:RCN1:CIC1:C6_01890C_A:C6_02230W_A:NIP7:MRT4:C6_03210C_A:C6_03390W_A:ALS5:SNQ2:SPB1:C7_00160C_A:RPA135:NOP15:DBP7:C7_01360C_A:FLU1:C7_02460C_A:C7_02930C_A:ISY1:ENP2:UTP18:BUD22:PWP2:CR_01410C_A:CR_01700C_A:CR_02030C_A:RPC19:CR_02890C_A:CR_03360W_A:YVH1:SGD1:PRP42:CR_03940W_A:CR_04170W_A:NOC2:CR_05550C_A:RNR3:SDA1:VP575:SFL1:RPL7:CR_06680C_A:CR_07080W_A:CR_07640C_A:DBP6:CR_08000C_A:CR_08330W_A:TSR1:CR_08500W_A:PRP8:CR_09110C_A:ELF1:SSF1:CR_09800C_A:CR_10470C_A:DRS1 |
|-------|------------------------------------|-----------------------------|----------------------------------------|----------|-------|-----------------------------------------------------------------------------------------------------------------------------------------------------------------------------------------------------------------------------------------------------------------------------------------------------------------------------------------------------------------------------------------------------------------------------------------------------------------------------------------------------------------------------------------------------------------------------------------------------------------------------------------------------------------------------------------------------------------------------------------------------------------------------------------------------------------------------------------------------------------------------------------------------------------------------------------------------------------------------------------------------------------------------------------------------------------------------------------------------------------------------------------------------------------------------------------------------------------------------------------------------------------------------------------------------------------------------------------------------------------------------------------------------------------------------------------------------------------------------------------------------------------------------------------------------------------------------------------------------------------------------------------------------------------------------------------------------|

|       |                               |                             |                                          |          |       |                                                                                                                                                                                                                                                                                                                                                                                                                                                                                                                                                                                                                                                                                                                                                                                                                                                                                                                                                                                                                                                                                                                                                                                                                                                                                                                                                                                                                                                                                                                                                                                                                                                                                                                                                                                                                                                                                                                                                                                                                                                                                                                                                                                                                                                                                                                                                                                                                                                                                                                                                                                                                                                                        |
|-------|-------------------------------|-----------------------------|------------------------------------------|----------|-------|------------------------------------------------------------------------------------------------------------------------------------------------------------------------------------------------------------------------------------------------------------------------------------------------------------------------------------------------------------------------------------------------------------------------------------------------------------------------------------------------------------------------------------------------------------------------------------------------------------------------------------------------------------------------------------------------------------------------------------------------------------------------------------------------------------------------------------------------------------------------------------------------------------------------------------------------------------------------------------------------------------------------------------------------------------------------------------------------------------------------------------------------------------------------------------------------------------------------------------------------------------------------------------------------------------------------------------------------------------------------------------------------------------------------------------------------------------------------------------------------------------------------------------------------------------------------------------------------------------------------------------------------------------------------------------------------------------------------------------------------------------------------------------------------------------------------------------------------------------------------------------------------------------------------------------------------------------------------------------------------------------------------------------------------------------------------------------------------------------------------------------------------------------------------------------------------------------------------------------------------------------------------------------------------------------------------------------------------------------------------------------------------------------------------------------------------------------------------------------------------------------------------------------------------------------------------------------------------------------------------------------------------------------------------|
| 46483 | heterocycle metabolic process | 385 out of 804 genes, 47.9% | 1733 out of 6473 background genes, 26.8% | 5.20E-40 | 0.00% | RIM8:HBR1:CNS1:RRS1:HMT1:C1_01150C_A:C1_01160C_A:C1_01470W_A:C1_01530C_A:C1_01900C_A:C1_02090C_A:ABP140:C1_02310C_A:C1_02440C_A:C1_02450C_A:PDE2:TSR2:ARO80:C1_03370W_A:C1_03830C_A:C1_04040C_A:C1_04120C_A:ERB1:NOP4:C1_04990C_A:RRP6:C1_05220C_A:C1_05230W_A:C1_05360C_A:RPS27A:RIB4:FAL1:C1_05650W_A:NPL4:C1_06120C_A:C1_06540C_A:NOP6:C1_06760C_A:C1_06770W_A:C1_06800W_A:C1_07090C_A:RIA1:YMC1:YPD1:PEX3:LHP1:C1_07510W_A:C1_07570C_A:ADE4:ADE5,7:C1_07950C_A:FUN12:GCD6:C1_08630W_A:MSS116:C1_09390W_A:GUA1:C1_09710C_A:DBP3:TPK1:C1_10620W_A:HNT1:C1_10970W_A:C1_11000C_A:C1_11370C_A:KRR1:GAR1:C1_11560C_A:C1_11900C_A:C1_11910W_A:CSI2:C1_12350W_A:C1_12440W_A:C1_12570C_A:CHR1:C1_12670C_A:C1_12760W_A:C1_13270W_A:C1_14080W_A:MPP10:FAV3:NDT80:HMA1:C2_00220C_A:C2_00280C_A:C2_00410C_A:C2_01070W_A:C2_01510C_A:C2_01870C_A:C2_02420C_A:PRS1:C2_02540W_A:C2_02710C_A:HPT1:LIG4:ADE8:PRP3:C2_03360W_A:C2_03550C_A:SCH9:C2_04120C_A:C2_04570W_A:SNU114:C2_04820W_A:CRK1:C2_05080C_A:MAK5:ERF1:C2_05160C_A:RPF2:RPC40:C2_05520W_A:KTI11:TES1:LAS1:CNT:ECM17:IMH3:RTA2:C2_06480W_A:C2_06850W_A:RPA12:NOC4:C2_07360W_A:RCL1:RNR22:PRS5:C2_07920W_A:NSA1:ORF298:C2_08460C_A:RRP8:TIF4631:RPT6:SPO11:C2_08840W_A:PES1:RRP15:C2_09500W_A:C2_09660W_A:FCY21:CWC22:OCA1:PUS7:C2_10740C_A:RPC11:C2_10810W_A:C3_00100W_A:UTP8:BUD21:SOF1:C3_00950C_A:BMS1:URA3:C3_01560W_A:C3_02020W_A:C3_02040C_A:UTP4:C3_02350W_A:C3_03070W_A:C3_03330C_A:HBR3:URK1:C3_04370C_A:C3_04380C_A:ADE2:MAK21:SFP1:CEM1:C3_05140C_A:C3_05160C_A:WOR2:C3_05380W_A:QDR2:C3_05800W_A:C3_05860C_A:CTA4:NOG1:ELP3:DED1:C3_06150W_A:HNT2:C3_06370C_A:NSA2:PRP5:C3_06760W_A:C3_06940W_A:NOP13:C3_07400W_A:C3_07480W_A:C3_07550C_A:RIT1:UTP9:DUR4:C4_00490W_A:RLP24:NMD5:C4_00690C_A:C4_00700C_A:C4_00810C_A:C4_00940W_A:MDN1:RAT1:C4_01280C_A:PWP1:C4_01670C_A:TOA2:C4_02850W_A:ZUO1:C4_02880C_A:C4_03040W_A:C4_03150W_A:C4_03720C_A:C4_03730C_A:C4_03740W_A:C4_03830W_A:RRP42:RAM1:ECM1:C4_04270W_A:C4_04510W_A:SSZ1:C4_04720W_A:C4_04810C_A:AGP3:NBP35:C4_05260W_A:C4_05650W_A:C4_06210C_A:C4_06410W_A:NOP1:C4_06790W_A:C4_07060W_A:C4_07100C_A:C5_00260W_A:C5_00280C_A:DUS4:RMT2:URA4:C5_00920W_A:C5_00950C_A:BUD23:PUS4:C5_01430C_A:FYV5:SPB4:C5_01610W_A:C5_01930W_A:RIB2:C5_02010C_A:C5_02070C_A:RIX7:TIF5:UTP13:C5_02730C_A:C5_03010W_A:RMS1:RPO26:FUR1:C5_03670C_A:FGR27:HAM1:C5_03920C_A:URA7:C5_04610W_A:HAS1:C5_04990W_A:C5_05340W_A:NOP5:C6_00530C_A:C6_00640C_A:C6_01040C_A:RCN1:CIC1:C6_01890C_A:C6_02230W_A:C6_02350C_A:NIP7:C6_02410W_A:C6_02560W_A:MRT4:POP4:C6_03210C_A:C6_03390W_A:FGR17:ALS5:SBA1:SHM2:SNQ2:SPB1:C6_04530C_A:C7_00160C_A:C7_00330C_A:RPA135:NOP15:C7_01030C_A:D |
|-------|-------------------------------|-----------------------------|------------------------------------------|----------|-------|------------------------------------------------------------------------------------------------------------------------------------------------------------------------------------------------------------------------------------------------------------------------------------------------------------------------------------------------------------------------------------------------------------------------------------------------------------------------------------------------------------------------------------------------------------------------------------------------------------------------------------------------------------------------------------------------------------------------------------------------------------------------------------------------------------------------------------------------------------------------------------------------------------------------------------------------------------------------------------------------------------------------------------------------------------------------------------------------------------------------------------------------------------------------------------------------------------------------------------------------------------------------------------------------------------------------------------------------------------------------------------------------------------------------------------------------------------------------------------------------------------------------------------------------------------------------------------------------------------------------------------------------------------------------------------------------------------------------------------------------------------------------------------------------------------------------------------------------------------------------------------------------------------------------------------------------------------------------------------------------------------------------------------------------------------------------------------------------------------------------------------------------------------------------------------------------------------------------------------------------------------------------------------------------------------------------------------------------------------------------------------------------------------------------------------------------------------------------------------------------------------------------------------------------------------------------------------------------------------------------------------------------------------------------|



|  |  |  |  |  |  |                                                                                                                                                                                                                                                                                                                                                                                                                                                                                                                                                                                                                                                                                                                                                                         |
|--|--|--|--|--|--|-------------------------------------------------------------------------------------------------------------------------------------------------------------------------------------------------------------------------------------------------------------------------------------------------------------------------------------------------------------------------------------------------------------------------------------------------------------------------------------------------------------------------------------------------------------------------------------------------------------------------------------------------------------------------------------------------------------------------------------------------------------------------|
|  |  |  |  |  |  | BP7:C7_01360C_A:FLU1:RAD14:C7_02100W_A:C7_02340C_A:C7_02460C_A:C7_02930C_A:ZCF29:ISY1:ENP2:C7_03990C_A:C7_04140C_A:UTP18:MIS12:CR_00460C_A:CR_00670C_A:BUD22:PWP2:TRM1:CAB3:CR_01410C_A:CR_01700C_A:CR_01780W_A:CR_01950W_A:CR_02030C_A:CR_02420W_A:RPC19:DBP2:RPC31:CR_02890C_A:SRP40:CR_03110W_A:CR_03230W_A:CR_03360W_A:KTI12:NCS2:YVH1:IFF3:SGD1:PRP42:CR_03940W_A:CR_04110W_A:CR_04160C_A:CR_04170W_A:CR_04240C_A:CR_04300W_A:NHP2:ADE6:RPB8:CR_04920W_A:NOC2:CR_05550C_A:RNR3:MTG2:DBP8:VPS75:SFL1:RPL7:FGR50:CR_06680C_A:NMD3:CR_06840W_A:CR_07030C_A:CR_07080W_A:CR_07640C_A:DBP6:IMP4:CR_08000C_A:NOP10:SSB1:RIO2:TRM9:ATS1:CR_08330W_A:TSR1:PRP8:CR_08940W_A:CR_09110C_A:CR_09140C_A:SSF1:CR_09800C_A:SIK1:UTP5:CR_10410C_A:CR_10430C_A:CR_10470C_A:DRS1:POP3 |
|--|--|--|--|--|--|-------------------------------------------------------------------------------------------------------------------------------------------------------------------------------------------------------------------------------------------------------------------------------------------------------------------------------------------------------------------------------------------------------------------------------------------------------------------------------------------------------------------------------------------------------------------------------------------------------------------------------------------------------------------------------------------------------------------------------------------------------------------------|

|      |                                              |                             |                                          |          |       |                                                                                                                                                                                                                                                                                                                                                                                                                                                                                                                                                                                                                                                                                                                                                                                                                                                                                                                                                                                                                                                                                                                                                                                                                                                                                                                                                                                                                                                                                                                                                                                                                                                                                                                                                                                                                                                                                                                                                                                                                                                                                                                                                                                                                                                                                                                                                                                                                                                                                                                                                                                                                                                            |
|------|----------------------------------------------|-----------------------------|------------------------------------------|----------|-------|------------------------------------------------------------------------------------------------------------------------------------------------------------------------------------------------------------------------------------------------------------------------------------------------------------------------------------------------------------------------------------------------------------------------------------------------------------------------------------------------------------------------------------------------------------------------------------------------------------------------------------------------------------------------------------------------------------------------------------------------------------------------------------------------------------------------------------------------------------------------------------------------------------------------------------------------------------------------------------------------------------------------------------------------------------------------------------------------------------------------------------------------------------------------------------------------------------------------------------------------------------------------------------------------------------------------------------------------------------------------------------------------------------------------------------------------------------------------------------------------------------------------------------------------------------------------------------------------------------------------------------------------------------------------------------------------------------------------------------------------------------------------------------------------------------------------------------------------------------------------------------------------------------------------------------------------------------------------------------------------------------------------------------------------------------------------------------------------------------------------------------------------------------------------------------------------------------------------------------------------------------------------------------------------------------------------------------------------------------------------------------------------------------------------------------------------------------------------------------------------------------------------------------------------------------------------------------------------------------------------------------------------------------|
| 6725 | cellular aromatic compound metabolic process | 384 out of 804 genes, 47.8% | 1727 out of 6473 background genes, 26.7% | 5.91E-40 | 0.00% | HBR1:CNS1:RRS1:HMT1:C1_01150C_A:C1_01160C_A:C1_01470W_A:C1_01530C_A:C1_01900C_A:C1_02090C_A:ABP140:C1_02310C_A:C1_02440C_A:C1_02450C_A:PDE2:TSR2:ARO80:C1_03370W_A:C1_03830C_A:C1_04040C_A:C1_04120C_A:ERB1:NOP4:C1_04990C_A:RRP6:C1_05220C_A:C1_05230W_A:C1_05360C_A:RPS27A:FAL1:C1_05650W_A:NPL4:C1_06120C_A:C1_06540C_A:NOP6:C1_06760C_A:C1_06770W_A:C1_06800W_A:C1_07090C_A:RIA1:YMC1:YPD1:PEX3:LHP1:C1_07510W_A:C1_07570C_A:ADE4:ADE5,7:C1_07950C_A:FUN12:GCD6:C1_08630W_A:MSS116:C1_09390W_A:GUA1:C1_09710C_A:DBP3:TPK1:C1_10620W_A:HNT1:C1_10970W_A:C1_11000C_A:C1_11370C_A:KRR1:GAR1:C1_11560C_A:C1_11900C_A:C1_11910W_A:C1_12350W_A:C1_12440W_A:C1_12570C_A:CHR1:C1_12670C_A:C1_12760W_A:C1_13270W_A:C1_14080W_A:MPP10:FAV3:NDT80:HMA1:C2_00220C_A:C2_00280C_A:C2_00410C_A:C2_01070W_A:C2_01510C_A:C2_01870C_A:C2_02420C_A:PRS1:C2_02540W_A:C2_02710C_A:HPT1:LIG4:ADE8:PRP3:C2_03360W_A:C2_03550C_A:SCH9:C2_04120C_A:C2_04570W_A:SNU114:C2_04820W_A:CRK1:C2_05080C_A:MAK5:ERF1:C2_05160C_A:RPF2:RPC40:C2_05520W_A:KTI11:TES1:LAS1:CNT:ECM17:IMH3:RTA2:C2_06480W_A:C2_06850W_A:RPA12:NOC4:C2_07360W_A:RCL1:RNR2:PRS5:C2_07920W_A:NSA1:ORF298:C2_08460C_A:RRP8:TIF4631:RPT6:SPO11:C2_08840W_A:PES1:RRP15:C2_09500W_A:C2_09660W_A:FCY21:CWC22:OCA1:PUS7:C2_10740C_A:RPC11:C2_10810W_A:C3_00100W_A:UTP8:BUD21:SOF1:C3_00950C_A:BMS1:URA3:C3_01560W_A:C3_02020W_A:C3_02040C_A:UTP4:C3_02350W_A:PHA2:C3_03070W_A:C3_03330C_A:HBR3:URK1:C3_04370C_A:C3_04380C_A:ADE2:MAK21:SFP1:CEM1:C3_05140C_A:C3_05160C_A:WOR2:C3_05380W_A:QDR2:C3_05800W_A:C3_05860C_A:CTA4:NOG1:ELP3:DED1:C3_06150W_A:HNT2:C3_06370C_A:NSA2:PRP5:C3_06760W_A:C3_06940W_A:NOP13:C3_07400W_A:C3_07480W_A:C3_07550C_A:RIT1:UTP9:DUR4:C4_00490W_A:RLP24:NMD5:C4_00690C_A:C4_00700C_A:C4_00810C_A:C4_00940W_A:MDN1:RAT1:C4_01280C_A:PWP1:C4_01670C_A:TOA2:C4_02850W_A:ZUO1:C4_02880C_A:C4_03040W_A:C4_03150W_A:C4_03720C_A:C4_03730C_A:C4_03740W_A:C4_03830W_A:RRP42:RAM1:ECM1:C4_04510W_A:SSZ1:C4_04720W_A:C4_04810C_A:AGP3:NBP35:C4_05260W_A:C4_05650W_A:C4_06210C_A:C4_06410W_A:NOP1:C4_06790W_A:C4_07060W_A:C4_07100C_A:C5_00260W_A:C5_00280C_A:DUS4:RMT2:URA4:C5_00920W_A:C5_00950C_A:BUD23:PUS4:C5_01430C_A:FYV5:SPB4:C5_01610W_A:C5_01930W_A:RIB2:C5_02010C_A:C5_02070C_A:RIX7:TIF5:UTP13:C5_02730C_A:C5_03010W_A:RMS1:RPO26:FUR1:C5_03670C_A:FGR27:HAM1:C5_03920C_A:URA7:C5_04610W_A:HAS1:C5_04990W_A:C5_05340W_A:NOP5:C6_00530C_A:C6_00640C_A:C6_01040C_A:RCN1:CIC1:C6_01890C_A:C6_02230W_A:C6_02350C_A:NIP7:C6_02410W_A:C6_02560W_A:MR4:POP4:C6_03210C_A:C6_03390W_A:FGR17:PAD1:ALS5:SBA1:SHM2:SNQ2:SPB1:C6_04530C_A:C7_00160C_A:C7_00330C_A:RPA135:NOP15:C7_01030C_A:DBP7:C7_ |
|------|----------------------------------------------|-----------------------------|------------------------------------------|----------|-------|------------------------------------------------------------------------------------------------------------------------------------------------------------------------------------------------------------------------------------------------------------------------------------------------------------------------------------------------------------------------------------------------------------------------------------------------------------------------------------------------------------------------------------------------------------------------------------------------------------------------------------------------------------------------------------------------------------------------------------------------------------------------------------------------------------------------------------------------------------------------------------------------------------------------------------------------------------------------------------------------------------------------------------------------------------------------------------------------------------------------------------------------------------------------------------------------------------------------------------------------------------------------------------------------------------------------------------------------------------------------------------------------------------------------------------------------------------------------------------------------------------------------------------------------------------------------------------------------------------------------------------------------------------------------------------------------------------------------------------------------------------------------------------------------------------------------------------------------------------------------------------------------------------------------------------------------------------------------------------------------------------------------------------------------------------------------------------------------------------------------------------------------------------------------------------------------------------------------------------------------------------------------------------------------------------------------------------------------------------------------------------------------------------------------------------------------------------------------------------------------------------------------------------------------------------------------------------------------------------------------------------------------------------|

|  |  |  |  |  |  |                                                                                                                                                                                                                                                                                                                                                                                                                                                                                                                                                                                                                                                                                                                                                                                                          |
|--|--|--|--|--|--|----------------------------------------------------------------------------------------------------------------------------------------------------------------------------------------------------------------------------------------------------------------------------------------------------------------------------------------------------------------------------------------------------------------------------------------------------------------------------------------------------------------------------------------------------------------------------------------------------------------------------------------------------------------------------------------------------------------------------------------------------------------------------------------------------------|
|  |  |  |  |  |  | 01360C_A:FLU1:RAD14:C7_02100W_A:C7_02340C_A:C7_02460C_A:C7_02930C_A:<br>ZCF29:ISY1:ENP2:C7_03990C_A:C7_04140C_A:UTP18:MIS12:CR_00460C_A:CR_006<br>70C_A:BUD22:PWP2:TRM1:CAB3:CR_01410C_A:CR_01700C_A:CR_01780W_A:CR_0<br>1950W_A:CR_02030C_A:CR_02420W_A:RPC19:DBP2:RPC31:CR_02890C_A:SRP40:C<br>R_03110W_A:CR_03230W_A:CR_03360W_A:KTI12:NCS2:YVH1:IFF3:SGD1:PRP42:C<br>R_03940W_A:CR_04110W_A:CR_04160C_A:CR_04170W_A:CR_04240C_A:CR_0430<br>0W_A:NHP2:ADE6:RPB8:CR_04920W_A:NOC2:CR_05550C_A:RNR3:MTG2:DBP8:VP<br>S75:SFL1:RPL7:FGR50:CR_06680C_A:NMD3:CR_06840W_A:CR_07030C_A:CR_0708<br>0W_A:CR_07640C_A:DBP6:IMP4:CR_08000C_A:NOP10:SSB1:RIO2:TRM9:ATS1:CR_0<br>8330W_A:TSR1:PRP8:CR_08940W_A:CR_09110C_A:CR_09140C_A:SSF1:CR_09800C<br>_A:SIK1:UTP5:CR_10410C_A:CR_10430C_A:CR_10470C_A:DRS1:POP3 |
|--|--|--|--|--|--|----------------------------------------------------------------------------------------------------------------------------------------------------------------------------------------------------------------------------------------------------------------------------------------------------------------------------------------------------------------------------------------------------------------------------------------------------------------------------------------------------------------------------------------------------------------------------------------------------------------------------------------------------------------------------------------------------------------------------------------------------------------------------------------------------------|

|     |                        |                             |                                        |          |       |                                                                                                                                                                                                                                                                                                                                                                                                                                                                                                                                                                                                                                                                                                                                                                                                                                                                                                                                                                                                                                                                                                                                                                                                                                                                                                                                                                                                                                                            |
|-----|------------------------|-----------------------------|----------------------------------------|----------|-------|------------------------------------------------------------------------------------------------------------------------------------------------------------------------------------------------------------------------------------------------------------------------------------------------------------------------------------------------------------------------------------------------------------------------------------------------------------------------------------------------------------------------------------------------------------------------------------------------------------------------------------------------------------------------------------------------------------------------------------------------------------------------------------------------------------------------------------------------------------------------------------------------------------------------------------------------------------------------------------------------------------------------------------------------------------------------------------------------------------------------------------------------------------------------------------------------------------------------------------------------------------------------------------------------------------------------------------------------------------------------------------------------------------------------------------------------------------|
| 967 | rRNA 5'-end processing | 156 out of 804 genes, 19.4% | 419 out of 6473 background genes, 6.5% | 6.91E-39 | 0.00% | HBR1:CNS1:C1_02090C_A:C1_03830C_A:C1_04040C_A:C1_04120C_A:NOP4:C1_05360C_A:C1_05650W_A:C1_06540C_A:NOP6:C1_06770W_A:C1_06800W_A:C1_07090C_A:RIA1:C1_07570C_A:C1_08630W_A:MSS116:C1_09390W_A:C1_09710C_A:C1_11000C_A:C1_11900C_A:CSI2:C1_12350W_A:C1_12440W_A:C1_12570C_A:CHR1:C1_14080W_A:MPP10:FAV3:NDT80:C2_00280C_A:C2_00410C_A:C2_01510C_A:C2_02420C_A:C2_02540W_A:PRP3:SCH9:C2_04120C_A:C2_05080C_A:MAK5:C2_05160C_A:LAS1:RTA2:C2_06850W_A:NOC4:RCL1:PRS5:C2_07920W_A:NSA1:RRP8:RRP15:CWC22:C2_10740C_A:C2_10810W_A:C3_00100W_A:BUD21:BMS1:C3_02020W_A:C3_02040C_A:C3_03330C_A:HBR3:URK1:C3_04370C_A:MAK21:SFP1:CEM1:C3_05160C_A:C3_05800W_A:C3_06150W_A:C3_06370C_A:NSA2:PRP5:C3_07480W_A:C3_07550C_A:DUR4:C4_00490W_A:RLP24:NMD5:C4_00690C_A:MDN1:RAT1:C4_01280C_A:C4_02880C_A:C4_03150W_A:C4_03720C_A:C4_03830W_A:ECM1:C4_04510W_A:C4_05260W_A:C4_05650W_A:C4_06790W_A:C4_07060W_A:C4_07100C_A:C5_00920W_A:C5_00950C_A:C5_01430C_A:FYV5:SPB4:RIB2:C5_02010C_A:C5_02070C_A:RIX7:UTP13:C5_03010W_A:RMS1:C5_03670C_A:C5_03920C_A:C5_04990W_A:C5_05340W_A:NOP5:C6_02230W_A:POP4:ALS5:SNQ2:C7_00160C_A:C7_00330C_A:DBP7:C7_01360C_A:C7_02460C_A:C7_02930C_A:ISY1:C7_04140C_A:UTP18:CR_00460C_A:PWP2:CR_01410C_A:CR_01700C_A:CR_02030C_A:CR_02420W_A:CR_02890C_A:SRP40:CR_03360W_A:NCS2:YVH1:CR_03940W_A:CR_04110W_A:NOC2:CR_05550C_A:RNR3:DBP8:VPS75:SFL1:RPL7:FGR50:DBP6:IMP4:CR_08000C_A:RIO2:AT51:CR_08330W_A:PRP8:CR_09800C_A:CR_10410C_A:DRS1:POP3 |
|-----|------------------------|-----------------------------|----------------------------------------|----------|-------|------------------------------------------------------------------------------------------------------------------------------------------------------------------------------------------------------------------------------------------------------------------------------------------------------------------------------------------------------------------------------------------------------------------------------------------------------------------------------------------------------------------------------------------------------------------------------------------------------------------------------------------------------------------------------------------------------------------------------------------------------------------------------------------------------------------------------------------------------------------------------------------------------------------------------------------------------------------------------------------------------------------------------------------------------------------------------------------------------------------------------------------------------------------------------------------------------------------------------------------------------------------------------------------------------------------------------------------------------------------------------------------------------------------------------------------------------------|

|           |                                   |                                   |                                                     |          |       |                                                                                                                                                                                                                                                                                                                                                                                                                                                                                                                                                                                                                                                                                                                                                                                                                                                                                                                                                                                                                                                                                                                                                                                                                                                                                                                                                                                                                                                            |
|-----------|-----------------------------------|-----------------------------------|-----------------------------------------------------|----------|-------|------------------------------------------------------------------------------------------------------------------------------------------------------------------------------------------------------------------------------------------------------------------------------------------------------------------------------------------------------------------------------------------------------------------------------------------------------------------------------------------------------------------------------------------------------------------------------------------------------------------------------------------------------------------------------------------------------------------------------------------------------------------------------------------------------------------------------------------------------------------------------------------------------------------------------------------------------------------------------------------------------------------------------------------------------------------------------------------------------------------------------------------------------------------------------------------------------------------------------------------------------------------------------------------------------------------------------------------------------------------------------------------------------------------------------------------------------------|
| 3447<br>1 | ncRNA<br>5'-end<br>processin<br>g | 156 out of<br>804 genes,<br>19.4% | 420 out of<br>6473<br>backgroun<br>d genes,<br>6.5% | 9.82E-39 | 0.00% | HBR1:CNS1:C1_02090C_A:C1_03830C_A:C1_04040C_A:C1_04120C_A:NOP4:C1_05360C_A:C1_05650W_A:C1_06540C_A:NOP6:C1_06770W_A:C1_06800W_A:C1_07090C_A:RIA1:C1_07570C_A:C1_08630W_A:MSS116:C1_09390W_A:C1_09710C_A:C1_11000C_A:C1_11900C_A:CSI2:C1_12350W_A:C1_12440W_A:C1_12570C_A:CHR1:C1_14080W_A:MPP10:FAV3:NDT80:C2_00280C_A:C2_00410C_A:C2_01510C_A:C2_02420C_A:C2_02540W_A:PRP3:SCH9:C2_04120C_A:C2_05080C_A:MAK5:C2_05160C_A:LAS1:RTA2:C2_06850W_A:NOC4:RCL1:PRS5:C2_07920W_A:NSA1:RRP8:RRP15:CWC22:C2_10740C_A:C2_10810W_A:C3_00100W_A:BUD21:BMS1:C3_02020W_A:C3_02040C_A:C3_03330C_A:HBR3:URK1:C3_04370C_A:MAK21:SFP1:CEM1:C3_05160C_A:C3_05800W_A:C3_06150W_A:C3_06370C_A:NSA2:PRP5:C3_07480W_A:C3_07550C_A:DUR4:C4_00490W_A:RLP24:NMD5:C4_00690C_A:MDN1:RAT1:C4_01280C_A:C4_02880C_A:C4_03150W_A:C4_03720C_A:C4_03830W_A:ECM1:C4_04510W_A:C4_05260W_A:C4_05650W_A:C4_06790W_A:C4_07060W_A:C4_07100C_A:C5_00920W_A:C5_00950C_A:C5_01430C_A:FYV5:SPB4:RIB2:C5_02010C_A:C5_02070C_A:RIX7:UTP13:C5_03010W_A:RMS1:C5_03670C_A:C5_03920C_A:C5_04990W_A:C5_05340W_A:NOP5:C6_02230W_A:POP4:ALS5:SNQ2:C7_00160C_A:C7_00330C_A:DBP7:C7_01360C_A:C7_02460C_A:C7_02930C_A:ISY1:C7_04140C_A:UTP18:CR_00460C_A:PWP2:CR_01410C_A:CR_01700C_A:CR_02030C_A:CR_02420W_A:CR_02890C_A:SRP40:CR_03360W_A:NCS2:YVH1:CR_03940W_A:CR_04110W_A:NOC2:CR_05550C_A:RNR3:DBP8:VPS75:SFL1:RPL7:FGR50:DBP6:IMP4:CR_08000C_A:RIO2:AT51:CR_08330W_A:PRP8:CR_09800C_A:CR_10410C_A:DRS1:POP3 |
|-----------|-----------------------------------|-----------------------------------|-----------------------------------------------------|----------|-------|------------------------------------------------------------------------------------------------------------------------------------------------------------------------------------------------------------------------------------------------------------------------------------------------------------------------------------------------------------------------------------------------------------------------------------------------------------------------------------------------------------------------------------------------------------------------------------------------------------------------------------------------------------------------------------------------------------------------------------------------------------------------------------------------------------------------------------------------------------------------------------------------------------------------------------------------------------------------------------------------------------------------------------------------------------------------------------------------------------------------------------------------------------------------------------------------------------------------------------------------------------------------------------------------------------------------------------------------------------------------------------------------------------------------------------------------------------|

|     |                       |                             |                                        |          |       |                                                                                                                                                                                                                                                                                                                                                                                                                                                                                                                                                                                                                                                                                                                                                                                                                                                                                                                                                                                                                                                                                                                                                                                                                                                                                                                                                                                                                                                            |
|-----|-----------------------|-----------------------------|----------------------------------------|----------|-------|------------------------------------------------------------------------------------------------------------------------------------------------------------------------------------------------------------------------------------------------------------------------------------------------------------------------------------------------------------------------------------------------------------------------------------------------------------------------------------------------------------------------------------------------------------------------------------------------------------------------------------------------------------------------------------------------------------------------------------------------------------------------------------------------------------------------------------------------------------------------------------------------------------------------------------------------------------------------------------------------------------------------------------------------------------------------------------------------------------------------------------------------------------------------------------------------------------------------------------------------------------------------------------------------------------------------------------------------------------------------------------------------------------------------------------------------------------|
| 966 | RNA 5'-end processing | 156 out of 804 genes, 19.4% | 421 out of 6473 background genes, 6.5% | 1.39E-38 | 0.00% | HBR1:CNS1:C1_02090C_A:C1_03830C_A:C1_04040C_A:C1_04120C_A:NOP4:C1_05360C_A:C1_05650W_A:C1_06540C_A:NOP6:C1_06770W_A:C1_06800W_A:C1_07090C_A:RIA1:C1_07570C_A:C1_08630W_A:MSS116:C1_09390W_A:C1_09710C_A:C1_11000C_A:C1_11900C_A:CSI2:C1_12350W_A:C1_12440W_A:C1_12570C_A:CHR1:C1_14080W_A:MPP10:FAV3:NDT80:C2_00280C_A:C2_00410C_A:C2_01510C_A:C2_02420C_A:C2_02540W_A:PRP3:SCH9:C2_04120C_A:C2_05080C_A:MAK5:C2_05160C_A:LAS1:RTA2:C2_06850W_A:NOC4:RCL1:PRS5:C2_07920W_A:NSA1:RRP8:RRP15:CWC22:C2_10740C_A:C2_10810W_A:C3_00100W_A:BUD21:BMS1:C3_02020W_A:C3_02040C_A:C3_03330C_A:HBR3:URK1:C3_04370C_A:MAK21:SFP1:CEM1:C3_05160C_A:C3_05800W_A:C3_06150W_A:C3_06370C_A:NSA2:PRP5:C3_07480W_A:C3_07550C_A:DUR4:C4_00490W_A:RLP24:NMD5:C4_00690C_A:MDN1:RAT1:C4_01280C_A:C4_02880C_A:C4_03150W_A:C4_03720C_A:C4_03830W_A:ECM1:C4_04510W_A:C4_05260W_A:C4_05650W_A:C4_06790W_A:C4_07060W_A:C4_07100C_A:C5_00920W_A:C5_00950C_A:C5_01430C_A:FYV5:SPB4:RIB2:C5_02010C_A:C5_02070C_A:RIX7:UTP13:C5_03010W_A:RMS1:C5_03670C_A:C5_03920C_A:C5_04990W_A:C5_05340W_A:NOP5:C6_02230W_A:POP4:ALS5:SNQ2:C7_00160C_A:C7_00330C_A:DBP7:C7_01360C_A:C7_02460C_A:C7_02930C_A:ISY1:C7_04140C_A:UTP18:CR_00460C_A:PWP2:CR_01410C_A:CR_01700C_A:CR_02030C_A:CR_02420W_A:CR_02890C_A:SRP40:CR_03360W_A:NCS2:YVH1:CR_03940W_A:CR_04110W_A:NOC2:CR_05550C_A:RNR3:DBP8:VPS75:SFL1:RPL7:FGR50:DBP6:IMP4:CR_08000C_A:RIO2:AT51:CR_08330W_A:PRP8:CR_09800C_A:CR_10410C_A:DRS1:POP3 |
|-----|-----------------------|-----------------------------|----------------------------------------|----------|-------|------------------------------------------------------------------------------------------------------------------------------------------------------------------------------------------------------------------------------------------------------------------------------------------------------------------------------------------------------------------------------------------------------------------------------------------------------------------------------------------------------------------------------------------------------------------------------------------------------------------------------------------------------------------------------------------------------------------------------------------------------------------------------------------------------------------------------------------------------------------------------------------------------------------------------------------------------------------------------------------------------------------------------------------------------------------------------------------------------------------------------------------------------------------------------------------------------------------------------------------------------------------------------------------------------------------------------------------------------------------------------------------------------------------------------------------------------------|

|     |                                                                                          |                             |                                        |          |       |                                                                                                                                                                                                                                                                                                                                                                                                                                                                                                                                                                                                                                                                                                                                                                                                                                                                                                                                                                                                                                                                                                                                                                                                                                                                                                                                                                                                                                                                                                                                   |
|-----|------------------------------------------------------------------------------------------|-----------------------------|----------------------------------------|----------|-------|-----------------------------------------------------------------------------------------------------------------------------------------------------------------------------------------------------------------------------------------------------------------------------------------------------------------------------------------------------------------------------------------------------------------------------------------------------------------------------------------------------------------------------------------------------------------------------------------------------------------------------------------------------------------------------------------------------------------------------------------------------------------------------------------------------------------------------------------------------------------------------------------------------------------------------------------------------------------------------------------------------------------------------------------------------------------------------------------------------------------------------------------------------------------------------------------------------------------------------------------------------------------------------------------------------------------------------------------------------------------------------------------------------------------------------------------------------------------------------------------------------------------------------------|
| 479 | endonucleolytic cleavage of tricistronic rRNA transcript (SSU-rRNA, 5.8S rRNA, LSU-rRNA) | 167 out of 804 genes, 20.8% | 473 out of 6473 background genes, 7.3% | 1.92E-38 | 0.00% | HBR1:CNS1:RRS1:C1_02090C_A:ARO80:C1_03830C_A:C1_04040C_A:C1_04120C_A:NOP4:C1_05360C_A:C1_05650W_A:C1_06540C_A:NOP6:C1_06770W_A:C1_06800W_A:C1_07090C_A:RIA1:C1_07570C_A:GCD6:C1_08630W_A:MSS116:C1_09390W_A:C1_09710C_A:DBP3:C1_11000C_A:KRR1:C1_11900C_A:CSI2:C1_12350W_A:C1_12440W_A:C1_12570C_A:CHR1:C1_14080W_A:MPP10:FAV3:NDT80:C2_00280C_A:C2_00410C_A:C2_01510C_A:C2_02420C_A:C2_02540W_A:PRP3:SCH9:C2_04120C_A:C2_05080C_A:MAK5:C2_05160C_A:LAS1:RTA2:C2_06850W_A:NOC4:RCL1:PRS5:C2_07920W_A:NSA1:RRP8:RRP15:CWC22:C2_10740C_A:C2_10810W_A:C3_00100W_A:BUD21:BMS1:C3_02020W_A:C3_02040C_A:C3_02350W_A:C3_03330C_A:HBR3:URK1:C3_04370C_A:MAK21:SFP1:CEM1:C3_05160C_A:QDR2:C3_05800W_A:DED1:C3_06150W_A:C3_06370C_A:NSA2:PRP5:C3_07480W_A:C3_07550C_A:DUR4:C4_00490W_A:RLP24:NMD5:C4_00690C_A:MDN1:RAT1:C4_01280C_A:C4_02880C_A:C4_03150W_A:C4_03720C_A:C4_03830W_A:ECM1:C4_04510W_A:C4_05260W_A:C4_05650W_A:C4_06790W_A:C4_07060W_A:C4_07100C_A:C5_00920W_A:C5_00950C_A:BUD23:C5_01430C_A:FYV5:SPB4:RIB2:C5_02010C_A:C5_02070C_A:RIX7:UTP13:C5_03010W_A:RMS1:C5_03670C_A:C5_03920C_A:C5_04990W_A:C5_05340W_A:NOP5:C6_02230W_A:POP4:ALS5:SNQ2:C7_00160C_A:C7_00330C_A:DBP7:C7_01360C_A:C7_02460C_A:C7_02930C_A:ISY1:C7_04140C_A:UTP18:CR_00460C_A:PWP2:CR_01410C_A:CR_01700C_A:CR_02030C_A:CR_02420W_A:CR_02890C_A:SRP40:CR_03360W_A:NCS2:YVH1:IFF3:CR_03940W_A:CR_04110W_A:NOC2:CR_05550C_A:RNR3:DBP8:VPS75:SFL1:FGR50:CR_06680C_A:DBP6:IMP4:CR_08000C_A:RIO2:ATS1:CR_08330W_A:TSR1:PRP8:CR_09800C_A:CR_10410C_A:DRS1:POP3 |
|-----|------------------------------------------------------------------------------------------|-----------------------------|----------------------------------------|----------|-------|-----------------------------------------------------------------------------------------------------------------------------------------------------------------------------------------------------------------------------------------------------------------------------------------------------------------------------------------------------------------------------------------------------------------------------------------------------------------------------------------------------------------------------------------------------------------------------------------------------------------------------------------------------------------------------------------------------------------------------------------------------------------------------------------------------------------------------------------------------------------------------------------------------------------------------------------------------------------------------------------------------------------------------------------------------------------------------------------------------------------------------------------------------------------------------------------------------------------------------------------------------------------------------------------------------------------------------------------------------------------------------------------------------------------------------------------------------------------------------------------------------------------------------------|

|       |             |                             |                                        |          |       |                                                                                                                                                                                                                                                                                                                                                                                                                                                                                                                                                                                                                                                                                                                                                                                                                                                                                                                                                                                                                                                                                                                                                                                                                                                                                                                                                                                                                                                                        |
|-------|-------------|-----------------------------|----------------------------------------|----------|-------|------------------------------------------------------------------------------------------------------------------------------------------------------------------------------------------------------------------------------------------------------------------------------------------------------------------------------------------------------------------------------------------------------------------------------------------------------------------------------------------------------------------------------------------------------------------------------------------------------------------------------------------------------------------------------------------------------------------------------------------------------------------------------------------------------------------------------------------------------------------------------------------------------------------------------------------------------------------------------------------------------------------------------------------------------------------------------------------------------------------------------------------------------------------------------------------------------------------------------------------------------------------------------------------------------------------------------------------------------------------------------------------------------------------------------------------------------------------------|
| 36260 | RNA capping | 157 out of 804 genes, 19.5% | 427 out of 6473 background genes, 6.6% | 2.29E-38 | 0.00% | HBR1:CNS1:C1_02090C_A:C1_03830C_A:C1_04040C_A:C1_04120C_A:NOP4:C1_05360C_A:C1_05650W_A:C1_06540C_A:NOP6:C1_06770W_A:C1_06800W_A:C1_07090C_A:RIA1:C1_07570C_A:C1_08630W_A:MSS116:C1_09390W_A:C1_09710C_A:C1_11000C_A:C1_11900C_A:CSI2:C1_12350W_A:C1_12440W_A:C1_12570C_A:CHR1:C1_14080W_A:MPP10:FAV3:NDT80:C2_00280C_A:C2_00410C_A:C2_01510C_A:C2_02420C_A:C2_02540W_A:PRP3:SCH9:C2_04120C_A:C2_05080C_A:MAK5:C2_05160C_A:LAS1:RTA2:C2_06850W_A:NOC4:C2_07360W_A:RCL1:PRS5:C2_07920W_A:NSA1:RRP8:RRP15:CWC22:C2_10740C_A:C2_10810W_A:C3_00100W_A:BUD21:BMS1:C3_02020W_A:C3_02040C_A:C3_03330C_A:HBR3:URK1:C3_04370C_A:MAK21:SFP1:CEM1:C3_05160C_A:C3_05800W_A:C3_06150W_A:C3_06370C_A:NSA2:PRP5:C3_07480W_A:C3_07550C_A:DUR4:C4_00490W_A:RLP24:NMD5:C4_00690C_A:MDN1:RAT1:C4_01280C_A:C4_02880C_A:C4_03150W_A:C4_03720C_A:C4_03830W_A:ECM1:C4_04510W_A:C4_05260W_A:C4_05650W_A:C4_06790W_A:C4_07060W_A:C4_07100C_A:C5_00920W_A:C5_00950C_A:C5_01430C_A:FYV5:SPB4:RIB2:C5_02010C_A:C5_02070C_A:RIX7:UTP13:C5_03010W_A:RMS1:C5_03670C_A:C5_03920C_A:C5_04990W_A:C5_05340W_A:NOP5:C6_02230W_A:POP4:ALS5:SNQ2:C7_00160C_A:C7_00330C_A:DBP7:C7_01360C_A:C7_02460C_A:C7_02930C_A:ISY1:C7_04140C_A:UTP18:CR_00460C_A:PWP2:CR_01410C_A:CR_01700C_A:CR_02030C_A:CR_02420W_A:CR_02890C_A:SRP40:CR_03360W_A:NCS2:YVH1:CR_03940W_A:CR_04110W_A:NOC2:CR_05550C_A:RNR3:DBP8:VPS75:SFL1:RPL7:FGR50:DBP6:IMP4:CR_08000C_A:RIO2:ATS1:CR_08330W_A:PRP8:CR_09800C_A:CR_10410C_A:DRS1:POP3 |
|-------|-------------|-----------------------------|----------------------------------------|----------|-------|------------------------------------------------------------------------------------------------------------------------------------------------------------------------------------------------------------------------------------------------------------------------------------------------------------------------------------------------------------------------------------------------------------------------------------------------------------------------------------------------------------------------------------------------------------------------------------------------------------------------------------------------------------------------------------------------------------------------------------------------------------------------------------------------------------------------------------------------------------------------------------------------------------------------------------------------------------------------------------------------------------------------------------------------------------------------------------------------------------------------------------------------------------------------------------------------------------------------------------------------------------------------------------------------------------------------------------------------------------------------------------------------------------------------------------------------------------------------|



|     |                                                                                                     |                             |                                        |          |       |                                                                                                                                                                                                                                                                                                                                                                                                                                                                                                                                                                                                                                                                                                                                                                                                                                                                                                                                                                                                                                                                                                                                                                                                                                                                                                                                                                                                                                                 |
|-----|-----------------------------------------------------------------------------------------------------|-----------------------------|----------------------------------------|----------|-------|-------------------------------------------------------------------------------------------------------------------------------------------------------------------------------------------------------------------------------------------------------------------------------------------------------------------------------------------------------------------------------------------------------------------------------------------------------------------------------------------------------------------------------------------------------------------------------------------------------------------------------------------------------------------------------------------------------------------------------------------------------------------------------------------------------------------------------------------------------------------------------------------------------------------------------------------------------------------------------------------------------------------------------------------------------------------------------------------------------------------------------------------------------------------------------------------------------------------------------------------------------------------------------------------------------------------------------------------------------------------------------------------------------------------------------------------------|
| 472 | endonucleolytic cleavage to generate mature 5'-end of SSU-rRNA from (SSU-rRNA, 5.8S rRNA, LSU-rRNA) | 154 out of 804 genes, 19.2% | 417 out of 6473 background genes, 6.4% | 8.32E-38 | 0.00% | HBR1:CNS1:C1_02090C_A:C1_03830C_A:C1_04040C_A:C1_04120C_A:NOP4:C1_05360C_A:C1_05650W_A:C1_06540C_A:NOP6:C1_06770W_A:C1_06800W_A:C1_07090C_A:RIA1:C1_07570C_A:C1_08630W_A:MSS116:C1_09390W_A:C1_09710C_A:C1_11000C_A:C1_11900C_A:C1_12350W_A:C1_12440W_A:C1_12570C_A:CHR1:C1_14080W_A:MPP10:FAV3:NDT80:C2_00280C_A:C2_00410C_A:C2_01510C_A:C2_02420C_A:C2_02540W_A:PRP3:SCH9:C2_04120C_A:C2_05080C_A:MAK5:C2_05160C_A:LAS1:RTA2:C2_06850W_A:NOC4:RCL1:PRS5:C2_07920W_A:NSA1:RRP8:RRP15:WC22:C2_10740C_A:C2_10810W_A:C3_00100W_A:BUD21:BMS1:C3_02020W_A:C3_02040C_A:C3_03330C_A:HBR3:URK1:C3_04370C_A:MAK21:SFP1:CEM1:C3_05160C_A:C3_05800W_A:C3_06150W_A:C3_06370C_A:NSA2:PRP5:C3_07480W_A:C3_07550C_A:DUR4:C4_00490W_A:RLP24:NMD5:C4_00690C_A:MDN1:RAT1:C4_01280C_A:C4_02880C_A:C4_03150W_A:C4_03720C_A:C4_03830W_A:ECM1:C4_04510W_A:C4_05260W_A:C4_05650W_A:C4_06790W_A:C4_07060W_A:C4_07100C_A:C5_00920W_A:C5_00950C_A:C5_01430C_A:FYV5:SPB4:RIB2:C5_02010C_A:C5_02070C_A:RIX7:UTP13:C5_03010W_A:RMS1:C5_03670C_A:C5_03920C_A:C5_04990W_A:C5_05340W_A:NOP5:C6_02230W_A:POP4:ALS5:SNQ2:C7_00160C_A:C7_00330C_A:DBP7:C7_01360C_A:C7_02460C_A:C7_02930C_A:ISY1:C7_04140C_A:UTP18:CR_00460C_A:PWP2:CR_01410C_A:CR_01700C_A:CR_02030C_A:CR_02420W_A:CR_02890C_A:SRP40:CR_03360W_A:NCS2:YVH1:CR_03940W_A:CR_04110W_A:NOC2:CR_05550C_A:RNR3:DBP8:VPS75:SFL1:FGR50:DBP6:IMP4:CR_08000C_A:RIO2:ATS1:CR_08330W_A:PRP8:CR_09800C_A:CR_10410C_A:DRS1:POP3 |
|-----|-----------------------------------------------------------------------------------------------------|-----------------------------|----------------------------------------|----------|-------|-------------------------------------------------------------------------------------------------------------------------------------------------------------------------------------------------------------------------------------------------------------------------------------------------------------------------------------------------------------------------------------------------------------------------------------------------------------------------------------------------------------------------------------------------------------------------------------------------------------------------------------------------------------------------------------------------------------------------------------------------------------------------------------------------------------------------------------------------------------------------------------------------------------------------------------------------------------------------------------------------------------------------------------------------------------------------------------------------------------------------------------------------------------------------------------------------------------------------------------------------------------------------------------------------------------------------------------------------------------------------------------------------------------------------------------------------|

|       |                               |                             |                                          |          |       |                                                                                                                                                                                                                                                                                                                                                                                                                                                                                                                                                                                                                                                                                                                                                                                                                                                                                                                                                                                                                                                                                                                                                                                                                                                                                                                                                                                                                                                                                                                                                                                                                                                                                                                                                                                                                                                                                                                                                                                                                                                                                                                                                                                                                                                                                                                                                                                                                                                                                                                                                                                                                                                                           |
|-------|-------------------------------|-----------------------------|------------------------------------------|----------|-------|---------------------------------------------------------------------------------------------------------------------------------------------------------------------------------------------------------------------------------------------------------------------------------------------------------------------------------------------------------------------------------------------------------------------------------------------------------------------------------------------------------------------------------------------------------------------------------------------------------------------------------------------------------------------------------------------------------------------------------------------------------------------------------------------------------------------------------------------------------------------------------------------------------------------------------------------------------------------------------------------------------------------------------------------------------------------------------------------------------------------------------------------------------------------------------------------------------------------------------------------------------------------------------------------------------------------------------------------------------------------------------------------------------------------------------------------------------------------------------------------------------------------------------------------------------------------------------------------------------------------------------------------------------------------------------------------------------------------------------------------------------------------------------------------------------------------------------------------------------------------------------------------------------------------------------------------------------------------------------------------------------------------------------------------------------------------------------------------------------------------------------------------------------------------------------------------------------------------------------------------------------------------------------------------------------------------------------------------------------------------------------------------------------------------------------------------------------------------------------------------------------------------------------------------------------------------------------------------------------------------------------------------------------------------------|
| 44085 | cellular component biogenesis | 316 out of 804 genes, 39.3% | 1340 out of 6473 background genes, 20.7% | 1.27E-35 | 0.00% | <p>PHR2:HBR1:CNS1:RRS1:C1_01160C_A:C1_01470W_A:C1_01900C_A:C1_02090C_A:ABP140:C1_02450C_A:PDE2:ATG17:TSR2:RPL6:ARO80:ARX1:C1_03790C_A:C1_03830C_A:C1_04040C_A:C1_04120C_A:ERB1:NOP4:RRP6:C1_05220C_A:C1_05230W_A:C1_05360C_A:RPS27A:FAL1:C1_05650W_A:C1_06540C_A:NOP6:C1_06760C_A:C1_06770W_A:C1_06800W_A:SUI2:C1_07090C_A:RIA1:YPD1:PEX3:C1_07510W_A:C1_07570C_A:C1_07950C_A:FUN12:GCD6:C1_08630W_A:MSS116:JIP5:C1_09390W_A:YTM1:C1_09710C_A:DBP3:TPK1:C1_10620W_A:C1_10970W_A:C1_11000C_A:KRR1:GAR1:C1_11560C_A:C1_11900C_A:C1_11910W_A:CSI2:C1_12350W_A:C1_12440W_A:C1_12570C_A:CHR1:C1_12680W_A:C1_12760W_A:C1_13370W_A:SIM1:C1_14080W_A:SAM35:MPP10:FAV3:NDT80:C2_00280C_A:C2_00410C_A:C2_00810C_A:C2_01070W_A:C2_01510C_A:C2_02420C_A:PRS1:C2_02540W_A:C2_02710C_A:PRP3:MNN42:SCH9:C2_04120C_A:C2_04570W_A:SNU114:C2_04820W_A:C2_05080C_A:MAK5:C2_05160C_A:RPF2:C2_05520W_A:TES1:LAS1:CNT:ECM17:RTA2:RPL11:C2_06850W_A:NOC4:C2_07360W_A:RCL1:PRS5:C2_07920W_A:NSA1:KRE30:RRP8:TIF4631:RPT6:C2_08840W_A:PES1:RRP15:C2_09660W_A:CWC22:OCA1:PUS7:MTR2:TIF11:C2_10740C_A:C2_10810W_A:C3_00100W_A:UTP8:BUD21:SOF1:C3_00950C_A:BMS1:C3_01560W_A:C3_02020W_A:C3_02040C_A:UTP4:C3_02350W_A:C3_03070W_A:C3_03330C_A:HBR3:URK1:C3_04370C_A:C3_04380C_A:MAK21:SFP1:CEM1:C3_05160C_A:C3_05380W_A:QDR2:C3_05800W_A:C3_05860C_A:NOG1:DED1:C3_06150W_A:C3_06370C_A:NSA2:PRP5:C3_06760W_A:NOP13:C3_07480W_A:C3_07550C_A:UTP9:DUR4:C4_00490W_A:RLP24:NMD5:C4_00690C_A:C4_00810C_A:MDN1:RAT1:C4_01280C_A:PWP1:C4_01670C_A:TOA2:ZUO1:C4_02880C_A:C4_03040W_A:C4_03150W_A:C4_03720C_A:C4_03740W_A:C4_03830W_A:RRP42:RAM1:ECM1:C4_04510W_A:SSZ1:AGP3:C4_05010W_A:MYO5:NBP35:C4_05260W_A:C4_05650W_A:C4_06210C_A:C4_06410W_A:NOP1:C4_06790W_A:MNN46:C4_07060W_A:C4_07100C_A:RMT2:C5_00920W_A:C5_00950C_A:BUD23:PUS4:C5_01430C_A:FYV5:SPB4:C5_01930W_A:RIB2:C5_02010C_A:C5_02070C_A:RIX7:GCD11:TIF5:UTP13:C5_03010W_A:RMS1:C5_03670C_A:C5_03920C_A:C5_04610W_A:HAS1:C5_04990W_A:C5_05340W_A:NOP5:C6_01040C_A:RCN1:CIC1:C6_01890C_A:C6_02230W_A:NIP7:MOB1:SAC6:MRT4:POP4:C6_03210C_A:C6_03390W_A:ALS5:SNQ2:SPB1:C7_00160C_A:C7_00330C_A:RPA135:NOP15:C7_01030C_A:DBP7:C7_01360C_A:FLU1:C7_02100W_A:C7_02460C_A:C7_02930C_A:ISY1:ENP2:C7_04140C_A:UTP18:CR_00460C_A:BUD22:BMT3:PWP2:CR_01410C_A:CR_01700C_A:CR_01780W_A:CR_02030C_A:CR_02420W_A:RPC19:DBP2:CR_02890C_A:SRP40:CR_03230W_A:CR_03360W_A:KTI12:NCS2:YVH1:IFF3:SGD1:PRP42:CR_03940W_A:MEX67:CR_04110W_A:CR_04170W_A:CR_04240C_A:NHP2:NOC2:CR_05550C_A:RNR3:MTG2:DBP8:SDA1:VPS75:SFL1:RPL7:FGR50:CR_06680C_A:NMD3:CR_06840W_A:CR_07030C_A:CR_07080W_A:CR_07640C_A:DBP6:IMP4:CR_08000C_A:NOP10:SSB1:RIO2:CR_08130W_A:ATS1:CR_08</p> |
|-------|-------------------------------|-----------------------------|------------------------------------------|----------|-------|---------------------------------------------------------------------------------------------------------------------------------------------------------------------------------------------------------------------------------------------------------------------------------------------------------------------------------------------------------------------------------------------------------------------------------------------------------------------------------------------------------------------------------------------------------------------------------------------------------------------------------------------------------------------------------------------------------------------------------------------------------------------------------------------------------------------------------------------------------------------------------------------------------------------------------------------------------------------------------------------------------------------------------------------------------------------------------------------------------------------------------------------------------------------------------------------------------------------------------------------------------------------------------------------------------------------------------------------------------------------------------------------------------------------------------------------------------------------------------------------------------------------------------------------------------------------------------------------------------------------------------------------------------------------------------------------------------------------------------------------------------------------------------------------------------------------------------------------------------------------------------------------------------------------------------------------------------------------------------------------------------------------------------------------------------------------------------------------------------------------------------------------------------------------------------------------------------------------------------------------------------------------------------------------------------------------------------------------------------------------------------------------------------------------------------------------------------------------------------------------------------------------------------------------------------------------------------------------------------------------------------------------------------------------------|

|  |  |  |  |  |  |                                                                                                                |
|--|--|--|--|--|--|----------------------------------------------------------------------------------------------------------------|
|  |  |  |  |  |  | 330W_A:TSR1:CR_08500W_A:PRP8:CR_09110C_A:ELF1:SSF1:CR_09800C_A:SIK1:UT<br>P5:CR_10410C_A:CR_10470C_A:DRS1:POP3 |
|--|--|--|--|--|--|----------------------------------------------------------------------------------------------------------------|

|       |                                  |                            |                                        |          |       |                                                                                                                                                                                                                                                                                                                                                                                                                                                                                                                                                                                                                                                                                                                                                                                                                              |
|-------|----------------------------------|----------------------------|----------------------------------------|----------|-------|------------------------------------------------------------------------------------------------------------------------------------------------------------------------------------------------------------------------------------------------------------------------------------------------------------------------------------------------------------------------------------------------------------------------------------------------------------------------------------------------------------------------------------------------------------------------------------------------------------------------------------------------------------------------------------------------------------------------------------------------------------------------------------------------------------------------------|
| 71826 | protein-RNA complex organization | 95 out of 804 genes, 11.8% | 198 out of 6473 background genes, 3.1% | 8.06E-33 | 0.00% | RPL6:C1_04040C_A:C1_04120C_A:ERB1:NOP4:RRP6:C1_05360C_A:RPS27A:C1_06760C_A:SUI2:FUN12:JIP5:YTM1:C1_09710C_A:C1_10970W_A:CSI2:C1_12440W_A:C1_12760W_A:C1_14080W_A:C2_00280C_A:C2_01070W_A:C2_02540W_A:C2_02710C_A:PRP3:SNU114:MAK5:C2_05160C_A:RPF2:RPL11:TIF11:C2_10740C_A:C3_00100W_A:BMS1:C3_01560W_A:C3_02020W_A:C3_02040C_A:C3_02350W_A:C3_03330C_A:C3_04370C_A:MAK21:C3_05160C_A:QDR2:NOG1:DED1:C3_06370C_A:PRP5:C3_07480W_A:RLP24:MDN1:C4_03150W_A:C4_05010W_A:C4_06410W_A:C4_07100C_A:RMT2:SPB4:C5_01930W_A:C5_02010C_A:C5_02070C_A:GCD11:TIF5:HAS1:C5_05340W_A:CIC1:C6_02230W_A:NIP7:SPB1:RPA135:DBP7:FLU1:ISY1:ENP2:UTP18:BU22:PWP2:CR_01410C_A:CR_01700C_A:DBP2:YVH1:SGD1:CR_03940W_A:CR_04110W_A:CR_04170W_A:NOC2:CR_05550C_A:SDA1:CR_06680C_A:CR_07080W_A:HS104:TSR1:PRP8:ELF1:SSF1:CR_09800C_A:CR_10470C_A:DRS1 |
|-------|----------------------------------|----------------------------|----------------------------------------|----------|-------|------------------------------------------------------------------------------------------------------------------------------------------------------------------------------------------------------------------------------------------------------------------------------------------------------------------------------------------------------------------------------------------------------------------------------------------------------------------------------------------------------------------------------------------------------------------------------------------------------------------------------------------------------------------------------------------------------------------------------------------------------------------------------------------------------------------------------|

|       |                 |                             |                                          |          |       |                                                                                                                                                                                                                                                                                                                                                                                                                                                                                                                                                                                                                                                                                                                                                                                                                                                                                                                                                                                                                                                                                                                                                                                                                                                                                                                                                                                                                                                                                                                                                                                                                                                                                                                                                                                                                                                                                                                                                                                                                                                                                                                                                                                                                                                                                                                                                                                                                                                                                                                                                                                                                                                                           |
|-------|-----------------|-----------------------------|------------------------------------------|----------|-------|---------------------------------------------------------------------------------------------------------------------------------------------------------------------------------------------------------------------------------------------------------------------------------------------------------------------------------------------------------------------------------------------------------------------------------------------------------------------------------------------------------------------------------------------------------------------------------------------------------------------------------------------------------------------------------------------------------------------------------------------------------------------------------------------------------------------------------------------------------------------------------------------------------------------------------------------------------------------------------------------------------------------------------------------------------------------------------------------------------------------------------------------------------------------------------------------------------------------------------------------------------------------------------------------------------------------------------------------------------------------------------------------------------------------------------------------------------------------------------------------------------------------------------------------------------------------------------------------------------------------------------------------------------------------------------------------------------------------------------------------------------------------------------------------------------------------------------------------------------------------------------------------------------------------------------------------------------------------------------------------------------------------------------------------------------------------------------------------------------------------------------------------------------------------------------------------------------------------------------------------------------------------------------------------------------------------------------------------------------------------------------------------------------------------------------------------------------------------------------------------------------------------------------------------------------------------------------------------------------------------------------------------------------------------------|
| 10467 | gene expression | 400 out of 804 genes, 49.8% | 1951 out of 6473 background genes, 30.1% | 9.56E-33 | 0.00% | RIM8:HBR1:CNS1:RRS1:HMT1:C1_01150C_A:C1_01160C_A:C1_01470W_A:C1_01530C_A:C1_01900C_A:C1_02090C_A:ABP140:C1_02310C_A:C1_02430C_A:C1_02450C_A:HOM6:PDE2:MIA40:TSR2:RPL6:ARO80:MAS1:C1_03370W_A:C1_03790C_A:C1_03830C_A:C1_04040C_A:C1_04120C_A:ERB1:NOP4:C1_04990C_A:RRP6:C1_05220C_A:C1_05230W_A:C1_05360C_A:RPS27A:C1_05630C_A:FAL1:C1_05650W_A:C1_06540C_A:NOP6:C1_06760C_A:C1_06770W_A:MRPL19:C1_06800W_A:SUI2:C1_07090C_A:RIA1:YPD1:PEX3:LHP1:C1_07510W_A:C1_07570C_A:C1_07950C_A:FUN12:DRG1:GCD6:C1_08630W_A:MSS116:C1_09390W_A:C1_09710C_A:DBP3:TPK1:C1_10620W_A:C1_10970W_A:C1_11000C_A:KRR1:C1_11560C_A:C1_11900C_A:C1_11910W_A:CSI2:C1_12350W_A:C1_12440W_A:C1_12570C_A:CHR1:C1_12670C_A:C1_12760W_A:C1_13260W_A:HSP70:C1_14080W_A:MPP10:FAV3:NDT80:HMA1:C2_00220C_A:C2_00280C_A:C2_00410C_A:C2_00880W_A:C2_01070W_A:C2_01510C_A:C2_01870C_A:C2_02420C_A:PRS1:C2_02540W_A:C2_02710C_A:PRP3:SCH9:GCD7:C2_04120C_A:C2_04570W_A:SNU114:C2_04820W_A:CRK1:C2_05080C_A:MAK5:ERF1:C2_05160C_A:RPF2:RPC40:C2_05520W_A:KTI11:TES1:LAS1:CNT:ECM17:RTA2:C2_06480W_A:RPL11:C2_06850W_A:SPE3:RPA12:NOC4:C2_07360W_A:SSC1:RCL1:C2_07610C_A:PRS5:C2_07920W_A:NSA1:RRP8:TIF4631:C2_08840W_A:SLP2:PES1:RRP15:C2_09500W_A:C2_09660W_A:FCY21:CWC22:OCA1:PUS7:MTR2:TIF11:C2_10740C_A:RPC11:C2_10810W_A:C3_00100W_A:UTP8:BUD21:SOF1:C3_00950C_A:BMS1:C3_01520C_A:C3_01560W_A:C3_02020W_A:C3_02030W_A:C3_02040C_A:UTP4:C3_02180C_A:C3_02350W_A:C3_03070W_A:C3_03330C_A:HBR3:SAP9:URK1:C3_04370C_A:C3_04380C_A:MAK21:RPP2B:SFP1:CEM1:C3_05140C_A:C3_05160C_A:SAP3:C3_05380W_A:QDR2:C3_05800W_A:C3_05860C_A:CTA4:NOG1:ELP3:DED1:C3_06150W_A:C3_06370C_A:NSA2:PRP5:C3_06760W_A:C3_06830C_A:NOP13:C3_07400W_A:C3_07480W_A:C3_07550C_A:RIT1:UTP9:DUR4:C4_00490W_A:RLP24:NMD5:C4_00690C_A:C4_00810C_A:C4_00940W_A:MDN1:DAG7:RAT1:C4_01280C_A:PWP1:NIPI:C4_01670C_A:TOA2:HGH1:C4_02850W_A:ZUO1:C4_02880C_A:C4_03040W_A:C4_03150W_A:C4_03720C_A:C4_03730C_A:C4_03740W_A:C4_03830W_A:RRP42:RAM1:C4_04090C_A:ECM1:C4_04510W_A:SSZ1:C4_04720W_A:C4_04810C_A:AGP3:NBP35:C4_05260W_A:C4_05650W_A:C4_06210C_A:C4_06410W_A:NOP1:C4_06790W_A:C4_07060W_A:C4_07100C_A:C4_07140W_A:C5_00280C_A:DUS4:RMT2:C5_00920W_A:C5_00950C_A:BUD23:PUS4:C5_01430C_A:FYV5:SPB4:C5_01610W_A:MAS2:GIS2:C5_01930W_A:RIB2:C5_02010C_A:C5_02070C_A:RIX7:GCD11:TIF5:UTP13:C5_02730C_A:C5_03010W_A:RMS1:RPO26:FUR1:C5_03530C_A:C5_03550W_A:C5_03670C_A:FGR27:C5_03920C_A:CSU57:C5_04610W_A:HAS1:C5_04990W_A:C5_05340W_A:NOP5:FET31:C6_00530C_A:C6_00640C_A:C6_01040C_A:RCN1:CIC1:C6_01890C_A:C6_01980C_A:C6_02230W_A:C6_02350C_A:NIP7:MRT4:POP4:EMF1:C6_03210C_A:C6_03390W_A:FGR17:ALS5:SBA1:SHM2:SNQ2:SPB1:C6_04530C_A:C7_00 |
|-------|-----------------|-----------------------------|------------------------------------------|----------|-------|---------------------------------------------------------------------------------------------------------------------------------------------------------------------------------------------------------------------------------------------------------------------------------------------------------------------------------------------------------------------------------------------------------------------------------------------------------------------------------------------------------------------------------------------------------------------------------------------------------------------------------------------------------------------------------------------------------------------------------------------------------------------------------------------------------------------------------------------------------------------------------------------------------------------------------------------------------------------------------------------------------------------------------------------------------------------------------------------------------------------------------------------------------------------------------------------------------------------------------------------------------------------------------------------------------------------------------------------------------------------------------------------------------------------------------------------------------------------------------------------------------------------------------------------------------------------------------------------------------------------------------------------------------------------------------------------------------------------------------------------------------------------------------------------------------------------------------------------------------------------------------------------------------------------------------------------------------------------------------------------------------------------------------------------------------------------------------------------------------------------------------------------------------------------------------------------------------------------------------------------------------------------------------------------------------------------------------------------------------------------------------------------------------------------------------------------------------------------------------------------------------------------------------------------------------------------------------------------------------------------------------------------------------------------------|

|  |  |  |  |  |  |                                                                                                                                                                                                                                                                                                                                                                                                                                                                                                                                                                                                                                                                                                                                                                                                                                                                                                              |
|--|--|--|--|--|--|--------------------------------------------------------------------------------------------------------------------------------------------------------------------------------------------------------------------------------------------------------------------------------------------------------------------------------------------------------------------------------------------------------------------------------------------------------------------------------------------------------------------------------------------------------------------------------------------------------------------------------------------------------------------------------------------------------------------------------------------------------------------------------------------------------------------------------------------------------------------------------------------------------------|
|  |  |  |  |  |  | 160C_A:C7_00330C_A:C7_00380W_A:C7_00490C_A:RPA135:NOP15:C7_01030C_A:DBP7:GCN3:C7_01360C_A:FLU1:C7_02100W_A:C7_02340C_A:C7_02460C_A:C7_02930C_A:ZCF29:CPY1:ISY1:ENP2:C7_03990C_A:C7_04140C_A:UTP18:CR_00460C_A:CR_00670C_A:BUD22:PWP2:TRM1:CR_01410C_A:CR_01700C_A:CR_01780W_A:CR_01950W_A:CR_02030C_A:CR_02420W_A:CR_02430C_A:RPC19:DBP2:RPC31:CR_02890C_A:SRP40:CR_03110W_A:CR_03230W_A:CR_03360W_A:KTI12:NCS2:YVH1:IFF3:PRP42:CR_03940W_A:GCD1:MEX67:CR_04110W_A:CR_04160C_A:CR_04170W_A:CR_04240C_A:CR_04300W_A:NHP2:RPB8:CR_04920W_A:NOC2:CR_05550C_A:RNR3:MTG2:DBP8:VPS75:SFL1:RPL7:FGR50:CR_06680C_A:NMD3:CR_06840W_A:CR_06980W_A:CR_07030C_A:CR_07080W_A:CR_07470W_A:CR_07640C_A:DBP6:IMP4:CR_08000C_A:NOP10:SSB1:RIO2:CR_08130W_A:TRM9:HSP104:ATS1:CR_08330W_A:GSH2:TSR1:PRP8:CR_08940W_A:CR_09110C_A:ELF1:SSF1:CR_09800C_A:SIK1:UTP5:AHA1:CR_10400W_A:CR_10410C_A:CR_10430C_A:CR_10470C_A:DRS1:POP3 |
|--|--|--|--|--|--|--------------------------------------------------------------------------------------------------------------------------------------------------------------------------------------------------------------------------------------------------------------------------------------------------------------------------------------------------------------------------------------------------------------------------------------------------------------------------------------------------------------------------------------------------------------------------------------------------------------------------------------------------------------------------------------------------------------------------------------------------------------------------------------------------------------------------------------------------------------------------------------------------------------|

|       |                                           |                             |                                          |          |       |                                                                                                                                                                                                                                                                                                                                                                                                                                                                                                                                                                                                                                                                                                                                                                                                                                                                                                                                                                                                                                                                                                                                                                                                                                                                                                                                                                                                                                                                                                                                                                                                                                                                                                                                                                                                                                                                                                                                                                                                                                                                                                                                                                                                                                                                                                                                                                                                                                                                                                                                                                                                                                                                         |
|-------|-------------------------------------------|-----------------------------|------------------------------------------|----------|-------|-------------------------------------------------------------------------------------------------------------------------------------------------------------------------------------------------------------------------------------------------------------------------------------------------------------------------------------------------------------------------------------------------------------------------------------------------------------------------------------------------------------------------------------------------------------------------------------------------------------------------------------------------------------------------------------------------------------------------------------------------------------------------------------------------------------------------------------------------------------------------------------------------------------------------------------------------------------------------------------------------------------------------------------------------------------------------------------------------------------------------------------------------------------------------------------------------------------------------------------------------------------------------------------------------------------------------------------------------------------------------------------------------------------------------------------------------------------------------------------------------------------------------------------------------------------------------------------------------------------------------------------------------------------------------------------------------------------------------------------------------------------------------------------------------------------------------------------------------------------------------------------------------------------------------------------------------------------------------------------------------------------------------------------------------------------------------------------------------------------------------------------------------------------------------------------------------------------------------------------------------------------------------------------------------------------------------------------------------------------------------------------------------------------------------------------------------------------------------------------------------------------------------------------------------------------------------------------------------------------------------------------------------------------------------|
| 2E+06 | organic cyclic compound metabolic process | 393 out of 804 genes, 48.9% | 1903 out of 6473 background genes, 29.4% | 1.19E-32 | 0.00% | RIM8:HBR1:CNS1:RRS1:HMT1:C1_01150C_A:C1_01160C_A:C1_01470W_A:C1_01530C_A:C1_01900C_A:C1_02090C_A:ABP140:C1_02310C_A:C1_02440C_A:C1_02450C_A:PDE2:TSR2:ARO80:C1_03370W_A:C1_03830C_A:C1_04040C_A:C1_04120C_A:ERB1:NOP4:C1_04990C_A:RRP6:C1_05220C_A:C1_05230W_A:C1_05360C_A:RPS27A:RIB4:FAL1:C1_05650W_A:NPL4:C1_06120C_A:C1_06540C_A:NOP6:C1_06760C_A:C1_06770W_A:C1_06800W_A:C1_07090C_A:RIA1:YMC1:YPD1:PEX3:LHP1:C1_07510W_A:C1_07570C_A:ADE4:ADE5,7:C1_07950C_A:FUN12:GCD6:C1_08630W_A:MSS116:C1_09390W_A:GUA1:C1_09610W_A:C1_09710C_A:DBP3:TPK1:C1_10620W_A:HNT1:C1_10970W_A:C1_11000C_A:C1_11370C_A:KRR1:GAR1:C1_11560C_A:C1_11900C_A:C1_11910W_A:CSI2:C1_12350W_A:C1_12440W_A:C1_12570C_A:CHR1:C1_12670C_A:C1_12760W_A:C1_13270W_A:C1_14080W_A:MPP10:FAV3:NDT80:HM A1:C2_00220C_A:C2_00280C_A:C2_00410C_A:C2_01070W_A:C2_01510C_A:C2_01870C_A:C2_02420C_A:PRS1:C2_02540W_A:C2_02710C_A:HPT1:LIG4:ADE8:PRP3:C2_03360W_A:C2_03550C_A:SCH9:C2_04120C_A:C2_04570W_A:SNU114:C2_04820W_A:CRK1:C2_05080C_A:MAK5:ERF1:C2_05160C_A:RPF2:RPC40:C2_05520W_A:KT I11:TES1:LAS1:CNT:ECM17:IMH3:RTA2:C2_06480W_A:C2_06850W_A:RPA12:NOC4:C2_07360W_A:RCL1:RNR22:PRS5:C2_07920W_A:NSA1:ORF298:C2_08460C_A:RRP8:TIF4631:RPT6:SPO11:C2_08840W_A:PES1:RRP15:C2_09500W_A:C2_09660W_A:FC Y21:CWC22:OCA1:PUS7:C2_10740C_A:RPC11:C2_10810W_A:C3_00100W_A:UTP8:BUD21:SOF1:C3_00950C_A:BMS1:URA3:C3_01560W_A:C3_02020W_A:C3_02040C_A:UTP4:C3_02350W_A:PHA2:C3_03070W_A:C3_03330C_A:HBR3:URK1:C3_04370C_A:C3_04380C_A:ADE2:MAK21:SFP1:CEM1:C3_05140C_A:C3_05160C_A:WOR2:SA P3:C3_05380W_A:QDR2:C3_05800W_A:C3_05860C_A:CTA4:NOG1:ELP3:DED1:C3_06150W_A:HNT2:C3_06370C_A:NSA2:PRP5:C3_06760W_A:C3_06940W_A:NOP13:C3_07400W_A:C3_07480W_A:C3_07550C_A:RIT1:C3_07670W_A:UTP9:DUR4:C4_00490W_A:RLP24:NMD5:C4_00690C_A:C4_00700C_A:C4_00810C_A:C4_00940W_A:MDN1:RAT1:C4_01280C_A:PWP1:C4_01670C_A:TOA2:C4_02850W_A:ZUO1:C4_02880C_A:C4_03040W_A:C4_03150W_A:C4_03720C_A:C4_03730C_A:C4_03740W_A:C4_03830W_A:RRP42:RAM1:ECM1:C4_04270W_A:C4_04510W_A:SSZ1:C4_04720W_A:C4_04810C_A:AGP3:NBP35:C4_05260W_A:C4_05650W_A:C4_06210C_A:C4_06410W_A:NOP1:C4_06790W_A:C4_07060W_A:C4_07100C_A:C5_00260W_A:C5_00280C_A:DUS4:RMT2:URA4:C5_00920W_A:C5_00950C_A:BUD23:PUS4:C5_01430C_A:FYV5:SPB4:C5_01610W_A:C5_01930W_A:RIB2:C5_02010C_A:C5_02070C_A:RI X7:TIF5:UTP13:C5_02730C_A:C5_03010W_A:RMS1:RPO26:FUR1:C5_03670C_A:FGR 27:HAM1:C5_03920C_A:URA7:C5_04610W_A:HAS1:C5_04990W_A:C5_05340W_A:NOP5:C6_00530C_A:C6_00640C_A:C6_01040C_A:RCN1:CIC1:EBP1:ACF2:C6_01890C_A:C6_02230W_A:C6_02350C_A:NIP7:C6_02410W_A:C6_02560W_A:MRT4:POP4:C6_03210C_A:BMT4:C6_03390W_A:FGR17:PAD1:ALS5:SBA1:SHM2:SNQ2:SPB1:C6_ |
|-------|-------------------------------------------|-----------------------------|------------------------------------------|----------|-------|-------------------------------------------------------------------------------------------------------------------------------------------------------------------------------------------------------------------------------------------------------------------------------------------------------------------------------------------------------------------------------------------------------------------------------------------------------------------------------------------------------------------------------------------------------------------------------------------------------------------------------------------------------------------------------------------------------------------------------------------------------------------------------------------------------------------------------------------------------------------------------------------------------------------------------------------------------------------------------------------------------------------------------------------------------------------------------------------------------------------------------------------------------------------------------------------------------------------------------------------------------------------------------------------------------------------------------------------------------------------------------------------------------------------------------------------------------------------------------------------------------------------------------------------------------------------------------------------------------------------------------------------------------------------------------------------------------------------------------------------------------------------------------------------------------------------------------------------------------------------------------------------------------------------------------------------------------------------------------------------------------------------------------------------------------------------------------------------------------------------------------------------------------------------------------------------------------------------------------------------------------------------------------------------------------------------------------------------------------------------------------------------------------------------------------------------------------------------------------------------------------------------------------------------------------------------------------------------------------------------------------------------------------------------------|

|  |  |  |  |  |  |                                                                                                                                                                                                                                                                                                                                                                                                                                                                                                                                                                                                                                                                                                                                                                                                                                    |
|--|--|--|--|--|--|------------------------------------------------------------------------------------------------------------------------------------------------------------------------------------------------------------------------------------------------------------------------------------------------------------------------------------------------------------------------------------------------------------------------------------------------------------------------------------------------------------------------------------------------------------------------------------------------------------------------------------------------------------------------------------------------------------------------------------------------------------------------------------------------------------------------------------|
|  |  |  |  |  |  | 04530C_A:C7_00160C_A:C7_00330C_A:RPA135:NOP15:C7_01030C_A:DBP7:C7_01360C_A:FLU1:RAD14:C7_02100W_A:C7_02340C_A:C7_02460C_A:C7_02930C_A:ZCF29:ISY1:ENP2:C7_03990C_A:C7_04140C_A:UTP18:MIS12:CR_00460C_A:CR_00670C_A:BUD22:PWP2:TRM1:CAB3:CR_01410C_A:CR_01700C_A:CR_01780W_A:CR_01950W_A:CR_02030C_A:CR_02420W_A:RPC19:DBP2:RPC31:CR_02890C_A:SRP40:CR_03110W_A:CR_03230W_A:CR_03360W_A:KTI12:NCS2:YVH1:IFF3:SGD1:PRP42:CR_03940W_A:CR_04110W_A:CR_04160C_A:CR_04170W_A:CR_04240C_A:CR_04300W_A:NHP2:ADE6:RPB8:CR_04920W_A:NOC2:CR_05550C_A:RNR3:MTG2:DBP8:VPS75:SFL1:RPL7:FGR50:CR_06680C_A:NMD3:CR_06840W_A:CR_07030C_A:CR_07080W_A:CR_07640C_A:DBP6:IMP4:CR_08000C_A:NOP10:SSB1:RIO2:TRM9:ATS1:CR_08330W_A:TSR1:PRP8:CR_08940W_A:CR_09110C_A:CR_09140C_A:SSF1:CR_09800C_A:SIK1:UTP5:CR_10410C_A:CR_10430C_A:CR_10470C_A:DRS1:POP3 |
|--|--|--|--|--|--|------------------------------------------------------------------------------------------------------------------------------------------------------------------------------------------------------------------------------------------------------------------------------------------------------------------------------------------------------------------------------------------------------------------------------------------------------------------------------------------------------------------------------------------------------------------------------------------------------------------------------------------------------------------------------------------------------------------------------------------------------------------------------------------------------------------------------------|



|       |                              |                            |                                        |          |       |                                                                                                                                                                                                                                                                                                                                                                                                                                                                                                                                                                                                                                                                                                                                                                                                               |
|-------|------------------------------|----------------------------|----------------------------------------|----------|-------|---------------------------------------------------------------------------------------------------------------------------------------------------------------------------------------------------------------------------------------------------------------------------------------------------------------------------------------------------------------------------------------------------------------------------------------------------------------------------------------------------------------------------------------------------------------------------------------------------------------------------------------------------------------------------------------------------------------------------------------------------------------------------------------------------------------|
| 22618 | protein-RNA complex assembly | 92 out of 804 genes, 11.4% | 193 out of 6473 background genes, 3.0% | 2.13E-31 | 0.00% | RPL6:C1_04040C_A:C1_04120C_A:ERB1:NOP4:RRP6:C1_05360C_A:RPS27A:C1_06760C_A:SUI2:FUN12:JIP5:C1_09710C_A:C1_10970W_A:CSI2:C1_12440W_A:C1_12760W_A:C1_14080W_A:C2_00280C_A:C2_01070W_A:C2_02540W_A:C2_02710C_A:PRP3:SNU114:MAK5:C2_05160C_A:RPF2:RPL11:TIF11:C2_10740C_A:C3_00100W_A:BMS1:C3_01560W_A:C3_02020W_A:C3_02040C_A:C3_02350W_A:C3_03330C_A:C3_04370C_A:MAK21:C3_05160C_A:QDR2:NOG1:C3_06370C_A:PRP5:C3_07480W_A:RLP24:MDN1:C4_03150W_A:C4_05010W_A:C4_06410W_A:C4_07100C_A:RMT2:SPB4:C5_01930W_A:C5_02010C_A:C5_02070C_A:GCD11:TIF5:HAS1:C5_05340W_A:CIC1:C6_02230W_A:NIP7:SPB1:RPA135:DBP7:FLU1:ISY1:ENP2:UTP18:BUD22:PWP2:CR_01410C_A:CR_01700C_A:DBP2:YVH1:SGD1:CR_03940W_A:CR_04110W_A:CR_04170W_A:NOC2:CR_05550C_A:SDA1:CR_06680C_A:CR_07080W_A:TSR1:PRP8:ELF1:SSF1:CR_09800C_A:CR_10470C_A:DRS1 |
|-------|------------------------------|----------------------------|----------------------------------------|----------|-------|---------------------------------------------------------------------------------------------------------------------------------------------------------------------------------------------------------------------------------------------------------------------------------------------------------------------------------------------------------------------------------------------------------------------------------------------------------------------------------------------------------------------------------------------------------------------------------------------------------------------------------------------------------------------------------------------------------------------------------------------------------------------------------------------------------------|

|       |                   |                           |                                        |          |       |                                                                                                                                                                                                                                                                                                                                                                                                                                                                                                                                                                                                                         |
|-------|-------------------|---------------------------|----------------------------------------|----------|-------|-------------------------------------------------------------------------------------------------------------------------------------------------------------------------------------------------------------------------------------------------------------------------------------------------------------------------------------------------------------------------------------------------------------------------------------------------------------------------------------------------------------------------------------------------------------------------------------------------------------------------|
| 42255 | ribosome assembly | 72 out of 804 genes, 9.0% | 125 out of 6473 background genes, 1.9% | 5.74E-31 | 0.00% | RRS1:RPL6:C1_04040C_A:ERB1:NOP4:RRP6:C1_05360C_A:RPS27A:C1_06760C_A:RIA1:FUN12:JIP5:C1_09710C_A:C1_10970W_A:CSI2:C1_12440W_A:C1_12760W_A:C1_14080W_A:C2_01070W_A:C2_02540W_A:C2_02710C_A:MAK5:C2_05160C_A:RPF2:RPL11:C2_10740C_A:BMS1:C3_01560W_A:C3_02020W_A:C3_02040C_A:C3_02350W_A:C3_04370C_A:MAK21:C3_05160C_A:QDR2:C3_06370C_A:MDN1:C4_02880C_A:C4_05010W_A:RMT2:SPB4:C5_02070C_A:TIF5:HAS1:C5_05340W_A:CIC1:C6_02230W_A:NIP7:SPB1:RPA135:DBP7:FLU1:ENP2:UTP18:BUD22:PWP2:CR_01410C_A:YVH1:SGD1:CR_03940W_A:CR_04170W_A:NOC2:CR_05550C_A:SDA1:CR_06680C_A:CR_07080W_A:TSR1:ELF1:SSF1:CR_09800C_A:CR_10470C_A:DRS1 |
|-------|-------------------|---------------------------|----------------------------------------|----------|-------|-------------------------------------------------------------------------------------------------------------------------------------------------------------------------------------------------------------------------------------------------------------------------------------------------------------------------------------------------------------------------------------------------------------------------------------------------------------------------------------------------------------------------------------------------------------------------------------------------------------------------|

|      |                         |                                 |                                                    |          |       |                                                                                                                                                                                                                                                                                                                                                                                                                                                                                                                                                                                                                                          |
|------|-------------------------|---------------------------------|----------------------------------------------------|----------|-------|------------------------------------------------------------------------------------------------------------------------------------------------------------------------------------------------------------------------------------------------------------------------------------------------------------------------------------------------------------------------------------------------------------------------------------------------------------------------------------------------------------------------------------------------------------------------------------------------------------------------------------------|
| 9451 | RNA<br>modificat<br>ion | 61 out of<br>804 genes,<br>7.6% | 97 out of<br>6473<br>backgroun<br>d genes,<br>1.5% | 6.33E-29 | 0.00% | C1_01150C_A:ABP140:C1_05360C_A:C1_07570C_A:C1_09390W_A:C1_10620W_A:<br>GAR1:C1_12570C_A:HMA1:C2_01510C_A:C2_02420C_A:C2_04820W_A:KTI11:C2_0<br>6480W_A:C2_07360W_A:RRP8:C2_08840W_A:C2_09500W_A:PUS7:C3_05140C_A:<br>C3_05860C_A:ELP3:C3_07400W_A:RIT1:C4_00810C_A:C4_00940W_A:C4_02850W<br>_A:C4_03730C_A:C4_03830W_A:C4_04810C_A:NBP35:C4_05260W_A:NOP1:DUS4:<br>BUD23:PUS4:C5_01610W_A:RIB2:C5_02730C_A:C6_02350C_A:SPB1:C6_04530C_A:<br>C7_00330C_A:C7_02340C_A:C7_03990C_A:CR_00670C_A:TRM1:CR_01780W_A:CR<br>_02030C_A:KTI12:NCS2:CR_04110W_A:CR_04160C_A:CR_04170W_A:CR_04240C_<br>A:CR_04300W_A:NHP2:NOP10:TRM9:ATS1:CR_08940W_A |
|------|-------------------------|---------------------------------|----------------------------------------------------|----------|-------|------------------------------------------------------------------------------------------------------------------------------------------------------------------------------------------------------------------------------------------------------------------------------------------------------------------------------------------------------------------------------------------------------------------------------------------------------------------------------------------------------------------------------------------------------------------------------------------------------------------------------------------|

|     |                                                                                                    |                             |                                        |          |       |                                                                                                                                                                                                                                                                                                                                                                                                                                                                                                                                                                                                                                                                                                                                                                                                                                                                                                                                                                                                                                                                                                                                                                                                                                                         |
|-----|----------------------------------------------------------------------------------------------------|-----------------------------|----------------------------------------|----------|-------|---------------------------------------------------------------------------------------------------------------------------------------------------------------------------------------------------------------------------------------------------------------------------------------------------------------------------------------------------------------------------------------------------------------------------------------------------------------------------------------------------------------------------------------------------------------------------------------------------------------------------------------------------------------------------------------------------------------------------------------------------------------------------------------------------------------------------------------------------------------------------------------------------------------------------------------------------------------------------------------------------------------------------------------------------------------------------------------------------------------------------------------------------------------------------------------------------------------------------------------------------------|
| 480 | endonucleolytic cleavage in 5'-ETS of tricistronic rRNA transcript (SSU-rRNA, 5.8S rRNA, LSU-rRNA) | 132 out of 804 genes, 16.4% | 390 out of 6473 background genes, 6.0% | 3.34E-27 | 0.00% | HBR1:CNS1:C1_02090C_A:ARO80:C1_03830C_A:C1_04040C_A:C1_04120C_A:NOP4:C1_05360C_A:C1_05650W_A:C1_06540C_A:NOP6:C1_06770W_A:C1_06800W_A:C1_07090C_A:RIA1:C1_07570C_A:GCD6:C1_08630W_A:C1_09390W_A:C1_09710C_A:C1_11000C_A:C1_12350W_A:C1_12440W_A:C1_12570C_A:CHR1:C1_14080W_A:MPP10:FAV3:NDT80:C2_00280C_A:C2_00410C_A:C2_01510C_A:C2_02420C_A:C2_02540W_A:PRP3:SCH9:C2_04120C_A:C2_05160C_A:LAS1:RTA2:C2_06850W_A:NOC4:RCL1:PRS5:C2_07920W_A:NSA1:RRP8:RRP15:CWC22:C2_10740C_A:C2_10810W_A:C3_00100W_A:BUD21:BMS1:C3_02020W_A:C3_02040C_A:C3_03330C_A:URK1:C3_04370C_A:SFP1:QDR2:C3_05800W_A:DED1:C3_06150W_A:C3_06370C_A:PRP5:C3_07480W_A:C3_07550C_A:DUR4:C4_00490W_A:NMD5:C4_00690C_A:MDN1:RAT1:C4_01280C_A:C4_02880C_A:C4_03150W_A:C4_03830W_A:C4_04510W_A:C4_05260W_A:C4_05650W_A:C4_06790W_A:C4_07060W_A:C4_07100C_A:C5_00950C_A:C5_01430C_A:SPB4:RIB2:C5_02010C_A:C5_02070C_A:RIX7:UTP13:C5_03010W_A:RMS1:C5_03670C_A:C5_03920C_A:C5_04990W_A:C5_05340W_A:NOP5:C6_02230W_A:POP4:ALS5:SNQ2:C7_01360C_A:C7_02460C_A:C7_02930C_A:C7_04140C_A:UTP18:PWP2:CR_01700C_A:CR_02030C_A:CR_02420W_A:CR_02890C_A:CR_03360W_A:NCS2:YVH1:IFF3:CR_03940W_A:CR_05550C_A:DBP8:VPS75:SFL1:CR_06680C_A:DBP6:IMP4:CR_08000C_A:RIO2:ATS1:CR_08330W_A:PRP8:CR_09800C_A |
|-----|----------------------------------------------------------------------------------------------------|-----------------------------|----------------------------------------|----------|-------|---------------------------------------------------------------------------------------------------------------------------------------------------------------------------------------------------------------------------------------------------------------------------------------------------------------------------------------------------------------------------------------------------------------------------------------------------------------------------------------------------------------------------------------------------------------------------------------------------------------------------------------------------------------------------------------------------------------------------------------------------------------------------------------------------------------------------------------------------------------------------------------------------------------------------------------------------------------------------------------------------------------------------------------------------------------------------------------------------------------------------------------------------------------------------------------------------------------------------------------------------------|

|    |                                  |                           |                                        |          |       |                                                                                                                                                                                                                                                                                                                                                                                                                                                                                                                            |
|----|----------------------------------|---------------------------|----------------------------------------|----------|-------|----------------------------------------------------------------------------------------------------------------------------------------------------------------------------------------------------------------------------------------------------------------------------------------------------------------------------------------------------------------------------------------------------------------------------------------------------------------------------------------------------------------------------|
| 27 | ribosomal large subunit assembly | 61 out of 804 genes, 7.6% | 105 out of 6473 background genes, 1.6% | 3.76E-26 | 0.00% | RPL6:C1_04040C_A:ERB1:NOP4:RRP6:C1_05360C_A:C1_06760C_A:JIP5:C1_09710C_A:C1_10970W_A:CSI2:C1_12440W_A:C1_12760W_A:C1_14080W_A:C2_01070W_A:C2_02540W_A:MAK5:C2_05160C_A:RPF2:RPL11:C2_10740C_A:BMS1:C3_01560W_A:C3_02040C_A:C3_02350W_A:C3_04370C_A:MAK21:C3_05160C_A:QDR2:C3_06370C_A:MDN1:C4_05010W_A:RMT2:SPB4:HAS1:C5_05340W_A:CIC1:C6_02230W_A:SPB1:RPA135:DBP7:FLU1:ENP2:UTP18:BUD22:PWP2:CR_01410C_A:YVH1:SGD1:CR_03940W_A:CR_04170W_A:NOC2:CR_05550C_A:SDA1:CR_06680C_A:TSR1:ELF1:SSF1:CR_09800C_A:CR_10470C_A:DRS1 |
|----|----------------------------------|---------------------------|----------------------------------------|----------|-------|----------------------------------------------------------------------------------------------------------------------------------------------------------------------------------------------------------------------------------------------------------------------------------------------------------------------------------------------------------------------------------------------------------------------------------------------------------------------------------------------------------------------------|

|           |                                                       |                                   |                                                   |          |       |                                                                                                                                                                                                                                                                                                                                                                                                                                                                                                                                                                                                                                                                                                                                                                                                                                                                                                                                                                                                                                                                                                                                                                                                                                                                                                                                                                                                                                                                                                                                                                                                                                                                                                                                                                                                                                                                                                                                                                                                                                                                                                                                                                                                                                                                                                                                                                                                                                                                                                                                                                                                                                                                   |
|-----------|-------------------------------------------------------|-----------------------------------|---------------------------------------------------|----------|-------|-------------------------------------------------------------------------------------------------------------------------------------------------------------------------------------------------------------------------------------------------------------------------------------------------------------------------------------------------------------------------------------------------------------------------------------------------------------------------------------------------------------------------------------------------------------------------------------------------------------------------------------------------------------------------------------------------------------------------------------------------------------------------------------------------------------------------------------------------------------------------------------------------------------------------------------------------------------------------------------------------------------------------------------------------------------------------------------------------------------------------------------------------------------------------------------------------------------------------------------------------------------------------------------------------------------------------------------------------------------------------------------------------------------------------------------------------------------------------------------------------------------------------------------------------------------------------------------------------------------------------------------------------------------------------------------------------------------------------------------------------------------------------------------------------------------------------------------------------------------------------------------------------------------------------------------------------------------------------------------------------------------------------------------------------------------------------------------------------------------------------------------------------------------------------------------------------------------------------------------------------------------------------------------------------------------------------------------------------------------------------------------------------------------------------------------------------------------------------------------------------------------------------------------------------------------------------------------------------------------------------------------------------------------------|
| 3464<br>1 | cellular<br>nitrogen<br>compound<br>metabolic process | 426 out of<br>804 genes,<br>53.0% | 2297 out of<br>6473<br>background genes,<br>35.5% | 2.00E-24 | 0.00% | RIM8:HBR1:C1_00510W_A:CNS1:RRS1:HMT1:C1_01150C_A:C1_01160C_A:C1_01470W_A:C1_01530C_A:C1_01900C_A:C1_02090C_A:ABP140:C1_02310C_A:C1_02430C_A:C1_02440C_A:C1_02450C_A:HOM6:PDE2:MIA40:TSR2:RPL6:ARO80:C1_03370W_A:C1_03830C_A:C1_04040C_A:C1_04120C_A:ERB1:NOP4:C1_04990C_A:RRP6:C1_05220C_A:C1_05230W_A:C1_05360C_A:RPS27A:RIB4:C1_05630C_A:FAL1:C1_05650W_A:NPL4:C1_06120C_A:C1_06540C_A:NOP6:C1_06760C_A:C1_06770W_A:MRPL19:C1_06800W_A:SUI2:C1_07090C_A:RIA1:YMC1:YPD1:PEX3:LHP1:C1_07510W_A:C1_07570C_A:ADE4:GCS1:ADE5,7:C1_07950C_A:FUN12:DRG1:GCD6:C1_08630W_A:MSS116:C1_09390W_A:GUA1:C1_09710C_A:DBP3:TPK1:C1_10620W_A:HNT1:C1_10970W_A:C1_11000C_A:C1_11370C_A:KRR1:GAR1:C1_11560C_A:C1_11900C_A:C1_11910W_A:CSI2:C1_12350W_A:C1_12440W_A:C1_12570C_A:CHR1:C1_12670C_A:C1_12760W_A:C1_13270W_A:C1_13330C_A:AGC1:C1_14080W_A:MPP10:FAV3:NDT80:HMA1:C2_00220C_A:C2_00280C_A:C2_00410C_A:C2_00880W_A:C2_01070W_A:C2_01510C_A:C2_01870C_A:C2_02420C_A:PRS1:C2_02540W_A:C2_02710C_A:HPT1:LIG4:ADE8:PRP3:C2_03360W_A:C2_03550C_A:SCH9:GCD7:C2_04120C_A:C2_04570W_A:SNU114:C2_04820W_A:CRK1:C2_05080C_A:MAK5:ERF1:C2_05160C_A:RPF2:RPC40:C2_05520W_A:KTI11:TES1:LAS1:CNT:ECM17:IMH3:RTA2:C2_06480W_A:RPL11:C2_06850W_A:SPE3:RPA12:NOC4:C2_07360W_A:RCL1:RNR22:C2_07610C_A:PRS5:C2_07920W_A:NSA1:ORF298:C2_08460C_A:RRP8:TIF4631:RPT6:SP011:C2_08840W_A:SLP2:PES1:RRP15:C2_09500W_A:C2_09660W_A:FCY21:CWC22:OCA1:PUS7:TIF11:C2_10740C_A:RPC11:C2_10810W_A:C3_00100W_A:UTP8:BUD21:SOF1:C3_00950C_A:BMS1:URA3:C3_01520C_A:C3_01560W_A:C3_02020W_A:C3_02040C_A:UTP4:C3_02350W_A:C3_03070W_A:C3_03330C_A:HBR3:URK1:C3_04370C_A:C3_04380C_A:ADE2:MAK21:RPP2B:SFP1:CEM1:C3_05140C_A:C3_05160C_A:WOR2:C3_05380W_A:QDR2:C3_05800W_A:C3_05860C_A:CTA4:NOG1:ELP3:DED1:C3_06150W_A:HNT2:C3_06370C_A:NSA2:PRP5:C3_06760W_A:C3_06830C_A:C3_06940W_A:NOP13:C3_07400W_A:C3_07480W_A:C3_07550C_A:RIT1:UTP9:DUR4:C4_00490W_A:RLP24:NMD5:C4_00690C_A:C4_00700C_A:C4_00810C_A:C4_00940W_A:MDN1:DAG7:RAT1:C4_01280C_A:PWP1:NIP1:C4_01670C_A:TOA2:C4_02850W_A:ZUO1:C4_02880C_A:C4_03040W_A:C4_03150W_A:C4_03720C_A:C4_03730C_A:C4_03740W_A:C4_03830W_A:RRP42:RAM1:ECM1:C4_04510W_A:SSZ1:C4_04720W_A:C4_04810C_A:AGP3:NBP35:C4_05260W_A:C4_05650W_A:C4_06210C_A:C4_06410W_A:NOP1:C4_06790W_A:YDC1:C4_07060W_A:C4_07100C_A:C4_07140W_A:C5_00260W_A:C5_00280C_A:DUS4:RMT2:URA4:C5_00920W_A:C5_00950C_A:BUD23:PUS4:C5_01430C_A:FYV5:SPB4:C5_01610W_A:MAS2:GIS2:C5_01930W_A:RIB2:C5_02010C_A:C5_02070C_A:RIX7:GCD11:TIF5:UTP13:C5_02730C_A:C5_03010W_A:RMS1:RPO26:FUR1:C5_03530C_A:C5_03670C_A:FGR27:HAM1:C5_03920C_A:URA7:CSU57:C5_04610W_A:HAS1:C5_04990W_A:C5_05340W_A:NOP5:FET31:C6_005 |
|-----------|-------------------------------------------------------|-----------------------------------|---------------------------------------------------|----------|-------|-------------------------------------------------------------------------------------------------------------------------------------------------------------------------------------------------------------------------------------------------------------------------------------------------------------------------------------------------------------------------------------------------------------------------------------------------------------------------------------------------------------------------------------------------------------------------------------------------------------------------------------------------------------------------------------------------------------------------------------------------------------------------------------------------------------------------------------------------------------------------------------------------------------------------------------------------------------------------------------------------------------------------------------------------------------------------------------------------------------------------------------------------------------------------------------------------------------------------------------------------------------------------------------------------------------------------------------------------------------------------------------------------------------------------------------------------------------------------------------------------------------------------------------------------------------------------------------------------------------------------------------------------------------------------------------------------------------------------------------------------------------------------------------------------------------------------------------------------------------------------------------------------------------------------------------------------------------------------------------------------------------------------------------------------------------------------------------------------------------------------------------------------------------------------------------------------------------------------------------------------------------------------------------------------------------------------------------------------------------------------------------------------------------------------------------------------------------------------------------------------------------------------------------------------------------------------------------------------------------------------------------------------------------------|

|  |  |  |  |  |  |                                                                                                                                                                                                                                                                                                                                                                                                                                                                                                                                                                                                                                                                                                                                                                                                                                                                                                                                                                                                                                                                                                             |
|--|--|--|--|--|--|-------------------------------------------------------------------------------------------------------------------------------------------------------------------------------------------------------------------------------------------------------------------------------------------------------------------------------------------------------------------------------------------------------------------------------------------------------------------------------------------------------------------------------------------------------------------------------------------------------------------------------------------------------------------------------------------------------------------------------------------------------------------------------------------------------------------------------------------------------------------------------------------------------------------------------------------------------------------------------------------------------------------------------------------------------------------------------------------------------------|
|  |  |  |  |  |  | 30C_A:C6_00640C_A:C6_01040C_A:RCN1:CIC1:C6_01890C_A:C6_01980C_A:C6_02230W_A:C6_02350C_A:NIP7:C6_02410W_A:C6_02560W_A:MRT4:POP4:C6_03210C_A:C6_03390W_A:FGR17:ALS5:SBA1:SHM2:SNQ2:SPB1:C6_04530C_A:C7_00160C_A:C7_00330C_A:C7_00380W_A:C7_00490C_A:RPA135:NOP15:C7_01030C_A:DBP7:GCN3:C7_01360C_A:FLU1:RAD14:C7_02100W_A:C7_02340C_A:C7_02460C_A:C7_02930C_A:ZCF29:CPY1:ISY1:ENP2:C7_03990C_A:C7_04140C_A:UTP18:MIS12:CR_00460C_A:CR_00670C_A:BUD22:PWP2:TRM1:CAB3:CR_01410C_A:CR_01700C_A:CR_01780W_A:CR_01950W_A:CR_02030C_A:CR_02420W_A:CR_02430C_A:RPC19:DBP2:RPC31:CR_02890C_A:SRP40:CR_03110W_A:CR_03230W_A:CR_03360W_A:KTI12:NCS2:YVH1:IFF3:SGD1:PRP42:CR_03940W_A:GCD1:CR_04110W_A:CR_04160C_A:CR_04170W_A:CR_04240C_A:CR_04300W_A:NHP2:ADE6:RPB8:CR_04920W_A:NOC2:CR_05550C_A:RNR3:MTG2:DBP8:VPS75:SFL1:RPL7:FGR50:CR_06680C_A:NMD3:CR_06840W_A:CR_07030C_A:CR_07080W_A:CR_07470W_A:CR_07640C_A:DBP6:IMP4:CR_08000C_A:NOP10:SSB1:RIO2:CR_08130W_A:TRM9:ATS1:CR_08330W_A:GSH2:TSR1:PRP8:CR_08940W_A:CR_09110C_A:CR_09140C_A:SSF1:CR_09800C_A:SIK1:UTP5:CR_10410C_A:CR_10430C_A:CR_10470C_A:DRS1:POP3 |
|--|--|--|--|--|--|-------------------------------------------------------------------------------------------------------------------------------------------------------------------------------------------------------------------------------------------------------------------------------------------------------------------------------------------------------------------------------------------------------------------------------------------------------------------------------------------------------------------------------------------------------------------------------------------------------------------------------------------------------------------------------------------------------------------------------------------------------------------------------------------------------------------------------------------------------------------------------------------------------------------------------------------------------------------------------------------------------------------------------------------------------------------------------------------------------------|

|      |                                     |                             |                                          |          |       |                                                                                                                                                                                                                                                                                                                                                                                                                                                                                                                                                                                                                                                                                                                                                                                                                                                                                                                                                                                                                                                                                                                                                                                                                                                                                                                                                                                                                                                                                                                                                                                                                                                                                                                                                                                                                                                                                                                                                                                                                                                                                                                                                                                                                                                                                                                                                                                                                                                                                                                                                                                                                                                                          |
|------|-------------------------------------|-----------------------------|------------------------------------------|----------|-------|--------------------------------------------------------------------------------------------------------------------------------------------------------------------------------------------------------------------------------------------------------------------------------------------------------------------------------------------------------------------------------------------------------------------------------------------------------------------------------------------------------------------------------------------------------------------------------------------------------------------------------------------------------------------------------------------------------------------------------------------------------------------------------------------------------------------------------------------------------------------------------------------------------------------------------------------------------------------------------------------------------------------------------------------------------------------------------------------------------------------------------------------------------------------------------------------------------------------------------------------------------------------------------------------------------------------------------------------------------------------------------------------------------------------------------------------------------------------------------------------------------------------------------------------------------------------------------------------------------------------------------------------------------------------------------------------------------------------------------------------------------------------------------------------------------------------------------------------------------------------------------------------------------------------------------------------------------------------------------------------------------------------------------------------------------------------------------------------------------------------------------------------------------------------------------------------------------------------------------------------------------------------------------------------------------------------------------------------------------------------------------------------------------------------------------------------------------------------------------------------------------------------------------------------------------------------------------------------------------------------------------------------------------------------------|
| 9059 | macromolecular biosynthetic process | 411 out of 804 genes, 51.1% | 2190 out of 6473 background genes, 33.8% | 3.45E-24 | 0.00% | RIM8:PHR2:HBR1:CNS1:RRS1:HMT1:C1_01150C_A:C1_01160C_A:C1_01470W_A:C1_01530C_A:C1_01900C_A:C1_02090C_A:ABP140:C1_02310C_A:C1_02430C_A:C1_02450C_A:HOM6:PDE2:MIA40:TSR2:RPL6:ARO80:MAS1:C1_03370W_A:C1_03790C_A:C1_03830C_A:C1_04040C_A:C1_04120C_A:ERB1:NOP4:C1_04990C_A:RRP6:C1_05220C_A:C1_05230W_A:C1_05360C_A:RPS27A:C1_05630C_A:FAL1:C1_05650W_A:C1_06540C_A:NOP6:C1_06760C_A:C1_06770W_A:MRPL19:C1_06800W_A:SUI2:C1_07090C_A:RIA1:YPD1:PEX3:LHP1:C1_07510W_A:C1_07570C_A:C1_07950C_A:FUN12:DRG1:GCD6:C1_08630W_A:MSS116:C1_09390W_A:C1_09710C_A:DBP3:TPK1:C1_10340W_A:C1_10620W_A:C1_10970W_A:C1_11000C_A:C1_11370C_A:KRR1:C1_11560C_A:C1_11900C_A:C1_11910W_A:CSI2:C1_12350W_A:C1_12440W_A:C1_12570C_A:CHR1:C1_12670C_A:C1_12760W_A:C1_13260W_A:HSP70:C1_14080W_A:FTR1:MPP10:FAV3:NDT80:HMA1:C2_00220C_A:C2_00280C_A:C2_00410C_A:C2_00880W_A:C2_01070W_A:C2_01510C_A:C2_01870C_A:C2_02420C_A:PRS1:C2_02540W_A:C2_02710C_A:LIG4:PRP3:MNN42:SCH9:GCD7:C2_04120C_A:C2_04570W_A:SNU114:C2_04820W_A:CRK1:C2_05080C_A:MAK5:ERF1:C2_05160C_A:RPF2:RPC40:C2_05520W_A:KTI11:TES1:LAS1:CNT:ECM17:RTA2:C2_06480W_A:RPL11:C2_06850W_A:SPE3:RPA12:NOC4:C2_07360W_A:SSC1:RCL1:C2_07610C_A:PRS5:C2_07920W_A:NSA1:ORF298:RRP8:TIF4631:C2_08840W_A:SLP2:PES1:RRP15:C2_09500W_A:C2_09660W_A:FCY21:CWC22:OCA1:PUS7:MTR2:TIF11:C2_10740C_A:RPC11:C2_10810W_A:C3_00100W_A:UTP8:BUD21:SOF1:C3_00950C_A:BMS1:C3_01520C_A:C3_01560W_A:C3_02020W_A:C3_02030W_A:C3_02040C_A:UTP4:C3_02180C_A:C3_02350W_A:C3_03070W_A:C3_03330C_A:HBR3:SAP9:URK1:C3_04370C_A:C3_04380C_A:MAK21:RPP2B:SFP1:CEM1:C3_05140C_A:C3_05160C_A:SAP3:C3_05380W_A:QDR2:C3_05800W_A:C3_05860C_A:CTA4:NOG1:ELP3:DED1:C3_06150W_A:C3_06370C_A:NSA2:PRP5:C3_06760W_A:C3_06830C_A:NOP13:C3_07400W_A:C3_07480W_A:C3_07550C_A:RIT1:UTP9:DUR4:C4_00490W_A:RLP24:NMD5:C4_00690C_A:C4_00810C_A:C4_00940W_A:MDN1:DAG7:RAT1:C4_01280C_A:PWP1:NIP1:C4_01670C_A:TOA2:HGH1:C4_02850W_A:ZUO1:C4_02880C_A:C4_03040W_A:C4_03150W_A:C4_03720C_A:C4_03730C_A:C4_03740W_A:C4_03830W_A:RRP42:RAM1:C4_04090C_A:ECM1:C4_04510W_A:SSZ1:C4_04720W_A:C4_04810C_A:AGP3:NBP35:C4_05260W_A:C4_05650W_A:C4_06210C_A:C4_06410W_A:MNN4:NOP1:C4_06790W_A:MNN46:C4_07060W_A:C4_07100C_A:C4_07140W_A:C5_00280C_A:DUS4:RMT2:C5_00920W_A:C5_00950C_A:BUD23:PUS4:C5_01430C_A:FYV5:SPB4:C5_01610W_A:MAS2:GIS2:C5_01930W_A:RIB2:C5_02010C_A:C5_02070C_A:RIX7:GCD11:TIF5:UTP13:C5_02730C_A:C5_03010W_A:RMS1:RPO26:FUR1:C5_03530C_A:C5_03550W_A:C5_03670C_A:FGR27:C5_03920C_A:C5_03970W_A:CSU57:C5_04610W_A:HAS1:C5_04990W_A:C5_05340W_A:NOP5:FET31:C6_00530C_A:C6_00640C_A:C6_01040C_A:RCN1:CIC1:C6_01890C_A:C6_01980C_A:C6_02230W_A:C6_02350C_A:NIP7:MRT4:POP4:E |
|------|-------------------------------------|-----------------------------|------------------------------------------|----------|-------|--------------------------------------------------------------------------------------------------------------------------------------------------------------------------------------------------------------------------------------------------------------------------------------------------------------------------------------------------------------------------------------------------------------------------------------------------------------------------------------------------------------------------------------------------------------------------------------------------------------------------------------------------------------------------------------------------------------------------------------------------------------------------------------------------------------------------------------------------------------------------------------------------------------------------------------------------------------------------------------------------------------------------------------------------------------------------------------------------------------------------------------------------------------------------------------------------------------------------------------------------------------------------------------------------------------------------------------------------------------------------------------------------------------------------------------------------------------------------------------------------------------------------------------------------------------------------------------------------------------------------------------------------------------------------------------------------------------------------------------------------------------------------------------------------------------------------------------------------------------------------------------------------------------------------------------------------------------------------------------------------------------------------------------------------------------------------------------------------------------------------------------------------------------------------------------------------------------------------------------------------------------------------------------------------------------------------------------------------------------------------------------------------------------------------------------------------------------------------------------------------------------------------------------------------------------------------------------------------------------------------------------------------------------------------|



|  |  |  |  |  |  |                                                                                                                                                                                                                                                                                                                                                                                                                                                                                                                                                                                                                                                                                                                                                                                                                                                                                                                                                                                               |
|--|--|--|--|--|--|-----------------------------------------------------------------------------------------------------------------------------------------------------------------------------------------------------------------------------------------------------------------------------------------------------------------------------------------------------------------------------------------------------------------------------------------------------------------------------------------------------------------------------------------------------------------------------------------------------------------------------------------------------------------------------------------------------------------------------------------------------------------------------------------------------------------------------------------------------------------------------------------------------------------------------------------------------------------------------------------------|
|  |  |  |  |  |  | MF1:C6_03210C_A:C6_03390W_A:FGR17:ALS5:SBA1:SHM2:SNQ2:SPB1:C6_04530C_A:C7_00160C_A:C7_00330C_A:C7_00380W_A:C7_00490C_A:RPA135:NOP15:C7_01030C_A:DBP7:GCN3:C7_01360C_A:FLU1:C7_02100W_A:C7_02340C_A:C7_02460C_A:C7_02930C_A:ZCF29:CPY1:ISY1:ENP2:C7_03990C_A:C7_04140C_A:UTP18:CR_00460C_A:CR_00670C_A:BUD22:BMT3:PWP2:TRM1:CR_01410C_A:CR_01700C_A:CR_01780W_A:CR_01950W_A:CR_02030C_A:CR_02420W_A:CR_02430C_A:RPC19:DBP2:RPC31:CR_02890C_A:SRP40:CR_03110W_A:CR_03230W_A:CR_03360W_A:KTI12:NCS2:YVH1:IFF3:PRP42:CR_03940W_A:GCD1:MEX67:CR_04110W_A:CR_04160C_A:CR_04170W_A:CR_04240C_A:CR_04300W_A:NHP2:RPB8:CR_04920W_A:NOC2:CR_05550C_A:RNR3:MTG2:DBP8:VPS75:SFL1:RPL7:FGR50:CR_06680C_A:NMD3:CR_06840W_A:CR_06980W_A:CR_07030C_A:CR_07080W_A:CR_07470W_A:CR_07640C_A:DBP6:IMP4:CR_08000C_A:NOP10:SSB1:RIO2:CR_08130W_A:TRM9:HSP104:ATS1:CR_08330W_A:GSH2:TSR1:PRP8:CR_08940W_A:CR_09110C_A:ELF1:SSF1:CR_09800C_A:SIK1:UTP5:AHA1:CR_10400W_A:CR_10410C_A:CR_10430C_A:CR_10470C_A:DRS1:POP3 |
|--|--|--|--|--|--|-----------------------------------------------------------------------------------------------------------------------------------------------------------------------------------------------------------------------------------------------------------------------------------------------------------------------------------------------------------------------------------------------------------------------------------------------------------------------------------------------------------------------------------------------------------------------------------------------------------------------------------------------------------------------------------------------------------------------------------------------------------------------------------------------------------------------------------------------------------------------------------------------------------------------------------------------------------------------------------------------|

|       |                               |                             |                                          |          |       |                                                                                                                                                                                                                                                                                                                                                                                                                                                                                                                                                                                                                                                                                                                                                                                                                                                                                                                                                                                                                                                                                                                                                                                                                                                                                                                                                                                                                                                                                                                                                                                                                                                                                                                                                                                                                                                                                                                                                                                                                                                                                                                                                                                                                                                                                                                                                                                                                                                                                                                                                                                                                                                                         |
|-------|-------------------------------|-----------------------------|------------------------------------------|----------|-------|-------------------------------------------------------------------------------------------------------------------------------------------------------------------------------------------------------------------------------------------------------------------------------------------------------------------------------------------------------------------------------------------------------------------------------------------------------------------------------------------------------------------------------------------------------------------------------------------------------------------------------------------------------------------------------------------------------------------------------------------------------------------------------------------------------------------------------------------------------------------------------------------------------------------------------------------------------------------------------------------------------------------------------------------------------------------------------------------------------------------------------------------------------------------------------------------------------------------------------------------------------------------------------------------------------------------------------------------------------------------------------------------------------------------------------------------------------------------------------------------------------------------------------------------------------------------------------------------------------------------------------------------------------------------------------------------------------------------------------------------------------------------------------------------------------------------------------------------------------------------------------------------------------------------------------------------------------------------------------------------------------------------------------------------------------------------------------------------------------------------------------------------------------------------------------------------------------------------------------------------------------------------------------------------------------------------------------------------------------------------------------------------------------------------------------------------------------------------------------------------------------------------------------------------------------------------------------------------------------------------------------------------------------------------------|
| 44249 | cellular biosynthetic process | 446 out of 804 genes, 55.5% | 2485 out of 6473 background genes, 38.4% | 9.82E-23 | 0.00% | RIM8:PHR2:HBR1:C1_00510W_A:CNS1:RRS1:HMT1:C1_01150C_A:C1_01160C_A:C1_01470W_A:C1_01530C_A:C1_01900C_A:C1_02090C_A:ABP140:C1_02310C_A:C1_02430C_A:C1_02450C_A:HOM6:PDE2:MIA40:TSR2:RPL6:ARO80:MAS1:C1_03370W_A:EHT1:C1_03790C_A:C1_03830C_A:C1_04040C_A:C1_04120C_A:ERB1:NOP4:C1_04990C_A:RHD1:RRP6:C1_05220C_A:C1_05230W_A:C1_05360C_A:RPS27A:RIB4:C1_05630C_A:FAL1:C1_05650W_A:C1_06540C_A:NOP6:C1_06760C_A:C1_06770W_A:MRPL19:C1_06800W_A:SUI2:C1_07090C_A:RIA1:YMC1:YPD1:PEX3:LHP1:C1_07510W_A:C1_07570C_A:ADE4:GCS1:ADE5,7:C1_07950C_A:FUN12:DRG1:GCD6:C1_08630W_A:MSS116:C1_09390W_A:GUA1:C1_09710C_A:DBP3:TPK1:C1_10340W_A:C1_10620W_A:C1_10970W_A:C1_11000C_A:C1_11370C_A:KRR1:C1_11560C_A:C1_11900C_A:C1_11910W_A:CSI2:C1_12350W_A:C1_12440W_A:C1_12570C_A:CHR1:C1_12670C_A:C1_12760W_A:C1_13260W_A:C1_13270W_A:C1_13330C_A:AGC1:HSP70:C1_14080W_A:FTR1:MPP10:FAV3:NDT80:HMA1:C2_00220C_A:C2_00280C_A:C2_00410C_A:C2_00880W_A:MXR1:C2_01070W_A:C2_01510C_A:C2_01870C_A:C2_02420C_A:PRS1:C2_02540W_A:SER2:C2_02710C_A:HPT1:LIG4:ADE8:PRP3:C2_03360W_A:MNN42:SCH9:GCD7:C2_04120C_A:BAT21:C2_04570W_A:SNU114:C2_04820W_A:CRK1:C2_05080C_A:MAK5:ERF1:C2_05160C_A:RPF2:RPC40:C2_05520W_A:KTI1:TES1:LAS1:CNT:ECM17:IMH3:RTA2:C2_06480W_A:RPL11:C2_06850W_A:SPE3:RPA12:NOC4:C2_07360W_A:SSC1:C2_07410W_A:RCL1:RNR22:C2_07610C_A:PRS5:C2_07920W_A:NSA1:ORF298:RRP8:TIF4631:C2_08840W_A:SLP2:PES1:RRP15:C2_09500W_A:C2_09660W_A:LEU42:FCY21:CWC22:OCA1:PUS7:MTR2:TIF11:C2_10740C_A:RPC11:C2_10810W_A:C3_00100W_A:UTP8:BUD21:SOF1:C3_00950C_A:BMS1:URA3:C3_01520C_A:C3_01560W_A:C3_02020W_A:C3_02030W_A:C3_02040C_A:UTP4:C3_02180C_A:C3_02350W_A:PHA2:C3_03070W_A:C3_03330C_A:HBR3:SAP9:URK1:C3_04370C_A:C3_04380C_A:ADE2:MAK21:RPP2B:SFP1:CEM1:C3_05140C_A:C3_05160C_A:SAP3:C3_05380W_A:QDR2:C3_05800W_A:C3_05860C_A:CTA4:NOG1:ELP3:DED1:C3_06150W_A:C3_06370C_A:NSA2:PRP5:C3_06760W_A:C3_06830C_A:NOP13:C3_07400W_A:C3_07480W_A:C3_07550C_A:RIT1:UTP9:DUR4:C4_00490W_A:RLP24:NMD5:C4_00690C_A:C4_00810C_A:C4_00940W_A:MDN1:DAG7:RAT1:C4_01280C_A:PWP1:NIP1:C4_01670C_A:TOA2:HGH1:C4_02850W_A:ZUO1:C4_02880C_A:C4_03040W_A:C4_03150W_A:C4_03720C_A:C4_03730C_A:C4_03740W_A:C4_03830W_A:RRP42:RAM1:C4_04090C_A:ECM1:C4_04510W_A:SSZ1:C4_04720W_A:C4_04810C_A:AGP3:NBP35:C4_05260W_A:C4_05650W_A:C4_06210C_A:C4_06410W_A:MNN4:NOP1:C4_06790W_A:MNN46:MET16:YDC1:C4_07060W_A:C4_07100C_A:C4_07140W_A:C5_00260W_A:C5_00280C_A:DUS4:RMT2:URA4:C5_00920W_A:C5_00950C_A:BUD23:PUS4:C5_01430C_A:FYV5:SPB4:C5_01610W_A:MAS2:GIS2:C5_01930W_A:RIB2:C5_02010C_A:C5_02070C_A:RIX7:GCD11:TIF5:UTP13:C5_02730C_A:C5_03010W_A:RMS1:RPO26:FUR1:C5_03530C_A:C5_03550W_A:C5_03670C_A:FGR27 |
|-------|-------------------------------|-----------------------------|------------------------------------------|----------|-------|-------------------------------------------------------------------------------------------------------------------------------------------------------------------------------------------------------------------------------------------------------------------------------------------------------------------------------------------------------------------------------------------------------------------------------------------------------------------------------------------------------------------------------------------------------------------------------------------------------------------------------------------------------------------------------------------------------------------------------------------------------------------------------------------------------------------------------------------------------------------------------------------------------------------------------------------------------------------------------------------------------------------------------------------------------------------------------------------------------------------------------------------------------------------------------------------------------------------------------------------------------------------------------------------------------------------------------------------------------------------------------------------------------------------------------------------------------------------------------------------------------------------------------------------------------------------------------------------------------------------------------------------------------------------------------------------------------------------------------------------------------------------------------------------------------------------------------------------------------------------------------------------------------------------------------------------------------------------------------------------------------------------------------------------------------------------------------------------------------------------------------------------------------------------------------------------------------------------------------------------------------------------------------------------------------------------------------------------------------------------------------------------------------------------------------------------------------------------------------------------------------------------------------------------------------------------------------------------------------------------------------------------------------------------------|

|  |  |  |  |  |  |                                                                                                                                                                                                                                                                                                                                                                                                                                                                                                                                                                                                                                                                                                                                                                                                                                                                                                                                                                                                                                                                                                                                                                                                                                |
|--|--|--|--|--|--|--------------------------------------------------------------------------------------------------------------------------------------------------------------------------------------------------------------------------------------------------------------------------------------------------------------------------------------------------------------------------------------------------------------------------------------------------------------------------------------------------------------------------------------------------------------------------------------------------------------------------------------------------------------------------------------------------------------------------------------------------------------------------------------------------------------------------------------------------------------------------------------------------------------------------------------------------------------------------------------------------------------------------------------------------------------------------------------------------------------------------------------------------------------------------------------------------------------------------------|
|  |  |  |  |  |  | :C5_03920C_A:C5_03970W_A:URA7:CSU57:C5_04610W_A:HAS1:C5_04990W_A:C5_05340W_A:NOP5:FET31:C6_00530C_A:C6_00640C_A:HAL21:C6_01040C_A:RCN1:CIC1:C6_01890C_A:C6_01980C_A:C6_02230W_A:C6_02350C_A:NIP7:MRT4:POP4:EMF1:C6_03210C_A:C6_03390W_A:FGR17:ALS5:SBA1:SHM2:SNQ2:SPB1:C6_04530C_A:C7_00160C_A:C7_00330C_A:C7_00380W_A:C7_00490C_A:RPA135:NOP15:C7_01030C_A:DBP7:GCN3:C7_01360C_A:FLU1:C7_02100W_A:C7_02340C_A:C7_02460C_A:C7_02930C_A:ZCF29:CPY1:ISY1:ENP2:C7_03990C_A:C7_04140C_A:UTP18:MIS12:CR_00460C_A:CR_00670C_A:BUD22:BMT3:PWP2:TRM1:CAB3:CR_01410C_A:CR_01700C_A:CR_01780W_A:CR_01950W_A:CR_02030C_A:CR_02420W_A:CR_02430C_A:RPC19:DBP2:RPC31:CR_02890C_A:SRP40:CR_03110W_A:CR_03230W_A:CR_03360W_A:KTI12:NCS2:YVH1:IFF3:PRP42:CR_03940W_A:GCD1:MEX67:CR_04110W_A:CR_04160C_A:CR_04170W_A:CR_04240C_A:CR_04300W_A:NHP2:ADE6:RPB8:CR_04920W_A:NOC2:CR_05550C_A:RNR3:MTG2:DBP8:VPS75:SFL1:RPL7:FGR50:CR_06680C_A:NMD3:CR_06840W_A:CR_06980W_A:CR_07030C_A:CR_07080W_A:CR_07470W_A:CR_07640C_A:DBP6:IMP4:CR_08000C_A:NOP10:SSB1:RIO2:CR_08130W_A:TRM9:HSP104:ATS1:CR_08330W_A:CYS3:GSH2:TSR1:PRP8:CR_08940W_A:CR_09110C_A:ELF1:SSF1:CR_09800C_A:SIK1:UTP5:AHA1:CR_10400W_A:CR_10410C_A:CR_10430C_A:CR_10470C_A:DRS1:POP3 |
|--|--|--|--|--|--|--------------------------------------------------------------------------------------------------------------------------------------------------------------------------------------------------------------------------------------------------------------------------------------------------------------------------------------------------------------------------------------------------------------------------------------------------------------------------------------------------------------------------------------------------------------------------------------------------------------------------------------------------------------------------------------------------------------------------------------------------------------------------------------------------------------------------------------------------------------------------------------------------------------------------------------------------------------------------------------------------------------------------------------------------------------------------------------------------------------------------------------------------------------------------------------------------------------------------------|

|     |                                   |                                   |                                                     |          |       |                                                                                                                                                                                                                                                                                                                                                                                                                                                                                                                                                                                                                                                                                                                                                                                                                                                                                                                                                                                                                                                                                                                                                                                                                              |
|-----|-----------------------------------|-----------------------------------|-----------------------------------------------------|----------|-------|------------------------------------------------------------------------------------------------------------------------------------------------------------------------------------------------------------------------------------------------------------------------------------------------------------------------------------------------------------------------------------------------------------------------------------------------------------------------------------------------------------------------------------------------------------------------------------------------------------------------------------------------------------------------------------------------------------------------------------------------------------------------------------------------------------------------------------------------------------------------------------------------------------------------------------------------------------------------------------------------------------------------------------------------------------------------------------------------------------------------------------------------------------------------------------------------------------------------------|
| 470 | maturati<br>on of<br>LSU-<br>rRNA | 131 out of<br>804 genes,<br>16.3% | 431 out of<br>6473<br>backgroun<br>d genes,<br>6.7% | 8.13E-22 | 0.00% | C1_02090C_A:C1_02450C_A:PDE2:C1_03830C_A:C1_04120C_A:NOP4:C1_05220C_A:C1_05650W_A:C1_06540C_A:NOP6:C1_06800W_A:C1_07090C_A:RIA1:YPD1:PEX3:C1_07510W_A:C1_07570C_A:C1_08630W_A:C1_09390W_A:DBP3:TPK1:C1_11000C_A:C1_11560C_A:C1_11900C_A:C1_11910W_A:CSI2:C1_12350W_A:C1_12440W_A:C1_12570C_A:CHR1:C1_12760W_A:C2_00280C_A:C2_02540W_A:PRP3:SCH9:C2_04120C_A:SNU114:MAK5:RPF2:TES1:LAS1:CNT:ECM17:C2_06850W_A:RRP8:C2_08840W_A:RRP15:CWC22:OCA1:C2_10740C_A:C3_00950C_A:C3_01560W_A:C3_0330C_A:URK1:C3_04370C_A:CEM1:C3_05160C_A:C3_05380W_A:QDR2:C3_05800W_A:C3_05860C_A:NSA2:PRP5:C3_07550C_A:DUR4:NMD5:MDN1:RAT1:C4_01280C_A:C4_01670C_A:C4_02880C_A:C4_03150W_A:C4_03720C_A:C4_03830W_A:RAM1:AGP3:C4_05260W_A:C4_06210C_A:C4_06410W_A:C4_06790W_A:C4_07060W_A:C4_07100C_A:RMT2:C5_00920W_A:C5_01430C_A:SPB4:C5_01930W_A:C5_02010C_A:C5_03010W_A:RMS1:C5_03920C_A:C5_04610W_A:HAS1:C5_04990W_A:RCN1:CI C1:C6_01890C_A:C6_02230W_A:NIP7:C6_03210C_A:C6_03390W_A:ALS5:SNQ2:SPB1:NOP15:DBP7:C7_01360C_A:FLU1:C7_02460C_A:C7_02930C_A:ISY1:CR_01700C_A:CR_02030C_A:RPC19:CR_02890C_A:CR_03360W_A:PRP42:CR_03940W_A:CR_04170W_A:CR_05550C_A:RNR3:VPS75:SFL1:RPL7:CR_07080W_A:CR_07640C_A:DBP6:CR_08000C_A:PRP8:CR_09110C_A:SSF1 |
|-----|-----------------------------------|-----------------------------------|-----------------------------------------------------|----------|-------|------------------------------------------------------------------------------------------------------------------------------------------------------------------------------------------------------------------------------------------------------------------------------------------------------------------------------------------------------------------------------------------------------------------------------------------------------------------------------------------------------------------------------------------------------------------------------------------------------------------------------------------------------------------------------------------------------------------------------------------------------------------------------------------------------------------------------------------------------------------------------------------------------------------------------------------------------------------------------------------------------------------------------------------------------------------------------------------------------------------------------------------------------------------------------------------------------------------------------|

|     |                                                                                                                                       |                                   |                                                     |          |       |                                                                                                                                                                                                                                                                                                                                                                                                                                                                                                                                                                                                                                                                                                                                                                                                                                                                                                                                                                                                                                                                                                                                                                                                                  |
|-----|---------------------------------------------------------------------------------------------------------------------------------------|-----------------------------------|-----------------------------------------------------|----------|-------|------------------------------------------------------------------------------------------------------------------------------------------------------------------------------------------------------------------------------------------------------------------------------------------------------------------------------------------------------------------------------------------------------------------------------------------------------------------------------------------------------------------------------------------------------------------------------------------------------------------------------------------------------------------------------------------------------------------------------------------------------------------------------------------------------------------------------------------------------------------------------------------------------------------------------------------------------------------------------------------------------------------------------------------------------------------------------------------------------------------------------------------------------------------------------------------------------------------|
| 463 | maturati<br>on of<br>LSU-<br>rRNA<br>from<br>tricistroni<br>c rRNA<br>transcrip<br>t (SSU-<br>rRNA,<br>5.8S<br>rRNA,<br>LSU-<br>rRNA) | 130 out of<br>804 genes,<br>16.2% | 429 out of<br>6473<br>backgroun<br>d genes,<br>6.6% | 1.74E-21 | 0.00% | C1_02090C_A:C1_02450C_A:PDE2:C1_03830C_A:C1_04120C_A:NOP4:C1_05220C_A:C1_05650W_A:C1_06540C_A:NOP6:C1_06800W_A:C1_07090C_A:RIA1:YPD1:PEX3:C1_07510W_A:C1_07570C_A:C1_08630W_A:C1_09390W_A:DBP3:TPK1:C1_11000C_A:C1_11560C_A:C1_11900C_A:C1_11910W_A:CSI2:C1_12350W_A:C1_12440W_A:C1_12570C_A:CHR1:C1_12760W_A:C2_00280C_A:C2_02540W_A:PRP3:SCH9:C2_04120C_A:SNU114:MAK5:RPF2:TES1:LAS1:CNT:ECM17:C2_06850W_A:RRP8:RRP15:CWC22:OCA1:C2_10740C_A:C3_00950C_A:C3_01560W_A:C3_03330C_A:URK1:C3_04370C_A:CEM1:C3_05160C_A:C3_05380W_A:QDR2:C3_05800W_A:C3_05860C_A:NSA2:PRP5:C3_07550C_A:DUR4:NMD5:MDN1:RAT1:C4_01280C_A:C4_01670C_A:C4_02880C_A:C4_03150W_A:C4_03720C_A:C4_03830W_A:RAM1:AGP3:C4_05260W_A:C4_06210C_A:C4_06410W_A:C4_06790W_A:C4_07060W_A:C4_07100C_A:RMT2:C5_00920W_A:C5_01430C_A:SPB4:C5_01930W_A:C5_02010C_A:C5_03010W_A:RMS1:C5_03920C_A:C5_04610W_A:HAS1:C5_04990W_A:RCN1:CIC1:C6_01890C_A:C6_02230W_A:NIP7:C6_03210C_A:C6_03390W_A:ALS5:SNQ2:SPB1:NOP15:DBP7:C7_01360C_A:FLU1:C7_02460C_A:C7_02930C_A:ISY1:CR_01700C_A:CR_02030C_A:RPC19:CR_02890C_A:CR_03360W_A:PRP42:CR_03940W_A:CR_04170W_A:CR_05550C_A:RNR3:VPS75:SFL1:RPL7:CR_07080W_A:CR_07640C_A:DBP6:CR_08000C_A:PRP8:CR_09110C_A:SSF1 |
|-----|---------------------------------------------------------------------------------------------------------------------------------------|-----------------------------------|-----------------------------------------------------|----------|-------|------------------------------------------------------------------------------------------------------------------------------------------------------------------------------------------------------------------------------------------------------------------------------------------------------------------------------------------------------------------------------------------------------------------------------------------------------------------------------------------------------------------------------------------------------------------------------------------------------------------------------------------------------------------------------------------------------------------------------------------------------------------------------------------------------------------------------------------------------------------------------------------------------------------------------------------------------------------------------------------------------------------------------------------------------------------------------------------------------------------------------------------------------------------------------------------------------------------|

|      |                      |                             |                                          |          |       |                                                                                                                                                                                                                                                                                                                                                                                                                                                                                                                                                                                                                                                                                                                                                                                                                                                                                                                                                                                                                                                                                                                                                                                                                                                                                                                                                                                                                                                                                                                                                                                                                                                                                                                                                                                                                                                                                                                                                                                                                                                                                                                                                                                                                                                                                                                                                                                                                                                                                                                                                                                                                                                                         |
|------|----------------------|-----------------------------|------------------------------------------|----------|-------|-------------------------------------------------------------------------------------------------------------------------------------------------------------------------------------------------------------------------------------------------------------------------------------------------------------------------------------------------------------------------------------------------------------------------------------------------------------------------------------------------------------------------------------------------------------------------------------------------------------------------------------------------------------------------------------------------------------------------------------------------------------------------------------------------------------------------------------------------------------------------------------------------------------------------------------------------------------------------------------------------------------------------------------------------------------------------------------------------------------------------------------------------------------------------------------------------------------------------------------------------------------------------------------------------------------------------------------------------------------------------------------------------------------------------------------------------------------------------------------------------------------------------------------------------------------------------------------------------------------------------------------------------------------------------------------------------------------------------------------------------------------------------------------------------------------------------------------------------------------------------------------------------------------------------------------------------------------------------------------------------------------------------------------------------------------------------------------------------------------------------------------------------------------------------------------------------------------------------------------------------------------------------------------------------------------------------------------------------------------------------------------------------------------------------------------------------------------------------------------------------------------------------------------------------------------------------------------------------------------------------------------------------------------------------|
| 9058 | biosynthetic process | 454 out of 804 genes, 56.5% | 2586 out of 6473 background genes, 40.0% | 5.33E-21 | 0.00% | RIM8:PHR2:HBR1:C1_00510W_A:CNS1:RRS1:HMT1:C1_01150C_A:C1_01160C_A:C1_01470W_A:C1_01530C_A:C1_01900C_A:C1_02090C_A:ABP140:C1_02310C_A:C1_02430C_A:C1_02450C_A:HOM6:PDE2:MIA40:TSR2:RPL6:ARO80:MAS1:C1_03370W_A:EHT1:C1_03790C_A:C1_03830C_A:C1_04040C_A:C1_04120C_A:ERB1:NOP4:C1_04990C_A:RHD1:RRP6:C1_05220C_A:C1_05230W_A:C1_05360C_A:RPS27A:RIB4:C1_05630C_A:FAL1:C1_05650W_A:C1_06540C_A:NOP6:C1_06760C_A:C1_06770W_A:MRPL19:C1_06800W_A:SUI2:C1_07090C_A:RIA1:YMC1:YPD1:PEX3:LHP1:C1_07510W_A:C1_07570C_A:ADE4:GCS1:ADE5,7:C1_07950C_A:FUN12:DRG1:GCD6:C1_08630W_A:MSS116:C1_09390W_A:GUA1:C1_09610W_A:C1_09710C_A:DBP3:TPK1:C1_10340W_A:C1_10620W_A:C1_10970W_A:C1_11000C_A:C1_11370C_A:KRR1:C1_11560C_A:C1_11900C_A:C1_11910W_A:CSI2:C1_12350W_A:C1_12440W_A:C1_12570C_A:CHR1:C1_12670C_A:C1_12760W_A:PSA2:C1_13260W_A:C1_13270W_A:C1_13330C_A:AGC1:HSP70:C1_14080W_A:FTR1:MPP10:FAV3:NDT80:HMA1:C2_00220C_A:C2_00280C_A:C2_00410C_A:C2_00880W_A:MXR1:C2_01070W_A:C2_01510C_A:C2_01870C_A:C2_02420C_A:PRS1:C2_02540W_A:SER2:C2_02710C_A:HPT1:LIG4:ADE8:PRP3:C2_03360W_A:MNN42:SCH9:GCD7:C2_04120C_A:BAT21:C2_04570W_A:SNU114:C2_04820W_A:CRK1:C2_05080C_A:MAK5:ERF1:C2_05160C_A:RPF2:RPC40:C2_05520W_A:KTI11:TES1:LAS1:CNT:ECM17:IMH3:RTA2:C2_06480W_A:RPL11:C2_06850W_A:SPE3:RPA12:NOC4:C2_07360W_A:SSC1:C2_07410W_A:RCL1:RNR22:C2_07610C_A:PRS5:C2_07920W_A:NSA1:ORF298:RRP8:TIF4631:C2_08840W_A:SLP2:PES1:RRP15:C2_09500W_A:C2_09660W_A:LEU42:FCY21:YOR1:CWC22:OCA1:GPD1:PUS7:MTR2:TIF11:C2_10740C_A:RPC11:C2_10810W_A:C3_00100W_A:UTP8:BUD21:SOF1:C3_00950C_A:BMS1:URA3:C3_01520C_A:C3_01560W_A:C3_02020W_A:C3_02030W_A:C3_02040C_A:UTP4:C3_02180C_A:C3_02350W_A:PHA2:C3_03070W_A:C3_03330C_A:HBR3:SAP9:URK1:C3_04370C_A:C3_04380C_A:ADE2:MAK21:RPP2B:SFP1:CEM1:C3_05140C_A:C3_05160C_A:SAP3:C3_05380W_A:QDR2:C3_05800W_A:C3_05860C_A:CTA4:NOG1:ELP3:DED1:C3_06150W_A:C3_06370C_A:NSA2:PRP5:C3_06760W_A:C3_06830C_A:NOP13:C3_07400W_A:C3_07480W_A:C3_07550C_A:RIT1:C3_07670W_A:UTP9:DUR4:C4_00490W_A:RLP24:NMD5:C4_00690C_A:C4_00810C_A:C4_00940W_A:MDN1:DAG7:RAT1:C4_01280C_A:PWP1:NIP1:C4_01670C_A:TOA2:HGH1:C4_02850W_A:ZUO1:C4_02880C_A:C4_03040W_A:C4_03150W_A:C4_03720C_A:C4_03730C_A:C4_03740W_A:C4_03830W_A:RRP42:RAM1:C4_04090C_A:ECM1:C4_04510W_A:SSZ1:C4_04720W_A:C4_04810C_A:AGP3:NBP35:C4_05260W_A:C4_05650W_A:C4_06210C_A:C4_06410W_A:MNN4:NOP1:C4_06790W_A:MNN46:MET16:YDC1:C4_07060W_A:C4_07100C_A:C4_07140W_A:VIP1:C5_00260W_A:C5_00280C_A:DUS4:RMT2:URA4:C5_00920W_A:C5_00950C_A:BUD23:PUS4:C5_01430C_A:FYV5:SPB4:C5_01610W_A:MAS2:GIS2:C5_01930W_A:RIB2:C5_02010C_A:C5_02070C_A:RIX7:GCD11:TIF5:UTP13:C5_02730C_A:C5_03010W_A:RMS1:RPO26:F |
|------|----------------------|-----------------------------|------------------------------------------|----------|-------|-------------------------------------------------------------------------------------------------------------------------------------------------------------------------------------------------------------------------------------------------------------------------------------------------------------------------------------------------------------------------------------------------------------------------------------------------------------------------------------------------------------------------------------------------------------------------------------------------------------------------------------------------------------------------------------------------------------------------------------------------------------------------------------------------------------------------------------------------------------------------------------------------------------------------------------------------------------------------------------------------------------------------------------------------------------------------------------------------------------------------------------------------------------------------------------------------------------------------------------------------------------------------------------------------------------------------------------------------------------------------------------------------------------------------------------------------------------------------------------------------------------------------------------------------------------------------------------------------------------------------------------------------------------------------------------------------------------------------------------------------------------------------------------------------------------------------------------------------------------------------------------------------------------------------------------------------------------------------------------------------------------------------------------------------------------------------------------------------------------------------------------------------------------------------------------------------------------------------------------------------------------------------------------------------------------------------------------------------------------------------------------------------------------------------------------------------------------------------------------------------------------------------------------------------------------------------------------------------------------------------------------------------------------------------|

|  |  |  |  |  |  |                                                                                                                                                                                                                                                                                                                                                                                                                                                                                                                                                                                                                                                                                                                                                                                                                                                                                                                                                                                                                                                                                                                                                                                                                                                                                       |
|--|--|--|--|--|--|---------------------------------------------------------------------------------------------------------------------------------------------------------------------------------------------------------------------------------------------------------------------------------------------------------------------------------------------------------------------------------------------------------------------------------------------------------------------------------------------------------------------------------------------------------------------------------------------------------------------------------------------------------------------------------------------------------------------------------------------------------------------------------------------------------------------------------------------------------------------------------------------------------------------------------------------------------------------------------------------------------------------------------------------------------------------------------------------------------------------------------------------------------------------------------------------------------------------------------------------------------------------------------------|
|  |  |  |  |  |  | UR1:C5_03530C_A:C5_03550W_A:C5_03670C_A:FGR27:C5_03920C_A:C5_03970W_A:URA7:CSU57:C5_04610W_A:HAS1:C5_04990W_A:C5_05340W_A:NOP5:FET31:C6_00530C_A:C6_00640C_A:HAL21:C6_01040C_A:RCN1:CIC1:ACF2:C6_01890C_A:C6_01980C_A:C6_02230W_A:C6_02350C_A:NIP7:MRT4:POP4:EMF1:C6_03210C_A:BMT4:C6_03390W_A:FGR17:ALS5:SBA1:SHM2:SNQ2:SPB1:C6_04530C_A:C7_00160C_A:C7_00330C_A:C7_00380W_A:C7_00490C_A:RPA135:NOP15:C7_01030C_A:DBP7:GCN3:C7_01360C_A:FLU1:C7_02100W_A:C7_02340C_A:C7_02460C_A:C7_02930C_A:ZCF29:CPY1:ISY1:ENP2:C7_03990C_A:C7_04140C_A:UTP18:MIS12:CR_00460C_A:CR_00670C_A:BUD22:BMT3:PWP2:TRM1:CAB3:CR_01410C_A:CR_01700C_A:CR_01780W_A:CR_01950W_A:CR_02030C_A:CR_02420W_A:CR_02430C_A:RPC19:DBP2:RPC31:CR_02890C_A:SRP40:CR_03110W_A:CR_03230W_A:CR_03360W_A:KTI12:NCS2:YVH1:IFF3:PRP42:CR_03940W_A:GCD1:MEX67:CR_04110W_A:CR_04160C_A:CR_04170W_A:CR_04240C_A:CR_04300W_A:NHP2:ADE6:RPB8:CR_04920W_A:NOC2:CR_05550C_A:RNR3:MTG2:DBP8:VPS75:SFL1:RPL7:FGR50:CR_06680C_A:NMD3:CR_06840W_A:CR_06980W_A:CR_07030C_A:CR_07080W_A:CR_07470W_A:CR_07640C_A:DBP6:IMP4:CR_08000C_A:NOP10:SSB1:RIO2:CR_08130W_A:TRM9:HSP104:ATS1:CR_08330W_A:CYS3:GSH2:TSR1:PRP8:CR_08940W_A:CR_09110C_A:ELF1:SSF1:CR_09800C_A:SIK1:UTP5:AHA1:CR_10400W_A:CR_10410C_A:CR_10430C_A:CR_10470C_A:DRS1:POP3 |
|--|--|--|--|--|--|---------------------------------------------------------------------------------------------------------------------------------------------------------------------------------------------------------------------------------------------------------------------------------------------------------------------------------------------------------------------------------------------------------------------------------------------------------------------------------------------------------------------------------------------------------------------------------------------------------------------------------------------------------------------------------------------------------------------------------------------------------------------------------------------------------------------------------------------------------------------------------------------------------------------------------------------------------------------------------------------------------------------------------------------------------------------------------------------------------------------------------------------------------------------------------------------------------------------------------------------------------------------------------------|

|       |                                        |                             |                                          |          |       |                                                                                                                                                                                                                                                                                                                                                                                                                                                                                                                                                                                                                                                                                                                                                                                                                                                                                                                                                                                                                                                                                                                                                                                                                                                                                                                                                                                                                                                                                                                                                                                                                                                                                                                                                                                                                                                                                                                                                                                                                                                                                                                                                                                                                                                                                                                                                                                                                                                                                                                                                                                                                                                                         |
|-------|----------------------------------------|-----------------------------|------------------------------------------|----------|-------|-------------------------------------------------------------------------------------------------------------------------------------------------------------------------------------------------------------------------------------------------------------------------------------------------------------------------------------------------------------------------------------------------------------------------------------------------------------------------------------------------------------------------------------------------------------------------------------------------------------------------------------------------------------------------------------------------------------------------------------------------------------------------------------------------------------------------------------------------------------------------------------------------------------------------------------------------------------------------------------------------------------------------------------------------------------------------------------------------------------------------------------------------------------------------------------------------------------------------------------------------------------------------------------------------------------------------------------------------------------------------------------------------------------------------------------------------------------------------------------------------------------------------------------------------------------------------------------------------------------------------------------------------------------------------------------------------------------------------------------------------------------------------------------------------------------------------------------------------------------------------------------------------------------------------------------------------------------------------------------------------------------------------------------------------------------------------------------------------------------------------------------------------------------------------------------------------------------------------------------------------------------------------------------------------------------------------------------------------------------------------------------------------------------------------------------------------------------------------------------------------------------------------------------------------------------------------------------------------------------------------------------------------------------------------|
| 2E+06 | organic substance biosynthetic process | 451 out of 804 genes, 56.1% | 2571 out of 6473 background genes, 39.7% | 1.20E-20 | 0.00% | RIM8:PHR2:HBR1:C1_00510W_A:CNS1:RRS1:HMT1:C1_01150C_A:C1_01160C_A:C1_01470W_A:C1_01530C_A:C1_01900C_A:C1_02090C_A:ABP140:C1_02310C_A:C1_02430C_A:C1_02450C_A:HOM6:PDE2:MIA40:TSR2:RPL6:ARO80:MAS1:C1_03370W_A:EHT1:C1_03790C_A:C1_03830C_A:C1_04040C_A:C1_04120C_A:ERB1:NOP4:C1_04990C_A:RHD1:RRP6:C1_05220C_A:C1_05230W_A:C1_05360C_A:RPS27A:RIB4:C1_05630C_A:FAL1:C1_05650W_A:C1_06540C_A:NOP6:C1_06760C_A:C1_06770W_A:MRPL19:C1_06800W_A:SUI2:C1_07090C_A:RIA1:YMC1:YPD1:PEX3:LHP1:C1_07510W_A:C1_07570C_A:ADE4:GCS1:ADE5,7:C1_07950C_A:FUN12:DRG1:GCD6:C1_08630W_A:MSS116:C1_09390W_A:GUA1:C1_09610W_A:C1_09710C_A:DBP3:TPK1:C1_10340W_A:C1_10620W_A:C1_10970W_A:C1_11000C_A:C1_11370C_A:KRR1:C1_11560C_A:C1_11900C_A:C1_11910W_A:CSI2:C1_12350W_A:C1_12440W_A:C1_12570C_A:CHR1:C1_12670C_A:C1_12760W_A:C1_13260W_A:C1_13270W_A:C1_13330C_A:HSP70:C1_14080W_A:FTR1:MPP10:FAV3:NDT80:HMA1:C2_00220C_A:C2_00280C_A:C2_00410C_A:C2_00880W_A:MXR1:C2_01070W_A:C2_01510C_A:C2_01870C_A:C2_02420C_A:PRS1:C2_02540W_A:SER2:C2_02710C_A:HPT1:LIG4:ADE8:PRP3:C2_03360W_A:MNN42:SCH9:GCD7:C2_04120C_A:BAT21:C2_04570W_A:SNU114:C2_04820W_A:CRK1:C2_05080C_A:MAK5:ERF1:C2_05160C_A:RPF2:RPC40:C2_05520W_A:KTI11:TES1:LAS1:CNT:ECM17:IMH3:RTA2:C2_06480W_A:RPL11:C2_06850W_A:SPE3:RPA12:NOC4:C2_07360W_A:SSC1:C2_07410W_A:RCL1:RNR22:C2_07610C_A:PRS5:C2_07920W_A:NSA1:ORF298:RRP8:TIF4631:C2_08840W_A:SLP2:PES1:RRP15:C2_09500W_A:C2_09660W_A:LEU42:FCY21:CWC22:OCA1:GPD1:PUS7:MTR2:TIF11:C2_10740C_A:RPC11:C2_10810W_A:C3_00100W_A:UTP8:BUD21:SOF1:C3_00950C_A:BMS1:URA3:C3_01520C_A:C3_01560W_A:C3_02020W_A:C3_02030W_A:C3_02040C_A:UTP4:C3_02180C_A:C3_02350W_A:PHA2:C3_03070W_A:C3_03330C_A:HBR3:SAP9:URK1:C3_04370C_A:C3_04380C_A:ADE2:MAK21:RPP2B:SFP1:CEM1:C3_05140C_A:C3_05160C_A:SAP3:C3_05380W_A:QDR2:C3_05800W_A:C3_05860C_A:CTA4:NOG1:ELP3:DED1:C3_06150W_A:C3_06370C_A:NSA2:PRP5:C3_06760W_A:C3_06830C_A:NOP13:C3_07400W_A:C3_07480W_A:C3_07550C_A:RIT1:C3_07670W_A:UTP9:DUR4:C4_00490W_A:RLP24:NMD5:C4_00690C_A:C4_00810C_A:C4_00940W_A:MDN1:DAG7:RAT1:C4_01280C_A:PWP1:NIP1:C4_01670C_A:TOA2:HGHI:C4_02850W_A:ZUO1:C4_02880C_A:C4_03040W_A:C4_03150W_A:C4_03720C_A:C4_03730C_A:C4_03740W_A:C4_03830W_A:RRP42:RAM1:C4_04090C_A:ECM1:C4_04510W_A:SSZ1:C4_04720W_A:C4_04810C_A:AGP3:NBP35:C4_05260W_A:C4_05650W_A:C4_06210C_A:C4_06410W_A:MNN4:NOP1:C4_06790W_A:MNN46:MET16:YDC1:C4_07060W_A:C4_07100C_A:C4_07140W_A:VIP1:C5_00260W_A:C5_00280C_A:DU4:RMT2:URA4:C5_00920W_A:C5_00950C_A:BUD23:PUS4:C5_01430C_A:FYV5:SPB4:C5_01610W_A:MAS2:GIS2:C5_01930W_A:RIB2:C5_02010C_A:C5_02070C_A:RIX7:GCD11:TIF5:UTP13:C5_02730C_A:C5_03010W_A:RMS1:RPO26:FUR1:C5_03530C_A: |
|-------|----------------------------------------|-----------------------------|------------------------------------------|----------|-------|-------------------------------------------------------------------------------------------------------------------------------------------------------------------------------------------------------------------------------------------------------------------------------------------------------------------------------------------------------------------------------------------------------------------------------------------------------------------------------------------------------------------------------------------------------------------------------------------------------------------------------------------------------------------------------------------------------------------------------------------------------------------------------------------------------------------------------------------------------------------------------------------------------------------------------------------------------------------------------------------------------------------------------------------------------------------------------------------------------------------------------------------------------------------------------------------------------------------------------------------------------------------------------------------------------------------------------------------------------------------------------------------------------------------------------------------------------------------------------------------------------------------------------------------------------------------------------------------------------------------------------------------------------------------------------------------------------------------------------------------------------------------------------------------------------------------------------------------------------------------------------------------------------------------------------------------------------------------------------------------------------------------------------------------------------------------------------------------------------------------------------------------------------------------------------------------------------------------------------------------------------------------------------------------------------------------------------------------------------------------------------------------------------------------------------------------------------------------------------------------------------------------------------------------------------------------------------------------------------------------------------------------------------------------------|



|  |  |  |  |  |  |                                                                                                                                                                                                                                                                                                                                                                                                                                                                                                                                                                                                                                                                                                                                                                                                                                                                                                                                                                                                                                                                                                                                                                                                                                                                                                                                                  |
|--|--|--|--|--|--|--------------------------------------------------------------------------------------------------------------------------------------------------------------------------------------------------------------------------------------------------------------------------------------------------------------------------------------------------------------------------------------------------------------------------------------------------------------------------------------------------------------------------------------------------------------------------------------------------------------------------------------------------------------------------------------------------------------------------------------------------------------------------------------------------------------------------------------------------------------------------------------------------------------------------------------------------------------------------------------------------------------------------------------------------------------------------------------------------------------------------------------------------------------------------------------------------------------------------------------------------------------------------------------------------------------------------------------------------|
|  |  |  |  |  |  | A:C5_03550W_A:C5_03670C_A:FGR27:C5_03920C_A:C5_03970W_A:URA7:CSU57:<br>C5_04610W_A:HAS1:C5_04990W_A:C5_05340W_A:NOP5:FET31:C6_00530C_A:C6_<br>00640C_A:HAL21:C6_01040C_A:RCN1:CIC1:ACF2:C6_01890C_A:C6_01980C_A:C6_0<br>2230W_A:C6_02350C_A:NIP7:MRT4:POP4:EMF1:C6_03210C_A:BMT4:C6_03390W_<br>A:FGR17:ALS5:SBA1:SHM2:SNQ2:SPB1:C6_04530C_A:C7_00160C_A:C7_00330C_A:<br>C7_00380W_A:C7_00490C_A:RPA135:NOP15:C7_01030C_A:DBP7:GCN3:C7_01360<br>C_A:FLU1:C7_02100W_A:C7_02340C_A:C7_02460C_A:C7_02930C_A:ZCF29:CPY1:IS<br>Y1:ENP2:C7_03990C_A:C7_04140C_A:UTP18:MIS12:CR_00460C_A:CR_00670C_A:B<br>UD22:BMT3:PWP2:TRM1:CAB3:CR_01410C_A:CR_01700C_A:CR_01780W_A:CR_01<br>950W_A:CR_02030C_A:CR_02420W_A:CR_02430C_A:RPC19:DBP2:RPC31:CR_0289<br>0C_A:SRP40:CR_03110W_A:CR_03230W_A:CR_03360W_A:KTI12:NCS2:YVH1:IFF3:P<br>RP42:CR_03940W_A:GCD1:MEX67:CR_04110W_A:CR_04160C_A:CR_04170W_A:CR_<br>_04240C_A:CR_04300W_A:NHP2:ADE6:RPB8:CR_04920W_A:NOC2:CR_05550C_A:R<br>NR3:MTG2:DBP8:VPS75:SFL1:RPL7:FGR50:CR_06680C_A:NMD3:CR_06840W_A:CR_<br>06980W_A:CR_07030C_A:CR_07080W_A:CR_07470W_A:CR_07640C_A:DBP6:IMP4<br>:CR_08000C_A:NOP10:SSB1:RIO2:CR_08130W_A:TRM9:HSP104:ATS1:CR_08330W_<br>A:CYS3:GSH2:TSR1:PRP8:CR_08940W_A:CR_09110C_A:ELF1:SSF1:CR_09800C_A:SIK<br>1:UTP5:AHA1:CR_10400W_A:CR_10410C_A:CR_10430C_A:CR_10470C_A:DRS1:POP<br>3 |
|--|--|--|--|--|--|--------------------------------------------------------------------------------------------------------------------------------------------------------------------------------------------------------------------------------------------------------------------------------------------------------------------------------------------------------------------------------------------------------------------------------------------------------------------------------------------------------------------------------------------------------------------------------------------------------------------------------------------------------------------------------------------------------------------------------------------------------------------------------------------------------------------------------------------------------------------------------------------------------------------------------------------------------------------------------------------------------------------------------------------------------------------------------------------------------------------------------------------------------------------------------------------------------------------------------------------------------------------------------------------------------------------------------------------------|

|      |                              |                                 |                                                    |          |       |                                                                                                                                                                                                                                                                                                                                                                                                                                                                                                                                                                                                                                                                                                               |
|------|------------------------------|---------------------------------|----------------------------------------------------|----------|-------|---------------------------------------------------------------------------------------------------------------------------------------------------------------------------------------------------------------------------------------------------------------------------------------------------------------------------------------------------------------------------------------------------------------------------------------------------------------------------------------------------------------------------------------------------------------------------------------------------------------------------------------------------------------------------------------------------------------|
| 6399 | tRNA<br>metabolic<br>process | 72 out of<br>804 genes,<br>9.0% | 168 out of<br>6473<br>background<br>genes,<br>2.6% | 1.83E-20 | 0.00% | C1_01150C_A:C1_01160C_A:C1_01530C_A:ABP140:C1_03830C_A:RRP6:C1_05230W_A:C1_05360C_A:C1_06540C_A:LHP1:C1_09390W_A:C1_12350W_A:C1_12570C_A:HMA1:C2_01510C_A:C2_02420C_A:RPC40:KTI11:C2_06480W_A:C2_07360W_A:C2_08840W_A:C2_09500W_A:PUS7:RPC11:C3_05140C_A:C3_05800W_A:ELP3:C3_07400W_A:RIT1:C4_00810C_A:C4_00940W_A:C4_02850W_A:C4_03040W_A:C4_03730C_A:C4_03740W_A:C4_03830W_A:RRP42:C4_04810C_A:NBP35:C4_05260W_A:NOP1:C4_07060W_A:DUS4:PUS4:C5_01610W_A:RIB2:C5_02730C_A:RPO26:C5_04990W_A:C6_02350C_A:POP4:C6_03210C_A:C6_04530C_A:C7_00330C_A:C7_02340C_A:C7_03990C_A:CR_00670C_A:TRM1:RPC19:RPC31:CR_02890C_A:CR_03110W_A:KTI12:NCS2:CR_04160C_A:CR_04300W_A:RPB8:CR_05550C_A:TRM9:ATS1:CR_08940W_A:POP3 |
|------|------------------------------|---------------------------------|----------------------------------------------------|----------|-------|---------------------------------------------------------------------------------------------------------------------------------------------------------------------------------------------------------------------------------------------------------------------------------------------------------------------------------------------------------------------------------------------------------------------------------------------------------------------------------------------------------------------------------------------------------------------------------------------------------------------------------------------------------------------------------------------------------------|

|      |                          |                                 |                                                    |          |       |                                                                                                                                                                                                                                                                                                                                                                                                                                                                     |
|------|--------------------------|---------------------------------|----------------------------------------------------|----------|-------|---------------------------------------------------------------------------------------------------------------------------------------------------------------------------------------------------------------------------------------------------------------------------------------------------------------------------------------------------------------------------------------------------------------------------------------------------------------------|
| 6400 | tRNA<br>modificat<br>ion | 44 out of<br>804 genes,<br>5.5% | 71 out of<br>6473<br>backgroun<br>d genes,<br>1.1% | 7.09E-20 | 0.00% | C1_01150C_A:ABP140:C1_05360C_A:C1_09390W_A:C1_12570C_A:HMA1:C2_0151<br>0C_A:C2_02420C_A:KTI11:C2_06480W_A:C2_08840W_A:C2_09500W_A:PUS7:C3_<br>05140C_A:ELP3:C3_07400W_A:RIT1:C4_00810C_A:C4_00940W_A:C4_02850W_A:C<br>4_03730C_A:C4_03830W_A:C4_04810C_A:NBP35:C4_05260W_A:DUS4:PUS4:C5_0<br>1610W_A:RIB2:C5_02730C_A:C6_02350C_A:C6_04530C_A:C7_00330C_A:C7_0234<br>0C_A:C7_03990C_A:CR_00670C_A:TRM1:KTI12:NCS2:CR_04160C_A:CR_04300W_A<br>:TRM9:ATS1:CR_08940W_A |
|------|--------------------------|---------------------------------|----------------------------------------------------|----------|-------|---------------------------------------------------------------------------------------------------------------------------------------------------------------------------------------------------------------------------------------------------------------------------------------------------------------------------------------------------------------------------------------------------------------------------------------------------------------------|

|       |                                         |                           |                                        |          |       |                                                                                                                                                                                                                                                                                                                                                                                                                                                                                                                                                                                                                                      |
|-------|-----------------------------------------|---------------------------|----------------------------------------|----------|-------|--------------------------------------------------------------------------------------------------------------------------------------------------------------------------------------------------------------------------------------------------------------------------------------------------------------------------------------------------------------------------------------------------------------------------------------------------------------------------------------------------------------------------------------------------------------------------------------------------------------------------------------|
| 1E+05 | non-membrane-bounded organelle assembly | 74 out of 804 genes, 9.2% | 180 out of 6473 background genes, 2.8% | 9.33E-20 | 0.00% | RRS1:RPL6:C1_04040C_A:ERB1:NOP4:RRP6:C1_05360C_A:RPS27A:C1_06760C_A:RIA1:FUN12:JIP5:C1_09710C_A:C1_10970W_A:CSI2:C1_12440W_A:C1_12760W_A:C1_14080W_A:C2_01070W_A:C2_02540W_A:C2_02710C_A:MAK5:C2_05160C_A:RPF2:RPL11:TIF4631:C2_10740C_A:BMS1:C3_01560W_A:C3_02020W_A:C3_02040C_A:C3_02350W_A:C3_04370C_A:MAK21:C3_05160C_A:QDR2:C3_06370C_A:MDN1:C4_02880C_A:C4_05010W_A:RMT2:SPB4:C5_02070C_A:TIF5:HAS1:C5_05340W_A:CIC1:C6_02230W_A:NIP7:MOB1:SPB1:RPA135:DBP7:FLU1:ENP2:UTP18:BUD22:PWP2:CR_01410C_A:YVH1:SGD1:CR_03940W_A:CR_04170W_A:NOC2:CR_05550C_A:SDA1:CR_06680C_A:CR_07080W_A:TSR1:ELF1:SSF1:CR_09800C_A:CR_10470C_A:DRS1 |
|-------|-----------------------------------------|---------------------------|----------------------------------------|----------|-------|--------------------------------------------------------------------------------------------------------------------------------------------------------------------------------------------------------------------------------------------------------------------------------------------------------------------------------------------------------------------------------------------------------------------------------------------------------------------------------------------------------------------------------------------------------------------------------------------------------------------------------------|

|      |                 |                           |                                       |          |       |                                                                                                                                                                                                                                                                                                                                                                                                                                                                                        |
|------|-----------------|---------------------------|---------------------------------------|----------|-------|----------------------------------------------------------------------------------------------------------------------------------------------------------------------------------------------------------------------------------------------------------------------------------------------------------------------------------------------------------------------------------------------------------------------------------------------------------------------------------------|
| 8033 | tRNA processing | 50 out of 804 genes, 6.2% | 99 out of 6473 background genes, 1.5% | 2.22E-17 | 0.00% | C1_01150C_A:ABP140:C1_05360C_A:LHP1:C1_09390W_A:C1_12570C_A:HMA1:C2_01510C_A:C2_02420C_A:KTI11:C2_06480W_A:C2_07360W_A:C2_08840W_A:C2_09500W_A:PUS7:C3_05140C_A:C3_05800W_A:ELP3:C3_07400W_A:RIT1:C4_00810C_A:C4_00940W_A:C4_02850W_A:C4_03730C_A:C4_03830W_A:C4_04810C_A:NP35:C4_05260W_A:NOP1:DUS4:PUS4:C5_01610W_A:RIB2:C5_02730C_A:C6_02350C_A:POP4:C6_04530C_A:C7_00330C_A:C7_02340C_A:C7_03990C_A:CR_00670C_A:TRM1:KTI12:NCS2:CR_04160C_A:CR_04300W_A:TRM9:ATS1:CR_08940W_A:POP3 |
|------|-----------------|---------------------------|---------------------------------------|----------|-------|----------------------------------------------------------------------------------------------------------------------------------------------------------------------------------------------------------------------------------------------------------------------------------------------------------------------------------------------------------------------------------------------------------------------------------------------------------------------------------------|

|       |                    |                           |                                        |          |       |                                                                                                                                                                                                                                                                                                                                                                                                                                                                                                                                                                                                                                            |
|-------|--------------------|---------------------------|----------------------------------------|----------|-------|--------------------------------------------------------------------------------------------------------------------------------------------------------------------------------------------------------------------------------------------------------------------------------------------------------------------------------------------------------------------------------------------------------------------------------------------------------------------------------------------------------------------------------------------------------------------------------------------------------------------------------------------|
| 70925 | organelle assembly | 75 out of 804 genes, 9.3% | 203 out of 6473 background genes, 3.1% | 9.62E-17 | 0.00% | RRS1:ATG17:RPL6:C1_04040C_A:ERB1:NOP4:RRP6:C1_05360C_A:RPS27A:C1_06760C_A:RIA1:FUN12:JIP5:C1_09710C_A:C1_10970W_A:CSI2:C1_12440W_A:C1_12760W_A:C1_14080W_A:C2_01070W_A:C2_02540W_A:C2_02710C_A:MAK5:C2_05160C_A:RPF2:RPL11:TIF4631:C2_10740C_A:BMS1:C3_01560W_A:C3_02020W_A:C3_02040C_A:C3_02350W_A:C3_04370C_A:MAK21:C3_05160C_A:QDR2:C3_06370C_A:MDN1:C4_02880C_A:C4_05010W_A:RMT2:SPB4:C5_02070C_A:TIF5:HAS1:C5_05340W_A:CIC1:C6_02230W_A:NIP7:MOB1:SPB1:RPA135:DBP7:FLU1:ENP2:UTP18:BUD22:PWP2:CR_01410C_A:YVH1:SGD1:CR_03940W_A:CR_04170W_A:NOC2:CR_05550C_A:SDA1:CR_06680C_A:CR_07080W_A:TSR1:ELF1:SSF1:CR_09800C_A:CR_10470C_A:DRS1 |
|-------|--------------------|---------------------------|----------------------------------------|----------|-------|--------------------------------------------------------------------------------------------------------------------------------------------------------------------------------------------------------------------------------------------------------------------------------------------------------------------------------------------------------------------------------------------------------------------------------------------------------------------------------------------------------------------------------------------------------------------------------------------------------------------------------------------|

|     |                                   |                                 |                                                     |          |       |                                                                                                                                                                                                                                                                                                                                                                                                                                                                                                                        |
|-----|-----------------------------------|---------------------------------|-----------------------------------------------------|----------|-------|------------------------------------------------------------------------------------------------------------------------------------------------------------------------------------------------------------------------------------------------------------------------------------------------------------------------------------------------------------------------------------------------------------------------------------------------------------------------------------------------------------------------|
| 460 | maturati<br>on of<br>5.8S<br>rRNA | 60 out of<br>804 genes,<br>7.5% | 144 out of<br>6473<br>backgroun<br>d genes,<br>2.2% | 6.13E-16 | 0.00% | RRS1:C1_01160C_A:C1_03830C_A:C1_04040C_A:RRP6:C1_06540C_A:C1_06800W_A:C1_07090C_A:C1_09710C_A:DBP3:KRR1:CSI2:C1_12350W_A:CHR1:C1_14080W_A:MPP10:FAV3:C2_00410C_A:C2_02540W_A:MAK5:RPF2:LAS1:NOC4:RCL1:RRP15:BUD21:C3_01560W_A:C3_02020W_A:C3_02040C_A:C3_02350W_A:C3_05160C_A:C3_06370C_A:NSA2:DUR4:C4_00490W_A:C4_00690C_A:RAT1:C4_03740W_A:RRP42:BUD23:C5_02070C_A:UTP13:C5_03920C_A:NOP5:CIC1:ALS5:SPB1:UTP18:PWP2:CR_02420W_A:CR_03360W_A:DBP8:RPL7:CR_07080W_A:DBP6:ATS1:CR_08330W_A:PRP8:CR_09800C_A:CR_10410C_A |
|-----|-----------------------------------|---------------------------------|-----------------------------------------------------|----------|-------|------------------------------------------------------------------------------------------------------------------------------------------------------------------------------------------------------------------------------------------------------------------------------------------------------------------------------------------------------------------------------------------------------------------------------------------------------------------------------------------------------------------------|

|      |                                                                                                                                       |                                 |                                                     |          |       |                                                                                                                                                                                                                                                                                                                                                                                                                                                                                                                        |
|------|---------------------------------------------------------------------------------------------------------------------------------------|---------------------------------|-----------------------------------------------------|----------|-------|------------------------------------------------------------------------------------------------------------------------------------------------------------------------------------------------------------------------------------------------------------------------------------------------------------------------------------------------------------------------------------------------------------------------------------------------------------------------------------------------------------------------|
| 466  | maturati<br>on of<br>5.8S<br>rRNA<br>from<br>tricistroni<br>c rRNA<br>transcrip<br>t (SSU-<br>rRNA,<br>5.8S<br>rRNA,<br>LSU-<br>rRNA) | 60 out of<br>804 genes,<br>7.5% | 144 out of<br>6473<br>backgroun<br>d genes,<br>2.2% | 6.13E-16 | 0.00% | RRS1:C1_01160C_A:C1_03830C_A:C1_04040C_A:RRP6:C1_06540C_A:C1_06800W_A:C1_07090C_A:C1_09710C_A:DBP3:KRR1:CSI2:C1_12350W_A:CHR1:C1_14080W_A:MPP10:FAV3:C2_00410C_A:C2_02540W_A:MAK5:RPF2:LAS1:NOC4:RCL1:RRP15:BUD21:C3_01560W_A:C3_02020W_A:C3_02040C_A:C3_02350W_A:C3_05160C_A:C3_06370C_A:NSA2:DUR4:C4_00490W_A:C4_00690C_A:RAT1:C4_03740W_A:RRP42:BUD23:C5_02070C_A:UTP13:C5_03920C_A:NOP5:CIC1:ALS5:SPB1:UTP18:PWP2:CR_02420W_A:CR_03360W_A:DBP8:RPL7:CR_07080W_A:DBP6:ATS1:CR_08330W_A:PRP8:CR_09800C_A:CR_10410C_A |
| 1510 | RNA<br>methylation                                                                                                                    | 26 out of<br>804 genes,<br>3.2% | 35 out of<br>6473<br>backgroun<br>d genes,<br>0.5%  | 6.27E-14 | 0.00% | C1_01150C_A:ABP140:C2_06480W_A:C2_07360W_A:RRP8:C2_08840W_A:C3_05140C_A:C3_05860C_A:C3_07400W_A:C4_03730C_A:C4_03830W_A:C4_04810C_A:NOP1:BUD23:SPB1:C6_04530C_A:C7_02340C_A:CR_00670C_A:TRM1:CR_01780W_A:CR_02030C_A:CR_04160C_A:CR_04170W_A:CR_04300W_A:TRM9:CR_08940W_A                                                                                                                                                                                                                                              |



|       |                                  |                             |                                          |          |       |                                                                                                                                                                                                                                                                                                                                                                                                                                                                                                                                                                                                                                                                                                                                                                                                                                                                                                                                                                                                                                                                                                                                                                                                                                                                                                                                                                                                                                                                                                                                                                                                                                                                                                                                                                                                                                                                                                                                                                                                                                                                                                                                                                                                                                                                                                                                                                                                                                                                                                                                                                                                                                                               |
|-------|----------------------------------|-----------------------------|------------------------------------------|----------|-------|---------------------------------------------------------------------------------------------------------------------------------------------------------------------------------------------------------------------------------------------------------------------------------------------------------------------------------------------------------------------------------------------------------------------------------------------------------------------------------------------------------------------------------------------------------------------------------------------------------------------------------------------------------------------------------------------------------------------------------------------------------------------------------------------------------------------------------------------------------------------------------------------------------------------------------------------------------------------------------------------------------------------------------------------------------------------------------------------------------------------------------------------------------------------------------------------------------------------------------------------------------------------------------------------------------------------------------------------------------------------------------------------------------------------------------------------------------------------------------------------------------------------------------------------------------------------------------------------------------------------------------------------------------------------------------------------------------------------------------------------------------------------------------------------------------------------------------------------------------------------------------------------------------------------------------------------------------------------------------------------------------------------------------------------------------------------------------------------------------------------------------------------------------------------------------------------------------------------------------------------------------------------------------------------------------------------------------------------------------------------------------------------------------------------------------------------------------------------------------------------------------------------------------------------------------------------------------------------------------------------------------------------------------------|
| 43170 | macromolecular metabolic process | 507 out of 804 genes, 63.1% | 3194 out of 6473 background genes, 49.3% | 6.49E-14 | 0.00% | RIM8:PHR2:HBR1:CNS1:RRS1:NMA111:HMT1:C1_01130W_A:C1_01150C_A:C1_01160C_A:C1_01470W_A:C1_01530C_A:C1_01900C_A:C1_02090C_A:ABP140:C1_02310C_A:C1_02430C_A:C1_02440C_A:C1_02450C_A:HOM6:PDE2:MIA40:ATG17:TSR2:RPL6:ARO80:MAS1:C1_03370W_A:C1_03430W_A:C1_03790C_A:C1_03830C_A:C1_04040C_A:C1_04120C_A:ERB1:RPN4:NOP4:C1_04990C_A:RHD1:RRP6:C1_05220C_A:C1_05230W_A:C1_05360C_A:RPS27A:RIB4:C1_05630C_A:FAL1:C1_05650W_A:NPL4:C1_06120C_A:C1_06540C_A:NOP6:C1_06760C_A:C1_06770W_A:MRPL19:C1_06800W_A:CAT1:C1_06910C_A:SUI2:C1_07090C_A:RIA1:YPD1:RME1:C1_07390W_A:PEX3:LHP1:C1_07510W_A:C1_07570C_A:GCS1:C1_07950C_A:FUN12:DRG1:GCD6:C1_08630W_A:MSS116:C1_09390W_A:C1_09610W_A:C1_09710C_A:DBP3:TPK1:C1_10340W_A:C1_10410W_A:C1_10620W_A:C1_10970W_A:C1_11000C_A:C1_11370C_A:KRR1:GAR1:C1_11560C_A:GAD1:C1_11900C_A:C1_11910W_A:CSI2:C1_12350W_A:PKH2:C1_12440W_A:C1_12570C_A:CHR1:C1_12670C_A:C1_12760W_A:C1_13260W_A:C1_13270W_A:KNS1:HSP70:MODF:C1_14080W_A:FTR1:C1_14160W_A:SAM35:MPP10:FAV3:NDT80:HMA1:C2_00220C_A:C2_00280C_A:C2_00410C_A:C2_00620C_A:C2_00880W_A:MXR1:C2_01060C_A:C2_01070W_A:CLB2:C2_01510C_A:C2_01870C_A:ZCF6:C2_02420C_A:PRS1:C2_02540W_A:C2_02710C_A:C2_02960C_A:LIG4:C2_03130W_A:PRP3:C2_03550C_A:MNN42:C2_03700W_A:C2_03830W_A:C2_03910C_A:SCH9:GCD7:C2_04120C_A:BAT21:C2_04570W_A:SNU114:C2_04820W_A:CRK1:C2_05080C_A:MAK5:ERF1:PEX2:C2_05160C_A:RPF2:RPC40:PEX6:C2_05520W_A:KTI11:PNG2:TES1:LAS1:CNT:ECM17:RTA2:C2_06480W_A:RPL11:C2_06850W_A:C2_06890C_A:SPE3:C2_07070W_A:RCK2:C2_07140W_A:RPA12:NOC4:C2_07360W_A:SSC1:RCL1:RNR22:C2_07610C_A:PRS5:C2_07920W_A:NSA1:C2_08200W_A:ORF298:RRP8:C2_08620W_A:TIF4631:RPT6:SPO11:C2_08840W_A:FPK1:SLP2:GLO2:PEP5:RRP15:C2_09500W_A:C2_09660W_A:C2_09930W_A:FCY21:YOR1:CWC22:OCA1:PUS7:MTR2:TIF11:C2_10740C_A:RPC11:C2_10810W_A:C3_00100W_A:UTP8:BUD21:SOF1:MIH1:C3_00950C_A:BMS1:C3_01520C_A:C3_01560W_A:C3_02020W_A:C3_02030W_A:C3_02040C_A:UTP4:C3_02180C_A:C3_02350W_A:C3_03070W_A:C3_03330C_A:ULP1:HBR3:SAP9:URK1:C3_04370C_A:C3_04380C_A:MAK21:RPP2B:SFP1:CEM1:C3_05140C_A:C3_05160C_A:WOR2:SAP3:C3_05380W_A:C3_05510W_A:QDR2:C3_05790C_A:C3_05800W_A:C3_05860C_A:CTA4:NOG1:ELP3:DED1:C3_06150W_A:CYM1:HNT2:C3_06370C_A:NSA2:PRP5:C3_06760W_A:C3_06830C_A:C3_06860C_A:C3_06940W_A:NOP13:C3_07380W_A:C3_07400W_A:C3_07480W_A:C3_07550C_A:RIT1:UTP9:DUR4:C4_00490W_A:RLP24:NMD5:C4_00690C_A:C4_00700C_A:C4_00810C_A:C4_00940W_A:MDN1:DAG7:RAT1:C4_01280C_A:PWP1:C4_01470W_A:NIP1:C4_01670C_A:TOA2:HGH1:HOS3:C4_02850W_A:ZUO1:C4_02880C_A:C4_03040W_A:C4_03050C_A:C4_03150W_A:C4_03720C_A:C4_03730C_A:C4_03740W_A:C4_03830W_A:RRP42:RAM1:C4_04090C_A:ECM1:SAP10:C4_04500C_A:C4_0451 |
|-------|----------------------------------|-----------------------------|------------------------------------------|----------|-------|---------------------------------------------------------------------------------------------------------------------------------------------------------------------------------------------------------------------------------------------------------------------------------------------------------------------------------------------------------------------------------------------------------------------------------------------------------------------------------------------------------------------------------------------------------------------------------------------------------------------------------------------------------------------------------------------------------------------------------------------------------------------------------------------------------------------------------------------------------------------------------------------------------------------------------------------------------------------------------------------------------------------------------------------------------------------------------------------------------------------------------------------------------------------------------------------------------------------------------------------------------------------------------------------------------------------------------------------------------------------------------------------------------------------------------------------------------------------------------------------------------------------------------------------------------------------------------------------------------------------------------------------------------------------------------------------------------------------------------------------------------------------------------------------------------------------------------------------------------------------------------------------------------------------------------------------------------------------------------------------------------------------------------------------------------------------------------------------------------------------------------------------------------------------------------------------------------------------------------------------------------------------------------------------------------------------------------------------------------------------------------------------------------------------------------------------------------------------------------------------------------------------------------------------------------------------------------------------------------------------------------------------------------------|

|  |  |  |  |  |  |                                                                                                                                                                                                                                                                                                                                                                                                                                                                                                                                                                                                                                                                                                                                                                                                                                                                                                                                                                                                                                                                                                                                                                                                                                                                                                                                                                                                                                                                                                                                                                                                                                                                                                                                                                                                                                       |
|--|--|--|--|--|--|---------------------------------------------------------------------------------------------------------------------------------------------------------------------------------------------------------------------------------------------------------------------------------------------------------------------------------------------------------------------------------------------------------------------------------------------------------------------------------------------------------------------------------------------------------------------------------------------------------------------------------------------------------------------------------------------------------------------------------------------------------------------------------------------------------------------------------------------------------------------------------------------------------------------------------------------------------------------------------------------------------------------------------------------------------------------------------------------------------------------------------------------------------------------------------------------------------------------------------------------------------------------------------------------------------------------------------------------------------------------------------------------------------------------------------------------------------------------------------------------------------------------------------------------------------------------------------------------------------------------------------------------------------------------------------------------------------------------------------------------------------------------------------------------------------------------------------------|
|  |  |  |  |  |  | OW_A:OMA1:SSZ1:C4_04720W_A:C4_04810C_A:AGP3:NBP35:C4_05260W_A:C4_05650W_A:C4_06210C_A:SOU1:C4_06410W_A:MNN4:NOP1:C4_06790W_A:MNN46:C4_07060W_A:C4_07100C_A:C4_07140W_A:C5_00280C_A:DUS4:RMT2:C5_00920W_A:C5_00950C_A:BUD23:PUS4:C5_01430C_A:FYV5:GLR1:SPB4:C5_01610W_A:MAS2:GIS2:C5_01930W_A:RIB2:C5_02010C_A:C5_02070C_A:RIX7:GCD11:TIF5:UTP13:C5_02730C_A:C5_03010W_A:RMS1:RPO26:FUR1:C5_03530C_A:C5_03550W_A:C5_03640W_A:C5_03670C_A:FGR27:C5_03700C_A:C5_03920C_A:C5_03970W_A:CSU57:C5_04610W_A:HAS1:C5_04990W_A:C5_05340W_A:PEX4:NOP5:FET31:C6_00530C_A:C6_00640C_A:C6_00760W_A:C6_01040C_A:RCN1:CIC1:ACF2:C6_01870C_A:C6_01890C_A:C6_01980C_A:C6_02230W_A:C6_02350C_A:NIP7:C6_02410W_A:MOB1:MRT4:POP4:EMF1:C6_03210C_A:BMT4:C6_03390W_A:FGR17:ALS5:SBA1:SHM2:SNQ2:SPB1:C6_04530C_A:C7_00160C_A:C7_00330C_A:C7_00380W_A:C7_00490C_A:RPA135:NOP15:C7_01030C_A:DBP7:GCN3:C7_01360C_A:FLU1:RAD14:C7_02100W_A:C7_02340C_A:C7_02460C_A:PEX1:C7_02930C_A:ZCF29:CPY1:ISY1:ENP2:C7_03990C_A:C7_04140C_A:UTP18:CR_00460C_A:PHO81:CR_00670C_A:BUD22:BMT3:PW2:TRM1:CAB3:CR_01410C_A:CR_01700C_A:CR_01780W_A:CR_01950W_A:CR_02030C_A:CR_02420W_A:CR_02430C_A:CR_02460W_A:RPC19:DBP2:RPC31:CR_02890C_A:AQY1:SRP40:CR_03110W_A:CR_03230W_A:CR_03360W_A:KTI12:NCS2:YVH1:IFF3:SGD1:PRP42:CR_03760W_A:CR_03940W_A:GCD1:MEX67:CR_04110W_A:CR_04160C_A:CR_04170W_A:CR_04240C_A:CR_04300W_A:NHP2:RPB8:CR_04920W_A:YCP4:NOC2:CR_05550C_A:RNR3:MTG2:DBP8:VPS75:SFL1:SOK1:RPL7:FGR50:CR_06680C_A:NMD3:CR_06840W_A:CR_06980W_A:CR_07030C_A:CR_07080W_A:CR_07470W_A:CR_07480W_A:CR_07640C_A:DBP6:IMP4:CR_08000C_A:NOP10:SSB1:RIO2:CR_08130W_A:TRM9:HSP104:ATS1:CR_08330W_A:GSH2:TSR1:PRP8:CR_08940W_A:CR_09110C_A:CR_09140C_A:CR_09310W_A:ELF1:SSF1:CR_09800C_A:SIK1:UGA3:CR_09990W_A:UTP5:AHA1:CR_10400W_A:CR_10410C_A:CR_10430C_A:CR_10470C_A:DRS1:POP3 |
|--|--|--|--|--|--|---------------------------------------------------------------------------------------------------------------------------------------------------------------------------------------------------------------------------------------------------------------------------------------------------------------------------------------------------------------------------------------------------------------------------------------------------------------------------------------------------------------------------------------------------------------------------------------------------------------------------------------------------------------------------------------------------------------------------------------------------------------------------------------------------------------------------------------------------------------------------------------------------------------------------------------------------------------------------------------------------------------------------------------------------------------------------------------------------------------------------------------------------------------------------------------------------------------------------------------------------------------------------------------------------------------------------------------------------------------------------------------------------------------------------------------------------------------------------------------------------------------------------------------------------------------------------------------------------------------------------------------------------------------------------------------------------------------------------------------------------------------------------------------------------------------------------------------|

|      |                                     |                             |                                          |          |       |                                                                                                                                                                                                                                                                                                                                                                                                                                                                                                                                                                                                                                                                                                                                                                                                                                                                                                                                                                                                                                                                                                                                                                                                                                                                                                                                                                                                                                                                                                                                                                                                                                                                                                                                                                                                                                                                                                                                                                                                                                                                                                                                                                                                                                                                                                                                                                                                                                                                                                                                                                                                                                                                       |
|------|-------------------------------------|-----------------------------|------------------------------------------|----------|-------|-----------------------------------------------------------------------------------------------------------------------------------------------------------------------------------------------------------------------------------------------------------------------------------------------------------------------------------------------------------------------------------------------------------------------------------------------------------------------------------------------------------------------------------------------------------------------------------------------------------------------------------------------------------------------------------------------------------------------------------------------------------------------------------------------------------------------------------------------------------------------------------------------------------------------------------------------------------------------------------------------------------------------------------------------------------------------------------------------------------------------------------------------------------------------------------------------------------------------------------------------------------------------------------------------------------------------------------------------------------------------------------------------------------------------------------------------------------------------------------------------------------------------------------------------------------------------------------------------------------------------------------------------------------------------------------------------------------------------------------------------------------------------------------------------------------------------------------------------------------------------------------------------------------------------------------------------------------------------------------------------------------------------------------------------------------------------------------------------------------------------------------------------------------------------------------------------------------------------------------------------------------------------------------------------------------------------------------------------------------------------------------------------------------------------------------------------------------------------------------------------------------------------------------------------------------------------------------------------------------------------------------------------------------------------|
| 6807 | nitrogen compound metabolic process | 536 out of 804 genes, 66.7% | 3438 out of 6473 background genes, 53.1% | 8.69E-14 | 0.00% | RIM8:HBR1:C1_00510W_A:CNS1:RRS1:NMA111:HMT1:C1_01130W_A:C1_01150C_A:C1_01160C_A:C1_01470W_A:C1_01530C_A:C1_01900C_A:C1_02090C_A:ABP140:C1_02310C_A:C1_02430C_A:C1_02440C_A:C1_02450C_A:HOM6:PDE2:MIA40:ATG17:TSR2:RPL6:ARO80:MAS1:C1_03370W_A:C1_03430W_A:C1_03790C_A:C1_03830C_A:C1_04040C_A:C1_04120C_A:ERB1:RPN4:NOP4:C1_04990C_A:RHD1:RRP6:C1_05220C_A:C1_05230W_A:C1_05360C_A:RPS27A:RIB4:C1_05630C_A:FAL1:C1_05650W_A:NPL4:C1_06120C_A:C1_06540C_A:NOP6:C1_06760C_A:C1_06770W_A:MRPL19:C1_06800W_A:CAT1:C1_06910C_A:SUI2:C1_07090C_A:RIA1:YMC1:YPD1:RME1:C1_07390W_A:PEX3:LHP1:C1_07510W_A:C1_07570C_A:ADE4:GCS1:ADE5,7:C1_07950C_A:FUN12:DRG1:GCD6:C1_08630W_A:MSS116:C1_09390W_A:GUA1:C1_09610W_A:C1_09710C_A:DBP3:TPK1:C1_10340W_A:C1_10410W_A:GLY1:C1_10620W_A:HNT1:C1_10970W_A:C1_11000C_A:C1_11370C_A:KRR1:GAR1:C1_11560C_A:GAD1:C1_11900C_A:C1_11910W_A:CSI2:C1_12350W_A:PKH2:C1_12440W_A:C1_12570C_A:CHR1:C1_12670C_A:C1_12760W_A:C1_13260W_A:C1_13270W_A:C1_13330C_A:AGC1:KNS1:HSP70:MET3:MODF:C1_14080W_A:FTR1:C1_14160W_A:SAM35:MPP10:FAV3:NDT80:HMA1:C2_00220C_A:C2_00280C_A:C2_00410C_A:C2_00620C_A:C2_00880W_A:MXR1:C2_01060C_A:C2_01070W_A:CLB2:C2_01510C_A:C2_01870C_A:ZCF6:C2_02420C_A:PRS1:C2_02540W_A:SER2:C2_02710C_A:HPT1:C2_02960C_A:LIG4:ADE8:C2_03130W_A:PRP3:C2_03360W_A:C2_03550C_A:C2_03700W_A:C2_03830W_A:C2_03910C_A:SCH9:GCD7:C2_04120C_A:UGA1:BAT21:C2_04570W_A:SNU114:C2_04820W_A:CRK1:C2_05080C_A:MAK5:ERF1:PEX2:C2_05160C_A:RPF2:RPC40:C2_05520W_A:KTI11:PNG2:TES1:LAS1:CNT:ECM17:IMH3:RTA2:C2_06480W_A:AMO2:RPL11:C2_06850W_A:C2_06890C_A:SPE3:C2_07070W_A:RCK2:C2_07140W_A:RPA12:NOC4:C2_07360W_A:SSC1:RCL1:RNR22:C2_07610C_A:PRS5:C2_07920W_A:NSA1:C2_08200W_A:ORF298:C2_08460C_A:RRP8:C2_08620W_A:TIF4631:RPT6:SPO11:C2_08840W_A:FPK1:SLP2:GLO2:PES1:RRP15:C2_09500W_A:C2_09660W_A:LEU42:C2_09930W_A:FCY21:YOR1:CWC22:OCA1:PUS7:TIF11:C2_10740C_A:RPC11:C2_10810W_A:C3_00100W_A:UTP8:BUD21:SOF1:MIH1:C3_00950C_A:BMS1:URA3:C3_01520C_A:C3_01560W_A:C3_02020W_A:C3_02030W_A:C3_02040C_A:UTP4:C3_02180C_A:C3_02350W_A:PHA2:C3_03070W_A:C3_03330C_A:C3_03470W_A:ULP1:HBR3:C3_03680W_A:SAP9:AGT1:URK1:C3_04370C_A:C3_04380C_A:ADE2:MAK21:RPP2B:SFP1:CEM1:C3_05140C_A:C3_05160C_A:WOR2:SAP3:C3_05380W_A:C3_05510W_A:QDR2:BAT22:C3_05790C_A:C3_05800W_A:C3_05860C_A:CTA4:NOG1:ELP3:DED1:C3_06150W_A:CYM1:HNT2:C3_06370C_A:NSA2:PRP5:C3_06760W_A:C3_06830C_A:C3_06860C_A:C3_06940W_A:NOP13:C3_07380W_A:C3_07400W_A:C3_07480W_A:C3_07550C_A:RIT1:UTP9:CAR2:DUR4:C4_00490W_A:RLP24:NMD5:C4_00690C_A:C4_00700C_A:C4_00810C_A:C4_00940W_A:MDN1:DAG7:RAT1:C4_01280C_A:PWP1:C4_01470W_A:NIP1:C4_01670C_A:TOA2:HGHI:HOS3:C4_02850W_A:ZU |
|------|-------------------------------------|-----------------------------|------------------------------------------|----------|-------|-----------------------------------------------------------------------------------------------------------------------------------------------------------------------------------------------------------------------------------------------------------------------------------------------------------------------------------------------------------------------------------------------------------------------------------------------------------------------------------------------------------------------------------------------------------------------------------------------------------------------------------------------------------------------------------------------------------------------------------------------------------------------------------------------------------------------------------------------------------------------------------------------------------------------------------------------------------------------------------------------------------------------------------------------------------------------------------------------------------------------------------------------------------------------------------------------------------------------------------------------------------------------------------------------------------------------------------------------------------------------------------------------------------------------------------------------------------------------------------------------------------------------------------------------------------------------------------------------------------------------------------------------------------------------------------------------------------------------------------------------------------------------------------------------------------------------------------------------------------------------------------------------------------------------------------------------------------------------------------------------------------------------------------------------------------------------------------------------------------------------------------------------------------------------------------------------------------------------------------------------------------------------------------------------------------------------------------------------------------------------------------------------------------------------------------------------------------------------------------------------------------------------------------------------------------------------------------------------------------------------------------------------------------------------|

|  |  |  |  |  |  |                                                                                                                                                                                                                                                                                                                                                                                                                                                                                                                                                                                                                                                                                                                                                                                                                                                                                                                                                                                                                                                                                                                                                                                                                                                                                                                                                                                                                                                                                                                                                                                                                                                                                                                                                                                                                                                                                                                                                                                                                                                           |
|--|--|--|--|--|--|-----------------------------------------------------------------------------------------------------------------------------------------------------------------------------------------------------------------------------------------------------------------------------------------------------------------------------------------------------------------------------------------------------------------------------------------------------------------------------------------------------------------------------------------------------------------------------------------------------------------------------------------------------------------------------------------------------------------------------------------------------------------------------------------------------------------------------------------------------------------------------------------------------------------------------------------------------------------------------------------------------------------------------------------------------------------------------------------------------------------------------------------------------------------------------------------------------------------------------------------------------------------------------------------------------------------------------------------------------------------------------------------------------------------------------------------------------------------------------------------------------------------------------------------------------------------------------------------------------------------------------------------------------------------------------------------------------------------------------------------------------------------------------------------------------------------------------------------------------------------------------------------------------------------------------------------------------------------------------------------------------------------------------------------------------------|
|  |  |  |  |  |  | <p>O1:C4_02880C_A:C4_03040W_A:C4_03050C_A:C4_03150W_A:C4_03720C_A:C4_03730C_A:C4_03740W_A:C4_03830W_A:RRP42:RAM1:C4_04090C_A:ECM1:C4_04270W_A:SAP10:C4_04500C_A:C4_04510W_A:OMA1:SSZ1:C4_04720W_A:C4_04810C_A:AGP3:NBP35:C4_05260W_A:C4_05650W_A:C4_06210C_A:SOU1:C4_06410W_A:MNN4:NOP1:C4_06790W_A:MET16:YDC1:C4_07060W_A:C4_07100C_A:C4_07140W_A:C5_00260W_A:C5_00280C_A:DUS4:RMT2:URA4:C5_00920W_A:C5_00950C_A:BUD23:PUS4:C5_01430C_A:FYV5:GLR1:SPB4:C5_01610W_A:MAS2:GIS2:C5_01930W_A:RIB2:C5_02010C_A:C5_02070C_A:RIX7:GCD11:TIF5:UTP13:C5_02730C_A:C5_03010W_A:RMS1:RPO26:FUR1:C5_03530C_A:C5_03640W_A:C5_03670C_A:FGR27:C5_03700C_A:HAM1:C5_03920C_A:C5_03970W_A:URA7:CSU57:C5_04610W_A:HAS1:C5_04990W_A:C5_05340W_A:PEX4:NOP5:FET31:C6_00530C_A:C6_00640C_A:C6_00760W_A:HAL21:C6_01040C_A:RCN1:CIC1:C6_01870C_A:C6_01890C_A:C6_01980C_A:C6_02230W_A:C6_02350C_A:NIP7:C6_02410W_A:GCV1:C6_02560W_A:MOB1:MRT4:POP4:C6_03210C_A:C6_03390W_A:FGR17:ALS5:SBA1:SHM2:SNQ2:SPB1:C6_04530C_A:C7_00160C_A:C7_00330C_A:C7_00380W_A:C7_00490C_A:RPA135:NOP15:C7_01030C_A:DBP7:GCN3:C7_01360C_A:FLU1:RAD14:C7_02100W_A:C7_02340C_A:C7_02460C_A:C7_02930C_A:ZCF29:CPY1:ISY1:ENP2:C7_03990C_A:C7_04140C_A:UTP18:MIS12:CR_00460C_A:PHO81:CR_00670C_A:BUD22:BMT3:PWP2:TRM1:CAB3:CR_01410C_A:CR_01700C_A:CR_01780W_A:CR_01950W_A:CR_02030C_A:CR_02420W_A:CR_02430C_A:CR_02460W_A:RPC19:DBP2:RPC31:CR_02890C_A:AQY1:SRP40:CR_03110W_A:CR_03230W_A:CR_03360W_A:KTI12:NCS2:YVH1:IFF3:SGD1:PRP42:CR_03760W_A:CR_03940W_A:GCD1:CR_04110W_A:CR_04160C_A:CR_04170W_A:CR_04240C_A:CR_04300W_A:NHP2:ADE6:RPB8:CR_04920W_A:YCP4:NOC2:CR_05550C_A:RNR3:MTG2:DBP8:VPS75:SFL1:SOK1:RPL7:FGR50:CR_06680C_A:NMD3:CR_06840W_A:CR_06980W_A:CR_07030C_A:CR_07080W_A:CR_07470W_A:CR_07480W_A:CR_07640C_A:DBP6:IMP4:CR_08000C_A:NOP10:SSB1:RIO2:CR_08130W_A:TRM9:HSP104:ATS1:CR_08330W_A:CYS3:GSH2:TSR1:PRP8:CR_08940W_A:CR_09110C_A:CR_09140C_A:CR_09310W_A:SSF1:CR_09800C_A:SIK1:UGA3:CR_09990W_A:CR_10170C_A:UTP5:AHA1:CR_10400W_A:CR_10410C_A:CR_10430C_A:CR_10470C_A:DRS1:POP3</p> |
|--|--|--|--|--|--|-----------------------------------------------------------------------------------------------------------------------------------------------------------------------------------------------------------------------------------------------------------------------------------------------------------------------------------------------------------------------------------------------------------------------------------------------------------------------------------------------------------------------------------------------------------------------------------------------------------------------------------------------------------------------------------------------------------------------------------------------------------------------------------------------------------------------------------------------------------------------------------------------------------------------------------------------------------------------------------------------------------------------------------------------------------------------------------------------------------------------------------------------------------------------------------------------------------------------------------------------------------------------------------------------------------------------------------------------------------------------------------------------------------------------------------------------------------------------------------------------------------------------------------------------------------------------------------------------------------------------------------------------------------------------------------------------------------------------------------------------------------------------------------------------------------------------------------------------------------------------------------------------------------------------------------------------------------------------------------------------------------------------------------------------------------|

|       |                                     |                             |                                          |          |       |                                                                                                                                                                                                                                                                                                                                                                                                                                                                                                                                                                                                                                                                                                                                                                                                                                                                                                                                                                                                                                                                                                                                                                                                                                                                                                                                                                                                                                                                                                                                                                                                                                                                                                                                                                                                                                                                                                                                                                                                                                                                                                                                                                                                                                                                                                                                                                                                                                                                                                                                                                                                                                                                            |
|-------|-------------------------------------|-----------------------------|------------------------------------------|----------|-------|----------------------------------------------------------------------------------------------------------------------------------------------------------------------------------------------------------------------------------------------------------------------------------------------------------------------------------------------------------------------------------------------------------------------------------------------------------------------------------------------------------------------------------------------------------------------------------------------------------------------------------------------------------------------------------------------------------------------------------------------------------------------------------------------------------------------------------------------------------------------------------------------------------------------------------------------------------------------------------------------------------------------------------------------------------------------------------------------------------------------------------------------------------------------------------------------------------------------------------------------------------------------------------------------------------------------------------------------------------------------------------------------------------------------------------------------------------------------------------------------------------------------------------------------------------------------------------------------------------------------------------------------------------------------------------------------------------------------------------------------------------------------------------------------------------------------------------------------------------------------------------------------------------------------------------------------------------------------------------------------------------------------------------------------------------------------------------------------------------------------------------------------------------------------------------------------------------------------------------------------------------------------------------------------------------------------------------------------------------------------------------------------------------------------------------------------------------------------------------------------------------------------------------------------------------------------------------------------------------------------------------------------------------------------------|
| 71704 | organic substance metabolic process | 571 out of 804 genes, 71.0% | 3737 out of 6473 background genes, 57.7% | 1.01E-13 | 0.00% | RIM8:PHR2:HBR1:GLO1:C1_00510W_A:CIS2:CNS1:RRS1:NMA111:HMT1:C1_01130W_A:C1_01150C_A:C1_01160C_A:C1_01470W_A:C1_01530C_A:C1_01900C_A:C1_02090C_A:ABP140:C1_02310C_A:C1_02430C_A:C1_02440C_A:C1_02450C_A:HOM6:PDE2:MIA40:ATG17:TSR2:RPL6:ARO80:MAS1:C1_03370W_A:EHT1:C1_03430W_A:C1_03790C_A:C1_03830C_A:C1_04040C_A:C1_04120C_A:ERB1:RPN4:NOP4:C1_04990C_A:RHD1:RRP6:C1_05220C_A:C1_05230W_A:C1_05360C_A:RPS27A:RIB4:C1_05630C_A:FAL1:C1_05650W_A:C1_05930C_A:NPL4:C1_06120C_A:C1_06540C_A:ANT1:NOP6:C1_06760C_A:C1_06770W_A:MRPL19:C1_06800W_A:CAT1:C1_06910C_A:SUI2:C1_07090C_A:RIA1:YMC1:YPD1:RME1:C1_07390W_A:PEX3:LHP1:C1_07510W_A:C1_07570C_A:ADE4:GCS1:ADE5,7:C1_07950C_A:FUN12:DRG1:GCD6:C1_08630W_A:MSS116:C1_09390W_A:FTH1:GUA1:C1_09610W_A:C1_09710C_A:DBP3:TPK1:C1_10340W_A:C1_10410W_A:GLY1:C1_10620W_A:HNT1:C1_10970W_A:C1_11000C_A:C1_11370C_A:KRR1:GAR1:C1_11560C_A:GAD1:C1_11900C_A:C1_11910W_A:CSI2:C1_12350W_A:PKH2:C1_12440W_A:C1_12570C_A:CHR1:C1_12670C_A:C1_12760W_A:RBK1:C1_13260W_A:C1_13270W_A:C1_13330C_A:KNS1:HSP70:MET3:MODF:C1_14080W_A:FTR1:C1_14160W_A:SAM35:MPP10:FAV3:NDT80:HMA1:C2_00220C_A:C2_00280C_A:C2_00410C_A:C2_00620C_A:C2_00880W_A:MXR1:C2_01060C_A:C2_01070W_A:CLB2:C2_01510C_A:C2_01870C_A:ZCF6:C2_01920C_A:C2_02420C_A:PRS1:C2_02540W_A:FGR22:SER2:C2_02710C_A:HPT1:C2_02960C_A:LIG4:PLC2:ADE8:C2_03130W_A:PRP3:C2_03360W_A:C2_03550C_A:MNN42:C2_03700W_A:C2_03830W_A:C2_03910C_A:SCH9:GCD7:C2_04120C_A:UGA1:BAT21:C2_04570W_A:SNU114:C2_04820W_A:CRK1:C2_05080C_A:MAK5:ERF1:PEX2:C2_05160C_A:RPF2:RPC40:PEX6:C2_05520W_A:KTI11:PNG2:TES1:LAS1:CNT:ECM17:IMH3:RTA2:C2_06480W_A:AMO2:RPL11:C2_06850W_A:C2_06890C_A:SPE3:C2_07070W_A:RCK2:C2_07140W_A:RPA12:NOC4:C2_07360W_A:SSC1:C2_07410W_A:RCL1:RNR22:C2_07610C_A:PRS5:C2_07920W_A:NSA1:C2_08200W_A:ORF298:C2_08460C_A:RRP8:C2_08620W_A:TIF4631:RPT6:SPO11:C2_08840W_A:FPK1:SLP2:GLO2:PES1:RRP15:C2_09500W_A:C2_09660W_A:LEU42:C2_09930W_A:FCY21:YOR1:CWC22:OCA1:GPD1:PUS7:MTR2:TIF11:C2_10740C_A:RPC11:C2_10810W_A:C3_00100W_A:UTP8:BUD21:SOF1:MIH1:C3_00950C_A:BMS1:URA3:C3_01520C_A:C3_01560W_A:C3_02020W_A:C3_02030W_A:C3_02040C_A:UTP4:C3_02180C_A:C3_02350W_A:PHA2:C3_03070W_A:C3_03330C_A:C3_03470W_A:ULP1:HBR3:C3_03680W_A:SAP9:AGT1:URK1:C3_04370C_A:C3_04380C_A:ADE2:MAK21:RPP2B:SFP1:CEM1:C3_05140C_A:C3_05160C_A:WOR2:SAP3:C3_05380W_A:C3_05510W_A:QDR2:BAT22:C3_05790C_A:C3_05800W_A:C3_05860C_A:CTA4:NOG1:ELP3:DED1:C3_06150W_A:CYM1:HNT2:C3_06370C_A:NSA2:PRP5:C3_06760W_A:C3_06830C_A:C3_06860C_A:C3_06940W_A:NOP13:GCY1:C3_07380W_A:C3_07400W_A:C3_07480W_A:C3_07550C_A:RIT1:C3_07670W_A:UTP9:CAR2:DUR4:C4_00490W_A:RLP24:NMD5:C4_00690C_A:C4_00700C_A:C4_0 |
|-------|-------------------------------------|-----------------------------|------------------------------------------|----------|-------|----------------------------------------------------------------------------------------------------------------------------------------------------------------------------------------------------------------------------------------------------------------------------------------------------------------------------------------------------------------------------------------------------------------------------------------------------------------------------------------------------------------------------------------------------------------------------------------------------------------------------------------------------------------------------------------------------------------------------------------------------------------------------------------------------------------------------------------------------------------------------------------------------------------------------------------------------------------------------------------------------------------------------------------------------------------------------------------------------------------------------------------------------------------------------------------------------------------------------------------------------------------------------------------------------------------------------------------------------------------------------------------------------------------------------------------------------------------------------------------------------------------------------------------------------------------------------------------------------------------------------------------------------------------------------------------------------------------------------------------------------------------------------------------------------------------------------------------------------------------------------------------------------------------------------------------------------------------------------------------------------------------------------------------------------------------------------------------------------------------------------------------------------------------------------------------------------------------------------------------------------------------------------------------------------------------------------------------------------------------------------------------------------------------------------------------------------------------------------------------------------------------------------------------------------------------------------------------------------------------------------------------------------------------------------|

|  |  |  |  |  |                                                                                                                                                                                                                                                                                                                                                                                                                                                                                                                                                                                                                                                                                                                                                                                                                                                                                                                                                                                                                                                                                                                                                                                                                                                                                                                                                                                                                                                                                                                                                                                                                                                                                                                                                                                                                                                                                                                                                                                                                                                                                                                                                                                                                                                                                                                                                                                                                                        |
|--|--|--|--|--|----------------------------------------------------------------------------------------------------------------------------------------------------------------------------------------------------------------------------------------------------------------------------------------------------------------------------------------------------------------------------------------------------------------------------------------------------------------------------------------------------------------------------------------------------------------------------------------------------------------------------------------------------------------------------------------------------------------------------------------------------------------------------------------------------------------------------------------------------------------------------------------------------------------------------------------------------------------------------------------------------------------------------------------------------------------------------------------------------------------------------------------------------------------------------------------------------------------------------------------------------------------------------------------------------------------------------------------------------------------------------------------------------------------------------------------------------------------------------------------------------------------------------------------------------------------------------------------------------------------------------------------------------------------------------------------------------------------------------------------------------------------------------------------------------------------------------------------------------------------------------------------------------------------------------------------------------------------------------------------------------------------------------------------------------------------------------------------------------------------------------------------------------------------------------------------------------------------------------------------------------------------------------------------------------------------------------------------------------------------------------------------------------------------------------------------|
|  |  |  |  |  | 0810C_A:C4_00940W_A:MDN1:DAG7:RAT1:C4_01280C_A:PWP1:C4_01470W_A:NI<br>P1:C4_01670C_A:TOA2:HGH1:HOS3:C4_02620C_A:C4_02850W_A:ZUO1:C4_02880<br>C_A:C4_03040W_A:C4_03050C_A:C4_03150W_A:C4_03720C_A:C4_03730C_A:C4_<br>03740W_A:C4_03830W_A:RRP42:RAM1:C4_04090C_A:ECM1:C4_04270W_A:SAP10<br>:C4_04500C_A:C4_04510W_A:OMA1:SSZ1:C4_04720W_A:C4_04810C_A:AGP3:NBP<br>35:C4_05260W_A:C4_05650W_A:C4_06210C_A:SOU1:C4_06410W_A:MNN4:NOP1:<br>C4_06790W_A:MNN46:MET16:YDC1:C4_07060W_A:C4_07100C_A:C4_07140W_A:<br>VIP1:C5_00260W_A:C5_00280C_A:DUS4:RMT2:URA4:C5_00920W_A:C5_00950C_A<br>:BUD23:PUS4:C5_01430C_A:FYV5:GLR1:SPB4:C5_01610W_A:MAS2:GIS2:C5_01930<br>W_A:RIB2:C5_02010C_A:C5_02070C_A:RIX7:GCD11:TIF5:UTP13:C5_02730C_A:C5_<br>03010W_A:RMS1:RPO26:FUR1:C5_03530C_A:C5_03550W_A:C5_03640W_A:C5_03<br>670C_A:FGR27:C5_03700C_A:HAM1:C5_03920C_A:C5_03970W_A:URA7:CSU57:C5<br>_04610W_A:HAS1:C5_04990W_A:C5_05340W_A:PEX4:NOP5:FET31:C6_00530C_A:<br>C6_00640C_A:C6_00760W_A:HAL21:C6_01040C_A:RCN1:CIC1:EBP1:C6_01300W_A<br>:ACF2:C6_01870C_A:C6_01890C_A:C6_01980C_A:C6_02230W_A:C6_02350C_A:NIP<br>7:C6_02410W_A:C6_02420W_A:C6_02480W_A:GCV1:C6_02560W_A:MOB1:MRT4:<br>POP4:EMF1:C6_03210C_A:BMT4:C6_03390W_A:FGR17:PAD1:ALS5:SBA1:SHM2:SN<br>Q2:SPB1:C6_04530C_A:NAG1:C7_00160C_A:C7_00330C_A:C7_00380W_A:C7_0049<br>0C_A:RPA135:NOP15:C7_01030C_A:DBP7:GCN3:C7_01360C_A:FLU1:RAD14:C7_021<br>00W_A:YCF1:C7_02340C_A:C7_02460C_A:PEX1:C7_02930C_A:ZCF29:CPY1:ISY1:EN<br>P2:C7_03990C_A:C7_04140C_A:UTP18:MIS12:CR_00460C_A:PHO81:CR_00670C_A:<br>BUD22:BMT3:PWP2:TRM1:CAB3:CR_01410C_A:CR_01700C_A:CR_01780W_A:CR_0<br>1950W_A:CR_02030C_A:CR_02420W_A:CR_02430C_A:CR_02460W_A:RPC19:DBP2<br>:RPC31:CR_02890C_A:AQY1:SRP40:CR_03110W_A:CR_03230W_A:CR_03360W_A:K<br>TI12:NCS2:YVH1:IFF3:SGD1:PRP42:CR_03760W_A:CR_03940W_A:GCD1:MEX67:CR_<br>04110W_A:CR_04160C_A:CR_04170W_A:CR_04240C_A:CR_04300W_A:NHP2:ADE6<br>:RPB8:CR_04920W_A:YCP4:NOC2:CR_05550C_A:RNR3:MTG2:DBP8:VPS75:SFL1:SOK<br>1:RPL7:FGR50:CR_06680C_A:NMD3:CR_06840W_A:CR_06980W_A:CR_07030C_A:C<br>R_07080W_A:CR_07470W_A:CR_07480W_A:CR_07640C_A:DBP6:IMP4:CR_08000C<br>_A:NOP10:SSB1:RIO2:CR_08130W_A:TRM9:HSP104:ATS1:CR_08330W_A:CYS3:GSH<br>2:TSR1:PRP8:CR_08940W_A:CR_09110C_A:CR_09140C_A:CR_09310W_A:ELF1:CR_<br>09670C_A:SSF1:CR_09800C_A:SIK1:UGA3:CR_09990W_A:CR_10170C_A:UTP5:AHA1<br>:CR_10400W_A:CR_10410C_A:CR_10430C_A:CR_10470C_A:DRS1:POP3 |
|--|--|--|--|--|----------------------------------------------------------------------------------------------------------------------------------------------------------------------------------------------------------------------------------------------------------------------------------------------------------------------------------------------------------------------------------------------------------------------------------------------------------------------------------------------------------------------------------------------------------------------------------------------------------------------------------------------------------------------------------------------------------------------------------------------------------------------------------------------------------------------------------------------------------------------------------------------------------------------------------------------------------------------------------------------------------------------------------------------------------------------------------------------------------------------------------------------------------------------------------------------------------------------------------------------------------------------------------------------------------------------------------------------------------------------------------------------------------------------------------------------------------------------------------------------------------------------------------------------------------------------------------------------------------------------------------------------------------------------------------------------------------------------------------------------------------------------------------------------------------------------------------------------------------------------------------------------------------------------------------------------------------------------------------------------------------------------------------------------------------------------------------------------------------------------------------------------------------------------------------------------------------------------------------------------------------------------------------------------------------------------------------------------------------------------------------------------------------------------------------------|

|       |                           |                           |                                       |          |       |                                                                                                                                                                                                                                                                                                                                                                                                                  |
|-------|---------------------------|---------------------------|---------------------------------------|----------|-------|------------------------------------------------------------------------------------------------------------------------------------------------------------------------------------------------------------------------------------------------------------------------------------------------------------------------------------------------------------------------------------------------------------------|
| 43414 | macromolecule methylation | 39 out of 804 genes, 4.9% | 77 out of 6473 background genes, 1.2% | 3.56E-13 | 0.00% | HMT1:C1_01150C_A:ABP140:C1_14160W_A:C2_00620C_A:C2_02960C_A:C2_03130W_A:C2_05520W_A:C2_06480W_A:C2_07360W_A:RRP8:C2_08840W_A:C3_05140C_A:C3_05860C_A:C3_07400W_A:C4_03730C_A:C4_03830W_A:C4_04500C_A:C4_04810C_A:NOP1:RMT2:C5_00950C_A:BUD23:RMS1:SPB1:C6_04530C_A:C7_00490C_A:C7_02340C_A:CR_00670C_A:TRM1:CR_01780W_A:CR_02030C_A:CR_03760W_A:CR_04160C_A:CR_04170W_A:CR_04300W_A:TRM9:CR_08940W_A:CR_09310W_A |
| 32259 | methylation               | 39 out of 804 genes, 4.9% | 78 out of 6473 background genes, 1.2% | 6.30E-13 | 0.00% | HMT1:C1_01150C_A:ABP140:C1_14160W_A:C2_00620C_A:C2_02960C_A:C2_03130W_A:C2_05520W_A:C2_06480W_A:C2_07360W_A:RRP8:C2_08840W_A:C3_05140C_A:C3_05860C_A:C3_07400W_A:C4_03730C_A:C4_03830W_A:C4_04500C_A:C4_04810C_A:NOP1:RMT2:C5_00950C_A:BUD23:RMS1:SPB1:C6_04530C_A:C7_00490C_A:C7_02340C_A:CR_00670C_A:TRM1:CR_01780W_A:CR_02030C_A:CR_03760W_A:CR_04160C_A:CR_04170W_A:CR_04300W_A:TRM9:CR_08940W_A:CR_09310W_A |

|       |                           |                             |                                          |          |       |                                                                                                                                                                                                                                                                                                                                                                                                                                                                                                                                                                                                                                                                                                                                                                                                                                                                                                                                                                                                                                                                                                                                                                                                                                                                                                                                                                                                                                                                                                                                                                                                                                                                                                                                                                                                                                                                                                                                                                                                                                                                                                                                                                                                                                                                                                                                                                                                                                                                                                                                                                                                                                                                        |
|-------|---------------------------|-----------------------------|------------------------------------------|----------|-------|------------------------------------------------------------------------------------------------------------------------------------------------------------------------------------------------------------------------------------------------------------------------------------------------------------------------------------------------------------------------------------------------------------------------------------------------------------------------------------------------------------------------------------------------------------------------------------------------------------------------------------------------------------------------------------------------------------------------------------------------------------------------------------------------------------------------------------------------------------------------------------------------------------------------------------------------------------------------------------------------------------------------------------------------------------------------------------------------------------------------------------------------------------------------------------------------------------------------------------------------------------------------------------------------------------------------------------------------------------------------------------------------------------------------------------------------------------------------------------------------------------------------------------------------------------------------------------------------------------------------------------------------------------------------------------------------------------------------------------------------------------------------------------------------------------------------------------------------------------------------------------------------------------------------------------------------------------------------------------------------------------------------------------------------------------------------------------------------------------------------------------------------------------------------------------------------------------------------------------------------------------------------------------------------------------------------------------------------------------------------------------------------------------------------------------------------------------------------------------------------------------------------------------------------------------------------------------------------------------------------------------------------------------------------|
| 44238 | primary metabolic process | 550 out of 804 genes, 68.4% | 3618 out of 6473 background genes, 55.9% | 9.25E-12 | 0.00% | RIM8:PHR2:HBR1:CNS1:RRS1:NMA111:HMT1:C1_01130W_A:C1_01150C_A:C1_01160C_A:C1_01470W_A:C1_01530C_A:C1_01900C_A:C1_02090C_A:ABP140:C1_02310C_A:C1_02430C_A:C1_02440C_A:C1_02450C_A:HOM6:PDE2:MIA40:ATG17:TSR2:RPL6:ARO80:MAS1:C1_03370W_A:EHT1:C1_03430W_A:C1_03790C_A:C1_03830C_A:C1_04040C_A:C1_04120C_A:ERB1:RPN4:NOP4:C1_04990C_A:RHD1:RRP6:C1_05220C_A:C1_05230W_A:C1_05360C_A:RPS27A:RIB4:C1_05630C_A:FAL1:C1_05650W_A:NPL4:C1_06120C_A:C1_06540C_A:ANT1:NOP6:C1_06760C_A:C1_06770W_A:MRPL19:C1_06800W_A:CAT1:C1_06910C_A:SUI2:C1_07090C_A:RIA1:YPD1:RME1:C1_07390W_A:PEX3:LHP1:C1_07510W_A:C1_07570C_A:ADE4:GCS1:ADE5,7:C1_07950C_A:FUN12:DRG1:GCD6:C1_08630W_A:MSS116:C1_09390W_A:FTH1:GUA1:C1_09610W_A:C1_09710C_A:DBP3:TPK1:C1_10340W_A:C1_10410W_A:GLY1:C1_10620W_A:HNT1:C1_10970W_A:C1_11000C_A:C1_11370C_A:KRR1:GAR1:C1_11560C_A:GAD1:C1_11900C_A:C1_11910W_A:CSI2:C1_12350W_A:PKH2:C1_12440W_A:C1_12570C_A:CHR1:C1_12670C_A:C1_12760W_A:RBK1:C1_13260W_A:C1_13270W_A:KNS1:HSP70:MODF:C1_14080W_A:FTR1:C1_14160W_A:SAM35:MPP10:FAV3:NDT80:HMA1:C2_00220C_A:C2_00280C_A:C2_00410C_A:C2_00620C_A:C2_00880W_A:MXR1:C2_01060C_A:C2_01070W_A:CLB2:C2_01510C_A:C2_01870C_A:ZCF6:C2_01920C_A:C2_02420C_A:PRS1:C2_02540W_A:FGR22:SER2:C2_02710C_A:HPT1:C2_02960C_A:LIG4:PLC2:ADE8:C2_03130W_A:PRP3:C2_03360W_A:C2_03550C_A:MNN42:C2_03700W_A:C2_03830W_A:C2_03910C_A:SCH9:GCD7:C2_04120C_A:UGA1:BAT21:C2_04570W_A:SNU114:C2_04820W_A:CRK1:C2_05080C_A:MAK5:ERF1:PEX2:C2_05160C_A:RPF2:RPC40:PEX6:C2_05520W_A:KTI11:PNG2:TES1:LAS1:CNT:ECM17:IMH3:RTA2:C2_06480W_A:RPL11:C2_06850W_A:C2_06890C_A:SPE3:C2_07070W_A:RCRK2:C2_07140W_A:RPA12:NOC4:C2_07360W_A:SSC1:C2_07410W_A:RCL1:RNR22:C2_07610C_A:PRS5:C2_07920W_A:NSA1:C2_08200W_A:ORF298:C2_08460C_A:RRP8:C2_08620W_A:TIF4631:RPT6:SPO11:C2_08840W_A:FPK1:SLP2:GLO2:PES1:RRP15:C2_09500W_A:C2_09660W_A:LEU42:C2_09930W_A:FCY21:YOR1:CWC22:OCA1:GPD1:PUS7:TIF11:C2_10740C_A:RPC11:C2_10810W_A:C3_00100W_A:UTP8:BUD21:SOF1:MIH1:C3_00950C_A:BMS1:URA3:C3_01520C_A:C3_01560W_A:C3_02020W_A:C3_02030W_A:C3_02040C_A:UTP4:C3_02180C_A:C3_02350W_A:PHA2:C3_03070W_A:C3_03330C_A:C3_03470W_A:ULP1:HBR3:C3_03680W_A:SAP9:URK1:C3_04370C_A:C3_04380C_A:ADE2:MAK21:RPP2B:SFP1:CEM1:C3_05140C_A:C3_05160C_A:WOR2:SAP3:C3_05380W_A:C3_05510W_A:QDR2:BAT22:C3_05790C_A:C3_05800W_A:C3_05860C_A:CTA4:NOG1:ELP3:DED1:C3_06150W_A:CYM1:HNT2:C3_06370C_A:NSA2:PRP5:C3_06760W_A:C3_06830C_A:C3_06860C_A:C3_06940W_A:NOP13:GCY1:C3_07380W_A:C3_07400W_A:C3_07480W_A:C3_07550C_A:RIT1:C3_07670W_A:UTP9:CAR2:DUR4:C4_00490W_A:RLP24:NMD5:C4_00690C_A:C4_00700C_A:C4_00810C_A:C4_00940W_A:MDN1:DAG7:RAT1:C4_01280C_A:PWP1:C4_01470W_A:NI |
|-------|---------------------------|-----------------------------|------------------------------------------|----------|-------|------------------------------------------------------------------------------------------------------------------------------------------------------------------------------------------------------------------------------------------------------------------------------------------------------------------------------------------------------------------------------------------------------------------------------------------------------------------------------------------------------------------------------------------------------------------------------------------------------------------------------------------------------------------------------------------------------------------------------------------------------------------------------------------------------------------------------------------------------------------------------------------------------------------------------------------------------------------------------------------------------------------------------------------------------------------------------------------------------------------------------------------------------------------------------------------------------------------------------------------------------------------------------------------------------------------------------------------------------------------------------------------------------------------------------------------------------------------------------------------------------------------------------------------------------------------------------------------------------------------------------------------------------------------------------------------------------------------------------------------------------------------------------------------------------------------------------------------------------------------------------------------------------------------------------------------------------------------------------------------------------------------------------------------------------------------------------------------------------------------------------------------------------------------------------------------------------------------------------------------------------------------------------------------------------------------------------------------------------------------------------------------------------------------------------------------------------------------------------------------------------------------------------------------------------------------------------------------------------------------------------------------------------------------------|



|  |  |  |  |  |  |                                                                                                                                                                                                                                                                                                                                                                                                                                                                                                                                                                                                                                                                                                                                                                                                                                                                                                                                                                                                                                                                                                                                                                                                                                                                                                                                                                                                                                                                                                                                                                                                                                                                                                                                                                                                                                                                                                                                                                                                                                                                                                                                                |
|--|--|--|--|--|--|------------------------------------------------------------------------------------------------------------------------------------------------------------------------------------------------------------------------------------------------------------------------------------------------------------------------------------------------------------------------------------------------------------------------------------------------------------------------------------------------------------------------------------------------------------------------------------------------------------------------------------------------------------------------------------------------------------------------------------------------------------------------------------------------------------------------------------------------------------------------------------------------------------------------------------------------------------------------------------------------------------------------------------------------------------------------------------------------------------------------------------------------------------------------------------------------------------------------------------------------------------------------------------------------------------------------------------------------------------------------------------------------------------------------------------------------------------------------------------------------------------------------------------------------------------------------------------------------------------------------------------------------------------------------------------------------------------------------------------------------------------------------------------------------------------------------------------------------------------------------------------------------------------------------------------------------------------------------------------------------------------------------------------------------------------------------------------------------------------------------------------------------|
|  |  |  |  |  |  | P1:C4_01670C_A:TOA2:HG1:HOS3:C4_02620C_A:C4_02850W_A:ZUO1:C4_02880C_A:C4_03040W_A:C4_03050C_A:C4_03150W_A:C4_03720C_A:C4_03730C_A:C4_03740W_A:C4_03830W_A:RRP42:RAM1:C4_04090C_A:ECM1:SAP10:C4_04500C_A:C4_04510W_A:OMA1:SSZ1:C4_04720W_A:C4_04810C_A:AGP3:NBP35:C4_05260W_A:C4_05650W_A:C4_06210C_A:SOU1:C4_06410W_A:MNN4:NOP1:C4_06790W_A:MNN46:MET16:YDC1:C4_07060W_A:C4_07100C_A:C4_07140W_A:C5_00260W_A:C5_00280C_A:DUS4:RMT2:URA4:C5_00920W_A:C5_00950C_A:BUD23:PUS4:C5_01430C_A:FYV5:GLR1:SPB4:C5_01610W_A:MAS2:GIS2:C5_01930W_A:RIB2:C5_02010C_A:C5_02070C_A:RIX7:GCD11:TIF5:UTP13:C5_02730C_A:C5_03010W_A:RMS1:RP026:FUR1:C5_03530C_A:C5_03640W_A:C5_03670C_A:FGR27:C5_03700C_A:HAM1:C5_03920C_A:C5_03970W_A:URA7:CSU57:C5_04610W_A:HAS1:C5_04990W_A:C5_05340W_A:PEX4:NOP5:FET31:C6_00530C_A:C6_00640C_A:C6_00760W_A:HAL21:C6_01040C_A:RCN1:CIC1:EBP1:C6_01300W_A:ACF2:C6_01870C_A:C6_01890C_A:C6_01980C_A:C6_02230W_A:C6_02350C_A:NIP7:C6_02410W_A:C6_02420W_A:GCV1:C6_02560W_A:MOB1:MRT4:POP4:C6_03210C_A:BMT4:C6_03390W_A:FGR17:AL55:SBA1:SHM2:SNQ2:SPB1:C6_04530C_A:NAG1:C7_00160C_A:C7_00330C_A:C7_00380W_A:C7_00490C_A:RPA135:NOP15:C7_01030C_A:DBP7:GCN3:C7_01360C_A:FLU1:RAD14:C7_02100W_A:C7_02340C_A:C7_02460C_A:PEX1:C7_02930C_A:ZCF29:CPY1:ISY1:ENP2:C7_03990C_A:C7_04140C_A:UTP18:CR_00460C_A:PHO81:CR_00670C_A:BUD22:BMT3:PWP2:TRM1:CAB3:CR_01410C_A:CR_01700C_A:CR_01780W_A:CR_01950W_A:CR_02030C_A:CR_02420W_A:CR_02430C_A:CR_02460W_A:RPC19:DBP2:RPC31:CR_02890C_A:AQY1:SRP40:CR_03110W_A:CR_03230W_A:CR_03360W_A:KTI12:NCS2:YVH1:IFF3:SGD1:PRP42:CR_03760W_A:CR_03940W_A:GCD1:CR_04110W_A:CR_04160C_A:CR_04170W_A:CR_04240C_A:CR_04300W_A:NHP2:ADE6:RPB8:CR_04920W_A:YCP4:NOC2:CR_05550C_A:RNR3:MTG2:DBP8:VPS75:SFL1:SOK1:RPL7:FGR50:CR_06680C_A:NMD3:CR_06840W_A:CR_06980W_A:CR_07030C_A:CR_07080W_A:CR_07470W_A:CR_07480W_A:CR_07640C_A:DBP6:IMP4:CR_08000C_A:NOP10:SSB1:RIO2:CR_08130W_A:TRM9:HSP104:ATS1:CR_08330W_A:CYS3:GSH2:TSR1:PRP8:CR_08940W_A:CR_09110C_A:CR_09140C_A:CR_09310W_A:SSF1:CR_09800C_A:SIK1:UGA3:CR_09990W_A:CR_10170C_A:UTP5:AHA1:CR_10400W_A:CR_10410C_A:CR_10430C_A:CR_10470C_A:DRS1:POP3 |
|--|--|--|--|--|--|------------------------------------------------------------------------------------------------------------------------------------------------------------------------------------------------------------------------------------------------------------------------------------------------------------------------------------------------------------------------------------------------------------------------------------------------------------------------------------------------------------------------------------------------------------------------------------------------------------------------------------------------------------------------------------------------------------------------------------------------------------------------------------------------------------------------------------------------------------------------------------------------------------------------------------------------------------------------------------------------------------------------------------------------------------------------------------------------------------------------------------------------------------------------------------------------------------------------------------------------------------------------------------------------------------------------------------------------------------------------------------------------------------------------------------------------------------------------------------------------------------------------------------------------------------------------------------------------------------------------------------------------------------------------------------------------------------------------------------------------------------------------------------------------------------------------------------------------------------------------------------------------------------------------------------------------------------------------------------------------------------------------------------------------------------------------------------------------------------------------------------------------|

|       |                                               |                             |                                          |          |       |                                                                                                                                                                                                                                                                                                                                                                                                                                                                                                                                                                                                                                                                                                                                                                                                                                                                                                                                                                                                                                                                                                                                                                                                                                                                                                                                                                                                                                                                                                                                                                                                                                                                                                                                                                                                                                                                                                                                                                                                                                                                                                                                                                                                                                                                                                                                                                                                                                                                                                                                                                                                                                                                          |
|-------|-----------------------------------------------|-----------------------------|------------------------------------------|----------|-------|--------------------------------------------------------------------------------------------------------------------------------------------------------------------------------------------------------------------------------------------------------------------------------------------------------------------------------------------------------------------------------------------------------------------------------------------------------------------------------------------------------------------------------------------------------------------------------------------------------------------------------------------------------------------------------------------------------------------------------------------------------------------------------------------------------------------------------------------------------------------------------------------------------------------------------------------------------------------------------------------------------------------------------------------------------------------------------------------------------------------------------------------------------------------------------------------------------------------------------------------------------------------------------------------------------------------------------------------------------------------------------------------------------------------------------------------------------------------------------------------------------------------------------------------------------------------------------------------------------------------------------------------------------------------------------------------------------------------------------------------------------------------------------------------------------------------------------------------------------------------------------------------------------------------------------------------------------------------------------------------------------------------------------------------------------------------------------------------------------------------------------------------------------------------------------------------------------------------------------------------------------------------------------------------------------------------------------------------------------------------------------------------------------------------------------------------------------------------------------------------------------------------------------------------------------------------------------------------------------------------------------------------------------------------------|
| 71840 | cellular component organization or biogenesis | 373 out of 804 genes, 46.4% | 2243 out of 6473 background genes, 34.7% | 1.84E-10 | 0.00% | PHR2:HBR1:CNS1:RRS1:CCH1:C1_01160C_A:C1_01470W_A:C1_01900C_A:C1_02090C_A:ABP140:C1_02310C_A:C1_02450C_A:PDE2:MIA40:ATG17:TSR2:RPL6:ARO80:ARX1:MAS1:C1_03790C_A:C1_03830C_A:C1_04040C_A:C1_04120C_A:ERB1:C1_04340C_A:NOP4:RRP6:C1_05210C_A:C1_05220C_A:C1_05230W_A:C1_05360C_A:RPS27A:FAL1:C1_05650W_A:NPL4:C1_06540C_A:ANT1:NOP6:C1_06760C_A:C1_06770W_A:C1_06800W_A:SUI2:C1_07090C_A:RIA1:YPD1:PEX3:C1_07510W_A:C1_07570C_A:C1_07950C_A:FUN12:GCD6:C1_08630W_A:MSS116:JIP5:C1_09060C_A:C1_09390W_A:YTM1:C1_09710C_A:DBP3:TPK1:C1_10620W_A:C1_10970W_A:C1_11000C_A:C1_11010C_A:TIM50:C1_11370C_A:KRR1:GAR1:C1_11560C_A:C1_11900C_A:C1_11910W_A:CSI2:C1_12350W_A:C1_12440W_A:C1_12570C_A:CHR1:C1_12680W_A:C1_12760W_A:C1_13270W_A:C1_13370W_A:AGC1:KNS1:SIM1:C1_14080W_A:SAM35:MPP10:FAV3:NDT80:C2_00280C_A:C2_00410C_A:C2_00810C_A:C2_01070W_A:CLB2:C2_01510C_A:C2_02420C_A:PRS1:C2_02540W_A:C2_02710C_A:PRP3:MNN42:SCH9:C2_04120C_A:C2_04570W_A:SNU114:C2_04820W_A:C2_05080C_A:MAK5:ERF1:PEX2:C2_05160C_A:RPF2:PEX6:C2_05520W_A:TES1:LAS1:CNT:ECM17:RTA3:RTA2:RPL11:C2_06850W_A:RCK2:NOC4:C2_07360W_A:SSC1:RCL1:PRS5:C2_07920W_A:NSA1:KRE30:RRP8:TIF4631:RPT6:SPO11:C2_08840W_A:FPK1:C2_09070C_A:PES1:RRP15:C2_09660W_A:TIM23:CWC22:OCA1:GPD1:PUS7:MTR2:TIF11:C2_10740C_A:C2_10810W_A:C3_00100W_A:UTP8:BUD21:SOF1:C3_00950C_A:BMS1:C3_01560W_A:C3_02020W_A:C3_02040C_A:UTP4:C3_02350W_A:C3_03070W_A:C3_03330C_A:C3_03470W_A:HBR3:SAP9:URK1:C3_04370C_A:C3_04380C_A:MAK21:SFP1:CEM1:C3_05160C_A:WOR2:C3_05380W_A:QDR2:C3_05800W_A:C3_05860C_A:NOG1:DED1:C3_06150W_A:C3_06370C_A:NSA2:PRP5:C3_06760W_A:C3_07100C_A:NOP13:C3_07480W_A:C3_07550C_A:UTP9:DUR4:C4_00490W_A:RLP24:NMD5:C4_00690C_A:C4_00700C_A:C4_00810C_A:MDN1:RAT1:C4_01130C_A:C4_01280C_A:PWP1:C4_01670C_A:TOA2:C4_02720C_A:ZUO1:C4_02880C_A:C4_03040W_A:DNF3:C4_03150W_A:C4_03720C_A:C4_03740W_A:C4_03830W_A:RRP42:RAM1:ECM1:SAP10:C4_04510W_A:OMA1:SSZ1:AGP3:C4_05010W_A:MYO5:NBP35:C4_05260W_A:C4_05650W_A:C4_06210C_A:C4_06410W_A:NOP1:C4_06790W_A:MNN46:C4_07060W_A:C4_07100C_A:C4_07140W_A:C5_00260W_A:C5_00280C_A:RMT2:C5_00920W_A:C5_00950C_A:BUD23:PUS4:C5_01430C_A:FYV5:SPB4:MAS2:C5_01930W_A:RIB2:C5_02010C_A:C5_02070C_A:RIX7:GCD11:TIF5:UTP13:C5_03010W_A:RMS1:C5_03550W_A:C5_03670C_A:FGR27:C5_03920C_A:C5_03970W_A:C5_04610W_A:HAS1:C5_04990W_A:C5_05340W_A:PEX4:NOP5:C6_01040C_A:RCN1:CIC1:ACF2:C6_01890C_A:C6_02230W_A:NIP7:MOB1:SAC6:MRT4:POP4:C6_03210C_A:C6_03390W_A:ALS5:SNQ2:SPB1:C7_00160C_A:C7_00330C_A:RPA135:NOP15:C7_01030C_A:DBP7:C7_01360C_A:FLU1:RAD14:C7_02100W_A:FMP45:YCF1:C7_02460C_A:PEX1:C7_02930C_A:ISY1:ENP2:MAM33:C7_04140C_A:UTP18:CR_00460C_A:BUD22:BMT3:PWP2:CR_0 |
|-------|-----------------------------------------------|-----------------------------|------------------------------------------|----------|-------|--------------------------------------------------------------------------------------------------------------------------------------------------------------------------------------------------------------------------------------------------------------------------------------------------------------------------------------------------------------------------------------------------------------------------------------------------------------------------------------------------------------------------------------------------------------------------------------------------------------------------------------------------------------------------------------------------------------------------------------------------------------------------------------------------------------------------------------------------------------------------------------------------------------------------------------------------------------------------------------------------------------------------------------------------------------------------------------------------------------------------------------------------------------------------------------------------------------------------------------------------------------------------------------------------------------------------------------------------------------------------------------------------------------------------------------------------------------------------------------------------------------------------------------------------------------------------------------------------------------------------------------------------------------------------------------------------------------------------------------------------------------------------------------------------------------------------------------------------------------------------------------------------------------------------------------------------------------------------------------------------------------------------------------------------------------------------------------------------------------------------------------------------------------------------------------------------------------------------------------------------------------------------------------------------------------------------------------------------------------------------------------------------------------------------------------------------------------------------------------------------------------------------------------------------------------------------------------------------------------------------------------------------------------------------|

|       |                  |                           |                                       |          |       |                                                                                                                                                                                                                                                                                                                                                                                                                                                                                                                                                                  |
|-------|------------------|---------------------------|---------------------------------------|----------|-------|------------------------------------------------------------------------------------------------------------------------------------------------------------------------------------------------------------------------------------------------------------------------------------------------------------------------------------------------------------------------------------------------------------------------------------------------------------------------------------------------------------------------------------------------------------------|
|       |                  |                           |                                       |          |       | 1410C_A:CR_01700C_A:CR_01780W_A:CR_02030C_A:CR_02420W_A:RPC19:DBP2:CR_02890C_A:SRP40:CR_03230W_A:CR_03360W_A:KTI12:NCS2:YVH1:IFF3:SGD1:PRP42:CR_03760W_A:CR_03940W_A:MEX67:CR_04110W_A:CR_04170W_A:CR_04240C_A:NHP2:RBR2:CR_04920W_A:NOC2:CR_05550C_A:RNR3:MTG2:DBP8:SDA1:VP S75:SFL1:RPL7:FGR50:RGS2:CR_06680C_A:NMD3:CR_06840W_A:CR_07030C_A:CR_07080W_A:CR_07640C_A:DBP6:IMP4:CR_08000C_A:NOP10:SSB1:RIO2:CR_08130W_A:HSP104:ATS1:CR_08330W_A:TSR1:CR_08500W_A:PRP8:CR_09110C_A:CR_09140C_A:ELF1:SSF1:CR_09800C_A:SIK1:UTP5:CR_10410C_A:CR_10470C_A:DRS1:POP3 |
| 30488 | tRNA methylation | 17 out of 804 genes, 2.1% | 21 out of 6473 background genes, 0.3% | 1.73E-09 | 0.00% | C1_01150C_A:ABP140:C2_06480W_A:C2_08840W_A:C3_05140C_A:C3_07400W_A:C4_03730C_A:C4_03830W_A:C4_04810C_A:C6_04530C_A:C7_02340C_A:CR_00670C_A:TRM1:CR_04160C_A:CR_04300W_A:TRM9:CR_08940W_A                                                                                                                                                                                                                                                                                                                                                                         |

|           |                                   |                                   |                                                       |          |       |                                                                                                                                                                                                                                                                                                                                                                                                                                                                                                                                                                                                                                                                                                                                                                                                                                                                                                                                                                                                                                                                                                                                                                                                                                                                                                                                                                                                                                                                                                                                                                                                                                                                                                                                                                                                                                                                                                                                                                                                                                                                                                                                                                                                                                                                                                                                                                                                                                                                                                                                                                                                                                                                                                                                                                                                                              |
|-----------|-----------------------------------|-----------------------------------|-------------------------------------------------------|----------|-------|------------------------------------------------------------------------------------------------------------------------------------------------------------------------------------------------------------------------------------------------------------------------------------------------------------------------------------------------------------------------------------------------------------------------------------------------------------------------------------------------------------------------------------------------------------------------------------------------------------------------------------------------------------------------------------------------------------------------------------------------------------------------------------------------------------------------------------------------------------------------------------------------------------------------------------------------------------------------------------------------------------------------------------------------------------------------------------------------------------------------------------------------------------------------------------------------------------------------------------------------------------------------------------------------------------------------------------------------------------------------------------------------------------------------------------------------------------------------------------------------------------------------------------------------------------------------------------------------------------------------------------------------------------------------------------------------------------------------------------------------------------------------------------------------------------------------------------------------------------------------------------------------------------------------------------------------------------------------------------------------------------------------------------------------------------------------------------------------------------------------------------------------------------------------------------------------------------------------------------------------------------------------------------------------------------------------------------------------------------------------------------------------------------------------------------------------------------------------------------------------------------------------------------------------------------------------------------------------------------------------------------------------------------------------------------------------------------------------------------------------------------------------------------------------------------------------------|
| 4423<br>7 | cellular<br>metaboli<br>c process | 544 out of<br>804 genes,<br>67.7% | 3715 out of<br>6473<br>backgroun<br>d genes,<br>57.4% | 1.68E-07 | 0.00% | RIM8:PHR2:HBR1:GLO1:C1_00510W_A:C1_00520W_A:CIS2:CNS1:RRS1:NMA111:H<br>MT1:C1_01150C_A:C1_01160C_A:C1_01470W_A:SOD2:C1_01530C_A:C1_01900C_<br>A:C1_02090C_A:ABP140:C1_02310C_A:C1_02430C_A:C1_02440C_A:C1_02450C_A:<br>HOM6:PDE2:MIA40:ATG17:TSR2:RPL6:ARO80:MAS1:C1_03370W_A:EHT1:C1_0343<br>0W_A:C1_03790C_A:C1_03830C_A:C1_04040C_A:C1_04120C_A:ERB1:RPN4:NOP4:<br>C1_04990C_A:RHD1:RRP6:C1_05220C_A:C1_05230W_A:C1_05360C_A:RPS27A:RIB<br>4:C1_05630C_A:FAL1:C1_05650W_A:NPL4:C1_06120C_A:C1_06540C_A:ANT1:NOP<br>6:C1_06760C_A:C1_06770W_A:MRPL19:C1_06800W_A:CAT1:C1_06910C_A:SUI2:C<br>1_07090C_A:RIA1:YMC1:YPD1:PEX3:LHP1:C1_07510W_A:C1_07570C_A:ADE4:GCS1<br>:ADE5,7:C1_07950C_A:FUN12:DRG1:GCD6:C1_08630W_A:MSS116:C1_09060C_A:C<br>1_09390W_A:FTH1:C1_09440W_A:GUA1:C1_09610W_A:C1_09710C_A:DBP3:TPK1:<br>C1_10340W_A:GLY1:C1_10620W_A:HNT1:C1_10970W_A:C1_11000C_A:C1_11010<br>C_A:C1_11370C_A:KRR1:GAR1:C1_11560C_A:GAD1:MRF1:C1_11900C_A:C1_11910<br>W_A:CSI2:C1_12350W_A:PKH2:C1_12440W_A:C1_12570C_A:CHR1:C1_12670C_A:C<br>1_12760W_A:C1_13260W_A:C1_13270W_A:C1_13330C_A:AGC1:KNS1:HSP70:MET<br>3:MODF:SIM1:C1_14080W_A:FTR1:MPP10:FAV3:NDT80:HMA1:C2_00220C_A:C2_0<br>0280C_A:C2_00410C_A:C2_00810C_A:C2_00880W_A:MXR1:C2_01070W_A:C2_015<br>10C_A:C2_01870C_A:ZCF6:C2_01920C_A:C2_02420C_A:PRS1:C2_02540W_A:SER2:<br>C2_02710C_A:HPT1:LIG4:ADE8:PRP3:C2_03360W_A:C2_03550C_A:MNN42:C2_039<br>10C_A:SCH9:GCD7:C2_04120C_A:UGA1:BAT21:C2_04570W_A:SNU114:C2_04820W<br>_A:CRK1:C2_05080C_A:MAK5:ERF1:PEX2:C2_05160C_A:RPF2:RPC40:PEX6:C2_0552<br>0W_A:KTI11:TES1:LAS1:CNT:ECM17:IMH3:RTA2:C2_06480W_A:RPL11:C2_06850W<br>_A:SPE3:RCK2:C2_07140W_A:RPA12:NOC4:C2_07360W_A:SSC1:C2_07410W_A:RCL<br>1:RNR22:C2_07610C_A:PRS5:C2_07920W_A:NSA1:ORF298:C2_08460C_A:RRP8:TIF<br>4631:RPT6:SPO11:C2_08840W_A:FPK1:C2_09070C_A:MET10:SLP2:GLO2:PES1:RRP1<br>5:C2_09500W_A:C2_09660W_A:LEU42:FCY21:YOR1:CWC22:OCA1:GPD1:PUS7:MTR<br>2:TIF11:C2_10740C_A:RPC11:C2_10810W_A:C3_00100W_A:UTP8:BUD21:DOT5:SO<br>F1:MIH1:C3_00950C_A:BMS1:URA3:C3_01520C_A:C3_01560W_A:C3_02020W_A:C<br>3_02030W_A:C3_02040C_A:UTP4:C3_02180C_A:C3_02350W_A:PHA2:C3_03070W<br>_A:C3_03330C_A:BMT7:C3_03470W_A:HBR3:C3_03680W_A:SAP9:CSC25:AGT1:UR<br>K1:C3_04370C_A:C3_04380C_A:ADE2:MAK21:RPP2B:SFP1:CEM1:C3_05140C_A:C3_<br>05160C_A:WOR2:SAP3:C3_05380W_A:C3_05510W_A:QDR2:BAT22:C3_05800W_A:<br>C3_05860C_A:CTA4:NOG1:ELP3:DED1:C3_06150W_A:HNT2:C3_06370C_A:NSA2:PR<br>P5:C3_06760W_A:C3_06830C_A:C3_06940W_A:C3_07100C_A:NOP13:C3_07400W<br>_A:C3_07430W_A:C3_07480W_A:C3_07550C_A:RIT1:C3_07670W_A:UTP9:CAR2:D<br>UR4:C4_00490W_A:RLP24:NMD5:C4_00690C_A:C4_00700C_A:C4_00810C_A:C4_0<br>0940W_A:MDN1:DAG7:RAT1:C4_01280C_A:PWP1:NIP1:C4_01670C_A:TOA2:HGH1:<br>C4_02850W_A:ZUO1:C4_02880C_A:C4_03040W_A:C4_03150W_A:C4_03720C_A:C |
|-----------|-----------------------------------|-----------------------------------|-------------------------------------------------------|----------|-------|------------------------------------------------------------------------------------------------------------------------------------------------------------------------------------------------------------------------------------------------------------------------------------------------------------------------------------------------------------------------------------------------------------------------------------------------------------------------------------------------------------------------------------------------------------------------------------------------------------------------------------------------------------------------------------------------------------------------------------------------------------------------------------------------------------------------------------------------------------------------------------------------------------------------------------------------------------------------------------------------------------------------------------------------------------------------------------------------------------------------------------------------------------------------------------------------------------------------------------------------------------------------------------------------------------------------------------------------------------------------------------------------------------------------------------------------------------------------------------------------------------------------------------------------------------------------------------------------------------------------------------------------------------------------------------------------------------------------------------------------------------------------------------------------------------------------------------------------------------------------------------------------------------------------------------------------------------------------------------------------------------------------------------------------------------------------------------------------------------------------------------------------------------------------------------------------------------------------------------------------------------------------------------------------------------------------------------------------------------------------------------------------------------------------------------------------------------------------------------------------------------------------------------------------------------------------------------------------------------------------------------------------------------------------------------------------------------------------------------------------------------------------------------------------------------------------------|

|  |  |  |  |  |                                                                                                                                                                                                                                                                                                                                                                                                                                                                                                                                                                                                                                                                                                                                                                                                                                                                                                                                                                                                                                                                                                                                                                                                                                                                                                                                                                                                                                                                                                                                                                                                                                                                                                                                                                                                                                                                                                                                                                                                                      |
|--|--|--|--|--|----------------------------------------------------------------------------------------------------------------------------------------------------------------------------------------------------------------------------------------------------------------------------------------------------------------------------------------------------------------------------------------------------------------------------------------------------------------------------------------------------------------------------------------------------------------------------------------------------------------------------------------------------------------------------------------------------------------------------------------------------------------------------------------------------------------------------------------------------------------------------------------------------------------------------------------------------------------------------------------------------------------------------------------------------------------------------------------------------------------------------------------------------------------------------------------------------------------------------------------------------------------------------------------------------------------------------------------------------------------------------------------------------------------------------------------------------------------------------------------------------------------------------------------------------------------------------------------------------------------------------------------------------------------------------------------------------------------------------------------------------------------------------------------------------------------------------------------------------------------------------------------------------------------------------------------------------------------------------------------------------------------------|
|  |  |  |  |  | 4_03730C_A:C4_03740W_A:C4_03830W_A:RRP42:RAM1:C4_04090C_A:ECM1:C4_04270W_A:C4_04510W_A:SSZ1:C4_04720W_A:C4_04810C_A:AGP3:MYO5:NBP35:C4_05260W_A:C4_05650W_A:C4_06210C_A:C4_06410W_A:MNN4:NOP1:C4_06790W_A:MNN46:MET16:YDC1:C4_07060W_A:C4_07100C_A:C4_07140W_A:VIP1:C5_00260W_A:C5_00280C_A:DUS4:RMT2:URA4:C5_00920W_A:C5_00950C_A:BUD23:PUS4:C5_01430C_A:FYV5:SPB4:C5_01610W_A:MAS2:GIS2:C5_01930W_A:RIB2:C5_02010C_A:C5_02070C_A:RIX7:GCD11:ZCF22:TIF5:UTP13:C5_02730C_A:C5_03010W_A:RMS1:RPO26:FUR1:C5_03530C_A:C5_03550W_A:C5_03670C_A:FGR27:HAM1:C5_03920C_A:C5_03970W_A:URA7:CSU57:C5_04610W_A:HAS1:C5_04990W_A:PCL5:C5_05340W_A:NOP5:FET31:C6_00530C_A:C6_00640C_A:HAL21:AEP1:C6_01040C_A:RCN1:CIC1:C6_01300W_A:ACF2:C6_01890C_A:C6_01980C_A:C6_02230W_A:C6_02350C_A:NIP7:C6_02410W_A:C6_02420W_A:GCV1:C6_02560W_A:MOB1:SAC6:MR4:POP4:EMF1:C6_03210C_A:BMT4:C6_03330C_A:C6_03390W_A:FGR17:PAD1:AL55:SBA1:SHM2:SNQ2:SPB1:C6_04530C_A:C7_00160C_A:C7_00330C_A:C7_00380W_A:C7_00490C_A:RPA135:NOP15:C7_01030C_A:DBP7:GCN3:C7_01360C_A:FLU1:RAD14:C7_02100W_A:C7_02340C_A:C7_02460C_A:PEX1:C7_02930C_A:ZCF29:CPY1:ISY1:ENP2:MAM33:C7_03990C_A:C7_04140C_A:UTP18:MIS12:CR_00460C_A:PHO81:CR_00670C_A:BUD22:BMT3:PWP2:TRM1:CAB3:CR_01410C_A:CR_01700C_A:CR_01780W_A:CR_01950W_A:CR_02030C_A:CR_02420W_A:CR_02430C_A:CR_02460W_A:CR_02510W_A:RPC19:DBP2:RPC31:CR_02890C_A:SRP40:CR_03110W_A:CR_03230W_A:CR_03360W_A:KTI12:NCS2:YVH1:IFF3:SGD1:PRP42:CR_03940W_A:GCD1:MEX67:CR_04110W_A:CR_04160C_A:CR_04170W_A:CR_04240C_A:CR_04300W_A:NHP2:ADE6:RPB8:CR_04920W_A:NOC2:CR_05550C_A:RNR3:MTG2:DBP8:VPS75:SFL1:SOX1:RPL7:FGR50:RGS2:CR_06680C_A:NMD3:CR_06840W_A:CR_06980W_A:CR_07030C_A:CR_07080W_A:CR_07470W_A:CR_07640C_A:DBP6:CR_07780W_A:IMP4:CR_08000C_A:NOP10:SSB1:RIO2:CR_08130W_A:TRM9:HSP104:ATS1:CR_08330W_A:CY3:GSH2:TSR1:PRP8:CR_08940W_A:CR_09110C_A:CR_09140C_A:ELF1:CR_09670C_A:SSF1:CR_09800C_A:SIK1:UGA3:CR_09990W_A:CR_10170C_A:UTP5:AHA1:CR_10400W_A:CR_10410C_A:CR_10430C_A:CR_10470C_A:DRS1:POP3 |
|--|--|--|--|--|----------------------------------------------------------------------------------------------------------------------------------------------------------------------------------------------------------------------------------------------------------------------------------------------------------------------------------------------------------------------------------------------------------------------------------------------------------------------------------------------------------------------------------------------------------------------------------------------------------------------------------------------------------------------------------------------------------------------------------------------------------------------------------------------------------------------------------------------------------------------------------------------------------------------------------------------------------------------------------------------------------------------------------------------------------------------------------------------------------------------------------------------------------------------------------------------------------------------------------------------------------------------------------------------------------------------------------------------------------------------------------------------------------------------------------------------------------------------------------------------------------------------------------------------------------------------------------------------------------------------------------------------------------------------------------------------------------------------------------------------------------------------------------------------------------------------------------------------------------------------------------------------------------------------------------------------------------------------------------------------------------------------|

|       |                                     |                             |                                        |          |       |                                                                                                                                                                                                                                                                                                                                                                                                                                                                                                                                                                                                                                                                                                                                                                                                                                                                                   |
|-------|-------------------------------------|-----------------------------|----------------------------------------|----------|-------|-----------------------------------------------------------------------------------------------------------------------------------------------------------------------------------------------------------------------------------------------------------------------------------------------------------------------------------------------------------------------------------------------------------------------------------------------------------------------------------------------------------------------------------------------------------------------------------------------------------------------------------------------------------------------------------------------------------------------------------------------------------------------------------------------------------------------------------------------------------------------------------|
| 65003 | protein-containing complex assembly | 101 out of 804 genes, 12.6% | 444 out of 6473 background genes, 6.9% | 3.24E-07 | 0.00% | RPL6:C1_03790C_A:C1_04040C_A:C1_04120C_A:ERB1:NOP4:RRP6:C1_05360C_A:RPS27A:C1_06760C_A:SUI2:FUN12:JIP5:C1_09710C_A:C1_10970W_A:CSI2:C1_12440W_A:C1_12760W_A:C1_14080W_A:SAM35:C2_00280C_A:C2_01070W_A:C2_02540W_A:C2_02710C_A:PRP3:SNU114:MAK5:C2_05160C_A:RPF2:RPL11:RPT6:TIF11:C2_10740C_A:C3_00100W_A:BMS1:C3_01560W_A:C3_02020W_A:C3_02040C_A:C3_02350W_A:C3_03330C_A:HBR3:C3_04370C_A:MAK21:C3_05160C_A:QDR2:NOG1:C3_06370C_A:PRP5:C3_07480W_A:RLP24:MDN1:TOA2:C4_03150W_A:C4_05010W_A:C4_06410W_A:C4_07100C_A:RMT2:SPB4:C5_01930W_A:C5_02010C_A:C5_02070C_A:GCD11:TIF5:HAS1:C5_05340W_A:CIC1:C6_02230W_A:NIP7:MOB1:SPB1:RPA135:DBP7:FLU1:ISY1:ENP2:UTP18:BUD22:PWP2:CR_01410C_A:CR_01700C_A:DBP2:YVH1:SGD1:CR_03940W_A:CR_04110W_A:CR_04170W_A:NOC2:CR_05550C_A:SDA1:VPS75:CR_06680C_A:CR_07080W_A:CR_08130W_A:TSR1:PRP8:ELF1:SSF1:CR_09800C_A:CR_10410C_A:CR_10470C_A:DRS1 |
|-------|-------------------------------------|-----------------------------|----------------------------------------|----------|-------|-----------------------------------------------------------------------------------------------------------------------------------------------------------------------------------------------------------------------------------------------------------------------------------------------------------------------------------------------------------------------------------------------------------------------------------------------------------------------------------------------------------------------------------------------------------------------------------------------------------------------------------------------------------------------------------------------------------------------------------------------------------------------------------------------------------------------------------------------------------------------------------|

|      |                   |                             |                                          |          |       |                                                                                                                                                                                                                                                                                                                                                                                                                                                                                                                                                                                                                                                                                                                                                                                                                                                                                                                                                                                                                                                                                                                                                                                                                                                                                                                                                                                                                                                                                                                                                                                                                                                                                                                                                                                                                                                                                                                                                                                                                                                                                                                                                                                                                                                                                                                                                                                                                                                                                                                                                                                                                             |
|------|-------------------|-----------------------------|------------------------------------------|----------|-------|-----------------------------------------------------------------------------------------------------------------------------------------------------------------------------------------------------------------------------------------------------------------------------------------------------------------------------------------------------------------------------------------------------------------------------------------------------------------------------------------------------------------------------------------------------------------------------------------------------------------------------------------------------------------------------------------------------------------------------------------------------------------------------------------------------------------------------------------------------------------------------------------------------------------------------------------------------------------------------------------------------------------------------------------------------------------------------------------------------------------------------------------------------------------------------------------------------------------------------------------------------------------------------------------------------------------------------------------------------------------------------------------------------------------------------------------------------------------------------------------------------------------------------------------------------------------------------------------------------------------------------------------------------------------------------------------------------------------------------------------------------------------------------------------------------------------------------------------------------------------------------------------------------------------------------------------------------------------------------------------------------------------------------------------------------------------------------------------------------------------------------------------------------------------------------------------------------------------------------------------------------------------------------------------------------------------------------------------------------------------------------------------------------------------------------------------------------------------------------------------------------------------------------------------------------------------------------------------------------------------------------|
| 8152 | metabolic process | 604 out of 804 genes, 75.1% | 4250 out of 6473 background genes, 65.7% | 5.81E-07 | 0.00% | <p>RIM8:PHR2:HBR1:GLO1:C1_00510W_A:C1_00520W_A:CIS2:CNS1:RRS1:NMA111:HMT1:C1_01130W_A:C1_01150C_A:C1_01160C_A:C1_01470W_A:SOD2:C1_01530C_A:C1_01900C_A:C1_02090C_A:ABP140:C1_02310C_A:C1_02430C_A:C1_02440C_A:C1_02450C_A:HOM6:PDE2:MIA40:ATG17:TSR2:RPL6:ARO80:MAS1:C1_03370W_A:EHT1:C1_03430W_A:C1_03790C_A:C1_03830C_A:C1_04040C_A:C1_04120C_A:ERB1:RPN4:NOP4:C1_04990C_A:RHD1:RRP6:C1_05220C_A:C1_05230W_A:C1_05330C_A:C1_05360C_A:RPS27A:RIB4:C1_05630C_A:FAL1:C1_05650W_A:C1_05930C_A:NPL4:C1_06120C_A:C1_06540C_A:ANT1:NOP6:C1_06760C_A:C1_06770W_A:MRPL19:C1_06800W_A:CAT1:C1_06910C_A:SUI2:C1_07090C_A:RIA1:YMC1:YPD1:RME1:C1_07390W_A:PEX3:LHP1:C1_07510W_A:C1_07570C_A:ADE4:GCS1:ADE5,7:C1_07950C_A:FUN12:DRG1:GCD6:C1_08630W_A:MSS116:C1_09060C_A:C1_09390W_A:FTH1:C1_09440W_A:GUA1:C1_09610W_A:C1_09710C_A:DBP3:TPK1:C1_10340W_A:C1_10410W_A:GLY1:C1_10620W_A:HNT1:C1_10970W_A:C1_11000C_A:C1_11010C_A:C1_11370C_A:KRR1:GAR1:C1_11560C_A:GAD1:MRF1:C1_11900C_A:C1_11910W_A:CSI2:C1_12350W_A:PKH2:C1_12440W_A:C1_12570C_A:CHR1:C1_12670C_A:C1_12760W_A:RBK1:PSA2:C1_13260W_A:C1_13270W_A:C1_13330C_A:AGC1:KNS1:HSP70:MET3:MODF:SIM1:C1_14080W_A:FTR1:C1_14160W_A:SAM35:MPP10:FAV3:NDT80:HMA1:C2_00220C_A:C2_00280C_A:C2_00410C_A:C2_00620C_A:C2_00810C_A:C2_00880W_A:MXR1:C2_01060C_A:C2_01070W_A:CLB2:C2_01510C_A:C2_01870C_A:ZCF6:C2_01920C_A:C2_02420C_A:PRS1:C2_02540W_A:FGR22:SER2:C2_02710C_A:HPT1:C2_02960C_A:LIG4:PLC2:ADE8:C2_03130W_A:PRP3:C2_03360W_A:C2_03550C_A:MNN42:C2_03700W_A:C2_03830W_A:C2_03910C_A:SCH9:GCD7:C2_04120C_A:UGA1:BAT21:C2_04570W_A:SNU114:C2_04820W_A:CRK1:C2_05080C_A:MAK5:ERF1:PEX2:C2_05160C_A:RPF2:RPC40:PEX6:C2_05520W_A:KTI11:PNG2:TES1:LAS1:CNT:FAA2-1:ECM17:IMH3:RTA2:C2_06480W_A:AMO2:RPL11:C2_06850W_A:C2_06890C_A:SP-E3:C2_07070W_A:RCK2:C2_07140W_A:RPA12:NOC4:C2_07360W_A:SSC1:C2_07410W_A:RCL1:RNR22:C2_07610C_A:PRS5:C2_07920W_A:NSA1:C2_08200W_A:ORF298:C2_08460C_A:RRP8:C2_08620W_A:TIF4631:RPT6:SPO11:C2_08840W_A:FPK1:C2_09070C_A:MET10:SLP2:GLO2:PES1:RRP15:C2_09500W_A:C2_09660W_A:LEU42:C2_09930W_A:FCY21:YOR1:CWC22:OCA1:GPD1:PUS7:MTR2:TIF11:C2_10740C_A:RPC11:C2_10810W_A:C3_00100W_A:UTP8:BUD21:DOT5:SOF1:MIH1:C3_00950C_A:BMS1:URA3:C3_01520C_A:C3_01560W_A:C3_02020W_A:C3_02030W_A:C3_02040C_A:UTP4:C3_02180C_A:C3_02350W_A:PHA2:C3_03070W_A:C3_03330C_A:BMT7:C3_03470W_A:ULP1:HBR3:C3_03680W_A:SAP9:CSC25:AGT1:URK1:C3_04370C_A:C3_04380C_A:ADE2:MAK21:RPP2B:SFP1:CEM1:C3_05140C_A:C3_05160C_A:WOR2:SAP3:C3_05380W_A:C3_05510W_A:QDR2:BAT22:C3_05790C_A:C3_05800W_A:C3_05860C_A:CTA4:FAA2:NOG1:ELP3:DED1:C3_06150W_A:CYM1:HNT2:C3_06370C_A:NS</p> |
|------|-------------------|-----------------------------|------------------------------------------|----------|-------|-----------------------------------------------------------------------------------------------------------------------------------------------------------------------------------------------------------------------------------------------------------------------------------------------------------------------------------------------------------------------------------------------------------------------------------------------------------------------------------------------------------------------------------------------------------------------------------------------------------------------------------------------------------------------------------------------------------------------------------------------------------------------------------------------------------------------------------------------------------------------------------------------------------------------------------------------------------------------------------------------------------------------------------------------------------------------------------------------------------------------------------------------------------------------------------------------------------------------------------------------------------------------------------------------------------------------------------------------------------------------------------------------------------------------------------------------------------------------------------------------------------------------------------------------------------------------------------------------------------------------------------------------------------------------------------------------------------------------------------------------------------------------------------------------------------------------------------------------------------------------------------------------------------------------------------------------------------------------------------------------------------------------------------------------------------------------------------------------------------------------------------------------------------------------------------------------------------------------------------------------------------------------------------------------------------------------------------------------------------------------------------------------------------------------------------------------------------------------------------------------------------------------------------------------------------------------------------------------------------------------------|

|  |  |  |  |  |  |                                                                                                                                                                                                                                                                                                                                                                                                                                                                                                                                                                                                                                                                                                                                                                                                                                                                                                                                                                                                                                                                                                                                                                                                                                                                                                                                                                                                                                                                                                                                                                                                                                                                                                                                                                                                                                                                                                                                                                                                                                                                                                                                                                                                                                                                                                                                                                                                                                                                                                                                                                                                                                                                                                                                                                                         |
|--|--|--|--|--|--|-----------------------------------------------------------------------------------------------------------------------------------------------------------------------------------------------------------------------------------------------------------------------------------------------------------------------------------------------------------------------------------------------------------------------------------------------------------------------------------------------------------------------------------------------------------------------------------------------------------------------------------------------------------------------------------------------------------------------------------------------------------------------------------------------------------------------------------------------------------------------------------------------------------------------------------------------------------------------------------------------------------------------------------------------------------------------------------------------------------------------------------------------------------------------------------------------------------------------------------------------------------------------------------------------------------------------------------------------------------------------------------------------------------------------------------------------------------------------------------------------------------------------------------------------------------------------------------------------------------------------------------------------------------------------------------------------------------------------------------------------------------------------------------------------------------------------------------------------------------------------------------------------------------------------------------------------------------------------------------------------------------------------------------------------------------------------------------------------------------------------------------------------------------------------------------------------------------------------------------------------------------------------------------------------------------------------------------------------------------------------------------------------------------------------------------------------------------------------------------------------------------------------------------------------------------------------------------------------------------------------------------------------------------------------------------------------------------------------------------------------------------------------------------------|
|  |  |  |  |  |  | A2:PRP5:C3_06760W_A:C3_06830C_A:C3_06860C_A:C3_06940W_A:C3_07100C_A:<br>NOP13:GCV1:C3_07380W_A:C3_07400W_A:C3_07430W_A:C3_07480W_A:C3_075<br>50C_A:RIT1:C3_07670W_A:UTP9:CAR2:DUR4:C4_00490W_A:RLP24:NMD5:C4_0069<br>0C_A:C4_00700C_A:C4_00810C_A:C4_00940W_A:MDN1:DAG7:RAT1:C4_01280C_A<br>:PWP1:C4_01470W_A:NIP1:C4_01670C_A:TOA2:HGHI:HOS3:C4_02620C_A:C4_028<br>50W_A:ZUO1:C4_02880C_A:C4_03040W_A:C4_03050C_A:C4_03150W_A:C4_0372<br>0C_A:C4_03730C_A:C4_03740W_A:C4_03830W_A:RRP42:RAM1:C4_04090C_A:EC<br>M1:C4_04270W_A:SAP10:C4_04500C_A:C4_04510W_A:OMA1:SSZ1:C4_04720W_A<br>:C4_04810C_A:AGP3:MYO5:NBP35:C4_05260W_A:C4_05650W_A:C4_06210C_A:SO<br>U1:C4_06410W_A:MNN4:NOP1:C4_06790W_A:MNN46:MET16:YDC1:C4_07060W_<br>A:C4_07100C_A:C4_07140W_A:VIP1:C5_00260W_A:C5_00280C_A:DUS4:RMT2:UR<br>A4:TRX2:C5_00920W_A:C5_00950C_A:BUD23:PUS4:C5_01430C_A:FYV5:GLR1:SPB4<br>:C5_01610W_A:MAS2:GIS2:C5_01930W_A:RIB2:C5_02010C_A:C5_02070C_A:RIX7:<br>GCD11:ZCF22:TIF5:UTP13:C5_02730C_A:C5_03010W_A:RMS1:RPO26:FUR1:C5_035<br>30C_A:C5_03550W_A:C5_03640W_A:C5_03670C_A:FGR27:C5_03700C_A:HAM1:C5<br>_03920C_A:C5_03970W_A:URA7:CSU57:C5_04610W_A:HAS1:C5_04990W_A:PCL5:<br>C5_05340W_A:PEX4:NOP5:FET31:C6_00530C_A:C6_00640C_A:C6_00760W_A:HAL<br>21:AEP1:C6_01040C_A:RCN1:CIC1:EBP1:C6_01300W_A:ACF2:C6_01870C_A:C6_018<br>90C_A:C6_01980C_A:C6_02230W_A:C6_02350C_A:NIP7:C6_02410W_A:C6_02420<br>W_A:C6_02480W_A:GCV1:C6_02560W_A:MOB1:SAC6:MRT4:POP4:EMF1:C6_0321<br>0C_A:BMT4:C6_03330C_A:C6_03390W_A:FGR17:PAD1:ALS5:SBA1:SHM2:SNQ2:SPB<br>1:C6_04530C_A:NAG1:C7_00160C_A:C7_00330C_A:C7_00380W_A:C7_00490C_A:R<br>PA135:NOP15:C7_01030C_A:DBP7:GCN3:C7_01360C_A:FLU1:RAD14:C7_02100W_<br>A:YCF1:C7_02340C_A:C7_02460C_A:PEX1:C7_02930C_A:ZCF29:CPY1:ISY1:ENP2:MA<br>M33:C7_03990C_A:C7_04140C_A:UTP18:MIS12:CR_00460C_A:PHO81:CR_00670C_<br>A:BUD22:BMT3:PWP2:TRM1:CAB3:CR_01410C_A:CR_01700C_A:CR_01780W_A:CR<br>_01950W_A:CR_02030C_A:CR_02420W_A:CR_02430C_A:CR_02460W_A:CR_02510<br>W_A:RPC19:DBP2:RPC31:CR_02890C_A:AQY1:SRP40:CR_03110W_A:CR_03230W_A<br>:CR_03360W_A:KTI12:NCS2:YVH1:IFF3:SGD1:PRP42:CR_03760W_A:CR_03940W_A:<br>GCD1:MEX67:CR_04110W_A:CR_04160C_A:CR_04170W_A:CR_04240C_A:CR_0430<br>0W_A:NHP2:RBR2:ADE6:RPB8:CR_04920W_A:YCP4:NOC2:CR_05550C_A:RNR3:MT<br>G2:DBP8:VPS75:SFL1:SOK1:RPL7:FGR50:RGS2:CR_06680C_A:NMD3:CR_06840W_A:<br>CR_06980W_A:CR_07030C_A:CR_07080W_A:CR_07470W_A:CR_07480W_A:CR_07<br>640C_A:DBP6:CR_07780W_A:IMP4:CR_08000C_A:NOP10:SSB1:RIO2:CR_08130W_<br>A:TRM9:HSP104:ATS1:CR_08330W_A:CYS3:GSH2:TSR1:PRP8:CR_08920W_A:CR_08<br>940W_A:CR_09110C_A:CR_09140C_A:CR_09310W_A:ELF1:CR_09670C_A:SSF1:CR_<br>09800C_A:SIK1:UGA3:CR_09990W_A:CR_10170C_A:UTP5:AHA1:CR_10400W_A:CR<br>_10410C_A:CR_10430C_A:CR_10470C_A:DRS1:POP3 |
|--|--|--|--|--|--|-----------------------------------------------------------------------------------------------------------------------------------------------------------------------------------------------------------------------------------------------------------------------------------------------------------------------------------------------------------------------------------------------------------------------------------------------------------------------------------------------------------------------------------------------------------------------------------------------------------------------------------------------------------------------------------------------------------------------------------------------------------------------------------------------------------------------------------------------------------------------------------------------------------------------------------------------------------------------------------------------------------------------------------------------------------------------------------------------------------------------------------------------------------------------------------------------------------------------------------------------------------------------------------------------------------------------------------------------------------------------------------------------------------------------------------------------------------------------------------------------------------------------------------------------------------------------------------------------------------------------------------------------------------------------------------------------------------------------------------------------------------------------------------------------------------------------------------------------------------------------------------------------------------------------------------------------------------------------------------------------------------------------------------------------------------------------------------------------------------------------------------------------------------------------------------------------------------------------------------------------------------------------------------------------------------------------------------------------------------------------------------------------------------------------------------------------------------------------------------------------------------------------------------------------------------------------------------------------------------------------------------------------------------------------------------------------------------------------------------------------------------------------------------------|



|      |                                                                                                                                                  |                           |                                        |          |       |                                                                                                                                                                                                                                                                                                                        |
|------|--------------------------------------------------------------------------------------------------------------------------------------------------|---------------------------|----------------------------------------|----------|-------|------------------------------------------------------------------------------------------------------------------------------------------------------------------------------------------------------------------------------------------------------------------------------------------------------------------------|
| 154  | rRNA modification                                                                                                                                | 15 out of 804 genes, 1.9% | 21 out of 6473 background genes, 0.3%  | 8.30E-07 | 0.00% | C1_10620W_A:C2_04820W_A:RRP8:C2_08840W_A:PUS7:C3_05860C_A:NOP1:BUD23:SPB1:CR_01780W_A:CR_02030C_A:CR_04170W_A:CR_04240C_A:NHP2:NOP10                                                                                                                                                                                   |
| 1522 | pseudouridine synthesis                                                                                                                          | 11 out of 804 genes, 1.4% | 12 out of 6473 background genes, 0.2%  | 1.50E-06 | 0.00% | C1_07570C_A:C1_10620W_A:GAR1:PUS7:PUS4:C5_01610W_A:RIB2:C6_02350C_A:CR_04110W_A:NHP2:NOP10                                                                                                                                                                                                                             |
| 447  | endonuclease cleavage in ITS1 to separate SSU-rRNA from 5.8S rRNA and LSU-rRNA from tricistronic rRNA transcript (SSU-rRNA, 5.8S rRNA, LSU-rRNA) | 36 out of 804 genes, 4.5% | 103 out of 6473 background genes, 1.6% | 3.11E-06 | 0.00% | RRS1:C1_04040C_A:C1_09710C_A:KRR1:CHR1:C1_14080W_A:MPP10:FAV3:C2_00410C_A:C2_02540W_A:NOC4:RCL1:BUD21:C3_02020W_A:C3_02040C_A:C3_02350W_A:C3_06370C_A:DUR4:C4_00490W_A:C4_00690C_A:BUD23:C5_02070C_A:UTP13:C5_03920C_A:NOP5:ALS5:UTP18:PWP2:CR_02420W_A:CR_03360W_A:DBP8:ATS1:CR_08330W_A:PRP8:CR_09800C_A:CR_10410C_A |

|       |                                          |                           |                                       |          |       |                                                                                                                                                                                                                                    |
|-------|------------------------------------------|---------------------------|---------------------------------------|----------|-------|------------------------------------------------------------------------------------------------------------------------------------------------------------------------------------------------------------------------------------|
| 42797 | tRNA transcription by RNA polymerase III | 13 out of 804 genes, 1.6% | 18 out of 6473 background genes, 0.3% | 9.93E-06 | 0.00% | C1_05230W_A:RPC40:RPC11:C4_03040W_A:C4_07060W_A:RPO26:C5_04990W_A:C6_03210C_A:RPC19:RPC31:CR_02890C_A:RPB8:CR_05550C_A                                                                                                             |
| 9304  | tRNA transcription                       | 13 out of 804 genes, 1.6% | 18 out of 6473 background genes, 0.3% | 9.93E-06 | 0.00% | C1_05230W_A:RPC40:RPC11:C4_03040W_A:C4_07060W_A:RPO26:C5_04990W_A:C6_03210C_A:RPC19:RPC31:CR_02890C_A:RPB8:CR_05550C_A                                                                                                             |
| 33750 | ribosome localization                    | 28 out of 804 genes, 3.5% | 72 out of 6473 background genes, 1.1% | 1.29E-05 | 0.00% | RRS1:C1_02450C_A:ARX1:C1_04040C_A:C1_12760W_A:C2_06850W_A:KRE30:MTR2:C3_02040C_A:SFP1:NOG1:C3_06150W_A:ZUO1:ECM1:C4_04510W_A:C4_06210C_A:C4_07100C_A:BUD23:RIX7:C6_02230W_A:MRT4:C7_04140C_A:YVH1:MEX67:SDA1:NMD3:CR_07080W_A:SSB1 |
| 54    | ribosomal subunit export from nucleus    | 28 out of 804 genes, 3.5% | 72 out of 6473 background genes, 1.1% | 1.29E-05 | 0.00% | RRS1:C1_02450C_A:ARX1:C1_04040C_A:C1_12760W_A:C2_06850W_A:KRE30:MTR2:C3_02040C_A:SFP1:NOG1:C3_06150W_A:ZUO1:ECM1:C4_04510W_A:C4_06210C_A:C4_07100C_A:BUD23:RIX7:C6_02230W_A:MRT4:C7_04140C_A:YVH1:MEX67:SDA1:NMD3:CR_07080W_A:SSB1 |

|       |                                                                                      |                           |                                        |          |       |                                                                                                                                                                                                                                                                                                                                        |
|-------|--------------------------------------------------------------------------------------|---------------------------|----------------------------------------|----------|-------|----------------------------------------------------------------------------------------------------------------------------------------------------------------------------------------------------------------------------------------------------------------------------------------------------------------------------------------|
| 2E+06 | assembly of large subunit precursor of preribosome                                   | 8 out of 804 genes, 1.0%  | 8 out of 6473 background genes, 0.1%   | 7.57E-05 | 0.00% | RPF2:C3_05160C_A:NOG1:RLP24:SPB4:NIP7:CR_04170W_A:CR_07080W_A                                                                                                                                                                                                                                                                          |
| 377   | RNA splicing, via transesterification reactions with bulged adenosine as nucleophile | 32 out of 804 genes, 4.0% | 102 out of 6473 background genes, 1.6% | 0.00043  | 0.00% | C1_02090C_A:C1_04120C_A:C1_04990C_A:MSS116:C1_12670C_A:C2_00280C_A:PRP3:SNU114:CWC22:C2_10810W_A:C3_00100W_A:C3_01560W_A:C3_03330C_A:C3_04380C_A:DED1:PRP5:C3_07480W_A:C4_01280C_A:C4_03150W_A:C4_06410W_A:C4_07100C_A:C5_00920W_A:C5_01930W_A:C5_03010W_A:C5_04610W_A:C6_00530C_A:ISY1:CR_01700C_A:CR_03230W_A:PRP42:PRP8:CR_10430C_A |
| 17183 | protein histidyl modification to diphthamide                                         | 8 out of 804 genes, 1.0%  | 9 out of 6473 background genes, 0.1%   | 0.0006   | 0.00% | C2_01060C_A:C2_03830W_A:KTI11:C2_07920W_A:C4_00490W_A:C4_00690C_A:C5_03640W_A:C5_03700C_A                                                                                                                                                                                                                                              |
| 31120 | snRNA pseudouridine synthesis                                                        | 7 out of 804 genes, 0.9%  | 7 out of 6473 background genes, 0.1%   | 0.00061  | 0.00% | C1_10620W_A:GAR1:PUS7:C6_02350C_A:CR_04110W_A:NHP2:NOP10                                                                                                                                                                                                                                                                               |

|       |                                |                           |                                        |         |       |                                                                                                                                                                                                                                                                                                                                                                                                                                                                                                                                                                         |
|-------|--------------------------------|---------------------------|----------------------------------------|---------|-------|-------------------------------------------------------------------------------------------------------------------------------------------------------------------------------------------------------------------------------------------------------------------------------------------------------------------------------------------------------------------------------------------------------------------------------------------------------------------------------------------------------------------------------------------------------------------------|
| 398   | mRNA splicing, via spliceosome | 31 out of 804 genes, 3.9% | 101 out of 6473 background genes, 1.6% | 0.00114 | 0.00% | C1_02090C_A:C1_04120C_A:C1_04990C_A:C1_12670C_A:C2_00280C_A:PRP3:SNU114:CWC22:C2_10810W_A:C3_00100W_A:C3_01560W_A:C3_03330C_A:C3_04380C_A:DED1:PRP5:C3_07480W_A:C4_01280C_A:C4_03150W_A:C4_06410W_A:C4_07100C_A:C5_00920W_A:C5_01930W_A:C5_03010W_A:C5_04610W_A:C6_00530C_A:ISY1:CR_01700C_A:CR_03230W_A:PRP42:PRP8:CR_10430C_A                                                                                                                                                                                                                                         |
| 16071 | mRNA metabolic process         | 55 out of 804 genes, 6.8% | 231 out of 6473 background genes, 3.6% | 0.00115 | 0.00% | C1_01470W_A:C1_02090C_A:C1_03370W_A:C1_03830C_A:C1_04120C_A:C1_04990C_A:RRP6:C1_05360C_A:C1_06540C_A:C1_06800W_A:C1_08630W_A:C1_10620W_A:C1_11900C_A:C1_11910W_A:C1_12350W_A:C1_12670C_A:C2_00280C_A:PRP3:C2_03550C_A:SNU114:CWC22:PUS7:C2_10810W_A:C3_00100W_A:C3_01560W_A:C3_03330C_A:C3_04380C_A:DED1:PRP5:C3_07480W_A:RAT1:C4_01280C_A:C4_03150W_A:C4_03740W_A:C4_06410W_A:C4_07100C_A:C5_00920W_A:PUS4:C5_01610W_A:C5_01930W_A:C5_03010W_A:C5_04610W_A:C6_00530C_A:C6_02350C_A:MRT4:POP4:ISY1:CR_01700C_A:DBP2:CR_03230W_A:PRP42:CR_04240C_A:PRP8:CR_10430C_A:POP3 |

|       |                                                 |                           |                                        |         |       |                                                                                                                                                                                                                                                                                                                                        |
|-------|-------------------------------------------------|---------------------------|----------------------------------------|---------|-------|----------------------------------------------------------------------------------------------------------------------------------------------------------------------------------------------------------------------------------------------------------------------------------------------------------------------------------------|
| 31167 | rRNA methylation                                | 9 out of 804 genes, 1.1%  | 12 out of 6473 background genes, 0.2%  | 0.00144 | 0.00% | RRP8:C2_08840W_A:C3_05860C_A:NOP1:BUD23:SPB1:CR_01780W_A:CR_02030C_A:CR_04170W_A                                                                                                                                                                                                                                                       |
| 375   | RNA splicing, via transesterification reactions | 32 out of 804 genes, 4.0% | 107 out of 6473 background genes, 1.7% | 0.00145 | 0.00% | C1_02090C_A:C1_04120C_A:C1_04990C_A:MSS116:C1_12670C_A:C2_00280C_A:PRP3:SNU114:CWC22:C2_10810W_A:C3_00100W_A:C3_01560W_A:C3_03330C_A:C3_04380C_A:DED1:PRP5:C3_07480W_A:C4_01280C_A:C4_03150W_A:C4_06410W_A:C4_07100C_A:C5_00920W_A:C5_01930W_A:C5_03010W_A:C5_04610W_A:C6_00530C_A:ISY1:CR_01700C_A:CR_03230W_A:PRP42:PRP8:CR_10430C_A |
| 40031 | snRNA modification                              | 7 out of 804 genes, 0.9%  | 8 out of 6473 background genes, 0.1%   | 0.00438 | 0.00% | C1_10620W_A:GAR1:PUS7:C6_02350C_A:CR_04110W_A:NHP2:NOP10                                                                                                                                                                                                                                                                               |
| 31503 | protein-containing complex localization         | 28 out of 804 genes, 3.5% | 92 out of 6473 background genes, 1.4%  | 0.00469 | 0.00% | RRS1:C1_02450C_A:ARX1:C1_04040C_A:C1_12760W_A:C2_06850W_A:KRE30:MTR2:C3_02040C_A:SFP1:NOG1:C3_06150W_A:ZUO1:ECM1:C4_04510W_A:C4_06210C_A:C4_07100C_A:BUD23:RIX7:C6_02230W_A:MRT4:C7_04140C_A:YVH1:MEX67:SDA1:NMD3:CR_07080W_A:SSB1                                                                                                     |

|      |                 |                                 |                                                     |         |       |                                                                                                                                                                                                                                                                                                                                                    |
|------|-----------------|---------------------------------|-----------------------------------------------------|---------|-------|----------------------------------------------------------------------------------------------------------------------------------------------------------------------------------------------------------------------------------------------------------------------------------------------------------------------------------------------------|
| 8380 | RNA<br>splicing | 33 out of<br>804 genes,<br>4.1% | 119 out of<br>6473<br>backgroun<br>d genes,<br>1.8% | 0.00632 | 0.00% | C1_02090C_A:C1_04120C_A:C1_04990C_A:MSS116:C1_12670C_A:C2_00280C_A:PRP3:SNU114:CWC22:C2_10810W_A:C3_00100W_A:C3_01560W_A:C3_03330C_A:C3_04380C_A:C3_05800W_A:DED1:PRP5:C3_07480W_A:C4_01280C_A:C4_03150W_A:C4_06410W_A:C4_07100C_A:C5_00920W_A:C5_01930W_A:C5_03010W_A:C5_04610W_A:C6_00530C_A:ISY1:CR_01700C_A:CR_03230W_A:PRP42:PRP8:CR_10430C_A |
|------|-----------------|---------------------------------|-----------------------------------------------------|---------|-------|----------------------------------------------------------------------------------------------------------------------------------------------------------------------------------------------------------------------------------------------------------------------------------------------------------------------------------------------------|

|      |                  |                             |                                          |         |       |                                                                                                                                                                                                                                                                                                                                                                                                                                                                                                                                                                                                                                                                                                                                                                                                                                                                                                                                                                                                                                                                                                                                                                                                                                                                                                                                                                                                                                                                                                                                                                                                                                                                                                                                                                                                                                                                                                                                                                                                                                                                                                                                                                                                                                                                                                                                                                                                                                                                                                                                                                                                                                                                                 |
|------|------------------|-----------------------------|------------------------------------------|---------|-------|---------------------------------------------------------------------------------------------------------------------------------------------------------------------------------------------------------------------------------------------------------------------------------------------------------------------------------------------------------------------------------------------------------------------------------------------------------------------------------------------------------------------------------------------------------------------------------------------------------------------------------------------------------------------------------------------------------------------------------------------------------------------------------------------------------------------------------------------------------------------------------------------------------------------------------------------------------------------------------------------------------------------------------------------------------------------------------------------------------------------------------------------------------------------------------------------------------------------------------------------------------------------------------------------------------------------------------------------------------------------------------------------------------------------------------------------------------------------------------------------------------------------------------------------------------------------------------------------------------------------------------------------------------------------------------------------------------------------------------------------------------------------------------------------------------------------------------------------------------------------------------------------------------------------------------------------------------------------------------------------------------------------------------------------------------------------------------------------------------------------------------------------------------------------------------------------------------------------------------------------------------------------------------------------------------------------------------------------------------------------------------------------------------------------------------------------------------------------------------------------------------------------------------------------------------------------------------------------------------------------------------------------------------------------------------|
| 9987 | cellular process | 627 out of 804 genes, 78.0% | 4625 out of 6473 background genes, 71.5% | 0.00635 | 0.00% | RIM8:C1_00160C_A:PHR2:HBR1:GLO1:C1_00510W_A:C1_00520W_A:CIS2:CNS1:RRS1:NMA111:HMT1:CCH1:ZPR1:C1_01130W_A:C1_01150C_A:C1_01160C_A:C1_01470W_A:SOD2:C1_01530C_A:C1_01750W_A:C1_01900C_A:C1_02090C_A:ABP140:C1_02310C_A:C1_02430C_A:C1_02440C_A:C1_02450C_A:HOM6:PDE2:MIA40:ATG17:TSR2:RPL6:ARO80:ARX1:MAS1:C1_03370W_A:EHT1:C1_03430W_A:C1_03790C_A:C1_03830C_A:C1_04040C_A:C1_04120C_A:ERB1:IFD6:RPN4:C1_04340C_A:NOP4:C1_04990C_A:RHD1:RRP6:C1_05210C_A:C1_05220C_A:C1_05230W_A:C1_05330C_A:C1_05360C_A:RPS27A:RIB4:C1_05630C_A:FAL1:C1_05650W_A:C1_05930C_A:NP14:C1_06120C_A:C1_06510C_A:C1_06540C_A:ANT1:NOP6:C1_06760C_A:C1_06770W_A:MRPL19:C1_06800W_A:CAT1:C1_06910C_A:SUI2:C1_07090C_A:RIA1:YMC1:YPD1:RME1:C1_07390W_A:PEX3:LHP1:C1_07510W_A:C1_07570C_A:C1_07690C_A:ADE4:GCS1:ADE5,7:C1_07950C_A:CDR4:FUN12:DRG1:GCD6:C1_08630W_A:MSS116:JIP5:C1_09060C_A:CTA8:C1_09390W_A:FTH1:C1_09440W_A:GUA1:YTM1:C1_09610W_A:C1_09710C_A:DBP3:TPK1:C1_10340W_A:GLY1:C1_10620W_A:HNT1:C1_10970W_A:C1_11000C_A:C1_11010C_A:TIM50:C1_11370C_A:KRR1:GAR1:C1_11560C_A:GAD1:MRF1:C1_11900C_A:C1_11910W_A:CSI2:C1_12350W_A:PKH2:C1_12440W_A:C1_12570C_A:CHR1:C1_12670C_A:C1_12680W_A:C1_12760W_A:C1_13130C_A:C1_13260W_A:C1_13270W_A:C1_13330C_A:C1_13370W_A:AGC1:KNS1:HSP70:MET3:MODF:SIM1:C1_14080W_A:FTR1:SAM35:MPP10:FAV3:NDT80:HMA1:C2_00220C_A:C2_00280C_A:C2_00410C_A:C2_00810C_A:C2_00880W_A:MXR1:HGT8:C2_01070W_A:CLB2:C2_01510C_A:C2_01870C_A:ZCF6:C2_01920C_A:C2_02420C_A:PRS1:C2_02540W_A:FGR22:SER2:C2_02710C_A:HPT1:LIG4:ADE8:PRP3:C2_03360W_A:C2_03550C_A:MNN42:C2_03910C_A:SCH9:GCD7:C2_04120C_A:UGA1:BAT21:C2_04570W_A:SNU114:C2_04820W_A:CRK1:FRE9:C2_05080C_A:MAK5:ERF1:PEX2:C2_05160C_A:RPF2:RPC40:PEX6:C2_05520W_A:KTI11:C2_05810W_A:TES1:LAS1:CNT:ECM17:IMH3:RTA3:RTA2:C2_06480W_A:RPL11:C2_06850W_A:SPE3:C2_07070W_A:RCK2:C2_07140W_A:RPA12:NOC4:C2_07360W_A:SSC1:C2_07410W_A:RCL1:RNR22:C2_07610C_A:PRS5:C2_07920W_A:NSA1:KRE30:SIT1:ORF298:C2_08460C_A:RRP8:TIF4631:RPT6:SPO11:C2_08840W_A:FPK1:C2_09070C_A:MET10:SLP2:GLO2:PES1:RRP15:C2_09500W_A:C2_09660W_A:LEU42:TIM23:C2_09930W_A:FCY21:YOR1:CWC22:OCA1:GPD1:PUS7:MTR2:TIF11:C2_10740C_A:RPC11:C2_10810W_A:C3_00100W_A:UTP8:BUD21:DOT5:SOF1:MIH1:C3_00950C_A:BMS1:C3_01140W_A:URA3:C3_01520C_A:C3_01560W_A:C3_01680C_A:C3_02020W_A:C3_02030W_A:C3_02040C_A:UTP4:C3_02180C_A:C3_02350W_A:PHA2:C3_02870C_A:C3_03070W_A:C3_03330C_A:BMT7:C3_03470W_A:HBR3:C3_03680W_A:SAP9:CSC25:AGT1:URK1:C3_04370C_A:C3_04380C_A:RAS2:ADE2:MAK21:RPP2B:SFP1:CEM1:C3_05140C_A:C3_05160C_A:WOR2:SAP3:C3_05380W_A:C3_05510W_A:QDR2:BAT22:C3_05790C_A:C3_05800W_A:C3_05860C_A:CTA4:NOG1:ELP3:DED1:C3_06150W_A:HNT2:C3_06370C_A:NS |
|------|------------------|-----------------------------|------------------------------------------|---------|-------|---------------------------------------------------------------------------------------------------------------------------------------------------------------------------------------------------------------------------------------------------------------------------------------------------------------------------------------------------------------------------------------------------------------------------------------------------------------------------------------------------------------------------------------------------------------------------------------------------------------------------------------------------------------------------------------------------------------------------------------------------------------------------------------------------------------------------------------------------------------------------------------------------------------------------------------------------------------------------------------------------------------------------------------------------------------------------------------------------------------------------------------------------------------------------------------------------------------------------------------------------------------------------------------------------------------------------------------------------------------------------------------------------------------------------------------------------------------------------------------------------------------------------------------------------------------------------------------------------------------------------------------------------------------------------------------------------------------------------------------------------------------------------------------------------------------------------------------------------------------------------------------------------------------------------------------------------------------------------------------------------------------------------------------------------------------------------------------------------------------------------------------------------------------------------------------------------------------------------------------------------------------------------------------------------------------------------------------------------------------------------------------------------------------------------------------------------------------------------------------------------------------------------------------------------------------------------------------------------------------------------------------------------------------------------------|

|  |  |  |  |  |  |                                                                                                                                                                                                                                                                                                                                                                                                                                                                                                                                                                                                                                                                                                                                                                                                                                                                                                                                                                                                                                                                                                                                                                                                                                                                                                                                                                                                                                                                                                                                                                                                                                                                                                                                                                                                                                                                                                                                                                                                                                                                                                                                                                                                                                                                                                                                                                                                                                                                                                                                                                                                   |
|--|--|--|--|--|--|---------------------------------------------------------------------------------------------------------------------------------------------------------------------------------------------------------------------------------------------------------------------------------------------------------------------------------------------------------------------------------------------------------------------------------------------------------------------------------------------------------------------------------------------------------------------------------------------------------------------------------------------------------------------------------------------------------------------------------------------------------------------------------------------------------------------------------------------------------------------------------------------------------------------------------------------------------------------------------------------------------------------------------------------------------------------------------------------------------------------------------------------------------------------------------------------------------------------------------------------------------------------------------------------------------------------------------------------------------------------------------------------------------------------------------------------------------------------------------------------------------------------------------------------------------------------------------------------------------------------------------------------------------------------------------------------------------------------------------------------------------------------------------------------------------------------------------------------------------------------------------------------------------------------------------------------------------------------------------------------------------------------------------------------------------------------------------------------------------------------------------------------------------------------------------------------------------------------------------------------------------------------------------------------------------------------------------------------------------------------------------------------------------------------------------------------------------------------------------------------------------------------------------------------------------------------------------------------------|
|  |  |  |  |  |  | A2:PRP5:C3_06760W_A:C3_06830C_A:FCR1:C3_06860C_A:C3_06940W_A:C3_07100C_A:NOP13:GCY1:C3_07400W_A:C3_07430W_A:C3_07480W_A:C3_07550C_A:RIT1:C3_07670W_A:UTP9:CAR2:DUR4:C4_00490W_A:RLP24:NMD5:C4_00690C_A:C4_00700C_A:C4_00810C_A:C4_00940W_A:MDN1:DAG7:RAT1:C4_01130C_A:C4_01280C_A:PWP1:C4_01470W_A:NIP1:C4_01670C_A:TOA2:HGH1:C4_02260C_A:HOS3:C4_02720C_A:C4_02850W_A:ZUO1:C4_02880C_A:GST2:C4_03040W_A:DNF3:C4_03150W_A:C4_03720C_A:C4_03730C_A:C4_03740W_A:C4_03830W_A:RRP42:RAM1:C4_04090C_A:ECM1:C4_04270W_A:SAP10:C4_04510W_A:OMA1:SSZ1:C4_04720W_A:C4_04810C_A:AGP3:FGR10:C4_05010W_A:MYO5:NBP35:C4_05260W_A:C4_05650W_A:CFL1:C4_06210C_A:C4_06410W_A:MNN4:NOP1:C4_06790W_A:C4_06850C_A:MNN46:MET16:YDC1:C4_07060W_A:C4_07100C_A:C4_07140W_A:VIP1:C5_00260W_A:C5_00280C_A:DUS4:RMT2:URA4:TRX2:C5_00920W_A:C5_00950C_A:BUD23:PUS4:C5_01430C_A:FYV5:GLR1:SPB4:C5_01610W_A:MAS2:GIS2:C5_01930W_A:RIB2:C5_02010C_A:C5_02070C_A:RIX7:GCD11:ZCF22:TIF5:UTP13:C5_02730C_A:C5_03010W_A:RMS1:RPO26:FUR1:C5_03470C_A:C5_03530C_A:C5_03550W_A:C5_03670C_A:FGR27:HAM1:C5_03920C_A:C5_03970W_A:URA7:CSU57:C5_04610W_A:HAS1:C5_04990W_A:PCL5:C5_05340W_A:PEX4:NOP5:FET31:C6_00530C_A:SLY41:C6_00640C_A:C6_00660C_A:C6_00760W_A:HAL21:AEP1:C6_01040C_A:RCN1:CIC1:C6_01300W_A:ACF2:C6_01870C_A:C6_01890C_A:C6_01980C_A:C6_02230W_A:C6_02350C_A:NIP7:C6_02410W_A:C6_02420W_A:GCV1:C6_02560W_A:MOB1:SAC6:MRT4:POP4:C6_03180C_A:EMF1:C6_03210C_A:BMT4:C6_03330C_A:C6_03390W_A:FGR17:PAD1:ALS5:ALS9:SBA1:SHM2:SNQ2:ALS4:SPB1:ALS2:C6_04530C_A:NAG1:C7_00160C_A:C7_00330C_A:C7_00380W_A:C7_00490C_A:RPA135:NOP15:C7_01030C_A:DBP7:GCN3:C7_01360C_A:FLU1:C7_01940C_A:RAD14:C7_02100W_A:FMP45:YCF1:C7_02340C_A:C7_02460C_A:PEX1:C7_02930C_A:ZCF29:CPY1:ISY1:ENP2:MAM33:C7_03990C_A:C7_04140C_A:UTP18:NRG1:MIS12:CR_00460C_A:PHO81:CR_00670C_A:BUD22:BMT3:PWP2:TRM1:CAB3:CR_01410C_A:CR_01700C_A:CR_01780W_A:CR_01950W_A:CR_02030C_A:CR_02420W_A:CR_02430C_A:CR_02460W_A:CR_02510W_A:RPC19:DBP2:RPC31:CR_02890C_A:AQY1:SRP40:CR_03110W_A:CR_03230W_A:CR_03360W_A:KTI12:NCS2:YVH1:IFF3:SGD1:PRP42:CR_03760W_A:CR_03940W_A:GCD1:MEX67:CR_04110W_A:CR_04160C_A:CR_04170W_A:CR_04240C_A:CR_04300W_A:NHP2:RBR2:ADE6:RPB8:CR_04920W_A:YCP4:PST3:NOC2:CR_05550C_A:RNR3:MTG2:DBP8:SDA1:VPS75:SFL1:SOK1:RPL7:FGR50:RGS2:CR_06680C_A:NMD3:CR_06840W_A:CR_06980W_A:CR_07030C_A:CR22:CR_07080W_A:CR_07160C_A:CR_07470W_A:CR_07480W_A:CR_07640C_A:DBP6:CR_07780W_A:IMP4:CR_08000C_A:NOPI0:SSB1:RIO2:CR_08130W_A:TRM9:HSP104:ATS1:CR_08330W_A:CYS3:GSH2:TSR1:CR_08500W_A:PRP8:CR_08940W_A:CR_09110C_A:CR_09140C_A:ELF1:CR_09670C |
|--|--|--|--|--|--|---------------------------------------------------------------------------------------------------------------------------------------------------------------------------------------------------------------------------------------------------------------------------------------------------------------------------------------------------------------------------------------------------------------------------------------------------------------------------------------------------------------------------------------------------------------------------------------------------------------------------------------------------------------------------------------------------------------------------------------------------------------------------------------------------------------------------------------------------------------------------------------------------------------------------------------------------------------------------------------------------------------------------------------------------------------------------------------------------------------------------------------------------------------------------------------------------------------------------------------------------------------------------------------------------------------------------------------------------------------------------------------------------------------------------------------------------------------------------------------------------------------------------------------------------------------------------------------------------------------------------------------------------------------------------------------------------------------------------------------------------------------------------------------------------------------------------------------------------------------------------------------------------------------------------------------------------------------------------------------------------------------------------------------------------------------------------------------------------------------------------------------------------------------------------------------------------------------------------------------------------------------------------------------------------------------------------------------------------------------------------------------------------------------------------------------------------------------------------------------------------------------------------------------------------------------------------------------------------|



|       |                                 |                          |                                       |         |       |                                                                                                                           |
|-------|---------------------------------|--------------------------|---------------------------------------|---------|-------|---------------------------------------------------------------------------------------------------------------------------|
|       |                                 |                          |                                       |         |       | _A:SSF1:CR_09800C_A:SIK1:UGA3:CR_09990W_A:CR_10170C_A:UTP5:AHA1:CR_10400W_A:CR_10410C_A:CR_10430C_A:CR_10470C_A:DRS1:POP3 |
| 18202 | peptidyl-histidine modification | 8 out of 804 genes, 1.0% | 11 out of 6473 background genes, 0.2% | 0.00882 | 0.00% | C2_01060C_A:C2_03830W_A:KTI11:C2_07920W_A:C4_00490W_A:C4_00690C_A:C5_03640W_A:C5_03700C_A                                 |

|       |                                                           |                           |                                       |         |       |                                                                                                                                    |
|-------|-----------------------------------------------------------|---------------------------|---------------------------------------|---------|-------|------------------------------------------------------------------------------------------------------------------------------------|
| 6383  | transcription by RNA polymerase III                       | 14 out of 804 genes, 1.7% | 31 out of 6473 background genes, 0.5% | 0.00883 | 0.00% | C1_05230W_A:RPC40:RPC11:C4_03040W_A:C4_04510W_A:C4_07060W_A:RPO26:C5_04990W_A:C6_03210C_A:RPC19:RPC31:CR_02890C_A:RPB8:CR_05550C_A |
| 43633 | polyadenylation-dependent RNA catabolic process           | 10 out of 804 genes, 1.2% | 17 out of 6473 background genes, 0.3% | 0.00975 | 0.00% | C1_01160C_A:C1_03830C_A:RRP6:C1_05360C_A:C1_06540C_A:C1_06800W_A:C1_12350W_A:RAT1:C4_03740W_A:RRP42                                |
| 43634 | polyadenylation-dependent ncRNA catabolic process         | 10 out of 804 genes, 1.2% | 17 out of 6473 background genes, 0.3% | 0.00975 | 0.00% | C1_01160C_A:C1_03830C_A:RRP6:C1_05360C_A:C1_06540C_A:C1_06800W_A:C1_12350W_A:RAT1:C4_03740W_A:RRP42                                |
| 71029 | nuclear ncRNA surveillance                                | 10 out of 804 genes, 1.2% | 17 out of 6473 background genes, 0.3% | 0.00975 | 0.00% | C1_01160C_A:C1_03830C_A:RRP6:C1_05360C_A:C1_06540C_A:C1_06800W_A:C1_12350W_A:RAT1:C4_03740W_A:RRP42                                |
| 71046 | nuclear polyadenylation-dependent ncRNA catabolic process | 10 out of 804 genes, 1.2% | 17 out of 6473 background genes, 0.3% | 0.00975 | 0.00% | C1_01160C_A:C1_03830C_A:RRP6:C1_05360C_A:C1_06540C_A:C1_06800W_A:C1_12350W_A:RAT1:C4_03740W_A:RRP42                                |

|      |                               |                           |                                        |         |       |                                                                                                                                                                                                                                                                                                                                                                                                                     |
|------|-------------------------------|---------------------------|----------------------------------------|---------|-------|---------------------------------------------------------------------------------------------------------------------------------------------------------------------------------------------------------------------------------------------------------------------------------------------------------------------------------------------------------------------------------------------------------------------|
| 6397 | mRNA processing               | 38 out of 804 genes, 4.7% | 149 out of 6473 background genes, 2.3% | 0.01093 | 0.00% | C1_01470W_A:C1_02090C_A:C1_03370W_A:C1_03830C_A:C1_04120C_A:C1_04990C_A:C1_06540C_A:C1_08630W_A:C1_11910W_A:C1_12350W_A:C1_12670C_A:C2_00280C_A:PRP3:SNU114:CWC22:C2_10810W_A:C3_00100W_A:C3_01560W_A:C3_03330C_A:C3_04380C_A:DED1:PRP5:C3_07480W_A:C4_01280C_A:C4_03150W_A:C4_06410W_A:C4_07100C_A:C5_00920W_A:C5_01930W_A:C5_03010W_A:C5_04610W_A:C6_00530C_A:ISY1:CR_01700C_A:CR_03230W_A:PRP42:PRP8:CR_10430C_A |
| 2097 | tRNA wobble base modification | 13 out of 804 genes, 1.6% | 28 out of 6473 background genes, 0.4%  | 0.01307 | 0.00% | C1_12570C_A:KTI11:ELP3:C4_00940W_A:C4_02850W_A:NBP35:C4_05260W_A:C5_02730C_A:KTI12:NCS2:CR_04300W_A:TRM9:ATS1                                                                                                                                                                                                                                                                                                       |
| 6413 | translational initiation      | 16 out of 804 genes, 2.0% | 41 out of 6473 background genes, 0.6%  | 0.01918 | 0.00% | C1_01900C_A:C1_02430C_A:SUI2:FUN12:GCD6:GCD7:TIF4631:TIF11:DED1:NIP1:C5_02010C_A:GCD11:TIF5:GCN3:GCD1:CR_04160C_A                                                                                                                                                                                                                                                                                                   |

|       |                                                          |                           |                                       |         |       |                                                                                               |
|-------|----------------------------------------------------------|---------------------------|---------------------------------------|---------|-------|-----------------------------------------------------------------------------------------------|
| 9156  | ribonucleoside monophosphate biosynthetic process        | 10 out of 804 genes, 1.2% | 18 out of 6473 background genes, 0.3% | 0.01951 | 0.00% | ADE4:ADE5,7:GUA1:HPT1:ADE8:C2_03360W_A:IMH3:URA3:ADE2:ADE6                                    |
| 9161  | ribonucleoside monophosphate metabolic process           | 10 out of 804 genes, 1.2% | 18 out of 6473 background genes, 0.3% | 0.01951 | 0.00% | ADE4:ADE5,7:GUA1:HPT1:ADE8:C2_03360W_A:IMH3:URA3:ADE2:ADE6                                    |
| 71035 | nuclear polyadenylation-dependent rRNA catabolic process | 9 out of 804 genes, 1.1%  | 15 out of 6473 background genes, 0.2% | 0.02312 | 0.00% | C1_01160C_A:C1_03830C_A:RRP6:C1_05360C_A:C1_06540C_A:C1_06800W_A:C1_12350W_A:RAT1:C4_03740W_A |
| 9126  | purine nucleoside monophosphate metabolic process        | 9 out of 804 genes, 1.1%  | 15 out of 6473 background genes, 0.2% | 0.02312 | 0.00% | ADE4:ADE5,7:GUA1:HPT1:ADE8:C2_03360W_A:IMH3:ADE2:ADE6                                         |
| 9127  | purine nucleoside monophosphate biosynthetic process     | 9 out of 804 genes, 1.1%  | 15 out of 6473 background genes, 0.2% | 0.02312 | 0.00% | ADE4:ADE5,7:GUA1:HPT1:ADE8:C2_03360W_A:IMH3:ADE2:ADE6                                         |

|       |                                                          |                           |                                       |         |       |                                                                                                   |
|-------|----------------------------------------------------------|---------------------------|---------------------------------------|---------|-------|---------------------------------------------------------------------------------------------------|
| 9167  | purine ribonucleoside monophosphate metabolic process    | 9 out of 804 genes, 1.1%  | 15 out of 6473 background genes, 0.2% | 0.02312 | 0.00% | ADE4:ADE5,7:GUA1:HPT1:ADE8:C2_03360W_A:IMH3:ADE2:ADE6                                             |
| 9168  | purine ribonucleoside monophosphate biosynthetic process | 9 out of 804 genes, 1.1%  | 15 out of 6473 background genes, 0.2% | 0.02312 | 0.00% | ADE4:ADE5,7:GUA1:HPT1:ADE8:C2_03360W_A:IMH3:ADE2:ADE6                                             |
| 70475 | rRNA base methylation                                    | 6 out of 804 genes, 0.7%  | 7 out of 6473 background genes, 0.1%  | 0.03115 | 0.00% | C2_08840W_A:C3_05860C_A:BUD23:CR_01780W_A:CR_02030C_A:CR_04170W_A                                 |
| 2098  | tRNA wobble uridine modification                         | 12 out of 804 genes, 1.5% | 26 out of 6473 background genes, 0.4% | 0.03131 | 0.00% | C1_12570C_A:KTI11:ELP3:C4_00940W_A:C4_02850W_A:NBP35:C4_05260W_A:C5_02730C_A:KTI12:NCS2:TRM9:ATS1 |

|       |                                      |                           |                                        |         |       |                                                                                                                                                                                                                                                                                                                           |
|-------|--------------------------------------|---------------------------|----------------------------------------|---------|-------|---------------------------------------------------------------------------------------------------------------------------------------------------------------------------------------------------------------------------------------------------------------------------------------------------------------------------|
| 51168 | nuclear export                       | 37 out of 804 genes, 4.6% | 150 out of 6473 background genes, 2.3% | 0.03226 | 0.00% | RRS1:HMT1:C1_01470W_A:C1_02450C_A:ARX1:C1_04040C_A:C1_04120C_A:C1_07690C_A:C1_11910W_A:C1_12760W_A:C2_06850W_A:KRE30:MTR2:UTP8:C3_01520C_A:C3_02040C_A:SFP1:NOG1:C3_06150W_A:ZUO1:ECM1:C4_04510W_A:C4_06210C_A:C4_07100C_A:BUD23:RIX7:C5_03550W_A:C6_02230W_A:MRT4:C7_04140C_A:YVH1:MEX67:SDA1:NMD3:CR_07080W_A:SSB1:ELF1 |
| 2E+06 | mRNA pseudouridine synthesis         | 5 out of 804 genes, 0.6%  | 5 out of 6473 background genes, 0.1%   | 0.04029 | 0.00% | C1_10620W_A:PUS7:PUS4:C5_01610W_A:C6_02350C_A                                                                                                                                                                                                                                                                             |
| 42256 | cytosolic ribosome assembly          | 5 out of 804 genes, 0.6%  | 5 out of 6473 background genes, 0.1%   | 0.04029 | 0.00% | RIA1:FUN12:C4_02880C_A:TIF5:CR_07080W_A                                                                                                                                                                                                                                                                                   |
| 2183  | cytoplasmic translational initiation | 11 out of 804 genes, 1.4% | 23 out of 6473 background genes, 0.4%  | 0.04578 | 0.00% | SUI2:FUN12:GCD6:GCD7:TIF11:DED1:C5_02010C_A:GCD11:TIF5:GCN3:GCD1                                                                                                                                                                                                                                                          |

|       |                          |                           |                                       |         |       |                                                                                                               |
|-------|--------------------------|---------------------------|---------------------------------------|---------|-------|---------------------------------------------------------------------------------------------------------------|
| 16075 | rRNA catabolic process   | 12 out of 804 genes, 1.5% | 27 out of 6473 background genes, 0.4% | 0.05005 | 0.00% | C1_01160C_A:C1_03830C_A:RRP6:C1_05360C_A:NPL4:C1_06540C_A:C1_06800W_A:C1_12350W_A:RPT6:RAT1:C4_03740W_A:RRP42 |
| 46040 | IMP metabolic process    | 7 out of 804 genes, 0.9%  | 10 out of 6473 background genes, 0.2% | 0.05237 | 0.00% | ADE4:ADE5,7:HPT1:ADE8:C2_03360W_A:ADE2:ADE6                                                                   |
| 6188  | IMP biosynthetic process | 7 out of 804 genes, 0.9%  | 10 out of 6473 background genes, 0.2% | 0.05237 | 0.00% | ADE4:ADE5,7:HPT1:ADE8:C2_03360W_A:ADE2:ADE6                                                                   |

|       |                                             |                             |                                        |         |       |                                                                                                                                                                                                                                                                                                                                                                                                                                                                                                                                                                                                                                                                                                                                                                                                                                                                                                                                                   |
|-------|---------------------------------------------|-----------------------------|----------------------------------------|---------|-------|---------------------------------------------------------------------------------------------------------------------------------------------------------------------------------------------------------------------------------------------------------------------------------------------------------------------------------------------------------------------------------------------------------------------------------------------------------------------------------------------------------------------------------------------------------------------------------------------------------------------------------------------------------------------------------------------------------------------------------------------------------------------------------------------------------------------------------------------------------------------------------------------------------------------------------------------------|
| 22607 | cellular component assembly                 | 110 out of 804 genes, 13.7% | 623 out of 6473 background genes, 9.6% | 0.05813 | 0.00% | RRS1:ATG17:RPL6:C1_03790C_A:C1_04040C_A:C1_04120C_A:ERB1:NOP4:RRP6:C1_05360C_A:RPS27A:C1_06760C_A:SUI2:RIA1:FUN12:JIP5:C1_09710C_A:C1_10970W_A:CSI2:C1_12440W_A:C1_12760W_A:C1_14080W_A:SAM35:C2_00280C_A:C2_00810C_A:C2_01070W_A:C2_02540W_A:C2_02710C_A:PRP3:SNU114:MAK5:C2_05160C_A:RPF2:RPL11:TIF4631:RPT6:TIF11:C2_10740C_A:C3_00100W_A:BMS1:C3_01560W_A:C3_02020W_A:C3_02040C_A:C3_02350W_A:C3_03330C_A:HBR3:C3_04370C_A:MAK21:C3_05160C_A:QDR2:NOG1:C3_06370C_A:PRP5:C3_07480W_A:RLP24:MDN1:TOA2:C4_02880C_A:C4_03150W_A:C4_05010W_A:MYO5:NBP35:C4_06410W_A:C4_07100C_A:RMT2:SPB4:C5_01930W_A:C5_02010C_A:C5_02070C_A:GCD11:TIF5:HAS1:C5_05340W_A:CIC1:C6_02230W_A:NIP7:MOB1:SAC6:SPB1:RPA135:DBP7:FLU1:ISY1:ENP2:UTP18:BUD22:PWP2:CR_01410C_A:CR_01700C_A:DBP2:YVH1:SGD1:CR_03940W_A:CR_04110W_A:CR_04170W_A:NOC2:CR_05550C_A:SDA1:VPS75:CR_06680C_A:CR_07080W_A:CR_08130W_A:TSR1:PRP8:ELF1:SSF1:CR_09800C_A:CR_10410C_A:CR_10470C_A:DRS1 |
| 55    | ribosomal large subunit export from nucleus | 18 out of 804 genes, 2.2%   | 55 out of 6473 background genes, 0.8%  | 0.09129 | 0.00% | RRS1:C1_02450C_A:ARX1:C1_12760W_A:MTR2:C3_02040C_A:SFP1:C3_06150W_A:ECM1:C4_04510W_A:C4_06210C_A:C4_07100C_A:RIX7:MRT4:YVH1:MEX67:SDA1:NMD3                                                                                                                                                                                                                                                                                                                                                                                                                                                                                                                                                                                                                                                                                                                                                                                                       |
|       |                                             |                             |                                        |         |       |                                                                                                                                                                                                                                                                                                                                                                                                                                                                                                                                                                                                                                                                                                                                                                                                                                                                                                                                                   |



# S120 vs B120 Upregulated genes

| GOID  | GO_term          | Cluster frequency           | Background frequency                    | Corrected P-value | False discovery rate | Gene(s) annotated to the term                                                                                                                                                                                                                                                                                                                                                                                                                                                                                                                                                                                                                                                                                                                                                                                                                                                                                                                                                                                                                                                                                                                                                                                                                                                                                                                                                                                                                                          |
|-------|------------------|-----------------------------|-----------------------------------------|-------------------|----------------------|------------------------------------------------------------------------------------------------------------------------------------------------------------------------------------------------------------------------------------------------------------------------------------------------------------------------------------------------------------------------------------------------------------------------------------------------------------------------------------------------------------------------------------------------------------------------------------------------------------------------------------------------------------------------------------------------------------------------------------------------------------------------------------------------------------------------------------------------------------------------------------------------------------------------------------------------------------------------------------------------------------------------------------------------------------------------------------------------------------------------------------------------------------------------------------------------------------------------------------------------------------------------------------------------------------------------------------------------------------------------------------------------------------------------------------------------------------------------|
| 34470 | ncRNA processing | 157 out of 537 genes, 29.2% | 860 out of 6473 background genes, 13.3% | 1.42E-21          | 0.00%                | CNS1:C1_01150C_A:C1_01160C_A:C1_02090C_A:PDE2:C1_02850W_A:C1_03830C_A:SEN15:C1_04040C_A:RRP6:REI1:NOP6:C1_06760C_A:C1_06800W_A:C1_07950C_A:C1_07960W_A:DIP2:MSS116:C1_09710C_A:C1_10880W_A:C1_10950C_A:C1_10970W_A:NEP1:KRR1:C1_13820C_A:FAV3:NDT80:C2_00410C_A:C2_00820W_A:C2_00840W_A:REX2:UTP21:C2_02540W_A:C2_02710C_A:C2_04120C_A:RIM2:C2_04570W_A:C2_04820W_A:MAK5:C2_05160C_A:LAS1:MAK16:RTA2:C2_06480W_A:C2_06850W_A:NOC4:RCL1:C2_07520C_A:C2_07920W_A:NSA1:RRP8:UTP15:C2_09160W_A:RRP15:C2_09500W_A:C2_09510C_A:C2_09660W_A:C2_09920W_A:PUS7:C3_00100W_A:BUD21:C3_00420W_A:BMS1:C3_01560W_A:C3_02040C_A:UTP4:ILV2:C3_02670W_A:HBR3:CCC1:C3_04370C_A:MAK21:SFP1:CEM1:C3_05120C_A:C3_05140C_A:C3_05380W_A:QDR2:C3_05800W_A:NSA2:C3_06760W_A:NOP13:C3_07550C_A:RAD4:RLP24:C4_00690C_A:RAT1:C4_01730C_A:TIM12:SAS10:HCA4:ZUO1:C4_02880C_A:NAN1:RAM1:C4_04810C_A:AGP3:C4_05230C_A:C4_06210C_A:C4_06790W_A:C5_01430C_A:C5_02010C_A:RIX7:C5_02730C_A:C5_03920C_A:C5_05340W_A:C6_01040C_A:C6_01890C_A:C6_02230W_A:C6_02430W_A:C6_04240W_A:C6_04530C_A:NOP15:C7_01030C_A:DBP7:C7_02100W_A:C7_02340C_A:TIM54:C7_03400C_A:ISY1:ENP2:TIM9:C7_03850W_A:C7_03880C_A:UTP18:CR_00670C_A:BUD22:CR_01410C_A:CR_02030C_A:CR_02420W_A:RRP9:CR_03200C_A:CR_03240C_A:KTI12:PRP42:CR_04110W_A:CR_04170W_A:CR_04240C_A:MTG2:DBP8:SFL1:FGR50:NMD3:CR_07030C_A:CR_07640C_A:IMP4:CR_08000C_A:CR_08330W_A:CR_08410W_A:TSR1:SKI2:CR_08940W_A:CR_09800C_A:UTP5:CR_10410C_A:CR_10470C_A:DRS1 |

|       |                                    |                             |                                        |          |       |                                                                                                                                                                                                                                                                                                                                                                                                                                                                                                                                                                                                                                                                                                                                                                                                                                                                                                                                                                                                                                                                                                                                                                                    |
|-------|------------------------------------|-----------------------------|----------------------------------------|----------|-------|------------------------------------------------------------------------------------------------------------------------------------------------------------------------------------------------------------------------------------------------------------------------------------------------------------------------------------------------------------------------------------------------------------------------------------------------------------------------------------------------------------------------------------------------------------------------------------------------------------------------------------------------------------------------------------------------------------------------------------------------------------------------------------------------------------------------------------------------------------------------------------------------------------------------------------------------------------------------------------------------------------------------------------------------------------------------------------------------------------------------------------------------------------------------------------|
| 42274 | ribosomal small subunit biogenesis | 129 out of 537 genes, 24.0% | 636 out of 6473 background genes, 9.8% | 3.73E-21 | 0.00% | CNS1:C1_01160C_A:C1_02090C_A:C1_02850W_A:C1_03830C_A:SEN15:C1_04040C_A:REI1:NOP6:C1_06800W_A:C1_07960W_A:DIP2:MSS116:C1_09710C_A:C1_10880W_A:C1_10950C_A:NEP1:KRR1:C1_13820C_A:FAV3:NDT80:C2_00410C_A:C2_00820W_A:C2_00840W_A:C2_02540W_A:C2_02710C_A:C2_04120C_A:RIM2:C2_04570W_A:C2_04820W_A:MAK5:C2_05160C_A:LAS1:MAK16:RTA2:C2_06850W_A:NOC4:RCL1:C2_07520C_A:C2_07920W_A:NSA1:RRP8:UTP15:C2_09160W_A:RRP15:C2_09510C_A:C2_09660W_A:C2_09920W_A:C3_00100W_A:BUD21:C3_00420W_A:BM51:C3_01560W_A:C3_02040C_A:UTP4:C3_02670W_A:HBR3:CCC1:C3_04370C_A:MAK21:SFP1:CEM1:C3_05120C_A:QDR2:C3_05800W_A:NSA2:C3_06760W_A:NOP13:C3_07550C_A:RAD4:RLP24:C4_00690C_A:RAT1:C4_01730C_A:SAS10:HCA4:C4_02880C_A:NAN1:C4_06790W_A:C5_01430C_A:C5_02010C_A:RIX7:C5_03920C_A:C5_05340W_A:C6_01040C_A:C6_01890C_A:C6_02230W_A:C6_02430W_A:C6_04240W_A:NOP15:C7_01030C_A:DBP7:C7_02100W_A:TIM54:C7_03400C_A:ISY1:ENP2:TIM9:C7_03850W_A:C7_03880C_A:UTP18:BUD22:CR_01410C_A:CR_02030C_A:CR_02420W_A:RRP9:CR_03200C_A:KTI12:SGD1:CR_04110W_A:CR_04240C_A:MTG2:DBP8:SFL1:FGR50:NMD3:CR_07030C_A:IMP4:CR_08000C_A:CR_08330W_A:CR_08410W_A:TSR1:SKI2:ELF1:CR_09800C_A:UTP5:CR_10410C_A:CR_10470C_A:DRS1 |
|-------|------------------------------------|-----------------------------|----------------------------------------|----------|-------|------------------------------------------------------------------------------------------------------------------------------------------------------------------------------------------------------------------------------------------------------------------------------------------------------------------------------------------------------------------------------------------------------------------------------------------------------------------------------------------------------------------------------------------------------------------------------------------------------------------------------------------------------------------------------------------------------------------------------------------------------------------------------------------------------------------------------------------------------------------------------------------------------------------------------------------------------------------------------------------------------------------------------------------------------------------------------------------------------------------------------------------------------------------------------------|

|       |                     |                             |                                         |          |       |                                                                                                                                                                                                                                                                                                                                                                                                                                                                                                                                                                                                                                                                                                                                                                                                                                                                                                                                                                                                                                                                                                                                                                                                                                                                                                                                                                                                                              |
|-------|---------------------|-----------------------------|-----------------------------------------|----------|-------|------------------------------------------------------------------------------------------------------------------------------------------------------------------------------------------------------------------------------------------------------------------------------------------------------------------------------------------------------------------------------------------------------------------------------------------------------------------------------------------------------------------------------------------------------------------------------------------------------------------------------------------------------------------------------------------------------------------------------------------------------------------------------------------------------------------------------------------------------------------------------------------------------------------------------------------------------------------------------------------------------------------------------------------------------------------------------------------------------------------------------------------------------------------------------------------------------------------------------------------------------------------------------------------------------------------------------------------------------------------------------------------------------------------------------|
| 42254 | ribosome biogenesis | 158 out of 537 genes, 29.4% | 886 out of 6473 background genes, 13.7% | 1.35E-20 | 0.00% | BFA1:CNS1:C1_01160C_A:RPS21:C1_02090C_A:PDE2:C1_02850W_A:C1_03830C_A:SEN15:C1_04040C_A:RRP6:REI1:NOP6:C1_06760C_A:C1_06800W_A:C1_07950C_A:C1_07960W_A:DIP2:MSS116:JIP5:C1_09710C_A:C1_10880W_A:C1_10950C_A:C1_10970W_A:NEP1:KRR1:C1_13820C_A:FAV3:NDT80:C2_00410C_A:C2_00820W_A:C2_00840W_A:REX2:UTP21:C2_02540W_A:C2_02710C_A:C2_04120C_A:RIM2:C2_04570W_A:C2_04820W_A:MAK5:C2_05160C_A:LAS1:MAK16:RTA2:C2_06850W_A:NOC4:RCL1:C2_07520C_A:C2_07920W_A:NSA1:KRE30:RRP8:UTP15:C2_09160W_A:RRP15:C2_09510C_A:C2_09660W_A:C2_09920W_A:PUS7:MTR2:C3_00100W_A:BUD21:C3_00420W_A:BMS1:C3_01560W_A:C3_02040C_A:UTP4:ILV2:C3_02670W_A:HBR3:CCC1:C3_04370C_A:MAK21:SFP1:CEM1:C3_05120C_A:C3_05380W_A:QDR2:C3_05800W_A:NSA2:C3_06760W_A:NOP13:C3_07550C_A:RAD4:RLP24:C4_00690C_A:RAT1:C4_01730C_A:TIM12:SAS10:HCA4:ZUO1:C4_02880C_A:NAN1:RAM1:C4_04820C_A:AGP3:C4_05010W_A:C4_05230C_A:C4_06210C_A:C4_06790W_A:C5_01430C_A:C5_02010C_A:RIX7:C5_03920C_A:C5_05340W_A:C6_01040C_A:C6_01890C_A:C6_02230W_A:C6_02430W_A:C6_04240W_A:NOP15:C7_01030C_A:DBP7:C7_02100W_A:TIM54:C7_03400C_A:ISY1:ENP2:TIM9:C7_03850W_A:C7_03880C_A:UTP18:BUD22:CR_01410C_A:CR_02030C_A:CR_02420W_A:RRP9:CR_03200C_A:CR_03240C_A:KTI12:SGD1:PRP42:CR_04110W_A:CR_04170W_A:CR_04240C_A:RPS3:MTG2:DBP8:SFL1:FGR50:NMD3:CR_07030C_A:CR_07640C_A:IMP4:CR_08000C_A:CR_08330W_A:CR_08410W_A:TSR1:CR_08500W_A:SKI2:ELF1:CR_09800C_A:UTP5:CR_10410C_A:CR_10470C_A:DRS1 |
|-------|---------------------|-----------------------------|-----------------------------------------|----------|-------|------------------------------------------------------------------------------------------------------------------------------------------------------------------------------------------------------------------------------------------------------------------------------------------------------------------------------------------------------------------------------------------------------------------------------------------------------------------------------------------------------------------------------------------------------------------------------------------------------------------------------------------------------------------------------------------------------------------------------------------------------------------------------------------------------------------------------------------------------------------------------------------------------------------------------------------------------------------------------------------------------------------------------------------------------------------------------------------------------------------------------------------------------------------------------------------------------------------------------------------------------------------------------------------------------------------------------------------------------------------------------------------------------------------------------|

|       |                                   |                                   |                                                     |          |       |                                                                                                                                                                                                                                                                                                                                                                                                                                                                                                                                                                                                                                                                                                                                                                                                                                                                                                                                                                                                                                                                                                                                                              |
|-------|-----------------------------------|-----------------------------------|-----------------------------------------------------|----------|-------|--------------------------------------------------------------------------------------------------------------------------------------------------------------------------------------------------------------------------------------------------------------------------------------------------------------------------------------------------------------------------------------------------------------------------------------------------------------------------------------------------------------------------------------------------------------------------------------------------------------------------------------------------------------------------------------------------------------------------------------------------------------------------------------------------------------------------------------------------------------------------------------------------------------------------------------------------------------------------------------------------------------------------------------------------------------------------------------------------------------------------------------------------------------|
| 30490 | maturati<br>on of<br>SSU-<br>rRNA | 126 out of<br>537 genes,<br>23.5% | 627 out of<br>6473<br>backgroun<br>d genes,<br>9.7% | 3.62E-20 | 0.00% | CNS1:C1_01160C_A:C1_02090C_A:C1_02850W_A:C1_03830C_A:SEN15:C1_04040C_A:REI1:NOP6:C1_06800W_A:C1_07960W_A:DIP2:MSS116:C1_09710C_A:C1_10880W_A:C1_10950C_A:NEP1:KRR1:C1_13820C_A:FAV3:NDT80:C2_00410C_A:C2_00820W_A:C2_00840W_A:C2_02540W_A:C2_04120C_A:RIM2:C2_04570W_A:C2_04820W_A:MAK5:C2_05160C_A:LAS1:MAK16:RTA2:C2_06850W_A:NOC4:RCL1:C2_07520C_A:C2_07920W_A:NSA1:RRP8:UTP15:C2_09160W_A:RRP15:C2_09510C_A:C2_09660W_A:C2_09920W_A:C3_00100W_A:BUD21:C3_00420W_A:BMS1:C3_01560W_A:C3_02040C_A:UTP4:C3_02670W_A:HBR3:CCC1:C3_04370C_A:MAK21:SFP1:CEM1:C3_05120C_A:QDR2:C3_05800W_A:NSA2:C3_06760W_A:NOP13:C3_07550C_A:RAD4:RLP24:C4_00690C_A:RAT1:C4_01730C_A:SAS10:HCA4:C4_02880C_A:NAN1:C4_06790W_A:C5_01430C_A:C5_02010C_A:RIX7:C5_03920C_A:C5_05340W_A:C6_01040C_A:C6_01890C_A:C6_02230W_A:C6_02430W_A:C6_04240W_A:NOP15:C7_01030C_A:DBP7:C7_02100W_A:TIM54:C7_03400C_A:ISY1:ENP2:TIM9:C7_03850W_A:C7_03880C_A:UTP18:BUD22:CR_01410C_A:CR_02030C_A:CR_02420W_A:RRP9:CR_03200C_A:KTI12:CR_04110W_A:CR_04240C_A:MTG2:DBP8:SFL1:FGR50:NMD3:CR_07030C_A:IMP4:CR_08000C_A:CR_08330W_A:CR_08410W_A:TSR1:SKI2:CR_09800C_A:UTP5:CR_10410C_A:CR_10470C_A:DRS1 |
|-------|-----------------------------------|-----------------------------------|-----------------------------------------------------|----------|-------|--------------------------------------------------------------------------------------------------------------------------------------------------------------------------------------------------------------------------------------------------------------------------------------------------------------------------------------------------------------------------------------------------------------------------------------------------------------------------------------------------------------------------------------------------------------------------------------------------------------------------------------------------------------------------------------------------------------------------------------------------------------------------------------------------------------------------------------------------------------------------------------------------------------------------------------------------------------------------------------------------------------------------------------------------------------------------------------------------------------------------------------------------------------|

|     |                                                                                                                                       |                                   |                                                     |          |       |                                                                                                                                                                                                                                                                                                                                                                                                                                                                                                                                                                                                                                                                                                                                                                                                                                                                                                                                                                                                                                                                                                                                                  |
|-----|---------------------------------------------------------------------------------------------------------------------------------------|-----------------------------------|-----------------------------------------------------|----------|-------|--------------------------------------------------------------------------------------------------------------------------------------------------------------------------------------------------------------------------------------------------------------------------------------------------------------------------------------------------------------------------------------------------------------------------------------------------------------------------------------------------------------------------------------------------------------------------------------------------------------------------------------------------------------------------------------------------------------------------------------------------------------------------------------------------------------------------------------------------------------------------------------------------------------------------------------------------------------------------------------------------------------------------------------------------------------------------------------------------------------------------------------------------|
| 462 | maturati<br>on of<br>SSU-<br>rRNA<br>from<br>tricistroni<br>c rRNA<br>transcrip<br>t (SSU-<br>rRNA,<br>5.8S<br>rRNA,<br>LSU-<br>rRNA) | 125 out of<br>537 genes,<br>23.3% | 620 out of<br>6473<br>backgroun<br>d genes,<br>9.6% | 4.17E-20 | 0.00% | CNS1:C1_01160C_A:C1_02090C_A:C1_02850W_A:C1_03830C_A:SEN15:C1_04040C_A:REI1:NOP6:C1_06800W_A:C1_07960W_A:DIP2:MSS116:C1_09710C_A:C1_10880W_A:C1_10950C_A:NEP1:KRR1:C1_13820C_A:FAV3:NDT80:C2_00410C_A:C2_00820W_A:C2_00840W_A:C2_02540W_A:C2_04120C_A:RIM2:C2_04570W_A:C2_04820W_A:MAK5:C2_05160C_A:LAS1:MAK16:RTA2:C2_06850W_A:NOC4:RCL1:C2_07520C_A:C2_07920W_A:NSA1:RRP8:UTP15:C2_09160W_A:RRP15:C2_09510C_A:C2_09660W_A:C2_09920W_A:C3_00100W_A:BUD21:C3_00420W_A:BMS1:C3_01560W_A:C3_02040C_A:UTP4:C3_02670W_A:HBR3:CCC1:C3_04370C_A:MAK21:SFP1:CEM1:C3_05120C_A:QDR2:C3_05800W_A:NSA2:C3_06760W_A:NOP13:C3_07550C_A:RAD4:RLP24:C4_00690C_A:RAT1:C4_01730C_A:SAS10:HCA4:C4_02880C_A:NAN1:C4_06790W_A:C5_01430C_A:C5_02010C_A:RIX7:C5_03920C_A:C5_05340W_A:C6_01040C_A:C6_01890C_A:C6_02230W_A:C6_02430W_A:C6_04240W_A:NOP15:C7_01030C_A:DBP7:C7_02100W_A:TIM54:C7_03400C_A:ISY1:ENP2:TIM9:C7_03850W_A:C7_03880C_A:UTP18:BUD22:CR_01410C_A:CR_02030C_A:CR_02420W_A:RRP9:CR_03200C_A:KTI12:CR_04110W_A:MTG2:DBP8:SFL1:FGR50:NMD3:CR_07030C_A:IMP4:CR_08000C_A:CR_08330W_A:CR_08410W_A:TSR1:SKI2:CR_09800C_A:UTP5:CR_10410C_A:CR_10470C_A:DRS1 |
|-----|---------------------------------------------------------------------------------------------------------------------------------------|-----------------------------------|-----------------------------------------------------|----------|-------|--------------------------------------------------------------------------------------------------------------------------------------------------------------------------------------------------------------------------------------------------------------------------------------------------------------------------------------------------------------------------------------------------------------------------------------------------------------------------------------------------------------------------------------------------------------------------------------------------------------------------------------------------------------------------------------------------------------------------------------------------------------------------------------------------------------------------------------------------------------------------------------------------------------------------------------------------------------------------------------------------------------------------------------------------------------------------------------------------------------------------------------------------|

|       |                         |                             |                                         |          |       |                                                                                                                                                                                                                                                                                                                                                                                                                                                                                                                                                                                                                                                                                                                                                                                                                                                                                                                                                                                                                                                                                                                                                                                                                                                                                                                                                                                                                                                                                                           |
|-------|-------------------------|-----------------------------|-----------------------------------------|----------|-------|-----------------------------------------------------------------------------------------------------------------------------------------------------------------------------------------------------------------------------------------------------------------------------------------------------------------------------------------------------------------------------------------------------------------------------------------------------------------------------------------------------------------------------------------------------------------------------------------------------------------------------------------------------------------------------------------------------------------------------------------------------------------------------------------------------------------------------------------------------------------------------------------------------------------------------------------------------------------------------------------------------------------------------------------------------------------------------------------------------------------------------------------------------------------------------------------------------------------------------------------------------------------------------------------------------------------------------------------------------------------------------------------------------------------------------------------------------------------------------------------------------------|
| 34660 | ncRNA metabolic process | 162 out of 537 genes, 30.2% | 935 out of 6473 background genes, 14.4% | 7.65E-20 | 0.00% | CNS1:C1_01150C_A:C1_01160C_A:C1_02090C_A:PDE2:C1_02850W_A:C1_03830C_A:SEN15:C1_04040C_A:RRP6:REI1:NOP6:C1_06760C_A:C1_06800W_A:C1_07950C_A:C1_07960W_A:DIP2:MSS116:C1_09710C_A:C1_10880W_A:C1_10950C_A:C1_10970W_A:NEP1:KRR1:C1_13820C_A:FAV3:NDT80:C2_00410C_A:C2_00820W_A:C2_00840W_A:REX2:UTP21:C2_02540W_A:C2_02710C_A:C2_04120C_A:RIM2:C2_04570W_A:C2_04820W_A:MAK5:C2_05160C_A:RPC40:LAS1:MAK16:RTA2:C2_06480W_A:C2_06850W_A:RPA12:NOC4:RCL1:C2_07520C_A:C2_07920W_A:NSA1:RRP8:UTP15:C2_09160W_A:RRP15:C2_09500W_A:C2_09510C_A:C2_09660W_A:C2_09920W_A:PUS7:C3_00100W_A:BUD21:C3_00420W_A:BMS1:C3_01560W_A:C3_02040C_A:UTP4:ILV2:C3_02670W_A:HBR3:CCC1:C3_04370C_A:MAK21:SFP1:CEM1:C3_05120C_A:C3_05140C_A:C3_05380W_A:QDR2:C3_05800W_A:NSA2:C3_06760W_A:NOP13:C3_07550C_A:RAD4:RLP24:C4_00690C_A:RAT1:C4_01730C_A:TIM12:SAS10:HCA4:ZUO1:C4_02880C_A:NAN1:RAM1:C4_04810C_A:AGP3:C4_05230C_A:C4_06210C_A:C4_06790W_A:C5_01430C_A:C5_02010C_A:RIX7:C5_02730C_A:C5_03920C_A:MSM1:C5_05340W_A:C6_01040C_A:C6_01890C_A:C6_02230W_A:C6_02430W_A:C6_04240W_A:C6_04530C_A:NOP15:C7_01030C_A:DBP7:C7_02100W_A:C7_02340C_A:TIM54:C7_03400C_A:ISY1:ENP2:TIM9:C7_03850W_A:C7_03880C_A:UTP18:CR_00670C_A:BUD22:CR_01410C_A:CR_01950W_A:CR_02030C_A:CR_02420W_A:RRP9:DOM34:CR_03200C_A:CR_03240C_A:KTI12:PRP42:CR_04110W_A:CR_04170W_A:CR_04240C_A:MTG2:DBP8:SFL1:FGR50:NMD3:CR_07030C_A:CR_07640C_A:IMP4:CR_08000C_A:CR_08330W_A:CR_08410W_A:TSR1:SKI2:CR_08940W_A:CR_09800C_A:UTP5:CR_10410C_A:CR_10470C_A:DRS1 |
|-------|-------------------------|-----------------------------|-----------------------------------------|----------|-------|-----------------------------------------------------------------------------------------------------------------------------------------------------------------------------------------------------------------------------------------------------------------------------------------------------------------------------------------------------------------------------------------------------------------------------------------------------------------------------------------------------------------------------------------------------------------------------------------------------------------------------------------------------------------------------------------------------------------------------------------------------------------------------------------------------------------------------------------------------------------------------------------------------------------------------------------------------------------------------------------------------------------------------------------------------------------------------------------------------------------------------------------------------------------------------------------------------------------------------------------------------------------------------------------------------------------------------------------------------------------------------------------------------------------------------------------------------------------------------------------------------------|

|      |                 |                             |                                         |          |       |                                                                                                                                                                                                                                                                                                                                                                                                                                                                                                                                                                                                                                                                                                                                                                                                                                                                                                                                                                                                                                                                                                                                                                                                                                                                                                                                                |
|------|-----------------|-----------------------------|-----------------------------------------|----------|-------|------------------------------------------------------------------------------------------------------------------------------------------------------------------------------------------------------------------------------------------------------------------------------------------------------------------------------------------------------------------------------------------------------------------------------------------------------------------------------------------------------------------------------------------------------------------------------------------------------------------------------------------------------------------------------------------------------------------------------------------------------------------------------------------------------------------------------------------------------------------------------------------------------------------------------------------------------------------------------------------------------------------------------------------------------------------------------------------------------------------------------------------------------------------------------------------------------------------------------------------------------------------------------------------------------------------------------------------------|
| 6364 | rRNA processing | 147 out of 537 genes, 27.4% | 806 out of 6473 background genes, 12.5% | 8.65E-20 | 0.00% | CNS1:C1_01160C_A:C1_02090C_A:PDE2:C1_02850W_A:C1_03830C_A:SEN15:C1_04040C_A:RRP6:REI1:NOP6:C1_06760C_A:C1_06800W_A:C1_07950C_A:C1_07960W_A:DIP2:MSS116:C1_09710C_A:C1_10880W_A:C1_10950C_A:C1_10970W_A:NEP1:KRR1:C1_13820C_A:FAV3:NDT80:C2_00410C_A:C2_00820W_A:C2_00840W_A:REX2:UTP21:C2_02540W_A:C2_02710C_A:C2_04120C_A:RIM2:C2_04570W_A:C2_04820W_A:MAK5:C2_05160C_A:LAS1:MAK16:RTA2:C2_06850W_A:NOC4:RCL1:C2_07520C_A:C2_07920W_A:NSA1:RRP8:UTP15:C2_09160W_A:RRP15:C2_09510C_A:C2_09660W_A:C2_09920W_A:PUS7:C3_00100W_A:BUD21:C3_00420W_A:BMS1:C3_01560W_A:C3_02040C_A:UTP4:ILV2:C3_02670W_A:HBR3:CCC1:C3_04370C_A:MAK21:SFP1:CEM1:C3_05120C_A:C3_05380W_A:QDR2:C3_05800W_A:NSA2:C3_06760W_A:NOP13:C3_07550C_A:RAD4:RLP24:C4_00690C_A:RAT1:C4_01730C_A:TIM12:SAS10:HCA4:ZUO1:C4_02880C_A:NAN1:RAM1:AGP3:C4_05230C_A:C4_06210C_A:C4_06790W_A:C5_01430C_A:C5_02010C_A:RIX7:C5_03920C_A:C5_05340W_A:C6_01040C_A:C6_01890C_A:C6_02230W_A:C6_02430W_A:C6_04240W_A:NOP15:C7_01030C_A:DBP7:C7_02100W_A:TIM54:C7_03400C_A:ISY1:ENP2:TIM9:C7_03850W_A:C7_03880C_A:UTP18:BUD22:CR_01410C_A:CR_02030C_A:CR_02420W_A:RRP9:CR_03200C_A:CR_03240C_A:KTI12:PRP42:CR_04110W_A:CR_04170W_A:CR_04240C_A:MTG2:DBP8:SFL1:FGR50:NMD3:CR_07030C_A:CR_07640C_A:IMP4:CR_08000C_A:CR_08330W_A:CR_08410W_A:TSR1:SKI2:CR_09800C_A:UTP5:CR_10410C_A:CR_10470C_A:DRS1 |
|------|-----------------|-----------------------------|-----------------------------------------|----------|-------|------------------------------------------------------------------------------------------------------------------------------------------------------------------------------------------------------------------------------------------------------------------------------------------------------------------------------------------------------------------------------------------------------------------------------------------------------------------------------------------------------------------------------------------------------------------------------------------------------------------------------------------------------------------------------------------------------------------------------------------------------------------------------------------------------------------------------------------------------------------------------------------------------------------------------------------------------------------------------------------------------------------------------------------------------------------------------------------------------------------------------------------------------------------------------------------------------------------------------------------------------------------------------------------------------------------------------------------------|

|           |                           |                                   |                                                  |          |       |                                                                                                                                                                                                                                                                                                                                                                                                                                                                                                                                                                                                                                                                                                                                                                                                                                                                                                                                                                                                                                                                                                                                                                                                                                                                                                                                                                        |
|-----------|---------------------------|-----------------------------------|--------------------------------------------------|----------|-------|------------------------------------------------------------------------------------------------------------------------------------------------------------------------------------------------------------------------------------------------------------------------------------------------------------------------------------------------------------------------------------------------------------------------------------------------------------------------------------------------------------------------------------------------------------------------------------------------------------------------------------------------------------------------------------------------------------------------------------------------------------------------------------------------------------------------------------------------------------------------------------------------------------------------------------------------------------------------------------------------------------------------------------------------------------------------------------------------------------------------------------------------------------------------------------------------------------------------------------------------------------------------------------------------------------------------------------------------------------------------|
| 1607<br>2 | rRNA<br>metabolic process | 150 out of<br>537 genes,<br>27.9% | 835 out of<br>6473<br>background genes,<br>12.9% | 1.33E-19 | 0.00% | CNS1:C1_01160C_A:C1_02090C_A:PDE2:C1_02850W_A:C1_03830C_A:SEN15:C1_04040C_A:RRP6:REI1:NOP6:C1_06760C_A:C1_06800W_A:C1_07950C_A:C1_07960W_A:DIP2:MSS116:C1_09710C_A:C1_10880W_A:C1_10950C_A:C1_10970W_A:NEP1:KRR1:C1_13820C_A:FAV3:NDT80:C2_00410C_A:C2_00820W_A:C2_00840W_A:REX2:UTP21:C2_02540W_A:C2_02710C_A:C2_04120C_A:RIM2:C2_04570W_A:C2_04820W_A:MAK5:C2_05160C_A:LAS1:MAK16:RTA2:C2_06850W_A:RPA12:NOC4:RCL1:C2_07520C_A:C2_07920W_A:NSA1:RRP8:UTP15:C2_09160W_A:RRP15:C2_09510C_A:C2_09660W_A:C2_09920W_A:PUS7:C3_00100W_A:BUD21:C3_00420W_A:BMS1:C3_01560W_A:C3_02040C_A:UTP4:ILV2:C3_02670W_A:HBR3:CCC1:C3_04370C_A:MAK21:SFP1:CEM1:C3_05120C_A:C3_05380W_A:QDR2:C3_05800W_A:NSA2:C3_06760W_A:NOP13:C3_07550C_A:RAD4:RLP24:C4_00690C_A:RAT1:C4_01730C_A:TIM12:SAS10:HCA4:ZUO1:C4_02880C_A:NAN1:RAM1:AGP3:C4_05230C_A:C4_06210C_A:C4_06790W_A:C5_01430C_A:C5_02010C_A:RIX7:C5_03920C_A:C5_05340W_A:C6_01040C_A:C6_01890C_A:C6_02230W_A:C6_02430W_A:C6_04240W_A:NOP15:C7_01030C_A:DBP7:C7_02100W_A:TIM54:C7_03400C_A:ISY1:ENP2:TIM9:C7_03850W_A:C7_03880C_A:UTP18:BUD22:CR_01410C_A:CR_01950W_A:CR_02030C_A:CR_02420W_A:RRP9:DOM34:CR_03200C_A:CR_03240C_A:KTI12:PRP42:CR_04110W_A:CR_04170W_A:CR_04240C_A:MTG2:DBP8:SFL1:FGR50:NMD3:CR_07030C_A:CR_07640C_A:IMP4:CR_08000C_A:CR_08330W_A:CR_08410W_A:TSR1:SKI2:CR_09800C_A:UTP5:CR_10410C_A:CR_10470C_A:DRS1 |
|-----------|---------------------------|-----------------------------------|--------------------------------------------------|----------|-------|------------------------------------------------------------------------------------------------------------------------------------------------------------------------------------------------------------------------------------------------------------------------------------------------------------------------------------------------------------------------------------------------------------------------------------------------------------------------------------------------------------------------------------------------------------------------------------------------------------------------------------------------------------------------------------------------------------------------------------------------------------------------------------------------------------------------------------------------------------------------------------------------------------------------------------------------------------------------------------------------------------------------------------------------------------------------------------------------------------------------------------------------------------------------------------------------------------------------------------------------------------------------------------------------------------------------------------------------------------------------|



|       |                             |                             |                                         |          |       |                                                                                                                                                                                                                                                                                                                                                                                                                                                                                                                                                                                                                                                                                                                                                                                                                                                                                                                                                                                                                                                                                                                                                                                                                                                                                                                                                                                                                              |
|-------|-----------------------------|-----------------------------|-----------------------------------------|----------|-------|------------------------------------------------------------------------------------------------------------------------------------------------------------------------------------------------------------------------------------------------------------------------------------------------------------------------------------------------------------------------------------------------------------------------------------------------------------------------------------------------------------------------------------------------------------------------------------------------------------------------------------------------------------------------------------------------------------------------------------------------------------------------------------------------------------------------------------------------------------------------------------------------------------------------------------------------------------------------------------------------------------------------------------------------------------------------------------------------------------------------------------------------------------------------------------------------------------------------------------------------------------------------------------------------------------------------------------------------------------------------------------------------------------------------------|
| 22613 | ribonucleoprotein complexes | 158 out of 537 genes, 29.4% | 915 out of 6473 background genes, 14.1% | 4.80E-19 | 0.00% | BFA1:CNS1:C1_01160C_A:RPS21:C1_02090C_A:PDE2:C1_02850W_A:C1_03830C_A:SEN15:C1_04040C_A:RRP6:REI1:NOP6:C1_06760C_A:C1_06800W_A:C1_07950C_A:C1_07960W_A:DIP2:MSS116:JIP5:C1_09710C_A:C1_10880W_A:C1_10950C_A:C1_10970W_A:NEP1:KRR1:C1_13820C_A:FAV3:NDT80:C2_00410C_A:C2_00820W_A:C2_00840W_A:REX2:UTP21:C2_02540W_A:C2_02710C_A:C2_04120C_A:RIM2:C2_04570W_A:C2_04820W_A:MAK5:C2_05160C_A:LAS1:MAK16:RTA2:C2_06850W_A:NOC4:RCL1:C2_07520C_A:C2_07920W_A:NSA1:KRE30:RRP8:UTP15:C2_09160W_A:RRP15:C2_09510C_A:C2_09660W_A:C2_09920W_A:PUS7:MTR2:C3_00100W_A:BUD21:C3_00420W_A:BMS1:C3_01560W_A:C3_02040C_A:UTP4:ILV2:C3_02670W_A:HBR3:CCC1:C3_04370C_A:MAK21:SFP1:CEM1:C3_05120C_A:C3_05380W_A:QDR2:C3_05800W_A:NSA2:C3_06760W_A:NOP13:C3_07550C_A:RAD4:RLP24:C4_00690C_A:RAT1:C4_01730C_A:TIM12:SAS10:HCA4:ZUO1:C4_02880C_A:NAN1:RAM1:C4_04820C_A:AGP3:C4_05010W_A:C4_05230C_A:C4_06210C_A:C4_06790W_A:C5_01430C_A:C5_02010C_A:RIX7:C5_03920C_A:C5_05340W_A:C6_01040C_A:C6_01890C_A:C6_02230W_A:C6_02430W_A:C6_04240W_A:NOP15:C7_01030C_A:DBP7:C7_02100W_A:TIM54:C7_03400C_A:ISY1:ENP2:TIM9:C7_03850W_A:C7_03880C_A:UTP18:BUD22:CR_01410C_A:CR_02030C_A:CR_02420W_A:RRP9:CR_03200C_A:CR_03240C_A:KTI12:SGD1:PRP42:CR_04110W_A:CR_04170W_A:CR_04240C_A:RPS3:MTG2:DBP8:SFL1:FGR50:NMD3:CR_07030C_A:CR_07640C_A:IMP4:CR_08000C_A:CR_08330W_A:CR_08410W_A:TSR1:CR_08500W_A:SKI2:ELF1:CR_09800C_A:UTP5:CR_10410C_A:CR_10470C_A:DRS1 |
|-------|-----------------------------|-----------------------------|-----------------------------------------|----------|-------|------------------------------------------------------------------------------------------------------------------------------------------------------------------------------------------------------------------------------------------------------------------------------------------------------------------------------------------------------------------------------------------------------------------------------------------------------------------------------------------------------------------------------------------------------------------------------------------------------------------------------------------------------------------------------------------------------------------------------------------------------------------------------------------------------------------------------------------------------------------------------------------------------------------------------------------------------------------------------------------------------------------------------------------------------------------------------------------------------------------------------------------------------------------------------------------------------------------------------------------------------------------------------------------------------------------------------------------------------------------------------------------------------------------------------|

|      |                |                             |                                         |          |       |                                                                                                                                                                                                                                                                                                                                                                                                                                                                                                                                                                                                                                                                                                                                                                                                                                                                                                                                                                                                                                                                                                                                                                                                                                                                                                                                                                                                                                                                                           |
|------|----------------|-----------------------------|-----------------------------------------|----------|-------|-------------------------------------------------------------------------------------------------------------------------------------------------------------------------------------------------------------------------------------------------------------------------------------------------------------------------------------------------------------------------------------------------------------------------------------------------------------------------------------------------------------------------------------------------------------------------------------------------------------------------------------------------------------------------------------------------------------------------------------------------------------------------------------------------------------------------------------------------------------------------------------------------------------------------------------------------------------------------------------------------------------------------------------------------------------------------------------------------------------------------------------------------------------------------------------------------------------------------------------------------------------------------------------------------------------------------------------------------------------------------------------------------------------------------------------------------------------------------------------------|
| 6396 | RNA processing | 159 out of 537 genes, 29.6% | 931 out of 6473 background genes, 14.4% | 1.12E-18 | 0.00% | CNS1:C1_01150C_A:C1_01160C_A:C1_02090C_A:PDE2:C1_02850W_A:C1_03830C_A:SEN15:C1_04040C_A:RRP6:REI1:NOP6:C1_06760C_A:C1_06800W_A:C1_07950C_A:C1_07960W_A:DIP2:MSS116:C1_08890C_A:C1_09710C_A:C1_10880W_A:C1_10950C_A:C1_10970W_A:PET127:NEP1:KRR1:C1_13820C_A:FAV3:NDT80:C2_00410C_A:C2_00820W_A:C2_00840W_A:REX2:UTP21:C2_02540W_A:C2_02710C_A:C2_04120C_A:RIM2:C2_04570W_A:C2_04820W_A:MAK5:C2_05160C_A:LAS1:MAK16:RTA2:C2_06480W_A:C2_06850W_A:NOC4:RCL1:C2_07520C_A:C2_07920W_A:NSA1:RRP8:UTP15:C2_09160W_A:RRP15:C2_09500W_A:C2_09510C_A:C2_09660W_A:C2_09920W_A:PUS7:C3_00100W_A:BUD21:C3_00420W_A:BMS1:C3_01560W_A:C3_02040C_A:UTP4:ILV2:C3_02670W_A:HBR3:CCC1:C3_04370C_A:MAK21:SFP1:CEM1:C3_05120C_A:C3_05140C_A:C3_05380W_A:QDR2:C3_05800W_A:NSA2:C3_06760W_A:NOP13:C3_07550C_A:RAD4:RLP24:C4_00690C_A:RAT1:C4_01730C_A:TIM12:SAS10:HCA4:ZUO1:C4_02880C_A:NAN1:RAM1:C4_04810C_A:AGP3:C4_05230C_A:C4_06210C_A:C4_06790W_A:C5_01430C_A:C5_02010C_A:RIX7:C5_02730C_A:C5_03920C_A:C5_05340W_A:C6_01040C_A:C6_01890C_A:C6_02230W_A:C6_02430W_A:C6_04240W_A:C6_04530C_A:NOP15:C7_01030C_A:DBP7:C7_02100W_A:C7_02340C_A:TIM54:C7_03400C_A:ISY1:ENP2:TIM9:C7_03850W_A:C7_03880C_A:UTP18:CR_00670C_A:BUD22:CR_01410C_A:CR_02030C_A:CR_02420W_A:RRP9:CR_03200C_A:CR_03240C_A:KTI12:PRP42:CR_04110W_A:CR_04170W_A:CR_04240C_A:MTG2:DBP8:SFL1:FGR50:NMD3:CR_07030C_A:CR_07640C_A:IMP4:CR_08000C_A:CR_08330W_A:CR_08410W_A:TSR1:SKI2:CR_08940W_A:CR_09800C_A:UTP5:CR_10410C_A:CR_10470C_A:DRS1 |
|------|----------------|-----------------------------|-----------------------------------------|----------|-------|-------------------------------------------------------------------------------------------------------------------------------------------------------------------------------------------------------------------------------------------------------------------------------------------------------------------------------------------------------------------------------------------------------------------------------------------------------------------------------------------------------------------------------------------------------------------------------------------------------------------------------------------------------------------------------------------------------------------------------------------------------------------------------------------------------------------------------------------------------------------------------------------------------------------------------------------------------------------------------------------------------------------------------------------------------------------------------------------------------------------------------------------------------------------------------------------------------------------------------------------------------------------------------------------------------------------------------------------------------------------------------------------------------------------------------------------------------------------------------------------|

|     |                       |                            |                                        |          |       |                                                                                                                                                                                                                                                                                                                                                                                                                                                                                                                                                                                                                                                                                                                                                                                                                                                    |
|-----|-----------------------|----------------------------|----------------------------------------|----------|-------|----------------------------------------------------------------------------------------------------------------------------------------------------------------------------------------------------------------------------------------------------------------------------------------------------------------------------------------------------------------------------------------------------------------------------------------------------------------------------------------------------------------------------------------------------------------------------------------------------------------------------------------------------------------------------------------------------------------------------------------------------------------------------------------------------------------------------------------------------|
| 966 | RNA 5'-end processing | 91 out of 537 genes, 16.9% | 421 out of 6473 background genes, 6.5% | 9.31E-16 | 0.00% | CNS1:C1_02090C_A:C1_02850W_A:C1_03830C_A:SEN15:C1_04040C_A:REI1:NOP6:C1_06800W_A:C1_07960W_A:DIP2:MSS116:C1_09710C_A:C1_10880W_A:C1_10950C_A:PET127:NEP1:C1_13820C_A:FAV3:NDT80:C2_00410C_A:C2_00820W_A:C2_02540W_A:C2_04120C_A:MAK5:C2_05160C_A:LAS1:MAK16:RTA2:C2_06850W_A:NOC4:RCL1:C2_07920W_A:NSA1:RRP8:RRP15:C2_09510C_A:C2_09920W_A:C3_00100W_A:BUD21:C3_00420W_A:BMS1:C3_02040C_A:C3_02670W_A:HBR3:C3_04370C_A:MAK21:SFP1:CEM1:C3_05800W_A:NSA2:C3_07550C_A:RAD4:RLP24:C4_00690C_A:RAT1:C4_01730C_A:SAS10:HCA4:C4_02880C_A:C4_06790W_A:C5_01430C_A:C5_02010C_A:RIX7:C5_03920C_A:C5_05340W_A:C6_02230W_A:C6_02430W_A:C6_04240W_A:DBP7:C7_03400C_A:ISY1:C7_03850W_A:C7_03880C_A:UTP18:CR_01410C_A:CR_02030C_A:CR_02420W_A:RRP9:CR_03200C_A:CR_04110W_A:DBP8:SFL1:FGR50:IMP4:CR_08000C_A:CR_08330W_A:CR_08410W_A:CR_09800C_A:CR_10410C_A:DRS1 |
|-----|-----------------------|----------------------------|----------------------------------------|----------|-------|----------------------------------------------------------------------------------------------------------------------------------------------------------------------------------------------------------------------------------------------------------------------------------------------------------------------------------------------------------------------------------------------------------------------------------------------------------------------------------------------------------------------------------------------------------------------------------------------------------------------------------------------------------------------------------------------------------------------------------------------------------------------------------------------------------------------------------------------------|

|     |                                                                                                  |                            |                                        |          |       |                                                                                                                                                                                                                                                                                                                                                                                                                                                                                                                                                                                                                                                                                                                                                                                                                                             |
|-----|--------------------------------------------------------------------------------------------------|----------------------------|----------------------------------------|----------|-------|---------------------------------------------------------------------------------------------------------------------------------------------------------------------------------------------------------------------------------------------------------------------------------------------------------------------------------------------------------------------------------------------------------------------------------------------------------------------------------------------------------------------------------------------------------------------------------------------------------------------------------------------------------------------------------------------------------------------------------------------------------------------------------------------------------------------------------------------|
| 472 | endonuclease cleavage to generate mature 5'-end of SSU-rRNA from (SSU-rRNA, 5.8S rRNA, LSU-rRNA) | 90 out of 537 genes, 16.8% | 417 out of 6473 background genes, 6.4% | 1.66E-15 | 0.00% | CNS1:C1_02090C_A:C1_02850W_A:C1_03830C_A:SEN15:C1_04040C_A:REI1:NOP6:C1_06800W_A:C1_07960W_A:DIP2:MSS116:C1_09710C_A:C1_10880W_A:C1_10950C_A:NEP1:C1_13820C_A:FAV3:NDT80:C2_00410C_A:C2_00820W_A:C2_02540W_A:C2_04120C_A:MAK5:C2_05160C_A:LAS1:MAK16:RTA2:C2_06850W_A:NOC4:RCL1:C2_07920W_A:NSA1:RRP8:RRP15:C2_09510C_A:C2_09920W_A:C3_00100W_A:BUD21:C3_00420W_A:BMS1:C3_02040C_A:C3_02670W_A:HBR3:C3_04370C_A:MAK21:SFP1:CEM1:C3_05800W_A:NSA2:C3_07550C_A:RAD4:RLP24:C4_00690C_A:RAT1:C4_01730C_A:SAS10:HCA4:C4_02880C_A:C4_06790W_A:C5_01430C_A:C5_02010C_A:RIX7:C5_03920C_A:C5_05340W_A:C6_02230W_A:C6_02430W_A:C6_04240W_A:DBP7:C7_03400C_A:ISY1:C7_03850W_A:C7_03880C_A:UTP18:CR_01410C_A:CR_02030C_A:CR_02420W_A:RRP9:CR_03200C_A:CR_04110W_A:DBP8:SFL1:FGR50:IMP4:CR_08000C_A:CR_08330W_A:CR_08410W_A:CR_09800C_A:CR_10410C_A:DRS1 |
|-----|--------------------------------------------------------------------------------------------------|----------------------------|----------------------------------------|----------|-------|---------------------------------------------------------------------------------------------------------------------------------------------------------------------------------------------------------------------------------------------------------------------------------------------------------------------------------------------------------------------------------------------------------------------------------------------------------------------------------------------------------------------------------------------------------------------------------------------------------------------------------------------------------------------------------------------------------------------------------------------------------------------------------------------------------------------------------------------|

|     |                        |                            |                                        |          |       |                                                                                                                                                                                                                                                                                                                                                                                                                                                                                                                                                                                                                                                                                                                                                                                                                                             |
|-----|------------------------|----------------------------|----------------------------------------|----------|-------|---------------------------------------------------------------------------------------------------------------------------------------------------------------------------------------------------------------------------------------------------------------------------------------------------------------------------------------------------------------------------------------------------------------------------------------------------------------------------------------------------------------------------------------------------------------------------------------------------------------------------------------------------------------------------------------------------------------------------------------------------------------------------------------------------------------------------------------------|
| 967 | rRNA 5'-end processing | 90 out of 537 genes, 16.8% | 419 out of 6473 background genes, 6.5% | 2.32E-15 | 0.00% | CNS1:C1_02090C_A:C1_02850W_A:C1_03830C_A:SEN15:C1_04040C_A:REI1:NOP6:C1_06800W_A:C1_07960W_A:DIP2:MSS116:C1_09710C_A:C1_10880W_A:C1_10950C_A:NEP1:C1_13820C_A:FAV3:NDT80:C2_00410C_A:C2_00820W_A:C2_02540W_A:C2_04120C_A:MAK5:C2_05160C_A:LAS1:MAK16:RTA2:C2_06850W_A:NOC4:RCL1:C2_07920W_A:NSA1:RRP8:RRP15:C2_09510C_A:C2_09920W_A:C3_00100W_A:BUD21:C3_00420W_A:BMS1:C3_02040C_A:C3_02670W_A:HBR3:C3_04370C_A:MAK21:SFP1:CEM1:C3_05800W_A:NSA2:C3_07550C_A:RAD4:RLP24:C4_00690C_A:RAT1:C4_01730C_A:SAS10:HCA4:C4_02880C_A:C4_06790W_A:C5_01430C_A:C5_02010C_A:RIX7:C5_03920C_A:C5_05340W_A:C6_02230W_A:C6_02430W_A:C6_04240W_A:DBP7:C7_03400C_A:ISY1:C7_03850W_A:C7_03880C_A:UTP18:CR_01410C_A:CR_02030C_A:CR_02420W_A:RRP9:CR_03200C_A:CR_04110W_A:DBP8:SFL1:FGR50:IMP4:CR_08000C_A:CR_08330W_A:CR_08410W_A:CR_09800C_A:CR_10410C_A:DRS1 |
|-----|------------------------|----------------------------|----------------------------------------|----------|-------|---------------------------------------------------------------------------------------------------------------------------------------------------------------------------------------------------------------------------------------------------------------------------------------------------------------------------------------------------------------------------------------------------------------------------------------------------------------------------------------------------------------------------------------------------------------------------------------------------------------------------------------------------------------------------------------------------------------------------------------------------------------------------------------------------------------------------------------------|

|           |                               |                                  |                                                    |          |       |                                                                                                                                                                                                                                                                                                                                                                                                                                                                                                                                                                                                                                                                                                                                                                                                                                                                                             |
|-----------|-------------------------------|----------------------------------|----------------------------------------------------|----------|-------|---------------------------------------------------------------------------------------------------------------------------------------------------------------------------------------------------------------------------------------------------------------------------------------------------------------------------------------------------------------------------------------------------------------------------------------------------------------------------------------------------------------------------------------------------------------------------------------------------------------------------------------------------------------------------------------------------------------------------------------------------------------------------------------------------------------------------------------------------------------------------------------------|
| 3447<br>1 | ncRNA<br>5'-end<br>processing | 90 out of<br>537 genes,<br>16.8% | 420 out of<br>6473<br>background<br>genes,<br>6.5% | 2.74E-15 | 0.00% | CNS1:C1_02090C_A:C1_02850W_A:C1_03830C_A:SEN15:C1_04040C_A:REI1:NOP6:<br>C1_06800W_A:C1_07960W_A:DIP2:MSS116:C1_09710C_A:C1_10880W_A:C1_1095<br>0C_A:NEP1:C1_13820C_A:FAV3:NDT80:C2_00410C_A:C2_00820W_A:C2_02540W_<br>A:C2_04120C_A:MAK5:C2_05160C_A:LAS1:MAK16:RTA2:C2_06850W_A:NOC4:RCL<br>1:C2_07920W_A:NSA1:RRP8:RRP15:C2_09510C_A:C2_09920W_A:C3_00100W_A:B<br>UD21:C3_00420W_A:BMS1:C3_02040C_A:C3_02670W_A:HBR3:C3_04370C_A:MAK<br>21:SFP1:CEM1:C3_05800W_A:NSA2:C3_07550C_A:RAD4:RLP24:C4_00690C_A:RAT1<br>:C4_01730C_A:SAS10:HCA4:C4_02880C_A:C4_06790W_A:C5_01430C_A:C5_02010<br>C_A:RIX7:C5_03920C_A:C5_05340W_A:C6_02230W_A:C6_02430W_A:C6_04240W<br>_A:DBP7:C7_03400C_A:ISY1:C7_03850W_A:C7_03880C_A:UTP18:CR_01410C_A:CR<br>_02030C_A:CR_02420W_A:RRP9:CR_03200C_A:CR_04110W_A:DBP8:SFL1:FGR50:I<br>MP4:CR_08000C_A:CR_08330W_A:CR_08410W_A:CR_09800C_A:CR_10410C_A:DR<br>S1 |
|-----------|-------------------------------|----------------------------------|----------------------------------------------------|----------|-------|---------------------------------------------------------------------------------------------------------------------------------------------------------------------------------------------------------------------------------------------------------------------------------------------------------------------------------------------------------------------------------------------------------------------------------------------------------------------------------------------------------------------------------------------------------------------------------------------------------------------------------------------------------------------------------------------------------------------------------------------------------------------------------------------------------------------------------------------------------------------------------------------|

|       |             |                            |                                        |          |       |                                                                                                                                                                                                                                                                                                                                                                                                                                                                                                                                                                                                                                                                                                                                                                                                                                             |
|-------|-------------|----------------------------|----------------------------------------|----------|-------|---------------------------------------------------------------------------------------------------------------------------------------------------------------------------------------------------------------------------------------------------------------------------------------------------------------------------------------------------------------------------------------------------------------------------------------------------------------------------------------------------------------------------------------------------------------------------------------------------------------------------------------------------------------------------------------------------------------------------------------------------------------------------------------------------------------------------------------------|
| 36260 | RNA capping | 90 out of 537 genes, 16.8% | 427 out of 6473 background genes, 6.6% | 8.58E-15 | 0.00% | CNS1:C1_02090C_A:C1_02850W_A:C1_03830C_A:SEN15:C1_04040C_A:REI1:NOP6:C1_06800W_A:C1_07960W_A:DIP2:MSS116:C1_09710C_A:C1_10880W_A:C1_10950C_A:NEP1:C1_13820C_A:FAV3:NDT80:C2_00410C_A:C2_00820W_A:C2_02540W_A:C2_04120C_A:MAK5:C2_05160C_A:LAS1:MAK16:RTA2:C2_06850W_A:NOC4:RCL1:C2_07920W_A:NSA1:RRP8:RRP15:C2_09510C_A:C2_09920W_A:C3_00100W_A:BUD21:C3_00420W_A:BMS1:C3_02040C_A:C3_02670W_A:HBR3:C3_04370C_A:MAK21:SFP1:CEM1:C3_05800W_A:NSA2:C3_07550C_A:RAD4:RLP24:C4_00690C_A:RAT1:C4_01730C_A:SAS10:HCA4:C4_02880C_A:C4_06790W_A:C5_01430C_A:C5_02010C_A:RIX7:C5_03920C_A:C5_05340W_A:C6_02230W_A:C6_02430W_A:C6_04240W_A:DBP7:C7_03400C_A:ISY1:C7_03850W_A:C7_03880C_A:UTP18:CR_01410C_A:CR_02030C_A:CR_02420W_A:RRP9:CR_03200C_A:CR_04110W_A:DBP8:SFL1:FGR50:IMP4:CR_08000C_A:CR_08330W_A:CR_08410W_A:CR_09800C_A:CR_10410C_A:DRS1 |
|-------|-------------|----------------------------|----------------------------------------|----------|-------|---------------------------------------------------------------------------------------------------------------------------------------------------------------------------------------------------------------------------------------------------------------------------------------------------------------------------------------------------------------------------------------------------------------------------------------------------------------------------------------------------------------------------------------------------------------------------------------------------------------------------------------------------------------------------------------------------------------------------------------------------------------------------------------------------------------------------------------------|

|     |                                                                                          |                            |                                        |          |       |                                                                                                                                                                                                                                                                                                                                                                                                                                                                                                                                                                                                                                                                                                                                                                                                                                                                      |
|-----|------------------------------------------------------------------------------------------|----------------------------|----------------------------------------|----------|-------|----------------------------------------------------------------------------------------------------------------------------------------------------------------------------------------------------------------------------------------------------------------------------------------------------------------------------------------------------------------------------------------------------------------------------------------------------------------------------------------------------------------------------------------------------------------------------------------------------------------------------------------------------------------------------------------------------------------------------------------------------------------------------------------------------------------------------------------------------------------------|
| 479 | endonucleolytic cleavage of tricistronic rRNA transcript (SSU-rRNA, 5.8S rRNA, LSU-rRNA) | 95 out of 537 genes, 17.7% | 473 out of 6473 background genes, 7.3% | 2.76E-14 | 0.00% | CNS1:C1_02090C_A:C1_02850W_A:C1_03830C_A:SEN15:C1_04040C_A:REI1:NOP6:C1_06800W_A:C1_07960W_A:DIP2:MSS116:C1_09710C_A:C1_10880W_A:C1_10950C_A:NEP1:KRR1:C1_13820C_A:FAV3:NDT80:C2_00410C_A:C2_00820W_A:C2_02540W_A:C2_04120C_A:MAK5:C2_05160C_A:LAS1:MAK16:RTA2:C2_06850W_A:NOC4:RCL1:C2_07920W_A:NSA1:RRP8:RRP15:C2_09510C_A:C2_09920W_A:C3_00100W_A:BUD21:C3_00420W_A:BMS1:C3_02040C_A:C3_02670W_A:HBR3:CCC1:C3_04370C_A:MAK21:SFP1:CEM1:QDR2:C3_05800W_A:NSA2:C3_07550C_A:RAD4:RLP24:C4_00690C_A:RAT1:C4_01730C_A:SAS10:HCA4:C4_02880C_A:C4_06790W_A:C5_01430C_A:C5_02010C_A:RIX7:C5_03920C_A:C5_05340W_A:C6_02230W_A:C6_02430W_A:C6_04240W_A:DBP7:C7_03400C_A:ISY1:C7_03850W_A:C7_03880C_A:UTP18:CR_01410C_A:CR_02030C_A:CR_02420W_A:RRP9:CR_03200C_A:CR_04110W_A:DBP8:SFL1:FGR50:IMP4:CR_08000C_A:CR_08330W_A:CR_08410W_A:TSR1:SKI2:CR_09800C_A:CR_10410C_A:DRS1 |
|-----|------------------------------------------------------------------------------------------|----------------------------|----------------------------------------|----------|-------|----------------------------------------------------------------------------------------------------------------------------------------------------------------------------------------------------------------------------------------------------------------------------------------------------------------------------------------------------------------------------------------------------------------------------------------------------------------------------------------------------------------------------------------------------------------------------------------------------------------------------------------------------------------------------------------------------------------------------------------------------------------------------------------------------------------------------------------------------------------------|



|       |                       |                             |                                          |          |       |                                                                                                                                                                                                                                                                                                                                                                                                                                                                                                                                                                                                                                                                                                                                                                                                                                                                                                                                                                                                                                                                                                                                                                                                                                                                                                                                                                                                                                                                                                                                                                                                                        |
|-------|-----------------------|-----------------------------|------------------------------------------|----------|-------|------------------------------------------------------------------------------------------------------------------------------------------------------------------------------------------------------------------------------------------------------------------------------------------------------------------------------------------------------------------------------------------------------------------------------------------------------------------------------------------------------------------------------------------------------------------------------------------------------------------------------------------------------------------------------------------------------------------------------------------------------------------------------------------------------------------------------------------------------------------------------------------------------------------------------------------------------------------------------------------------------------------------------------------------------------------------------------------------------------------------------------------------------------------------------------------------------------------------------------------------------------------------------------------------------------------------------------------------------------------------------------------------------------------------------------------------------------------------------------------------------------------------------------------------------------------------------------------------------------------------|
| 16070 | RNA metabolic process | 176 out of 537 genes, 32.8% | 1245 out of 6473 background genes, 19.2% | 4.14E-12 | 0.00% | BFA1:CNS1:C1_01150C_A:C1_01160C_A:C1_02090C_A:PDE2:C1_02850W_A:C1_03830C_A:SEN15:C1_04040C_A:PSF2:RRP6:REI1:NOP6:C1_06760C_A:C1_06800W_A:C1_07950C_A:C1_07960W_A:DIP2:MSS116:C1_08890C_A:C1_09710C_A:C1_10880W_A:C1_10950C_A:C1_10970W_A:PET127:NEP1:KRR1:C1_13820C_A:FAV3:NDT80:C2_00410C_A:C2_00820W_A:C2_00840W_A:REX2:C2_01870C_A:UTP21:C2_02540W_A:C2_02710C_A:C2_04120C_A:RIM2:C2_04570W_A:C2_04820W_A:CRK1:MAK5:C2_05160C_A:RPC40:LAS1:MAK16:RTA2:C2_06480W_A:C2_06850W_A:RPA12:NOC4:RCL1:C2_07520C_A:C2_07630C_A:C2_07920W_A:NSA1:RRP8:UTP15:C2_09160W_A:RRP15:C2_09500W_A:C2_09510C_A:C2_09660W_A:C2_09920W_A:PUS7:C3_00100W_A:BUD21:C3_00420W_A:BMS1:C3_01560W_A:C3_02040C_A:UTP4:ILV2:C3_02670W_A:HBR3:CCC1:C3_04370C_A:MAK21:SFP1:CEM1:C3_05120C_A:C3_05140C_A:C3_05380W_A:QDR2:C3_05800W_A:CTA4:C3_06350W_A:NSA2:C3_06760W_A:NOP13:C3_07550C_A:RAD4:RLP24:C4_00690C_A:RAT1:C4_01730C_A:TIM12:ZCF25:SAS10:HCA4:ZUO1:C4_02880C_A:NAN1:RAM1:C4_04810C_A:AGP3:C4_05230C_A:OFD1:C4_06210C_A:C4_06790W_A:C5_01430C_A:C5_02010C_A:RIX7:C5_02730C_A:C5_03920C_A:MSM1:C5_05340W_A:C6_00640C_A:C6_01040C_A:C6_01890C_A:C6_02230W_A:C6_02430W_A:FGR17:C6_04240W_A:C6_04530C_A:NOP15:C7_01030C_A:DBP7:C7_02100W_A:C7_02340C_A:TIM54:C7_03400C_A:ISY1:ENP2:TIM9:C7_03850W_A:C7_03880C_A:UTP18:CR_00670C_A:BUD22:CR_01410C_A:CR_01950W_A:CR_02030C_A:CR_02420W_A:RRP9:DOM34:CR_03200C_A:CR_03240C_A:KTI12:SGD1:PRP42:CR_04110W_A:CR_04170W_A:CR_04240C_A:MTG2:DBP8:SFL1:FGR50:NMD3:CR_07030C_A:CR_07640C_A:IMP4:CR_08000C_A:CR_08330W_A:CR_08410W_A:TSR1:SKI2:CR_08940W_A:CR_09800C_A:UTP5:CR_10410C_A:CR_10470C_A:DRS1 |
|-------|-----------------------|-----------------------------|------------------------------------------|----------|-------|------------------------------------------------------------------------------------------------------------------------------------------------------------------------------------------------------------------------------------------------------------------------------------------------------------------------------------------------------------------------------------------------------------------------------------------------------------------------------------------------------------------------------------------------------------------------------------------------------------------------------------------------------------------------------------------------------------------------------------------------------------------------------------------------------------------------------------------------------------------------------------------------------------------------------------------------------------------------------------------------------------------------------------------------------------------------------------------------------------------------------------------------------------------------------------------------------------------------------------------------------------------------------------------------------------------------------------------------------------------------------------------------------------------------------------------------------------------------------------------------------------------------------------------------------------------------------------------------------------------------|

|     |                                   |                                 |                                                     |          |       |                                                                                                                                                                                                                                                                                                                                                                                                                  |
|-----|-----------------------------------|---------------------------------|-----------------------------------------------------|----------|-------|------------------------------------------------------------------------------------------------------------------------------------------------------------------------------------------------------------------------------------------------------------------------------------------------------------------------------------------------------------------------------------------------------------------|
| 460 | maturati<br>on of<br>5.8S<br>rRNA | 43 out of<br>537 genes,<br>8.0% | 144 out of<br>6473<br>backgroun<br>d genes,<br>2.2% | 2.35E-11 | 0.00% | C1_01160C_A:C1_03830C_A:C1_04040C_A:RRP6:C1_06800W_A:C1_07960W_A:DIP<br>2:C1_09710C_A:C1_10880W_A:NEP1:KRR1:C1_13820C_A:FAV3:C2_00410C_A:C2_0<br>0820W_A:REX2:C2_02540W_A:MAK5:LAS1:MAK16:NOC4:RCL1:C2_09160W_A:RRP<br>15:BUD21:C3_01560W_A:C3_02040C_A:NSA2:RAD4:C4_00690C_A:RAT1:SAS10:C5<br>_03920C_A:C7_03400C_A:C7_03850W_A:UTP18:CR_02420W_A:RRP9:CR_03200C_<br>A:DBP8:CR_08330W_A:CR_09800C_A:CR_10410C_A |
|-----|-----------------------------------|---------------------------------|-----------------------------------------------------|----------|-------|------------------------------------------------------------------------------------------------------------------------------------------------------------------------------------------------------------------------------------------------------------------------------------------------------------------------------------------------------------------------------------------------------------------|

|     |                                                                                                                                       |                                 |                                                     |          |       |                                                                                                                                                                                                                                                                                                                                                                                                                  |
|-----|---------------------------------------------------------------------------------------------------------------------------------------|---------------------------------|-----------------------------------------------------|----------|-------|------------------------------------------------------------------------------------------------------------------------------------------------------------------------------------------------------------------------------------------------------------------------------------------------------------------------------------------------------------------------------------------------------------------|
| 466 | maturati<br>on of<br>5.8S<br>rRNA<br>from<br>tricistroni<br>c rRNA<br>transcrip<br>t (SSU-<br>rRNA,<br>5.8S<br>rRNA,<br>LSU-<br>rRNA) | 43 out of<br>537 genes,<br>8.0% | 144 out of<br>6473<br>backgroun<br>d genes,<br>2.2% | 2.35E-11 | 0.00% | C1_01160C_A:C1_03830C_A:C1_04040C_A:RRP6:C1_06800W_A:C1_07960W_A:DIP<br>2:C1_09710C_A:C1_10880W_A:NEP1:KRR1:C1_13820C_A:FAV3:C2_00410C_A:C2_0<br>0820W_A:REX2:C2_02540W_A:MAK5:LAS1:MAK16:NOC4:RCL1:C2_09160W_A:RRP<br>15:BUD21:C3_01560W_A:C3_02040C_A:NSA2:RAD4:C4_00690C_A:RAT1:SAS10:C5<br>_03920C_A:C7_03400C_A:C7_03850W_A:UTP18:CR_02420W_A:RRP9:CR_03200C_<br>A:DBP8:CR_08330W_A:CR_09800C_A:CR_10410C_A |
|-----|---------------------------------------------------------------------------------------------------------------------------------------|---------------------------------|-----------------------------------------------------|----------|-------|------------------------------------------------------------------------------------------------------------------------------------------------------------------------------------------------------------------------------------------------------------------------------------------------------------------------------------------------------------------------------------------------------------------|

|       |                                    |                            |                                        |          |       |                                                                                                                                                                                                                                                                                                                                                                                                                                                                                                                                                                                                                                                                                                                                                                                                                                                                                                                         |
|-------|------------------------------------|----------------------------|----------------------------------------|----------|-------|-------------------------------------------------------------------------------------------------------------------------------------------------------------------------------------------------------------------------------------------------------------------------------------------------------------------------------------------------------------------------------------------------------------------------------------------------------------------------------------------------------------------------------------------------------------------------------------------------------------------------------------------------------------------------------------------------------------------------------------------------------------------------------------------------------------------------------------------------------------------------------------------------------------------------|
| 42273 | ribosomal large subunit biogenesis | 97 out of 537 genes, 18.1% | 546 out of 6473 background genes, 8.4% | 5.42E-11 | 0.00% | BFA1:C1_02090C_A:PDE2:C1_02850W_A:C1_03830C_A:SEN15:C1_04040C_A:RRP6:REI1:NOP6:C1_06760C_A:C1_06800W_A:C1_07960W_A:JIP5:C1_09710C_A:C1_10970W_A:C2_00820W_A:C2_02540W_A:C2_04120C_A:C2_04570W_A:MAK5:C2_05160C_A:LAS1:MAK16:C2_06850W_A:NSA1:RRP8:UTP15:C2_09160W_A:RRP15:C2_09660W_A:C2_09920W_A:C3_00420W_A:BMS1:C3_01560W_A:C3_02040C_A:ILV2:C3_02670W_A:C3_04370C_A:MAK21:SFP1:CEM1:C3_05120C_A:C3_05380W_A:QDR2:C3_05800W_A:NSA2:C3_07550C_A:RAD4:RLP24:RAT1:C4_01730C_A:TIM12:C4_02880C_A:RAM1:AGP3:C4_05010W_A:C4_05230C_A:C4_06210C_A:C4_06790W_A:C5_01430C_A:C5_02010C_A:RIX7:C5_03920C_A:C5_05340W_A:C6_01890C_A:C6_02230W_A:C6_02430W_A:C6_04240W_A:NOP15:DBP7:C7_03400C_A:ISY1:ENP2:TIM9:C7_03850W_A:C7_03880C_A:UTP18:BUD22:CR_01410C_A:CR_02030C_A:CR_03200C_A:CR_03240C_A:SGD1:PRP42:CR_04170W_A:SFL1:CR_07640C_A:CR_08000C_A:CR_08330W_A:CR_08410W_A:TSR1:CR_08500W_A:ELF1:CR_09800C_A:CR_10470C_A:DRS1 |
|-------|------------------------------------|----------------------------|----------------------------------------|----------|-------|-------------------------------------------------------------------------------------------------------------------------------------------------------------------------------------------------------------------------------------------------------------------------------------------------------------------------------------------------------------------------------------------------------------------------------------------------------------------------------------------------------------------------------------------------------------------------------------------------------------------------------------------------------------------------------------------------------------------------------------------------------------------------------------------------------------------------------------------------------------------------------------------------------------------------|

|     |                                                                                                 |                            |                                        |          |       |                                                                                                                                                                                                                                                                                                                                                                                                                                                                                                                                                                                                                                                                                                             |
|-----|-------------------------------------------------------------------------------------------------|----------------------------|----------------------------------------|----------|-------|-------------------------------------------------------------------------------------------------------------------------------------------------------------------------------------------------------------------------------------------------------------------------------------------------------------------------------------------------------------------------------------------------------------------------------------------------------------------------------------------------------------------------------------------------------------------------------------------------------------------------------------------------------------------------------------------------------------|
| 480 | endonuclease cleavage in 5'-ETS of tricistronic rRNA transcript (SSU-rRNA, 5.8S rRNA, LSU-rRNA) | 74 out of 537 genes, 13.8% | 390 out of 6473 background genes, 6.0% | 3.12E-09 | 0.00% | CNS1:C1_02090C_A:C1_02850W_A:C1_03830C_A:SEN15:C1_04040C_A:REI1:NOP6:C1_06800W_A:C1_07960W_A:DIP2:C1_09710C_A:C1_10880W_A:NEP1:C1_13820C_A:FAV3:NDT80:C2_00410C_A:C2_00820W_A:C2_02540W_A:C2_04120C_A:C2_05160C_A:LAS1:RTA2:C2_06850W_A:NOC4:RCL1:C2_07920W_A:NSA1:RRP8:RRP15:C2_09510C_A:C3_00100W_A:BUD21:C3_00420W_A:BMS1:C3_02040C_A:C3_02670W_A:CCC1:C3_04370C_A:SFP1:QDR2:C3_05800W_A:C3_07550C_A:RAD4:C4_00690C_A:RAT1:C4_01730C_A:SAS10:C4_02880C_A:C4_06790W_A:C5_01430C_A:C5_02010C_A:RIX7:C5_03920C_A:C5_05340W_A:C6_02230W_A:C6_02430W_A:C6_04240W_A:C7_03400C_A:C7_03850W_A:UTP18:CR_02030C_A:CR_02420W_A:RRP9:CR_03200C_A:DBP8:SFL1:IMP4:CR_08000C_A:CR_08330W_A:CR_08410W_A:SKI2:CR_09800C_A |
|-----|-------------------------------------------------------------------------------------------------|----------------------------|----------------------------------------|----------|-------|-------------------------------------------------------------------------------------------------------------------------------------------------------------------------------------------------------------------------------------------------------------------------------------------------------------------------------------------------------------------------------------------------------------------------------------------------------------------------------------------------------------------------------------------------------------------------------------------------------------------------------------------------------------------------------------------------------------|

|       |                                  |                           |                                        |          |       |                                                                                                                                                                                                                                                                                                                                      |
|-------|----------------------------------|---------------------------|----------------------------------------|----------|-------|--------------------------------------------------------------------------------------------------------------------------------------------------------------------------------------------------------------------------------------------------------------------------------------------------------------------------------------|
| 27    | ribosomal large subunit assembly | 33 out of 537 genes, 6.1% | 105 out of 6473 background genes, 1.6% | 5.71E-09 | 0.00% | C1_04040C_A:RRP6:C1_06760C_A:JIP5:C1_09710C_A:C1_10970W_A:C2_02540W_A:MAK5:C2_05160C_A:BMS1:C3_01560W_A:C3_02040C_A:C3_02670W_A:C3_04370C_A:MAK21:QDR2:C4_05010W_A:C4_05230C_A:C5_05340W_A:C6_02230W_A:DBP7:C7_03400C_A:ENP2:UTP18:BUD22:CR_01410C_A:SGD1:CR_04170W_A:TSR1:ELF1:CR_09800C_A:CR_10470C_A:DRS1                         |
| 42255 | ribosome assembly                | 35 out of 537 genes, 6.5% | 125 out of 6473 background genes, 1.9% | 5.10E-08 | 0.00% | C1_04040C_A:RRP6:C1_06760C_A:JIP5:C1_09710C_A:C1_10970W_A:C2_02540W_A:C2_02710C_A:MAK5:C2_05160C_A:BMS1:C3_01560W_A:C3_02040C_A:C3_02670W_A:C3_04370C_A:MAK21:QDR2:C4_02880C_A:C4_05010W_A:C4_05230C_A:C5_05340W_A:C6_02230W_A:DBP7:C7_03400C_A:ENP2:UTP18:BUD22:CR_01410C_A:SGD1:CR_04170W_A:TSR1:ELF1:CR_09800C_A:CR_10470C_A:DRS1 |

|      |                                                  |                             |                                          |          |       |                                                                                                                                                                                                                                                                                                                                                                                                                                                                                                                                                                                                                                                                                                                                                                                                                                                                                                                                                                                                                                                                                                                                                                                                                                                                                                                                                                                                                                                                                                                                                                                                                                                                                                                                                                                                                                         |
|------|--------------------------------------------------|-----------------------------|------------------------------------------|----------|-------|-----------------------------------------------------------------------------------------------------------------------------------------------------------------------------------------------------------------------------------------------------------------------------------------------------------------------------------------------------------------------------------------------------------------------------------------------------------------------------------------------------------------------------------------------------------------------------------------------------------------------------------------------------------------------------------------------------------------------------------------------------------------------------------------------------------------------------------------------------------------------------------------------------------------------------------------------------------------------------------------------------------------------------------------------------------------------------------------------------------------------------------------------------------------------------------------------------------------------------------------------------------------------------------------------------------------------------------------------------------------------------------------------------------------------------------------------------------------------------------------------------------------------------------------------------------------------------------------------------------------------------------------------------------------------------------------------------------------------------------------------------------------------------------------------------------------------------------------|
| 6139 | nucleobase-containing compound metabolic process | 200 out of 537 genes, 37.2% | 1659 out of 6473 background genes, 25.6% | 3.57E-07 | 0.00% | BFA1:CNS1:C1_01150C_A:C1_01160C_A:C1_02090C_A:RAD16:PDE2:C1_02850W_A:C1_03830C_A:SEN15:C1_04040C_A:PSF2:RRP6:REI1:C1_05270C_A:RAD10:C1_06120C_A:NOP6:C1_06760C_A:C1_06800W_A:C1_07950C_A:C1_07960W_A:DIP2:MSS116:C1_08890C_A:C1_09710C_A:URA1:HNT1:C1_10880W_A:C1_10950C_A:C1_10970W_A:PET127:NEP1:KRR1:OSM2:C1_13820C_A:FAV3:NDT80:C2_00180C_A:C2_00410C_A:C2_00820W_A:C2_00840W_A:REX2:C2_01870C_A:UTP21:C2_02540W_A:C2_02710C_A:C2_04120C_A:RIM2:C2_04570W_A:C2_04820W_A:CRK1:MAK5:C2_05160C_A:RPC40:LAS1:MAK16:RTA2:C2_06480W_A:C2_06850W_A:AAH1:RPA12:NOC4:RCL1:C2_07520C_A:RNR22:C2_07630C_A:C2_07920W_A:NSA1:ORF298:C2_08460C_A:RRP8:UTP15:C2_09160W_A:RRP15:C2_09500W_A:C2_09510C_A:C2_09660W_A:C2_09920W_A:PUS7:C3_00100W_A:BUD21:C3_00420W_A:BMS1:C3_01560W_A:C3_02040C_A:UTP4:ILV2:C3_02670W_A:HBR3:CCC1:C3_04370C_A:MAK21:SFP1:CEM1:C3_05120C_A:C3_05140C_A:C3_05380W_A:QDR2:C3_05800W_A:CTA4:C3_06350W_A:NSA2:C3_06760W_A:NOP13:C3_07550C_A:RAD4:RLP24:C4_00690C_A:C4_00700C_A:RAT1:C4_01730C_A:TIM12:ZCF25:SAS10:HCA4:ZUO1:C4_02880C_A:NAN1:RAM1:C4_04810C_A:AGP3:C4_05230C_A:OFD1:C4_06210C_A:C4_06790W_A:C5_00800C_A:C5_01140C_A:C5_01430C_A:C5_02010C_A:RIX7:C5_02730C_A:FUR1:C5_03920C_A:C5_04360C_A:MSM1:C5_05130C_A:C5_05340W_A:C6_00640C_A:C6_01040C_A:C6_01890C_A:C6_02230W_A:C6_02410W_A:C6_02430W_A:C6_02560W_A:FGR17:C6_04240W_A:C6_04530C_A:NOP15:C7_01030C_A:DBP7:C7_02100W_A:C7_02340C_A:TIM54:DFR1:C7_03400C_A:PNC1:ISY1:ENP2:TIM9:C7_03850W_A:C7_03880C_A:UTP18:CR_00670C_A:BUD22:CR_01410C_A:CR_01950W_A:CR_02030C_A:CR_02420W_A:RRP9:DOM34:CR_03200C_A:CR_03240C_A:KTI12:SGD1:PRP42:CR_04110W_A:CR_04170W_A:CR_04240C_A:MTG2:DBP8:SFL1:FGR50:NMD3:CR_07030C_A:URA2:CR_07640C_A:IMP4:CR_08000C_A:CR_08330W_A:CR_08410W_A:TSR1:SKI2:CR_08940W_A:CR_09140C_A:CR_09800C_A:UTP5:CR_10410C_A:CR_10470C_A:DRS1 |
|------|--------------------------------------------------|-----------------------------|------------------------------------------|----------|-------|-----------------------------------------------------------------------------------------------------------------------------------------------------------------------------------------------------------------------------------------------------------------------------------------------------------------------------------------------------------------------------------------------------------------------------------------------------------------------------------------------------------------------------------------------------------------------------------------------------------------------------------------------------------------------------------------------------------------------------------------------------------------------------------------------------------------------------------------------------------------------------------------------------------------------------------------------------------------------------------------------------------------------------------------------------------------------------------------------------------------------------------------------------------------------------------------------------------------------------------------------------------------------------------------------------------------------------------------------------------------------------------------------------------------------------------------------------------------------------------------------------------------------------------------------------------------------------------------------------------------------------------------------------------------------------------------------------------------------------------------------------------------------------------------------------------------------------------------|

|       |                               |                             |                                          |          |       |                                                                                                                                                                                                                                                                                                                                                                                                                                                                                                                                                                                                                                                                                                                                                                                                                                                                                                                                                                                                                                                                                                                                                                                                                                                                                                                                                                                                                                                                                                                                                                                                                                                                                                                                                                                                                                                                         |
|-------|-------------------------------|-----------------------------|------------------------------------------|----------|-------|-------------------------------------------------------------------------------------------------------------------------------------------------------------------------------------------------------------------------------------------------------------------------------------------------------------------------------------------------------------------------------------------------------------------------------------------------------------------------------------------------------------------------------------------------------------------------------------------------------------------------------------------------------------------------------------------------------------------------------------------------------------------------------------------------------------------------------------------------------------------------------------------------------------------------------------------------------------------------------------------------------------------------------------------------------------------------------------------------------------------------------------------------------------------------------------------------------------------------------------------------------------------------------------------------------------------------------------------------------------------------------------------------------------------------------------------------------------------------------------------------------------------------------------------------------------------------------------------------------------------------------------------------------------------------------------------------------------------------------------------------------------------------------------------------------------------------------------------------------------------------|
| 46483 | heterocycle metabolic process | 205 out of 537 genes, 38.2% | 1733 out of 6473 background genes, 26.8% | 1.09E-06 | 0.00% | BFA1:CNS1:C1_01150C_A:C1_01160C_A:C1_02090C_A:RAD16:PDE2:C1_02850W_A:C1_03180W_A:C1_03830C_A:SEN15:C1_04040C_A:PSF2:RRP6:REI1:C1_05270C_A:RAD10:C1_06120C_A:NOP6:C1_06760C_A:C1_06800W_A:C1_07950C_A:C1_07960W_A:DIP2:MSS116:C1_08890C_A:C1_09710C_A:URA1:HNT1:C1_10880W_A:C1_10950C_A:C1_10970W_A:PET127:NEP1:KRR1:RIB3:OSM2:C1_13820C_A:FAV3:NDT80:C2_00180C_A:C2_00410C_A:PHHB:C2_00820W_A:C2_00840W_A:REX2:C2_01870C_A:UTP21:C2_02540W_A:C2_02710C_A:C2_04120C_A:RIM2:C2_04570W_A:C2_04820W_A:CRK1:MAK5:C2_05160C_A:RPC40:LAS1:MAK16:RTA2:C2_06480W_A:C2_06850W_A:AAH1:RPA12:NOC4:RCL1:C2_07520C_A:RNR22:C2_07630C_A:C2_07920W_A:NSA1:ORF298:C2_08460C_A:RRP8:UTP15:C2_09160W_A:RRP15:C2_09500W_A:C2_09510C_A:C2_09660W_A:C2_09920W_A:PUS7:C3_00100W_A:BUD21:C3_00420W_A:BMS1:C3_01560W_A:C3_02040C_A:UTP4:ILV2:C3_02670W_A:DAL4:YAH1:HBR3:CCC1:C3_04370C_A:MAK21:SFP1:CEM1:C3_05120C_A:C3_05140C_A:C3_05380W_A:QDR2:C3_05800W_A:CTA4:C3_06350W_A:NSA2:C3_06760W_A:NOP13:C3_07550C_A:RAD4:RLP24:C4_00690C_A:C4_00700C_A:RAT1:C4_01730C_A:TIM12:ZCF25:SAS10:HCA4:ZUO1:C4_02880C_A:NAN1:RAM1:C4_04810C_A:AGP3:C4_05230C_A:OFD1:C4_06210C_A:C4_06790W_A:C5_00800C_A:C5_01140C_A:C5_01430C_A:C5_02010C_A:RIX7:C5_02730C_A:FUR1:C5_03920C_A:C5_04360C_A:MSM1:C5_05130C_A:C5_05340W_A:C6_00640C_A:C6_01040C_A:C6_01890C_A:C6_02230W_A:C6_02410W_A:C6_02430W_A:C6_02560W_A:FGR17:C6_04240W_A:C6_04530C_A:NOP15:C7_01030C_A:DBP7:C7_02100W_A:C7_02340C_A:TIM54:DFR1:C7_03400C_A:PNC1:ISY1:ENP2:TIM9:C7_03850W_A:C7_03880C_A:UTP18:CR_00670C_A:BUD22:CR_01410C_A:CR_01950W_A:CR_02030C_A:CR_02420W_A:RRP9:DOM34:CR_03200C_A:CR_03240C_A:KTI12:SGD1:PRP42:CR_04110W_A:CR_04170W_A:CR_04240C_A:MTG2:DBP8:SFL1:FGR50:NMD3:CR_07030C_A:URA2:CR_07640C_A:IMP4:CR_08000C_A:CR_08330W_A:CR_08410W_A:TSR1:SKI2:CR_08940W_A:CR_09140C_A:CR_09800C_A:UTP5:CR_10410C_A:CR_10470C_A:DRS1 |
|-------|-------------------------------|-----------------------------|------------------------------------------|----------|-------|-------------------------------------------------------------------------------------------------------------------------------------------------------------------------------------------------------------------------------------------------------------------------------------------------------------------------------------------------------------------------------------------------------------------------------------------------------------------------------------------------------------------------------------------------------------------------------------------------------------------------------------------------------------------------------------------------------------------------------------------------------------------------------------------------------------------------------------------------------------------------------------------------------------------------------------------------------------------------------------------------------------------------------------------------------------------------------------------------------------------------------------------------------------------------------------------------------------------------------------------------------------------------------------------------------------------------------------------------------------------------------------------------------------------------------------------------------------------------------------------------------------------------------------------------------------------------------------------------------------------------------------------------------------------------------------------------------------------------------------------------------------------------------------------------------------------------------------------------------------------------|



|       |                                |                             |                                          |          |       |                                                                                                                                                                                                                                                                                                                                                                                                                                                                                                                                                                                                                                                                                                                                                                                                                                                                                                                                                                                                                                                                                                                                                                                                                                                                                                                                                                                                                                                                                                                                                                                                                                                                                                      |
|-------|--------------------------------|-----------------------------|------------------------------------------|----------|-------|------------------------------------------------------------------------------------------------------------------------------------------------------------------------------------------------------------------------------------------------------------------------------------------------------------------------------------------------------------------------------------------------------------------------------------------------------------------------------------------------------------------------------------------------------------------------------------------------------------------------------------------------------------------------------------------------------------------------------------------------------------------------------------------------------------------------------------------------------------------------------------------------------------------------------------------------------------------------------------------------------------------------------------------------------------------------------------------------------------------------------------------------------------------------------------------------------------------------------------------------------------------------------------------------------------------------------------------------------------------------------------------------------------------------------------------------------------------------------------------------------------------------------------------------------------------------------------------------------------------------------------------------------------------------------------------------------|
| 90304 | nucleic acid metabolic process | 184 out of 537 genes, 34.3% | 1509 out of 6473 background genes, 23.3% | 1.15E-06 | 0.00% | BFA1:CNS1:C1_01150C_A:C1_01160C_A:C1_02090C_A:RAD16:PDE2:C1_02850W_A:C1_03830C_A:SEN15:C1_04040C_A:PSF2:RRP6:REI1:C1_05270C_A:RAD10:C1_06120C_A:NOP6:C1_06760C_A:C1_06800W_A:C1_07950C_A:C1_07960W_A:DIP2:MSS16:C1_08890C_A:C1_09710C_A:C1_10880W_A:C1_10950C_A:C1_10970W_A:PET127:NEP1:KRR1:C1_13820C_A:FAV3:NDT80:C2_00410C_A:C2_00820W_A:C2_00840W_A:REX2:C2_01870C_A:UTP21:C2_02540W_A:C2_02710C_A:C2_04120C_A:RIM2:C2_04570W_A:C2_04820W_A:CRK1:MAK5:C2_05160C_A:RPC40:LAS1:MAK16:RTA2:C2_06480W_A:C2_06850W_A:RPA12:NOC4:RCL1:C2_07520C_A:C2_07630C_A:C2_07920W_A:NSA1:ORF298:RRP8:UTP15:C2_09160W_A:RRP15:C2_09500W_A:C2_09510C_A:C2_09660W_A:C2_09920W_A:PUS7:C3_00100W_A:BUD21:C3_00420W_A:BMS1:C3_01560W_A:C3_02040C_A:UTP4:ILV2:C3_02670W_A:HBR3:CCC1:C3_04370C_A:MAK21:SFP1:CEM1:C3_05120C_A:C3_05140C_A:C3_05380W_A:QDR2:C3_05800W_A:CTA4:C3_06350W_A:NSA2:C3_06760W_A:NOP13:C3_07550C_A:RAD4:RLP24:C4_00690C_A:C4_00700C_A:RAT1:C4_01730C_A:TIM12:ZCF25:SAS10:HCA4:ZUO1:C4_02880C_A:NAN1:RAM1:C4_04810C_A:AGP3:C4_05230C_A:OFD1:C4_06210C_A:C4_06790W_A:C5_01140C_A:C5_01430C_A:C5_02010C_A:RIX7:C5_02730C_A:C5_03920C_A:MSM1:C5_05340W_A:C6_00640C_A:C6_01040C_A:C6_01890C_A:C6_02230W_A:C6_02430W_A:FGR17:C6_04240W_A:C6_04530C_A:NOP15:C7_01030C_A:DBP7:C7_02100W_A:C7_02340C_A:TIM54:C7_03400C_A:ISY1:ENP2:TIM9:C7_03850W_A:C7_03880C_A:UTP18:CR_00670C_A:BUD22:CR_01410C_A:CR_01950W_A:CR_02030C_A:CR_02420W_A:RRP9:DOM34:CR_03200C_A:CR_03240C_A:KTI12:SGD1:PRP42:CR_04110W_A:CR_04170W_A:CR_04240C_A:MTG2:DBP8:SFL1:FGR50:NMD3:CR_07030C_A:CR_07640C_A:IMP4:CR_08000C_A:CR_08330W_A:CR_08410W_A:TSR1:SKI2:CR_08940W_A:CR_09140C_A:CR_09800C_A:UTP5:CR_10410C_A:CR_10470C_A:DRS1 |
|-------|--------------------------------|-----------------------------|------------------------------------------|----------|-------|------------------------------------------------------------------------------------------------------------------------------------------------------------------------------------------------------------------------------------------------------------------------------------------------------------------------------------------------------------------------------------------------------------------------------------------------------------------------------------------------------------------------------------------------------------------------------------------------------------------------------------------------------------------------------------------------------------------------------------------------------------------------------------------------------------------------------------------------------------------------------------------------------------------------------------------------------------------------------------------------------------------------------------------------------------------------------------------------------------------------------------------------------------------------------------------------------------------------------------------------------------------------------------------------------------------------------------------------------------------------------------------------------------------------------------------------------------------------------------------------------------------------------------------------------------------------------------------------------------------------------------------------------------------------------------------------------|

|      |                                              |                             |                                          |          |       |                                                                                                                                                                                                                                                                                                                                                                                                                                                                                                                                                                                                                                                                                                                                                                                                                                                                                                                                                                                                                                                                                                                                                                                                                                                                                                                                                                                                                                                                                                                                                                                                                                                                                                                                                                                                                                                               |
|------|----------------------------------------------|-----------------------------|------------------------------------------|----------|-------|---------------------------------------------------------------------------------------------------------------------------------------------------------------------------------------------------------------------------------------------------------------------------------------------------------------------------------------------------------------------------------------------------------------------------------------------------------------------------------------------------------------------------------------------------------------------------------------------------------------------------------------------------------------------------------------------------------------------------------------------------------------------------------------------------------------------------------------------------------------------------------------------------------------------------------------------------------------------------------------------------------------------------------------------------------------------------------------------------------------------------------------------------------------------------------------------------------------------------------------------------------------------------------------------------------------------------------------------------------------------------------------------------------------------------------------------------------------------------------------------------------------------------------------------------------------------------------------------------------------------------------------------------------------------------------------------------------------------------------------------------------------------------------------------------------------------------------------------------------------|
| 6725 | cellular aromatic compound metabolic process | 203 out of 537 genes, 37.8% | 1727 out of 6473 background genes, 26.7% | 2.53E-06 | 0.00% | <p>BFA1:CNS1:C1_01150C_A:C1_01160C_A:C1_02090C_A:RAD16:PDE2:C1_02850W_A:C1_03830C_A:SEN15:C1_04040C_A:PSF2:RRP6:REI1:C1_05270C_A:RAD10:C1_06120C_A:NOP6:C1_06760C_A:C1_06800W_A:C1_07950C_A:C1_07960W_A:DIP2:MSS116:C1_08890C_A:C1_09710C_A:URA1:HNT1:C1_10880W_A:C1_10950C_A:C1_10970W_A:PET127:NEP1:KRR1:OSM2:C1_13820C_A:FAV3:NDT80:C2_00180C_A:C2_00410C_A:PHHB:C2_00820W_A:C2_00840W_A:REX2:C2_01870C_A:UTP21:C2_02540W_A:C2_02710C_A:C2_04120C_A:RIM2:C2_04570W_A:C2_04820W_A:CRK1:MAK5:C2_05160C_A:RPC40:LAS1:MAK16:RTA2:C2_06480W_A:C2_06850W_A:AAH1:RPA12:NOC4:RCL1:C2_07520C_A:RNR22:C2_07630C_A:C2_07920W_A:NSA1:ORF298:C2_08460C_A:RRP8:UTP15:C2_09160W_A:RRP15:C2_09500W_A:C2_09510C_A:C2_09660W_A:C2_09920W_A:PUS7:C3_00100W_A:BUD21:C3_00420W_A:BMS1:C3_01560W_A:C3_02040C_A:UTP4:ILV2:C3_02670W_A:YAH1:HBR3:CCC1:C3_04370C_A:MAK21:SFP1:CEM1:C3_05120C_A:C3_05140C_A:C3_05380W_A:QDR2:C3_05800W_A:CTA4:C3_06350W_A:NSA2:C3_06760W_A:NOP13:C3_07550C_A:RAD4:RLP24:C4_00690C_A:C4_00700C_A:RAT1:C4_01730C_A:TIM12:ZCF25:SAS10:HCA4:ZUO1:C4_02880C_A:NAN1:RAM1:C4_04810C_A:AGP3:C4_05230C_A:OFD1:C4_06210C_A:C4_06790W_A:C5_00800C_A:C5_01140C_A:C5_01430C_A:C5_02010C_A:RIX7:C5_02730C_A:FUR1:C5_03920C_A:C5_04360C_A:MSM1:C5_05130C_A:C5_05340W_A:C6_00640C_A:C6_01040C_A:C6_01890C_A:C6_02230W_A:C6_02410W_A:C6_02430W_A:C6_02560W_A:FGR17:PAD1:C6_04240W_A:C6_04530C_A:NOP15:C7_01030C_A:DBP7:C7_02100W_A:C7_02340C_A:TIM54:DFR1:C7_03400C_A:PNC1:ISY1:ENP2:TIM9:C7_03850W_A:C7_03880C_A:UTP18:CR_00670C_A:BUD22:CR_01410C_A:CR_01950W_A:CR_02030C_A:CR_02420W_A:RRP9:DOM34:CR_03200C_A:CR_03240C_A:KTI12:SGD1:PRP42:CR_04110W_A:CR_04170W_A:CR_04240C_A:MTG2:DBP8:SFL1:FGR50:NMD3:CR_07030C_A:URA2:CR_07640C_A:IMP4:CR_08000C_A:CR_08330W_A:CR_08410W_A:TSR1:SKI2:CR_08940W_A:CR_09140C_A:CR_09800C_A:UTP5:CR_10410C_A:CR_10470C_A:DRS1</p> |
|------|----------------------------------------------|-----------------------------|------------------------------------------|----------|-------|---------------------------------------------------------------------------------------------------------------------------------------------------------------------------------------------------------------------------------------------------------------------------------------------------------------------------------------------------------------------------------------------------------------------------------------------------------------------------------------------------------------------------------------------------------------------------------------------------------------------------------------------------------------------------------------------------------------------------------------------------------------------------------------------------------------------------------------------------------------------------------------------------------------------------------------------------------------------------------------------------------------------------------------------------------------------------------------------------------------------------------------------------------------------------------------------------------------------------------------------------------------------------------------------------------------------------------------------------------------------------------------------------------------------------------------------------------------------------------------------------------------------------------------------------------------------------------------------------------------------------------------------------------------------------------------------------------------------------------------------------------------------------------------------------------------------------------------------------------------|

|       |                               |                             |                                          |          |       |                                                                                                                                                                                                                                                                                                                                                                                                                                                                                                                                                                                                                                                                                                                                                                                                                                                                                                                                                                                                                                                                                                                                                                                                                                                                                                                                                                                                                                                                                |
|-------|-------------------------------|-----------------------------|------------------------------------------|----------|-------|--------------------------------------------------------------------------------------------------------------------------------------------------------------------------------------------------------------------------------------------------------------------------------------------------------------------------------------------------------------------------------------------------------------------------------------------------------------------------------------------------------------------------------------------------------------------------------------------------------------------------------------------------------------------------------------------------------------------------------------------------------------------------------------------------------------------------------------------------------------------------------------------------------------------------------------------------------------------------------------------------------------------------------------------------------------------------------------------------------------------------------------------------------------------------------------------------------------------------------------------------------------------------------------------------------------------------------------------------------------------------------------------------------------------------------------------------------------------------------|
| 44085 | cellular component biogenesis | 165 out of 537 genes, 30.7% | 1340 out of 6473 background genes, 20.7% | 6.72E-06 | 0.00% | BFA1:CNS1:C1_01160C_A:RPS21:C1_02090C_A:PDE2:C1_02850W_A:C1_03830C_A:SEN15:C1_04040C_A:RRP6:REI1:NOP6:C1_06760C_A:C1_06800W_A:C1_07950C_A:C1_07960W_A:DIP2:MSS116:JIP5:C1_09710C_A:C1_10880W_A:C1_10950C_A:C1_10970W_A:NEP1:KRR1:C1_13820C_A:SIM1:FAV3:NDT80:C2_00410C_A:C2_00820W_A:C2_00840W_A:REX2:UTP21:C2_02540W_A:C2_02710C_A:MNN42:C2_04120C_A:RIM2:C2_04570W_A:C2_04820W_A:MAK5:C2_05160C_A:LAS1:MAK16:RTA2:C2_06850W_A:NOC4:RCL1:C2_07520C_A:C2_07920W_A:NSA1:KRE30:RRP8:UTP15:C2_09160W_A:RRP15:C2_09510C_A:C2_09660W_A:C2_09920W_A:PUS7:MTR2:C3_00100W_A:BUD21:C3_00420W_A:NDU1:BMS1:C3_01560W_A:C3_02040C_A:UTP4:ILV2:C3_02670W_A:YAH1:HBR3:CCC1:C3_04370C_A:MAK21:SFP1:CEM1:C3_05120C_A:C3_05380W_A:QDR2:C3_05800W_A:C3_06350W_A:NSA2:C3_06760W_A:NOP13:C3_07550C_A:RAD4:RLP24:C4_00690C_A:RAT1:C4_01730C_A:TIM12:SAS10:HCA4:ZUO1:C4_02880C_A:NAN1:RAM1:C4_04820C_A:AGP3:C4_05010W_A:C4_05230C_A:C4_06210C_A:C4_06790W_A:C5_01430C_A:C5_02010C_A:RIX7:C5_03800W_A:C5_03920C_A:C5_05340W_A:C6_01040C_A:C6_01890C_A:C6_02230W_A:C6_02430W_A:C6_04240W_A:NOP15:C7_01030C_A:DBP7:C7_02100W_A:TIM54:C7_03400C_A:ISY1:ENP2:TIM9:C7_03850W_A:C7_03880C_A:UTP18:BUD22:CR_01410C_A:CR_02030C_A:CR_02420W_A:RRP9:CR_03200C_A:CR_03240C_A:KTI12:SGD1:PRP42:CR_04110W_A:CR_04170W_A:QDR1:CR_04240C_A:RPS3:MTG2:DBP8:SFL1:FGR50:NMD3:CR_07030C_A:CR_07640C_A:IMP4:CR_08000C_A:CR_08330W_A:CR_08410W_A:TSR1:CR_08500W_A:SKI2:ELF1:CR_09800C_A:UTP5:CR_10410C_A:CR_10470C_A:DRS1 |
|-------|-------------------------------|-----------------------------|------------------------------------------|----------|-------|--------------------------------------------------------------------------------------------------------------------------------------------------------------------------------------------------------------------------------------------------------------------------------------------------------------------------------------------------------------------------------------------------------------------------------------------------------------------------------------------------------------------------------------------------------------------------------------------------------------------------------------------------------------------------------------------------------------------------------------------------------------------------------------------------------------------------------------------------------------------------------------------------------------------------------------------------------------------------------------------------------------------------------------------------------------------------------------------------------------------------------------------------------------------------------------------------------------------------------------------------------------------------------------------------------------------------------------------------------------------------------------------------------------------------------------------------------------------------------|

|     |                                                                                                                                                  |                           |                                        |          |       |                                                                                                                                                                                                                                                                |
|-----|--------------------------------------------------------------------------------------------------------------------------------------------------|---------------------------|----------------------------------------|----------|-------|----------------------------------------------------------------------------------------------------------------------------------------------------------------------------------------------------------------------------------------------------------------|
| 447 | endonuclease cleavage in ITS1 to separate SSU-rRNA from 5.8S rRNA and LSU-rRNA from tricistronic rRNA transcript (SSU-rRNA, 5.8S rRNA, LSU-rRNA) | 28 out of 537 genes, 5.2% | 103 out of 6473 background genes, 1.6% | 9.45E-06 | 0.00% | C1_04040C_A:DIP2:C1_09710C_A:C1_10880W_A:NEP1:KRR1:C1_13820C_A:FAV3:C2_00410C_A:C2_00820W_A:C2_02540W_A:NOC4:RCL1:BUD21:C3_02040C_A:RAD4:C4_00690C_A:SAS10:C5_03920C_A:C7_03850W_A:UTP18:CR_02420W_A:RRP9:CR_03200C_A:DBP8:CR_08330W_A:CR_09800C_A:CR_10410C_A |
|-----|--------------------------------------------------------------------------------------------------------------------------------------------------|---------------------------|----------------------------------------|----------|-------|----------------------------------------------------------------------------------------------------------------------------------------------------------------------------------------------------------------------------------------------------------------|

|       |                              |                           |                                        |          |       |                                                                                                                                                                                                                                                                                                                                                                                     |
|-------|------------------------------|---------------------------|----------------------------------------|----------|-------|-------------------------------------------------------------------------------------------------------------------------------------------------------------------------------------------------------------------------------------------------------------------------------------------------------------------------------------------------------------------------------------|
| 22618 | protein-RNA complex assembly | 40 out of 537 genes, 7.4% | 193 out of 6473 background genes, 3.0% | 3.47E-05 | 0.00% | C1_04040C_A:RRP6:C1_06760C_A:JIP5:C1_09710C_A:C1_10970W_A:C2_02540W_A:C2_02710C_A:MAK5:C2_05160C_A:C2_07520C_A:C3_00100W_A:BMS1:C3_01560W_A:C3_02040C_A:C3_02670W_A:C3_04370C_A:MAK21:QDR2:RLP24:C4_05010W_A:C4_05230C_A:C5_02010C_A:C5_05340W_A:C6_02230W_A:DBP7:C7_03400C_A:ISY1:ENP2:UTP18:BUD22:CR_01410C_A:SGD1:CR_04110W_A:CR_04170W_A:TSR1:ELF1:CR_09800C_A:CR_10470C_A:DRS1 |
|-------|------------------------------|---------------------------|----------------------------------------|----------|-------|-------------------------------------------------------------------------------------------------------------------------------------------------------------------------------------------------------------------------------------------------------------------------------------------------------------------------------------------------------------------------------------|

|       |                                           |                             |                                          |          |       |                                                                                                                                                                                                                                                                                                                                                                                                                                                                                                                                                                                                                                                                                                                                                                                                                                                                                                                                                                                                                                                                                                                                                                                                                                                                                                                                                                                                                                                                                                                                                                                                                                                                                                                                                                                                                                                                                                                                |
|-------|-------------------------------------------|-----------------------------|------------------------------------------|----------|-------|--------------------------------------------------------------------------------------------------------------------------------------------------------------------------------------------------------------------------------------------------------------------------------------------------------------------------------------------------------------------------------------------------------------------------------------------------------------------------------------------------------------------------------------------------------------------------------------------------------------------------------------------------------------------------------------------------------------------------------------------------------------------------------------------------------------------------------------------------------------------------------------------------------------------------------------------------------------------------------------------------------------------------------------------------------------------------------------------------------------------------------------------------------------------------------------------------------------------------------------------------------------------------------------------------------------------------------------------------------------------------------------------------------------------------------------------------------------------------------------------------------------------------------------------------------------------------------------------------------------------------------------------------------------------------------------------------------------------------------------------------------------------------------------------------------------------------------------------------------------------------------------------------------------------------------|
| 2E+06 | organic cyclic compound metabolic process | 213 out of 537 genes, 39.7% | 1903 out of 6473 background genes, 29.4% | 6.76E-05 | 0.00% | BFA1:CNS1:C1_01150C_A:C1_01160C_A:C1_02090C_A:RAD16:PDE2:C1_02850W_A:C1_03180W_A:C1_03830C_A:SEN15:C1_04040C_A:PSF2:RRP6:REI1:C1_05270C_A:RAD10:C1_06120C_A:NOP6:C1_06760C_A:C1_06800W_A:C1_07950C_A:C1_07960W_A:DIP2:MSS116:C1_08890C_A:LIP6:C1_09610W_A:C1_09710C_A:URA1:HNT1:C1_10880W_A:C1_10950C_A:C1_10970W_A:PET127:NEP1:KRR1:RIB3:OSM2:C1_13820C_A:FAV3:NDT80:C2_00180C_A:C2_00410C_A:PHHB:C2_00820W_A:C2_00840W_A:REX2:C2_01870C_A:UTP21:C2_02540W_A:C2_02710C_A:C2_04120C_A:RIM2:C2_04570W_A:C2_04820W_A:CRK1:MAK5:C2_05160C_A:RPC40:LAS1:MAK16:RTA2:C2_06480W_A:C2_06850W_A:AAH1:RPA12:NOC4:RCL1:C2_07520C_A:RNR22:C2_07630C_A:C2_07920W_A:NSA1:C2_08170W_A:ORF298:C2_08460C_A:RRP8:UTP15:C2_09160W_A:RRP15:C2_09500W_A:C2_09510C_A:C2_09660W_A:C2_09920W_A:PU57:C3_00100W_A:BUD21:C3_00420W_A:BMS1:C3_01560W_A:C3_02040C_A:UTP4:ILV2:C3_02670W_A:DAL4:YAH1:HBR3:CCC1:PTR22:C3_04370C_A:MAK21:SFP1:CEM1:C3_05120C_A:C3_05140C_A:C3_05380W_A:QDR2:C3_05800W_A:CTA4:C3_06350W_A:NSA2:C3_06760W_A:NOP13:C3_07550C_A:RAD4:RLP24:C4_00690C_A:C4_00700C_A:RAT1:C4_01730C_A:TIM12:ZCF25:SAS10:HCA4:ZUO1:C4_02880C_A:NAN1:RAM1:C4_04810C_A:AGP3:C4_05230C_A:OFD1:C4_06210C_A:C4_06790W_A:C5_00800C_A:C5_01140C_A:C5_01430C_A:C5_02010C_A:RIX7:C5_02730C_A:FUR1:C5_03920C_A:C5_04360C_A:MSM1:C5_05130C_A:C5_05340W_A:C6_00640C_A:C6_01040C_A:EBP1:C6_01890C_A:C6_02230W_A:C6_02410W_A:C6_02430W_A:C6_02560W_A:BMT4:FGR17:PAD1:C6_04240W_A:C6_04530C_A:NOP15:C7_01030C_A:DBP7:C7_02100W_A:C7_02340C_A:TIM54:DFR1:C7_03400C_A:PNC1:ISY1:ENP2:TIM9:C7_03850W_A:C7_03880C_A:UTP18:CR_00670C_A:BUD22:CR_01410C_A:CR_01950W_A:CR_02030C_A:CR_02420W_A:RRP9:DOM34:CR_03200C_A:CR_03240C_A:KTI12:SGD1:PRP42:CR_04110W_A:CR_04170W_A:QDR1:CR_04240C_A:MTG2:DBP8:SFL1:FGR50:NMD3:CR_07030C_A:URA2:CR_07640C_A:IMP4:CR_08000C_A:CR_08330W_A:CR_08410W_A:TSR1:SKI2:CR_08940W_A:CR_09140C_A:CR_09800C_A:UTP5:CR_10410C_A:CR_10470C_A:DRS1 |
|-------|-------------------------------------------|-----------------------------|------------------------------------------|----------|-------|--------------------------------------------------------------------------------------------------------------------------------------------------------------------------------------------------------------------------------------------------------------------------------------------------------------------------------------------------------------------------------------------------------------------------------------------------------------------------------------------------------------------------------------------------------------------------------------------------------------------------------------------------------------------------------------------------------------------------------------------------------------------------------------------------------------------------------------------------------------------------------------------------------------------------------------------------------------------------------------------------------------------------------------------------------------------------------------------------------------------------------------------------------------------------------------------------------------------------------------------------------------------------------------------------------------------------------------------------------------------------------------------------------------------------------------------------------------------------------------------------------------------------------------------------------------------------------------------------------------------------------------------------------------------------------------------------------------------------------------------------------------------------------------------------------------------------------------------------------------------------------------------------------------------------------|

|       |                                  |                           |                                        |          |       |                                                                                                                                                                                                                                                                                                                                                                                     |
|-------|----------------------------------|---------------------------|----------------------------------------|----------|-------|-------------------------------------------------------------------------------------------------------------------------------------------------------------------------------------------------------------------------------------------------------------------------------------------------------------------------------------------------------------------------------------|
| 71826 | protein-RNA complex organization | 40 out of 537 genes, 7.4% | 198 out of 6473 background genes, 3.1% | 7.30E-05 | 0.00% | C1_04040C_A:RRP6:C1_06760C_A:JIP5:C1_09710C_A:C1_10970W_A:C2_02540W_A:C2_02710C_A:MAK5:C2_05160C_A:C2_07520C_A:C3_00100W_A:BMS1:C3_01560W_A:C3_02040C_A:C3_02670W_A:C3_04370C_A:MAK21:QDR2:RLP24:C4_05010W_A:C4_05230C_A:C5_02010C_A:C5_05340W_A:C6_02230W_A:DBP7:C7_03400C_A:ISY1:ENP2:UTP18:BUD22:CR_01410C_A:SGD1:CR_04110W_A:CR_04170W_A:TSR1:ELF1:CR_09800C_A:CR_10470C_A:DRS1 |
|-------|----------------------------------|---------------------------|----------------------------------------|----------|-------|-------------------------------------------------------------------------------------------------------------------------------------------------------------------------------------------------------------------------------------------------------------------------------------------------------------------------------------------------------------------------------------|

|       |                                                |                             |                                          |          |       |                                                                                                                                                                                                                                                                                                                                                                                                                                                                                                                                                                                                                                                                                                                                                                                                                                                                                                                                                                                                                                                                                                                                                                                                                                                                                                                                                                                                                                                                                                                                                                                                                                                                                                                                                                                                                                                                                                                                                    |
|-------|------------------------------------------------|-----------------------------|------------------------------------------|----------|-------|----------------------------------------------------------------------------------------------------------------------------------------------------------------------------------------------------------------------------------------------------------------------------------------------------------------------------------------------------------------------------------------------------------------------------------------------------------------------------------------------------------------------------------------------------------------------------------------------------------------------------------------------------------------------------------------------------------------------------------------------------------------------------------------------------------------------------------------------------------------------------------------------------------------------------------------------------------------------------------------------------------------------------------------------------------------------------------------------------------------------------------------------------------------------------------------------------------------------------------------------------------------------------------------------------------------------------------------------------------------------------------------------------------------------------------------------------------------------------------------------------------------------------------------------------------------------------------------------------------------------------------------------------------------------------------------------------------------------------------------------------------------------------------------------------------------------------------------------------------------------------------------------------------------------------------------------------|
| 10467 | gene expression                                | 217 out of 537 genes, 40.4% | 1951 out of 6473 background genes, 30.1% | 7.93E-05 | 0.00% | BFA1:CNS1:TUF1:C1_01150C_A:C1_01160C_A:RPS21:C1_02090C_A:HOM6:PDE2:C1_02850W_A:MIA40:C1_03180W_A:C1_03830C_A:SEN15:C1_04040C_A:PSF2:RRP6:REI1:C1_05270C_A:NOP6:C1_06760C_A:C1_06800W_A:C1_07950C_A:C1_07960W_A:LTP1:DIP2:MSS116:C1_08890C_A:C1_09710C_A:C1_09910C_A:C1_10880W_A:C1_10950C_A:C1_10970W_A:PET127:NEP1:KRR1:C1_13060C_A:C1_13260W_A:OSM2:C1_13820C_A:RBE1:FAV3:NDT80:C2_00410C_A:C2_00820W_A:C2_00840W_A:C2_00880W_A:REX2:C2_01740C_A:C2_01870C_A:UTP21:C2_02540W_A:C2_02710C_A:C2_03560C_A:C2_04120C_A:RIM2:C2_04570W_A:C2_04820W_A:CRK1:MAK5:C2_05160C_A:RPC40:IDP1:LAS1:MAK16:RTA2:C2_06480W_A:C2_06850W_A:RPA12:NOC4:RCL1:C2_07520C_A:C2_07920W_A:NSA1:RRP8:UTP15:C2_09160W_A:SLP2:RRP15:C2_09500W_A:C2_09510C_A:C2_09660W_A:C2_09920W_A:PUS7:MTR2:C3_0100W_A:BUD21:C3_00420W_A:BMS1:C3_01560W_A:C3_02040C_A:UTP4:ILV2:C3_02670W_A:HBR3:CCC1:SAP9:C3_04370C_A:MAK21:SFP1:CEM1:C3_05120C_A:C3_05140C_A:C3_05380W_A:QDR2:C3_05800W_A:CTA4:C3_06350W_A:NSA2:C3_06760W_A:C3_06830C_A:NOP13:C3_07550C_A:RAD4:RLP24:C4_00690C_A:DAG7:RAT1:C4_01730C_A:TIM12:HGH1:TIM10:ZCF25:SAS10:HCA4:ZUO1:C4_02880C_A:NAN1:RAM1:C4_04810C_A:AGP3:C4_05230C_A:OFD1:C4_06210C_A:C4_06790W_A:C5_00030W_A:MET14:C5_01140C_A:C5_01430C_A:GIS2:C5_02010C_A:RIX7:C5_02730C_A:FUR1:C5_03530C_A:C5_03920C_A:C5_04290C_A:CSU57:MSM1:SDH4:C5_05340W_A:FET31:C6_00640C_A:C6_01040C_A:C6_01890C_A:C6_01980C_A:C6_02230W_A:C6_02430W_A:FGR17:C6_04240W_A:C6_04530C_A:NAG3:NOP15:YML6:C7_01030C_A:DBP7:TOM40:C7_02100W_A:C7_02340C_A:TIM54:C7_03400C_A:ISY1:ENP2:TIM9:C7_03850W_A:C7_03880C_A:UTP18:CR_00670C_A:BUD22:CR_01410C_A:CR_01950W_A:CR_02030C_A:CR_02420W_A:CR_02690W_A:RRP9:DOM34:CR_03200C_A:CR_03240C_A:KTI12:PRP42:CR_04110W_A:CR_04170W_A:CR_04240C_A:RPS3:MTG2:DBP8:ACO2:SFL1:FGR50:NMD3:CR_07030C_A:URA2:CR_07640C_A:IMP4:CR_08000C_A:CR_08330W_A:CR_08410W_A:TSR1:SKI2:CR_08940W_A:ELF1:CR_09800C_A:UTP5:CR_10400W_A:CR_10410C_A:CR_10470C_A:DRS1 |
| 9082  | branched-chain amino acid biosynthetic process | 8 out of 537 genes, 1.5%    | 12 out of 6473 background genes, 0.2%    | 0.00078  | 0.00% | LEU4:BAT21:LEU42:ILV2:ILV6:ILV3:ILV5:LEU1                                                                                                                                                                                                                                                                                                                                                                                                                                                                                                                                                                                                                                                                                                                                                                                                                                                                                                                                                                                                                                                                                                                                                                                                                                                                                                                                                                                                                                                                                                                                                                                                                                                                                                                                                                                                                                                                                                          |



|       |                                         |                           |                                        |         |       |                                                                                                                                                                                                                                                                                                                                      |
|-------|-----------------------------------------|---------------------------|----------------------------------------|---------|-------|--------------------------------------------------------------------------------------------------------------------------------------------------------------------------------------------------------------------------------------------------------------------------------------------------------------------------------------|
| 1E+05 | non-membrane-bounded organelle assembly | 35 out of 537 genes, 6.5% | 180 out of 6473 background genes, 2.8% | 0.00127 | 0.00% | C1_04040C_A:RRP6:C1_06760C_A:JIP5:C1_09710C_A:C1_10970W_A:C2_02540W_A:C2_02710C_A:MAK5:C2_05160C_A:BMS1:C3_01560W_A:C3_02040C_A:C3_02670W_A:C3_04370C_A:MAK21:QDR2:C4_02880C_A:C4_05010W_A:C4_05230C_A:C5_05340W_A:C6_02230W_A:DBP7:C7_03400C_A:ENP2:UTP18:BUD22:CR_01410C_A:SGD1:CR_04170W_A:TSR1:ELF1:CR_09800C_A:CR_10470C_A:DRS1 |
|-------|-----------------------------------------|---------------------------|----------------------------------------|---------|-------|--------------------------------------------------------------------------------------------------------------------------------------------------------------------------------------------------------------------------------------------------------------------------------------------------------------------------------------|

|           |                                                       |                                   |                                                   |         |       |                                                                                                                                                                                                                                                                                                                                                                                                                                                                                                                                                                                                                                                                                                                                                                                                                                                                                                                                                                                                                                                                                                                                                                                                                                                                                                                                                                                                                                                                                                                                                                                                                                                                                                                                                                                                                                                                                                                                                                                                                                                                                                                                                       |
|-----------|-------------------------------------------------------|-----------------------------------|---------------------------------------------------|---------|-------|-------------------------------------------------------------------------------------------------------------------------------------------------------------------------------------------------------------------------------------------------------------------------------------------------------------------------------------------------------------------------------------------------------------------------------------------------------------------------------------------------------------------------------------------------------------------------------------------------------------------------------------------------------------------------------------------------------------------------------------------------------------------------------------------------------------------------------------------------------------------------------------------------------------------------------------------------------------------------------------------------------------------------------------------------------------------------------------------------------------------------------------------------------------------------------------------------------------------------------------------------------------------------------------------------------------------------------------------------------------------------------------------------------------------------------------------------------------------------------------------------------------------------------------------------------------------------------------------------------------------------------------------------------------------------------------------------------------------------------------------------------------------------------------------------------------------------------------------------------------------------------------------------------------------------------------------------------------------------------------------------------------------------------------------------------------------------------------------------------------------------------------------------------|
| 3464<br>1 | cellular<br>nitrogen<br>compound<br>metabolic process | 240 out of<br>537 genes,<br>44.7% | 2297 out of<br>6473<br>background genes,<br>35.5% | 0.00273 | 0.00% | BFA1:CNS1:TUF1:C1_01150C_A:C1_01160C_A:RPS21:C1_02090C_A:HOM6:RAD16:<br>PDE2:C1_02850W_A:MIA40:C1_03830C_A:SEN15:C1_04040C_A:PSF2:RRP6:REI1:C1_05270C_A:RAD10:C1_05990C_A:C1_06120C_A:GLT1:NOP6:C1_06760C_A:C1_06800W_A:GCS1:C1_07950C_A:C1_07960W_A:LTP1:DIP2:MSS116:C1_08890C_A:C1_09710C_A:URA1:C1_09910C_A:HNT1:C1_10880W_A:C1_10950C_A:C1_10970W_A:PET127:NEP1:KRR1:RIB3:C1_13060C_A:C1_13330C_A:OSM2:C1_13820C_A:RBE1:FAV3:NDT80:C2_00180C_A:C2_00410C_A:PHHB:C2_00820W_A:C2_00840W_A:C2_00880W_A:REX2:C2_01740C_A:C2_01870C_A:UTP21:C2_02540W_A:C2_02710C_A:C2_03560C_A:C2_04120C_A:RIM2:C2_04570W_A:C2_04820W_A:CRK1:MAK5:C2_05160C_A:RPC40:IDP1:LAS1:MAK16:RTA2:C2_06480W_A:C2_06850W_A:AAH1:RPA12:NOC4:RCL1:C2_07520C_A:RNR22:C2_07630C_A:C2_07920W_A:NSA1:ORF298:C2_08460C_A:RRP8:UTP15:C2_09160W_A:SLP2:RRP15:C2_09500W_A:C2_09510C_A:C2_09660W_A:C2_09920W_A:PUS7:C3_00100W_A:BUD21:C3_00420W_A:BMS1:C3_01560W_A:C3_02040C_A:UTP4:ILV2:C3_02670W_A:YAH1:HBR3:CCC1:C3_04370C_A:MAK21:SFP1:CEM1:C3_05120C_A:C3_05140C_A:C3_05380W_A:QDR2:C3_05800W_A:CTA4:C3_06350W_A:NSA2:C3_06760W_A:C3_06830C_A:NOP13:C3_07550C_A:RAD4:RLP24:C4_00690C_A:C4_00700C_A:DAG7:RAT1:C4_01730C_A:TIM12:TIM10:ZCF25:SAS10:HCA4:ZUO1:C4_02880C_A:NAN1:RAM1:C4_04810C_A:AGP3:C4_05230C_A:OFD1:GDH3:C4_06210C_A:C4_06790W_A:YDC1:C5_00030W_A:MET14:C5_00800C_A:C5_01140C_A:C5_01430C_A:GIS2:C5_02010C_A:RIX7:C5_02730C_A:FUR1:C5_03530C_A:C5_03920C_A:C5_04290C_A:C5_04360C_A:CSU57:MSM1:C5_05130C_A:SDH4:C5_05340W_A:FET31:C6_00640C_A:C6_01040C_A:C6_01890C_A:C6_01980C_A:C6_02230W_A:C6_02410W_A:C6_02430W_A:C6_02560W_A:FGR17:C6_04240W_A:C6_04530C_A:NAG3:NOP15:YML6:C7_01030C_A:DBP7:TOM40:C7_02100W_A:C7_02340C_A:TIM54:DFR1:C7_03400C_A:PNC1:ISY1:ENP2:TIM9:C7_03850W_A:C7_03880C_A:UTP18:CR_00670C_A:BUD22:CR_01410C_A:CR_01950W_A:CR_02030C_A:CR_02420W_A:RRP9:DOM34:CR_03200C_A:CR_03240C_A:KTI12:SGD1:PRP42:CR_04110W_A:CR_04170W_A:CR_04240C_A:RPS3:CR_04880W_A:MTG2:DBP8:ACO2:SFL1:FGR50:NMD3:CR_07030C_A:URA2:CR_07640C_A:IMP4:CR_08000C_A:CR_08330W_A:CR_08410W_A:TSR1:SKI2:CR_08940W_A:CR_09140C_A:CR_09800C_A:UTP5:CR_10410C_A:CR_10470C_A:DRS1 |
|-----------|-------------------------------------------------------|-----------------------------------|---------------------------------------------------|---------|-------|-------------------------------------------------------------------------------------------------------------------------------------------------------------------------------------------------------------------------------------------------------------------------------------------------------------------------------------------------------------------------------------------------------------------------------------------------------------------------------------------------------------------------------------------------------------------------------------------------------------------------------------------------------------------------------------------------------------------------------------------------------------------------------------------------------------------------------------------------------------------------------------------------------------------------------------------------------------------------------------------------------------------------------------------------------------------------------------------------------------------------------------------------------------------------------------------------------------------------------------------------------------------------------------------------------------------------------------------------------------------------------------------------------------------------------------------------------------------------------------------------------------------------------------------------------------------------------------------------------------------------------------------------------------------------------------------------------------------------------------------------------------------------------------------------------------------------------------------------------------------------------------------------------------------------------------------------------------------------------------------------------------------------------------------------------------------------------------------------------------------------------------------------------|

|     |                                                                                                                                       |                                  |                                                     |         |       |                                                                                                                                                                                                                                                                                                                                                                                                                                                                                                                                                                                                                                                    |
|-----|---------------------------------------------------------------------------------------------------------------------------------------|----------------------------------|-----------------------------------------------------|---------|-------|----------------------------------------------------------------------------------------------------------------------------------------------------------------------------------------------------------------------------------------------------------------------------------------------------------------------------------------------------------------------------------------------------------------------------------------------------------------------------------------------------------------------------------------------------------------------------------------------------------------------------------------------------|
| 463 | maturati<br>on of<br>LSU-<br>rRNA<br>from<br>tricistroni<br>c rRNA<br>transcrip<br>t (SSU-<br>rRNA,<br>5.8S<br>rRNA,<br>LSU-<br>rRNA) | 63 out of<br>537 genes,<br>11.7% | 429 out of<br>6473<br>backgroun<br>d genes,<br>6.6% | 0.00346 | 0.00% | C1_02090C_A:PDE2:C1_02850W_A:C1_03830C_A:SEN15:REI1:NOP6:C1_06800W_A<br>:C1_07960W_A:C2_00820W_A:C2_02540W_A:C2_04120C_A:MAK5:LAS1:MAK16:C<br>2_06850W_A:RRP8:UTP15:C2_09160W_A:RRP15:C2_09920W_A:C3_00420W_A:C3<br>_01560W_A:ILV2:C3_02670W_A:C3_04370C_A:CEM1:C3_05120C_A:C3_05380W_A<br>:QDR2:C3_05800W_A:NSA2:C3_07550C_A:RAT1:C4_01730C_A:TIM12:C4_02880C_<br>A:RAM1:AGP3:C4_06210C_A:C4_06790W_A:C5_01430C_A:C5_02010C_A:C5_0392<br>0C_A:C6_01890C_A:C6_02230W_A:C6_02430W_A:C6_04240W_A:NOP15:DBP7:C7<br>_03400C_A:ISY1:TIM9:C7_03850W_A:C7_03880C_A:CR_02030C_A:CR_03200C_A:C<br>R_03240C_A:PRP42:CR_04170W_A:SFL1:CR_07640C_A:CR_08000C_A |
|-----|---------------------------------------------------------------------------------------------------------------------------------------|----------------------------------|-----------------------------------------------------|---------|-------|----------------------------------------------------------------------------------------------------------------------------------------------------------------------------------------------------------------------------------------------------------------------------------------------------------------------------------------------------------------------------------------------------------------------------------------------------------------------------------------------------------------------------------------------------------------------------------------------------------------------------------------------------|

|     |                                   |                                  |                                                     |         |       |                                                                                                                                                                                                                                                                                                                                                                                                                                                                                                                                                                                                                                                    |
|-----|-----------------------------------|----------------------------------|-----------------------------------------------------|---------|-------|----------------------------------------------------------------------------------------------------------------------------------------------------------------------------------------------------------------------------------------------------------------------------------------------------------------------------------------------------------------------------------------------------------------------------------------------------------------------------------------------------------------------------------------------------------------------------------------------------------------------------------------------------|
| 470 | maturati<br>on of<br>LSU-<br>rRNA | 63 out of<br>537 genes,<br>11.7% | 431 out of<br>6473<br>backgroun<br>d genes,<br>6.7% | 0.00406 | 0.00% | C1_02090C_A:PDE2:C1_02850W_A:C1_03830C_A:SEN15:REI1:NOP6:C1_06800W_A<br>:C1_07960W_A:C2_00820W_A:C2_02540W_A:C2_04120C_A:MAK5:LAS1:MAK16:C<br>2_06850W_A:RRP8:UTP15:C2_09160W_A:RRP15:C2_09920W_A:C3_00420W_A:C3<br>_01560W_A:ILV2:C3_02670W_A:C3_04370C_A:CEM1:C3_05120C_A:C3_05380W_A<br>:QDR2:C3_05800W_A:NSA2:C3_07550C_A:RAT1:C4_01730C_A:TIM12:C4_02880C_<br>A:RAM1:AGP3:C4_06210C_A:C4_06790W_A:C5_01430C_A:C5_02010C_A:C5_0392<br>0C_A:C6_01890C_A:C6_02230W_A:C6_02430W_A:C6_04240W_A:NOP15:DBP7:C7<br>_03400C_A:ISY1:TIM9:C7_03850W_A:C7_03880C_A:CR_02030C_A:CR_03200C_A:C<br>R_03240C_A:PRP42:CR_04170W_A:SFL1:CR_07640C_A:CR_08000C_A |
|-----|-----------------------------------|----------------------------------|-----------------------------------------------------|---------|-------|----------------------------------------------------------------------------------------------------------------------------------------------------------------------------------------------------------------------------------------------------------------------------------------------------------------------------------------------------------------------------------------------------------------------------------------------------------------------------------------------------------------------------------------------------------------------------------------------------------------------------------------------------|

|       |                               |                             |                                          |         |       |                                                                                                                                                                                                                                                                                                                                                                                                                                                                                                                                                                                                                                                                                                                                                                                                                                                                                                                                                                                                                                                                                                                                                                                                                                                                                                                                                                                                                                                                                                                                                                                                                                                                                                                                                                                                                                                                                                                                                                                                                                                                                                                                                                                                             |
|-------|-------------------------------|-----------------------------|------------------------------------------|---------|-------|-------------------------------------------------------------------------------------------------------------------------------------------------------------------------------------------------------------------------------------------------------------------------------------------------------------------------------------------------------------------------------------------------------------------------------------------------------------------------------------------------------------------------------------------------------------------------------------------------------------------------------------------------------------------------------------------------------------------------------------------------------------------------------------------------------------------------------------------------------------------------------------------------------------------------------------------------------------------------------------------------------------------------------------------------------------------------------------------------------------------------------------------------------------------------------------------------------------------------------------------------------------------------------------------------------------------------------------------------------------------------------------------------------------------------------------------------------------------------------------------------------------------------------------------------------------------------------------------------------------------------------------------------------------------------------------------------------------------------------------------------------------------------------------------------------------------------------------------------------------------------------------------------------------------------------------------------------------------------------------------------------------------------------------------------------------------------------------------------------------------------------------------------------------------------------------------------------------|
| 44249 | cellular biosynthetic process | 255 out of 537 genes, 47.5% | 2485 out of 6473 background genes, 38.4% | 0.00463 | 0.00% | LEU4:BFA1:CNS1:TUF1:C1_01150C_A:C1_01160C_A:RPS21:C1_02090C_A:HOM6:LYS2:PDE2:C1_02850W_A:MIA40:C1_03180W_A:C1_03830C_A:SEN15:C1_04040C_A:RHD1:PSF2:RRP6:REI1:C1_05270C_A:RAD10:C1_05990C_A:GLT1:NOP6:C1_06760C_A:C1_06800W_A:GCS1:C1_07950C_A:C1_07960W_A:LTP1:DIP2:MSS116:C1_08890C_A:LIP6:C1_09710C_A:URA1:C1_09910C_A:C1_10880W_A:C1_10950C_A:C1_10970W_A:PET127:NEP1:KRR1:RIB3:C1_13060C_A:C1_13260W_A:C1_13330C_A:OSM2:C1_13820C_A:RBE1:FAV3:NDT80:C2_00410C_A:PHHB:C2_00820W_A:C2_00840W_A:C2_00880W_A:REX2:C2_01740C_A:C2_01870C_A:UTP21:C2_02540W_A:C2_02710C_A:C2_03560C_A:MNN42:C2_04120C_A:BAT21:LYS22:RIM2:C2_04570W_A:C2_04820W_A:CRK1:MAK5:C2_05160C_A:RPC40:IDP1:LAS1:MAK16:RTA2:C2_06480W_A:C2_06850W_A:AAH1:RPA12:NOC4:RCL1:C2_07520C_A:RNR22:C2_07920W_A:NSA1:ORF298:RRP8:UTP15:C2_09160W_A:SLP2:RRP15:C2_09500W_A:C2_09510C_A:C2_09660W_A:LEU42:C2_09920W_A:PUS7:MTR2:C3_00100W_A:BUD21:C3_00420W_A:BMS1:C3_01560W_A:C3_02040C_A:UTP4:ILV2:C3_02670W_A:MET13:YAH1:HB3:CCC1:SAP9:C3_04370C_A:MAK21:SFP1:CEM1:C3_05120C_A:C3_05140C_A:C3_05380W_A:QDR2:C3_05800W_A:CTA4:C3_06350W_A:NSA2:C3_06760W_A:C3_06830C_A:NOP13:C3_07550C_A:RAD4:RLP24:C4_00690C_A:DAG7:RAT1:ILV6:C4_01730C_A:TIM12:HGH1:TIM10:ZCF25:SAS10:HCA4:ZUO1:C4_02880C_A:NAN1:RAM1:C4_04810C_A:AGP3:C4_05230C_A:OFD1:HOM3:GDH3:C4_06210C_A:C4_06790W_A:MET16:YDC1:C5_00030W_A:MET14:C5_00800C_A:C5_01140C_A:C5_01430C_A:GIS2:C5_02010C_A:RIX7:THR4:C5_02730C_A:FUR1:C5_03530C_A:C5_03920C_A:C5_04290C_A:CSU57:MSM1:C5_05130C_A:SDH4:C5_05340W_A:ILV3:FET31:C6_00640C_A:ILV5:C6_01040C_A:C6_01890C_A:C6_01980C_A:C6_02230W_A:C6_02430W_A:FR17:C6_04240W_A:C6_04530C_A:NAG3:NOP15:YML6:C7_01030C_A:DBP7:TOM40:C7_02100W_A:C7_02340C_A:TIM54:DFR1:C7_03400C_A:PNC1:ISY1:ENP2:TIM9:C7_03850W_A:C7_03880C_A:UTP18:C7_04210C_A:LEU1:CR_00570W_A:CR_00670C_A:BUD22:LYS12:CR_01410C_A:CR_01950W_A:CR_02030C_A:CR_02420W_A:CR_02690W_A:RRP9:DOM34:CR_03200C_A:CR_03240C_A:KTI12:PRP42:CR_04110W_A:CR_04170W_A:CR_04240C_A:RPS3:CR_04880W_A:MTG2:DBP8:ACO2:SFL1:FGR50:NMD3:CR_07030C_A:URA2:CR_07640C_A:IMP4:CR_08000C_A:CR_08330W_A:CR_08410W_A:TSR1:SKI2:CR_08940W_A:ELF1:CR_09800C_A:UTP5:CR_10400W_A:CR_10410C_A:CR_10470C_A:DRS1 |
|-------|-------------------------------|-----------------------------|------------------------------------------|---------|-------|-------------------------------------------------------------------------------------------------------------------------------------------------------------------------------------------------------------------------------------------------------------------------------------------------------------------------------------------------------------------------------------------------------------------------------------------------------------------------------------------------------------------------------------------------------------------------------------------------------------------------------------------------------------------------------------------------------------------------------------------------------------------------------------------------------------------------------------------------------------------------------------------------------------------------------------------------------------------------------------------------------------------------------------------------------------------------------------------------------------------------------------------------------------------------------------------------------------------------------------------------------------------------------------------------------------------------------------------------------------------------------------------------------------------------------------------------------------------------------------------------------------------------------------------------------------------------------------------------------------------------------------------------------------------------------------------------------------------------------------------------------------------------------------------------------------------------------------------------------------------------------------------------------------------------------------------------------------------------------------------------------------------------------------------------------------------------------------------------------------------------------------------------------------------------------------------------------------|

|      |                      |                             |                                          |         |       |                                                                                                                                                                                                                                                                                                                                                                                                                                                                                                                                                                                                                                                                                                                                                                                                                                                                                                                                                                                                                                                                                                                                                                                                                                                                                                                                                                                                                                                                                                                                                                                                                                                                                                                                                                                                                                                                                                                                                                                                                                                                                                                                                                                                                                                                |
|------|----------------------|-----------------------------|------------------------------------------|---------|-------|----------------------------------------------------------------------------------------------------------------------------------------------------------------------------------------------------------------------------------------------------------------------------------------------------------------------------------------------------------------------------------------------------------------------------------------------------------------------------------------------------------------------------------------------------------------------------------------------------------------------------------------------------------------------------------------------------------------------------------------------------------------------------------------------------------------------------------------------------------------------------------------------------------------------------------------------------------------------------------------------------------------------------------------------------------------------------------------------------------------------------------------------------------------------------------------------------------------------------------------------------------------------------------------------------------------------------------------------------------------------------------------------------------------------------------------------------------------------------------------------------------------------------------------------------------------------------------------------------------------------------------------------------------------------------------------------------------------------------------------------------------------------------------------------------------------------------------------------------------------------------------------------------------------------------------------------------------------------------------------------------------------------------------------------------------------------------------------------------------------------------------------------------------------------------------------------------------------------------------------------------------------|
| 9058 | biosynthetic process | 263 out of 537 genes, 49.0% | 2586 out of 6473 background genes, 40.0% | 0.00605 | 0.00% | LEU4:BFA1:CNS1:TUF1:C1_01150C_A:C1_01160C_A:RPS21:C1_02090C_A:HOM6:LYS2:PDE2:C1_02850W_A:MIA40:C1_03180W_A:C1_03830C_A:SEN15:C1_04040C_A:RHD1:PSF2:RRP6:REI1:C1_05270C_A:RAD10:C1_05990C_A:GLT1:NOP6:C1_06760C_A:C1_06800W_A:GCS1:C1_07950C_A:C1_07960W_A:LTP1:DIP2:MSS116:C1_08890C_A:LIP6:C1_09610W_A:C1_09710C_A:URA1:C1_09910C_A:C1_10880W_A:C1_10950C_A:C1_10970W_A:PET127:NEP1:KRR1:RIB3:C1_13060C_A:C1_13260W_A:C1_13330C_A:OSM2:C1_13820C_A:RBE1:FAV3:NDT80:C2_00410C_A:PHHB:C2_00820W_A:C2_00840W_A:C2_00880W_A:REX2:C2_01740C_A:C2_01870C_A:UTP21:C2_02540W_A:BNA32:C2_02710C_A:C2_03560C_A:MNN42:C2_04120C_A:BAT21:LYS22:RIM2:C2_04570W_A:C2_04820W_A:CRK1:MAK5:C2_05160C_A:RPC40:IDP1:LAS1:MAK16:RTA2:C2_06480W_A:C2_06850W_A:AAH1:RPA12:NOC4:RCL1:C2_07520C_A:RNR22:C2_07920W_A:NSA1:ORF298:RRP8:UTP15:C2_09160W_A:SLP2:RRP15:C2_09500W_A:C2_09510C_A:C2_09660W_A:LEU42:C2_09920W_A:GPD1:PUS7:MTR2:C3_00100W_A:RHR2:BUD21:C3_00420W_A:NDU1:BMS1:C3_01560W_A:C3_02040C_A:UTP4:ILV2:C3_02670W_A:MET13:YAH1:HBR3:CCC1:PTR22:SAP9:C3_04370C_A:MAK21:SFP1:CEM1:C3_05120C_A:C3_05140C_A:C3_05380W_A:QDR2:C3_05800W_A:CTA4:C3_06350W_A:NSA2:C3_06760W_A:C3_06830C_A:NOP13:C3_07550C_A:RAD4:RLP24:C4_00690C_A:DAG7:RAT1:ILV6:C4_01730C_A:TIM12:HGH1:TIM10:ZCF25:SAS10:HCA4:ZUO1:C4_02880C_A:NAN1:RAM1:C4_04810C_A:AGP3:C4_05230C_A:OFD1:HOM3:GDH3:C4_06210C_A:C4_06790W_A:MET16:YDC1:C5_00030W_A:MET14:C5_00800C_A:C5_01140C_A:C5_01430C_A:GIS2:C5_02010C_A:RIX7:THR4:C5_02730C_A:FUR1:C5_03530C_A:C5_03920C_A:C5_04290C_A:CSU57:MSM1:C5_05130C_A:SDH4:C5_05340W_A:ILV3:FET31:C6_00640C_A:ILV5:C6_01040C_A:C6_01890C_A:C6_01980C_A:C6_02230W_A:C6_02430W_A:BMT4:FGR17:C6_04240W_A:C6_04530C_A:NAG3:NOP15:YML6:C7_01030C_A:DBP7:TOM40:C7_02100W_A:C7_02340C_A:TIM54:DFR1:C7_03400C_A:PNC1:ISY1:ENP2:TIM9:C7_03850W_A:C7_03880C_A:UTP18:C7_04210C_A:LEU1:CR_00570W_A:CR_00670C_A:BUD22:LYS12:CR_01410C_A:CR_01950W_A:CR_02030C_A:CR_02420W_A:CR_02690W_A:RRP9:DOM34:CR_03200C_A:CR_03240C_A:KTI12:PRP42:CR_04110W_A:CR_04170W_A:QDR1:CR_04240C_A:RPS3:CR_04880W_A:MTG2:DBP8:ACO2:SFL1:FGR50:NMD3:CR_07030C_A:URA2:CR_07640C_A:IMP4:CR_08000C_A:CR_08330W_A:CR_08410W_A:TSR1:SKI2:CR_08940W_A:ELF1:CR_09800C_A:UTP5:CR_10400W_A:CR_10410C_A:CR_10470C_A:DRS1 |
|------|----------------------|-----------------------------|------------------------------------------|---------|-------|----------------------------------------------------------------------------------------------------------------------------------------------------------------------------------------------------------------------------------------------------------------------------------------------------------------------------------------------------------------------------------------------------------------------------------------------------------------------------------------------------------------------------------------------------------------------------------------------------------------------------------------------------------------------------------------------------------------------------------------------------------------------------------------------------------------------------------------------------------------------------------------------------------------------------------------------------------------------------------------------------------------------------------------------------------------------------------------------------------------------------------------------------------------------------------------------------------------------------------------------------------------------------------------------------------------------------------------------------------------------------------------------------------------------------------------------------------------------------------------------------------------------------------------------------------------------------------------------------------------------------------------------------------------------------------------------------------------------------------------------------------------------------------------------------------------------------------------------------------------------------------------------------------------------------------------------------------------------------------------------------------------------------------------------------------------------------------------------------------------------------------------------------------------------------------------------------------------------------------------------------------------|

|       |                                        |                             |                                          |         |       |                                                                                                                                                                                                                                                                                                                                                                                                                                                                                                                                                                                                                                                                                                                                                                                                                                                                                                                                                                                                                                                                                                                                                                                                                                                                                                                                                                                                                                                                                                                                                                                                                                                                                                                                                                                                                                                                                                                                                                                                                                                                                                                                                                                                                                                     |
|-------|----------------------------------------|-----------------------------|------------------------------------------|---------|-------|-----------------------------------------------------------------------------------------------------------------------------------------------------------------------------------------------------------------------------------------------------------------------------------------------------------------------------------------------------------------------------------------------------------------------------------------------------------------------------------------------------------------------------------------------------------------------------------------------------------------------------------------------------------------------------------------------------------------------------------------------------------------------------------------------------------------------------------------------------------------------------------------------------------------------------------------------------------------------------------------------------------------------------------------------------------------------------------------------------------------------------------------------------------------------------------------------------------------------------------------------------------------------------------------------------------------------------------------------------------------------------------------------------------------------------------------------------------------------------------------------------------------------------------------------------------------------------------------------------------------------------------------------------------------------------------------------------------------------------------------------------------------------------------------------------------------------------------------------------------------------------------------------------------------------------------------------------------------------------------------------------------------------------------------------------------------------------------------------------------------------------------------------------------------------------------------------------------------------------------------------------|
| 2E+06 | organic substance biosynthetic process | 261 out of 537 genes, 48.6% | 2571 out of 6473 background genes, 39.7% | 0.00816 | 0.00% | LEU4:BFA1:CNS1:TUF1:C1_01150C_A:C1_01160C_A:RPS21:C1_02090C_A:HOM6:LYS2:PDE2:C1_02850W_A:MIA40:C1_03180W_A:C1_03830C_A:SEN15:C1_04040C_A:RHD1:PSF2:RRP6:REI1:C1_05270C_A:RAD10:C1_05990C_A:GLT1:NOP6:C1_06760C_A:C1_06800W_A:GCS1:C1_07950C_A:C1_07960W_A:LTP1:DIP2:MSS116:C1_08890C_A:LIP6:C1_09610W_A:C1_09710C_A:URA1:C1_09910C_A:C1_10880W_A:C1_10950C_A:C1_10970W_A:PET127:NEP1:KRR1:RIB3:C1_13060C_A:C1_13260W_A:C1_13330C_A:OSM2:C1_13820C_A:RBE1:FAV3:NDT80:C2_00410C_A:PHHB:C2_00820W_A:C2_00840W_A:C2_00880W_A:REX2:C2_01740C_A:C2_01870C_A:UTP21:C2_02540W_A:C2_02710C_A:C2_03560C_A:MNN42:C2_04120C_A:BAT21:LYS22:RIM2:C2_04570W_A:C2_04820W_A:CRK1:MAK5:C2_05160C_A:RPC40:IDP1:LAS1:MAK16:RTA2:C2_06480W_A:C2_06850W_A:AAH1:RPA12:NOC4:RCL1:C2_07520C_A:RNR22:C2_07920W_A:NSA1:ORF298:RRP8:UTP15:C2_09160W_A:SLP2:RRP15:C2_09500W_A:C2_09510C_A:C2_09660W_A:LEU42:C2_09920W_A:GPD1:PUS7:MTR2:C3_00100W_A:RHR2:BUD21:C3_00420W_A:BMS1:C3_01560W_A:C3_02040C_A:UTP4:ILV2:C3_02670W_A:MET13:YAH1:HBR3:CCC1:PTR22:SAP9:C3_04370C_A:MAK21:SFP1:CEM1:C3_05120C_A:C3_05140C_A:C3_05380W_A:QDR2:C3_05800W_A:CTA4:C3_06350W_A:NSA2:C3_06760W_A:C3_06830C_A:NOP13:C3_07550C_A:RAD4:RLP24:C4_00690C_A:DAG7:RAT1:ILV6:C4_01730C_A:TIM12:HGH1:TIM10:ZCF25:SAS10:HCA4:ZUO1:C4_02880C_A:NAN1:RAM1:C4_04810C_A:AGP3:C4_05230C_A:OFD1:HOM3:GDH3:C4_06210C_A:C4_06790W_A:MET16:YDC1:C5_00030W_A:MET14:C5_00800C_A:C5_01140C_A:C5_01430C_A:GIS2:C5_02010C_A:RIX7:THR4:C5_02730C_A:FUR1:C5_03530C_A:C5_03920C_A:C5_04290C_A:CSU57:MSM1:C5_05130C_A:SDH4:C5_05340W_A:ILV3:FET31:C6_00640C_A:ILV5:C6_01040C_A:C6_01890C_A:C6_01980C_A:C6_02230W_A:C6_02430W_A:BMT4:FGR17:C6_04240W_A:C6_04530C_A:NAG3:NOP15:YML6:C7_01030C_A:DBP7:TOM40:C7_02100W_A:C7_02340C_A:TIM54:DFR1:C7_03400C_A:PNC1:ISY1:ENP2:TIM9:C7_03850W_A:C7_03880C_A:UTP18:C7_04210C_A:LEU1:CR_00570W_A:CR_00670C_A:BUD22:LYS12:CR_01410C_A:CR_01950W_A:CR_02030C_A:CR_02420W_A:CR_02690W_A:RRP9:DOM34:CR_03200C_A:CR_03240C_A:KTI12:PRP42:CR_04110W_A:CR_04170W_A:QDR1:CR_04240C_A:RPS3:CR_04880W_A:MTG2:DBP8:ACO2:SFL1:FGR50:NMD3:CR_07030C_A:URA2:CR_07640C_A:IMP4:CR_08000C_A:CR_08330W_A:CR_08410W_A:TSR1:SKI2:CR_08940W_A:ELF1:CR_09800C_A:UTP5:CR_10400W_A:CR_10410C_A:CR_10470C_A:DRS1 |
|-------|----------------------------------------|-----------------------------|------------------------------------------|---------|-------|-----------------------------------------------------------------------------------------------------------------------------------------------------------------------------------------------------------------------------------------------------------------------------------------------------------------------------------------------------------------------------------------------------------------------------------------------------------------------------------------------------------------------------------------------------------------------------------------------------------------------------------------------------------------------------------------------------------------------------------------------------------------------------------------------------------------------------------------------------------------------------------------------------------------------------------------------------------------------------------------------------------------------------------------------------------------------------------------------------------------------------------------------------------------------------------------------------------------------------------------------------------------------------------------------------------------------------------------------------------------------------------------------------------------------------------------------------------------------------------------------------------------------------------------------------------------------------------------------------------------------------------------------------------------------------------------------------------------------------------------------------------------------------------------------------------------------------------------------------------------------------------------------------------------------------------------------------------------------------------------------------------------------------------------------------------------------------------------------------------------------------------------------------------------------------------------------------------------------------------------------------|

|       |                                                          |                           |                                        |         |       |                                                                                                                                                                                                                                                                                                                                      |
|-------|----------------------------------------------------------|---------------------------|----------------------------------------|---------|-------|--------------------------------------------------------------------------------------------------------------------------------------------------------------------------------------------------------------------------------------------------------------------------------------------------------------------------------------|
| 71035 | nuclear polyadenylation-dependent rRNA catabolic process | 8 out of 537 genes, 1.5%  | 15 out of 6473 background genes, 0.2%  | 0.00817 | 0.00% | C1_01160C_A:C1_03830C_A:RRP6:C1_06800W_A:C1_07960W_A:C2_09160W_A:RAT1:C7_03400C_A                                                                                                                                                                                                                                                    |
| 1510  | RNA methylation                                          | 12 out of 537 genes, 2.2% | 35 out of 6473 background genes, 0.5%  | 0.01336 | 0.00% | C1_01150C_A:NEP1:C2_06480W_A:RRP8:C3_05140C_A:C4_04810C_A:C6_04530C_A:C7_02340C_A:CR_00670C_A:CR_02030C_A:CR_04170W_A:CR_08940W_A                                                                                                                                                                                                    |
| 44282 | small molecule catabolic process                         | 23 out of 537 genes, 4.3% | 108 out of 6473 background genes, 1.7% | 0.01893 | 0.00% | GOR1:DUR1,2:ANT1:MLS1:BAT21:GLO2:FOX2:POX1-3:C3_06860C_A:DLD2:CAR2:SOU1:C5_00800C_A:CSU57:GCV1:PAD1:POT1:CRC1:CR_04880W_A:URA2:ECI1:CR_09670C_A:UGA3                                                                                                                                                                                 |
| 70925 | organelle assembly                                       | 35 out of 537 genes, 6.5% | 203 out of 6473 background genes, 3.1% | 0.02103 | 0.00% | C1_04040C_A:RRP6:C1_06760C_A:JIP5:C1_09710C_A:C1_10970W_A:C2_02540W_A:C2_02710C_A:MAK5:C2_05160C_A:BMS1:C3_01560W_A:C3_02040C_A:C3_02670W_A:C3_04370C_A:MAK21:QDR2:C4_02880C_A:C4_05010W_A:C4_05230C_A:C5_05340W_A:C6_02230W_A:DBP7:C7_03400C_A:ENP2:UTP18:BUD22:CR_01410C_A:SGD1:CR_04170W_A:TSR1:ELF1:CR_09800C_A:CR_10470C_A:DRS1 |



|       |                                                           |                          |                                       |         |       |                                                                                   |
|-------|-----------------------------------------------------------|--------------------------|---------------------------------------|---------|-------|-----------------------------------------------------------------------------------|
| 43633 | polyadenylation-dependent RNA catabolic process           | 8 out of 537 genes, 1.5% | 17 out of 6473 background genes, 0.3% | 0.02659 | 0.00% | C1_01160C_A:C1_03830C_A:RRP6:C1_06800W_A:C1_07960W_A:C2_09160W_A:RAT1:C7_03400C_A |
| 43634 | polyadenylation-dependent ncRNA catabolic process         | 8 out of 537 genes, 1.5% | 17 out of 6473 background genes, 0.3% | 0.02659 | 0.00% | C1_01160C_A:C1_03830C_A:RRP6:C1_06800W_A:C1_07960W_A:C2_09160W_A:RAT1:C7_03400C_A |
| 71029 | nuclear ncRNA surveillance                                | 8 out of 537 genes, 1.5% | 17 out of 6473 background genes, 0.3% | 0.02659 | 0.00% | C1_01160C_A:C1_03830C_A:RRP6:C1_06800W_A:C1_07960W_A:C2_09160W_A:RAT1:C7_03400C_A |
| 71046 | nuclear polyadenylation-dependent ncRNA catabolic process | 8 out of 537 genes, 1.5% | 17 out of 6473 background genes, 0.3% | 0.02659 | 0.00% | C1_01160C_A:C1_03830C_A:RRP6:C1_06800W_A:C1_07960W_A:C2_09160W_A:RAT1:C7_03400C_A |
| 9081  | branched-chain amino acid metabolic process               | 8 out of 537 genes, 1.5% | 17 out of 6473 background genes, 0.3% | 0.02659 | 0.00% | LEU4:BAT21:LEU42:ILV2:ILV6:ILV3:ILV5:LEU1                                         |

|       |                                     |                             |                                          |         |       |                                                                                                                                                                                                                                                                                                                                                                                                                                                                                                                                                                                                                                                                                                                                                                                                                                                                                                                                                                                                                                                                                                                                                                                                                                                                                                                                                                                                                                                                                                                                                                                                                                                                                                                                                                                                                                                                                                                                                                                                                                                                                                                                                                                          |
|-------|-------------------------------------|-----------------------------|------------------------------------------|---------|-------|------------------------------------------------------------------------------------------------------------------------------------------------------------------------------------------------------------------------------------------------------------------------------------------------------------------------------------------------------------------------------------------------------------------------------------------------------------------------------------------------------------------------------------------------------------------------------------------------------------------------------------------------------------------------------------------------------------------------------------------------------------------------------------------------------------------------------------------------------------------------------------------------------------------------------------------------------------------------------------------------------------------------------------------------------------------------------------------------------------------------------------------------------------------------------------------------------------------------------------------------------------------------------------------------------------------------------------------------------------------------------------------------------------------------------------------------------------------------------------------------------------------------------------------------------------------------------------------------------------------------------------------------------------------------------------------------------------------------------------------------------------------------------------------------------------------------------------------------------------------------------------------------------------------------------------------------------------------------------------------------------------------------------------------------------------------------------------------------------------------------------------------------------------------------------------------|
| 71025 | RNA surveillance                    | 9 out of 537 genes, 1.7%    | 23 out of 6473 background genes, 0.4%    | 0.04968 | 0.04% | C1_01160C_A:C1_03830C_A:RRP6:C1_06800W_A:C1_07960W_A:C2_09160W_A:RAT1:C7_03400C_A:DOM34                                                                                                                                                                                                                                                                                                                                                                                                                                                                                                                                                                                                                                                                                                                                                                                                                                                                                                                                                                                                                                                                                                                                                                                                                                                                                                                                                                                                                                                                                                                                                                                                                                                                                                                                                                                                                                                                                                                                                                                                                                                                                                  |
| 6807  | nitrogen compound metabolic process | 328 out of 537 genes, 61.1% | 3438 out of 6473 background genes, 53.1% | 0.06298 | 0.08% | LEU4:BFA1:CNS1:TUF1:C1_01150C_A:C1_01160C_A:RPS21:C1_02090C_A:HOM6:RAD16:LYS2:PDE2:C1_02850W_A:MIA40:GOR1:C1_03180W_A:C1_03430W_A:C1_03830C_A:SEN15:C1_04040C_A:GPM2:DUR1,2:RHD1:PSF2:RRP6:REI1:C1_05270C_A:RAD10:C1_05990C_A:C1_06120C_A:GLT1:NOP6:C1_06760C_A:NPR1:C1_06800W_A:CAT1:RME1:GCS1:C1_07950C_A:C1_07960W_A:LTP1:DIP2:CAF16:MSS116:C1_08890C_A:AOX1:DAK2:LIP6:C1_09610W_A:MLS1:C1_09710C_A:URA1:C1_09910C_A:HNT1:C1_10880W_A:C1_10950C_A:C1_10970W_A:PET127:NEP1:KRR1:RIB3:C1_13060C_A:C1_13260W_A:C1_13330C_A:OSM2:C1_13820C_A:MET3:RBE1:FAV3:NDT80:C2_00180C_A:C2_00410C_A:PHHB:C2_00820W_A:C2_00840W_A:C2_00880W_A:REX2:C2_01740C_A:C2_01870C_A:UTP21:C2_02490C_A:C2_02540W_A:C2_02710C_A:AMO1:C2_03130W_A:C2_03560C_A:C2_03700W_A:C2_03830W_A:C2_04120C_A:BAT21:LYS22:RIM2:C2_04570W_A:C2_04820W_A:CRK1:C2_05060C_A:MAK5:C2_05160C_A:RPC40:IDP1:LAS1:MAK16:RTA2:C2_06480W_A:C2_06850W_A:AAH1:C2_07070W_A:RCK2:RPA12:NOC4:RCL1:C2_07520C_A:RNR22:C2_07630C_A:C2_07920W_A:NSA1:ARA1:C2_08200W_A:ORF298:C2_08460C_A:RRP8:UTP15:C2_09160W_A:SLP2:GLO2:C2_09280C_A:RRP15:C2_09500W_A:C2_09510C_A:C2_09660W_A:LEU42:C2_09920W_A:PUS7:C3_00100W_A:BUD21:C3_00420W_A:BMS1:C3_01560W_A:C3_02040C_A:UTP4:C3_02140C_A:ILV2:CCP1:C3_02670W_A:MET13:DAL4:YAH1:HBR3:CCC1:SAP9:AGT1:C3_04370C_A:MAK21:SFP1:CEM1:C3_05120C_A:C3_05140C_A:C3_05380W_A:QDR2:C3_05800W_A:CTA4:CYM1:C3_06350W_A:NSA2:C3_06760W_A:C3_06830C_A:C3_06860C_A:NOP13:C3_07550C_A:RAD4:CAR2:RLP24:C4_00690C_A:C4_00700C_A:DAG7:RAT1:BMT9:ILV6:C4_01470W_A:C4_01730C_A:TIM12:C4_01830C_A:HGH1:TIM10:ZCF25:HOS3:AHP1:SAS10:HCA4:ZUO1:C4_02880C_A:NAN1:C4_03050C_A:RAM1:SAP10:C4_04500C_A:C4_04810C_A:AGP3:C4_05230C_A:OFD1:HOM3:GDH3:C4_06210C_A:SOU2:SOU1:C4_06790W_A:MET16:YDC1:C5_00030W_A:MET14:C5_00800C_A:TFS1:C5_01140C_A:C5_01430C_A:GLR1:GIS2:C5_02010C_A:HSP12:C5_02110W_A:RIX7:THR4:C5_02690W_A:C5_02730C_A:FUR1:C5_03530C_A:C5_03920C_A:C5_04290C_A:C5_04360C_A:CSU57:MSM1:C5_05130C_A:SDH4:C5_05340W_A:ILV3:C5_05440C_A:FET31:C6_00640C_A:C6_00760W_A:ILV5:KAR5:C6_01040C_A:C6_01890C_A:C6_01980C_A:C6_02230W_A:C6_02410W_A:C6_02430W_A:GCV1:C6_02560W_A:FGR17:C6_04240W_A:C6_04530C_A:NAG3:NOP15:YML6:C |

|  |  |  |  |  |  |                                                                                                                                                                                                                                                                                                                                                                                                                                                                                                                                                                                                                                          |
|--|--|--|--|--|--|------------------------------------------------------------------------------------------------------------------------------------------------------------------------------------------------------------------------------------------------------------------------------------------------------------------------------------------------------------------------------------------------------------------------------------------------------------------------------------------------------------------------------------------------------------------------------------------------------------------------------------------|
|  |  |  |  |  |  | 7_01030C_A:DBP7:TOM40:C7_02100W_A:C7_02340C_A:C7_03030W_A:TIM54:DFR1:C7_03400C_A:PNC1:ISY1:ENP2:TIM9:C7_03850W_A:C7_03880C_A:UTP18:C7_04210C_A:LEU1:CR_00670C_A:BUD22:LYS12:CR_01410C_A:CSP37:CR_01950W_A:CRC1:CR_02030C_A:CR_02420W_A:CR_02690W_A:RRP9:ERV1:DOM34:CR_03200C_A:CR_03240C_A:IFR2:KTI12:SGD1:PRP42:CR_03760W_A:CR_04110W_A:CR_04170W_A:CR_04240C_A:RPS3:CR_04880W_A:YCP4:MTG2:DBP8:ACO2:SFL1:SOK1:FGR50:NMD3:CR_07030C_A:URA2:CR_07480W_A:CR_07640C_A:IMP4:CR_08000C_A:CR_08330W_A:CR_08410W_A:TSR1:SKI2:NIT2:PDK2:CR_08940W_A:SLP3:CR_09140C_A:CR_09310W_A:CR_09800C_A:UGA3:UTP5:CR_10400W_A:CR_10410C_A:CR_10470C_A:DRS1 |
|--|--|--|--|--|--|------------------------------------------------------------------------------------------------------------------------------------------------------------------------------------------------------------------------------------------------------------------------------------------------------------------------------------------------------------------------------------------------------------------------------------------------------------------------------------------------------------------------------------------------------------------------------------------------------------------------------------------|

|       |                                     |                             |                                          |         |       |                                                                                                                                                                                                                                                                                                                                                                                                                                                                                                                                                                                                                                                                                                                                                                                                                                                                                                                                                                                                                                                                                                                                                                                                                                                                                                                                                                                                                                                                                                                                                                                                                                                                                                                                                                                                                                                                                                                                                                                                                                                                                                                                                                                                                                                                                                                                                                                                                                                                                                                                                                                                                                                                            |
|-------|-------------------------------------|-----------------------------|------------------------------------------|---------|-------|----------------------------------------------------------------------------------------------------------------------------------------------------------------------------------------------------------------------------------------------------------------------------------------------------------------------------------------------------------------------------------------------------------------------------------------------------------------------------------------------------------------------------------------------------------------------------------------------------------------------------------------------------------------------------------------------------------------------------------------------------------------------------------------------------------------------------------------------------------------------------------------------------------------------------------------------------------------------------------------------------------------------------------------------------------------------------------------------------------------------------------------------------------------------------------------------------------------------------------------------------------------------------------------------------------------------------------------------------------------------------------------------------------------------------------------------------------------------------------------------------------------------------------------------------------------------------------------------------------------------------------------------------------------------------------------------------------------------------------------------------------------------------------------------------------------------------------------------------------------------------------------------------------------------------------------------------------------------------------------------------------------------------------------------------------------------------------------------------------------------------------------------------------------------------------------------------------------------------------------------------------------------------------------------------------------------------------------------------------------------------------------------------------------------------------------------------------------------------------------------------------------------------------------------------------------------------------------------------------------------------------------------------------------------------|
| 71704 | organic substance metabolic process | 352 out of 537 genes, 65.5% | 3737 out of 6473 background genes, 57.7% | 0.06787 | 0.11% | <p>LEU4:BFA1:CNS1:TUF1:C1_01150C_A:C1_01160C_A:RPS21:C1_02090C_A:HOM6:RAD16:LYS2:PDE2:C1_02850W_A:MIA40:GOR1:C1_03180W_A:C1_03430W_A:C1_03830C_A:SEN15:C1_04040C_A:GPM2:DUR1,2:RHD1:PSF2:RRP6:REI1:C1_05270C_A:RAD10:C1_05990C_A:C1_06120C_A:GLT1:ANT1:NOP6:C1_06760C_A:NPR1:C1_06800W_A:CAT1:RME1:GCS1:C1_07950C_A:C1_07960W_A:LTP1:DIP2:CAF16:MSS116:C1_08890C_A:AOX1:DAK2:LIP6:C1_09610W_A:MLS1:C1_09710C_A:URA1:C1_09910C_A:HNT1:C1_10880W_A:C1_10950C_A:C1_10970W_A:PET127:NEP1:KRR1:RIB3:C1_13060C_A:C1_13260W_A:C1_13330C_A:CYB2:OSM2:C1_13820C_A:MET3:RBE1:FAV3:NDT80:C2_00180C_A:C2_00410C_A:PHHB:C2_00820W_A:C2_00840W_A:C2_00880W_A:REX2:C2_01740C_A:C2_01870C_A:UTP21:C2_02490C_A:C2_02540W_A:C2_02710C_A:AMO1:C2_03130W_A:C2_03560C_A:MNN42:C2_03700W_A:C2_03830W_A:C2_04120C_A:BAT21:LYS22:RIM2:C2_04570W_A:C2_04820W_A:CRK1:C2_05060C_A:MAK5:C2_05160C_A:RPC40:IDP1:LAS1:MAK16:RTA2:C2_06480W_A:C2_06850W_A:AAH1:C2_07070W_A:RCK2:RPA12:NOC4:RCL1:C2_07520C_A:RNR22:C2_07630C_A:C2_07920W_A:NSA1:ARA1:C2_08170W_A:C2_08200W_A:ORF298:C2_08460C_A:RRP8:UTP15:C2_09160W_A:SLP2:GLO2:C2_09280C_A:RRP15:C2_09500W_A:C2_09510C_A:C2_09660W_A:LEU42:C2_09920W_A:GPD1:PUS7:MTR2:C3_00100W_A:RHR2:BUD21:C3_00420W_A:FOX2:BMS1:C3_01560W_A:POX1-3:C3_02040C_A:UTP4:C3_02140C_A:ILV2:CCP1:C3_02670W_A:FAA21:MET13:DAL4:YAH1:HBR3:CCC1:PTR22:SAP9:AGT1:C3_04370C_A:MAK21:SFP1:CEM1:C3_05120C_A:C3_05140C_A:C3_05380W_A:QDR2:C3_05800W_A:CTA4:CYM1:C3_06350W_A:NSA2:C3_06760W_A:C3_06830C_A:C3_06860C_A:YSA1:NOP13:DLD2:C3_07550C_A:RAD4:CAR2:RLP24:C4_00690C_A:C4_00700C_A:DAG7:RAT1:BMT9:ILV6:C4_01470W_A:C4_01730C_A:TIM12:C4_01830C_A:HGH1:TIM10:ZCF25:HOS3:AHP1:C4_02620C_A:SAS10:HCA4:ZUO1:C4_02880C_A:NAN1:C4_03050C_A:RAM1:SAP10:C4_04500C_A:C4_04810C_A:AGP3:C4_05230C_A:OFD1:HOM3:GDH3:C4_06210C_A:SOU2:SOU1:C4_06790W_A:MET16:YDC1:C5_00030W_A:MET14:C5_00800C_A:TFS1:C5_01140C_A:C5_01430C_A:GLR1:GIS2:C5_02010C_A:HSP12:C5_02110W_A:RIX7:THR4:C5_02690W_A:C5_02730C_A:FUR1:C5_03530C_A:C5_03920C_A:C5_04290C_A:C5_04360C_A:CSU57:MSM1:C5_05130C_A:SDH4:C5_05340W_A:ILV3:C5_05440C_A:FET31:C6_00640C_A:C6_00760W_A:ILV5:KAR5:C6_01040C_A:EBP1:C6_01890C_A:C6_01980C_A:C6_02230W_A:C6_02410W_A:C6_02430W_A:GCV1:C6_02560W_A:BMT4:C6_03470W_A:FGR17:PAD1:C6_04240W_A:PEX11:C6_04530C_A:NAG3:NOP15:YML6:C7_01030C_A:DBP7:TOM40:C7_02100W_A:C7_02340C_A:C7_03030W_A:TIM54:DFR1:C7_03400C_A:PNC1:ISY1:ENP2:TIM9:C7_03850W_A:C7_03880C_A:UTP18:C7_04210C_A:POT1:LEU1:CR_00570W_A:CR_00670C_A:BUD22:LYS12:CR_01410C_A:CSP37:CR_01950W_A:CRC1:CR_02030C_A:CR_02420W_A:CR_02690W_A:RRP9:ERV1:DOM34:CR_03200C_A:CR_03240C_A:IFR2:KTI12:SGD1:PRP42:CR_03760W_A:CR_</p> |
|-------|-------------------------------------|-----------------------------|------------------------------------------|---------|-------|----------------------------------------------------------------------------------------------------------------------------------------------------------------------------------------------------------------------------------------------------------------------------------------------------------------------------------------------------------------------------------------------------------------------------------------------------------------------------------------------------------------------------------------------------------------------------------------------------------------------------------------------------------------------------------------------------------------------------------------------------------------------------------------------------------------------------------------------------------------------------------------------------------------------------------------------------------------------------------------------------------------------------------------------------------------------------------------------------------------------------------------------------------------------------------------------------------------------------------------------------------------------------------------------------------------------------------------------------------------------------------------------------------------------------------------------------------------------------------------------------------------------------------------------------------------------------------------------------------------------------------------------------------------------------------------------------------------------------------------------------------------------------------------------------------------------------------------------------------------------------------------------------------------------------------------------------------------------------------------------------------------------------------------------------------------------------------------------------------------------------------------------------------------------------------------------------------------------------------------------------------------------------------------------------------------------------------------------------------------------------------------------------------------------------------------------------------------------------------------------------------------------------------------------------------------------------------------------------------------------------------------------------------------------------|

|           |                                                        |                                 |                                                    |         |       |                                                                                                                                                                                                                                                                                                                                                |
|-----------|--------------------------------------------------------|---------------------------------|----------------------------------------------------|---------|-------|------------------------------------------------------------------------------------------------------------------------------------------------------------------------------------------------------------------------------------------------------------------------------------------------------------------------------------------------|
|           |                                                        |                                 |                                                    |         |       | 04110W_A:CR_04170W_A:QDR1:CR_04240C_A:RPS3:CR_04880W_A:YCP4:MTG2:D<br>BP8:ACO2:SFL1:SOK1:FGR50:NMD3:CR_07030C_A:URA2:CR_07480W_A:CR_07640<br>C_A:IMP4:CR_08000C_A:CR_08330W_A:CR_08410W_A:TSR1:SKI2:ECI1:PDK2:CR_0<br>8940W_A:SLP3:CR_09140C_A:CR_09310W_A:ELF1:CR_09670C_A:CR_09800C_A:UG<br>A3:UTP5:CR_10400W_A:CR_10410C_A:CR_10470C_A:DRS1 |
| 2E+0<br>6 | alpha-<br>amino<br>acid<br>biosynth<br>etic<br>process | 19 out of<br>537 genes,<br>3.5% | 87 out of<br>6473<br>backgroun<br>d genes,<br>1.3% | 0.06974 | 0.11% | LEU4:HOM6:LYS2:GLT1:BAT21:LYS22:IDP1:LEU42:ILV2:MET13:HOM3:GDH3:MET16:<br>THR4:DFR1:C7_04210C_A:LEU1:LYS12:CR_04880W_A                                                                                                                                                                                                                         |

| 19752                                 | carboxylic acid metabolic process | 50 out of 537 genes, 9.3%  | 349 out of 6473 background genes, 5.4% | 0.07323           | 0.11%                | LEU4:HOM6:LYS2:GOR1:C1_03180W_A:GPM2:C1_05990C_A:GLT1:ANT1:MLS1:C1_13330C_A:CYB2:MET3:BAT21:LYS22:IDP1:ARA1:GLO2:LEU42:FOX2:POX1-3:ILV2:FAA21:MET13:CCC1:DLD2:CAR2:ILV6:HOM3:GDH3:MET16:MET14:C5_00800C_A:THR4:MSM1:ILV3:ILV5:GCV1:PAD1:PEX11:DFR1:C7_04210C_A:POT1:LEU1:LYS12:CRC1:CR_04880W_A:URA2:ECI1:UGA3                                              |
|---------------------------------------|-----------------------------------|----------------------------|----------------------------------------|-------------------|----------------------|-------------------------------------------------------------------------------------------------------------------------------------------------------------------------------------------------------------------------------------------------------------------------------------------------------------------------------------------------------------|
|                                       |                                   |                            |                                        |                   |                      |                                                                                                                                                                                                                                                                                                                                                             |
| <b>S20 vs B20 Downregulated genes</b> |                                   |                            |                                        |                   |                      |                                                                                                                                                                                                                                                                                                                                                             |
| GOID                                  | GO_term                           | Cluster frequency          | Background frequency                   | Corrected P-value | False discovery rate | Gene(s) annotated to the term                                                                                                                                                                                                                                                                                                                               |
| 8643                                  | carbohydrate transport            | 55 out of 182 genes, 30.2% | 585 out of 6473 background genes, 9.0% | 7.26E-14          | 0.00%                | POL93:HGT2:GAL1:GAL10:EHD3:ICL1:C1_05160C_A:C1_06000W_A:C1_07980C_A:PFY1:MLS1:GCA1:AMO1:HSP21:DCK1:C2_05130W_A:RHO2:GDH2:DDR48:IRO1:GFA1:C3_02290W_A:FAA21:AAP1:CDR11:C3_04630W_A:C3_05550C_A:RCT1:AHR1:FBP1:C4_00860C_A:CAT2:AMS1:RBT1:HWP1:FAV1:CSR1:HAP41:ZRT101:GPR1:PGA37:C5_04470C_A:CUP9:OPT1:ADH5:IDP2:WOR3:LAP3:FDH1:FRE7:ECI1:SLP3:CHS2:CDG1:PLB3 |

|       |                                      |                            |                                          |         |       |                                                                                                                                                                                                                                                                                                                                                                                                                         |
|-------|--------------------------------------|----------------------------|------------------------------------------|---------|-------|-------------------------------------------------------------------------------------------------------------------------------------------------------------------------------------------------------------------------------------------------------------------------------------------------------------------------------------------------------------------------------------------------------------------------|
| 42710 | biofilm formation                    | 16 out of 182 genes, 8.8%  | 155 out of 6473 background genes, 2.4%   | 0.00372 | 0.00% | BRG1:GCA1:YVC1:RAS1:TEC1:ZCF31:AHR1:PGA10:CAT2:HWP1:PHR1:CSR1:MRV8:ALS1:ADH5:WOR3                                                                                                                                                                                                                                                                                                                                       |
| 98630 | aggregation of unicellular organisms | 16 out of 182 genes, 8.8%  | 155 out of 6473 background genes, 2.4%   | 0.00372 | 0.00% | BRG1:GCA1:YVC1:RAS1:TEC1:ZCF31:AHR1:PGA10:CAT2:HWP1:PHR1:CSR1:MRV8:ALS1:ADH5:WOR3                                                                                                                                                                                                                                                                                                                                       |
| 98743 | cell aggregation                     | 16 out of 182 genes, 8.8%  | 155 out of 6473 background genes, 2.4%   | 0.00372 | 0.00% | BRG1:GCA1:YVC1:RAS1:TEC1:ZCF31:AHR1:PGA10:CAT2:HWP1:PHR1:CSR1:MRV8:ALS1:ADH5:WOR3                                                                                                                                                                                                                                                                                                                                       |
| 71702 | organic substance transport          | 66 out of 182 genes, 36.3% | 1458 out of 6473 background genes, 22.5% | 0.00838 | 0.00% | POL93:HGT2:GAL1:GAL10:EHD3:POR1:ICL1:C1_05160C_A:C1_06000W_A:C1_07980C_A:PFY1:MLS1:ECM21:GCA1:DDI1:GDI1:AMO1:HSP21:DCK1:C2_05130W_A:RTA2:YVC1:RHO2:GDH2:DDR48:IRO1:GFA1:C3_02290W_A:FAA21:AAP1:CDR11:C3_04630W_A:ZCF31:NCE102:C3_05550C_A:RCT1:AHR1:FBP1:PEX5:PGA10:C4_00860C_A:CAT2:AMS1:RBT1:HWP1:OSH3:FAV1:CSR1:HAP41:ZRT101:GPR1:PGA37:C5_04470C_A:CUP9:OPT1:ADH5:IDP2:WOR3:LAP3:FDH1:FRE7:ECI1:SLP3:CHS2:CDG1:PLB3 |

|       |                                            |                           |                                        |         |       |                                                                    |
|-------|--------------------------------------------|---------------------------|----------------------------------------|---------|-------|--------------------------------------------------------------------|
| 44282 | small molecule catabolic process           | 12 out of 182 genes, 6.6% | 108 out of 6473 background genes, 1.7% | 0.02713 | 0.00% | GAL1:GAL10:ICL1:MLS1:GDH2:PEX5:CAT2:AMS1:LAP3:FDH1:ECI1:CDG1       |
| 44242 | cellular lipid catabolic process           | 7 out of 182 genes, 3.8%  | 36 out of 6473 background genes, 0.6%  | 0.03128 | 0.29% | ICL1:MLS1:PEX5:CAT2:GDE1:ECI1:PLB3                                 |
| 90609 | single-species submerged biofilm formation | 13 out of 182 genes, 7.1% | 132 out of 6473 background genes, 2.0% | 0.04672 | 0.50% | BRG1:GCA1:RAS1:TEC1:ZCF31:AHR1:PGA10:CAT2:HWP1:PHR1:CSR1:ALS1:ADH5 |
| 90605 | submerged biofilm formation                | 13 out of 182 genes, 7.1% | 135 out of 6473 background genes, 2.1% | 0.05896 | 0.44% | BRG1:GCA1:RAS1:TEC1:ZCF31:AHR1:PGA10:CAT2:HWP1:PHR1:CSR1:ALS1:ADH5 |
| 9062  | fatty acid catabolic process               | 5 out of 182 genes, 2.7%  | 18 out of 6473 background genes, 0.3%  | 0.0639  | 0.60% | ICL1:MLS1:PEX5:CAT2:ECI1                                           |



| 60256           | regulation of flocculation                              | 4 out of 182 genes, 2.2%  | 10 out of 6473 background genes, 0.2%  | 0.06717           | 0.55%                | GAL10:RLM1:SFL2:ALS1                                               |  |  |
|-----------------|---------------------------------------------------------|---------------------------|----------------------------------------|-------------------|----------------------|--------------------------------------------------------------------|--|--|
| 44010           | single-species biofilm formation                        | 13 out of 182 genes, 7.1% | 138 out of 6473 background genes, 2.1% | 0.07387           | 0.50%                | BRG1:GCA1:RAS1:TEC1:ZCF31:AHR1:PGA10:CAT2:HWP1:PHR1:CSR1:ALS1:ADH5 |  |  |
| 44011           | single-species biofilm formation on inanimate substrate | 12 out of 182 genes, 6.6% | 120 out of 6473 background genes, 1.9% | 0.07646           | 0.46%                | BRG1:GCA1:RAS1:TEC1:ZCF31:PGA10:CAT2:HWP1:PHR1:CSR1:ALS1:ADH5      |  |  |
|                 |                                                         |                           |                                        |                   |                      |                                                                    |  |  |
| S45 vs B45 Down |                                                         |                           |                                        |                   |                      |                                                                    |  |  |
| GOID            | GO_term                                                 | Cluster frequency         | Background frequency                   | Corrected P-value | False discovery rate | Gene(s) annotated to the term                                      |  |  |

|      |                                                          |                           |                                        |          |       |                                                                                                                                                                                                                     |
|------|----------------------------------------------------------|---------------------------|----------------------------------------|----------|-------|---------------------------------------------------------------------------------------------------------------------------------------------------------------------------------------------------------------------|
| 6302 | double-strand break repair                               | 30 out of 372 genes, 8.1% | 120 out of 6473 background genes, 1.9% | 3.29E-09 | 0.00% | CHL4:POL32:C1_06630W_A: CDC54:IRR1:RFA1:ESC4: CDC21: CDC46:RFA2: MCM3: PDS5: C2_08380C_A: SGS1: RDH54: POL1: C3_04740C_A: CAC1: C4_05790W_A: PRI2: EXO1: YBL053: CTF5: SMC6: MMS22: CTF18: RAD51: ALG5: SMC1: CDC28 |
| 724  | double-strand break repair via homologous recombination  | 24 out of 372 genes, 6.5% | 80 out of 6473 background genes, 1.2%  | 7.89E-09 | 0.00% | CHL4:POL32:C1_06630W_A: CDC54:IRR1:RFA1: CDC21: CDC46:RFA2: MCM3: PDS5: C2_08380C_A: SGS1: RDH54: C3_04740C_A: CAC1: C4_05790W_A: YBL053: CTF5: SMC6: MMS22: CTF18: RAD51: ALG5                                     |
| 727  | double-strand break repair via break-induced replication | 19 out of 372 genes, 5.1% | 53 out of 6473 background genes, 0.8%  | 3.91E-08 | 0.00% | CHL4:POL32:C1_06630W_A: CDC54:IRR1: CDC21: CDC46: MCM3: PDS5: C2_08380C_A: C3_04740C_A: CAC1: C4_05790W_A: YBL053: CTF5: SMC6: MMS22: CTF18: ALG5                                                                   |
| 725  | recombinational repair                                   | 24 out of 372 genes, 6.5% | 87 out of 6473 background genes, 1.3%  | 5.73E-08 | 0.00% | CHL4:POL32:C1_06630W_A: CDC54:IRR1:RFA1: CDC21: CDC46:RFA2: MCM3: PDS5: C2_08380C_A: SGS1: RDH54: C3_04740C_A: CAC1: C4_05790W_A: YBL053: CTF5: SMC6: MMS22: CTF18: RAD51: ALG5                                     |

|      |                               |                           |                                        |          |       |                                                                                                                                                                                                            |
|------|-------------------------------|---------------------------|----------------------------------------|----------|-------|------------------------------------------------------------------------------------------------------------------------------------------------------------------------------------------------------------|
| 6310 | DNA recombination             | 31 out of 372 genes, 8.3% | 158 out of 6473 background genes, 2.4% | 1.08E-06 | 0.00% | CHL4:POL32:C1_06630W_A:CDC54:RAD54:IRR1:RFA1:CDC21:CDC46:RFA2:MCM3:PD55:C2_08380C_A:SGS1:RDH54:POL1:C3_04740C_A:CAC1:C4_05790W_A:MSH2:YBL053:C6_00770C_A:CTF5:SMC6:MMS22:CCE1:ATO10:CTF18:RAD51:ALG5:CDC28 |
| 6260 | DNA replication               | 27 out of 372 genes, 7.3% | 124 out of 6473 background genes, 1.9% | 1.23E-06 | 0.00% | DUT1:POL32:C1_06630W_A:CDC6:CDC54:MSH6:RFA1:RNR1:CDC46:RFA2:MCM3:C2_08380C_A:SGS1:POL1:C3_04740C_A:POL30:PRI2:MSH2:YBL053:CAC2:RFC3:C5_05350W_A:RFC2:MMS22:CTF18:RAD51:RFC4                                |
| 6261 | DNA-templated DNA replication | 25 out of 372 genes, 6.7% | 112 out of 6473 background genes, 1.7% | 3.04E-06 | 0.00% | POL32:C1_06630W_A:CDC6:CDC54:MSH6:RFA1:CDC46:RFA2:MCM3:C2_08380C_A:SGS1:POL1:C3_04740C_A:POL30:PRI2:MSH2:YBL053:CAC2:RFC3:C5_05350W_A:RFC2:MMS22:CTF18:RAD51:RFC4                                          |

|      |                        |                            |                                        |          |       |                                                                                                                                                                                                                                                                                                                                                                                                                                                                |
|------|------------------------|----------------------------|----------------------------------------|----------|-------|----------------------------------------------------------------------------------------------------------------------------------------------------------------------------------------------------------------------------------------------------------------------------------------------------------------------------------------------------------------------------------------------------------------------------------------------------------------|
| 8643 | carbohydrate transport | 68 out of 372 genes, 18.3% | 585 out of 6473 background genes, 9.0% | 7.34E-06 | 0.00% | POL93:HGC1:C1_00830W_A:HGT1:GAL1:GAL10:ALG9:CPH1:PLB5:C1_11140W_A:HYR1:C2_02570W_A:DCK1:ITR1:LSP1:PST1:RHO2:C3_00170C_A:ATO1:IRO1:C3_02880W_A:ALT1:CDR11:C3_05990C_A:AHR1:PGA7:OPT6:PDC12:RFX2:ECE1:RBT1:HWP1:AXL2:C4_04250W_A:FAV1:C4_05250W_A:C4_06770W_A:MSH2:GPR1:ECM331:SUT1:MAL31:SAP6:SAP5:C6_04410C_A:FRP2:HGT12:DFI1:C7_01510W_A:DPP3:C7_03500W_A:PCK1:CDA2:BIO3:ADH5:GEF2:IDP2:OPT4:WOR3:MCT1:CFL11:ALS3:CR_07220C_A:YHB5:TUB1:CDG1:YKE2:CR_10610C_A |
| 6281 | DNA repair             | 40 out of 372 genes, 10.8% | 266 out of 6473 background genes, 4.1% | 1.43E-05 | 0.00% | CHL4:POL32:C1_06630W_A:CDC54:MSH6:IRR1:RFA1:ESC4:CDC21:CDC46:RFA2:MC M3:PDS5:C2_08380C_A:SGS1:RDH54:POL1:C3_04740C_A:C3_06400C_A:POL30:CAC1:C4_05790W_A:PRI2:MSH2:C4_07200C_A:EXO1:YBL053:RFC3:C6_00770C_A:CTF5:RFC2:SMC6:MMS22:CTF18:RAD51:ALG5:SMC1:CDC28:CR_10000C_A:RFC4                                                                                                                                                                                   |

|      |                       |                            |                                        |          |       |                                                                                                                                                                                                                                                                                                                                                                                                 |
|------|-----------------------|----------------------------|----------------------------------------|----------|-------|-------------------------------------------------------------------------------------------------------------------------------------------------------------------------------------------------------------------------------------------------------------------------------------------------------------------------------------------------------------------------------------------------|
| 6259 | DNA metabolic process | 51 out of 372 genes, 13.7% | 408 out of 6473 background genes, 6.3% | 7.59E-05 | 0.00% | POL93: CDC13: DUT1: CHL4: POL32: C1_06630W_A: CDC6: CDC54: MSH6: RAD54: IRR1: RFA1: ESC4: RNR1: CDC21: CDC46: RFA2: MCM3: PDS5: C2_08380C_A: SGS1: RDH54: POL1: C3_04740C_A: C3_06400C_A: POL30: CAC1: C4_05790W_A: PRI2: MSH2: C4_07200C_A: EXO1: CTF8: YBL053: CAC2: RFC3: C5_05350W_A: C6_00770C_A: CTF5: RFC2: SMC6: MMS22: CCE1: ATO10: CTF18: RAD51: ALG5: SMC1: CDC28: CR_10000C_A: RFC4 |
| 6974 | DNA damage response   | 42 out of 372 genes, 11.3% | 305 out of 6473 background genes, 4.7% | 8.28E-05 | 0.00% | CHL4: POL32: C1_06630W_A: CDC54: MSH6: IRR1: RFA1: ESC4: CDC21: CDC46: RFA2: MCM3: PDS5: C2_08380C_A: SGS1: RDH54: POL1: C3_04740C_A: C3_06400C_A: POL30: RFX2: CAC1: C4_05790W_A: PRI2: MSH2: C4_07200C_A: EXO1: YBL053: YNK1: RFC3: C6_00770C_A: CTF5: RFC2: SMC6: MMS22: CTF18: RAD51: ALG5: SMC1: CDC28: CR_10000C_A: RFC4                                                                  |

|       |                                   |                            |                                        |         |       |                                                                                                                                                                                                                                                                                                                                                       |
|-------|-----------------------------------|----------------------------|----------------------------------------|---------|-------|-------------------------------------------------------------------------------------------------------------------------------------------------------------------------------------------------------------------------------------------------------------------------------------------------------------------------------------------------------|
| 22402 | cell cycle process                | 55 out of 372 genes, 14.8% | 465 out of 6473 background genes, 7.2% | 0.00014 | 0.00% | TUB2:HGC1:CDC12:CHL4:POL32:C1_06630W_A:C1_10630C_A:GIN4:CDC6:RAX2:CD C54:MSH6:MYO2:IRR1:RFA1:ESC4:CDC46:RFA2:MCM3:PDS5:C2_08380C_A:SGS1:RD H54:POL1:MEA1:C3_04740C_A:POL30:AXL2:MSH2:CDC11:EXO1:CTF8:YBL053:C5_0 3370C_A:CAC2:PGA4:C6_00770C_A:CAN3:CTF5:RFC2:BEM2:SMC6:CDA2:ATO10:CTF 18:RSR1:RAD51:RHO1:SMC1:CDC10:CDC28:CR_06740W_A:TPM2:TUB1:RFC4 |
| 7064  | mitotic sister chromatid cohesion | 12 out of 372 genes, 3.2%  | 34 out of 6473 background genes, 0.5%  | 0.00022 | 0.00% | CHL4:C1_06630W_A:C1_10630C_A:IRR1:PDS5:C3_04740C_A:POL30:CTF8:YBL053:C TF5:CTF18:SMC1                                                                                                                                                                                                                                                                 |
| 7062  | sister chromatid cohesion         | 14 out of 372 genes, 3.8%  | 47 out of 6473 background genes, 0.7%  | 0.00023 | 0.00% | CHL4:C1_06630W_A:C1_10630C_A:IRR1:PDS5:C3_04740C_A:POL30:CTF8:YBL053:C TF5:RFC2:CTF18:SMC1:RFC4                                                                                                                                                                                                                                                       |
| 51276 | chromosome organization           | 34 out of 372 genes, 9.1%  | 233 out of 6473 background genes, 3.6% | 0.0004  | 0.00% | CDC13:TUB2:C1_04490W_A:CHL4:C1_06630W_A:C1_10630C_A:CDC54:MSH6:RAD 54:IRR1:RFA1:CDC46:RFA2:MCM3:PDS5:SGS1:RDH54:C3_04740C_A:POL30:MSH2:E XO1:CTF8:YBL053:CAC2:C6_00770C_A:CTF5:RFC2:CTF18:RAD51:SMC1:CDC28:CR_0 6740W_A:TUB1:RFC4                                                                                                                     |

|       |                            |                            |                                        |         |       |                                                                                                                                                                                                                                                                                                                                                             |
|-------|----------------------------|----------------------------|----------------------------------------|---------|-------|-------------------------------------------------------------------------------------------------------------------------------------------------------------------------------------------------------------------------------------------------------------------------------------------------------------------------------------------------------------|
| 7049  | cell cycle                 | 56 out of 372 genes, 15.1% | 493 out of 6473 background genes, 7.6% | 0.00044 | 0.00% | TUB2:HGC1:CDC12:CHL4:POL32:C1_06630W_A:C1_10630C_A:GIN4:CDC6:RAX2:CD C54:MSH6:RAD54:MYO2:IRR1:RFA1:ESC4:CDC46:RFA2:MCM3:PDS5:C2_08380C_A:S GS1:RDH54:POL1:MEA1:C3_04740C_A:POL30:AXL2:MSH2:CDC11:EXO1:CTF8:YBL05 3:C5_03370C_A:CAC2:PGA4:C6_00770C_A:CAN3:CTF5:RFC2:BEM2:SMC6:CDA2:ATO 10:CTF18:RSR1:RAD51:RHO1:SMC1:CDC10:CDC28:CR_06740W_A:TPM2:TUB1:RFC4 |
| 278   | mitotic cell cycle         | 37 out of 372 genes, 9.9%  | 283 out of 6473 background genes, 4.4% | 0.00193 | 0.00% | TUB2:CDC12:CHL4:C1_06630W_A:GIN4:CDC6:RAX2:CDC54:RAD54:MYO2:RFA1:MC M3:PDS5:C2_08380C_A:SGS1:POL1:MEA1:C3_04740C_A:POL30:AXL2:CDC11:EXO1: C5_03370C_A:CAC2:CAN3:CTF5:RFC2:BEM2:RSR1:RAD51:RHO1:SMC1:CDC10:CDC2 8:CR_06740W_A:TPM2:TUB1                                                                                                                      |
| 33260 | nuclear DNA replication    | 13 out of 372 genes, 3.5%  | 49 out of 6473 background genes, 0.8%  | 0.00279 | 0.00% | POL32:C1_06630W_A:CDC6:CDC54:RFA1:CDC46:MCM3:C2_08380C_A:POL1:C3_04 740C_A:POL30:CAC2:RAD51                                                                                                                                                                                                                                                                 |
| 44786 | cell cycle DNA replication | 13 out of 372 genes, 3.5%  | 49 out of 6473 background genes, 0.8%  | 0.00279 | 0.00% | POL32:C1_06630W_A:CDC6:CDC54:RFA1:CDC46:MCM3:C2_08380C_A:POL1:C3_04 740C_A:POL30:CAC2:RAD51                                                                                                                                                                                                                                                                 |

|       |                            |                           |                                        |         |       |                                                                                                                                                                                                                                                                  |
|-------|----------------------------|---------------------------|----------------------------------------|---------|-------|------------------------------------------------------------------------------------------------------------------------------------------------------------------------------------------------------------------------------------------------------------------|
| 2E+06 | mitotic DNA replication    | 10 out of 372 genes, 2.7% | 29 out of 6473 background genes, 0.4%  | 0.00304 | 0.00% | C1_06630W_A: CDC54: RFA1: MCM3: C2_08380C_A: POL1: C3_04740C_A: POL30: CAC2: RAD51                                                                                                                                                                               |
| 71103 | DNA conformation change    | 10 out of 372 genes, 2.7% | 29 out of 6473 background genes, 0.4%  | 0.00304 | 0.00% | CDC54: RAD54: RFA1: CDC46: RFA2: MCM3: SGS1: RDH54: C3_04740C_A: C6_00770C_A                                                                                                                                                                                     |
| 2E+06 | mitotic cell cycle process | 36 out of 372 genes, 9.7% | 278 out of 6473 background genes, 4.3% | 0.00338 | 0.00% | TUB2: CDC12: CHL4: C1_06630W_A: GIN4: CDC6: RAX2: CDC54: MYO2: RFA1: MCM3: PDS5: C2_08380C_A: SGS1: POL1: MEA1: C3_04740C_A: POL30: AXL2: CDC11: EXO1: C5_03370C_A: CAC2: CAN3: CTF5: RFC2: BEM2: RSR1: RAD51: RHO1: SMC1: CDC10: CDC28: CR_06740W_A: TPM2: TUB1 |
| 30491 | heteroduplex formation     | 5 out of 372 genes, 1.3%  | 6 out of 6473 background genes, 0.1%   | 0.00407 | 0.00% | RAD54: RFA1: RFA2: RDH54: RAD51                                                                                                                                                                                                                                  |
| 42710 | biofilm formation          | 24 out of 372 genes, 6.5% | 155 out of 6473 background genes, 2.4% | 0.00808 | 0.08% | HGC1: ECM33: CPH1: HYR1: YVC1: EAP1: RAS1: CAS4: ERG6: TEC1: AHR1: PGA7: ECE1: HWP1: PHR1: MRV8: SUN41: SAP6: SAP5: ADH5: ATG13: WOR3: ALS3: SUC1                                                                                                                |



|       |                                      |                           |                                        |         |       |                                                                                                                                                                                                                         |
|-------|--------------------------------------|---------------------------|----------------------------------------|---------|-------|-------------------------------------------------------------------------------------------------------------------------------------------------------------------------------------------------------------------------|
| 98630 | aggregation of unicellular organisms | 24 out of 372 genes, 6.5% | 155 out of 6473 background genes, 2.4% | 0.00808 | 0.08% | HGC1:ECM33:CPH1:HYR1:YVC1:EAP1:RAS1:CAS4:ERG6:TEC1:AHR1:PGA7:ECE1:HWP1:PHR1:MRV8:SUN41:SAP6:SAP5:ADH5:ATG13:WOR3:ALS3:SUC1                                                                                              |
| 98743 | cell aggregation                     | 24 out of 372 genes, 6.5% | 155 out of 6473 background genes, 2.4% | 0.00808 | 0.08% | HGC1:ECM33:CPH1:HYR1:YVC1:EAP1:RAS1:CAS4:ERG6:TEC1:AHR1:PGA7:ECE1:HWP1:PHR1:MRV8:SUN41:SAP6:SAP5:ADH5:ATG13:WOR3:ALS3:SUC1                                                                                              |
| 22414 | reproductive process                 | 37 out of 372 genes, 9.9% | 303 out of 6473 background genes, 4.7% | 0.00985 | 0.07% | CDC12:CPH1:CLA4:GIN4:CDC54:MSH6:MYO2:RFA1:RFA2:PDS5:C2_08380C_A:SGS1:RDH54:CAS4:POL1:TEC1:C3_04740C_A:AHR1:POL30:FAV1:MSH2:EXO1:YBL053:PGA4:C6_00770C_A:CTF5:SHE3:CDA2:ATO10:RSR1:RAD51:RHO1:WOR3:CDC10:CDC28:TPM2:TUB1 |

|       |                               |                            |                                          |         |       |                                                                                                                                                                                                                                                                                                                                                                                                                                                                                                                                                                                                           |
|-------|-------------------------------|----------------------------|------------------------------------------|---------|-------|-----------------------------------------------------------------------------------------------------------------------------------------------------------------------------------------------------------------------------------------------------------------------------------------------------------------------------------------------------------------------------------------------------------------------------------------------------------------------------------------------------------------------------------------------------------------------------------------------------------|
| 51716 | cellular response to stimulus | 97 out of 372 genes, 26.1% | 1127 out of 6473 background genes, 17.4% | 0.01193 | 0.07% | HGC1:HGT1:GAL1:GAL10:YPT7:ECM33:CHL4:GPI7:POL32:UME6:C1_06630W_A:RAC1:CPH1:KEX2:CLA4:GIN4:KIP4:CDC6:CDC54:MSH6:MYO2:IRR1:RFA1:SOD5:ESC4:MSB2:FAB1:RNR1:DCK1:FGR51:RHO3:CDC21:CDC46:LTE1:PST1:RFA2:MCM3:PDS5:RHO2:C2_08380C_A:C2_09650W_A:RAS1:FGR6-4:SGS1:RDH54:C3_00170C_A:ARF3:CAS4:POL1:TEC1:C3_04740C_A:RDI1:ADR1:C3_06400C_A:SEC61:RLM1:POL30:RFX2:PGA59:CAC1:PHR1:FGR6-10:C4_05790W_A:PRI2:MSH2:C4_07200C_A:EXO1:GPR1:YBL053:ACH1:YNK1:RFC3:SL2:FET34:C6_00770C_A:SUN41:C6_01460C_A:CTF5:SHE3:HGT12:DFI1:RFC2:BEM2:SMC6:LMO1:MMS22:CTF18:RSR1:RAD51:ALG5:RHO1:SMC1:CDC28:YHB1:CR_10000C_A:RFC4:MAL2 |
| 32392 | DNA geometric change          | 8 out of 372 genes, 2.2%   | 21 out of 6473 background genes, 0.3%    | 0.01352 | 0.07% | CDC54:RAD54:RFA1:CDC46:RFA2:MCM3:SGS1:RDH54                                                                                                                                                                                                                                                                                                                                                                                                                                                                                                                                                               |

|       |                      |                             |                                          |         |       |                                                                                                                                                                                                                                                                                                                                                                                                                                                                                                                                                                                                                                                                             |
|-------|----------------------|-----------------------------|------------------------------------------|---------|-------|-----------------------------------------------------------------------------------------------------------------------------------------------------------------------------------------------------------------------------------------------------------------------------------------------------------------------------------------------------------------------------------------------------------------------------------------------------------------------------------------------------------------------------------------------------------------------------------------------------------------------------------------------------------------------------|
| 50896 | response to stimulus | 106 out of 372 genes, 28.5% | 1272 out of 6473 background genes, 19.7% | 0.01727 | 0.07% | HGC1:HGT1:GAL1:GAL10:YPT7:ECM33:CHL4:GPI7:POL32:UME6:C1_06630W_A:RAC1:CPH1:KEX2:CLA4:GIN4:KIP4:CDC6:CDC54:MSH6:HYR1:MYO2:IRR1:RFA1:SOD5:ESC4:MSB2:FAB1:C2_02570W_A:RNR1:DCK1:FGR51:RHO3:CDC21:CDC46:LSP1:LTE1:PS T1:RFA2:MCM3:PDS5:RHO2:C2_08100W_A:C2_08380C_A:C2_09650W_A:RAS1:FGR6-4:SGS1:RDH54:C3_00170C_A:ARF3:CAS4:CDR11:POL1:TEC1:C3_04740C_A:RDI1:AH R1:C3_06400C_A:SEC61:RLM1:POL30:RFX2:PGA59:CAC1:PHR1:FGR6-10:C4_05790W_A:PRI2:MSH2:C4_07200C_A:EXO1:GPR1:YBL053:ACH1:YNK1:RFC3:S FL2:FET34:C6_00770C_A:SUN41:GPX2:C6_01460C_A:CTF5:SAP6:SHE3:HGT12:DFI1: RFC2:BEM2:SMC6:LMO1:PCK1:MMS22:CTF18:RSR1:RAD51:OPT4:ALG5:RHO1:SMC1 :CDC28:YHB1:CR_10000C_A:RFC4:MAL2 |
|-------|----------------------|-----------------------------|------------------------------------------|---------|-------|-----------------------------------------------------------------------------------------------------------------------------------------------------------------------------------------------------------------------------------------------------------------------------------------------------------------------------------------------------------------------------------------------------------------------------------------------------------------------------------------------------------------------------------------------------------------------------------------------------------------------------------------------------------------------------|

|           |                                                                |                                  |                                                      |         |       |                                                                                                                                                                                                                                                                                                                                                                                                                                                                                                               |
|-----------|----------------------------------------------------------------|----------------------------------|------------------------------------------------------|---------|-------|---------------------------------------------------------------------------------------------------------------------------------------------------------------------------------------------------------------------------------------------------------------------------------------------------------------------------------------------------------------------------------------------------------------------------------------------------------------------------------------------------------------|
| 3355<br>4 | cellular<br>response<br>to stress                              | 76 out of<br>372 genes,<br>20.4% | 833 out of<br>6473<br>backgroun<br>d genes,<br>12.9% | 0.01942 | 0.06% | HGT1:GAL10:ECM33:CHL4:GPI7:POL32:UME6:C1_06630W_A:CPH1:KEX2:CLA4:KIP4:<br>CDC54:MSH6:MYO2:IRR1:RFA1:SOD5:ESC4:MSB2:FAB1:RNR1:DCK1:FGR51:CDC21:C<br>DC46:PST1:RFA2:MCM3:PDS5:C2_08380C_A:RAS1:FGR6-<br>4:SGS1:RDH54:CAS4:POL1:TEC1:C3_04740C_A:RDI1:AHR1:C3_06400C_A:SEC61:RL<br>M1:POL30:RFX2:CAC1:FGR6-<br>10:C4_05790W_A:PRI2:MSH2:C4_07200C_A:EXO1:GPR1:YBL053:YNK1:RFC3:FET34:<br>C6_00770C_A:C6_01460C_A:CTF5:SHE3:HGT12:RFC2:SMC6:MMS22:CTF18:RSR1:RA<br>D51:ALG5:SMC1:CDC28:YHB1:CR_10000C_A:RFC4:MAL2 |
| 7163      | establish<br>ment or<br>maintena<br>nce of<br>cell<br>polarity | 19 out of<br>372 genes,<br>5.1%  | 112 out of<br>6473<br>backgroun<br>d genes,<br>1.7%  | 0.01988 | 0.06% | TUB2:CDC12:CLA4:RAX2:MYO2:MSB2:RHO3:RHO2:RAS1:CAS4:MEA1:AXL2:CDC11:C<br>6_02090C_A:C7_03480W_A:RSR1:RHO1:CR_06740W_A:TUB1                                                                                                                                                                                                                                                                                                                                                                                     |
| 3         | reproduc<br>tion                                               | 41 out of<br>372 genes,<br>11.0% | 364 out of<br>6473<br>backgroun<br>d genes,<br>5.6%  | 0.0232  | 0.06% | CDC12:CPH1:CLA4:GIN4:RAX2:CDC54:MSH6:MYO2:RFA1:RFA2:PDS5:C2_08380C_A:<br>RAS1:SGS1:RDH54:CAS4:POL1:TEC1:C3_04740C_A:AHR1:POL30:AXL2:FAV1:MSH2:C<br>DC11:EXO1:YBL053:PGA4:C6_00770C_A:CTF5:SHE3:CDA2:ATO10:RSR1:RAD51:RHO<br>1:WOR3:CDC10:CDC28:TPM2:TUB1                                                                                                                                                                                                                                                      |

|       |                                                             |                            |                                         |         |       |                                                                                                                                                                                                                                                                                                                                                                                                                                                                                                                |
|-------|-------------------------------------------------------------|----------------------------|-----------------------------------------|---------|-------|----------------------------------------------------------------------------------------------------------------------------------------------------------------------------------------------------------------------------------------------------------------------------------------------------------------------------------------------------------------------------------------------------------------------------------------------------------------------------------------------------------------|
| 6950  | response to stress                                          | 79 out of 372 genes, 21.2% | 882 out of 6473 background genes, 13.6% | 0.02504 | 0.06% | HGT1:GAL10:ECM33:CHL4:GPI7:POL32:UME6:C1_06630W_A:CPH1:KEX2:CLA4:KIP4: CDC54:MSH6:MYO2:IRR1:RFA1:SOD5:ESC4:MSB2:FAB1:RNR1:DCK1:FGR51:CDC21:C DC46:LSP1:PST1:RFA2:MCM3:PDS5:C2_08100W_A:C2_08380C_A:RAS1:FGR6- 4:SGS1:RDH54:CAS4:POL1:TEC1:C3_04740C_A:RDI1:AHR1:C3_06400C_A:SEC61:RL M1:POL30:RFX2:CAC1:FGR6- 10:C4_05790W_A:PRI2:MSH2:C4_07200C_A:EXO1:GPR1:YBL053:YNK1:RFC3:FET34: C6_00770C_A:GPX2:C6_01460C_A:CTF5:SHE3:HGT12:RFC2:SMC6:MMS22:CTF18:RS R1:RAD51:ALG5:SMC1:CDC28:YHB1:CR_10000C_A:RFC4:MAL2 |
| 44182 | filamentous growth of a population of unicellular organisms | 49 out of 372 genes, 13.2% | 470 out of 6473 background genes, 7.3%  | 0.02853 | 0.06% | HGC1:HGT1:GAL10:ECM33:GPI7:UME6:RAC1:CPH1:KEX2:CLA4:GIN4:KIP4:MYO2:ESC 4:MSB2:FAB1:RNR1:DCK1:FGR51:YVC1:RAS1:FGR6- 4:SGS1:CAS4:TEC1:RDI1:AHR1:RFX2:PGA59:PHR1:FGR6- 10:CDC11:GPR1:SFL2:FET34:SUN41:SHE3:HGT12:DFI1:LMO1:CHT1:LAG1:RSR1:RAD5 1:CDC10:ALS3:YHB1:TPM2:MAL2                                                                                                                                                                                                                                        |

|       |                                           |                           |                                       |         |       |                                                                                |
|-------|-------------------------------------------|---------------------------|---------------------------------------|---------|-------|--------------------------------------------------------------------------------|
| 8360  | regulation of cell shape                  | 10 out of 372 genes, 2.7% | 37 out of 6473 background genes, 0.6% | 0.03494 | 0.17% | TUB2:MYO2:RHO3:RAS1:C3_00170C_A:CAS4:C7_03480W_A:RHO1:CR_06740W_A:TUB1         |
| 22616 | DNA strand elongation                     | 9 out of 372 genes, 2.4%  | 30 out of 6473 background genes, 0.5% | 0.03521 | 0.16% | C1_06630W_A:CDC54:MCM3:SGS1:POL30:EXO1:RFC3:RFC2:RFC4                          |
| 32508 | DNA duplex unwinding                      | 7 out of 372 genes, 1.9%  | 18 out of 6473 background genes, 0.3% | 0.04183 | 0.21% | CDC54:RFA1:CDC46:RFA2:MCM3:SGS1:RDH54                                          |
| 7264  | small GTPase mediated signal transduction | 13 out of 372 genes, 3.5% | 62 out of 6473 background genes, 1.0% | 0.04462 | 0.21% | YPT7:RAC1:RHO3:LTE1:RHO2:C2_09650W_A:RAS1:C3_00170C_A:ARF3:RDI1:BEM2:RSR1:RHO1 |

|       |                      |                            |                                        |         |       |                                                                                                                                                                                                                                                                                                                                              |
|-------|----------------------|----------------------------|----------------------------------------|---------|-------|----------------------------------------------------------------------------------------------------------------------------------------------------------------------------------------------------------------------------------------------------------------------------------------------------------------------------------------------|
| 40007 | growth               | 61 out of 372 genes, 16.4% | 641 out of 6473 background genes, 9.9% | 0.04553 | 0.20% | HGC1:HGT1:GAL10:ECM33:CDC12:GPI7:POL32:UME6:RAC1:CPH1:KEX2:CLA4:GIN4:KIP4:RAX2:MYO2:ESC4:MSB2:FAB1:RNR1:DCK1:FGR51:RHO3:YVC1:RAS1:FGR6-4:SGS1:IRO1:CAS4:VAM3:TEC1:RDI1:ADR1:RFX2:PGA59:PHR1:FGR6-10:CDC11:GPR1:YNK1:SFL2:FET34:SUN41:SHE3:HGT12:DFI1:FGR6-1:LMO1:C7_03480W_A:CHT1:LAG1:RSR1:RAD51:RHO1:CDC10:CDC28:CFL11:ALS3:YHB1:TPM2:MAL2 |
| 48285 | organelle fission    | 21 out of 372 genes, 5.6%  | 140 out of 6473 background genes, 2.2% | 0.04975 | 0.20% | TUB2:CHL4:GIN4:RFA1:RFA2:PDS5:SGS1:RDH54:C3_04740C_A:CAC2:C6_00770C_A:CTF5:ATO10:RSR1:RAD51:SMC1:CDC10:CR_05730C_A:CDC28:CR_06740W_A:TUB1                                                                                                                                                                                                    |
| 51647 | nucleus localization | 8 out of 372 genes, 2.2%   | 25 out of 6473 background genes, 0.4%  | 0.05864 | 0.24% | TUB2:MYO2:CDC11:RSR1:CDC10:CR_06740W_A:CR_07220C_A:TUB1                                                                                                                                                                                                                                                                                      |
| 7097  | nuclear migration    | 8 out of 372 genes, 2.2%   | 25 out of 6473 background genes, 0.4%  | 0.05864 | 0.23% | TUB2:MYO2:CDC11:RSR1:CDC10:CR_06740W_A:CR_07220C_A:TUB1                                                                                                                                                                                                                                                                                      |

|       |                                                      |                            |                                        |         |       |                                                                                                                                                                                                                                                                                                                                         |
|-------|------------------------------------------------------|----------------------------|----------------------------------------|---------|-------|-----------------------------------------------------------------------------------------------------------------------------------------------------------------------------------------------------------------------------------------------------------------------------------------------------------------------------------------|
| 30447 | filamentous growth                                   | 60 out of 372 genes, 16.1% | 633 out of 6473 background genes, 9.8% | 0.0599  | 0.23% | HGC1:HGT1:GAL10:ECM33:CDC12:GPI7:POL32:UME6:RAC1:CPH1:KEX2:CLA4:GIN4:KIP4:RAX2:MYO2:ESC4:MSB2:FAB1:RNR1:DCK1:FGR51:RHO3:YVC1:RAS1:FGR6-4:SGS1:IRO1:CAS4:VAM3:TEC1:RDI1:ADR1:RFX2:PGA59:PHR1:FGR6-10:CDC11:GPR1:SFL2:FET34:SUN41:SHE3:HGT12:DFI1:FGR6-1:LMO1:C7_03480W_A:CHT1:LAG1:RSR1:RAD51:RHO1:CDC10:CDC28:CFL11:ALS3:YHB1:TPM2:MAL2 |
| 280   | nuclear division                                     | 20 out of 372 genes, 5.4%  | 132 out of 6473 background genes, 2.0% | 0.0654  | 0.22% | TUB2:CHL4:GIN4:RFA1:RFA2:PDS5:SGS1:RDH54:C3_04740C_A:CAC2:C6_00770C_A:CTF5:ATO10:RSR1:RAD51:SMC1:CDC10:CDC28:CR_06740W_A:TUB1                                                                                                                                                                                                           |
| 51701 | biological process involved in interaction with host | 20 out of 372 genes, 5.4%  | 132 out of 6473 background genes, 2.0% | 0.0654  | 0.22% | ECM33:CPH1:KEX2:HYR1:SOD5:EAP1:RAS1:TEC1:RFX2:ECE1:HWP1:PHR1:GPR1:SUN41:SAP6:SAP5:SHE3:WOR3:CDC10:ALS3                                                                                                                                                                                                                                  |
| 22604 | regulation of cell morphogenesis                     | 10 out of 372 genes, 2.7%  | 40 out of 6473 background genes, 0.6%  | 0.07282 | 0.21% | TUB2:MYO2:RHO3:RAS1:C3_00170C_A:CAS4:C7_03480W_A:RHO1:CR_06740W_A:TUB1                                                                                                                                                                                                                                                                  |



| 44403                                   | biological process involved in symbiotic interaction                      | 21 out of 372 genes, 5.6%  | 144 out of 6473 background genes, 2.2% | 0.07608           | 0.25%                | ECM33:CPH1:KEX2:HYR1:SOD5:EAP1:RAS1:TEC1:AHR1:RFX2:ECE1:HWP1:PHR1:GPR1:SUN41:SAP6:SAP5:SHE3:WOR3:CDC10:ALS3                                                                                         |
|-----------------------------------------|---------------------------------------------------------------------------|----------------------------|----------------------------------------|-------------------|----------------------|-----------------------------------------------------------------------------------------------------------------------------------------------------------------------------------------------------|
| 44419                                   | biological process involved in interspecies interaction between organisms | 38 out of 372 genes, 10.2% | 347 out of 6473 background genes, 5.4% | 0.0883            | 0.29%                | HGC1:ECM33:GPI7:UME6:RBT4:CPH1:KEX2:CLA4:MCD4:HYR1:SOD5:PST1:YVC1:EAP1:RAS1:IRO1:TEC1:AHR1:PGA7:RFX2:ECE1:RBT1:HWP1:PHR1:CDC11:GPR1:SFL2:FET34:SUN41:SAP6:SAP5:SHE3:RSR1:WOR3:CDC10:CFL11:ALS3:YHB1 |
| <b>S120 vs B120 Downregulated genes</b> |                                                                           |                            |                                        |                   |                      |                                                                                                                                                                                                     |
| GOID                                    | GO_term                                                                   | Cluster frequency          | Background frequency                   | Corrected P-value | False discovery rate | Gene(s) annotated to the term                                                                                                                                                                       |

|       |                        |                            |                                        |          |       |                                                                                                                                                                                                                                                                                                                                                                                                                                                                                                                                                                                     |
|-------|------------------------|----------------------------|----------------------------------------|----------|-------|-------------------------------------------------------------------------------------------------------------------------------------------------------------------------------------------------------------------------------------------------------------------------------------------------------------------------------------------------------------------------------------------------------------------------------------------------------------------------------------------------------------------------------------------------------------------------------------|
| 8643  | carbohydrate transport | 83 out of 356 genes, 23.3% | 585 out of 6473 background genes, 9.0% | 6.70E-14 | 0.00% | HMX1:HGC1:C1_00830W_A:TRS20:C1_01620C_A:HOL4:HGT1:CPH1:PLB5:HYR1:KAR9:FTR1:DCK1:FRP3:LSP1:PST1:RHO2:IRF1:DDR48:ATO1:IRO1:UTR2:GFA1:C3_02290W_A:CDR11:RAX1:C3_05990C_A:AHR1:EVP1:FRP1:PGA7:OPT6:RFX2:ECE1:RBT1:HW P1:AXL2:C4_04250W_A:FAV1:CSR1:C4_04980W_A:C4_05080C_A:C4_05250W_A:ARO9:C4_05980C_A:C4_06770W_A:C5_00230C_A:GPR1:C5_01440C_A:ECM331:PUT1:C5_04260W_A:MAL31:SAP6:SAP5:ARG3:C6_03260W_A:SAP4:CSA1:FRP2:C7_00230W_A:DFI1:C7_00630C_A:DPP3:PGA28:C7_03500W_A:ARG1:GEF2:IDP2:WOR3:RBR1:DIT2:CR_05540C_A:MCT1:ALS3:CR_07220C_A:YHB5:PGA13:CHS2:TUB1:YKE2:PLB3:CR_10610C_A |
| 42710 | biofilm formation      | 31 out of 356 genes, 8.7%  | 155 out of 6473 background genes, 2.4% | 1.92E-07 | 0.00% | HGC1:ECM33:CPH1:IPT1:HYR1:CHK1:YVC1:EAP1:RAS1:CAS4:ERG6:AHR1:ZFU2:PGA7:RBT5:ECE1:HWP1:PHR1:CSR1:CLN3:CCN1:SUN41:SAP6:SAP5:CSA1:ATG13:WOR3:BCR1:ALS3:SUC1:DEF1                                                                                                                                                                                                                                                                                                                                                                                                                       |

|       |                                               |                           |                                        |          |       |                                                                                                                                                                   |
|-------|-----------------------------------------------|---------------------------|----------------------------------------|----------|-------|-------------------------------------------------------------------------------------------------------------------------------------------------------------------|
| 98630 | aggregation of unicellular organisms          | 31 out of 356 genes, 8.7% | 155 out of 6473 background genes, 2.4% | 1.92E-07 | 0.00% | HGC1:ECM33:CPH1:IPT1:HYR1:CHK1:YVC1:EAP1:RAS1:CAS4:ERG6:AHR1:ZFU2:PGA7:RBT5:ECE1:HWP1:PHR1:CSR1:CLN3:CCN1:SUN41:SAP6:SAP5:CSA1:ATG13:WOR3:BCR1:ALS3:SUC1:DEF1     |
| 98743 | cell aggregation                              | 31 out of 356 genes, 8.7% | 155 out of 6473 background genes, 2.4% | 1.92E-07 | 0.00% | HGC1:ECM33:CPH1:IPT1:HYR1:CHK1:YVC1:EAP1:RAS1:CAS4:ERG6:AHR1:ZFU2:PGA7:RBT5:ECE1:HWP1:PHR1:CSR1:CLN3:CCN1:SUN41:SAP6:SAP5:CSA1:ATG13:WOR3:BCR1:ALS3:SUC1:DEF1     |
| 7163  | establishment or maintenance of cell polarity | 25 out of 356 genes, 7.0% | 112 out of 6473 background genes, 1.7% | 1.07E-06 | 0.00% | TUB2:CDC12:MSB1:CLA4:RAX2:MYO2:MSB2:RHO3:RHO2:RAS1:CAS4:RAX1:MEA1:AXL2:CDC11:CCN1:INT1:C5_03170C_A:C6_02090C_A:C7_03480W_A:RSR1:RHO1:CR_06740W_A:TUB1:CR_09520C_A |
| 44010 | single-species biofilm formation              | 28 out of 356 genes, 7.9% | 138 out of 6473 background genes, 2.1% | 1.07E-06 | 0.00% | HGC1:ECM33:CPH1:IPT1:HYR1:CHK1:EAP1:RAS1:CAS4:AHR1:ZFU2:PGA7:RBT5:ECE1:HWP1:PHR1:CSR1:CLN3:CCN1:SUN41:SAP6:SAP5:CSA1:ATG13:BCR1:ALS3:SUC1:DEF1                    |

|       |                                                                           |                            |                                        |          |       |                                                                                                                                                                                                                                                      |
|-------|---------------------------------------------------------------------------|----------------------------|----------------------------------------|----------|-------|------------------------------------------------------------------------------------------------------------------------------------------------------------------------------------------------------------------------------------------------------|
| 44419 | biological process involved in interspecies interaction between organisms | 48 out of 356 genes, 13.5% | 347 out of 6473 background genes, 5.4% | 1.50E-06 | 0.00% | HGC1:ECM33:MSB1:UME6:RBT4:CPH1:IPT1:CLA4:MCD4:CHS3:HYR1:FTR1:SOD5:CTF1:CHK1:PST1:YVC1:PHM7:EAP1:RAS1:IRO1:UTR2:YCK2:AHR1:PGA7:RFX2:SOD1:ECE1:RBT1:HWP1:PHR1:CDC11:GPR1:INT1:FET34:SUN41:SAP6:SAP5:SHE3:SAP4:CHS1:RSR1:WOR3:CDC10:BCR1:ALS3:YHB1:DEF1 |
| 51647 | nucleus localization                                                      | 12 out of 356 genes, 3.4%  | 25 out of 6473 background genes, 0.4%  | 1.79E-06 | 0.00% | TUB2:C1_11250W_A:KAR9:MYO2:KIP2:CDC11:MYO1:RSR1:CDC10:CR_06740W_A:CR_07220C_A:TUB1                                                                                                                                                                   |
| 7097  | nuclear migration                                                         | 12 out of 356 genes, 3.4%  | 25 out of 6473 background genes, 0.4%  | 1.79E-06 | 0.00% | TUB2:C1_11250W_A:KAR9:MYO2:KIP2:CDC11:MYO1:RSR1:CDC10:CR_06740W_A:CR_07220C_A:TUB1                                                                                                                                                                   |
| 51301 | cell division                                                             | 27 out of 356 genes, 7.6%  | 134 out of 6473 background genes, 2.1% | 2.55E-06 | 0.00% | TEM1:CDC12:MSB1:CDC3:GIN4:RAX2:MYO2:CAS4:RAX1:MEA1:AXL2:CDC11:CLN3:MYO1:INT1:C5_03170C_A:FET34:SUN41:CTF5:IQG1:CHS1:RSR1:CR_02210W_A:RHO1:CDC10:TPM2:CHS2                                                                                            |
| 910   | cytokinesis                                                               | 21 out of 356 genes, 5.9%  | 87 out of 6473 background genes, 1.3%  | 5.44E-06 | 0.00% | TEM1:CDC12:CDC3:GIN4:RAX2:MYO2:RAX1:MEA1:AXL2:CDC11:MYO1:INT1:C5_03170C_A:IQG1:CHS1:RSR1:CR_02210W_A:RHO1:CDC10:TPM2:CHS2                                                                                                                            |

|       |                                                      |                            |                                        |          |       |                                                                                                                                                                                                                                                                          |
|-------|------------------------------------------------------|----------------------------|----------------------------------------|----------|-------|--------------------------------------------------------------------------------------------------------------------------------------------------------------------------------------------------------------------------------------------------------------------------|
| 19954 | asexual reproduction                                 | 21 out of 356 genes, 5.9%  | 95 out of 6473 background genes, 1.5%  | 2.92E-05 | 0.00% | CLA4:GIN4:RAX2:CHS3:MYO2:RAS1:CAS4:RAX1:AXL2:CDC11:CLN3:INT1:C5_03170C_A:ARG3:CHS1:RSR1:CR_02210W_A:RHO1:CDC10:DIT2:CHS2                                                                                                                                                 |
| 51701 | biological process involved in interaction with host | 25 out of 356 genes, 7.0%  | 132 out of 6473 background genes, 2.0% | 3.78E-05 | 0.00% | ECM33:MSB1:CPH1:HYR1:FTR1:SOD5:EAP1:RAS1:UTR2:YCK2:RFX2:ECE1:HWP1:PHR1:GPR1:INT1:SUN41:SAP6:SAP5:SHE3:SAP4:WOR3:CDC10:BCR1:ALS3                                                                                                                                          |
| 2E+06 | organelle disassembly                                | 37 out of 356 genes, 10.4% | 256 out of 6473 background genes, 4.0% | 4.23E-05 | 0.00% | TUB2:CDC3:SFH5:KAR9:C2_01340W_A:SRD1:DCK1:SPO7:LSP1:NGT1:IRO1:RAX1:C3_05990C_A:ZFU2:CSP2:C4_01220C_A:OPT6:ZCF27:RFX2:C4_03460C_A:FAV1:C4_04980W_A:C4_05080C_A:GPR1:C5_01440C_A:ZCF20:PUT1:GPX2:C6_01620W_A:LMO1:SNG3:CR_01280C_A:ATG13:CR_05540C_A:BCR1:CR_07220C_A:YKE2 |
| 44403 | biological process involved in symbiotic interaction | 26 out of 356 genes, 7.3%  | 144 out of 6473 background genes, 2.2% | 5.57E-05 | 0.00% | ECM33:MSB1:CPH1:HYR1:FTR1:SOD5:EAP1:RAS1:UTR2:YCK2:HR1:RFX2:ECE1:HWP1:PHR1:GPR1:INT1:SUN41:SAP6:SAP5:SHE3:SAP4:WOR3:CDC10:BCR1:ALS3                                                                                                                                      |

|       |                                                         |                            |                                        |         |       |                                                                                                                                                                                                                                                                                                                                                                                      |
|-------|---------------------------------------------------------|----------------------------|----------------------------------------|---------|-------|--------------------------------------------------------------------------------------------------------------------------------------------------------------------------------------------------------------------------------------------------------------------------------------------------------------------------------------------------------------------------------------|
| 44011 | single-species biofilm formation on inanimate substrate | 23 out of 356 genes, 6.5%  | 120 out of 6473 background genes, 1.9% | 0.0001  | 0.00% | HGC1:ECM33:CPH1:IPT1:HYR1:CHK1:EAP1:RAS1:CAS4:ZFU2:PGA7:RBT5:ECE1:HWP1:PHR1:CSR1:SUN41:SAP6:CSA1:BCR1:ALS3:SUC1:DEF1                                                                                                                                                                                                                                                                 |
| 281   | mitotic cytokinesis                                     | 17 out of 356 genes, 4.8%  | 69 out of 6473 background genes, 1.1%  | 0.00011 | 0.00% | CDC12:CDC3:RAX2:MYO2:RAX1:MEA1:AXL2:CDC11:MYO1:INT1:C5_03170C_A:IQG1:CHS1:RSR1:RHO1:CDC10:TPM2                                                                                                                                                                                                                                                                                       |
| 30447 | filamentous growth                                      | 66 out of 356 genes, 18.5% | 633 out of 6473 background genes, 9.8% | 0.00014 | 0.00% | HGC1:HGT1:ECM33:CDC12:CDC3:C1_05980W_A:UME6:C1_07220W_A:CPH1:FGR6-3:IPT1:CLA4:GIN4:KIP4:RAX2:CHS3:MYO2:MSB2:CHK1:DCK1:RHO3:YVC1:DDR48:SSO2:RAS1:IRO1:CAS4:UTR2:GFA1:C3_02290W_A:VAM3:RDI1:YCK2:AHR1:ZFU2:ZCF27:RFX2:SOD1:PHR1:CSR1:FGR6-10:CDC11:CLN3:GPR1:CCN1:INT1:FET34:SUN41:STE23:SHE3:DFI1:CHS1:LMO1:C7_03480W_A:LAG1:RSR1:RHO1:RBR1:CDC10:BCR1:ALS3:YHB1:TPM2:PGA13:CHS2:DEF1 |

|       |                                            |                           |                                        |         |       |                                                                                                                                                                                                                                                                                             |
|-------|--------------------------------------------|---------------------------|----------------------------------------|---------|-------|---------------------------------------------------------------------------------------------------------------------------------------------------------------------------------------------------------------------------------------------------------------------------------------------|
| 61640 | cytoskeleton-dependent cytokinesis         | 17 out of 356 genes, 4.8% | 70 out of 6473 background genes, 1.1%  | 0.00014 | 0.00% | CDC12: CDC3: RAX2: MYO2: RAX1: MEA1: AXL2: CDC11: MYO1: INT1: C5_03170C_A: IQG1: CHS1: RSR1: RHO1: CDC10: TPM2                                                                                                                                                                              |
| 90609 | single-species submerged biofilm formation | 24 out of 356 genes, 6.7% | 132 out of 6473 background genes, 2.0% | 0.00016 | 0.00% | HGC1: ECM33: CPH1: IPT1: HYR1: CHK1: EAP1: RAS1: CAS4: AHR1: ZFU2: PGA7: RBT5: ECE1: HWP1: PHR1: CSR1: SUN41: SAP6: CSA1: BCR1: ALS3: SUC1: DEF1                                                                                                                                            |
| 422   | autophagy of mitochondrion                 | 34 out of 356 genes, 9.6% | 236 out of 6473 background genes, 3.6% | 0.00016 | 0.00% | SFH5: KAR9: C2_01340W_A: SRD1: DCK1: LSP1: NGT1: IRO1: RAX1: C3_05990C_A: ZFU2: C SP2: C4_01220C_A: OPT6: ZCF27: RFX2: C4_03460C_A: FAV1: C4_04980W_A: C4_05080C_A: GPR1: C5_01440C_A: ZCF20: PUT1: GPX2: C6_01620W_A: LMO1: SNG3: CR_01280C_A: ATG13: CR_05540C_A: BCR1: CR_07220C_A: YKE2 |
| 61726 | mitochondrion disassembly                  | 34 out of 356 genes, 9.6% | 236 out of 6473 background genes, 3.6% | 0.00016 | 0.00% | SFH5: KAR9: C2_01340W_A: SRD1: DCK1: LSP1: NGT1: IRO1: RAX1: C3_05990C_A: ZFU2: C SP2: C4_01220C_A: OPT6: ZCF27: RFX2: C4_03460C_A: FAV1: C4_04980W_A: C4_05080C_A: GPR1: C5_01440C_A: ZCF20: PUT1: GPX2: C6_01620W_A: LMO1: SNG3: CR_01280C_A: ATG13: CR_05540C_A: BCR1: CR_07220C_A: YKE2 |

|       |                             |                            |                                        |         |       |                                                                                                                                                                                                                                                                                                                                                                                      |
|-------|-----------------------------|----------------------------|----------------------------------------|---------|-------|--------------------------------------------------------------------------------------------------------------------------------------------------------------------------------------------------------------------------------------------------------------------------------------------------------------------------------------------------------------------------------------|
| 40007 | growth                      | 66 out of 356 genes, 18.5% | 641 out of 6473 background genes, 9.9% | 0.00022 | 0.00% | HGC1:HGT1:ECM33:CDC12:CDC3:C1_05980W_A:UME6:C1_07220W_A:CPH1:FGR6-3:IPT1:CLA4:GIN4:KIP4:RAX2:CHS3:MYO2:MSB2:CHK1:DCK1:RHO3:YVC1:DDR48:SSO2:RAS1:IRO1:CAS4:UTR2:GFA1:C3_02290W_A:VAM3:RDI1:YCK2:ADR1:ZFU2:ZCF27:RFX2:SOD1:PHR1:CSR1:FGR6-10:CDC11:CLN3:GPR1:CCN1:INT1:FET34:SUN41:STE23:SHE3:DFI1:CHS1:LMO1:C7_03480W_A:LAG1:RSR1:RHO1:RBR1:CDC10:BCR1:ALS3:YHB1:TPM2:PGA13:CHS2:DEF1 |
| 90605 | submerged biofilm formation | 24 out of 356 genes, 6.7%  | 135 out of 6473 background genes, 2.1% | 0.00024 | 0.00% | HGC1:ECM33:CPH1:IPT1:HYR1:CHK1:EAP1:RAS1:CAS4:ADR1:ZFU2:PGA7:RBT5:ECE1:HWP1:PHR1:CSR1:SUN41:SAP6:CSA1:BCR1:ALS3:SUC1:DEF1                                                                                                                                                                                                                                                            |
| 99111 | microtubule-based transport | 9 out of 356 genes, 2.5%   | 20 out of 6473 background genes, 0.3%  | 0.00042 | 0.00% | TUB2:C1_11250W_A:KAR9:KIP2:MYO1:CR_06740W_A:CR_07220C_A:TUB1:CR_09520C_A                                                                                                                                                                                                                                                                                                             |
| 7018  | microtubule-based movement  | 10 out of 356 genes, 2.8%  | 26 out of 6473 background genes, 0.4%  | 0.00055 | 0.00% | TUB2:C1_11250W_A:KIP4:KAR9:KIP2:MYO1:CR_06740W_A:CR_07220C_A:TUB1:CR_09520C_A                                                                                                                                                                                                                                                                                                        |



|       |                                                |                            |                                        |         |       |                                                                                                                                                                                                                                                                                           |
|-------|------------------------------------------------|----------------------------|----------------------------------------|---------|-------|-------------------------------------------------------------------------------------------------------------------------------------------------------------------------------------------------------------------------------------------------------------------------------------------|
| 44406 | adhesion of symbiont to host                   | 16 out of 356 genes, 4.5%  | 69 out of 6473 background genes, 1.1%  | 0.00068 | 0.00% | ECM33:MSB1:HYR1:EAP1:UTR2:RFX2:HWP1:PHR1:SUN41:SAP6:SAP5:SAP4:WOR3:CD10:BCR1:ALS3                                                                                                                                                                                                         |
| 33212 | iron import into cell                          | 6 out of 356 genes, 1.7%   | 8 out of 6473 background genes, 0.1%   | 0.0007  | 0.00% | FTR1:FRP1:ZCF20:FET34:FRP2:ALS3                                                                                                                                                                                                                                                           |
| 30705 | cytoskeleton-dependent intracellular transport | 9 out of 356 genes, 2.5%   | 21 out of 6473 background genes, 0.3%  | 0.0007  | 0.00% | TUB2:C1_11250W_A:KAR9:MYO2:KIP2:MYO1:CR_07220C_A:TUB1:CR_09520C_A                                                                                                                                                                                                                         |
| 22411 | cellular component disassembly                 | 39 out of 356 genes, 11.0% | 310 out of 6473 background genes, 4.8% | 0.00076 | 0.00% | TUB2:CDC3:SFH5:C1_11250W_A:KAR9:C2_01340W_A:SRD1:DCK1:SPO7:LSP1:NGT1:IRO1:VAM3:RAX1:C3_05990C_A:ZFU2:CSP2:C4_01220C_A:OPT6:ZCF27:RFX2:C4_03460C_A:FAV1:C4_04980W_A:C4_05080C_A:GPR1:C5_01440C_A:ZCF20:PUT1:GPX2:C6_01620W_A:LMO1:SNG3:CR_01280C_A:ATG13:CR_05540C_A:BCR1:CR_07220C_A:YKE2 |

|       |                                |                           |                                        |         |       |                                                                                                                                                                      |
|-------|--------------------------------|---------------------------|----------------------------------------|---------|-------|----------------------------------------------------------------------------------------------------------------------------------------------------------------------|
| 7010  | cytoskeleton organization      | 28 out of 356 genes, 7.9% | 188 out of 6473 background genes, 2.9% | 0.00111 | 0.00% | TUB2:TEM1:CDC12:CDC3:HCM1:CLA4:C1_11250W_A:GIN4:KAR9:MYO2:RHO3:BUD14:RHO2:KIP2:RDI1:CDC11:MYO1:INT1:BEM2:IQG1:CHS1:RSR1:RHO1:CDC10:CR_06740W_A:TPM2:TUB1:CR_09520C_A |
| 6879  | intracellular iron homeostasis | 13 out of 356 genes, 3.7% | 50 out of 6473 background genes, 0.8%  | 0.00193 | 0.00% | HMX1:FTR1:PHO13:IRO1:FRP1:RBT5:C4_04760C_A:ZCF20:CCC2:FET34:CSA1:FRP2:ALS3                                                                                           |
| 30448 | hyphal growth                  | 19 out of 356 genes, 5.3% | 103 out of 6473 background genes, 1.6% | 0.00259 | 0.00% | CDC12:CDC3:RAX2:CHS3:MYO2:RHO3:SSO2:GFA1:VAM3:RDI1:YCK2:CDC11:CLN3:CCN1:CHS1:RSR1:RHO1:CDC10:CHS2                                                                    |
| 8360  | regulation of cell shape       | 11 out of 356 genes, 3.1% | 37 out of 6473 background genes, 0.6%  | 0.00289 | 0.00% | TUB2:MYO2:RHO3:BUD14:RAS1:CAS4:C7_03480W_A:RHO1:CR_06740W_A:TUB1:CR_09520C_A                                                                                         |

|       |                                                             |                            |                                        |         |       |                                                                                                                                                                                                                                                                                       |
|-------|-------------------------------------------------------------|----------------------------|----------------------------------------|---------|-------|---------------------------------------------------------------------------------------------------------------------------------------------------------------------------------------------------------------------------------------------------------------------------------------|
| 44182 | filamentous growth of a population of unicellular organisms | 50 out of 356 genes, 14.0% | 470 out of 6473 background genes, 7.3% | 0.00335 | 0.00% | HGC1:HGT1:ECM33:C1_05980W_A:UME6:CPH1:FGR6-3:IPT1:CLA4:GIN4:KIP4:MYO2:MSB2:CHK1:DCK1:YVC1:DDR48:RAS1:CAS4:UTR2:C3_02290W_A:RDI1:ADR1:ZFU2:ZCF27:RFX2:SOD1:PHR1:CSR1:FGR6-10:CDL11:CLN3:GPR1:CCN1:INT1:FET34:SUN41:STE23:SHE3:DFI1:LMO1:LAG1:RSR1:RBR1:CDL10:ALS3:YHB1:TPM2:PGA13:DEF1 |
| 98771 | inorganic ion homeostasis                                   | 19 out of 356 genes, 5.3%  | 105 out of 6473 background genes, 1.6% | 0.0035  | 0.00% | HMX1:CTR2:FTR1:YVC1:PHO13:IRO1:FRP1:RBT5:SOD1:C4_04760C_A:CSR1:C4_06770W_A:ZCF20:CCC2:FET34:CSA1:FRP2:GEF2:ALS3                                                                                                                                                                       |
| 10970 | transport along microtubule                                 | 8 out of 356 genes, 2.2%   | 19 out of 6473 background genes, 0.3%  | 0.00354 | 0.00% | TUB2:C1_11250W_A:KAR9:KIP2:MYO1:CR_07220C_A:TUB1:CR_09520C_A                                                                                                                                                                                                                          |
| 31109 | microtubule polymerization or depolymerization              | 6 out of 356 genes, 1.7%   | 10 out of 6473 background genes, 0.2%  | 0.00477 | 0.00% | TUB2:C1_11250W_A:KIP2:CR_06740W_A:TUB1:CR_09520C_A                                                                                                                                                                                                                                    |

|       |                             |                             |                                          |         |       |                                                                                                                                                                                                                                                                                                                                                                                                                                                                                                                                                                                                                                                                                                                                                                                                                                 |
|-------|-----------------------------|-----------------------------|------------------------------------------|---------|-------|---------------------------------------------------------------------------------------------------------------------------------------------------------------------------------------------------------------------------------------------------------------------------------------------------------------------------------------------------------------------------------------------------------------------------------------------------------------------------------------------------------------------------------------------------------------------------------------------------------------------------------------------------------------------------------------------------------------------------------------------------------------------------------------------------------------------------------|
| 71702 | organic substance transport | 116 out of 356 genes, 32.6% | 1458 out of 6473 background genes, 22.5% | 0.00479 | 0.00% | HMX1:HGC1:C1_00830W_A:TRS20:C1_01620C_A:HOL4:HGT1:YPT7:TEM1:C1_05980W_A:CPH1:PLB5:CLA4:SFH5:MCD4:HYR1:KAR9:MYO2:FTR1:SOD5:C2_01340W_A:CHK1:DCK1:RHO3:FRP3:LSP1:PST1:C2_07220W_A:YVC1:RHO2:IRF1:DDR48:YEA4:SSO2:NGT1:ATO1:IRO1:ARF3:UTR2:GFA1:C3_02290W_A:CDR11:VAM3:RAX1:CDR1:C3_05990C_A:AHR1:EVP1:FRP1:PGA7:RBT5:SPC2:C4_01220C_A:OPT6:RFX2:ECE1:RBT1:HWP1:AXL2:C4_04250W_A:FAV1:CSR1:C4_04980W_A:C4_05080C_A:C4_05250W_A:ARO9:C4_05980C_A:C4_06770W_A:C5_00230C_A:GPR1:C5_01440C_A:ZCF20:ECM331:PUT1:C5_04260W_A:MAL31:C6_01620W_A:PTK2:C6_02160W_A:SAP6:SAP5:ARG3:C6_03260W_A:SAP4:CSA1:FRP2:C7_00230W_A:DFI1:C7_00630C_A:DPP3:PGA28:C7_03500W_A:ARG1:CR_01280C_A:GEF2:IDP2:RHO1:ATG13:WOR3:RBR1:DIT2:CR_05540C_A:MCT1:CR_06790C_A:ALS3:CR_07220C_A:YHB5:PGA13:CHS2:TUB1:SUC1:CR_09520C_A:CR_09570W_A:YKE2:PLB3:CR_10610C_A |
|-------|-----------------------------|-----------------------------|------------------------------------------|---------|-------|---------------------------------------------------------------------------------------------------------------------------------------------------------------------------------------------------------------------------------------------------------------------------------------------------------------------------------------------------------------------------------------------------------------------------------------------------------------------------------------------------------------------------------------------------------------------------------------------------------------------------------------------------------------------------------------------------------------------------------------------------------------------------------------------------------------------------------|

|       |                                    |                           |                                        |         |       |                                                                                                                                               |
|-------|------------------------------------|---------------------------|----------------------------------------|---------|-------|-----------------------------------------------------------------------------------------------------------------------------------------------|
| 22604 | regulation of cell morphogenesis   | 11 out of 356 genes, 3.1% | 40 out of 6473 background genes, 0.6%  | 0.00673 | 0.00% | TUB2:MYO2:RHO3:BUD14:RAS1:CAS4:C7_03480W_A:RHO1:CR_06740W_A:TUB1:CR_09520C_A                                                                  |
| 31106 | septin ring organization           | 9 out of 356 genes, 2.5%  | 27 out of 6473 background genes, 0.4%  | 0.00833 | 0.00% | CDC12:CDC3:CLA4:GIN4:CDC11:INT1:RSR1:RHO1:CDC10                                                                                               |
| 55082 | intracellular chemical homeostasis | 25 out of 356 genes, 7.0% | 176 out of 6473 background genes, 2.7% | 0.01012 | 0.00% | HMX1:CTR2:FTR1:FRP3:YVC1:PHO13:RAS1:IRO1:CDR1:YCK2:FRP1:RBT5:SOD1:C4_04760C_A:CSR1:C4_06770W_A:GPR1:ZCF20:CCC2:FET34:PTK2:CSA1:FRP2:GEF2:ALS3 |
| 32185 | septin cytoskeleton organization   | 9 out of 356 genes, 2.5%  | 29 out of 6473 background genes, 0.4%  | 0.01614 | 0.00% | CDC12:CDC3:CLA4:GIN4:CDC11:INT1:RSR1:RHO1:CDC10                                                                                               |

|       |                                                         |                           |                                        |         |       |                                                                                                                           |
|-------|---------------------------------------------------------|---------------------------|----------------------------------------|---------|-------|---------------------------------------------------------------------------------------------------------------------------|
| 6873  | intracellular monoatomic ion homeostasis                | 21 out of 356 genes, 5.9% | 137 out of 6473 background genes, 2.1% | 0.0163  | 0.00% | HMX1:CTR2:FTR1:YVC1:PHO13:IRO1:CDR1:FRP1:RBT5:SOD1:C4_04760C_A:CSR1:C4_06770W_A:ZCF20:CCC2:FET34:PTK2:CSA1:FRP2:GEF2:ALS3 |
| 44407 | single-species biofilm formation in or on host organism | 6 out of 356 genes, 1.7%  | 12 out of 6473 background genes, 0.2%  | 0.01911 | 0.00% | HYR1:EAP1:HWP1:PHR1:SUN41:BCR1                                                                                            |

|       |              |                             |                                          |        |       |                                                                                                                                                                                                                                                                                                                                                                                                                                                                                                                                                                                                                                                                                                                                                                                                                                                                                                                                                                                                                                                                                                                  |
|-------|--------------|-----------------------------|------------------------------------------|--------|-------|------------------------------------------------------------------------------------------------------------------------------------------------------------------------------------------------------------------------------------------------------------------------------------------------------------------------------------------------------------------------------------------------------------------------------------------------------------------------------------------------------------------------------------------------------------------------------------------------------------------------------------------------------------------------------------------------------------------------------------------------------------------------------------------------------------------------------------------------------------------------------------------------------------------------------------------------------------------------------------------------------------------------------------------------------------------------------------------------------------------|
| 51179 | localization | 157 out of 356 genes, 44.1% | 2189 out of 6473 background genes, 33.8% | 0.0224 | 0.00% | <p> HMX1:TUB2:HGC1:C1_00830W_A:TRS20:C1_01620C_A:HOL4:HGT1:EXG2:YPT7:TEM1:C1_05980W_A:CPH1:PLB5:CTR2:IPT1:CLA4:SFH5:C1_11250W_A:KIP4:MCD4:FEN1:CHS3:HYR1:KAR9:MYO2:FTR1:SOD5:C2_01340W_A:SRD1:CHK1:DCK1:RHO3:FRP3:LSP1:LTE1:PST1:C2_07220W_A:YVC1:RHO2:C2_08100W_A:IRF1:DDR48:EAP1:YEA4:SSO2:RAS1:KIP2:NGT1:ATO1:IRO1:ARF3:UTR2:C3_01940C_A:GFA1:C3_02290W_A:CDR11:VAM3:C3_04350C_A:RAX1:MEA1:CDR1:YCK2:C3_05990C_A:AHR1:EVP1:FRP1:PGA7:RBT5:SPC2:C4_01220C_A:OPT6:RFX2:ECE1:RBT1:HWP1:AXL2:C4_04250W_A:FAV1:CSR1:C4_04980W_A:C4_05080C_A:C4_05250W_A:ARO9:C4_05980C_A:C4_06770W_A:CDC11:C5_00230C_A:GIT2:AUR1:GPR1:C5_01440C_A:ZCF20:MYO1:ECM331:INT1:PUT1:CCC2:C5_03170C_A:C5_03930C_A:C5_04260W_A:MAL31:FET34:CAN3:C6_01620W_A:PTK2:CTF5:C6_02160W_A:SAP6:SAP5:SHE3:ARG3:C6_03260W_A:SAP4:CSA1:FRP2:C7_00230W_A:DFI1:C7_00630C_A:IQG1:DPP3:PGA28:SNG3:C7_03480W_A:C7_03500W_A:ARG1:CR_01280C_A:RSR1:GEF2:IDP2:RHO1:ATG13:WOR3:RBR1:CDC10:DIT2:CR_05540C_A:MCT1:BCR1:SEO1:CR_06740W_A:CR_06790C_A:ALS3:CR_07220C_A:YHB1:YHB5:TPM2:PGA13:CHS2:TUB1:SUC1:CR_09520C_A:CR_09570W_A:YKE2:PLB3:PTP3:CR_10610C_A </p> |
|-------|--------------|-----------------------------|------------------------------------------|--------|-------|------------------------------------------------------------------------------------------------------------------------------------------------------------------------------------------------------------------------------------------------------------------------------------------------------------------------------------------------------------------------------------------------------------------------------------------------------------------------------------------------------------------------------------------------------------------------------------------------------------------------------------------------------------------------------------------------------------------------------------------------------------------------------------------------------------------------------------------------------------------------------------------------------------------------------------------------------------------------------------------------------------------------------------------------------------------------------------------------------------------|

|       |                                                  |                           |                                        |         |       |                                                                                                                                                                                   |
|-------|--------------------------------------------------|---------------------------|----------------------------------------|---------|-------|-----------------------------------------------------------------------------------------------------------------------------------------------------------------------------------|
| 22603 | regulation of anatomical structure morphogenesis | 11 out of 356 genes, 3.1% | 45 out of 6473 background genes, 0.7%  | 0.02306 | 0.00% | TUB2:MYO2:RHO3:BUD14:RAS1:CAS4:C7_03480W_A:RHO1:CR_06740W_A:TUB1:CR_09520C_A                                                                                                      |
| 30003 | intracellular monoatomic cation homeostasis      | 20 out of 356 genes, 5.6% | 130 out of 6473 background genes, 2.0% | 0.02462 | 0.00% | HMX1:CTR2:FTR1:YVC1:PHO13:IRO1:CDR1:FRP1:RBT5:SOD1:C4_04760C_A:CSR1:C4_06770W_A:ZCF20:CCC2:FET34:CSA1:FRP2:GEF2:ALS3                                                              |
| 10570 | regulation of filamentous growth                 | 30 out of 356 genes, 8.4% | 244 out of 6473 background genes, 3.8% | 0.02465 | 0.00% | HGC1:MSB1:C1_05980W_A:UME6:CPH1:IPT1:CLA4:GIN4:CDC6:MYO2:MSB2:CHK1:C2_05580W_A:IRF1:RAS1:C3_01800C_A:YCK2:AHR1:ZFU2:ZCF27:RFX2:CLN3:GPR1:CN1:RSR1:CR_02210W_A:BCR1:CLG1:DEF1:PTP3 |



|       |                                       |                           |                                        |         |       |                                                                                                                                                                                               |
|-------|---------------------------------------|---------------------------|----------------------------------------|---------|-------|-----------------------------------------------------------------------------------------------------------------------------------------------------------------------------------------------|
| 30473 | nuclear migration along microtubule   | 7 out of 356 genes, 2.0%  | 18 out of 6473 background genes, 0.3%  | 0.02786 | 0.00% | TUB2:C1_11250W_A:KAR9:KIP2:MYO1:CR_07220C_A:TUB1                                                                                                                                              |
| 72384 | organelle transport along microtubule | 7 out of 356 genes, 2.0%  | 18 out of 6473 background genes, 0.3%  | 0.02786 | 0.00% | TUB2:C1_11250W_A:KAR9:KIP2:MYO1:CR_07220C_A:TUB1                                                                                                                                              |
| 40008 | regulation of growth                  | 31 out of 356 genes, 8.7% | 258 out of 6473 background genes, 4.0% | 0.02843 | 0.00% | HGC1:MSB1:C1_05980W_A:UME6:CPH1:IPT1:CLA4:GIN4:CDC6:MYO2:MSB2:CHK1:C2_05580W_A:IRF1:RAS1:C3_01800C_A:YCK2:AGR1:ZFU2:ZCF27:RFX2:CLN3:GPR1:CN1:C7_03480W_A:RSR1:CR_02210W_A:BCR1:CLG1:DEF1:PTP3 |
| 50801 | monocation homeostasis                | 21 out of 356 genes, 5.9% | 142 out of 6473 background genes, 2.2% | 0.0285  | 0.00% | HMX1:CTR2:FTR1:YVC1:PHO13:IRO1:CDR1:FRP1:RBT5:SOD1:C4_04760C_A:CSR1:C4_06770W_A:ZCF20:CCC2:FET34:PTK2:CSA1:FRP2:GEF2:ALS3                                                                     |
| 7120  | axial cellular bud site selection     | 6 out of 356 genes, 1.7%  | 13 out of 6473 background genes, 0.2%  | 0.03386 | 0.00% | RAX2:RAX1:AXL2:INT1:C5_03170C_A:RSR1                                                                                                                                                          |

|       |                             |                           |                                        |         |       |                                                                                                                                                                                                |
|-------|-----------------------------|---------------------------|----------------------------------------|---------|-------|------------------------------------------------------------------------------------------------------------------------------------------------------------------------------------------------|
| 7114  | cell budding                | 11 out of 356 genes, 3.1% | 47 out of 6473 background genes, 0.7%  | 0.03582 | 0.00% | GIN4:RAX2:MYO2:CAS4:RAX1:AXL2:CLN3:INT1:C5_03170C_A:RSR1:RHO1                                                                                                                                  |
| 55080 | monoatomic homeostasis      | 20 out of 356 genes, 5.6% | 134 out of 6473 background genes, 2.1% | 0.03867 | 0.00% | HMX1:CTR2:FTR1:YVC1:PHO13:IRO1:CDR1:FRP1:RBT5:SOD1:C4_04760C_A:CSR1:C4_06770W_A:ZCF20:CCC2:FET34:CSA1:FRP2:GEF2:ALS3                                                                           |
| 33215 | reductive iron assimilation | 4 out of 356 genes, 1.1%  | 5 out of 6473 background genes, 0.1%   | 0.04452 | 0.00% | FTR1:FRP1:FET34:ALS3                                                                                                                                                                           |
| 2E+06 | mitotic cell cycle process  | 32 out of 356 genes, 9.0% | 278 out of 6473 background genes, 4.3% | 0.04978 | 0.00% | TUB2:TEM1:CDC12:CDC3:C1_11250W_A:GIN4:CDC6:RAX2:KAR9:MYO2:RAX1:MEA1:AXL2:CDC11:CLN3:MYO1:CCN1:INT1:C5_03170C_A:CAN3:PTK2:CTF5:BEM2:IQG1:CHS1:RSR1:RHO1:CDC10:CR_06740W_A:TPM2:TUB1:CR_09520C_A |
| 48878 | chemical homeostasis        | 25 out of 356 genes, 7.0% | 195 out of 6473 background genes, 3.0% | 0.05989 | 0.03% | HMX1:CTR2:FTR1:FRP3:YVC1:PHO13:RAS1:IRO1:CDR1:YCK2:FRP1:RBT5:SOD1:C4_04760C_A:CSR1:C4_06770W_A:GPR1:ZCF20:CCC2:FET34:PTK2:CSA1:FRP2:GEF2:ALS3                                                  |

|       |                                                                     |                           |                                        |         |       |                                                                                                                                              |
|-------|---------------------------------------------------------------------|---------------------------|----------------------------------------|---------|-------|----------------------------------------------------------------------------------------------------------------------------------------------|
| 71852 | fungus-type cell wall organization or biogenesis                    | 27 out of 356 genes, 7.6% | 219 out of 6473 background genes, 3.4% | 0.06065 | 0.03% | ECM33:CPH1:FEN1:CHS3:MSB2:CHK1:DCK1:YEA4:CAS4:UTR2:GFA1:EVP1:RLM1:DP M3:SOD1:RBT1:HWP1:PGA31:PHR1:SUN41:CHS1:LMO1:RHO1:CDC10:DIT2:PGA13:CHS2 |
| 71963 | establishment or maintenance of cell polarity regulating cell shape | 7 out of 356 genes, 2.0%  | 20 out of 6473 background genes, 0.3%  | 0.06165 | 0.03% | TUB2:MYO2:RHO3:RAS1:CR_06740W_A:TUB1:CR_09520C_A                                                                                             |
| 31505 | fungus-type cell wall organization                                  | 22 out of 356 genes, 6.2% | 161 out of 6473 background genes, 2.5% | 0.06383 | 0.03% | ECM33:CPH1:CHS3:MSB2:DCK1:CAS4:UTR2:EVP1:RLM1:SOD1:RBT1:HWP1:PGA31:PHR1:SUN41:CHS1:LMO1:RHO1:CDC10:DIT2:PGA13:CHS2                           |
| 45229 | external encapsulating structure organization                       | 22 out of 356 genes, 6.2% | 162 out of 6473 background genes, 2.5% | 0.0702  | 0.03% | ECM33:CPH1:CHS3:MSB2:DCK1:CAS4:UTR2:EVP1:RLM1:SOD1:RBT1:HWP1:PGA31:PHR1:SUN41:CHS1:LMO1:RHO1:CDC10:DIT2:PGA13:CHS2                           |
| 71555 | cell wall organization                                              | 22 out of 356 genes, 6.2% | 162 out of 6473 background genes, 2.5% | 0.0702  | 0.03% | ECM33:CPH1:CHS3:MSB2:DCK1:CAS4:UTR2:EVP1:RLM1:SOD1:RBT1:HWP1:PGA31:PHR1:SUN41:CHS1:LMO1:RHO1:CDC10:DIT2:PGA13:CHS2                           |

|       |                                |                           |                                        |         |       |                                                                                                                                                                                                |
|-------|--------------------------------|---------------------------|----------------------------------------|---------|-------|------------------------------------------------------------------------------------------------------------------------------------------------------------------------------------------------|
| 30010 | establishment of cell polarity | 12 out of 356 genes, 3.4% | 59 out of 6473 background genes, 0.9%  | 0.07028 | 0.03% | MSB1:RAX2:MYO2:MSB2:RHO3:RAX1:MEA1:AXL2:INT1:C5_03170C_A:C7_03480W_A:RSR1                                                                                                                      |
| 278   | mitotic cell cycle             | 32 out of 356 genes, 9.0% | 283 out of 6473 background genes, 4.4% | 0.07063 | 0.03% | TUB2:TEM1:CDC12:CDC3:C1_11250W_A:GIN4:CDC6:RAX2:KAR9:MYO2:RAX1:MEA1:AXL2:CDC11:CLN3:MYO1:CCN1:INT1:C5_03170C_A:CAN3:PTK2:CTF5:BEM2:IQG1:CHS1:RSR1:RHO1:CDC10:CR_06740W_A:TPM2:TUB1:CR_09520C_A |

|      |           |                             |                                          |         |       |                                                                                                                                                                                                                                                                                                                                                                                                                                                                                                                                                                                                                                                                                                                                                                                                                                                                                                                                                                                                                                                                           |  |  |
|------|-----------|-----------------------------|------------------------------------------|---------|-------|---------------------------------------------------------------------------------------------------------------------------------------------------------------------------------------------------------------------------------------------------------------------------------------------------------------------------------------------------------------------------------------------------------------------------------------------------------------------------------------------------------------------------------------------------------------------------------------------------------------------------------------------------------------------------------------------------------------------------------------------------------------------------------------------------------------------------------------------------------------------------------------------------------------------------------------------------------------------------------------------------------------------------------------------------------------------------|--|--|
| 6810 | transport | 144 out of 356 genes, 40.4% | 2011 out of 6473 background genes, 31.1% | 0.07508 | 0.03% | HMX1:TUB2:HGC1:C1_00830W_A:TRS20:C1_01620C_A:HOL4:HGT1:EXG2:YPT7:TE<br>M1:C1_05980W_A:CPH1:PLB5:CTR2:CLA4:SFH5:C1_11250W_A:KIP4:MCD4:FEN1:H<br>YR1:KAR9:MYO2:FTR1:SOD5:C2_01340W_A:SRD1:CHK1:DCK1:RHO3:FRP3:LSP1:LTE<br>1:PST1:C2_07220W_A:YVC1:RHO2:IRF1:DDR48:EAP1:YEA4:SSO2:KIP2:NGT1:ATO1:I<br>RO1:ARF3:UTR2:C3_01940C_A:GFA1:C3_02290W_A:CDR11:VAM3:C3_04350C_A:R<br>AX1:CDR1:YCK2:C3_05990C_A:AHR1:EVP1:FRP1:PGA7:RBT5:SPC2:C4_01220C_A:OP<br>T6:RFX2:ECE1:RBT1:HWP1:AXL2:C4_04250W_A:FAV1:CSR1:C4_04980W_A:C4_0508<br>0C_A:C4_05250W_A:ARO9:C4_05980C_A:C4_06770W_A:CDC11:C5_00230C_A:GIT<br>2:AUR1:GPR1:C5_01440C_A:ZCF20:MYO1:ECM331:PUT1:CCC2:C5_03930C_A:C5_04<br>260W_A:MAL31:FET34:CAN3:C6_01620W_A:PTK2:C6_02160W_A:SAP6:SAP5:SHE3:<br>ARG3:C6_03260W_A:SAP4:CSA1:FRP2:C7_00230W_A:DFI1:C7_00630C_A:DPP3:PG<br>A28:SNG3:C7_03500W_A:ARG1:CR_01280C_A:RSR1:GEF2:IDP2:RHO1:ATG13:WOR3<br>:RBR1:CDC10:DIT2:CR_05540C_A:MCT1:SEO1:CR_06740W_A:CR_06790C_A:ALS3:C<br>R_07220C_A:YHB1:YHB5:PGA13:CHS2:TUB1:SUC1:CR_09520C_A:CR_09570W_A:YK<br>E2:PLB3:CR_10610C_A |  |  |
|      |           |                             |                                          |         |       |                                                                                                                                                                                                                                                                                                                                                                                                                                                                                                                                                                                                                                                                                                                                                                                                                                                                                                                                                                                                                                                                           |  |  |
