# Supplementary material for: Reprogramming in Candida albicans Gene Expression Network under Butanol Stress Abrogates Hyphal Development
Source: MDPI journal article supplement (doi:10.3390/ijms242417227), 2023-12-07
Supplement: s1 [file s1]

Table S5: Primers from selected genes of *Candida albicans* used in q Real Time PCR

| S.No. | Gene Name   | Primer Sequence (5'→3')               | Primer Length |
|-------|-------------|---------------------------------------|---------------|
| 01.   | ACT1        | Forward primer ACTCTGTCTGGATTGGTGGT   | 20            |
|       |             | Reverse primer TGTGGTGAACAATGGATGGAC  | 21            |
| 02.   | ALS3        | Forward primer TCGTCCTCATTACACCAAC    | 19            |
|       |             | Reverse primer ACAGAAACCCAAGAACAAC    | 19            |
| 03.   | ECE1        | Forward primer CTCAAGCTGCCATCATCCA    | 19            |
|       |             | Reverse primer TGCAGGAACAGTAGGTGCT    | 19            |
| 04.   | HWP1        | Forward Primer CTGCTCAACTTATTGCTATC   | 20            |
|       |             | Reverse primer CATCACATGGTTCTTGATAG   | 20            |
| 05.   | RME1        | Forward primer CACCGGAATCTCCACACA     | 18            |
|       |             | Reverse primer AGGTAGCAGAGCCCAAAG     | 18            |
| 06.   | SAP5        | Forward primer GGTGACGGTTCTTACGCT     | 18            |
|       |             | Reverse primer GTCGTAATCAAACTCGGTAG   | 20            |
| 07.   | UME6        | Forward primer AGTGGTTTCATCAATACCAGA  | 20            |
|       |             | Reverse primer ACAATTTTGGAGCAATCACC   | 20            |
| 08.   | WOR3        | Forward primer AGCCCAAGGGAGATGTGTTC   | 20            |
|       |             | Reverse primer CCTCGTGCAGGCTTTTCTTG   | 20            |
| 09.   | YWP1        | Forward primer CCAGGTACTTTGACACCGGAA  | 21            |
|       |             | Reverse primer GGCAGCTTTACCAGAACCTGA  | 21            |
| 10.   | C4_05010W_A | Forward primer GTTTGGGACACCACAACAAGA  | 21            |
|       |             | Reverse primer TGAACCAGACCATTTAACACAA | 22            |
| 11.   | C5_03440W_A | Forward primer CAGCACCTCAAAACGATAAA   | 20            |
|       |             | Reverse primer CAATGGAAGTTGCTTTTCAGT  | 21            |
